# Supplementary material for: Diseases, Injuries, and Risk Factors in Child and Adolescent Health, 1990 to 2017: Findings From the Global Burden of Diseases, Injuries, and Risk Factors 2017 Study
Source: JAMA Pediatr. 2019 Apr 29;173(6):e190337. doi: 10.1001/jamapediatrics.2019.0337 (PMC6547084; doi:10.1001/jamapediatrics.2019.0337)
Supplement: Supplement. — eFigure 1. GBD 2017 Socio-demographic index (SDI) quintiles by GBD administrative level 1 geography eFigure 2. Decomposition of the probability of death in 195 countries for <20 years from 1990 to 2017, both sexes combined eFigure 3. Trends of DALYs from 1990 to 2017 for global and SDI quintiles for <1, 1-4, 5-9, 10-19 years eFigure 4. Trends of DALYs from 1990 to 2017 by age group (<1, 1-4, 5-9, 10-19 years) for global and SDI quintiles eFigure 5. Coevolution of disability-adjusted life years (DALYs) and socio-demographic index (SDI) for global disease burden (GDB) study regions and level 1 causes eFigure 6. Map of percent change for observed to expected (O:E) all-cause DALY rates from 1990 to 2000, 2000 to 2017 for <1, 1-4, 5-9, 10-19 years eFigure 7. Annual percent change of observed to expected (O:E) all-cause DALY rates in <20 years from 1990 to 2000 versus 2000 to 2017 eFigure 8. Leading ten causes of DALYs with the ratio of observed to expected on the basis of SDI alone in 2017 for a) <20 years, b) <1 years, c) 1-4 years, d) 5-9 years, and e) 10-19 years for both sexes combined eFigure 9. Co-evolution of YLL to YLD ratios and SDI for GBD regions and Level 1 causes, 1990 o 2017, both sexes combined for a) all causes, b) CMNN, c) NCDs, d) Injuries eFigure 10. Leading ten causes of YLDs with the ratio of observed to expected on the basis of SDI alone in 2017 for a) <20 years, b) <1 years, c) 1-4 years, d) 5-9 years, and e) 10-19 years for both sexes combined eFigure 11. Percent change in MMR vs. percent change in all-cause child DALYs rate for <1, 1-4, 5-9, and 10-19 years, 1990-2017 eTable 1. SDI groupings by location, based on GBD 2017 values eTable 2. ENN, LNN, PNN, 1-4, 5-9, 10-14, 15-19, <1, <5, 10-19, and <20 years mortality in 1990, 2000 and 2017 with mean percentage change for all GBD causes eTable 3. Percent change of observed to expected DALYs rate from 1990 to 2000 and 2000 to 2017 for each GBD location, for all causes combined and separately for comm [file jamapediatr-173-e190337-s001.pdf]

## Supplementary Online Content

GBD 2017 Child and Adolescent Health Collaborators. Diseases, injuries, and risk factors in child and adolescent health, 1990 to 2017: findings from the Global Burden of Diseases, Injuries, and Risk Factors 2017 Study. *JAMA Pediatr*. Published online April 29, 2019. doi:10.1001/jamapediatrics.2019.0337

**eFigure 1.** GBD 2017 Socio-demographic index (SDI) quintiles by GBD administrative level 1 geography

**eFigure 2.** Decomposition of the probability of death in 195 countries for <20 years from 1990 to 2017, both sexes combined

**eFigure 3.** Trends of DALYs from 1990 to 2017 for global and SDI quintiles for <1, 1-4, 5-9, 10-19 years

**eFigure 4.** Trends of DALYs from 1990 to 2017 by age group (<1, 1-4, 5-9, 10-19 years) for global and SDI quintiles

**eFigure 5.** Map of percent change for observed to expected (O:E) all-cause DALY rates from 1990 to 2000, 2000 to 2017 for <1, 1-4, 5-9, 10-19 years

**eFigure 6.** Annual percent change of observed to expected (O:E) all-cause DALY rates in <20 years from 1990 to 2000 versus 2000 to 2017

**eFigure 7.** Leading ten causes of DALYs with the ratio of observed to expected on the basis of SDI alone in 2017 for a) <20 years, b) <1 years, c) 1-4 years, d) 5-9 years, and e) 10-19 years for both sexes combined

**eFigure 8.** Co-evolution of YLL to YLD ratios and SDI for GBD regions and Level 1 causes, 1990 to 2017, both sexes combined for a) all causes, b) CMNN, c) NCDs, d) Injuries

**eFigure 9.** Leading ten causes of YLDs with the ratio of observed to expected on the basis of SDI alone in 2017 for a) <20 years, b) <1 years, c) 1-4 years, d) 5-9 years, and e) 10-19 years for both sexes combined

**eFigure 10.** Percent change in MMR vs. percent change in all-cause child DALYs rate for <1, 1-4, 5-9, and 10-19 years, 1990-2017

**eTable 1.** SDI groupings by location, based on GBD 2017 values

**eTable 2.** ENN, LNN, PNN, 1-4, 5-9, 10-14, 15-19, <1, <5, 10-19, and <20 years mortality in 1990, 2000 and 2017 with mean percentage change for all GBD causes

**eTable 3.** Percent change of observed to expected DALYs rate from 1990 to 2000 and 2000 to 2017 for each GBD location, for all causes combined and separately for communicable, maternal, neonatal, and nutritional (CMNN), non-communicable diseases (NCDs), and injuries for a) <20 years, b) <1 years, c) 1-4 years, d) 5-9 years, and e) 10-19 years, both sexes combined

**eFigure 1. GBD 2017 Socio-demographic index quintiles by GBD geography**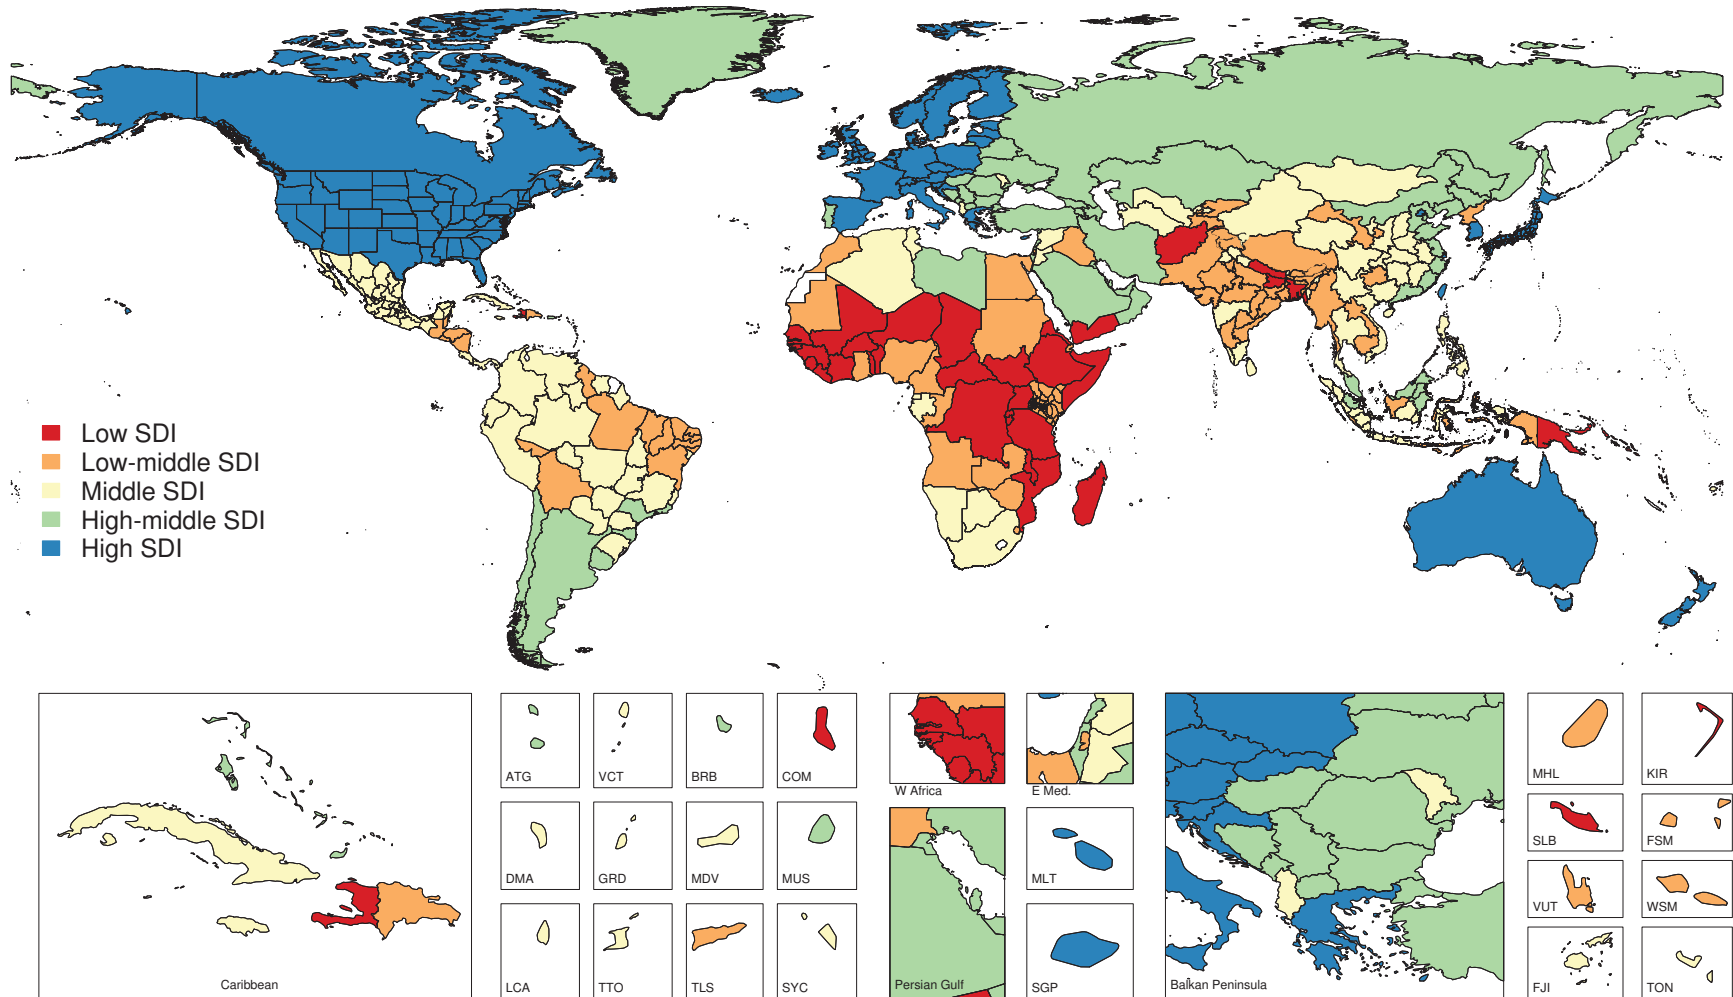

Socio-demographic index quintiles for each GBD analytic location are color-coded. SDI is calculated by principal components analysis of per capita income, years of education in persons 15 years and older, and total fertility rate under 25 years. Inset plots provided for detailed inspection of small or clustered regions. Abbreviations: GBD=Global Burden of Disease, ATG = Antigua and Barbuda, DMA = Dominica, LCA = Saint Lucia, VCT = Saint Vincent and the Grenadines, GRD = Grenada, TTO = Trinidad and Tobago, BRB = Barbados, MDV = Maldives, TLS = Timor-Leste, COM = Comoros, MUS = Mauritius, SYC = Seychelles, MLT = Malta, SGP = Singapore, MHL = Marshall Islands, SLB = Solomon Islands, VUT = Vanuatu, FJI = Fiji, KIR = Kiribati, FSM = Federated States of Micronesia, WSM = Samoa, TON = Tonga

Figure 2. Decomposition of the Probability of Death in 195 countries for <20 years from 1990 to 2017, both sexes combined

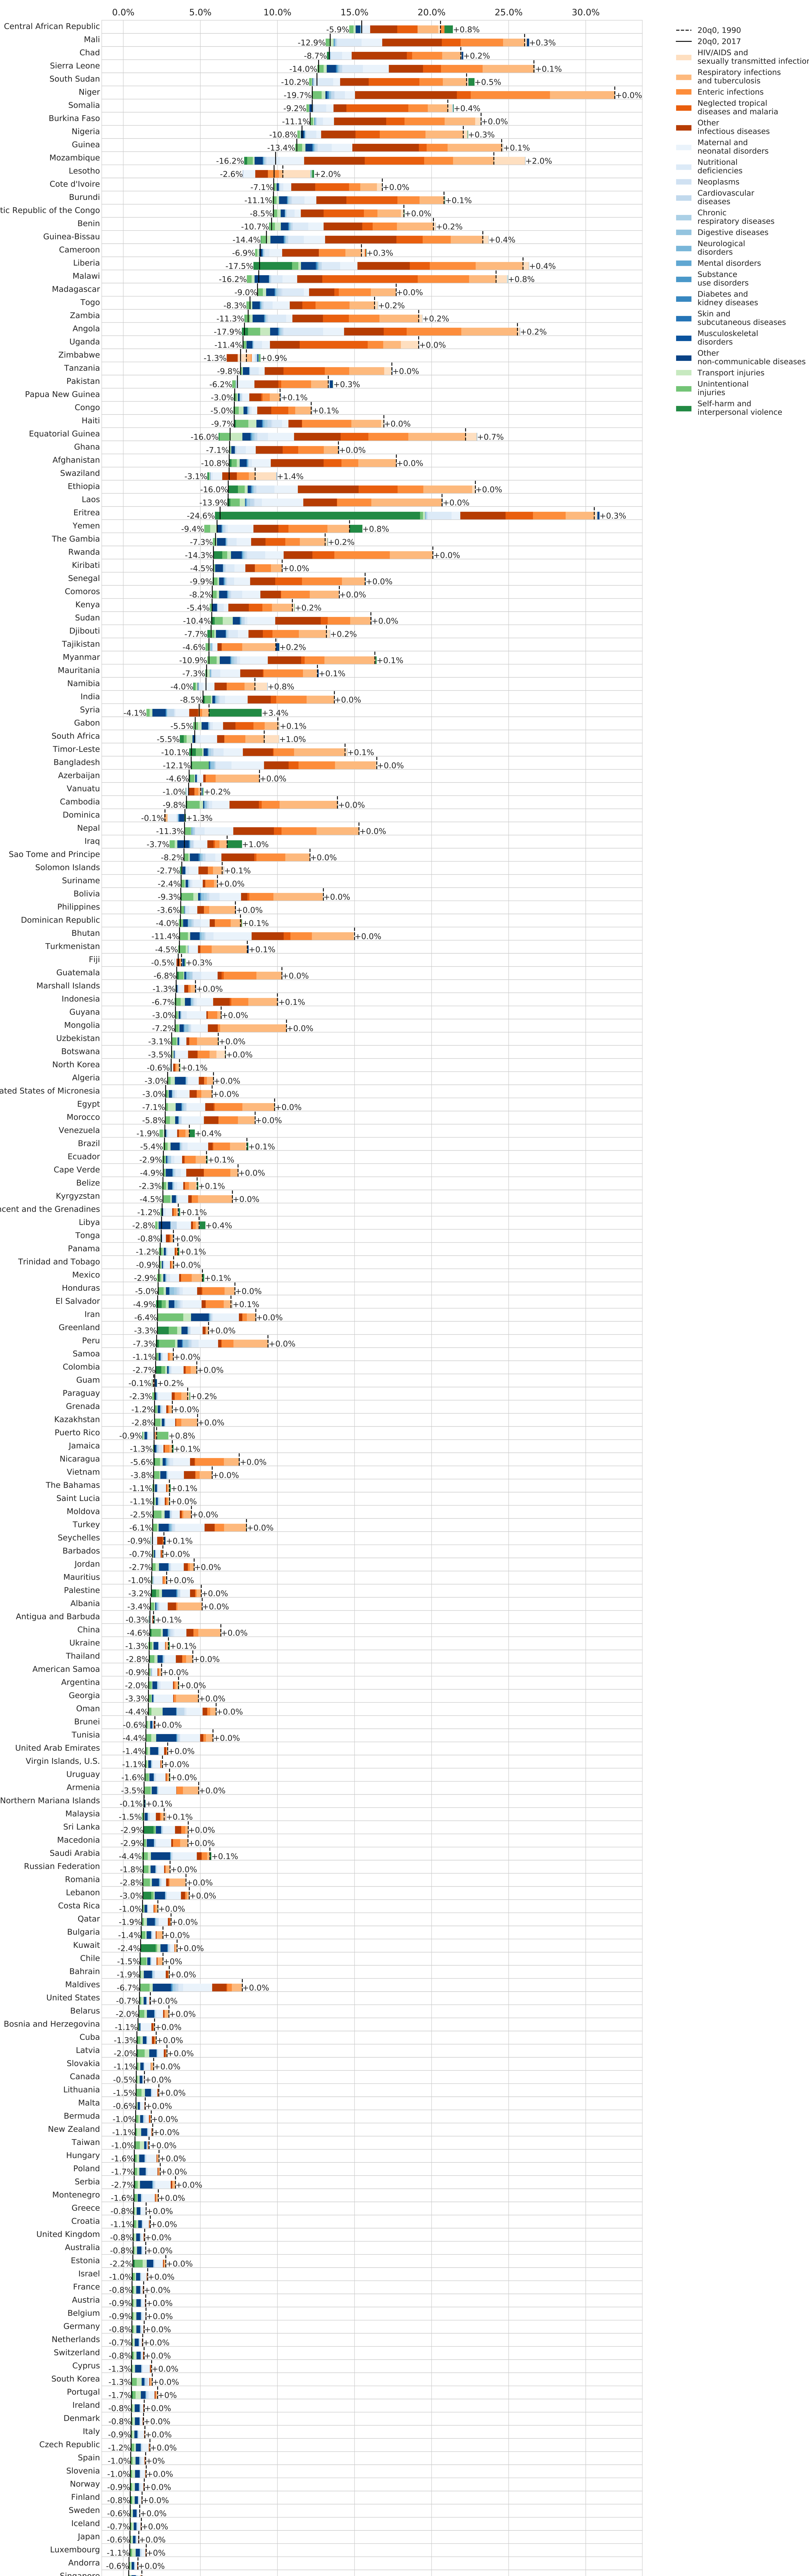

Probability of death between birth and age 20 is plotted by country for 1990 (dashed vertical line) and 2017 (solid vertical line). The relative contribution of that change due to the 22 different level 2 causes is indicated by different color bars. Any bar to the right of the dashed vertical line increased mortality over the period while all those to the left decreased. Countries are sorted from highest probability of death in 2017 to lowest. Country data are ordered according to probability of death in 2017,

**eFigure 3. Trends of DALYs from 1990 to 2017 for global and SDI quintiles for <1, 1-4, 5-9, 10-19.**

© 2019 GBD 2017 Child and Adolescent Health Collaborators. JAMA Pediatrics.

5

(a) <1 year

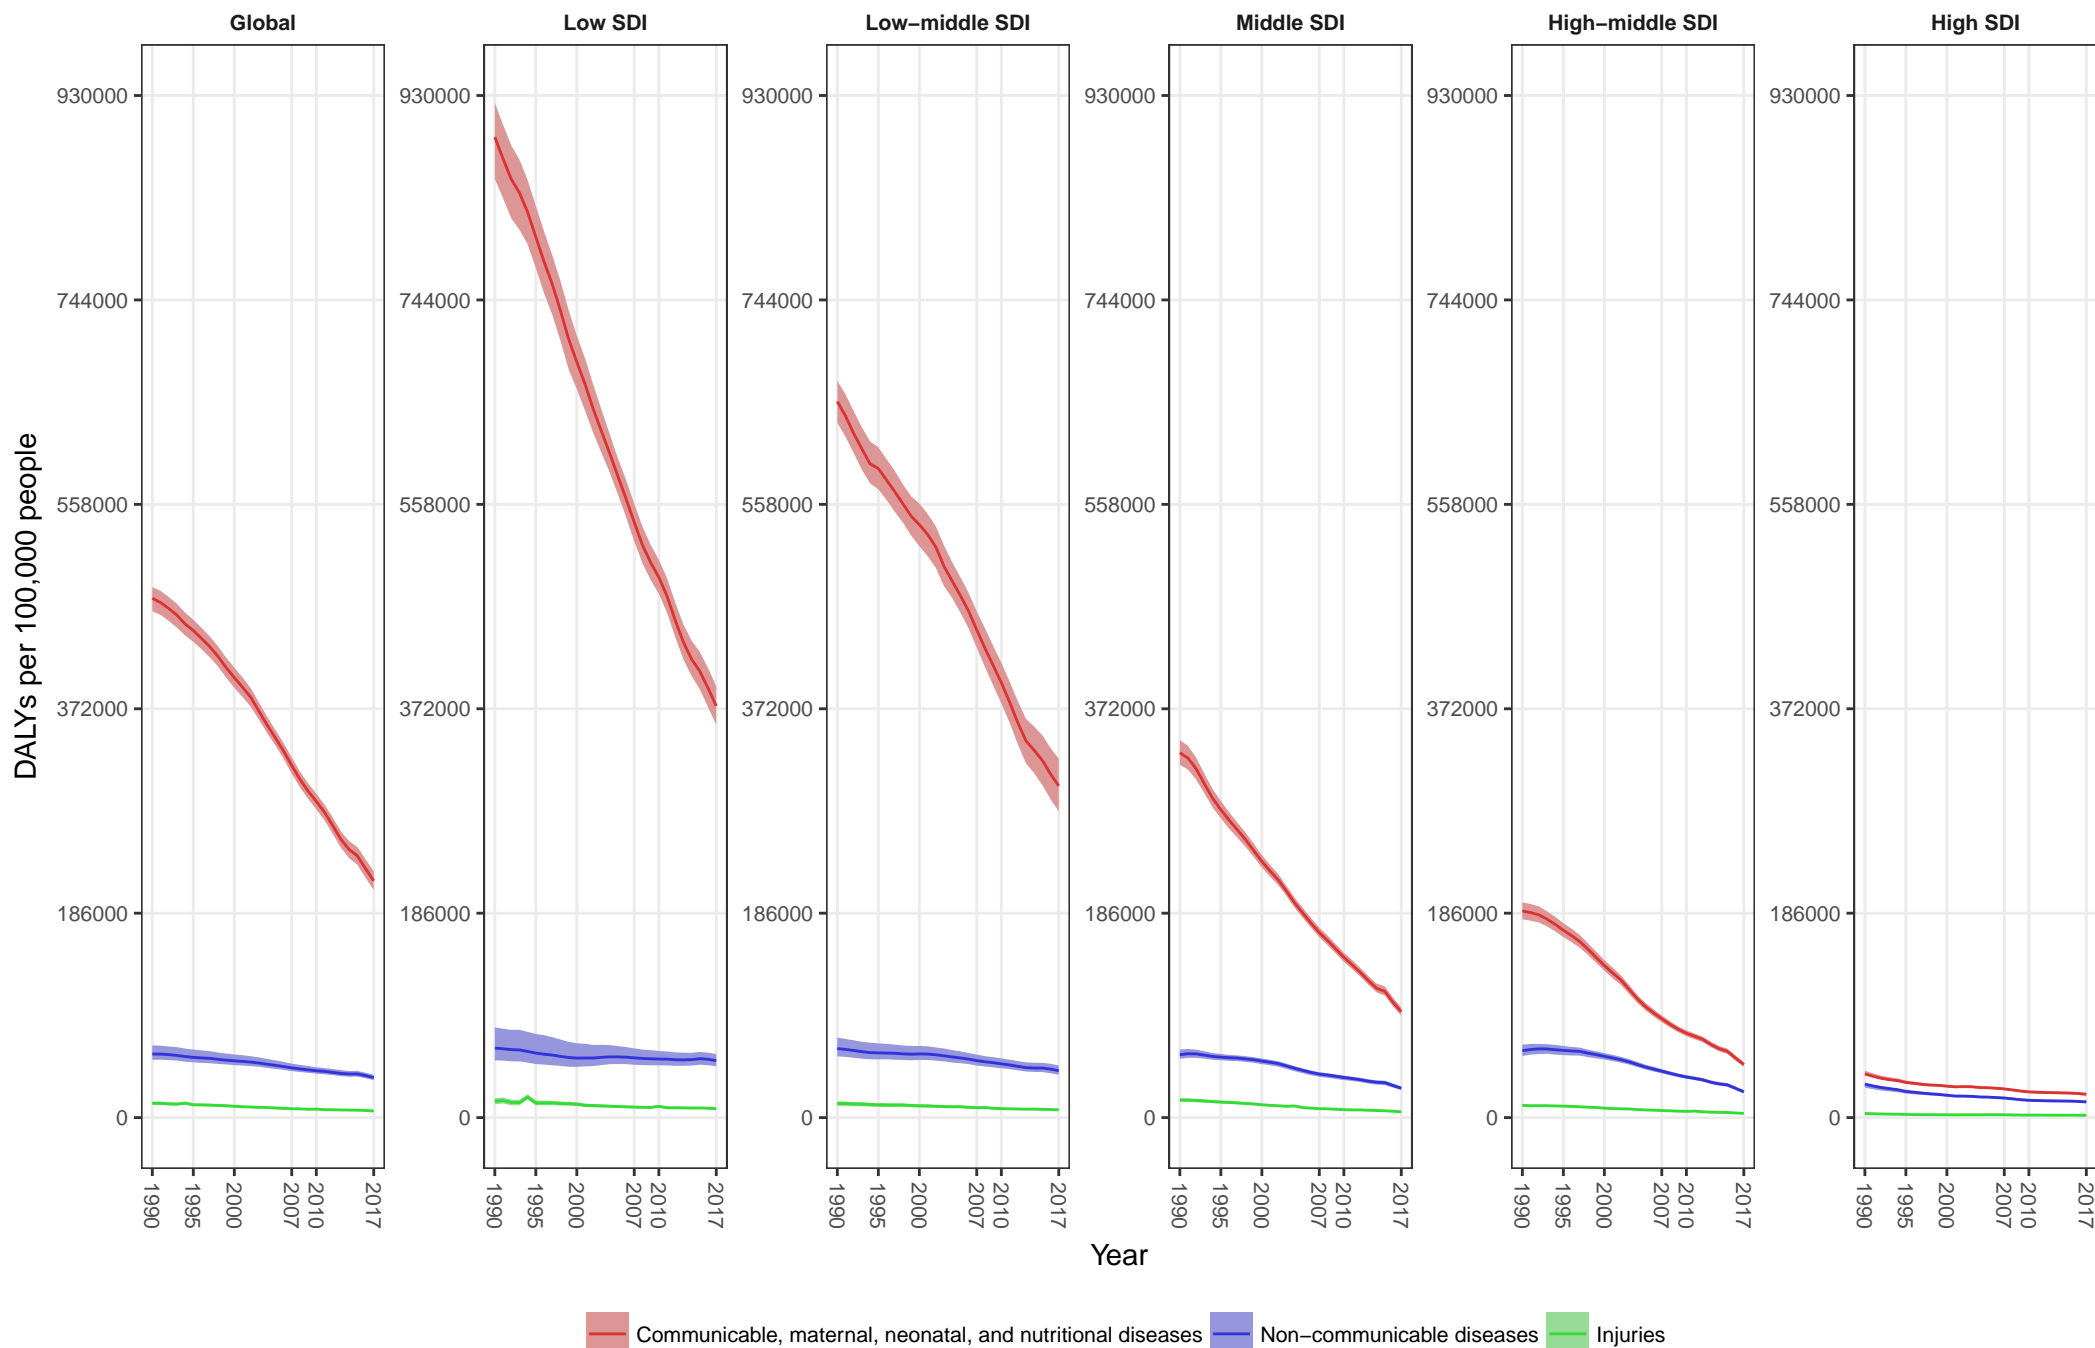

Temporal trends in disability adjusted life years (DALYs) are plotted for each adolescent age group. Panel a) less than 1 year old; panel b) between 1 and 4 years old; panel c) between 5 and 9 years old; panel d) between 10 and 19 years old. Within each panel, global trends are plotted in left sub-panel and the corresponding trends for each SDI quintile is plotted in the next 4 sub-panels. Shaded areas show 95% UIs. Communicable, maternal, neonatal, and nutritional disorders (CMNN) are shown in red, non-communicable disease (NCD) causes in blue, and injuries in green. Abbreviations: SDI=Socio-demographic Index.

**eFigure 3. Trends of DALYs from 1990 to 2017 for global and SDI quintiles for <1, 1-4, 5-9, 10-19.**

© 2019 GBD 2017 Child and Adolescent Health Collaborators. JAMA Pediatrics.

6

(b) 1 to 4 years

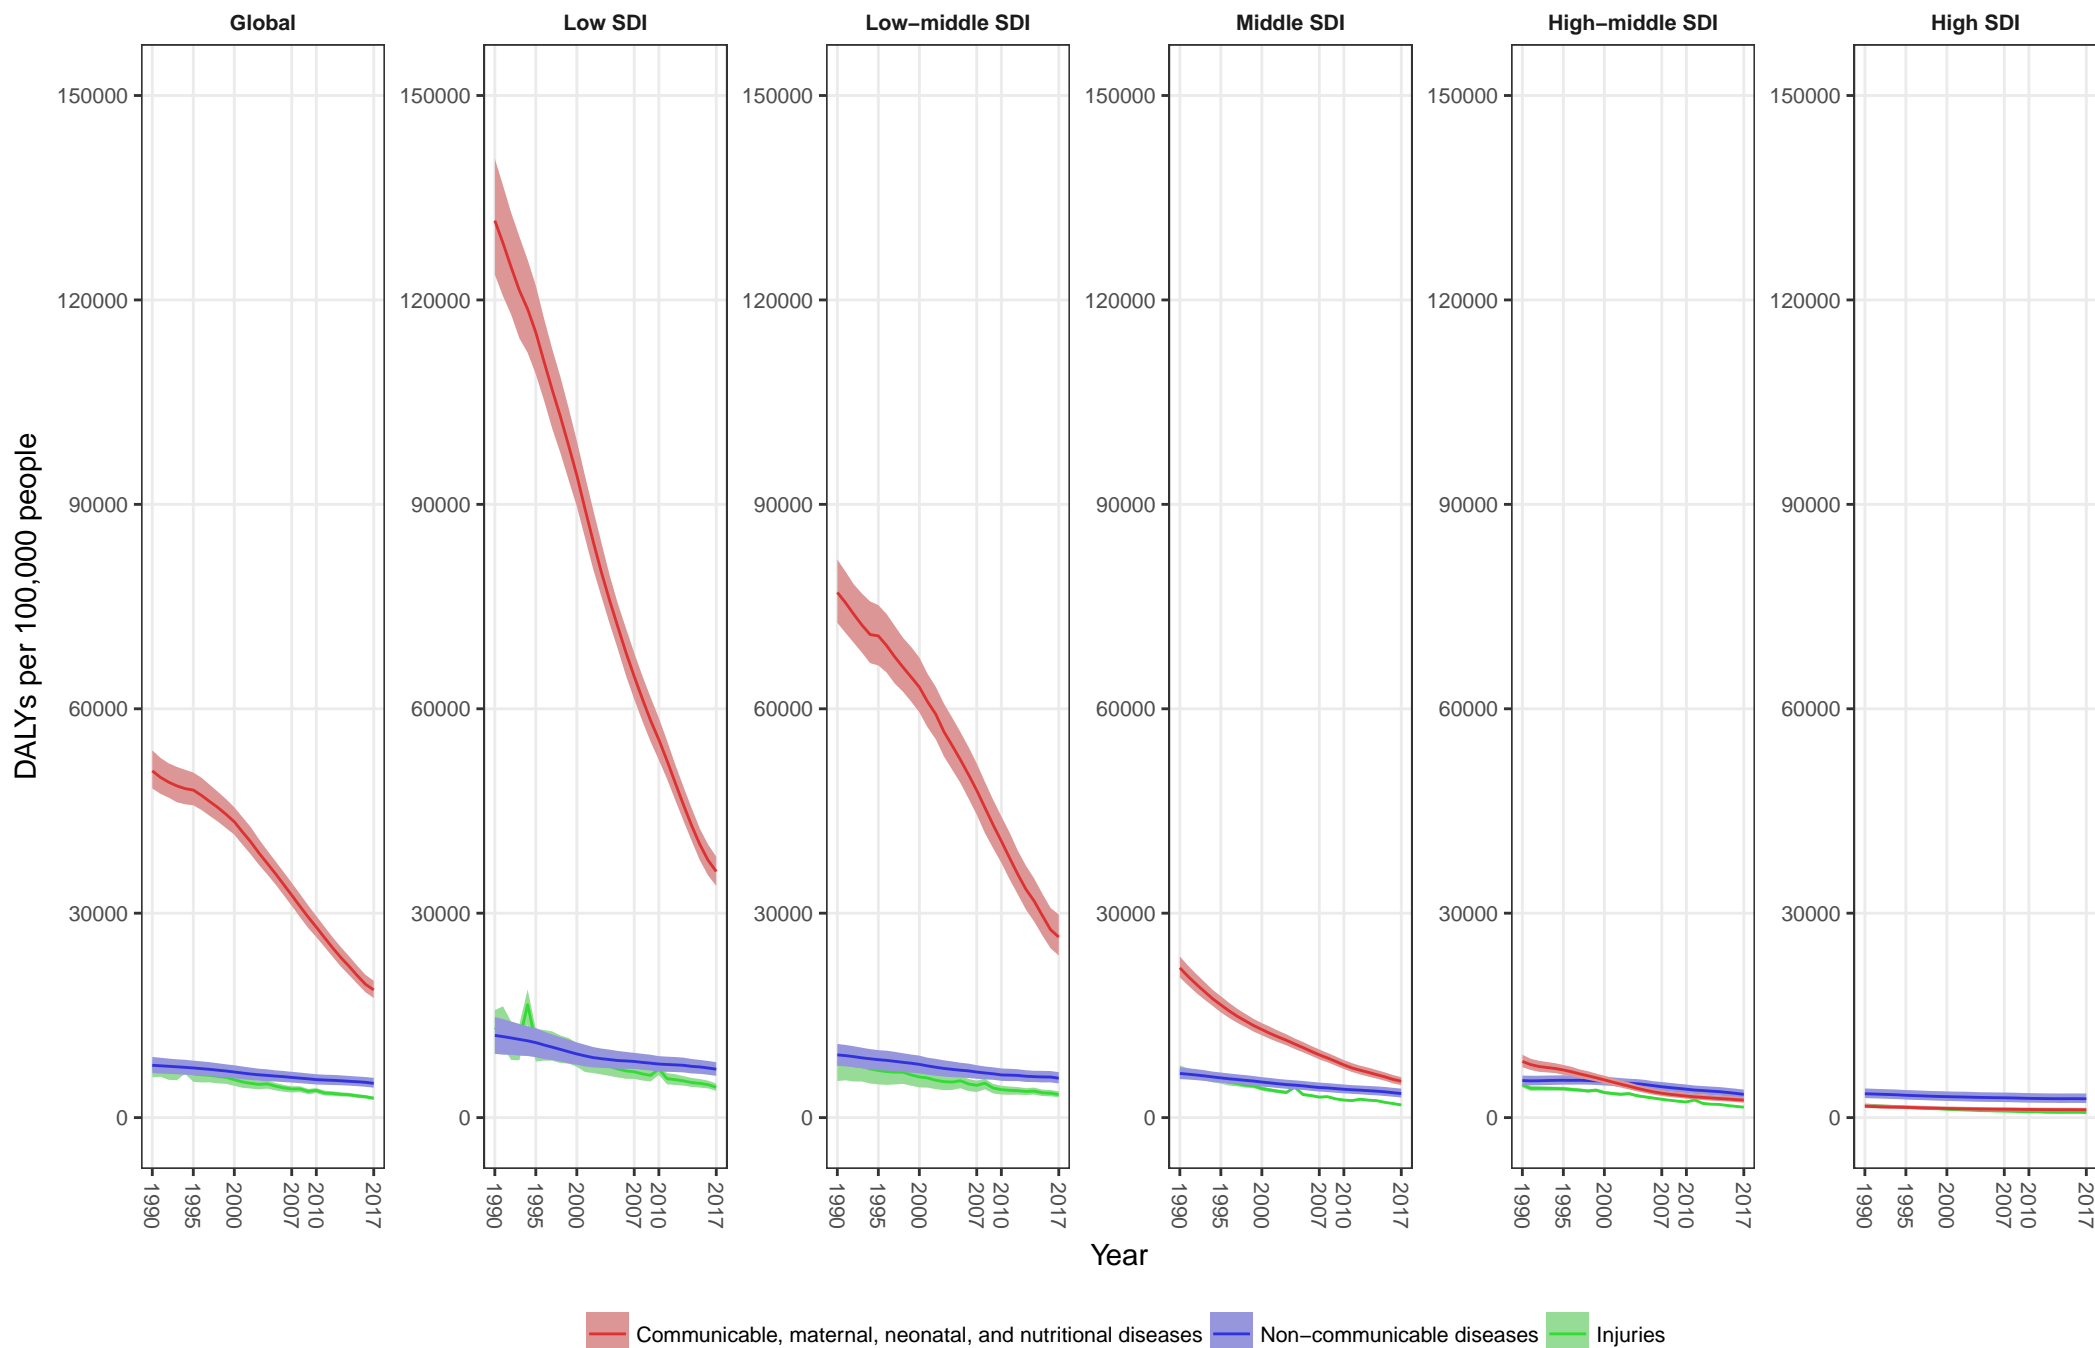

Temporal trends in disability adjusted life years (DALYs) are plotted for each adolescent age group. Panel a) less than 1 year old; panel b) between 1 and 4 years old; panel c) between 5 and 9 years old; panel d) between 10 and 19 years old. Within each panel, global trends are plotted in left sub-panel and the corresponding trends for each SDI quintile is plotted in the next 4 sub-panels. Shaded areas show 95% UIs. Communicable, maternal, neonatal, and nutritional disorders (CMNND) are shown in red, non-communicable disease (NCD) causes in blue, and injuries in green. Abbreviations: SDI=Socio-demographic Index.

**eFigure 3. Trends of DALYs from 1990 to 2017 for global and SDI quintiles for <1, 1-4, 5-9, 10-19.**

© 2019 GBD 2017 Child and Adolescent Health Collaborators. JAMA Pediatrics.

7

(c) 5 to 9 years

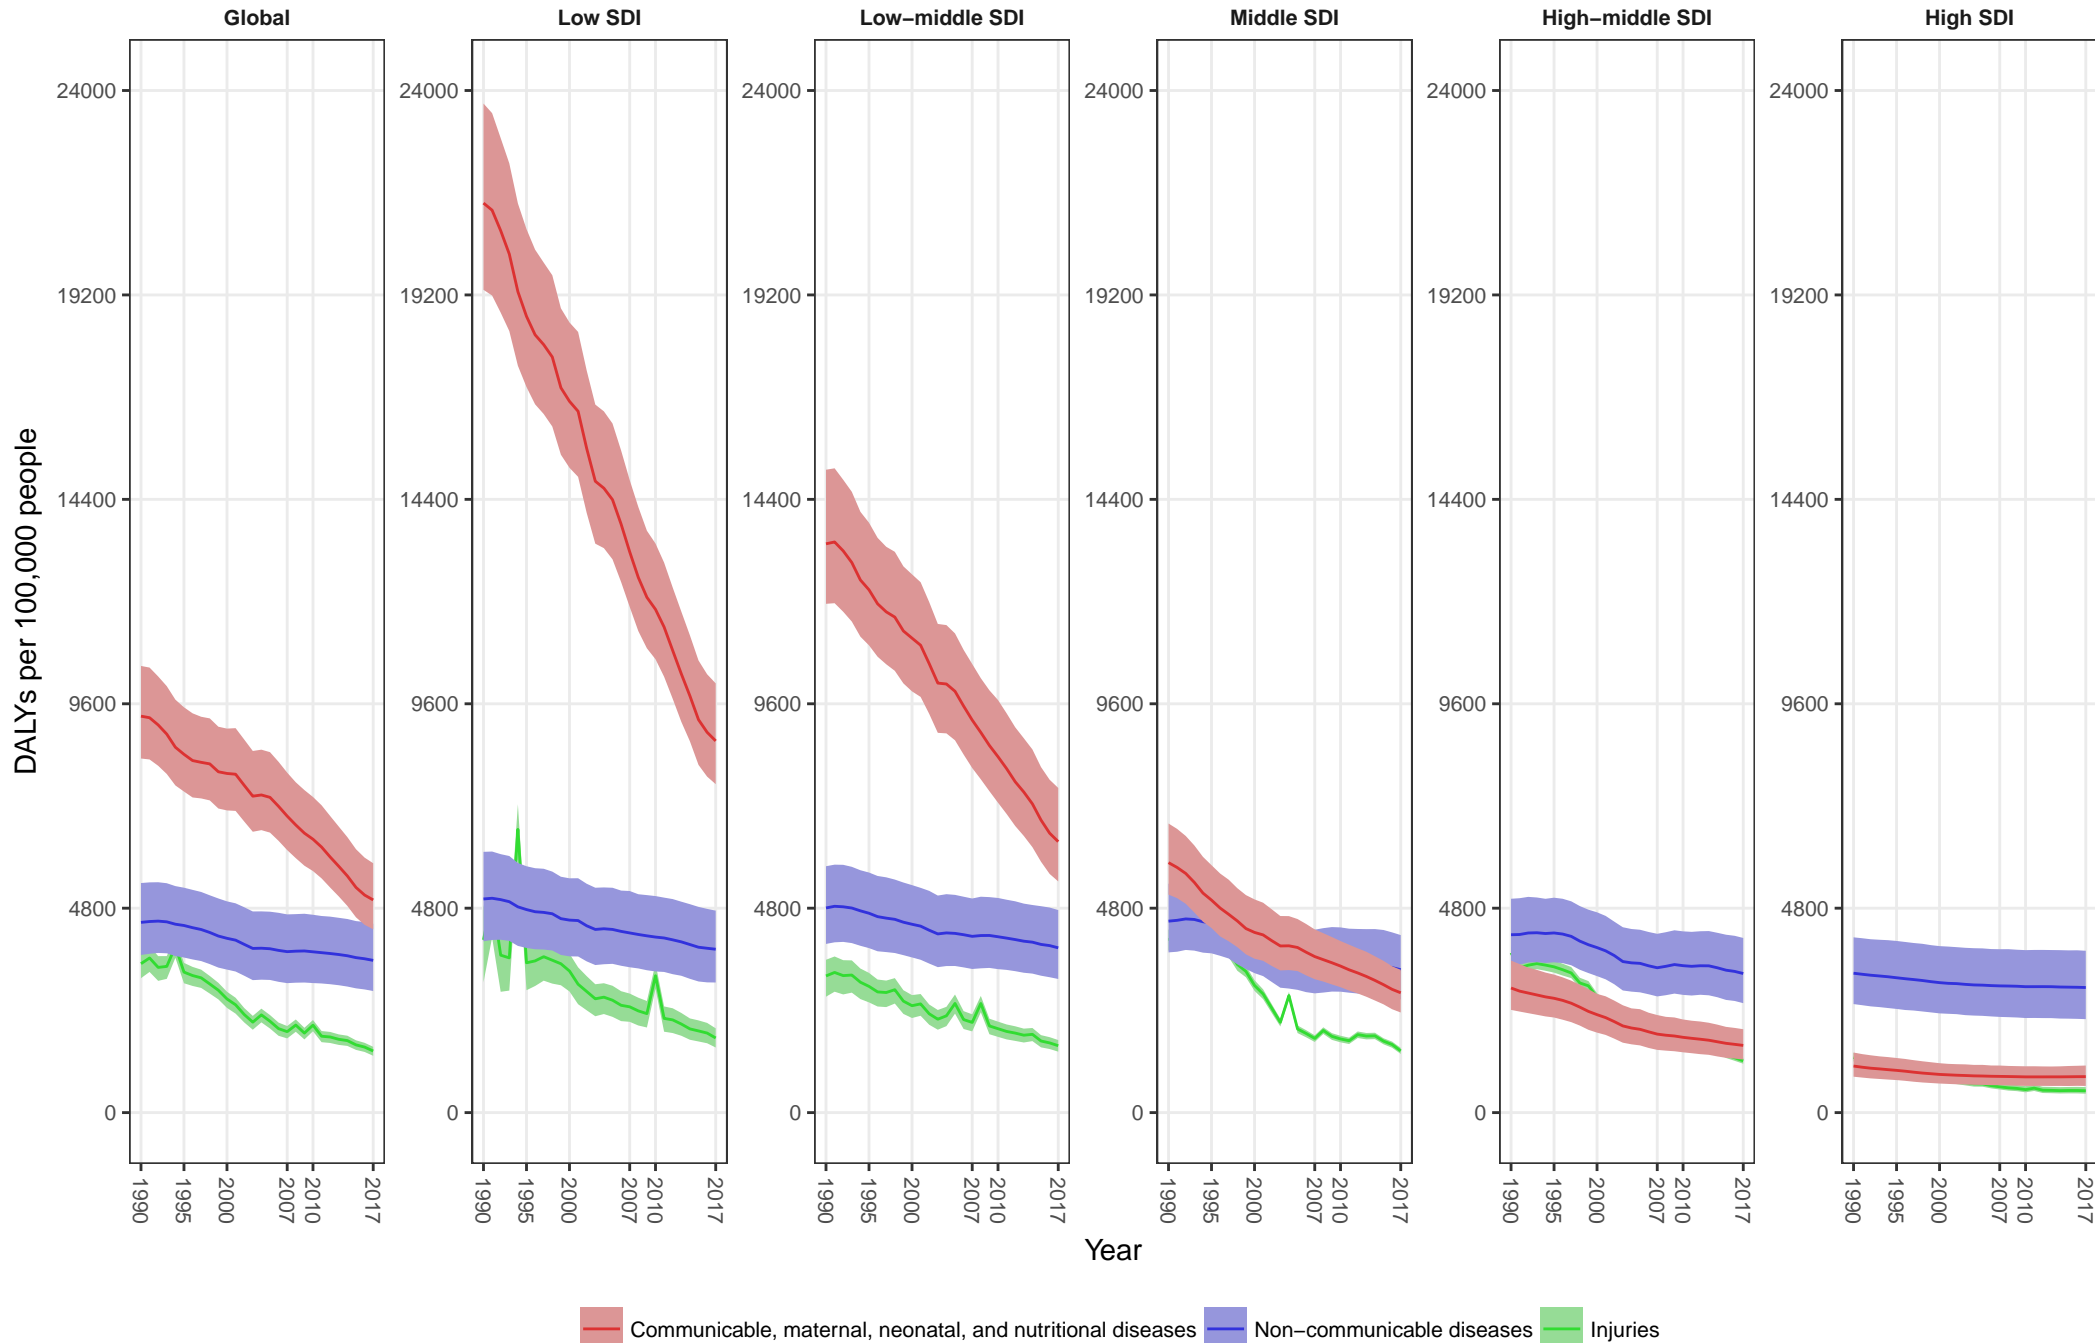

Temporal trends in disability adjusted life years (DALYs) are plotted for each adolescent age group. Panel a) less than 1 year old; panel b) between 1 and 4 years old; panel c) between 5 and 9 years old; panel d) between 10 and 19 years old. Within each panel, global trends are plotted in left sub-panel and the corresponding trends for each SDI quintile is plotted in the next 4 sub-panels. Shaded areas show 95% UIs. Communicable, maternal, neonatal, and nutritional disorders (CMNN) are shown in red, non-communicable disease (NCD) causes in blue, and injuries in green. Abbreviations: SDI=Socio-demographic Index.

**eFigure 3. Trends of DALYs from 1990 to 2017 for global and SDI quintiles for <1, 1-4, 5-9, 10-19.**

© 2019 GBD 2017 Child and Adolescent Health Collaborators. JAMA Pediatrics.

8

(d) 10 to 19 years

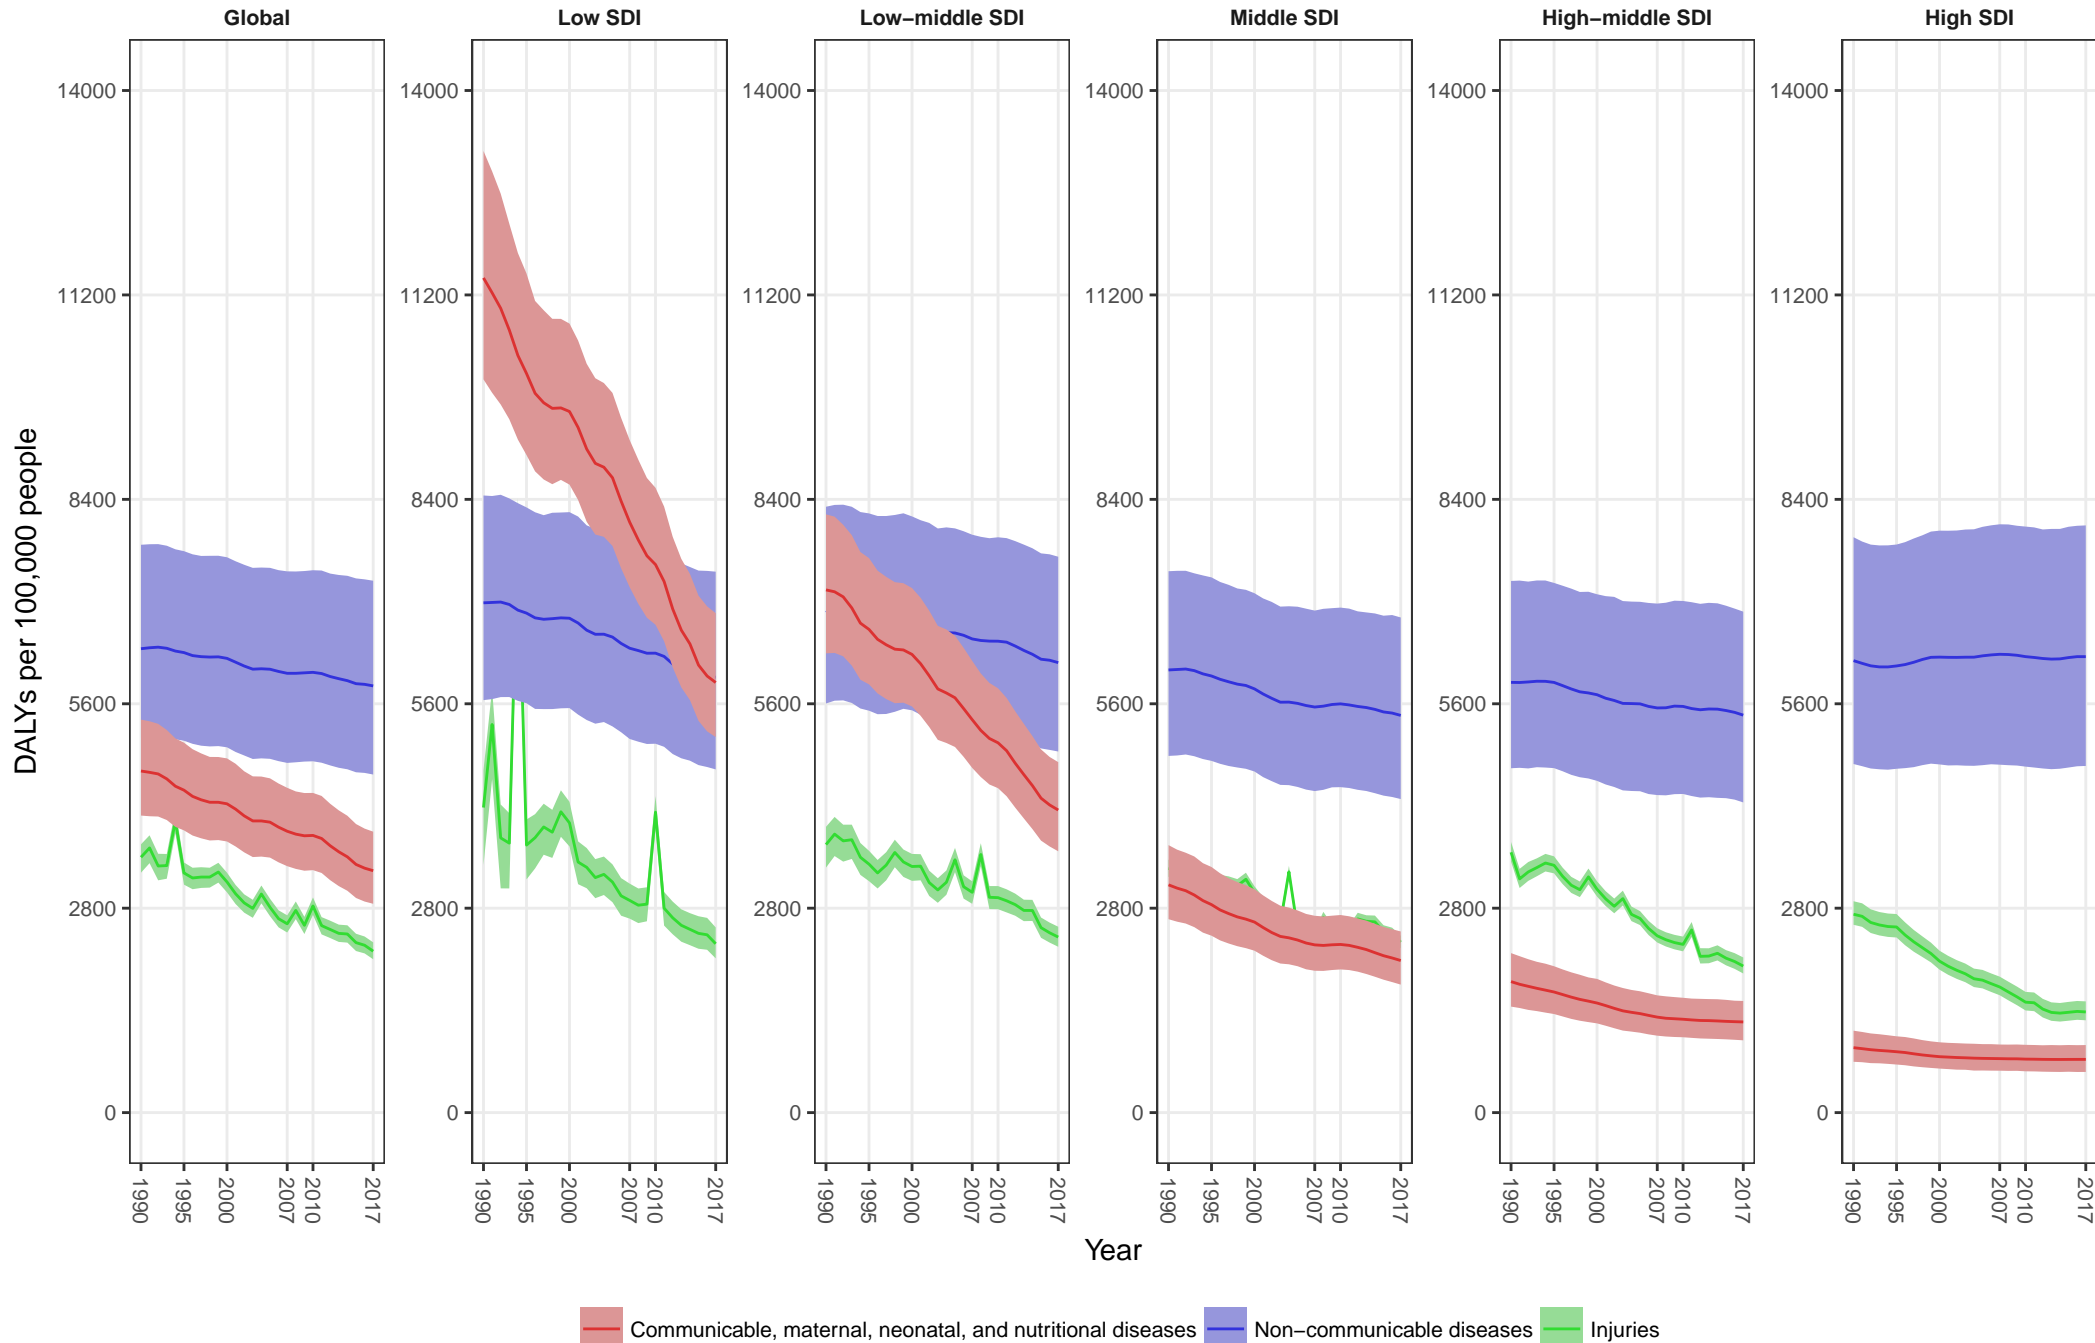

Temporal trends in disability adjusted life years (DALYs) are plotted for each adolescent age group. Panel a) less than 1 year old; panel b) between 1 and 4 years old; panel c) between 5 and 9 years old; panel d) between 10 and 19 years old. Within each panel, global trends are plotted in left sub-panel and the corresponding trends for each SDI quintile is plotted in the next 4 sub-panels. Shaded areas show 95% UIs. Communicable, maternal, neonatal, and nutritional disorders (CMNN) are shown in red, non-communicable disease (NCD) causes in blue, and injuries in green. Abbreviations: SDI=Socio-demographic Index.

**eFigure 4. Trends of DALYs from 1990 to 2017 by age group (<1, 1-4, 5-9, 10-19 years) for global and SDI quintiles.**

(a) Global

© 2019 GBD 2017 Child and Adolescent Health Collaborators. JAMA Pediatrics.

9

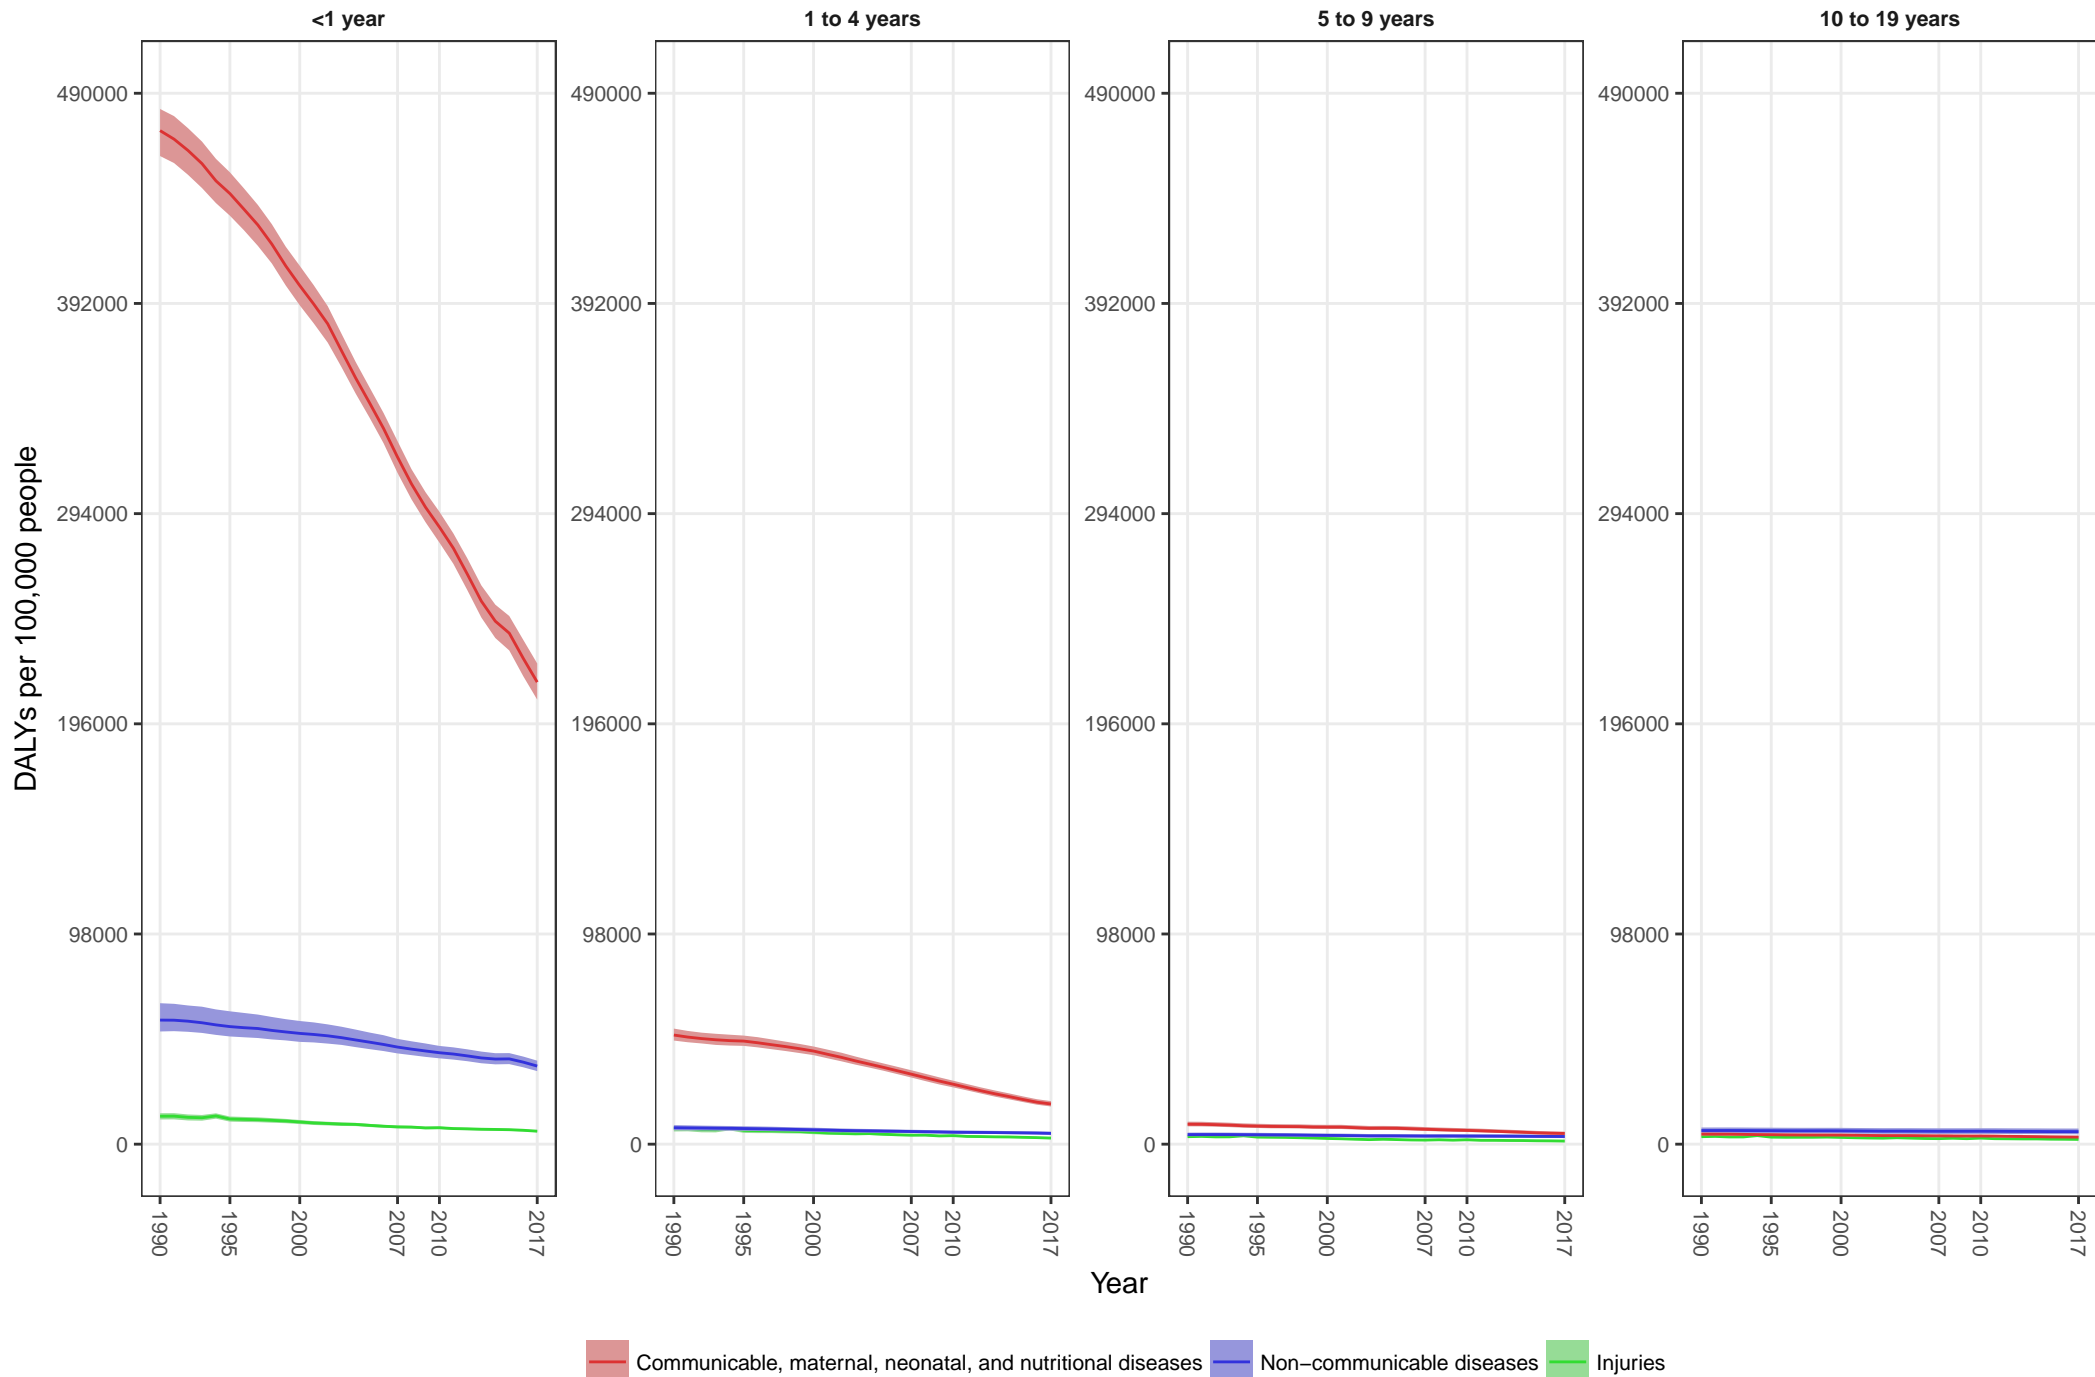

Temporal trends in disability adjusted life years (DALYs) are plotted across age groups globally and for each socio-demographic index (SDI) quintile. Panel a) global; panel b) low SDI; panel c) low-middle SDI; panel d) middle SDI; panel e) high-middle SDI; panel f) high SDI. Within each panel, trends for children less than 1 are plotted in left sub-panel, between 1 and 4 in the second sub-panel, between 5 and 9 in the third sub-panel, and between 10 and 19 in the right sub-panel. Shaded areas show 95% UIs. Communicable, maternal, neonatal, and nutritional disorders (CMNN) are shown in red, non-communicable disease (NCD) causes in blue, and injuries in green. Abbreviations: DALY=disability-adjusted life year, SDI=Socio-demographic Index.

**eFigure 4. Trends of DALYs from 1990 to 2017 by age group (<1, 1-4, 5-9, 10-19 years) for global and SDI quintiles.**

(b) Low SDI

© 2019 GBD 2017 Child and Adolescent Health Collaborators. JAMA Pediatrics.

10

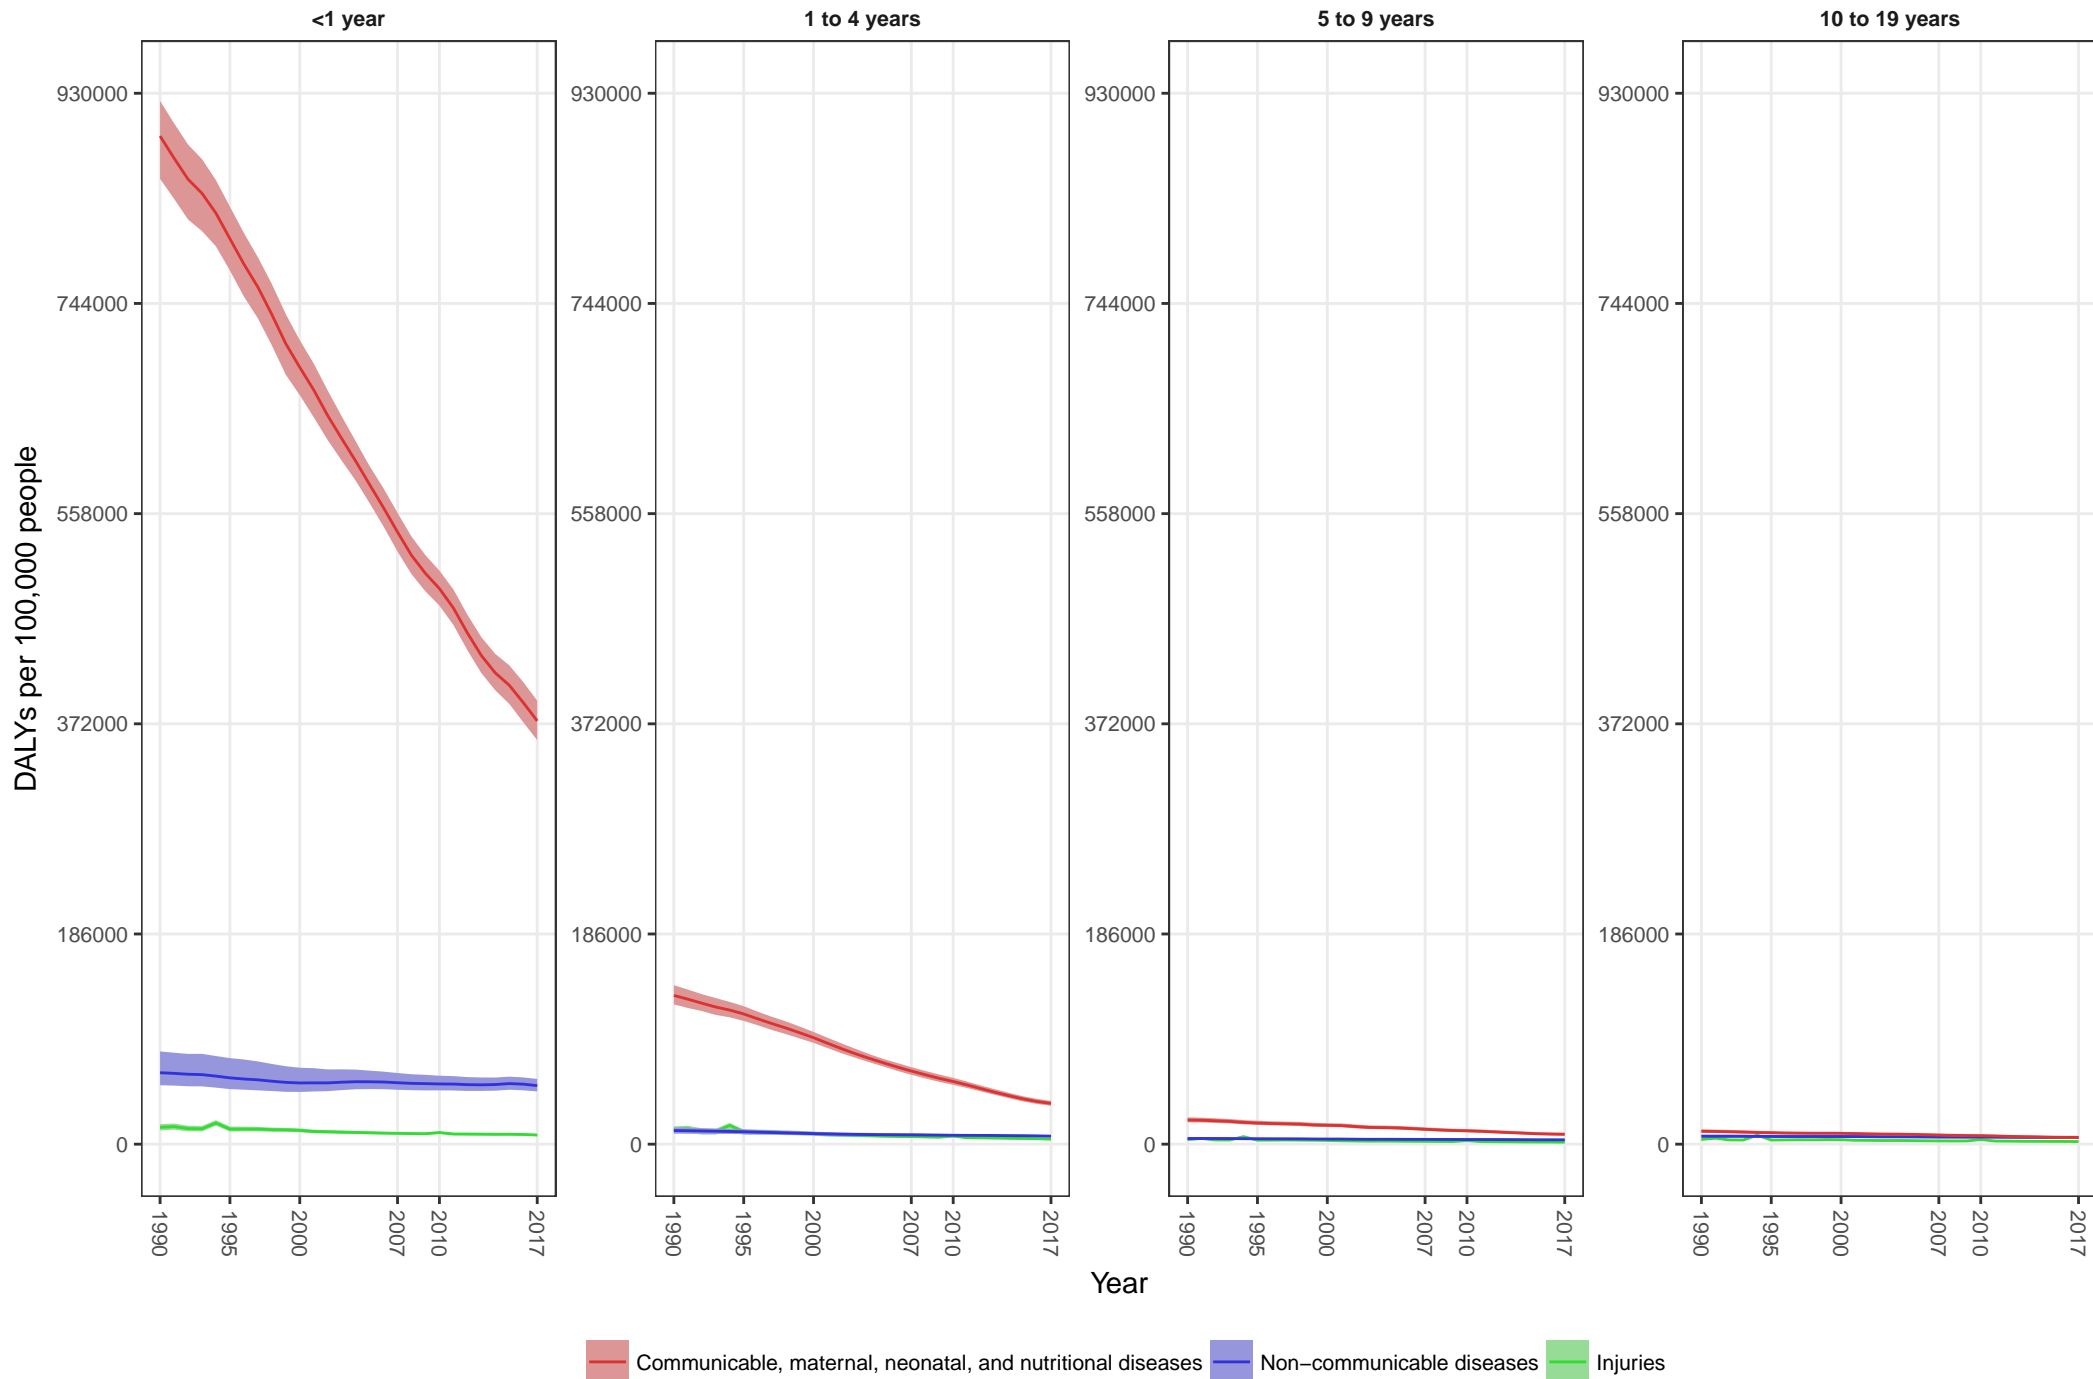

Temporal trends in disability adjusted life years (DALYs) are plotted across age groups globally and for each socio-demographic index (SDI) quintile. Panel a) global; panel b) low SDI; panel c) low-middle SDI; panel d) middle SDI; panel e) high-middle SDI; panel f) high SDI. Within each panel, trends for children less than 1 are plotted in left sub-panel, between 1 and 4 in the second sub-panel, between 5 and 9 in the third sub-panel, and between 10 and 19 in the right sub-panel. Shaded areas show 95% UIs. Communicable, maternal, neonatal, and nutritional disorders (CMNN) are shown in red, non-communicable disease (NCD) causes in blue, and injuries in green. Abbreviations: DALY=disability-adjusted life year, SDI=Socio-demographic Index.

**eFigure 4. Trends of DALYs from 1990 to 2017 by age group (<1, 1-4, 5-9, 10-19 years) for global and SDI quintiles.**

(c) Low-middle SDI

© 2019 GBD 2017 Child and Adolescent Health Collaborators. JAMA Pediatrics.

11

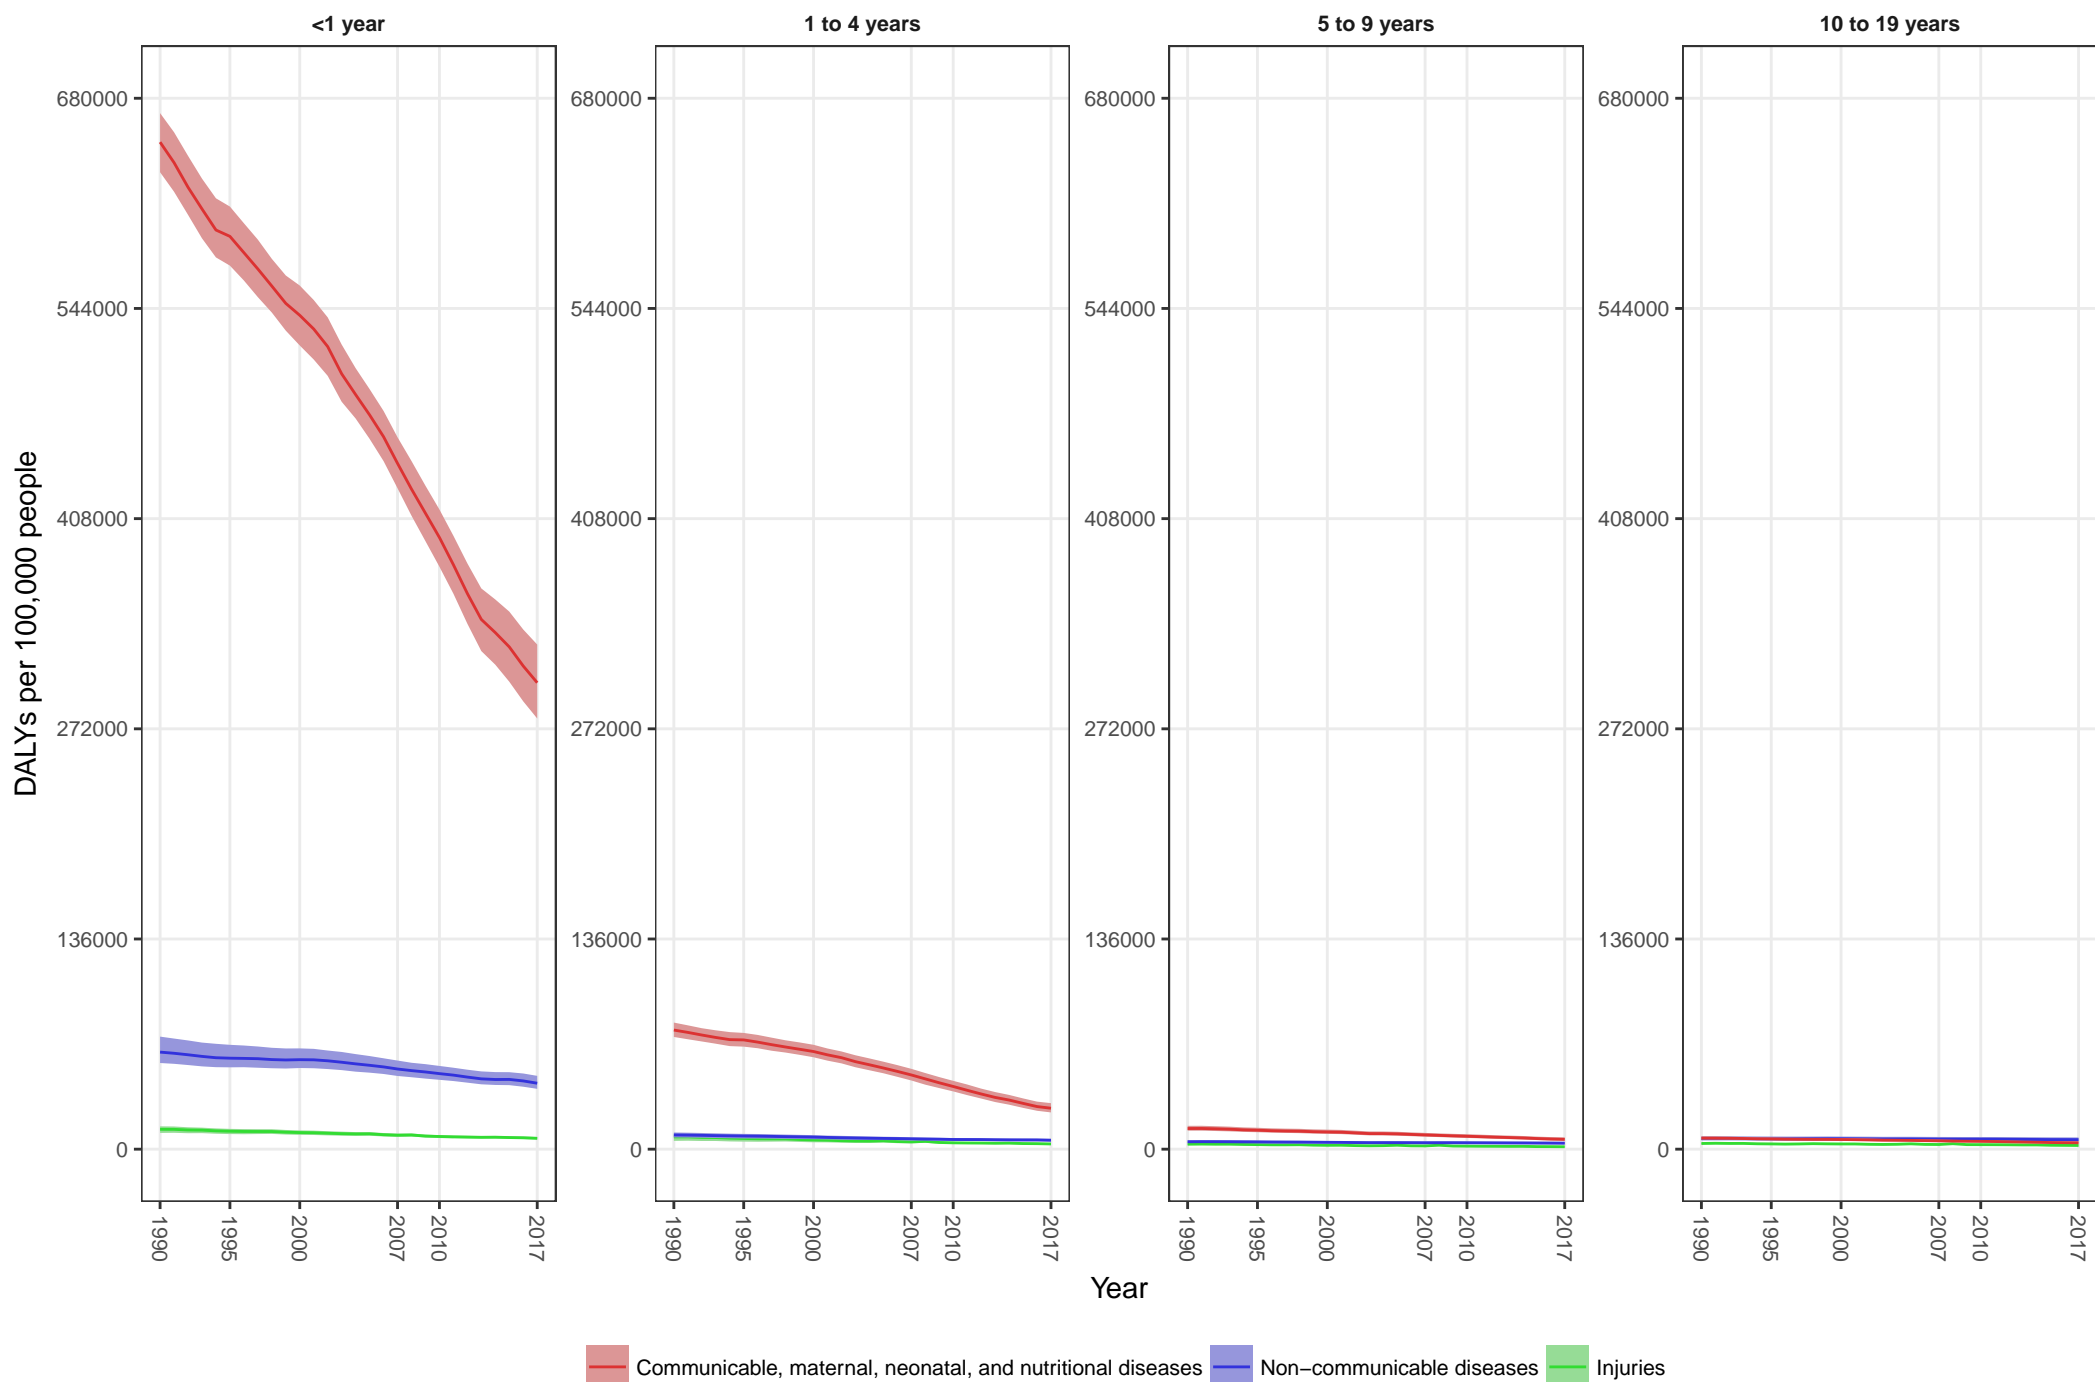

Temporal trends in disability adjusted life years (DALYs) are plotted across age groups globally and for each socio-demographic index (SDI) quintile. Panel a) global; panel b) low SDI; panel c) low-middle SDI; panel d) middle SDI; panel e) high-middle SDI; panel f) high SDI. Within each panel, trends for children less than 1 are plotted in left sub-panel, between 1 and 4 in the second sub-panel, between 5 and 9 in the third sub-panel, and between 10 and 19 in the right sub-panel. Shaded areas show 95% UIs. Communicable, maternal, neonatal, and nutritional disorders (CMNN) are shown in red, non-communicable disease (NCD) causes in blue, and injuries in green. Abbreviations: DALY=disability-adjusted life year, SDI=Socio-demographic Index.

**eFigure 4. Trends of DALYs from 1990 to 2017 by age group (<1, 1-4, 5-9, 10-19 years) for global and SDI quintiles.**

(d) Middle SDI

© 2019 GBD 2017 Child and Adolescent Health Collaborators. JAMA Pediatrics.

12

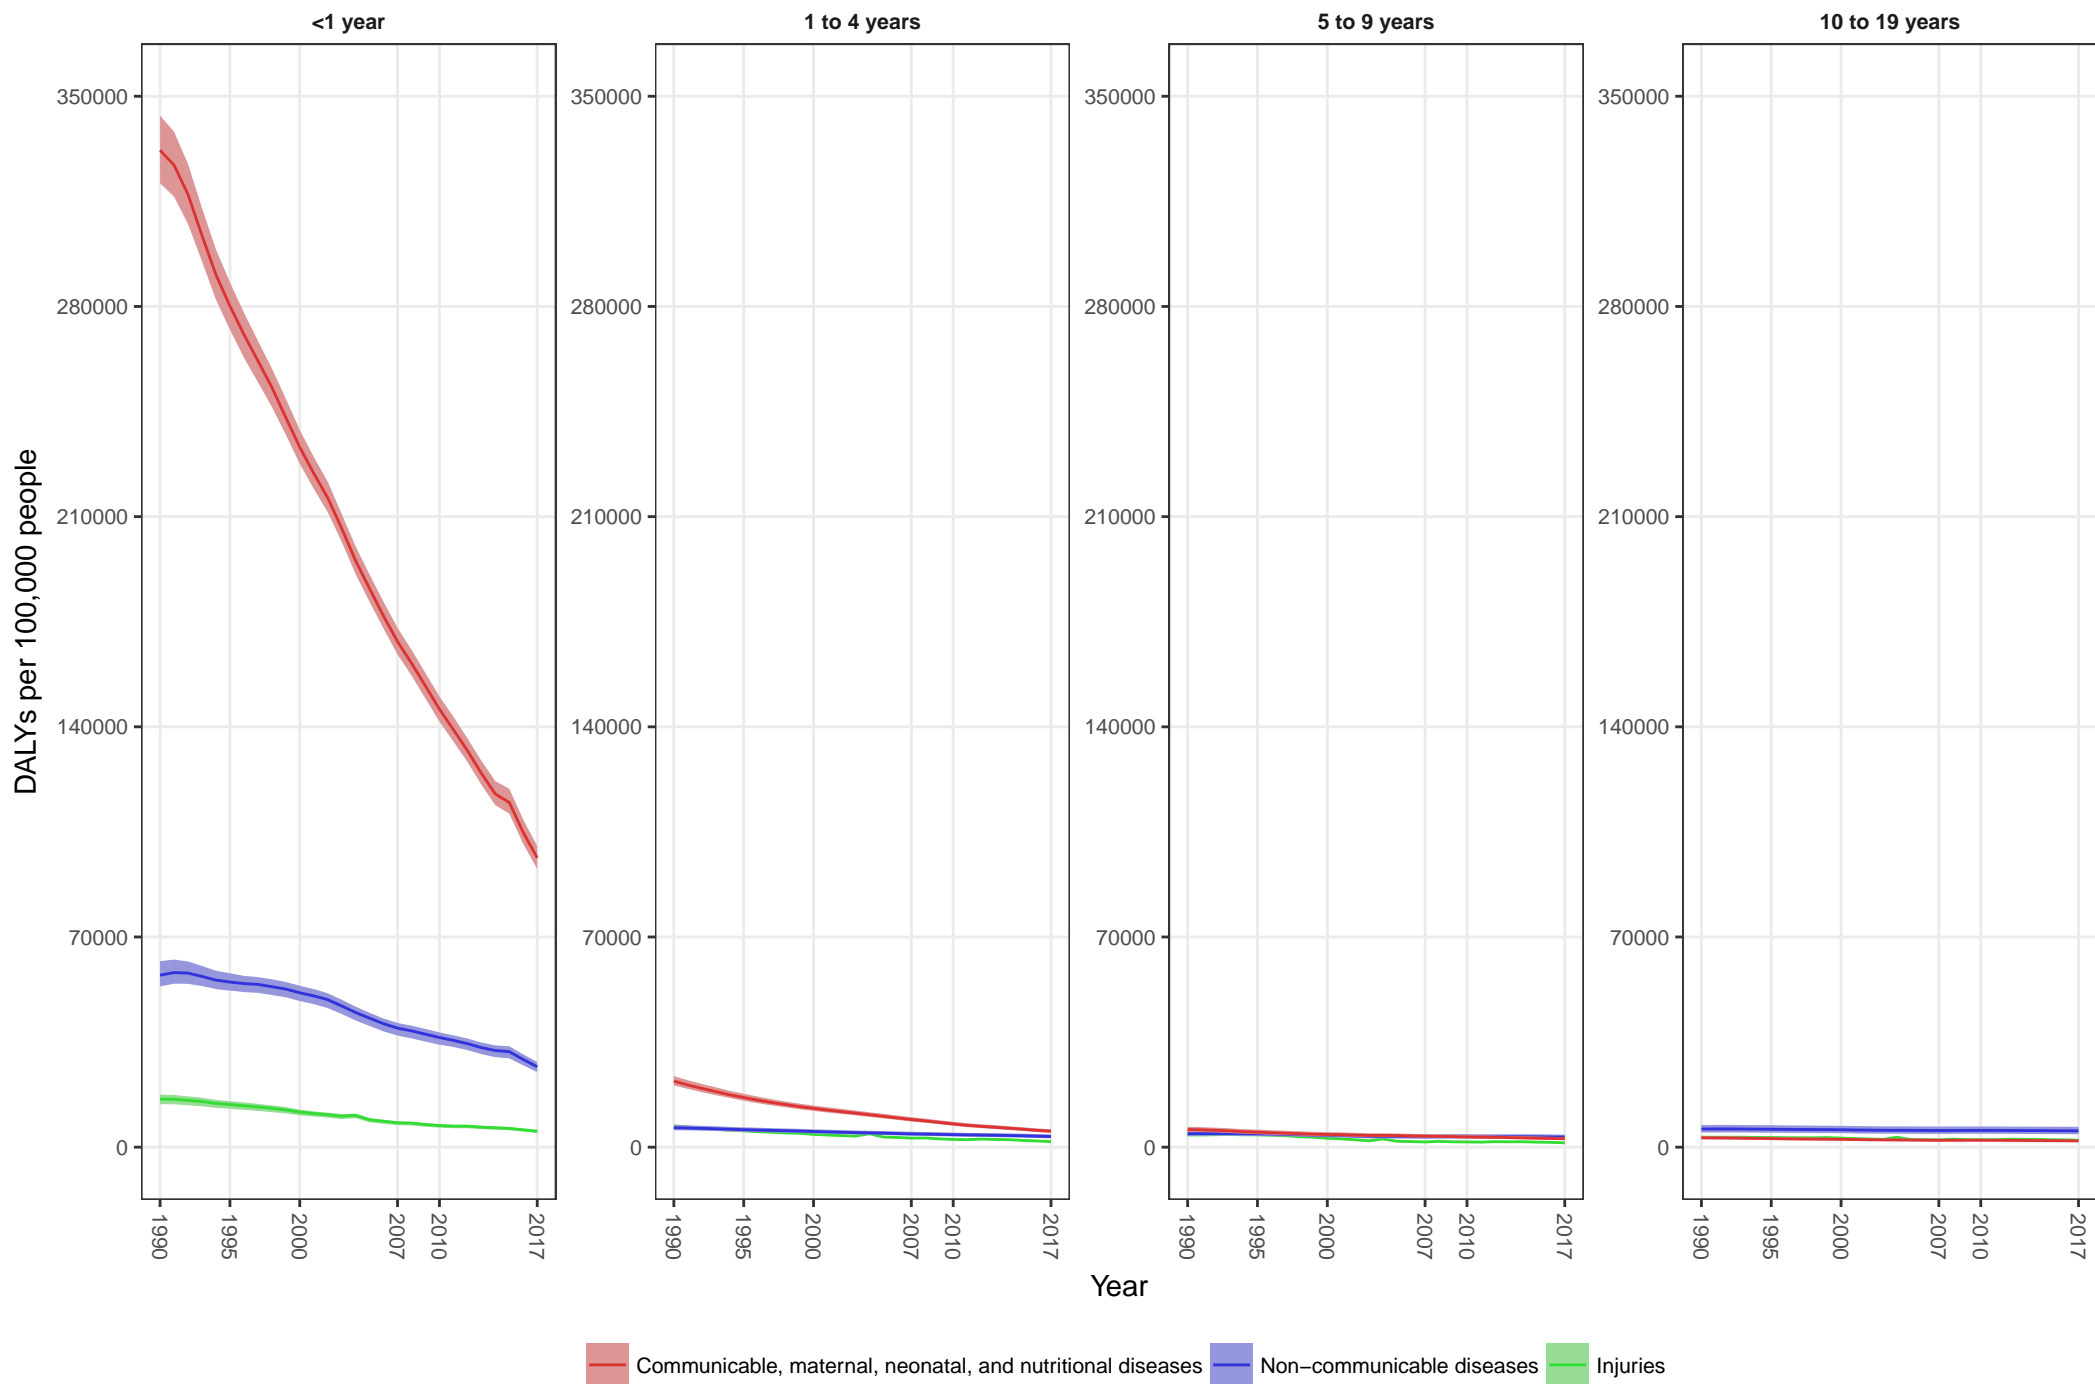

Temporal trends in disability adjusted life years (DALYs) are plotted across age groups globally and for each socio-demographic index (SDI) quintile. Panel a) global; panel b) low SDI; panel c) low-middle SDI; panel d) middle SDI; panel e) high-middle SDI; panel f) high SDI. Within each panel, trends for children less than 1 are plotted in left sub-panel, between 1 and 4 in the second sub-panel, between 5 and 9 in the third sub-panel, and between 10 and 19 in the right sub-panel. Shaded areas show 95% UIs. Communicable, maternal, neonatal, and nutritional disorders (CMNN) are shown in red, non-communicable disease (NCD) causes in blue, and injuries in green. Abbreviations: DALY=disability-adjusted life year, SDI=Socio-demographic Index.

**eFigure 4. Trends of DALYs from 1990 to 2017 by age group (<1, 1-4, 5-9, 10-19 years) for global and SDI quintiles.**

(e) High-middle SDI

© 2019 GBD 2017 Child and Adolescent Health Collaborators. JAMA Pediatrics.

13

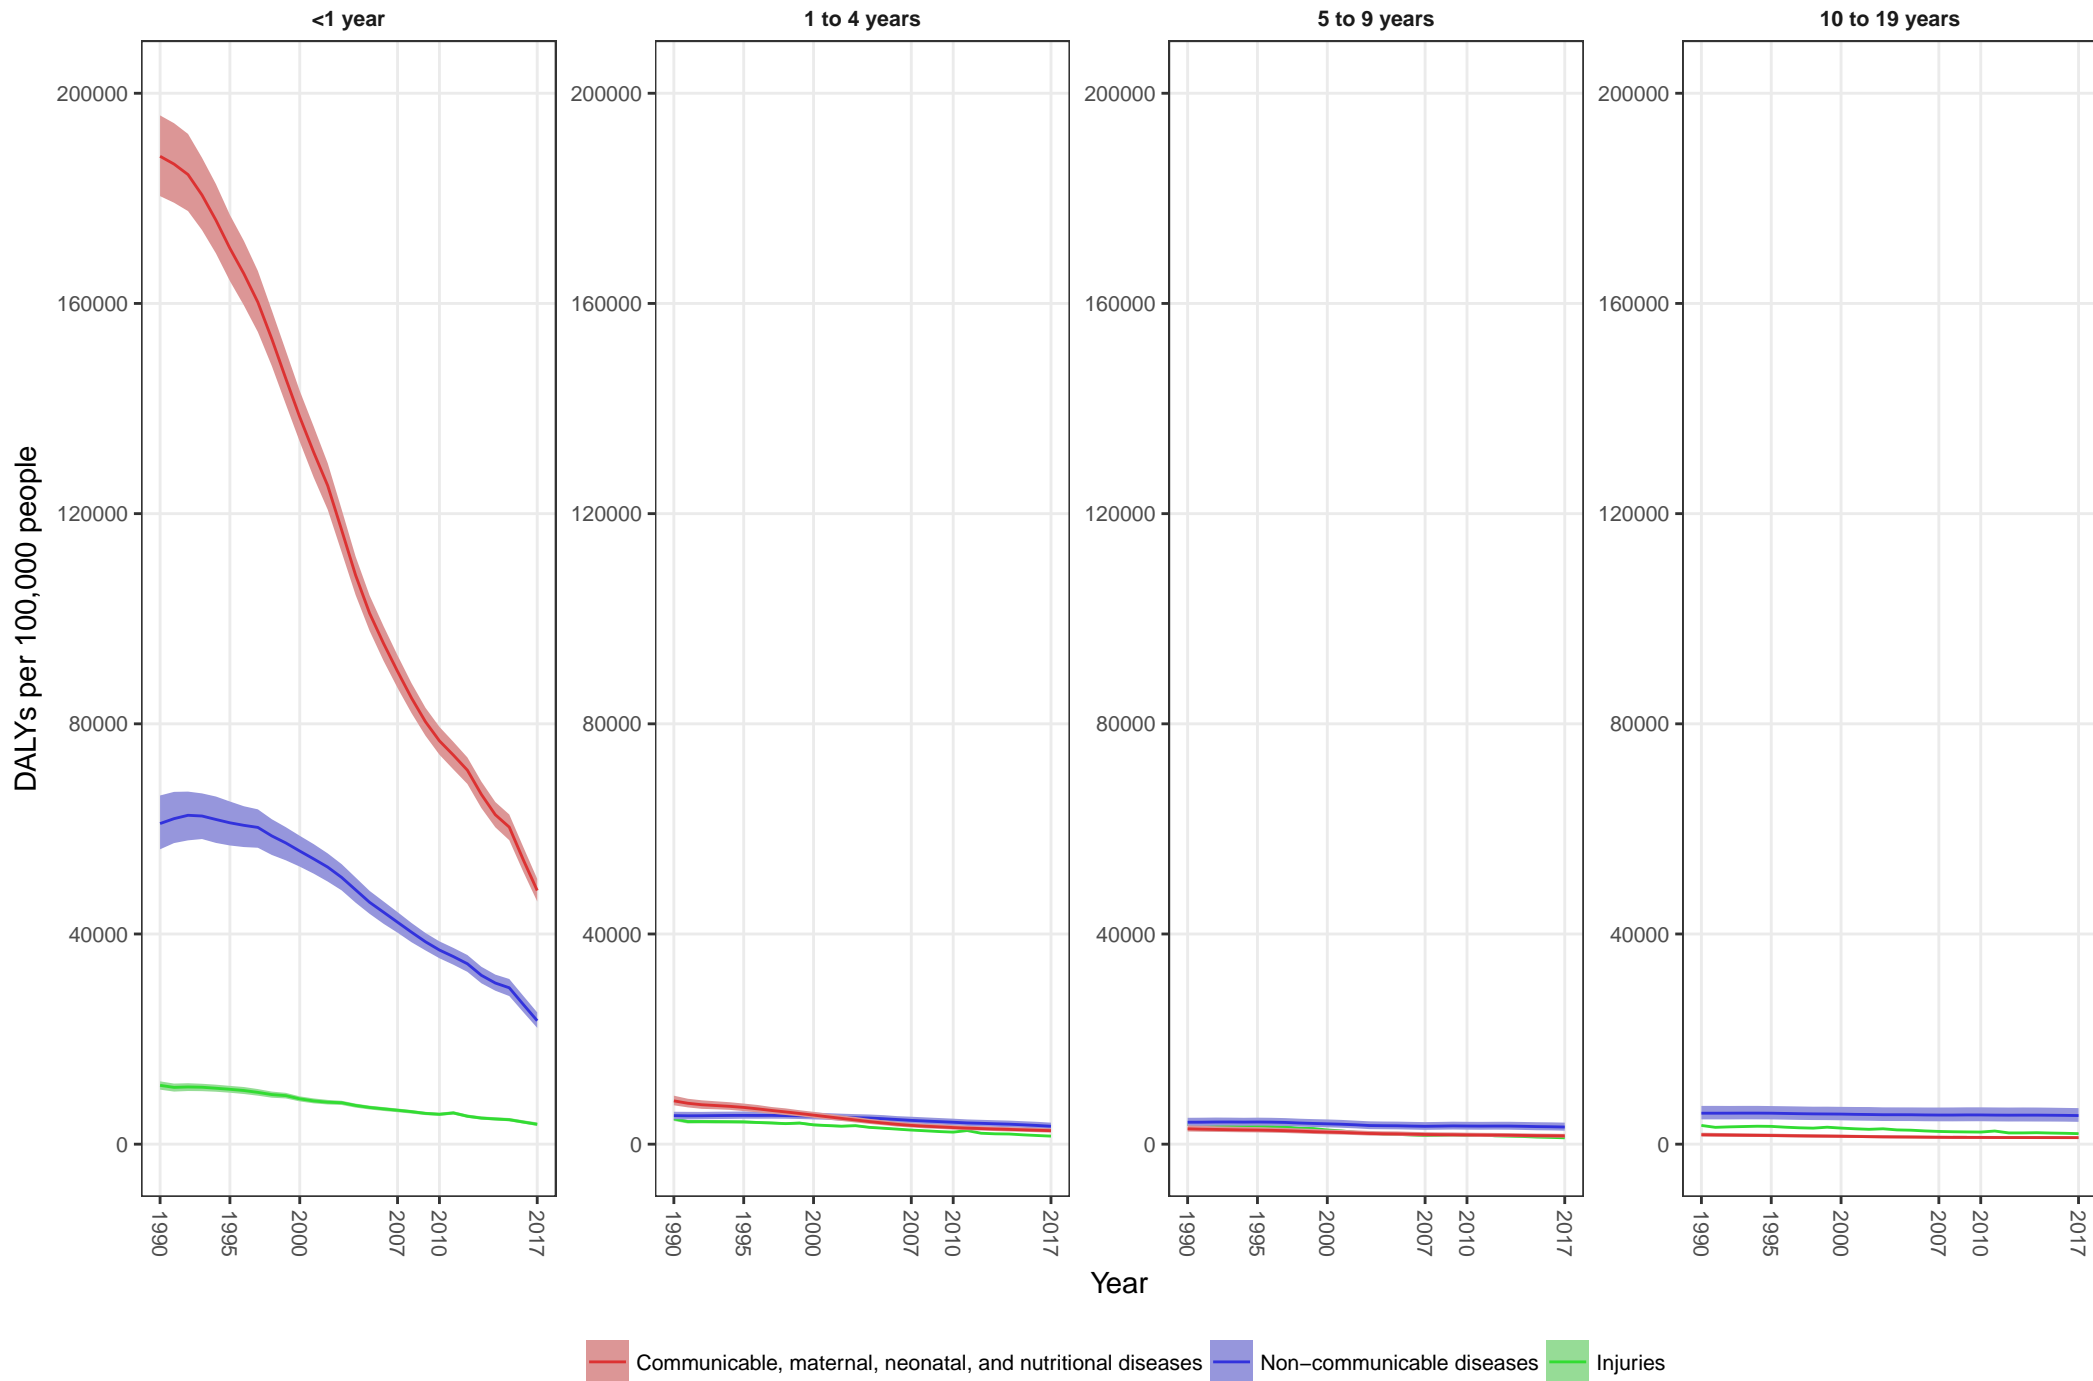

Temporal trends in disability adjusted life years (DALYs) are plotted across age groups globally and for each socio-demographic index (SDI) quintile. Panel a) global; panel b) low SDI; panel c) low-middle SDI; panel d) middle SDI; panel e) high-middle SDI; panel f) high SDI. Within each panel, trends for children less than 1 are plotted in left sub-panel, between 1 and 4 in the second sub-panel, between 5 and 9 in the third sub-panel, and between 10 and 19 in the right sub-panel. Shaded areas show 95% UIs. Communicable, maternal, neonatal, and nutritional disorders (CMNN) are shown in red, non-communicable disease (NCD) causes in blue, and injuries in green. Abbreviations: DALY=disability-adjusted life year, SDI=Socio-demographic Index.

**eFigure 4. Trends of DALYs from 1990 to 2017 by age group (<1, 1-4, 5-9, 10-19 years) for global and SDI quintiles.**

(f) High SDI

© 2019 GBD 2017 Child and Adolescent Health Collaborators. JAMA Pediatrics.

14

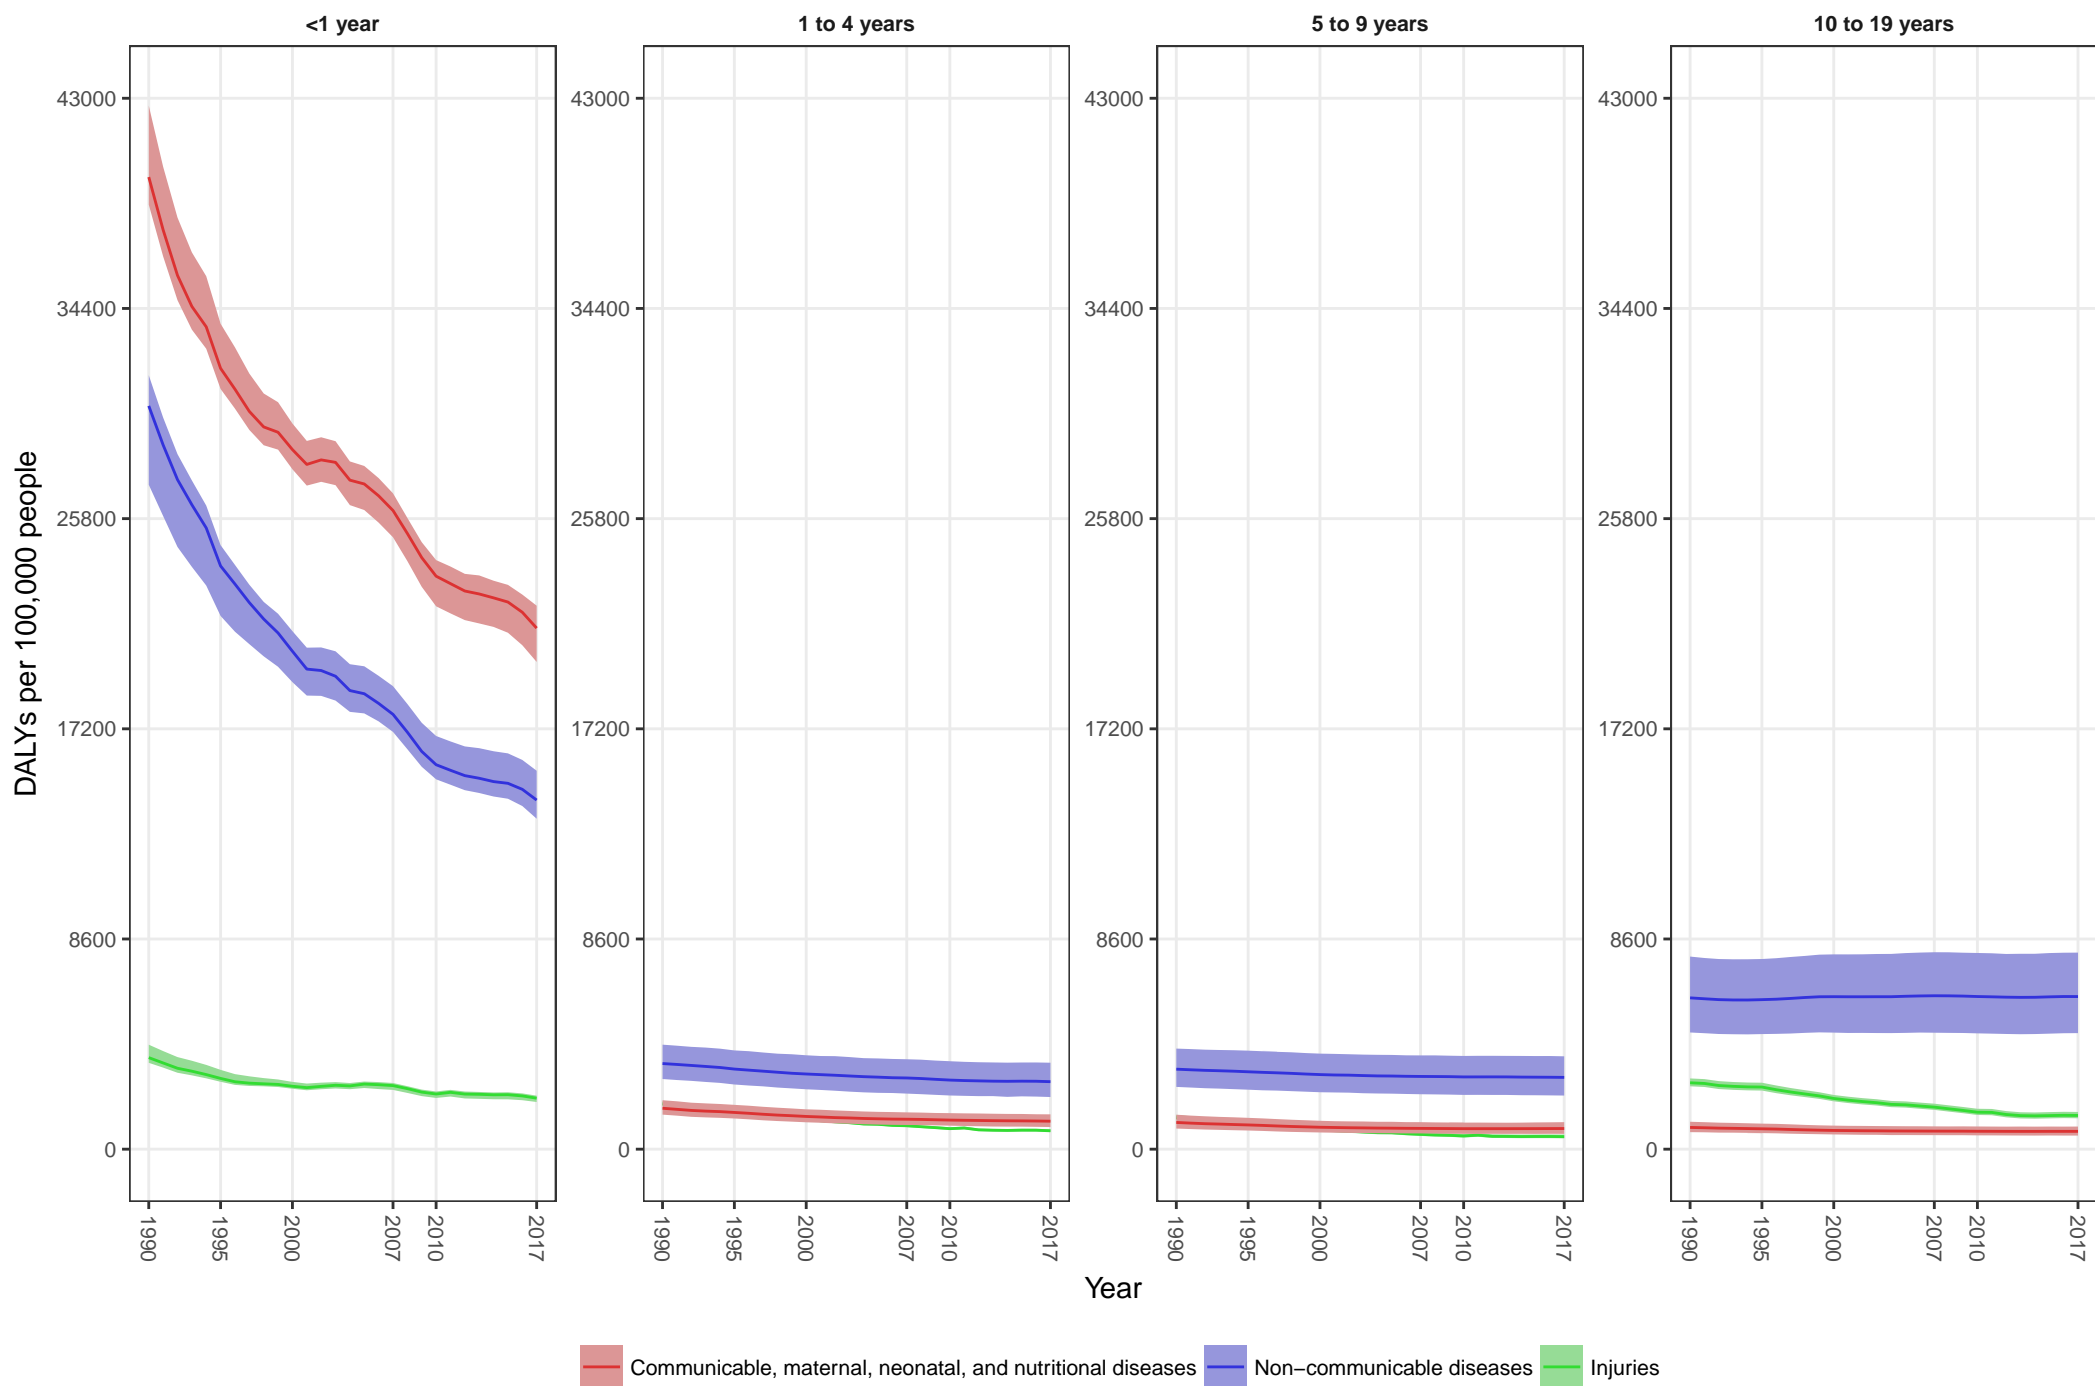

Temporal trends in disability adjusted life years (DALYs) are plotted across age groups globally and for each socio-demographic index (SDI) quintile. Panel a) global; panel b) low SDI; panel c) low-middle SDI; panel d) middle SDI; panel e) high-middle SDI; panel f) high SDI. Within each panel, trends for children less than 1 are plotted in left sub-panel, between 1 and 4 in the second sub-panel, between 5 and 9 in the third sub-panel, and between 10 and 19 in the right sub-panel. Shaded areas show 95% UIs. Communicable, maternal, neonatal, and nutritional disorders (CMNN) are shown in red, non-communicable disease (NCD) causes in blue, and injuries in green. Abbreviations: DALY=disability-adjusted life year, SDI=Socio-demographic Index.

eFigure 5a: Map of percent change for observed to expected (O:E) all-cause DALY rates from 1990 to 2000, 2000 to 2017 for <1, 1–4, 5–9, 10–19 years

© 2019 GBD 2017 Child and Adolescent Health Collaborators. JAMA Pediatrics.

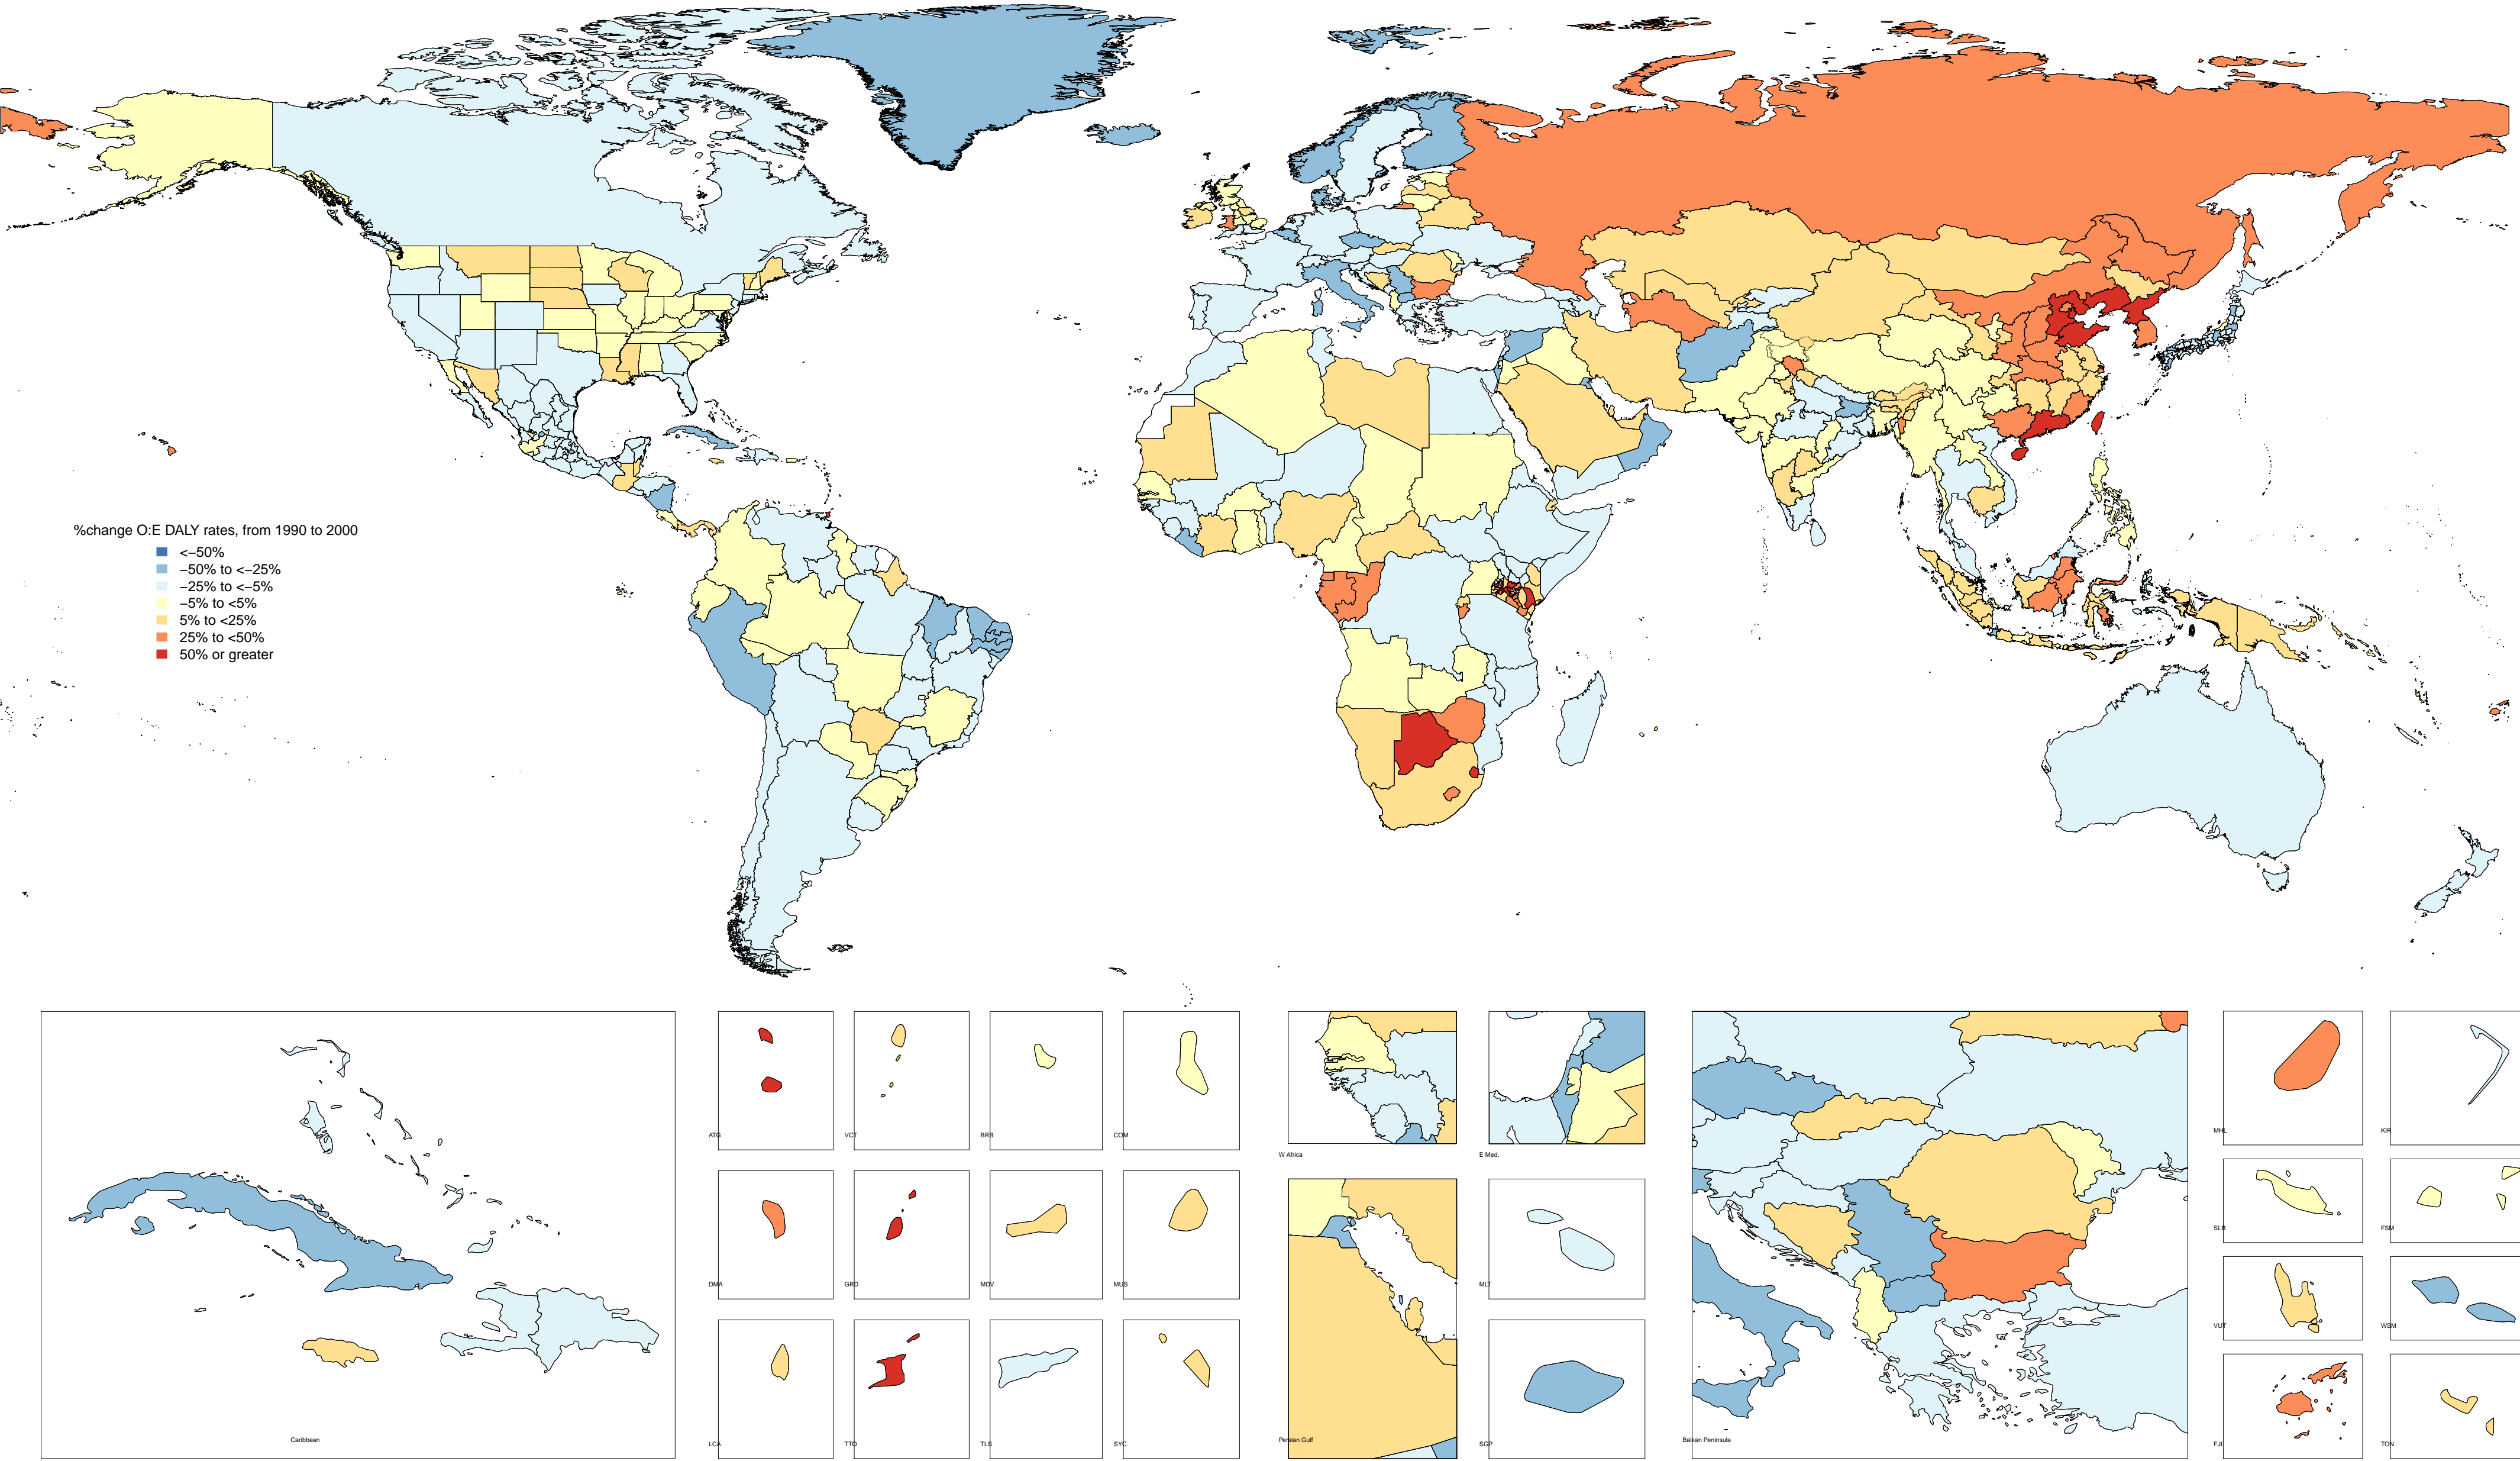

Percent changes in observed to expected disability-adjusted life years (DALYs) are plotted for different time periods and age groups. Panels A-D display changes from 1990 to 2000. Panels E-H display changes from 2000 to 2017. Panels A and E show changes for children less than 1; panels B and F show changes for children between 1 and 4; panels C and G show changes for children between 5 and 9; and panels D and H show changes for children between 10 and 19. For all plots, both sexes are combined. Subnational differentiation occurs within each country GBD models at the subnational level. Inset plots provided for detailed inspection of small or clustered regions. Abbreviations: DALY=disability-adjusted life year, GBD=Global Burden of Disease, ATG = Antigua and Barbuda, DMA = Dominica, LCA = Saint Lucia, VCT = Saint Vincent and the Grenadines, GRD = Grenada, TTO = Trinidad and Tobago, BRB = Barbados, MDV = Maldives, TLS = Timor-Leste, COM = Comoros, MUS = Mauritius, SYC = Seychelles, MLT = Malta, SGP = Singapore, MHL = Marshall Islands, SLB = Solomon Islands, VUT = Vanuatu, FJI = Fiji, KIR = Kiribati, FSM = Federated States of Micronesia, WSM = Samoa, TON = Tonga

eFigure 5b: Map of percent change for observed to expected (O:E) all-cause DALY rates from 1990 to 2000, 2000 to 2017 for <1, 1–4, 5–9, 10–19 years

© 2019 GBD 2017 Child and Adolescent Health Collaborators. JAMA Pediatrics.

16

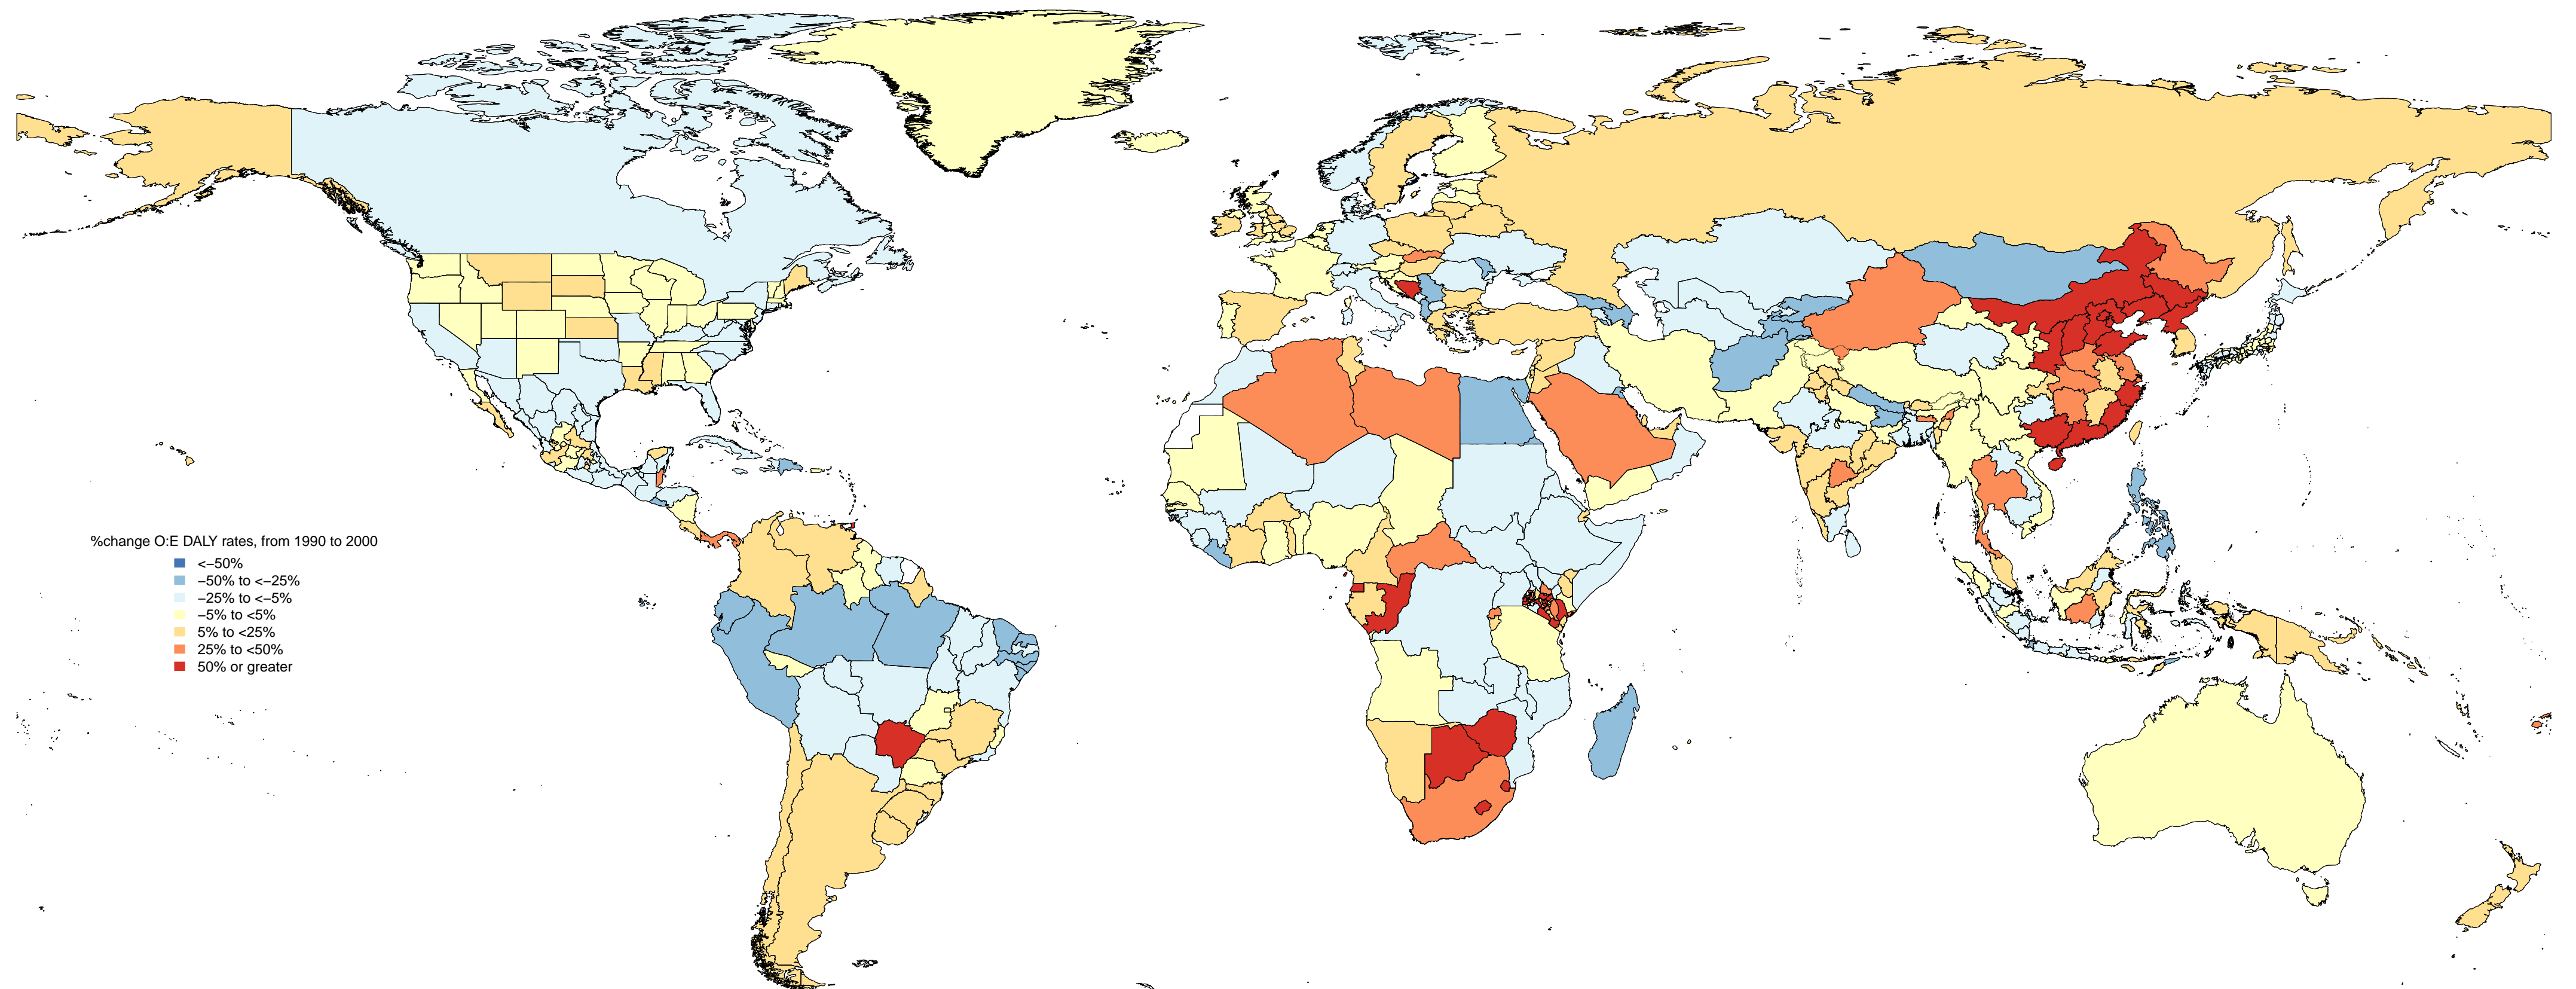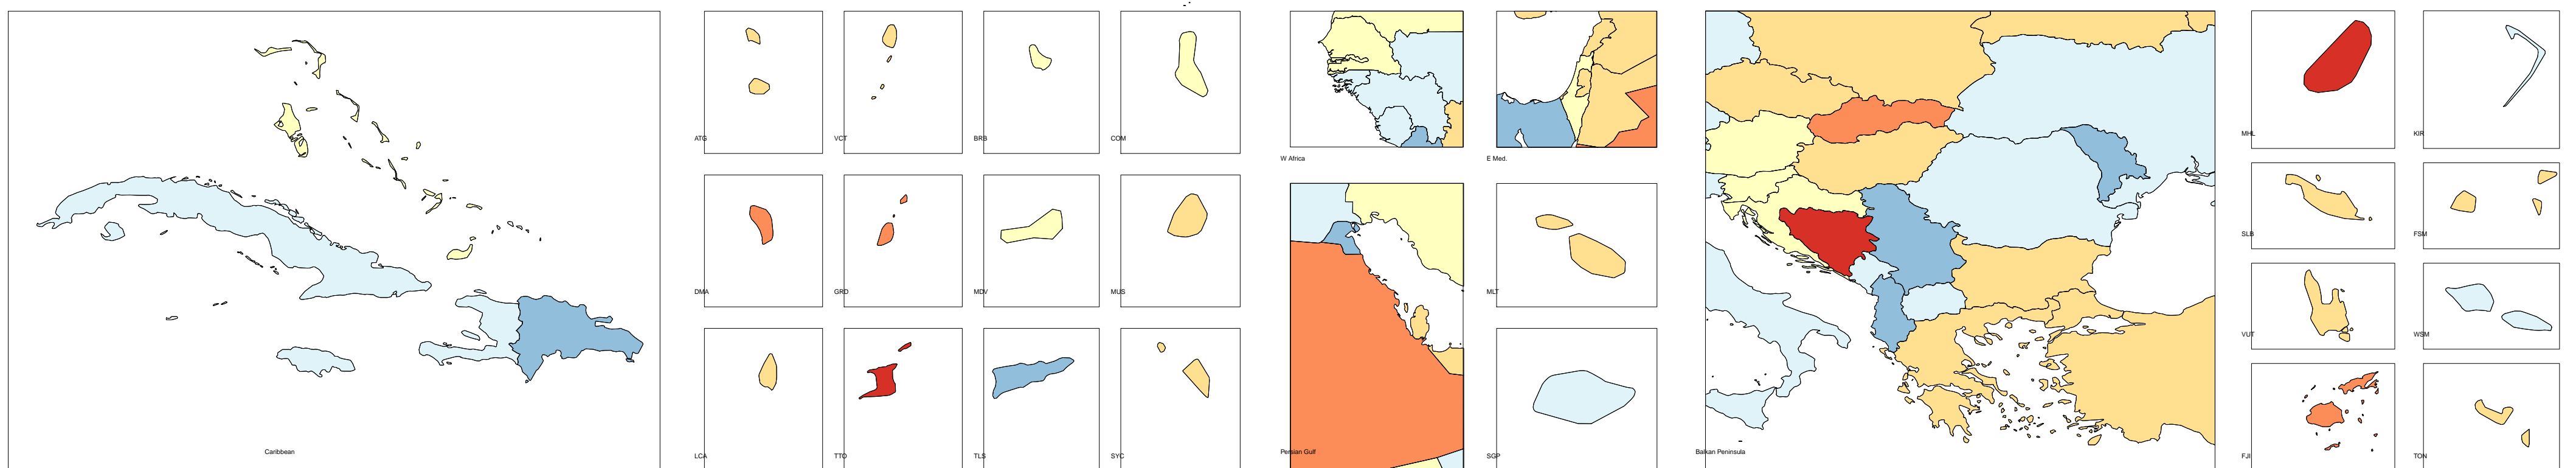

Percent changes in observed to expected disability-adjusted life years (DALYs) are plotted for different time periods and age groups. Panels A-D display changes from 1990 to 2000. Panels E-H display changes from 2000 to 2017. Panels A and E show changes for children less than 1; panels B and F show changes for children between 1 and 4; panels C and G show changes for children between 5 and 9; and panels D and H show changes for children between 10 and 19. For all plots, both sexes are combined. Subnational differentiation occurs within each country GBD models at the subnational level. Inset plots provided for detailed inspection of small or clustered regions. Abbreviations: DALY=disability-adjusted life year, GBD=Global Burden of Disease, ATG = Antigua and Barbuda, DMA = Dominica, LCA = Saint Lucia, VCT = Saint Vincent and the Grenadines, GRD = Grenada, TTO = Trinidad and Tobago, BRB = Barbados, MDV = Maldives, TLS = Timor-Leste, COM = Comoros, MUS = Mauritius, SYC = Seychelles, MLT = Malta, SGP = Singapore, MHL = Marshall Islands, SLB = Solomon Islands, VUT = Vanuatu, FJI = Fiji, KIR = Kiribati, FSM = Federated States of Micronesia, WSM = Samoa, TON = Tonga

**eFigure 5c: Map of percent change for observed to expected (O:E) all-cause DALY rates from 1990 to 2000, 2000 to 2017 for <1, 1–4, 5–9, 10–19 years**

© 2019 GBD 2017 Child and Adolescent Health Collaborators. JAMA Pediatrics.

17

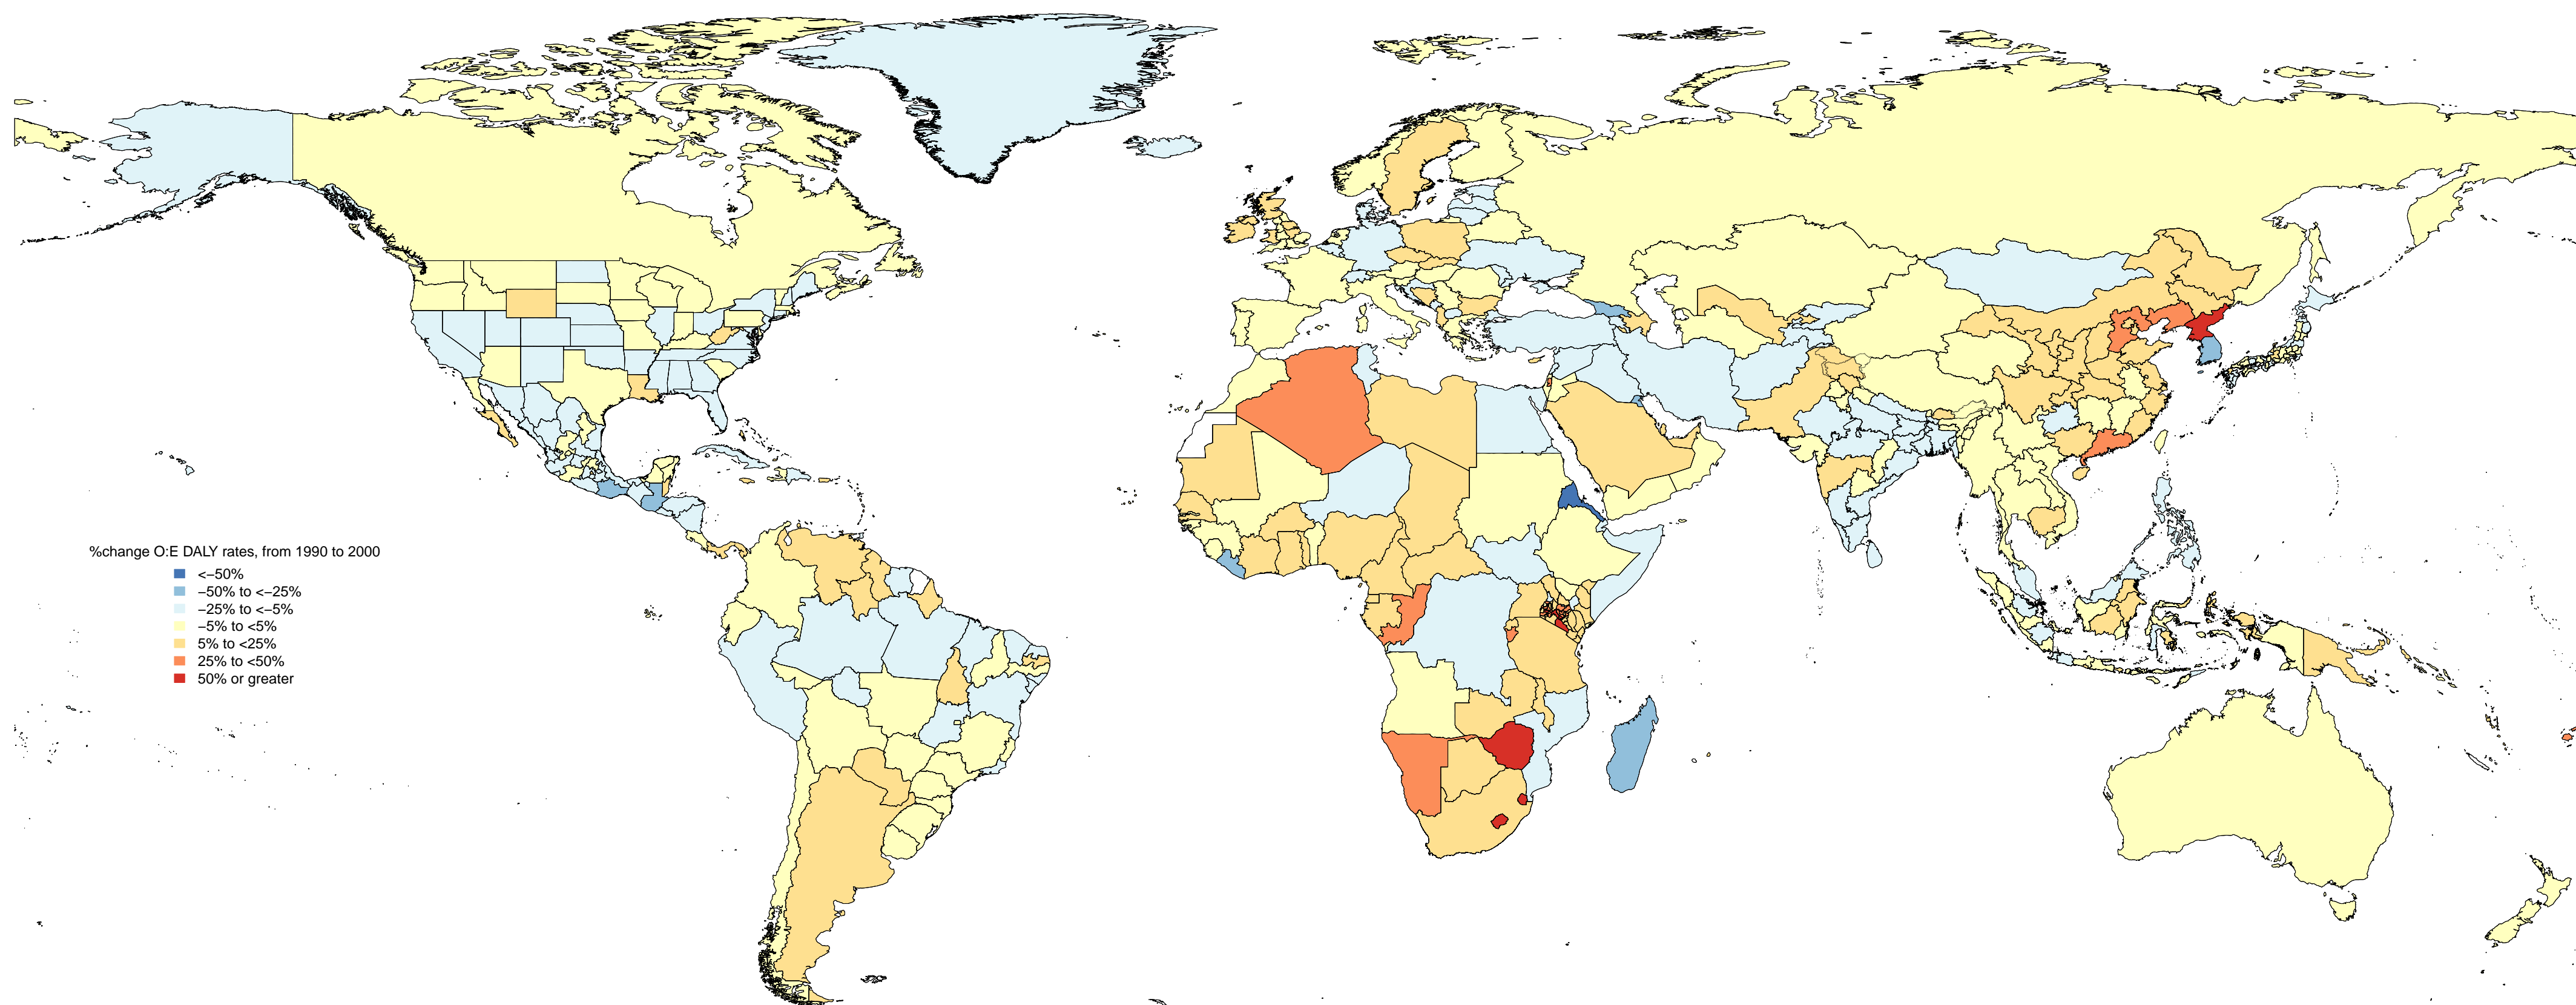

%change O:E DALY rates, from 1990 to 2000

- <-50%
- -50% to <-25%
- -25% to <-5%
- -5% to <5%
- 5% to <25%
- 25% to <50%
- 50% or greater

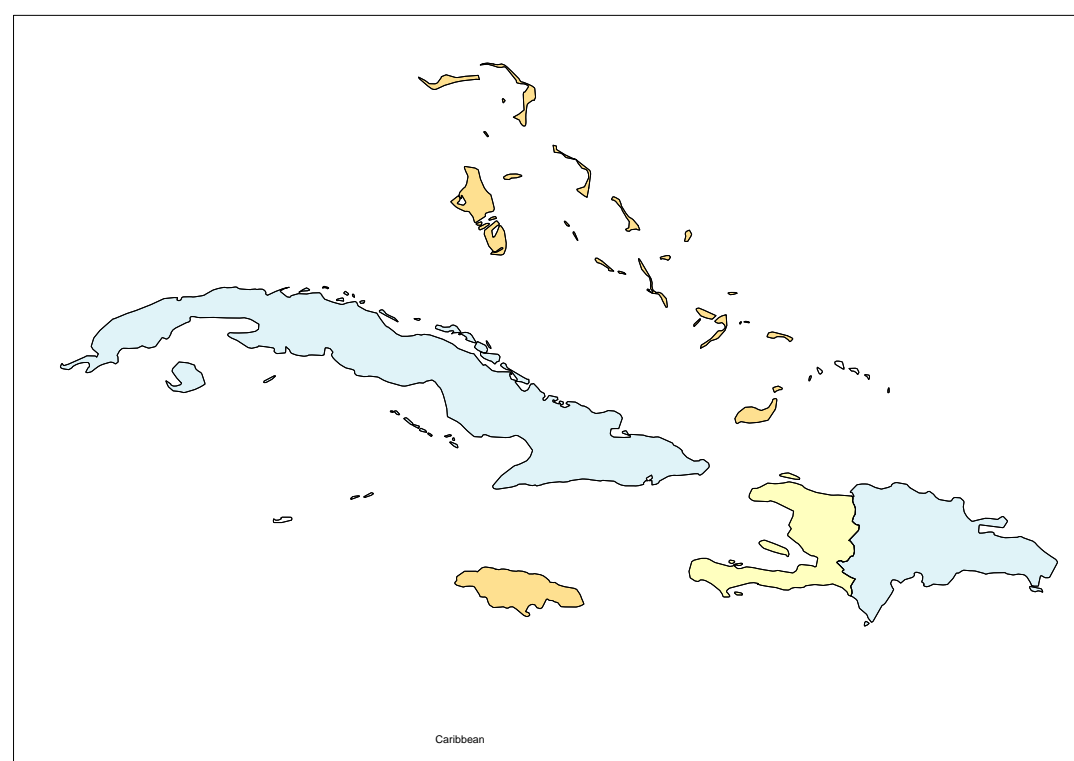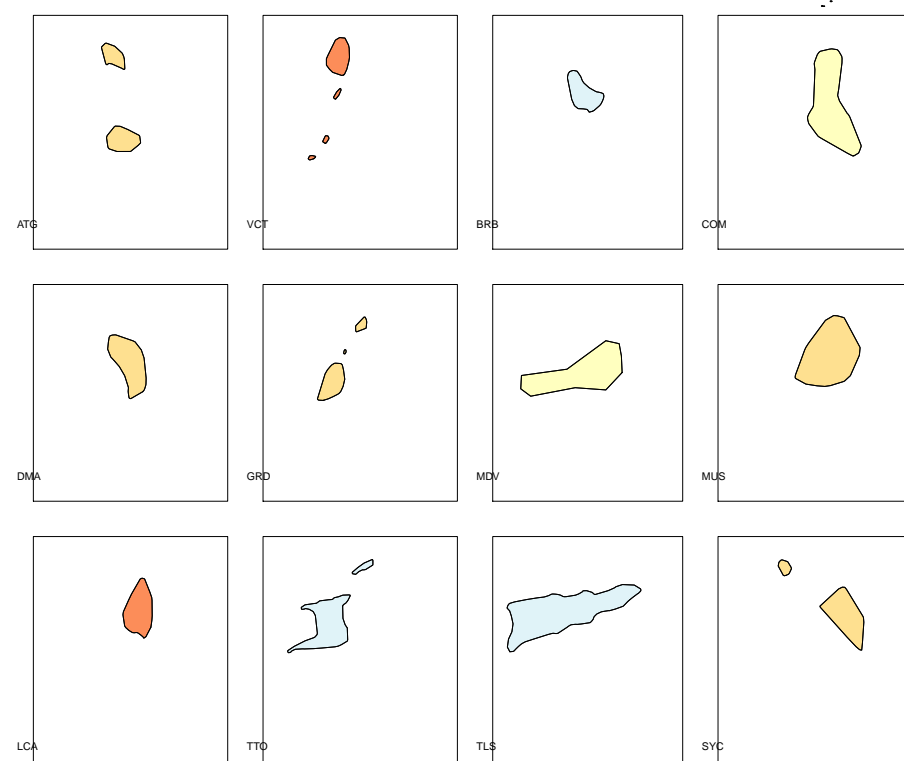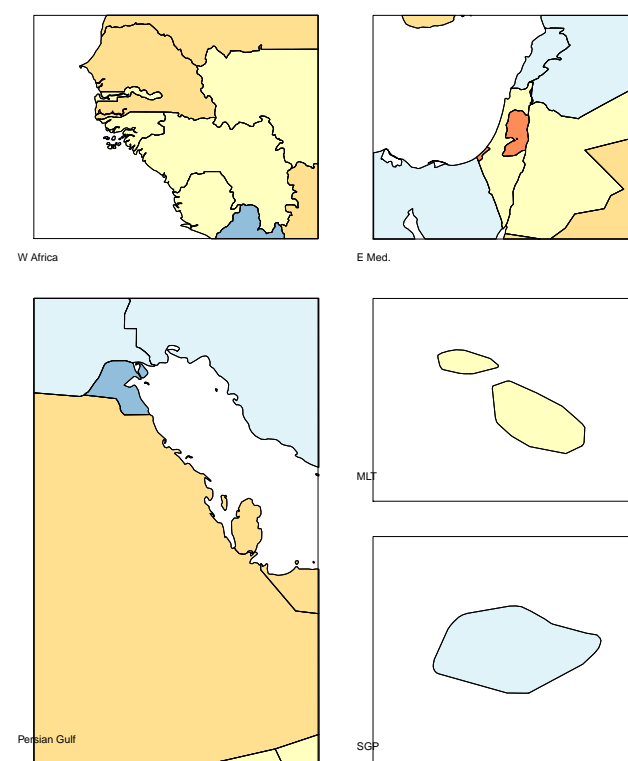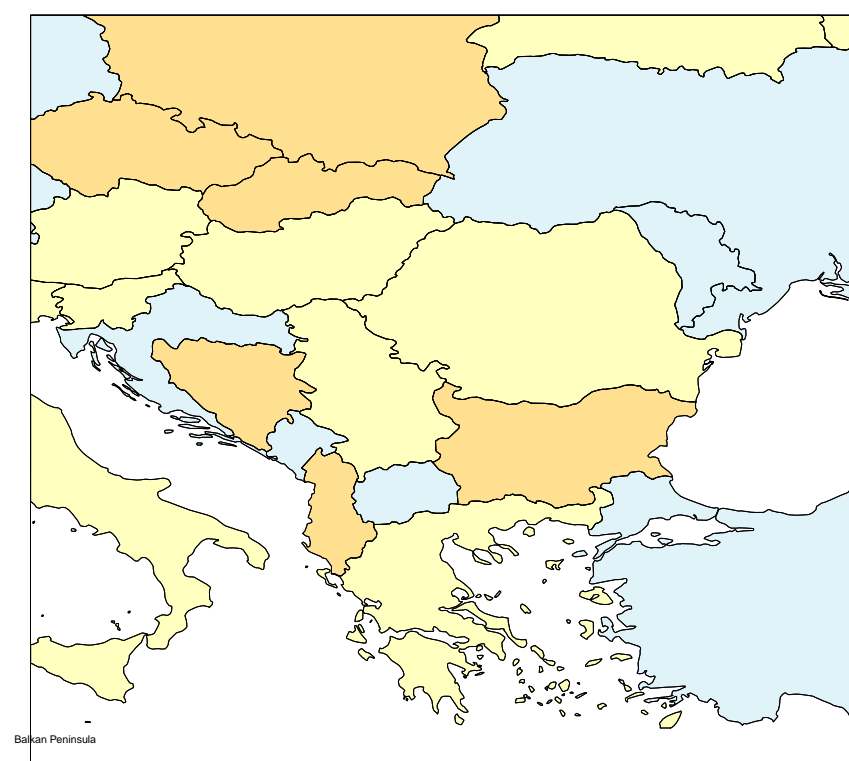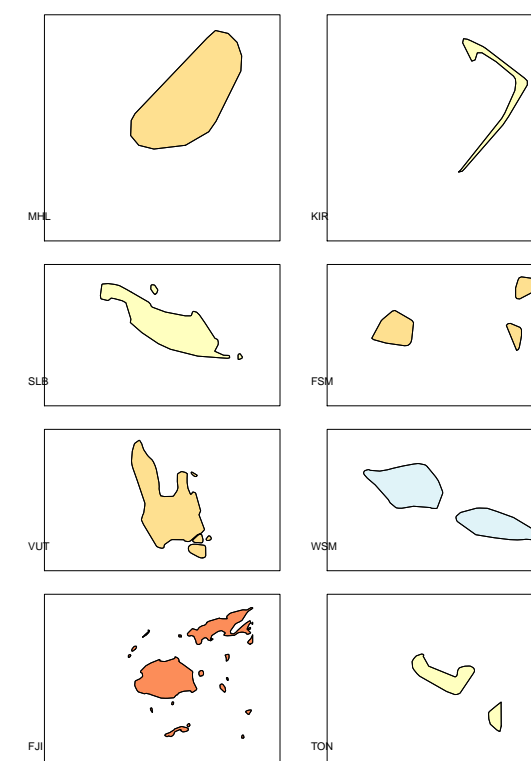

Percent changes in observed to expected disability-adjusted life years (DALYs) are plotted for different time periods and age groups. Panels A-D display changes from 1990 to 2000. Panels E-H display changes from 2000 to 2017. Panels A and E show changes for children less than 1; panels B and F show changes for children between 1 and 4; panels C and G show changes for children between 5 and 9; and panels D and H show changes for children between 10 and 19. For all plots, both sexes are combined. Subnational differentiation occurs within each country GBD models at the subnational level. Inset plots provided for detailed inspection of small or clustered regions. Abbreviations: DALY=disability-adjusted life year, GBD=Global Burden of Disease, ATG = Antigua and Barbuda, DMA = Dominica, LCA = Saint Lucia, VCT = Saint Vincent and the Grenadines, GRD = Grenada, TTO = Trinidad and Tobago, BRB = Barbados, MDV = Maldives, TLS = Timor-Leste, COM = Comoros, MUS = Mauritius, SYC = Seychelles, MLT = Malta, SGP = Singapore, MHL = Marshall Islands, SLB = Solomon Islands, VUT = Vanuatu, FJI = Fiji, KIR = Kiribati, FSM = Federated States of Micronesia, WSM = Samoa, TON = Tonga

eFigure 5d: Map of percent change for observed to expected (O:E) all-cause DALY rates from 1990 to 2000, 2000 to 2017 for <1, 1–4, 5–9, 10–19 years

© 2019 GBD 2017 Child and Adolescent Health Collaborators. JAMA Pediatrics.

18

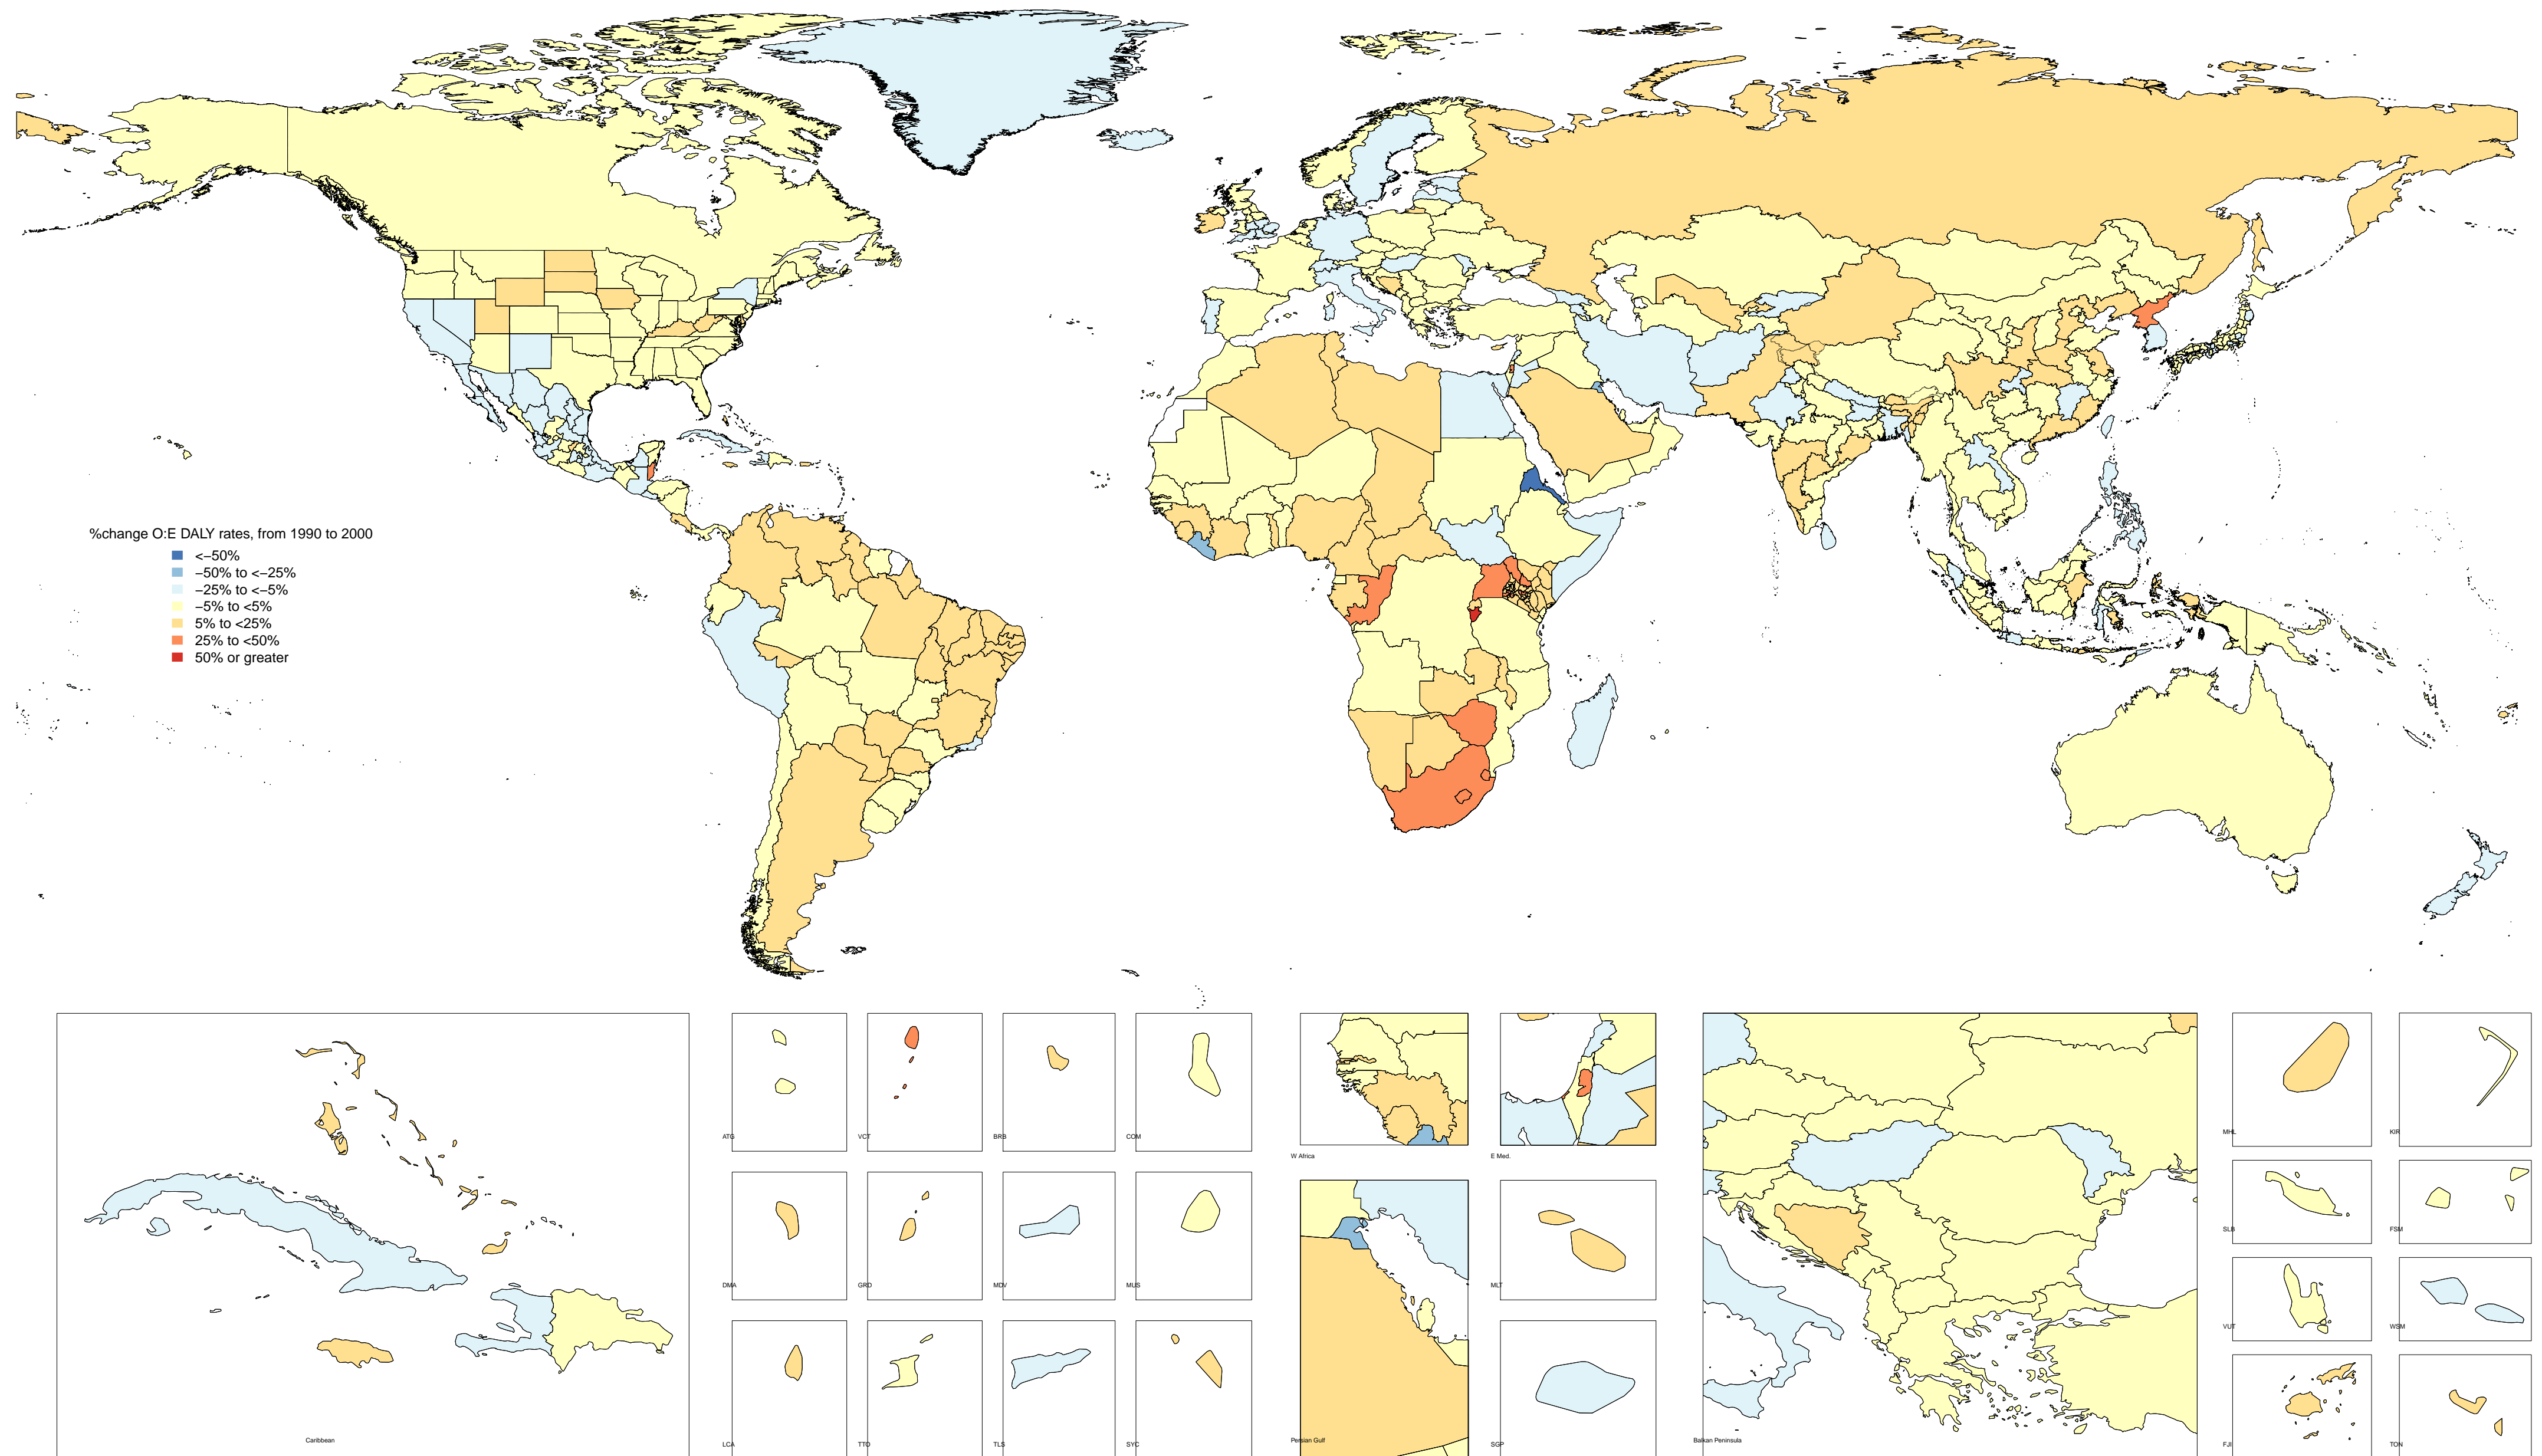

Percent changes in observed to expected disability-adjusted life years (DALYs) are plotted for different time periods and age groups. Panels A-D display changes from 1990 to 2000. Panels E-H display changes from 2000 to 2017. Panels A and E show changes for children less than 1; panels B and F show changes for children between 1 and 4; panels C and G show changes for children between 5 and 9; and panels D and H show changes for children between 10 and 19. For all plots, both sexes are combined. Subnational differentiation occurs within each country GBD models at the subnational level. Inset plots provided for detailed inspection of small or clustered regions. Abbreviations: DALY=disability-adjusted life year, GBD=Global Burden of Disease, ATG = Antigua and Barbuda, DMA = Dominica, LCA = Saint Lucia, VCT = Saint Vincent and the Grenadines, GRD = Grenada, TTO = Trinidad and Tobago, BRB = Barbados, MDV = Maldives, TLS = Timor-Leste, COM = Comoros, MUS = Mauritius, SYC = Seychelles, MLT = Malta, SGP = Singapore, MHL = Marshall Islands, SLB = Solomon Islands, VUT = Vanuatu, FJI = Fiji, KIR = Kiribati, FSM = Federated States of Micronesia, WSM = Samoa, TON = Tonga

**eFigure 5e: Map of percent change for observed to expected (O:E) all-cause DALY rates from 1990 to 2000, 2000 to 2017 for <1, 1–4, 5–9, 10–19 years**

© 2019 GBD 2017 Child and Adolescent Health Collaborators. JAMA Pediatrics.

19

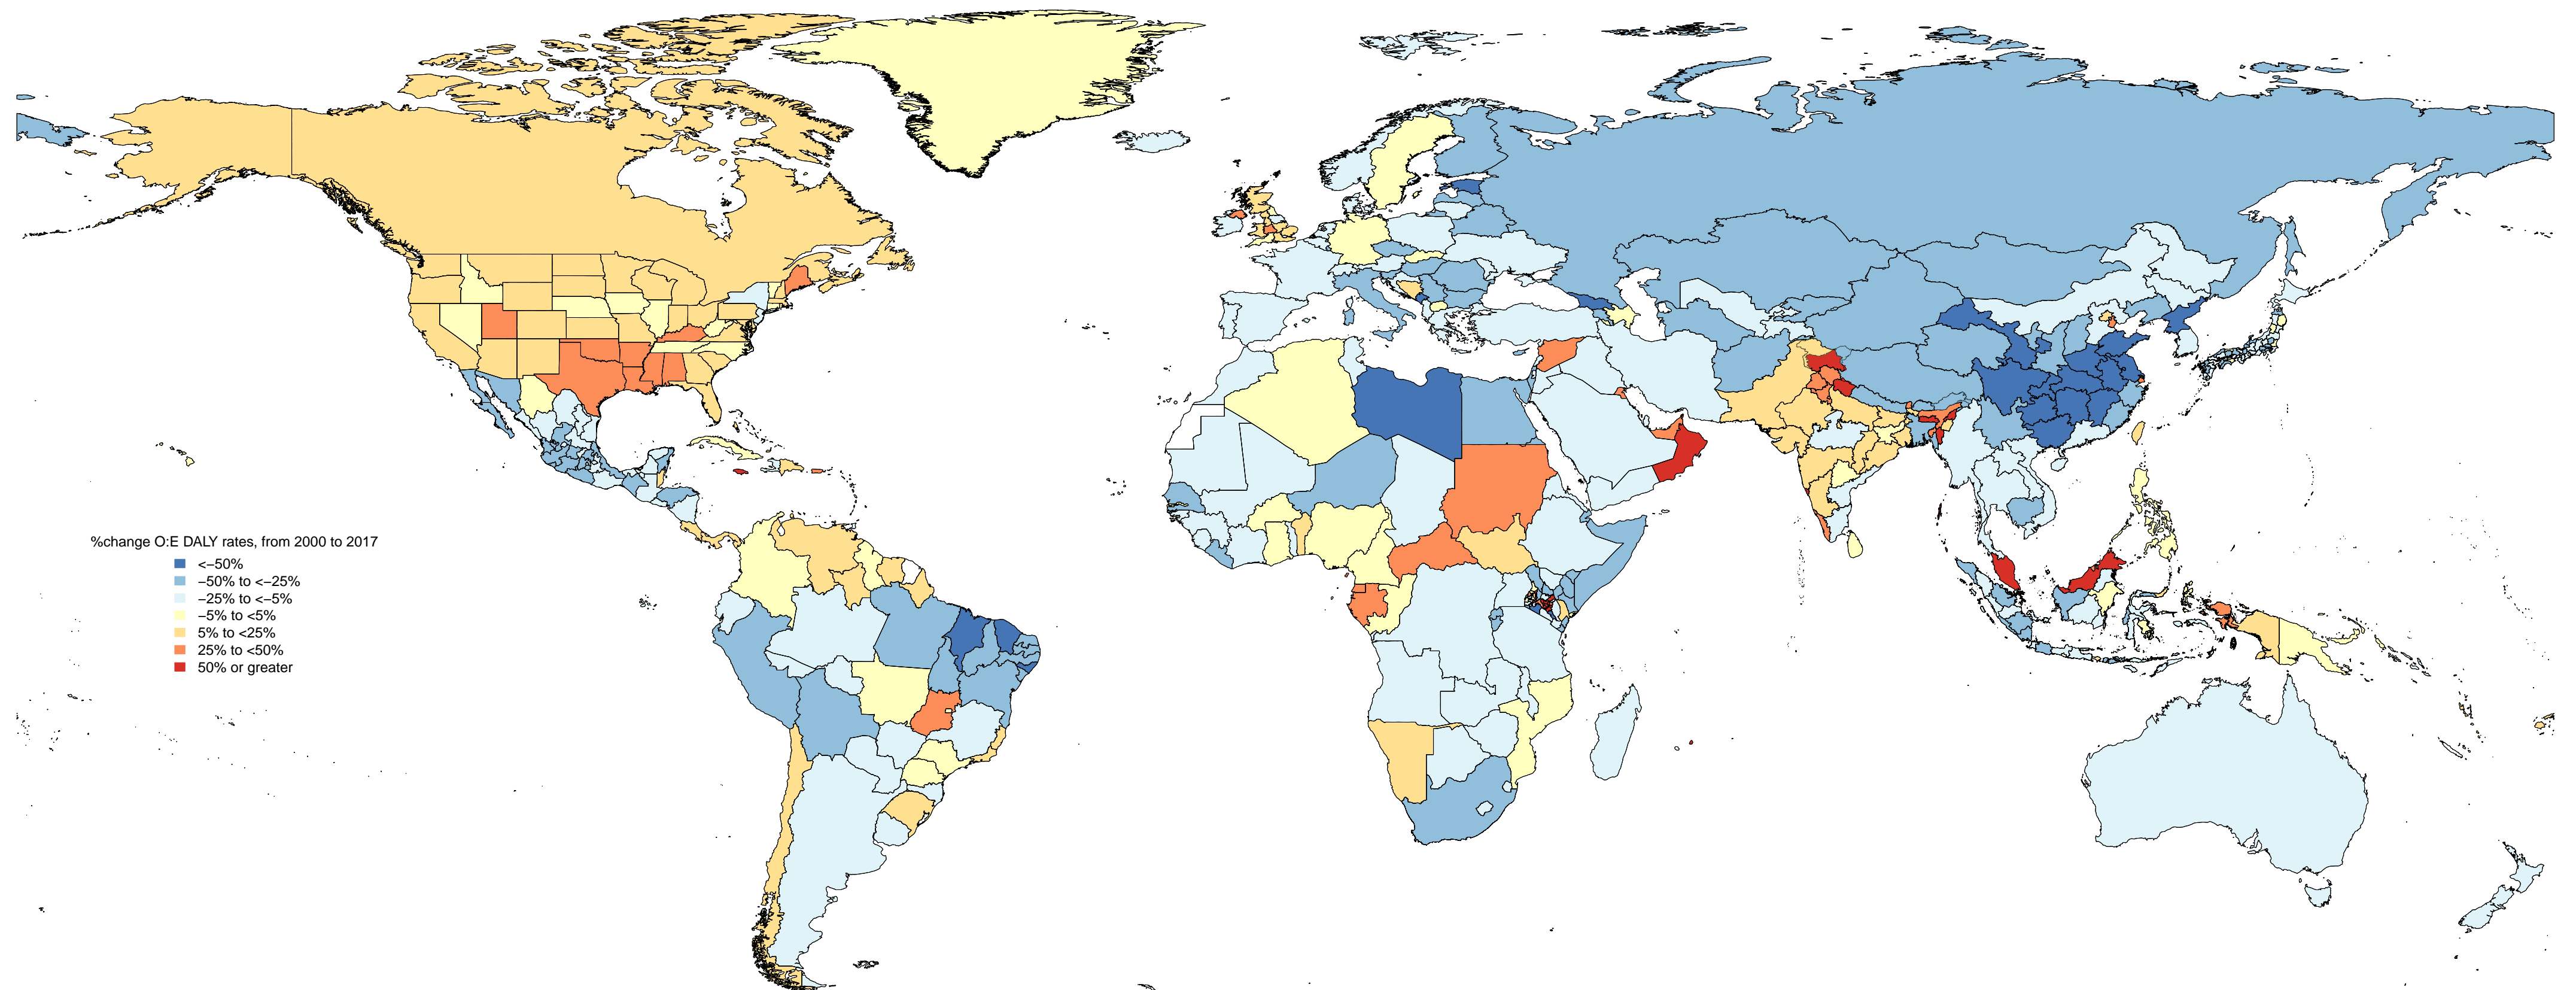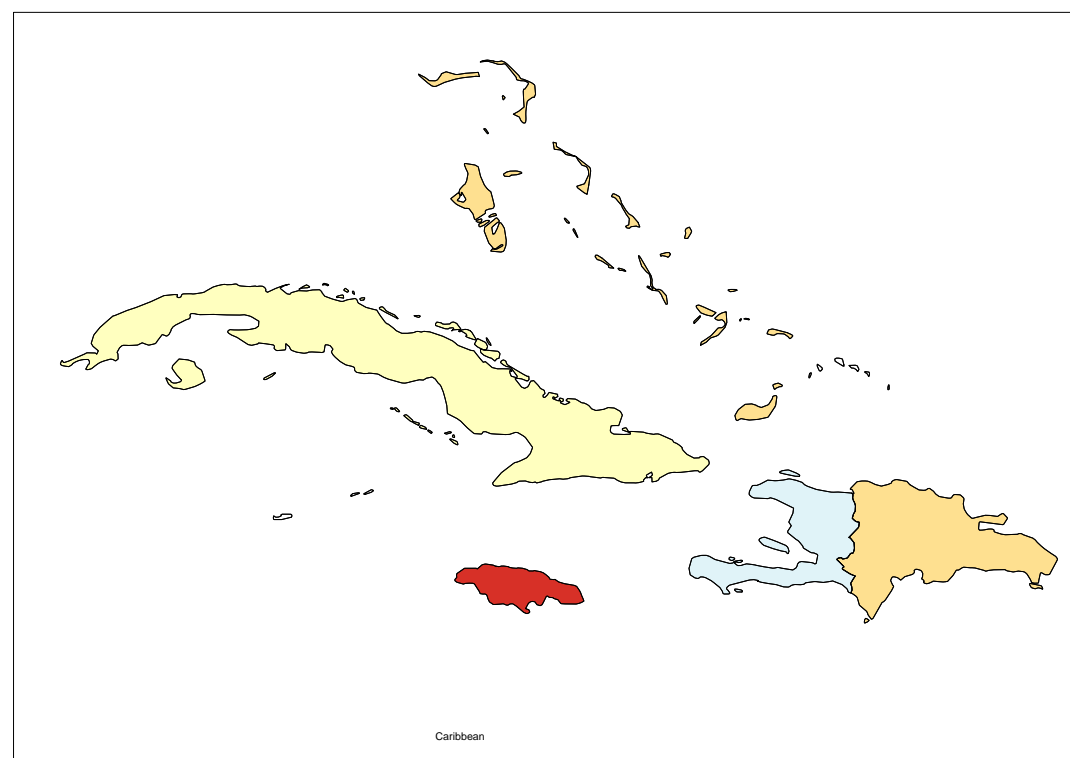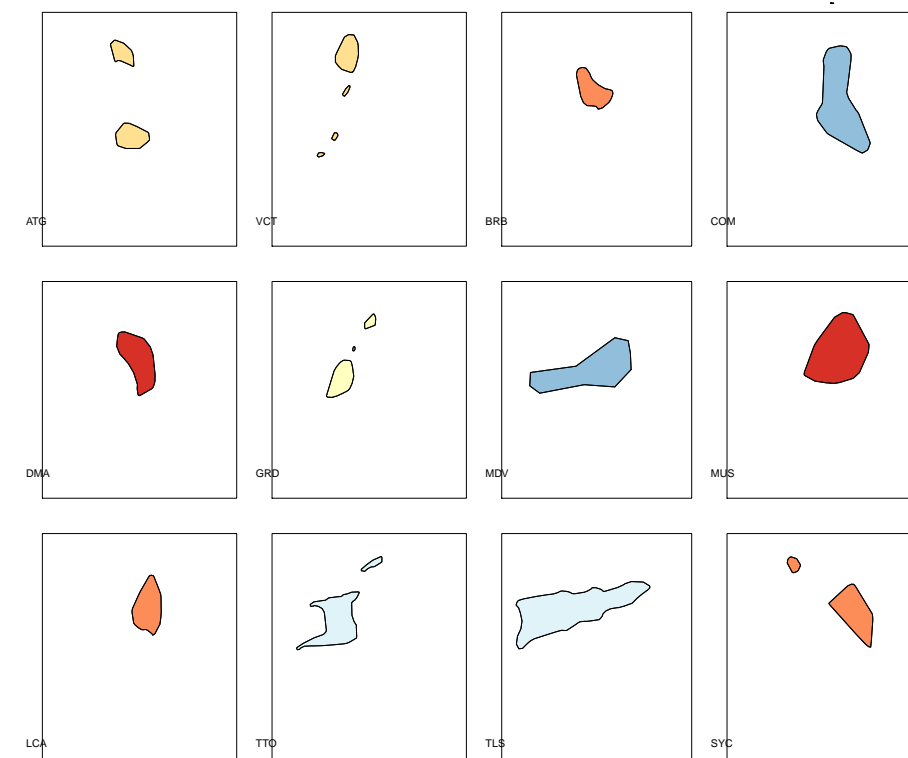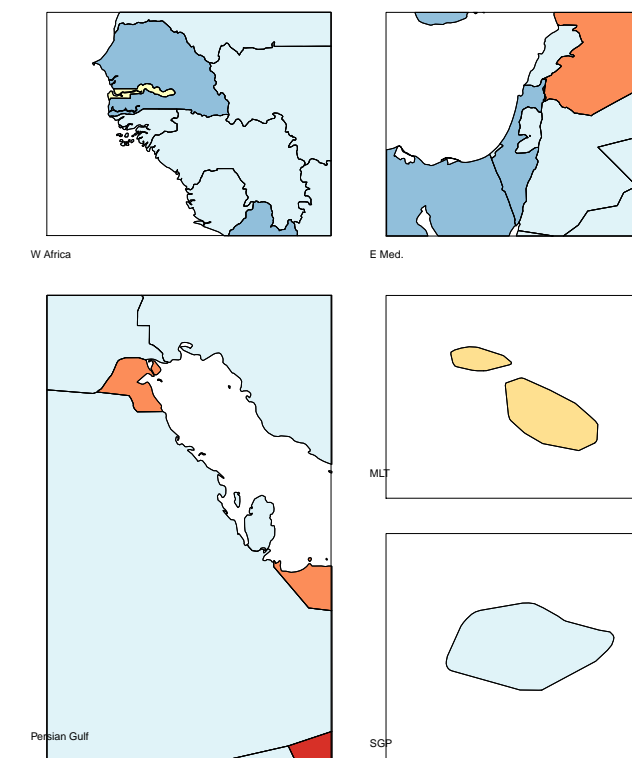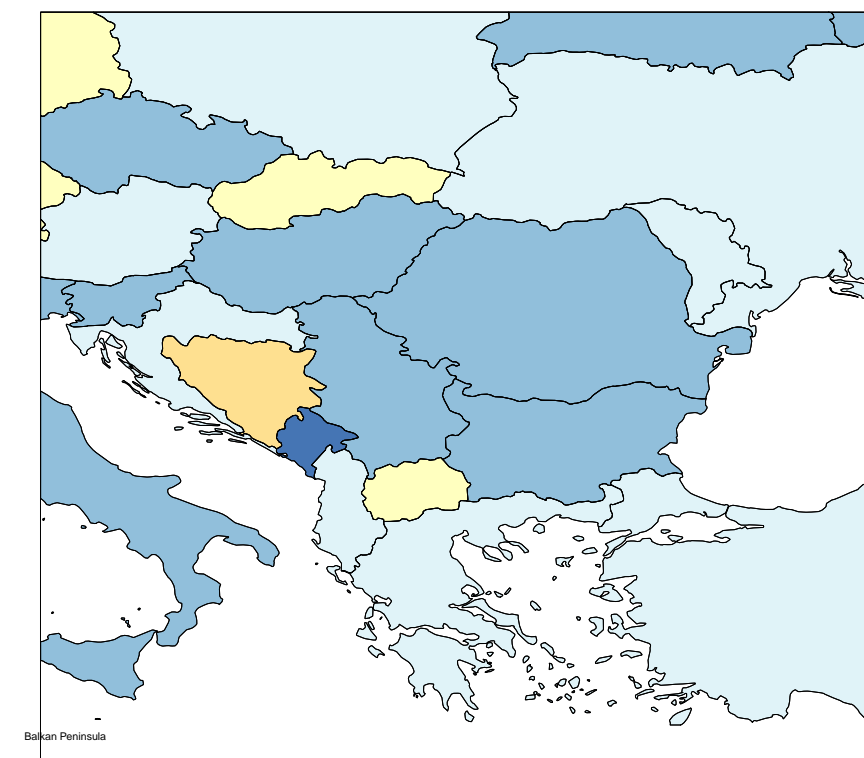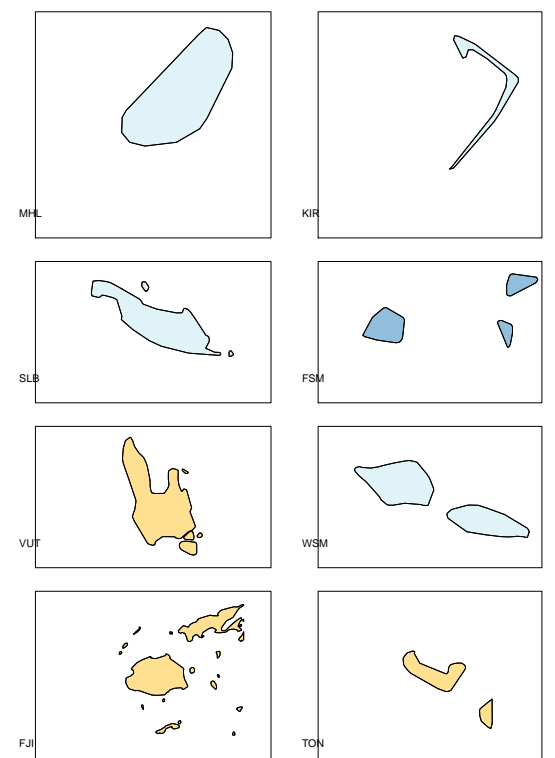

Percent changes in observed to expected disability-adjusted life years (DALYs) are plotted for different time periods and age groups. Panels A-D display changes from 1990 to 2000. Panels E-H display changes from 2000 to 2017. Panels A and E show changes for children less than 1; panels B and F show changes for children between 1 and 4; panels C and G show changes for children between 5 and 9; and panels D and H show changes for children between 10 and 19. For all plots, both sexes are combined. Subnational differentiation occurs within each country GBD models at the subnational level. Inset plots provided for detailed inspection of small or clustered regions. Abbreviations: DALY=disability-adjusted life year, GBD=Global Burden of Disease, ATG = Antigua and Barbuda, DMA = Dominica, LCA = Saint Lucia, VCT = Saint Vincent and the Grenadines, GRD = Grenada, TTO = Trinidad and Tobago, BRB = Barbados, MDV = Maldives, TLS = Timor-Leste, COM = Comoros, MUS = Mauritius, SYC = Seychelles, MLT = Malta, SGP = Singapore, MHL = Marshall Islands, SLB = Solomon Islands, VUT = Vanuatu, FJI = Fiji, KIR = Kiribati, FSM = Federated States of Micronesia, WSM = Samoa, TON = Tonga

eFigure 5f: Map of percent change for observed to expected (O:E) all-cause DALY rates from 1990 to 2000, 2000 to 2017 for <1, 1–4, 5–9, 10–19 years

© 2019 GBD 2017 Child and Adolescent Health Collaborators. JAMA Pediatrics.

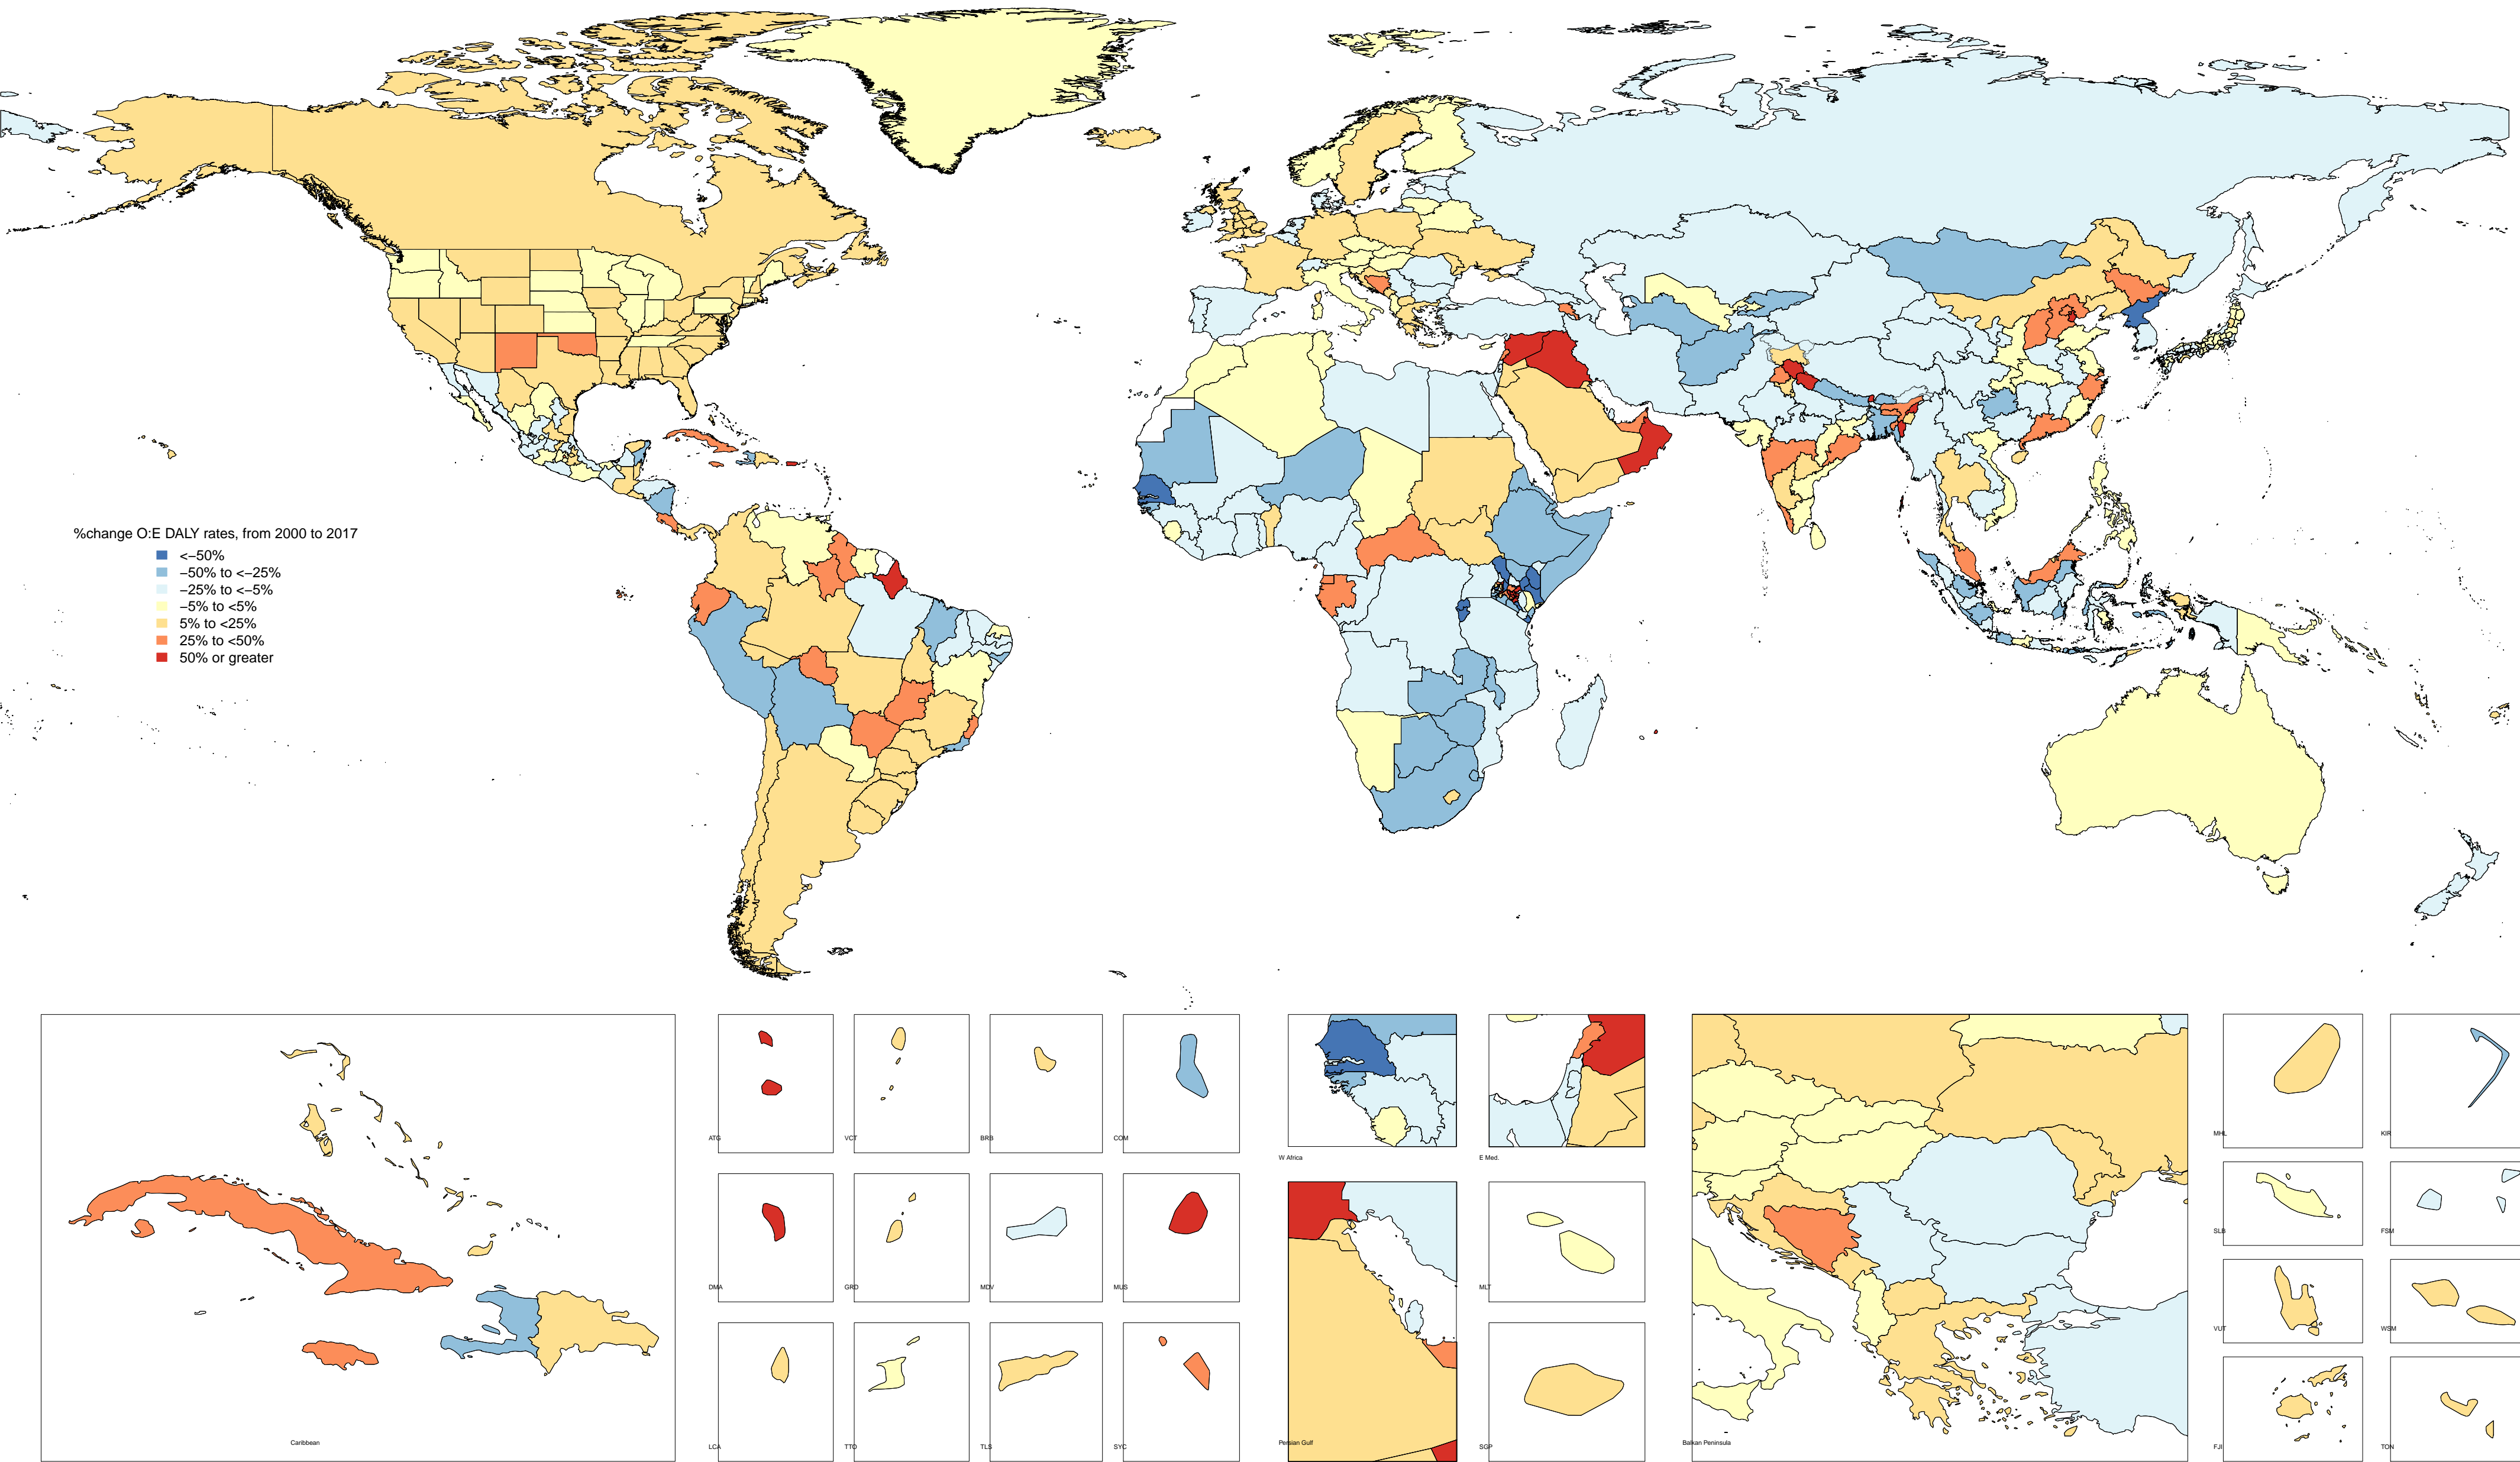

Percent changes in observed to expected disability-adjusted life years (DALYs) are plotted for different time periods and age groups. Panels A-D display changes from 1990 to 2000. Panels E-H display changes from 2000 to 2017. Panels A and E show changes for children less than 1; panels B and F show changes for children between 1 and 4; panels C and G show changes for children between 5 and 9; and panels D and H show changes for children between 10 and 19. For all plots, both sexes are combined. Subnational differentiation occurs within each country GBD models at the subnational level. Inset plots provided for detailed inspection of small or clustered regions. Abbreviations: DALY=disability-adjusted life year, GBD=Global Burden of Disease, ATG = Antigua and Barbuda, DMA = Dominica, LCA = Saint Lucia, VCT = Saint Vincent and the Grenadines, GRD = Grenada, TTO = Trinidad and Tobago, BRB = Barbados, MDV = Maldives, TLS = Timor-Leste, COM = Comoros, MUS = Mauritius, SYC = Seychelles, MLT = Malta, SGP = Singapore, MHL = Marshall Islands, SLB = Solomon Islands, VUT = Vanuatu, FJI = Fiji, KIR = Kiribati, FSM = Federated States of Micronesia, WSM = Samoa, TON = Tonga

eFigure 5g: Map of percent change for observed to expected (O:E) all-cause DALY rates from 1990 to 2000, 2000 to 2017 for <1, 1–4, 5–9, 10–19 years

© 2019 GBD 2017 Child and Adolescent Health Collaborators. JAMA Pediatrics.

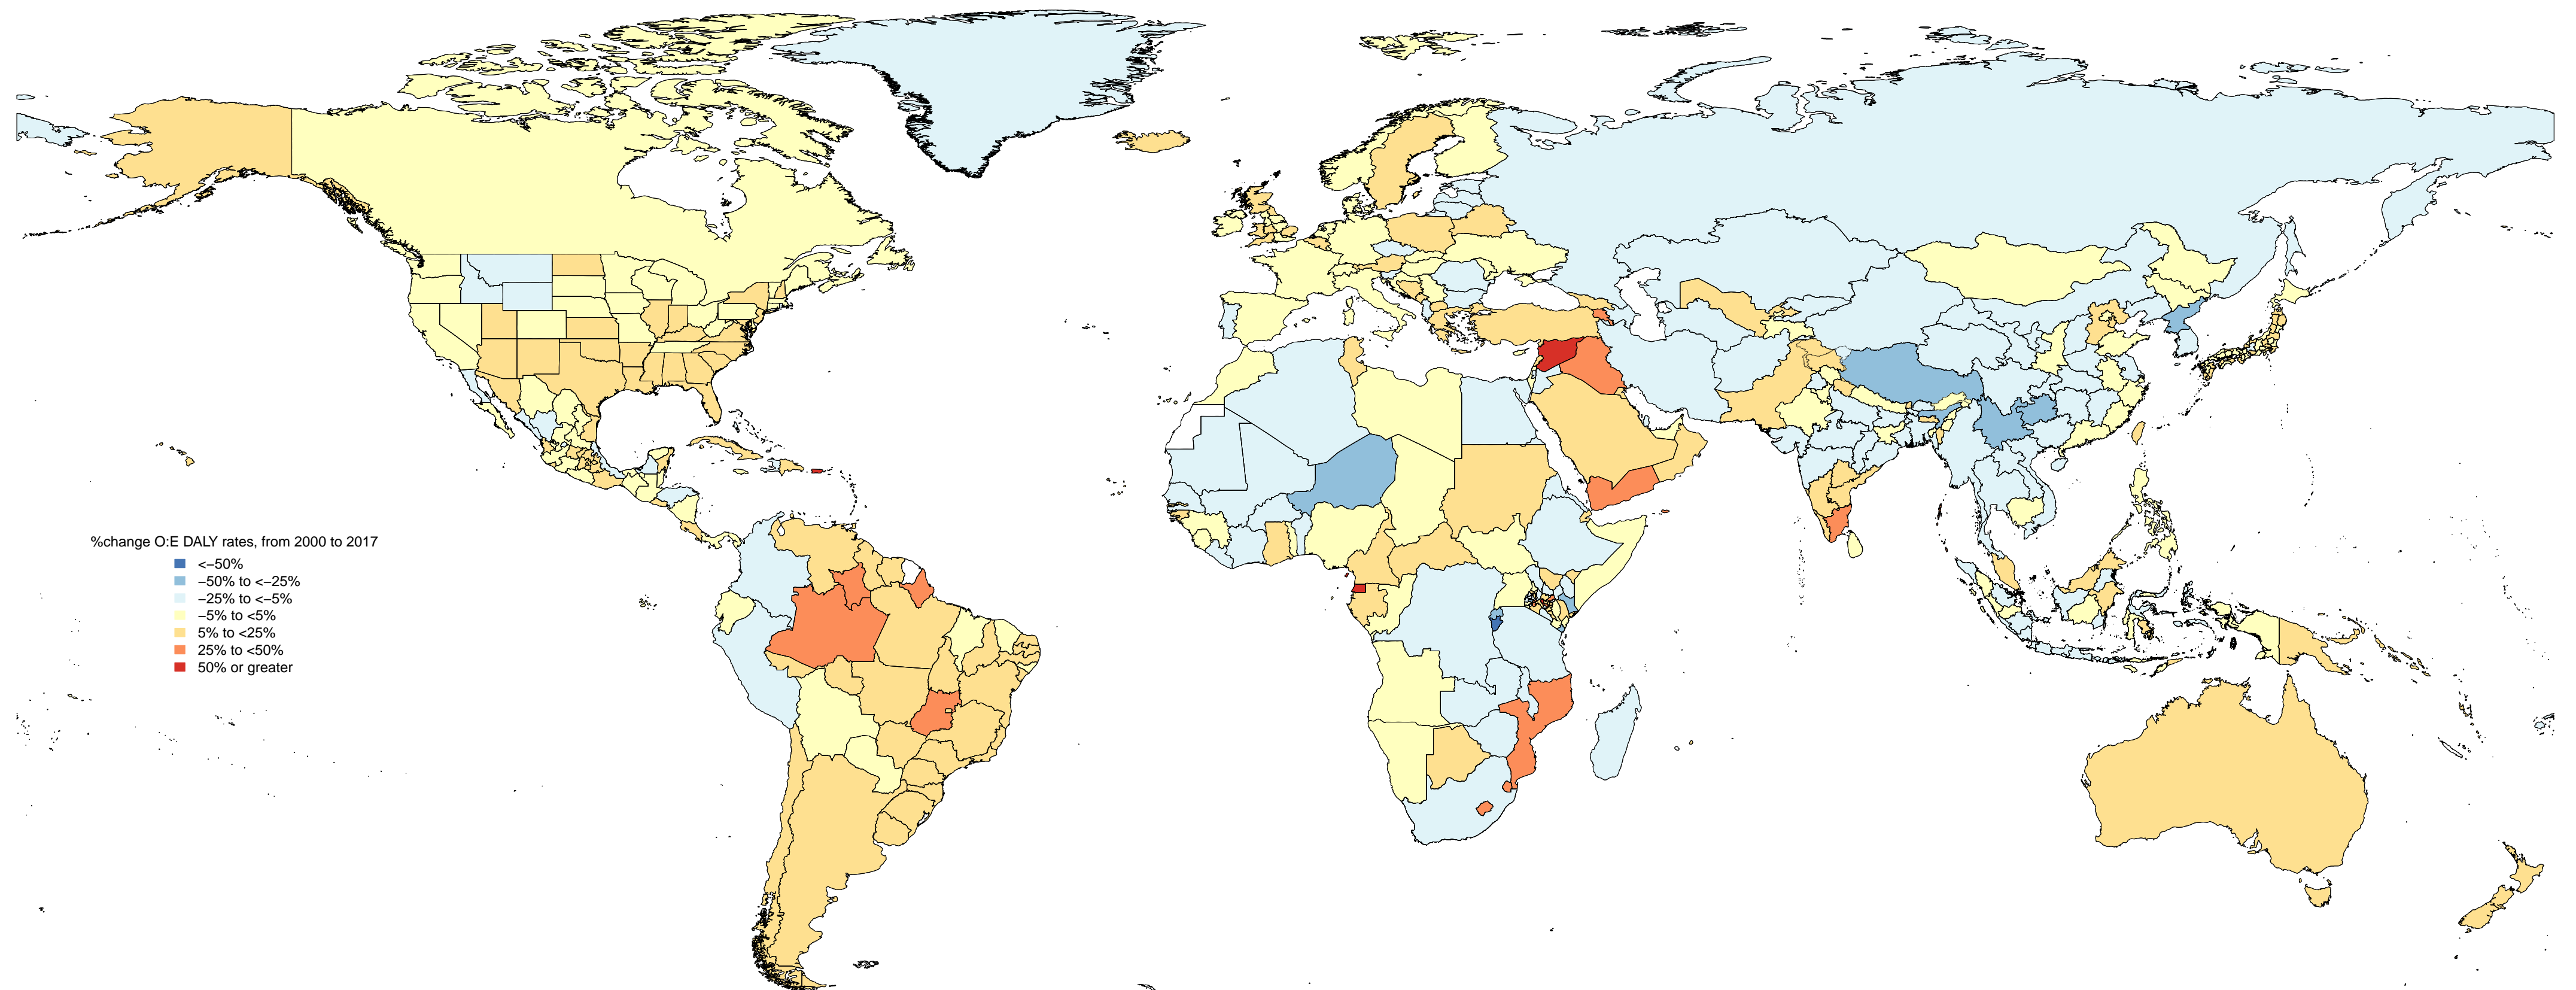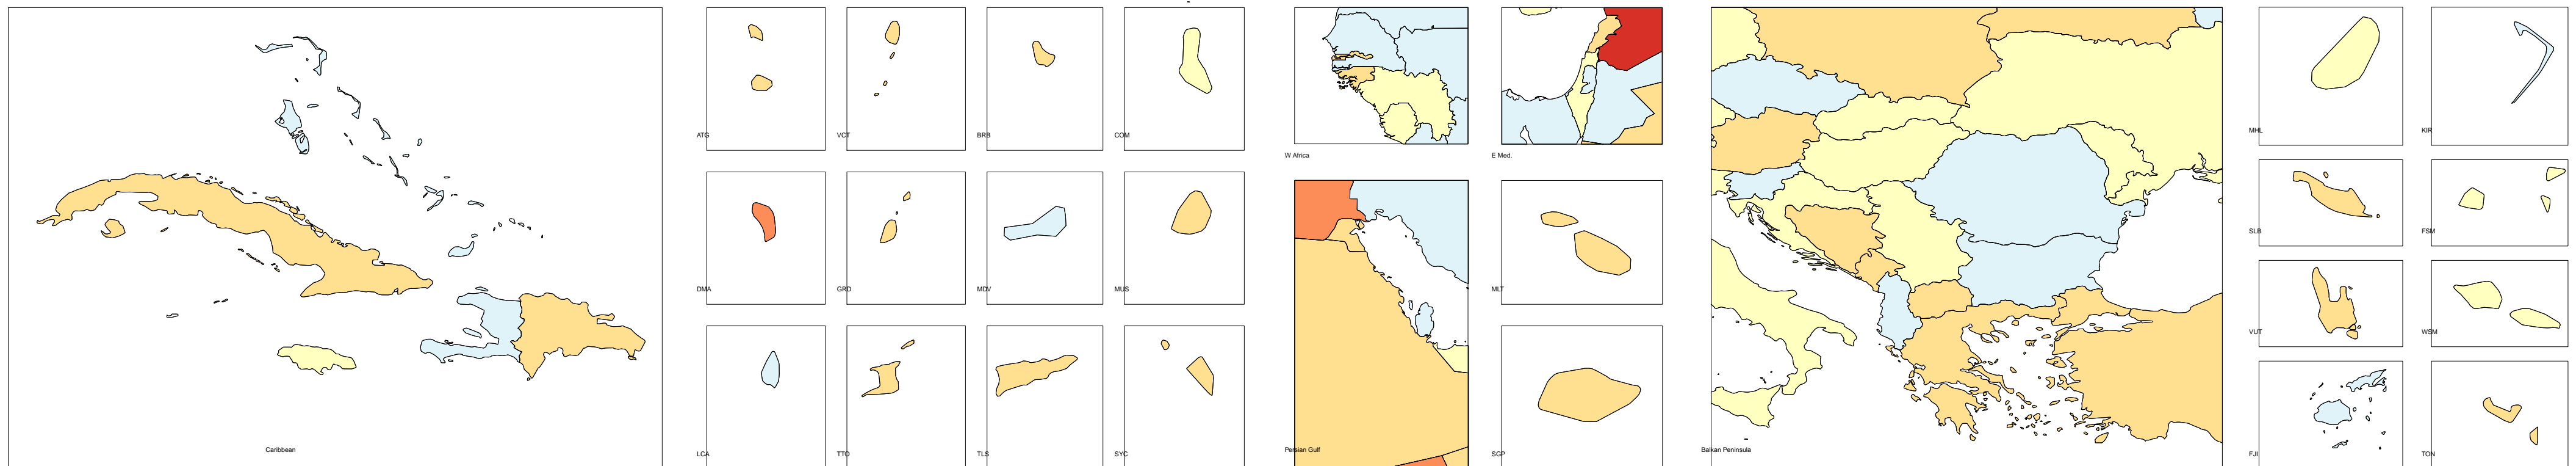

Percent changes in observed to expected disability-adjusted life years (DALYs) are plotted for different time periods and age groups. Panels A-D display changes from 1990 to 2000. Panels E-H display changes from 2000 to 2017. Panels A and E show changes for children less than 1; panels B and F show changes for children between 1 and 4; panels C and G show changes for children between 5 and 9; and panels D and H show changes for children between 10 and 19. For all plots, both sexes are combined. Subnational differentiation occurs within each country GBD models at the subnational level. Inset plots provided for detailed inspection of small or clustered regions. Abbreviations: DALY=disability-adjusted life year, GBD=Global Burden of Disease, ATG = Antigua and Barbuda, DMA = Dominica, LCA = Saint Lucia, VCT = Saint Vincent and the Grenadines, GRD = Grenada, TTO = Trinidad and Tobago, BRB = Barbados, MDV = Maldives, TLS = Timor-Leste, COM = Comoros, MUS = Mauritius, SYC = Seychelles, MLT = Malta, SGP = Singapore, MHL = Marshall Islands, SLB = Solomon Islands, VUT = Vanuatu, FJI = Fiji, KIR = Kiribati, FSM = Federated States of Micronesia, WSM = Samoa, TON = Tonga

eFigure 5h: Map of percent change for observed to expected (O:E) all-cause DALY rates from 1990 to 2000, 2000 to 2017 for <1, 1–4, 5–9, 10–19 years

© 2019 GBD 2017 Child and Adolescent Health Collaborators. JAMA Pediatrics.

22

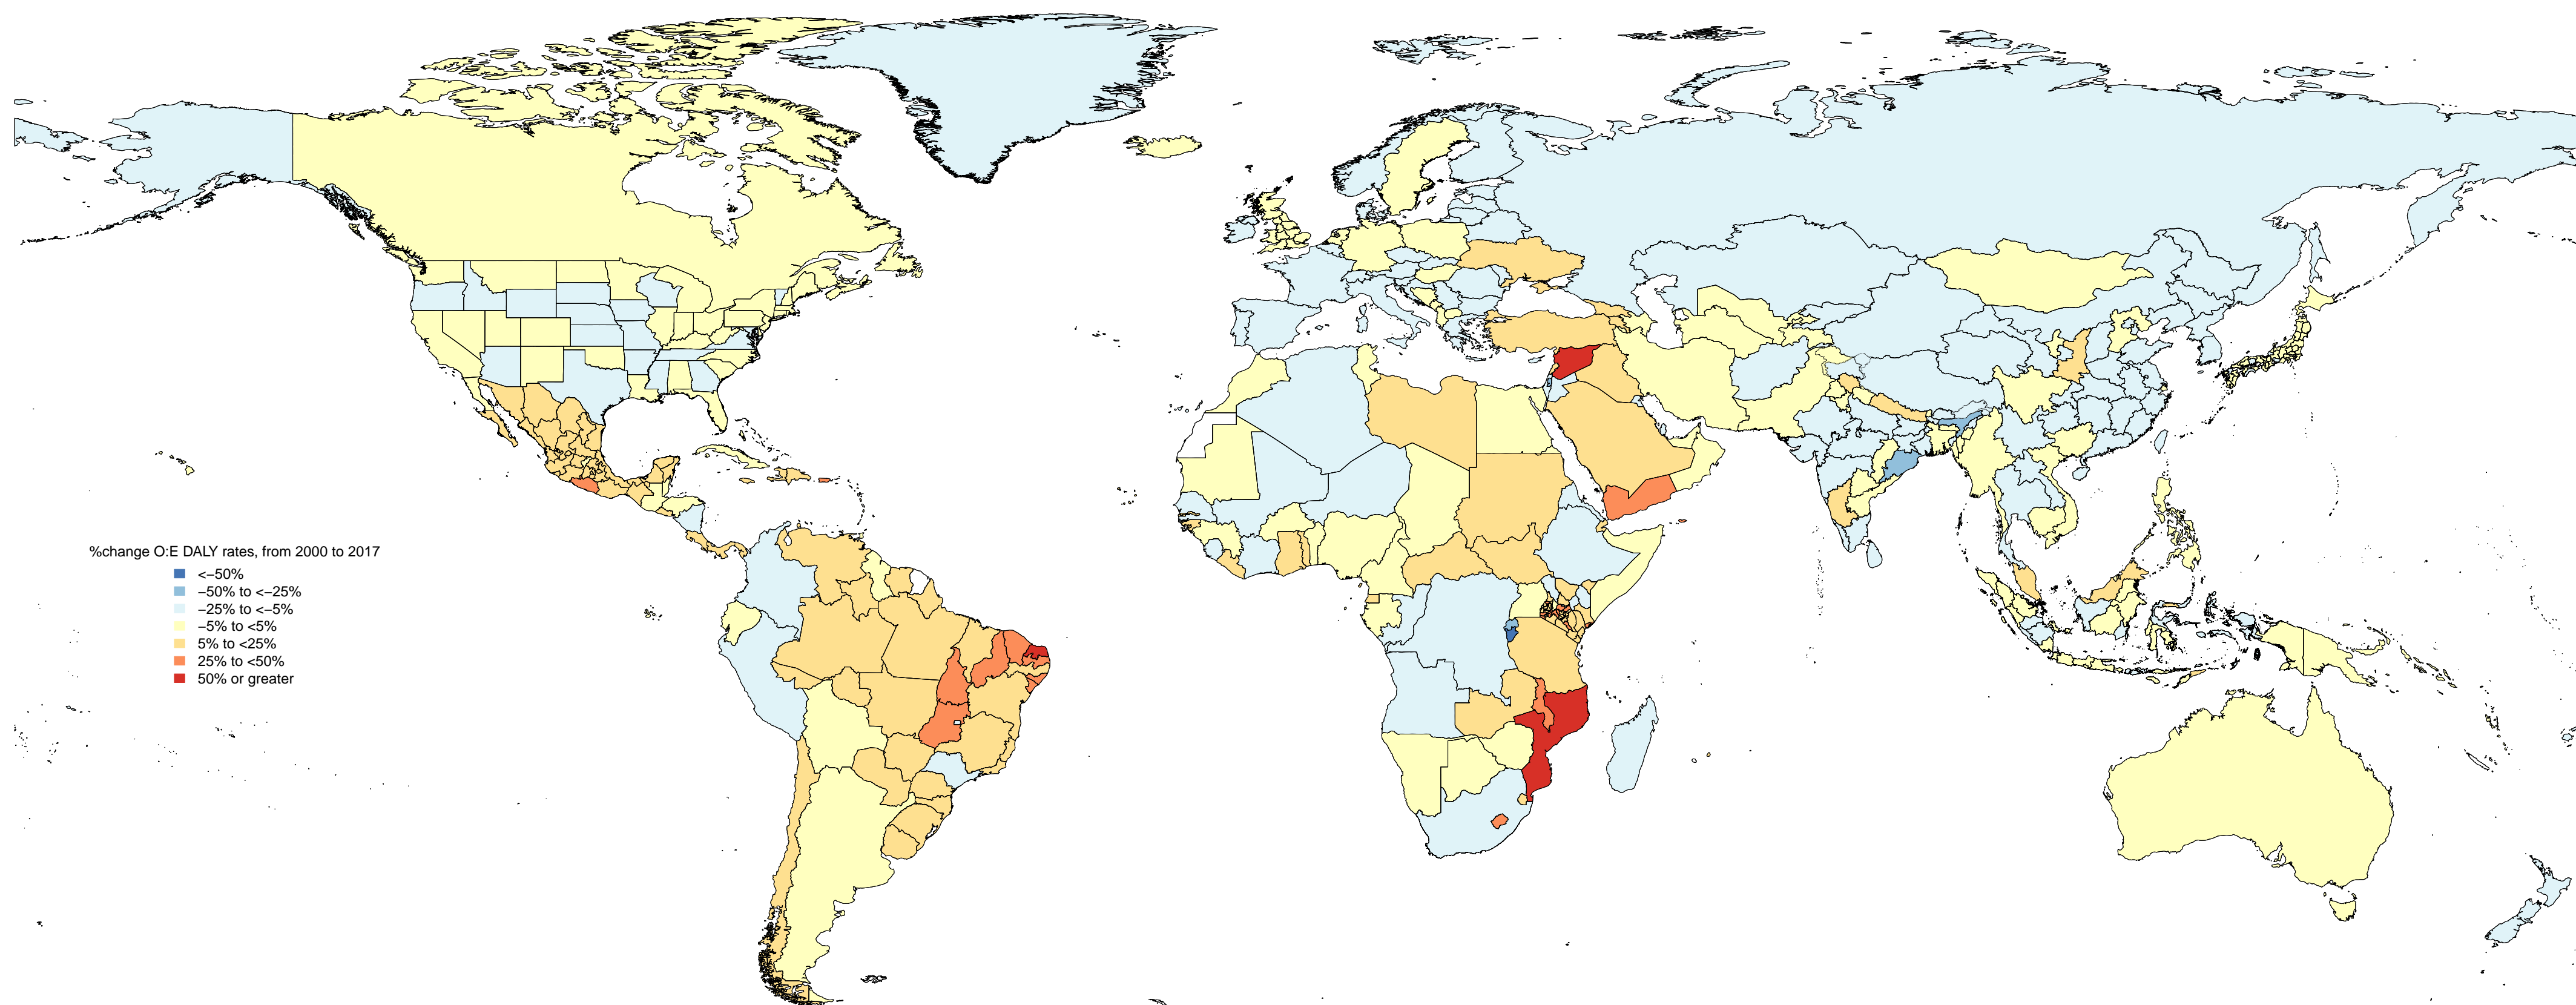

%change O:E DALY rates, from 2000 to 2017

- <-50%
- 50% to <-25%
- 25% to <-5%
- 5% to <5%
- 5% to <25%
- 25% to <50%
- 50% or greater

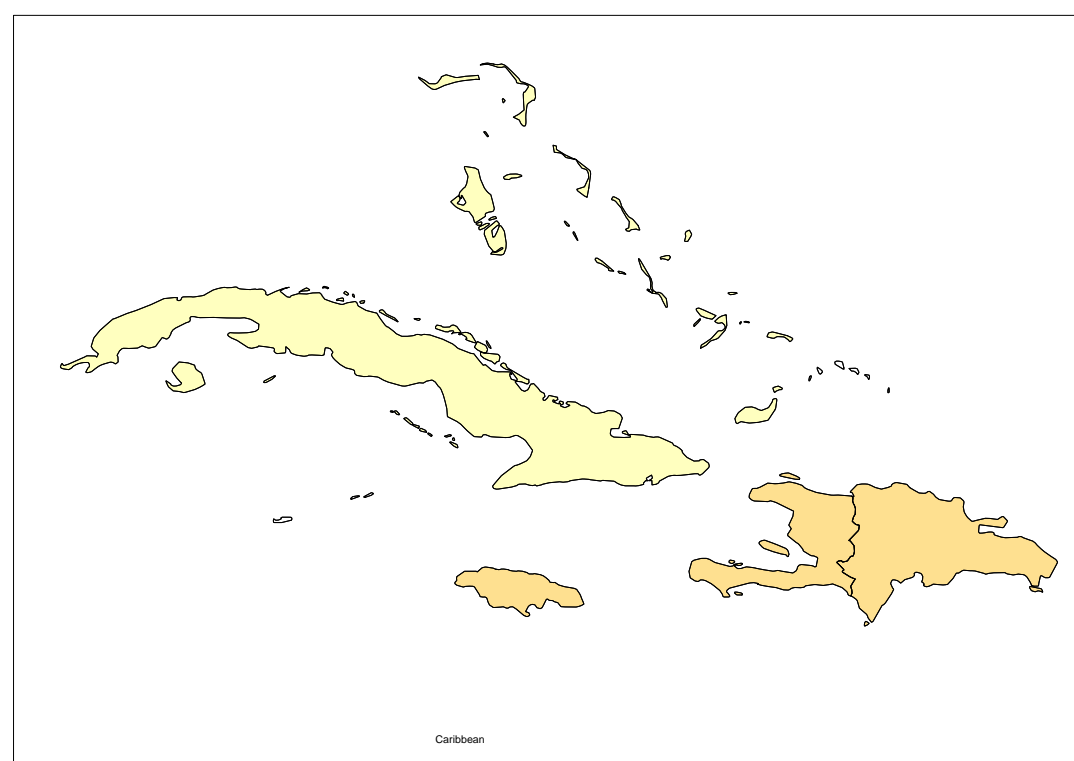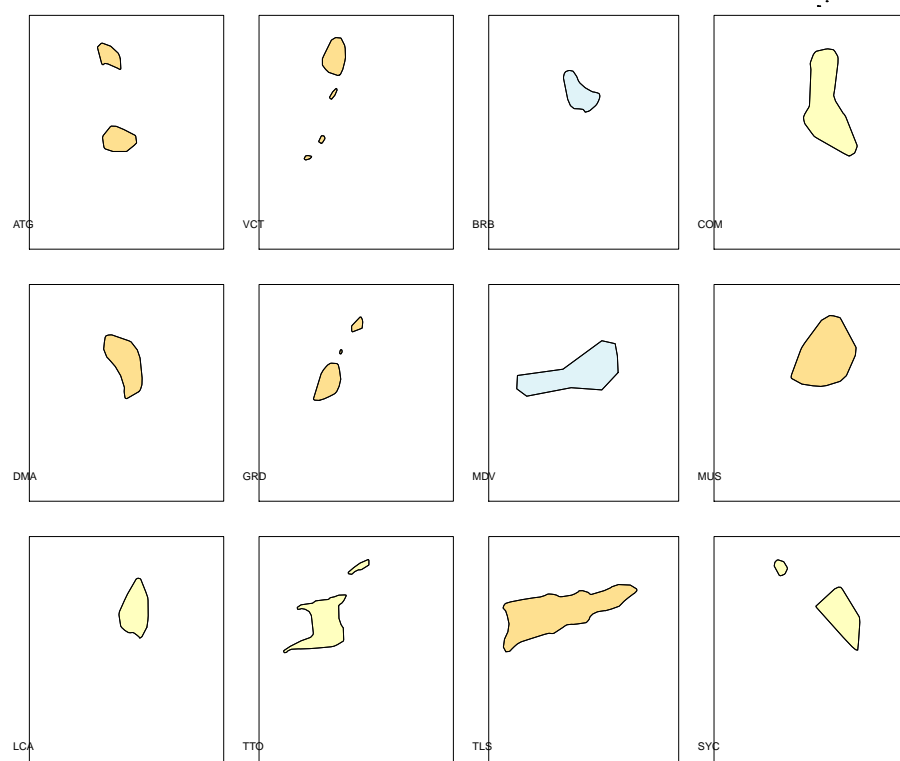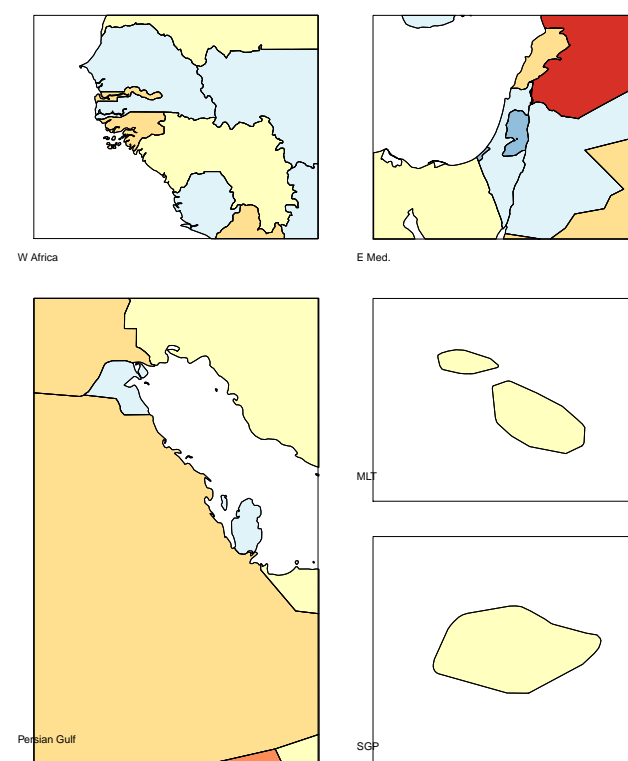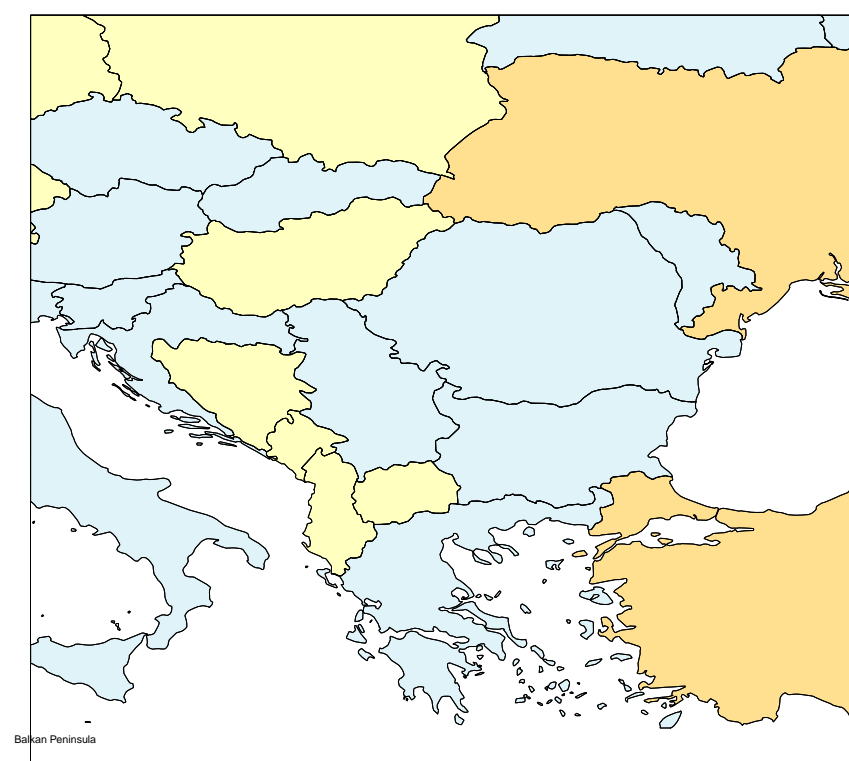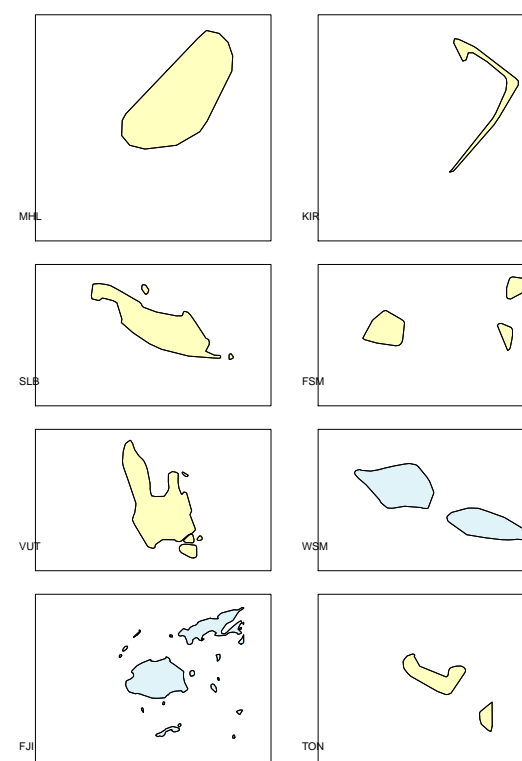

Percent changes in observed to expected disability-adjusted life years (DALYs) are plotted for different time periods and age groups. Panels A-D display changes from 1990 to 2000. Panels E-H display changes from 2000 to 2017. Panels A and E show changes for children less than 1; panels B and F show changes for children between 1 and 4; panels C and G show changes for children between 5 and 9; and panels D and H show changes for children between 10 and 19. For all plots, both sexes are combined. Subnational differentiation occurs within each country GBD models at the subnational level. Inset plots provided for detailed inspection of small or clustered regions. Abbreviations: DALY=disability-adjusted life year, GBD=Global Burden of Disease, ATG = Antigua and Barbuda, DMA = Dominica, LCA = Saint Lucia, VCT = Saint Vincent and the Grenadines, GRD = Grenada, TTO = Trinidad and Tobago, BRB = Barbados, MDV = Maldives, TLS = Timor-Leste, COM = Comoros, MUS = Mauritius, SYC = Seychelles, MLT = Malta, SGP = Singapore, MHL = Marshall Islands, SLB = Solomon Islands, VUT = Vanuatu, FJI = Fiji, KIR = Kiribati, FSM = Federated States of Micronesia, WSM = Samoa, TON = Tonga

eFigure 6a. Annual percent change of observed (O:E) all-cause DALY rates in <20 years from 1990 to 2000 versus 2000 to 2017

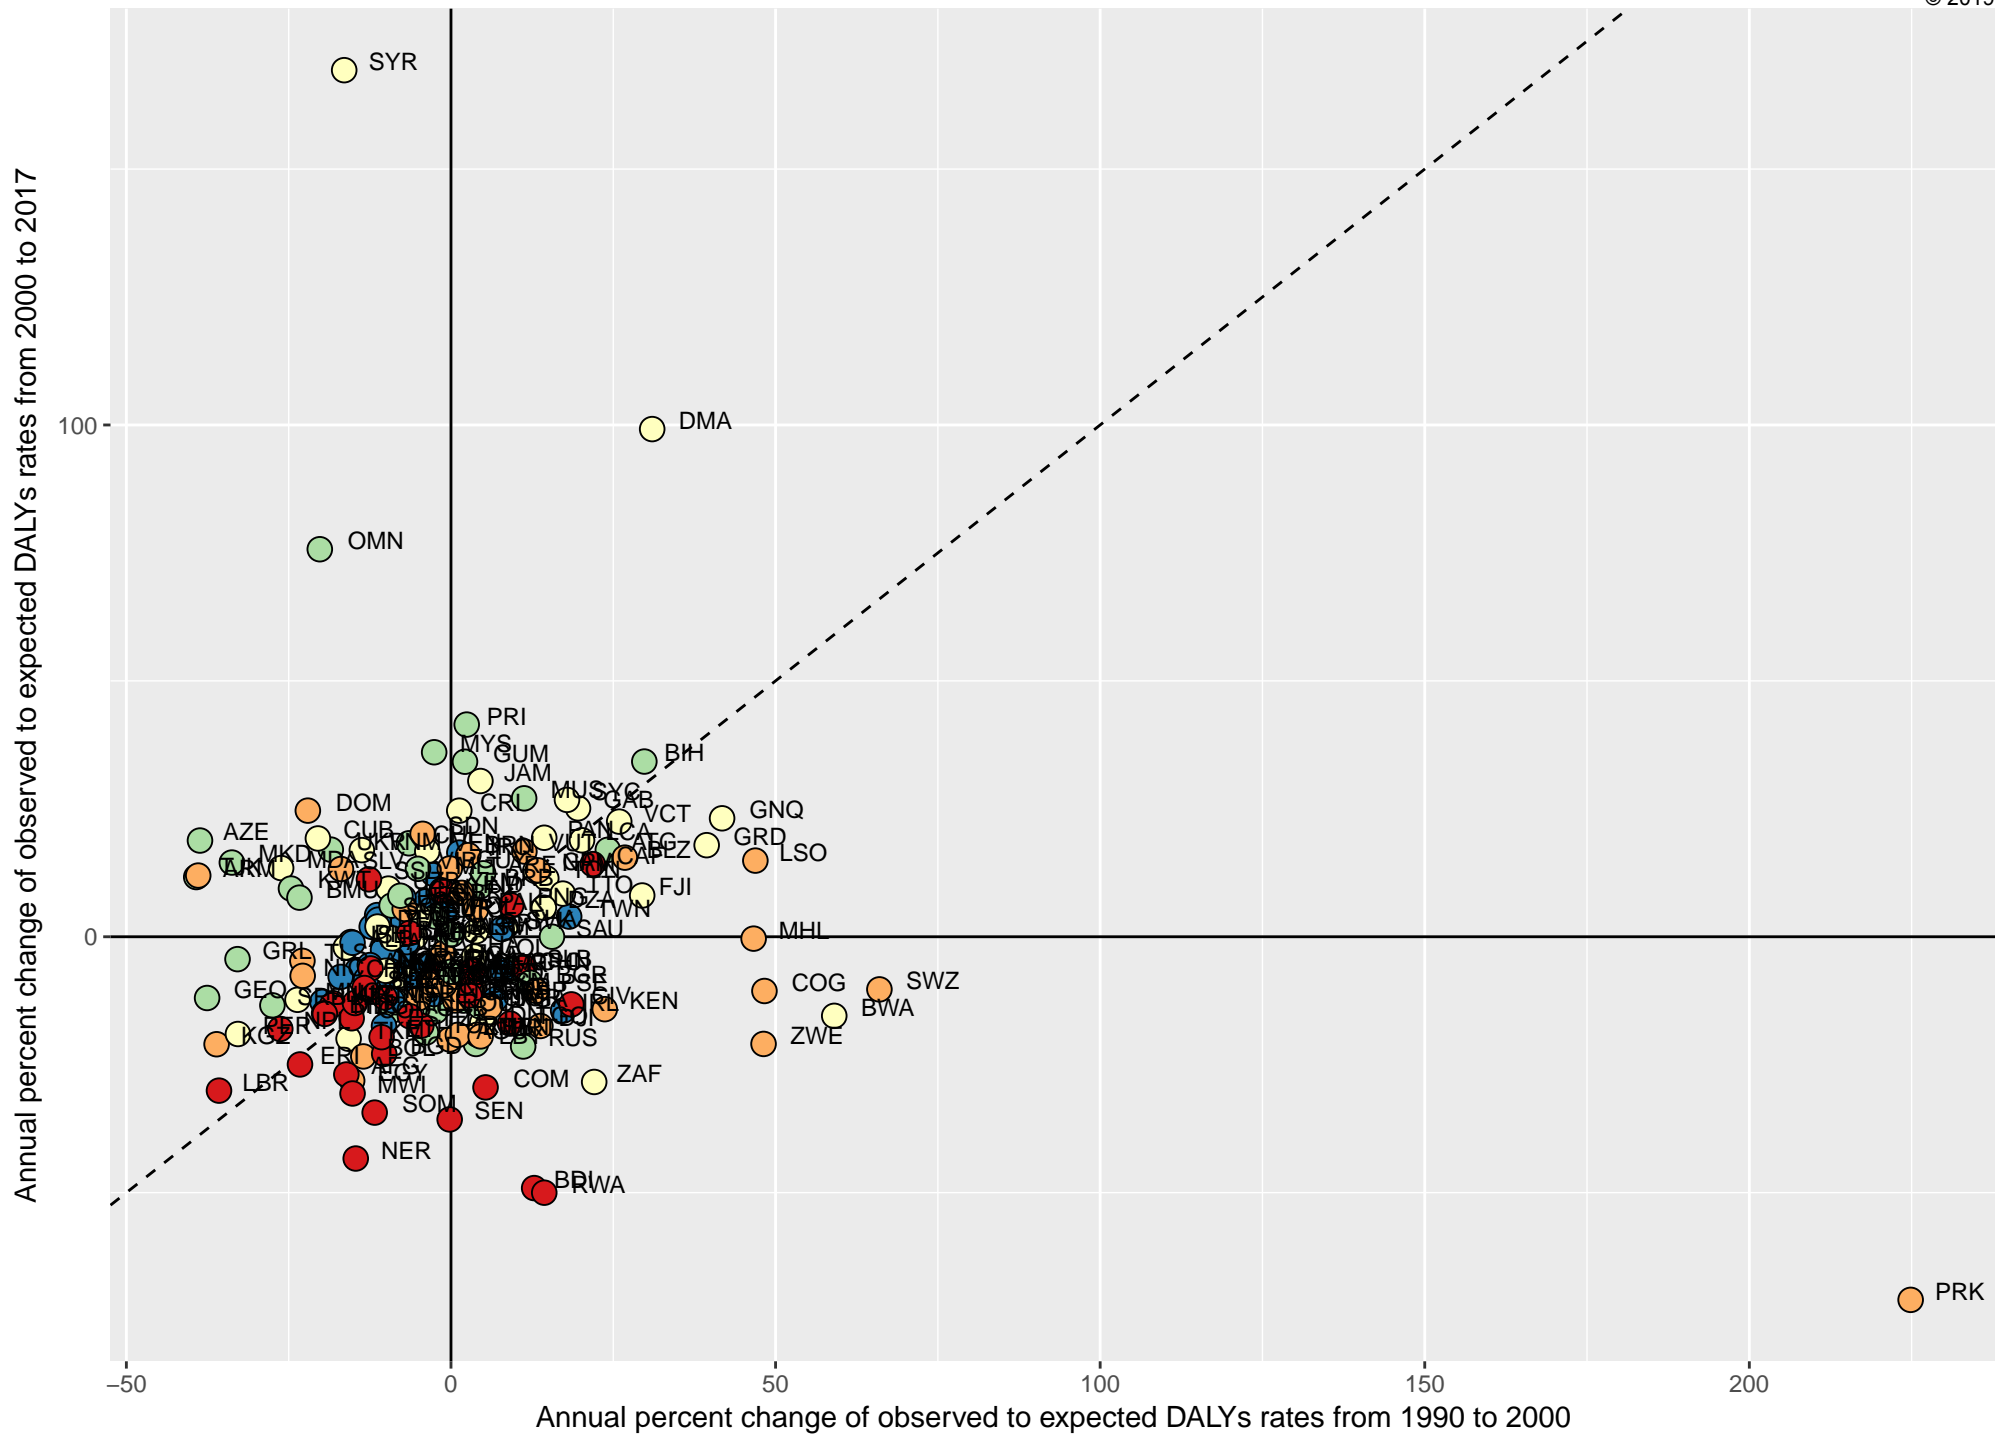

eFigure 6a. Annual percent change of observed (O:E) all-cause DALY rates in <20 years from 1990 to 2000 versus 2000 to 2017 (graph subsetting to +/- 50%)

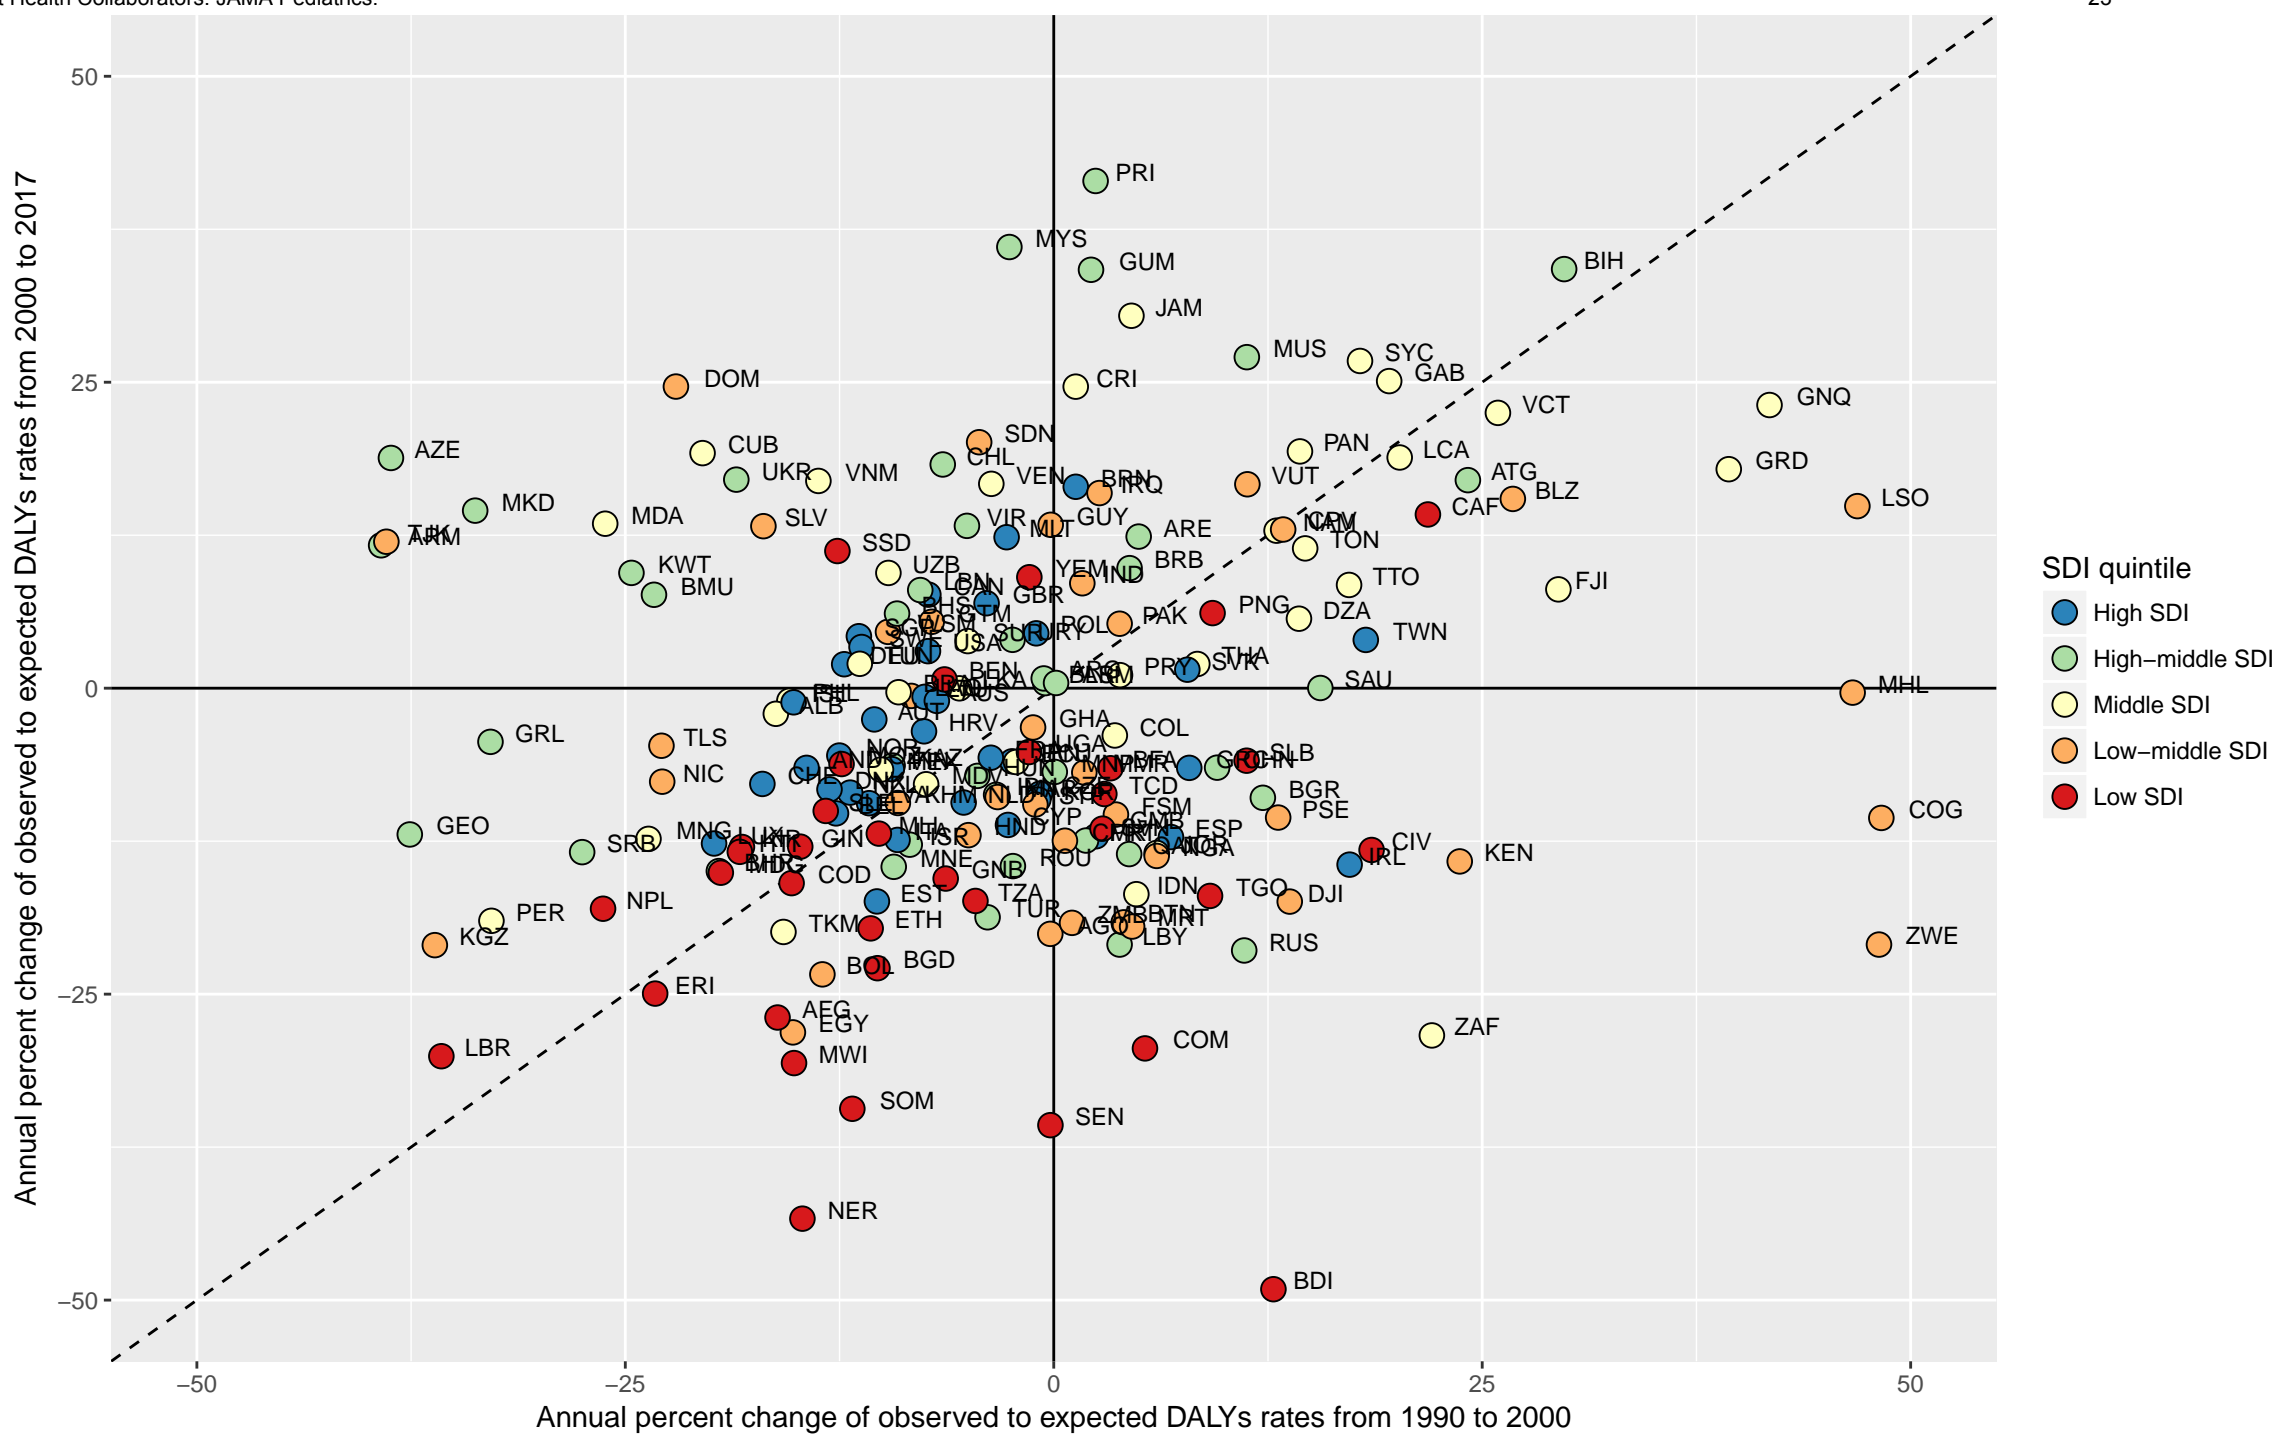

Annual percent change of observed versus expected (O:E) disability-adjusted life years (DALYs) rates by country for 1990 to 2000 versus 2000 to 2017 are plotted by country. In each pair of panels, the right panel focuses on changes within +/-50%. Panels a–d plot changes for all children and adolescents less than 20 years of age; panels e–h plot changes for children less than 1; panels i–l plot changes for children between 1 and 4; panels m–p plot changes for children between 5 and 9; and panels q–t plot changes for children between 10 and 19. For each age group, the first plot in the series is the all cause change in O:E rates (i.e., panels a, e, i, m, and q); the second plot in the series is the change in O:E rates associated with communicable, maternal, neonatal, and nutritional (CMNN) conditions (i.e., panels b, f, j, and r); the third plot in the series is the change in O:E rates associated with non-communicable diseases (NCDs – i.e., panels c, g, k, s); and the fourth plot in the series is the change in O:E rates associated with injuries (i.e., panels d, h, l, t). For each, countries in different socio-demographic index (SDI) quintiles are plotted with different countries. Abbreviations: DALY=disability-adjusted life year, AFG – Afghanistan, AGO – Angola, ALB – Albania, AND – Andorra, ARE – United Arab Emirates, ARG – Argentina, ARM – Armenia, ASM – American Samoa, ATG – Antigua and Barbuda, AUS – Australia, AUT – Austria, AZE – Azerbaijan, BDI – Burundi, BEL – Belgium, BEN – Benin, BFA – Burkina Faso, BGD – Bangladesh, BGR – Bulgaria, BHR – Bahrain, BHS – The Bahamas, BIH – Bosnia and Herzegovina, BLR – Belarus, BLZ – Belize, BMU – Bermuda, BOL – Bolivia, BRA – Brazil, BRB – Barbados, BRN – Brunei, BTN – Bhutan, BWA – Botswana, CAF – Central African Republic, CAN – Canada, CHE – Switzerland, CHL – Chile, CHN – China, CIV – Cote d'Ivoire, CMR – Cameroon, COD – Democratic Republic of the Congo, COG – Congo, COL – Colombia, COM – Comoros, CPV – Cape Verde, CRI – Costa Rica, CUB – Cuba, CYP – Cyprus, CZE – Czech Republic, DEU – Germany, DJI – Djibouti, DMA – Dominica, DNK – Denmark, DOM – Dominican Republic, DZA – Algeria, ECU – Ecuador, EGY – Egypt, ERI – Eritrea, ESP – Spain, EST – Estonia, ETH – Ethiopia, FIN – Finland, FJI – Fiji, FRA – France, FSM – Federated States of Micronesia, G – Global, GAB – Gabon, GBR – United Kingdom, GEO – Georgia, GHA – Ghana, GIN – Guinea, GMB – The Gambia, GNB – Guinea-Bissau, GNQ – Equatorial Guinea, GRC – Greece, GRD – Grenada, GRL – Greenland, GTM – Guatemala, GUM – Guam, GUY – Guyana, HND – Honduras, HRV – Croatia, HTI – Haiti, HUN – Hungary, IDN – Indonesia, IND – India, IRL – Ireland, IRN – Iran, IRQ – Iraq, ISL – Iceland, ISR – Israel, ITA – Italy, JAM – Jamaica, JOR – Jordan, JPN – Japan, KAZ – Kazakhstan, KEN – Kenya, KGZ – Kyrgyzstan, KHM – Cambodia, KIR – Kiribati, KOR – South Korea, KWT – Kuwait, LAO – Laos, LBN – Lebanon, LBR – Liberia, LBY – Libya, LCA – Saint Lucia, LKA – Sri Lanka, LSO – Lesotho, LTU – Lithuania, LUX – Luxembourg, LVA – Latvia, MAR – Morocco, MDA – Moldova, MDG – Madagascar, MDV – Maldives, MEX – Mexico, MHL – Marshall Islands, MKD – Macedonia, MLI – Mali, MLT – Malta, MMR – Myanmar, MNE – Montenegro, MNG – Mongolia, MNP – Northern Mariana Islands, MOZ – Mozambique, MRT – Mauritania, MUS – Mauritius, MWI – Malawi, MYS – Malaysia, NAM – Namibia, NER – Niger, NGA – Nigeria, NIC – Nicaragua, NLD – Netherlands, NOR – Norway, NPL – Nepal, NZL – New Zealand, OMN – Oman, PAK – Pakistan, PAN – Panama, PER – Peru, PHL – Philippines, PNG – Papua New Guinea, POL – Poland, PRI – Puerto Rico, PRK – North Korea, PRT – Portugal, PRY – Paraguay, PSE – Palestine, QAT – Qatar, ROU – Romania, RUS – Russian Federation, RWA – Rwanda, SAU – Saudi Arabia, SDN – Sudan, SEN – Senegal, SGP – Singapore, SLB – Solomon Islands, SLE – Sierra Leone, SLV – El Salvador, SOM – Somalia, SRB – Serbia, SSD – South Sudan, STP – Sao Tome and Principe, SUR – Suriname, SVK – Slovakia, SVN – Slovenia, SWE – Sweden, SWZ – Swaziland, SYC – Seychelles, SYR – Syria, TCD – Chad, TGO – Togo, THA – Thailand, TJK – Tajikistan, TKM – Turkmenistan, TLS – Timor-Leste, TON – Tonga, TTO – Trinidad and Tobago, TUN – Tunisia, TUR – Turkey, TWN – Taiwan, TZA – Tanzania, UGA – Uganda, UKR – Ukraine, URY – Uruguay, USA – United States, UZB – Uzbekistan, VCT – Saint Vincent and the Grenadines, VEN – Venezuela, VIR – Virgin Islands, U.S., VNM – Vietnam, VUT – Vanuatu, WSM – Samoa, YEM – Yemen, ZAF – South Africa, ZMB – Zambia, ZWE – Zimbabwe

eFigure 6b. Annual percent change of observed to expected (O:E) all-cause DALY rates in <20 years from 1990 to 2000 versus 2000 to 2017

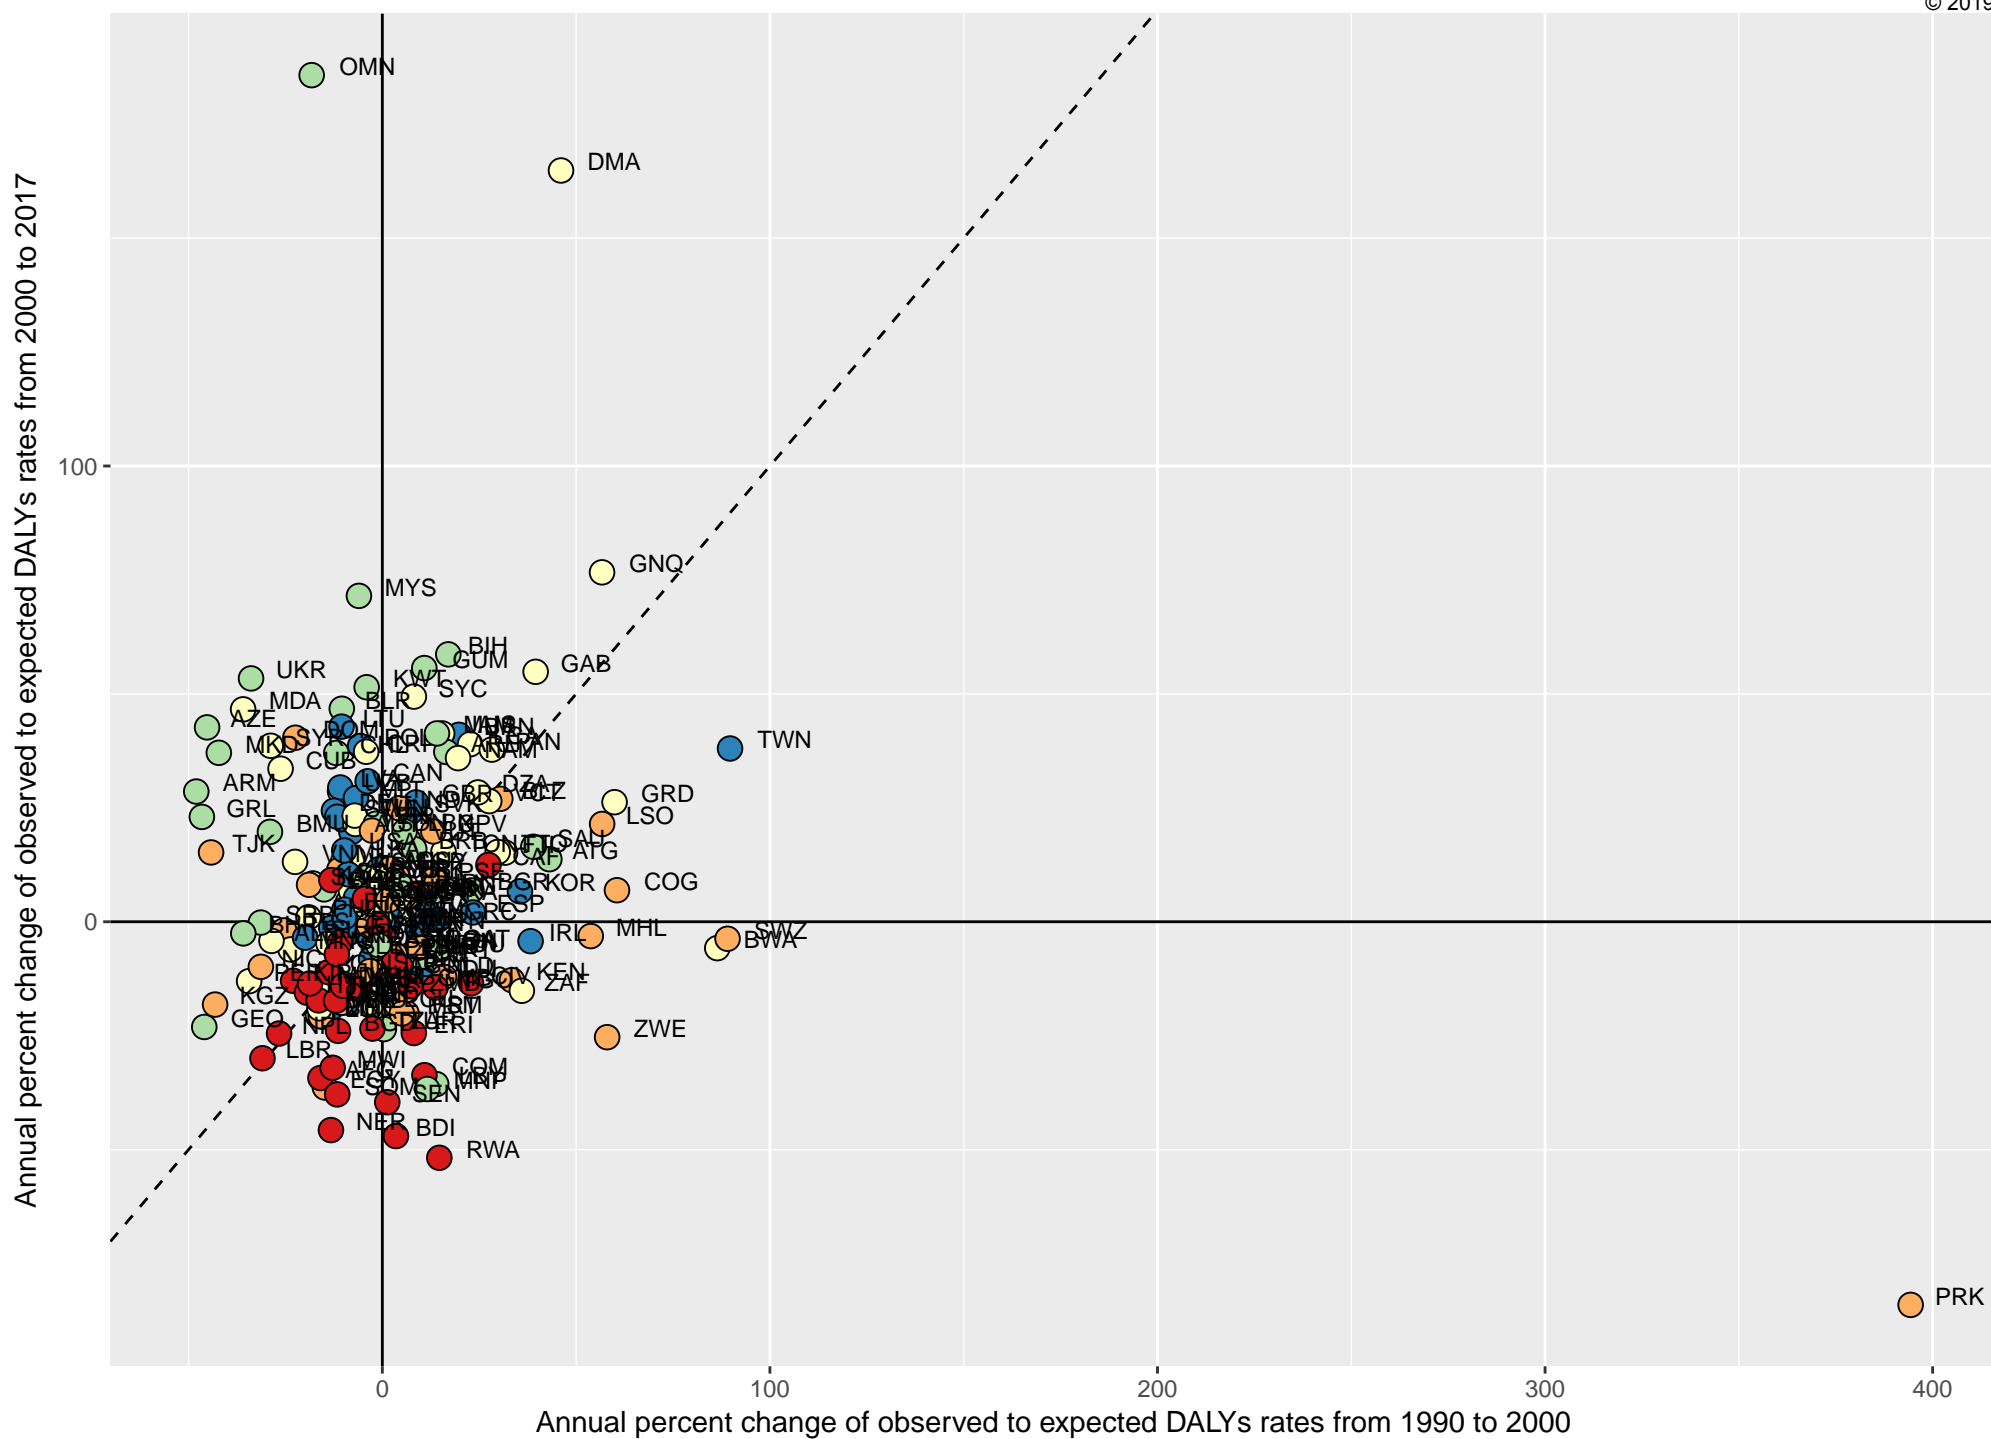

Annual percent change of observed versus expected (O:E) disability-adjusted life years (DALYs) rates by country for 1990 to 2000 versus 2000 to 2017 are plotted by country. In each pair of panels, the right panel focuses on changes within +/-50%. Panels a-d plot changes for all children and adolescents less than 20 years of age; panels e-h plot changes for children less than 1; panels i-l plot changes for children between 1 and 4; panels m-p plot changes for children between 5 and 9; and panels q-t plot changes for children between 10 and 19. For each age group, the first plot in the series is the all cause change in O:E rates (i.e., panels a, e, i, m, and q); the second plot in the series is the change in O:E rates associated with communicable, maternal, neonatal, and nutritional (CMNN) conditions (i.e., panels b, f, j, and r); the third plot in the series is the change in O:E rates associated with non-communicable diseases (NCDs - i.e., panels c, g, k, s); and the fourth plot in the series is the change in O:E rates associated with injuries (i.e., panels d, h, l, t). For each, countries in different socio-demographic index (SDI) quintiles are plotted with different countries. Abbreviations: DALY=disability-adjusted life year, AFG - Afghanistan, AGO - Angola, ALB - Albania, AND - Andorra, ARE - United Arab Emirates, ARG - Argentina, ARM - Armenia, ASM - American Samoa, ATG - Antigua and Barbuda, AUS - Australia, AUT - Austria, AZE - Azerbaijan, BDI - Burundi, BEL - Belgium, BEN - Benin, BFA - Burkina Faso, BGD - Bangladesh, BGR - Bulgaria, BHR - Bahrain, BHS - The Bahamas, BIH - Bosnia and Herzegovina, BLR - Belarus, BLZ - Belize, BMU - Bermuda, BOL - Bolivia, BRA - Brazil, BRB - Barbados, BRN - Brunei, BTN - Bhutan, BWA - Botswana, CAF - Central African Republic, CAN - Canada, CHE - Switzerland, CHL - Chile, CHN - China, CIV - Cote d'Ivoire, CMR - Cameroon, COD - Democratic Republic of the Congo, COG - Congo, COL - Colombia, COM - Comoros, CPV - Cape Verde, CRI - Costa Rica, CUB - Cuba, CYP - Cyprus, CZE - Czech Republic, DEU - Germany, DJI - Djibouti, DMA - Dominica, DNK - Denmark, DOM - Dominican Republic, DZA - Algeria, ECU - Ecuador, EGY - Egypt, ERI - Eritrea, ESP - Spain, EST - Estonia, ETH - Ethiopia, FIN - Finland, FJI - Fiji, FRA - France, FSM - Federated States of Micronesia, G - Global, GAB - Gabon, GBR - United Kingdom, GEO - Georgia, GHA - Ghana, GIN - Guinea, GMB - The Gambia, GNB - Guinea-Bissau, GNQ - Equatorial Guinea, GRC - Greece, GRD - Grenada, GRL - Greenland, GTM - Guatemala, GUM - Guam, GUY - Guyana, HND - Honduras, HRV - Croatia, HTI - Haiti, HUN - Hungary, IDN - Indonesia, IND - India, IRL - Ireland, IRN - Iran, IRQ - Iraq, ISL - Iceland, ISR - Israel, ITA - Italy, JAM - Jamaica, JOR - Jordan, JPN - Japan, KAZ - Kazakhstan, KEN - Kenya, KGZ - Kyrgyzstan, KHM - Cambodia, KIR - Kiribati, KOR - South Korea, KWT - Kuwait, LAO - Laos, LBN - Lebanon, LBR - Liberia, LBY - Libya, LCA - Saint Lucia, LKA - Sri Lanka, LSO - Lesotho, LTU - Lithuania, LUX - Luxembourg, LVA - Latvia, MAR - Morocco, MDA - Moldova, MDG - Madagascar, MDV - Maldives, MEX - Mexico, MHL - Marshall Islands, MKD - Macedonia, MLI - Mali, MLT - Malta, MMR - Myanmar, MNE - Montenegro, MNG - Mongolia, MNP - Northern Mariana Islands, MOZ - Mozambique, MRT - Mauritania, MUS - Mauritius, MWI - Malawi, MYS - Malaysia, NAM - Namibia, NER - Niger, NGA - Nigeria, NIC - Nicaragua, NLD - Netherlands, NOR - Norway, NPL - Nepal, NZL - New Zealand, OMN - Oman, PAK - Pakistan, PAN - Panama, PER - Peru, PHL - Philippines, PNG - Papua New Guinea, POL - Poland, PRI - Puerto Rico, PRK - North Korea, PRT - Portugal, PRY - Paraguay, PSE - Palestine, QAT - Qatar, ROU - Romania, RUS - Russian Federation, RWA - Rwanda, SAU - Saudi Arabia, SDN - Sudan, SEN - Senegal, SGP - Singapore, SLB - Solomon Islands, SLE - Sierra Leone, SLV - El Salvador, SOM - Somalia, SRB - Serbia, SSD - South Sudan, STP - Sao Tome and Principe, SUR - Suriname, SVK - Slovakia, SVN - Slovenia, SWE - Sweden, SWZ - Swaziland, SYC - Seychelles, SYR - Syria, TCD - Chad, TGO - Togo, THA - Thailand, TJK - Tajikistan, TKM - Turkmenistan, TLS - Timor-Leste, TON - Tonga, TTO - Trinidad and Tobago, TUN - Tunisia, TUR - Turkey, TWN - Taiwan, TZA - Tanzania, UGA - Uganda, UKR - Ukraine, URY - Uruguay, USA - United States, UZB - Uzbekistan, VCT - Saint Vincent and the Grenadines, VEN - Venezuela, VIR - Virgin Islands, U.S., VNM - Vietnam, VUT - Vanuatu, WSM - Samoa, YEM - Yemen, ZAF - South Africa, ZMB - Zambia, ZWE - Zimbabwe

eFigure 6b. Annual percent change of observed to expected (O:E) all-cause DALY rates in <20 years from 1990 to 2000 versus 2000 to 2017 (graph subsetting to +/- 50%)

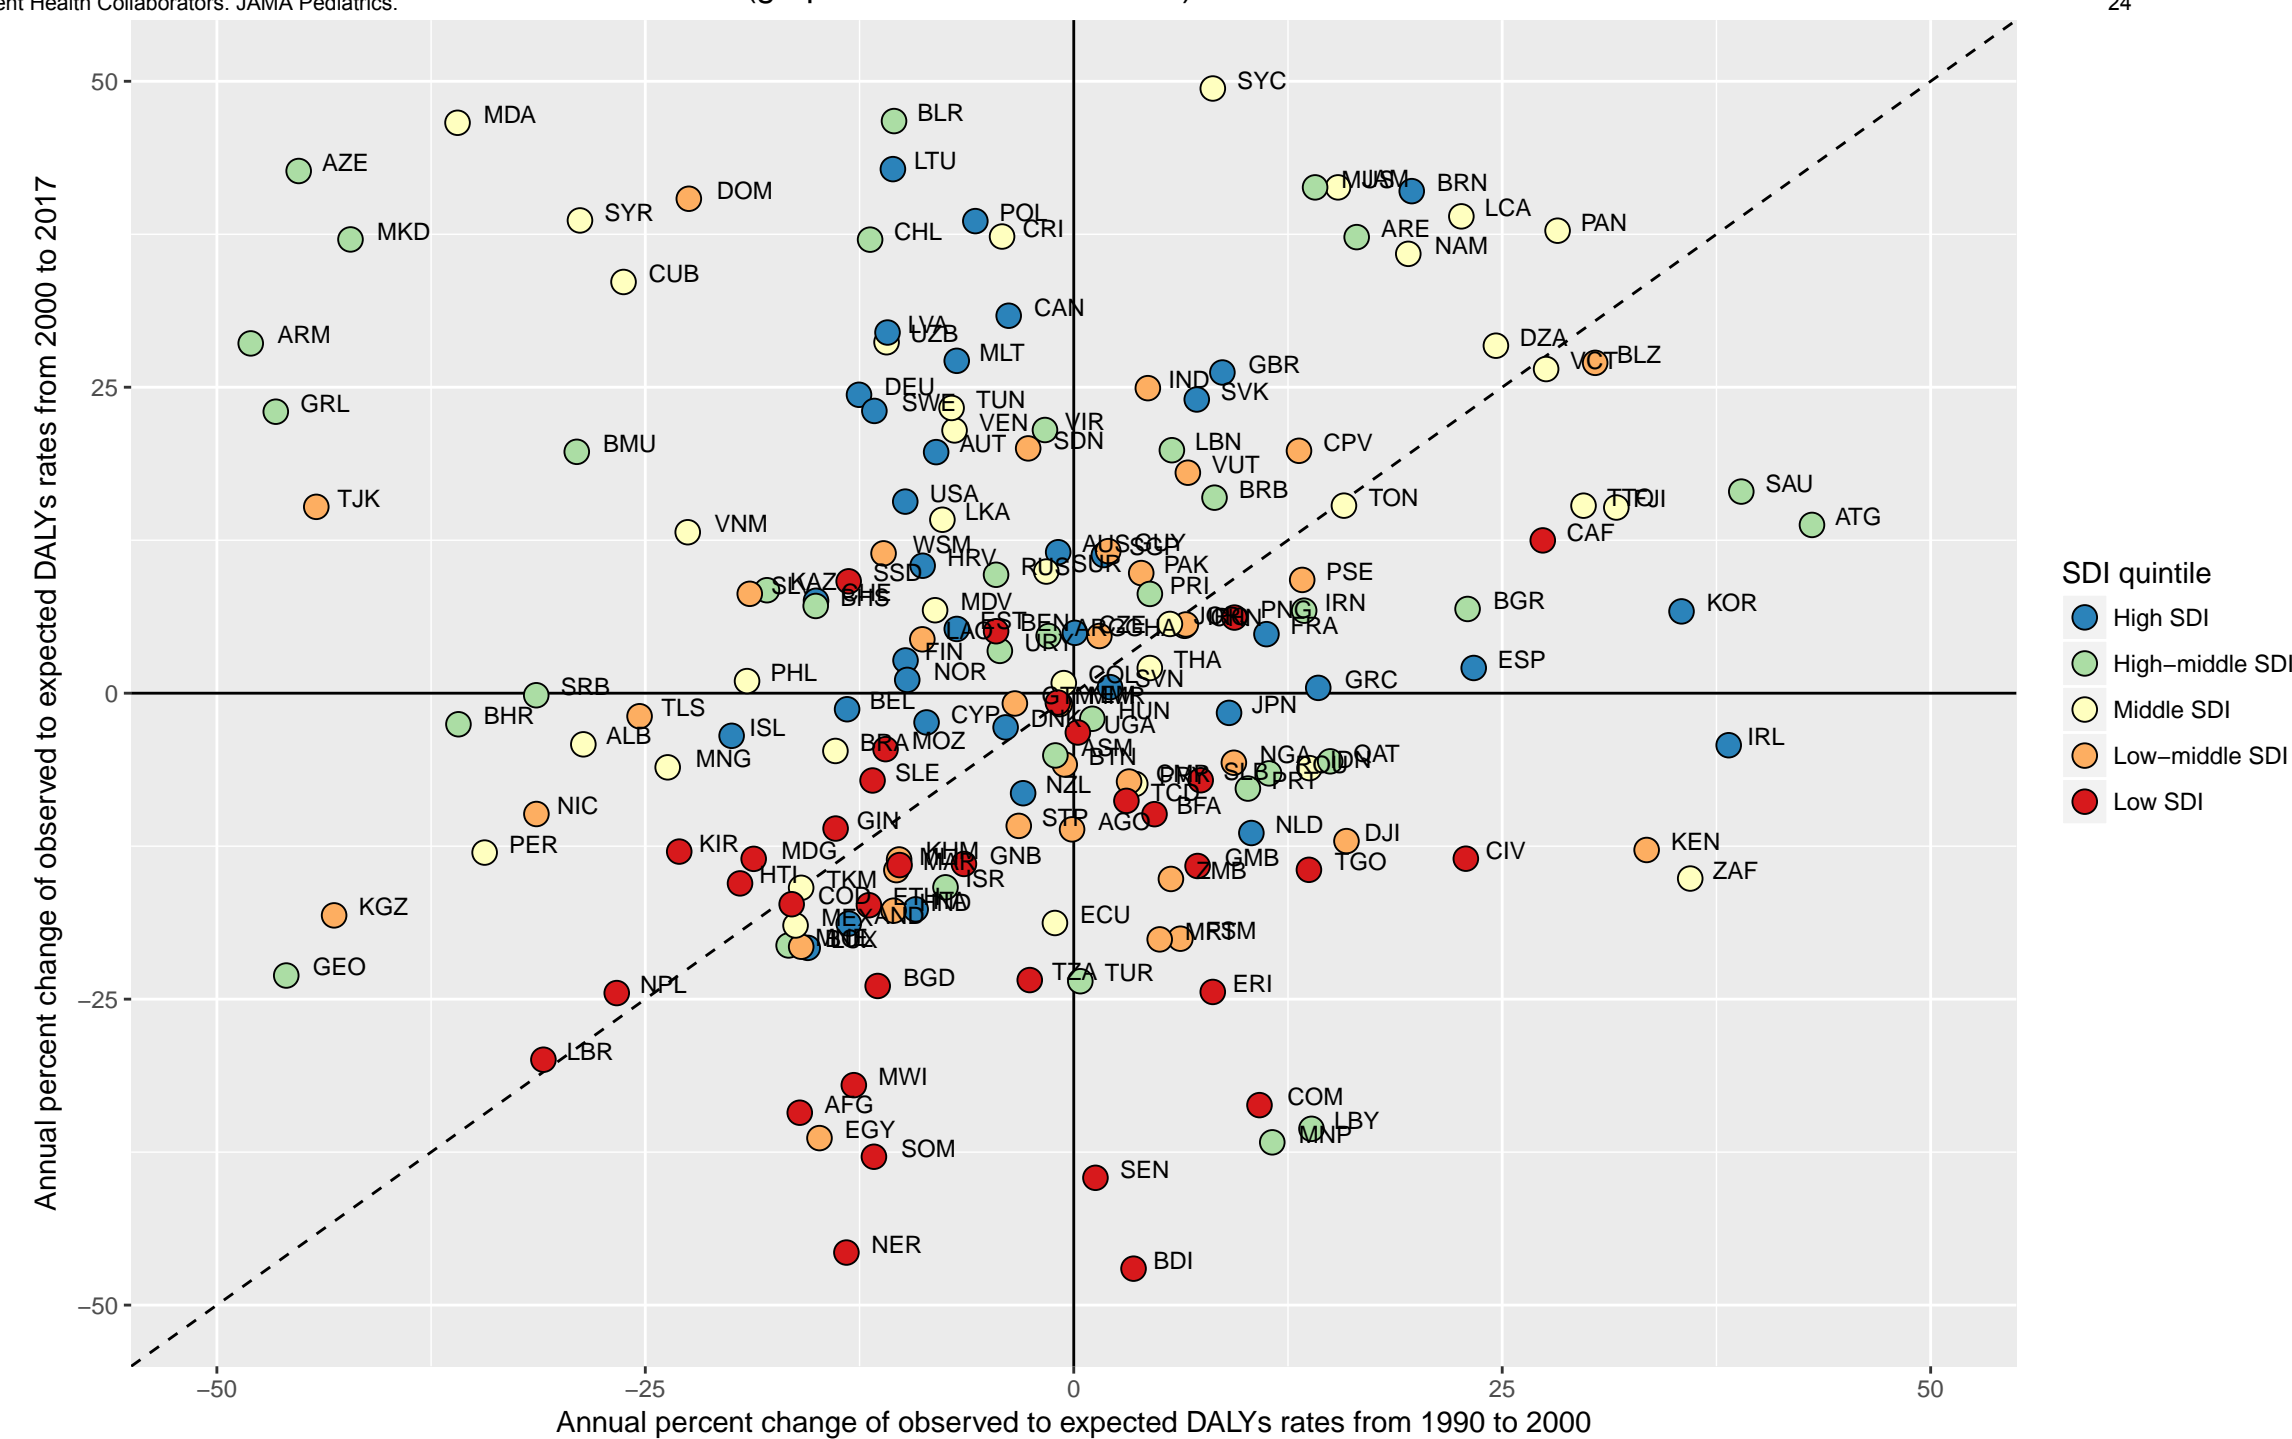

eFigure 6c. Annual percent change of observed to expected (O:E) all-cause DALY rates in <20 years from 1990 to 2000 versus 2000 to 2017

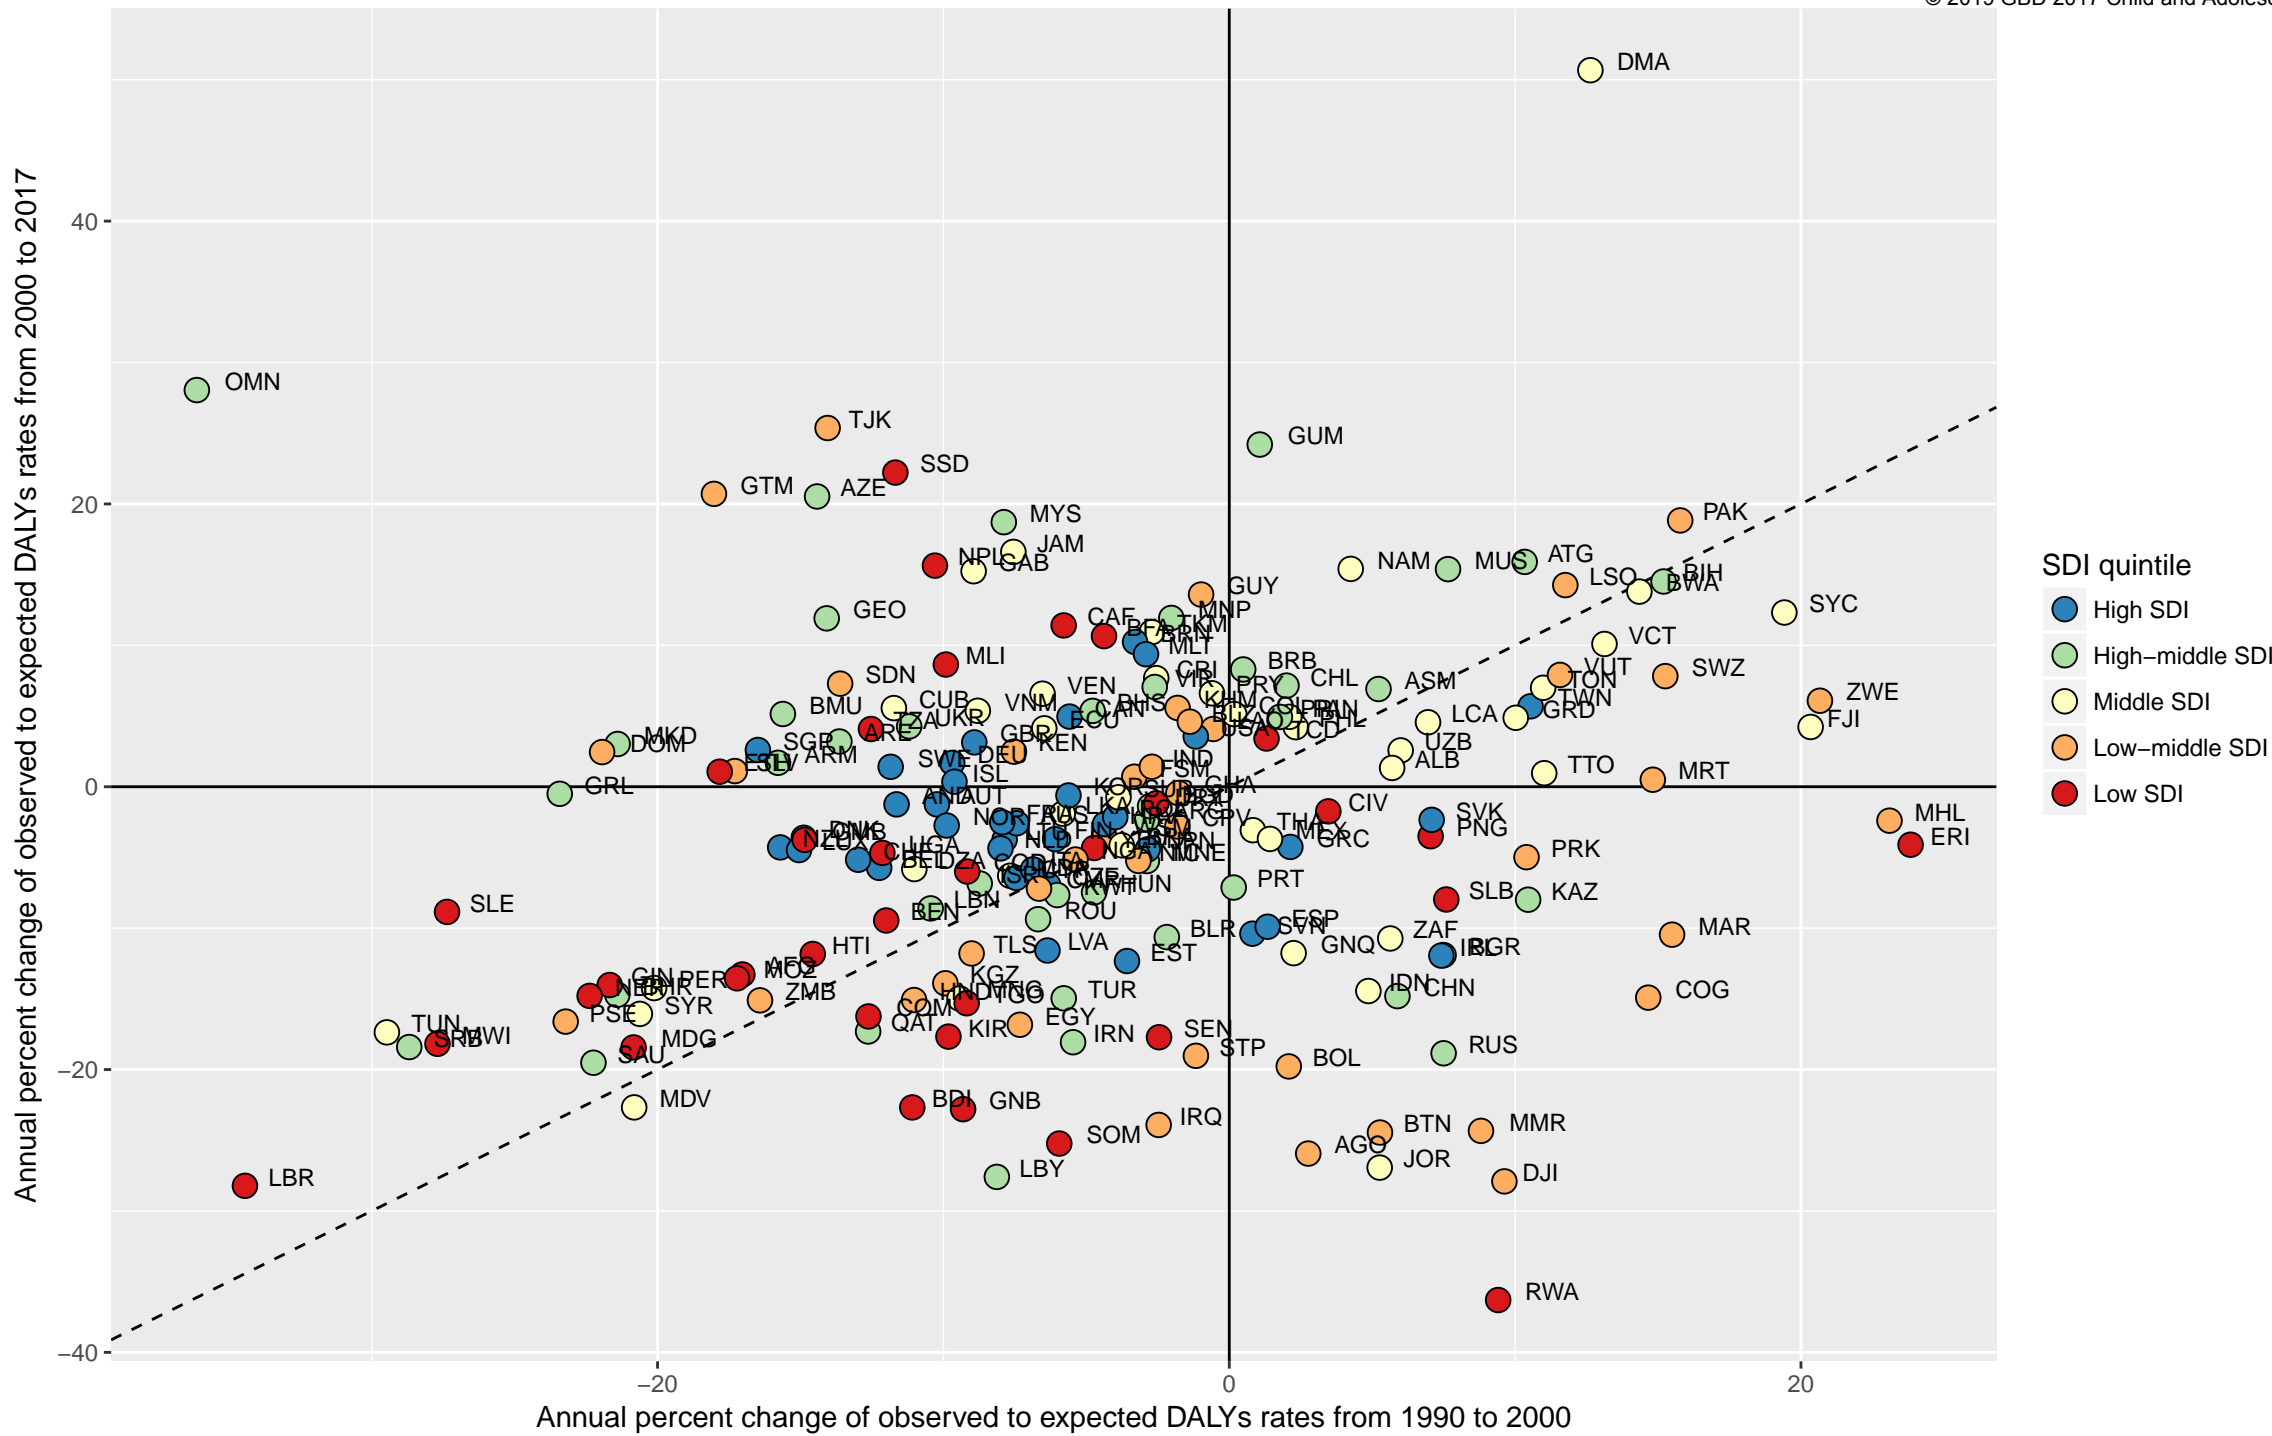

eFigure 6c. Annual percent change of observed to expected (O:E) all-cause DALY rates in <20 years from 1990 to 2000 versus 2000 to 2017 (graph subsetting to +/- 50%)

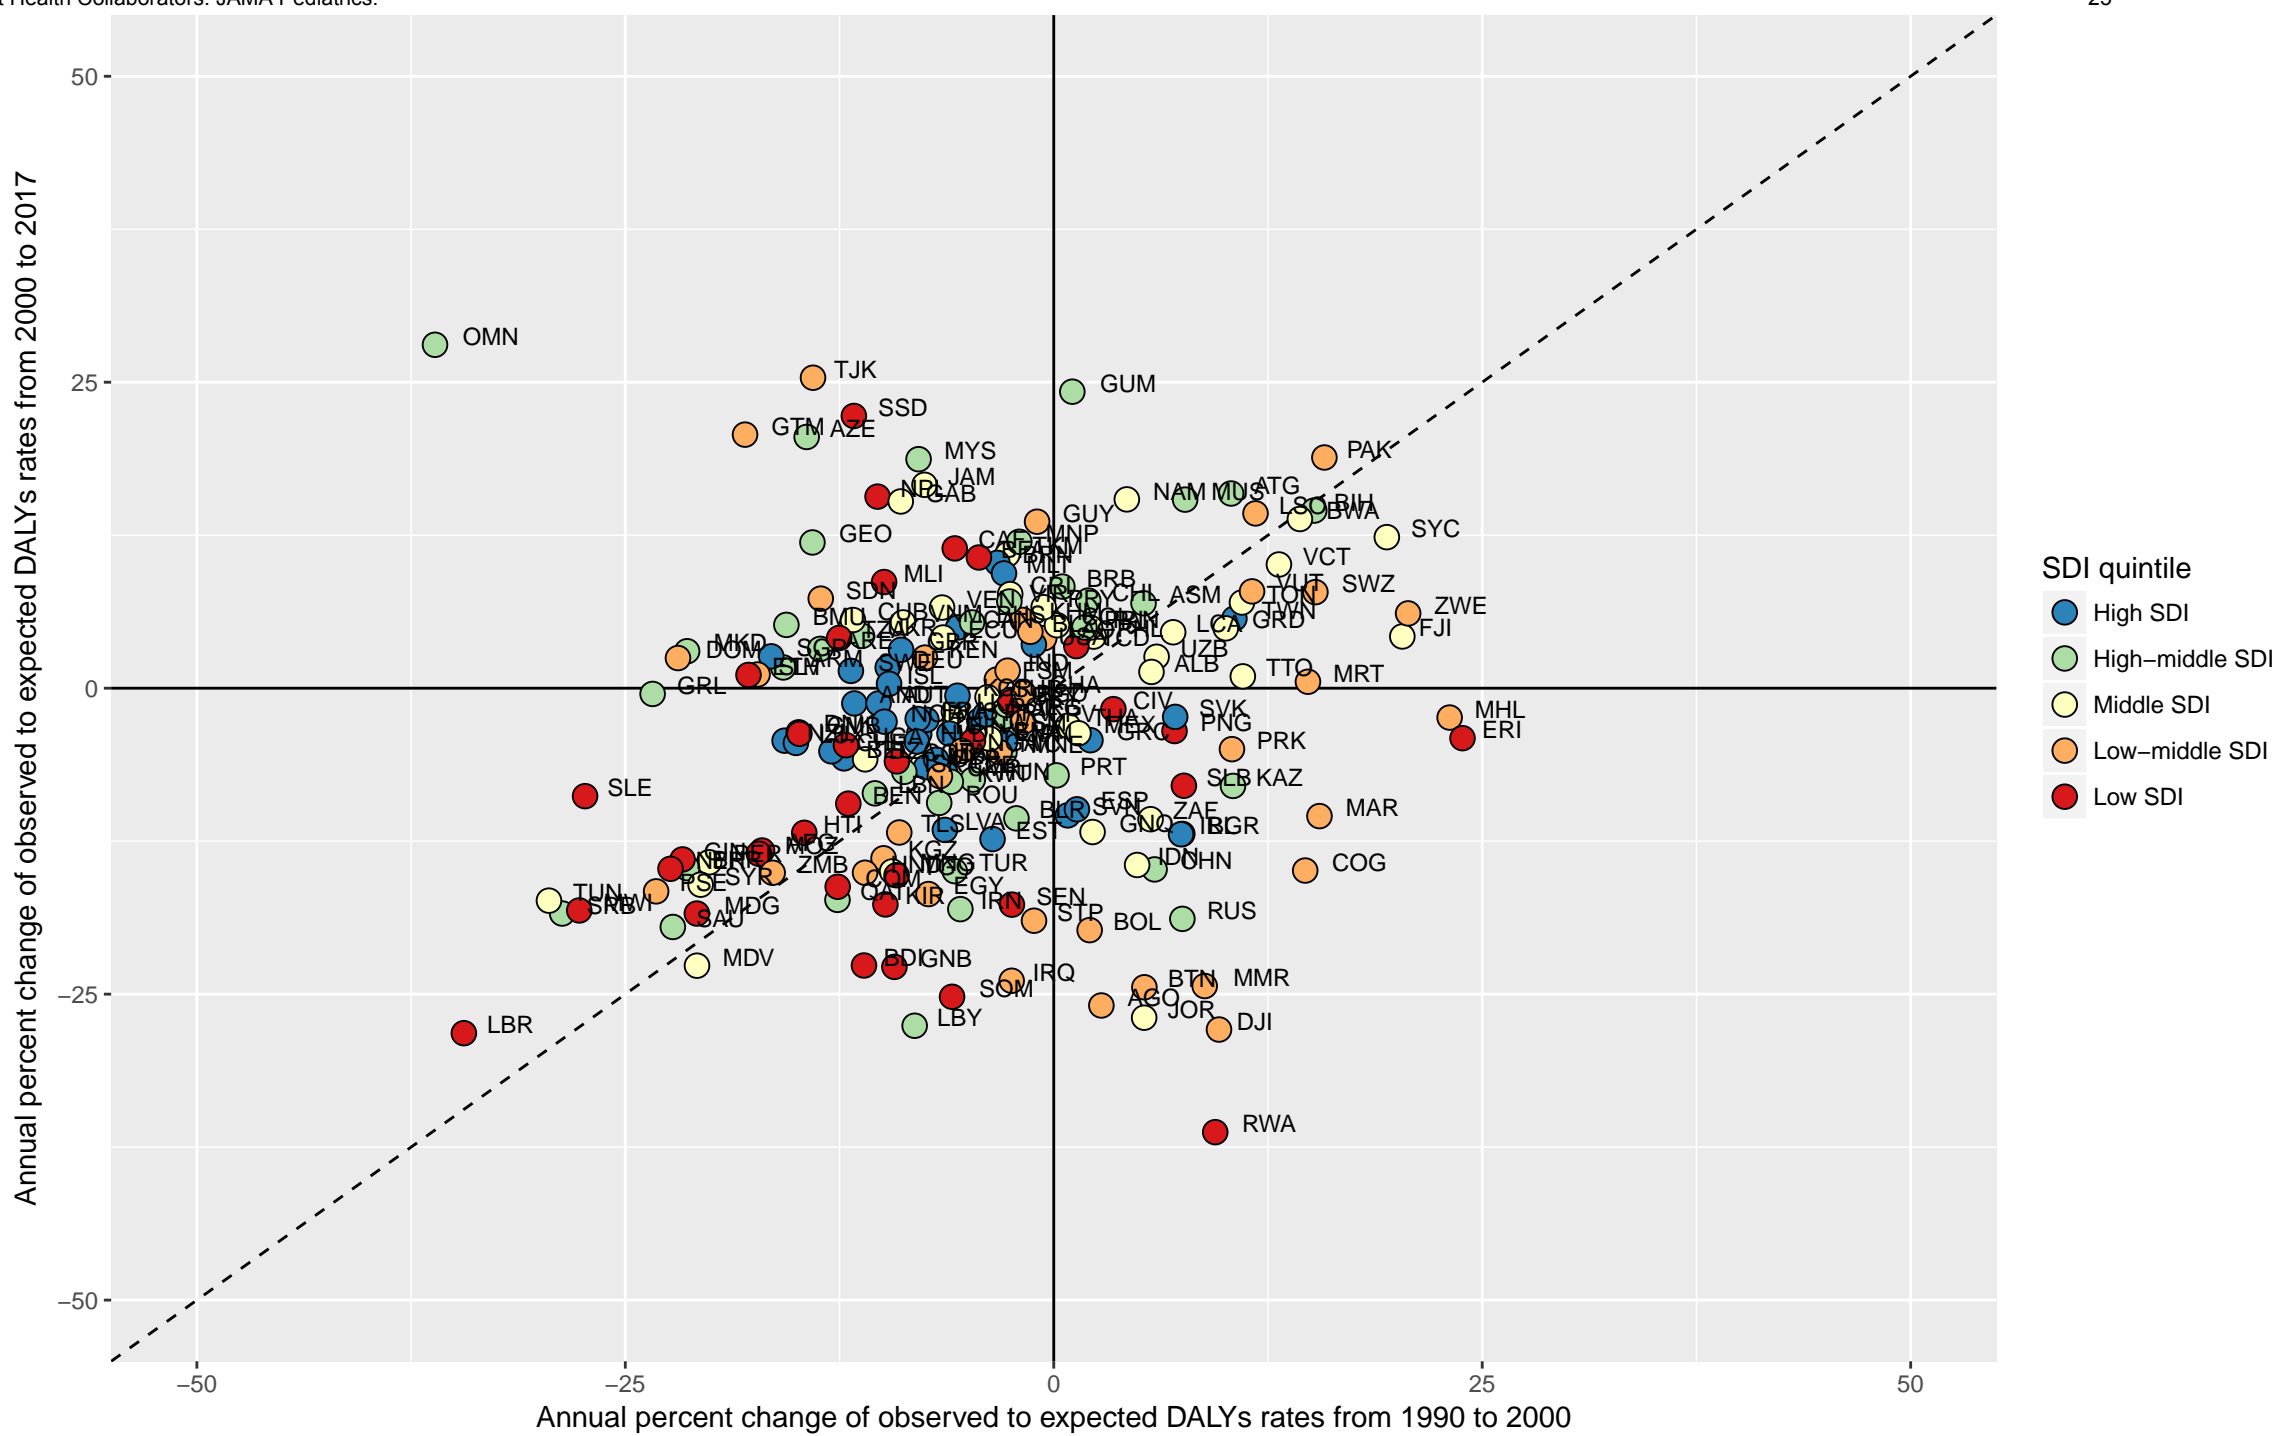

Annual percent change of observed versus expected (O:E) disability-adjusted life years (DALYs) rates by country for 1990 to 2000 versus 2000 to 2017 are plotted by country. In each pair of panels, the right panel focuses on changes within +/-50%. Panels a–d plot changes for all children and adolescents less than 20 years of age; panels e–h plot changes for children less than 1; panels i–l plot changes for children between 1 and 4; panels m–p plot changes for children between 5 and 9; and panels q–t plot changes for children between 10 and 19. For each age group, the first plot in the series is the all cause change in O:E rates (i.e., panels a, e, i, m, and q); the second plot in the series is the change in O:E rates associated with communicable, maternal, neonatal, and nutritional (CMNN) conditions (i.e., panels b, f, j, and r); the third plot in the series is the change in O:E rates associated with non-communicable diseases (NCDs – i.e., panels c, g, k, s); and the fourth plot in the series is the change in O:E rates associated with injuries (i.e., panels d, h, l, t). For each, countries in different socio-demographic index (SDI) quintiles are plotted with different countries. Abbreviations: DALY=disability-adjusted life year, AFG – Afghanistan, AGO – Angola, ALB – Albania, AND – Andorra, ARE – United Arab Emirates, ARG – Argentina, ARM – Armenia, ASM – American Samoa, ATG – Antigua and Barbuda, AUS – Australia, AUT – Austria, AZE – Azerbaijan, BDI – Burundi, BEL – Belgium, BEN – Benin, BFA – Burkina Faso, BGD – Bangladesh, BGR – Bulgaria, BHR – Bahrain, BHS – The Bahamas, BIH – Bosnia and Herzegovina, BLR – Belarus, BLZ – Belize, BMU – Bermuda, BOL – Bolivia, BRA – Brazil, BRB – Barbados, BRN – Brunei, BTN – Bhutan, BWA – Botswana, CAF – Central African Republic, CAN – Canada, CHE – Switzerland, CHL – Chile, CHN – China, CIV – Cote d'Ivoire, CMR – Cameroon, COD – Democratic Republic of the Congo, COG – Congo, COL – Colombia, COM – Comoros, CPV – Cape Verde, CRI – Costa Rica, CUB – Cuba, CYP – Cyprus, CZE – Czech Republic, DEU – Germany, DJI – Djibouti, DMA – Dominica, DNK – Denmark, DOM – Dominican Republic, DZA – Algeria, ECU – Ecuador, EGY – Egypt, ERI – Eritrea, ESP – Spain, EST – Estonia, ETH – Ethiopia, FIN – Finland, FJI – Fiji, FRA – France, FSM – Federated States of Micronesia, G – Global, GAB – Gabon, GBR – United Kingdom, GEO – Georgia, GHA – Ghana, GIN – Guinea, GMB – The Gambia, GNB – Guinea-Bissau, GNQ – Equatorial Guinea, GRC – Greece, GRD – Grenada, GRL – Greenland, GTM – Guatemala, GUM – Guam, GUY – Guyana, HND – Honduras, HRV – Croatia, HTI – Haiti, HUN – Hungary, IDN – Indonesia, IND – India, IRL – Ireland, IRN – Iran, IRQ – Iraq, ISL – Iceland, ISR – Israel, ITA – Italy, JAM – Jamaica, JOR – Jordan, JPN – Japan, KAZ – Kazakhstan, KEN – Kenya, KGZ – Kyrgyzstan, KHM – Cambodia, KIR – Kiribati, KOR – South Korea, KWT – Kuwait, LAO – Laos, LBN – Lebanon, LBR – Liberia, LBY – Libya, LCA – Saint Lucia, LKA – Sri Lanka, LSO – Lesotho, LTU – Lithuania, LUX – Luxembourg, LVA – Latvia, MAR – Morocco, MDA – Moldova, MDG – Madagascar, MDV – Maldives, MEX – Mexico, MHL – Marshall Islands, MKD – Macedonia, MLI – Mali, MLT – Malta, MMR – Myanmar, MNE – Montenegro, MNG – Mongolia, MNP – Northern Mariana Islands, MOZ – Mozambique, MRT – Mauritania, MUS – Mauritius, MWI – Malawi, MYS – Malaysia, NAM – Namibia, NER – Niger, NGA – Nigeria, NIC – Nicaragua, NLD – Netherlands, NOR – Norway, NPL – Nepal, NZL – New Zealand, OMN – Oman, PAK – Pakistan, PAN – Panama, PER – Peru, PHL – Philippines, PNG – Papua New Guinea, POL – Poland, PRI – Puerto Rico, PRK – North Korea, PRT – Portugal, PRY – Paraguay, PSE – Palestine, QAT – Qatar, ROU – Romania, RUS – Russian Federation, RWA – Rwanda, SAU – Saudi Arabia, SDN – Sudan, SEN – Senegal, SGP – Singapore, SLB – Solomon Islands, SLE – Sierra Leone, SLV – El Salvador, SOM – Somalia, SRB – Serbia, SSD – South Sudan, STP – Sao Tome and Principe, SUR – Suriname, SVK – Slovakia, SVN – Slovenia, SWE – Sweden, SWZ – Swaziland, SYC – Seychelles, SYR – Syria, TCD – Chad, TGO – Togo, THA – Thailand, TJK – Tajikistan, TKM – Turkmenistan, TLS – Timor-Leste, TON – Tonga, TTO – Trinidad and Tobago, TUN – Tunisia, TUR – Turkey, TWN – Taiwan, TZA – Tanzania, UGA – Uganda, UKR – Ukraine, URY – Uruguay, USA – United States, UZB – Uzbekistan, VCT – Saint Vincent and the Grenadines, VEN – Venezuela, VIR – Virgin Islands, U.S., VNM – Vietnam, VUT – Vanuatu, WSM – Samoa, YEM – Yemen, ZAF – South Africa, ZMB – Zambia, ZWE – Zimbabwe

eFigure 6d. Annual percent change of observed to expected (O:E) all-cause DALY rates in <20 years from 1990 to 2000 versus 2000 to 2017

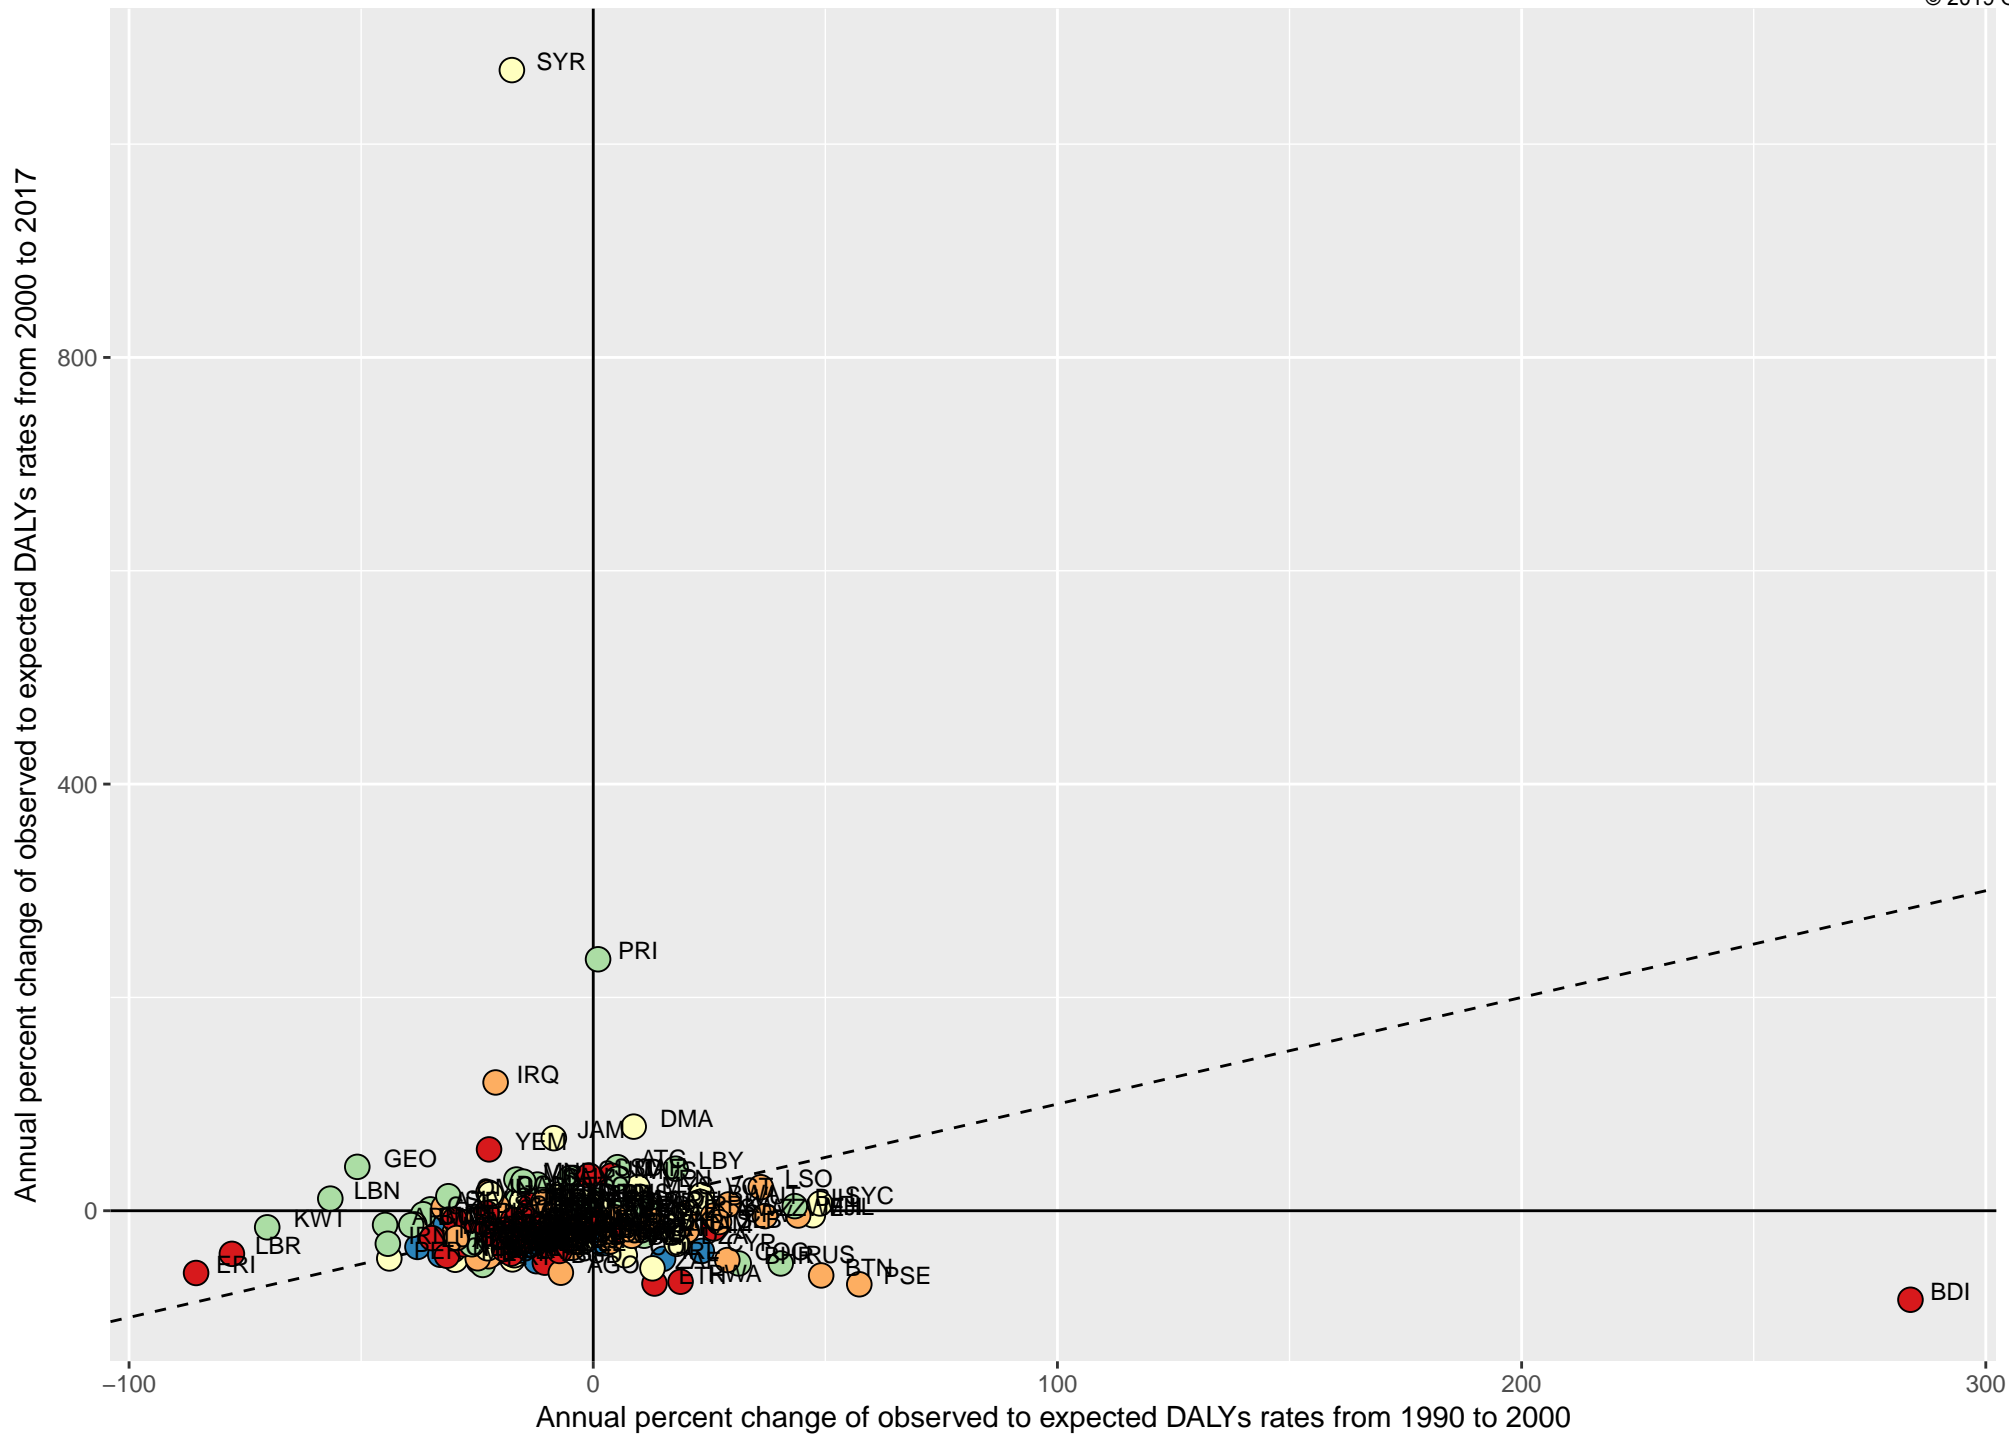

© 2019 GBD 2017 Child and Adolescent Health Collaborators. JAMA Pediatrics.

eFigure 6d. Annual percent change of observed to expected (O:E) all-cause DALY rates in <20 years from 1990 to 2000 versus 2000 to 2017 (graph subsetting to +/- 50%)

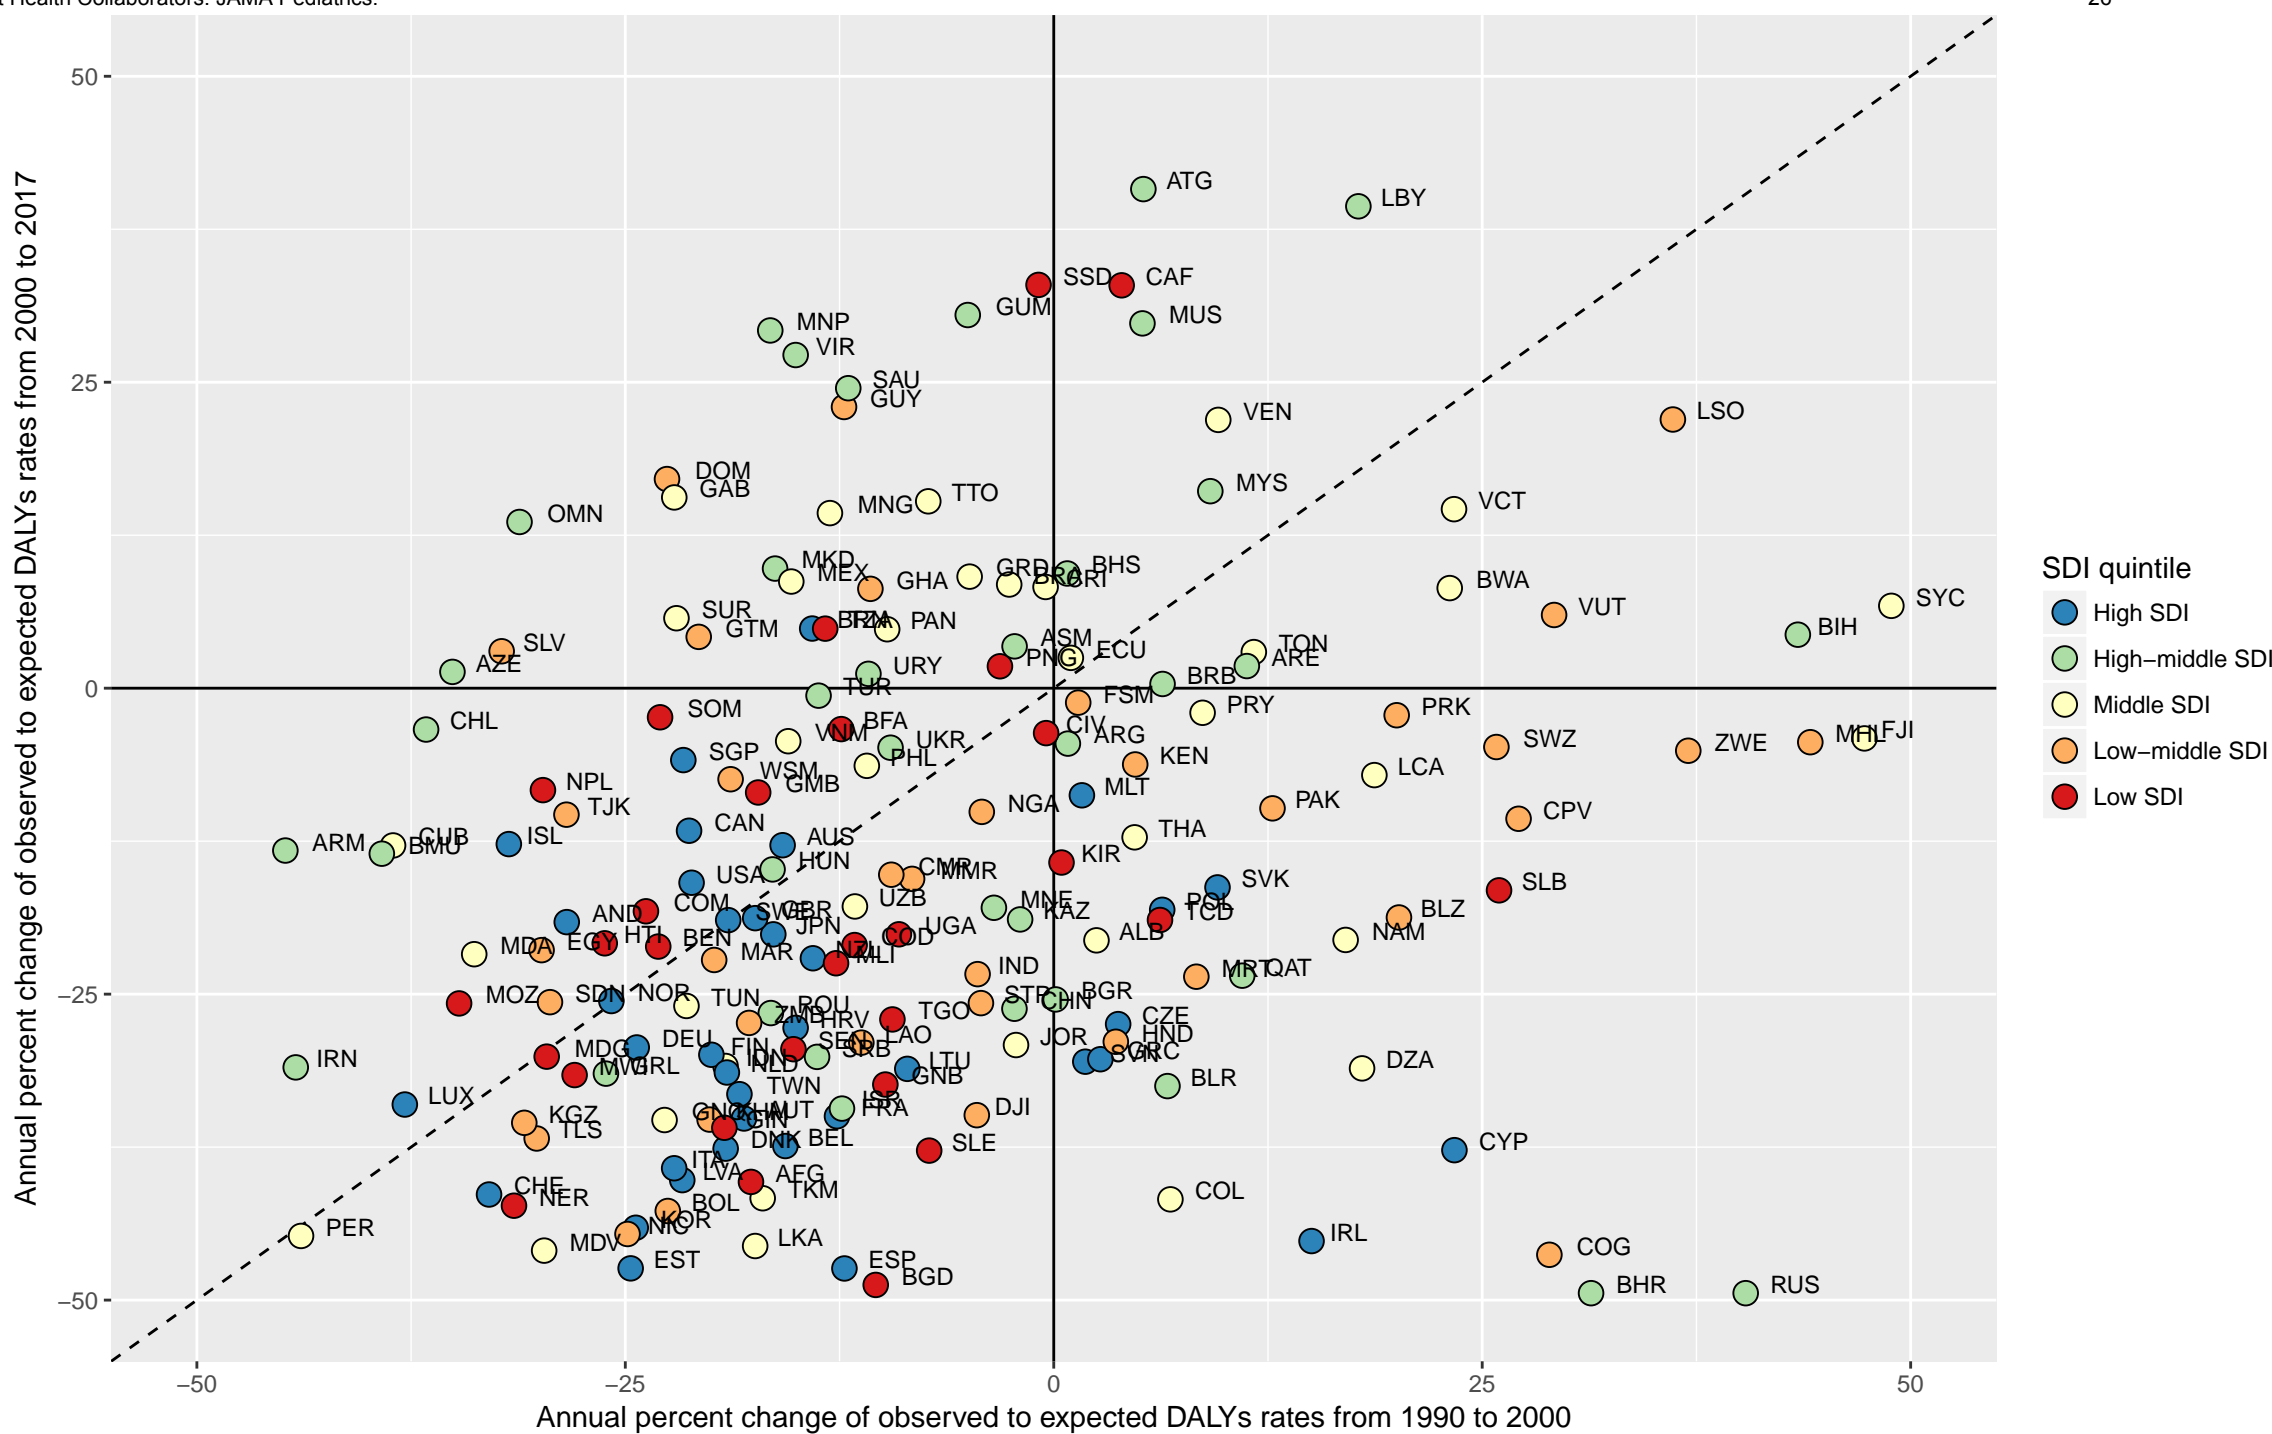

Annual percent change of observed versus expected (O:E) disability-adjusted life years (DALYs) rates by country for 1990 to 2000 versus 2000 to 2017 are plotted by country. In each pair of panels, the right panel focuses on changes within +/-50%. Panels a–d plot changes for all children and adolescents less than 20 years of age; panels e–h plot changes for children less than 1; panels i–l plot changes for children between 1 and 4; panels m–p plot changes for children between 5 and 9; and panels q–t plot changes for children between 10 and 19. For each age group, the first plot in the series is the all cause change in O:E rates (i.e., panels a, e, i, m, and q); the second plot in the series is the change in O:E rates associated with communicable, maternal, neonatal, and nutritional (CMNN) conditions (i.e., panels b, f, j, and r); the third plot in the series is the change in O:E rates associated with non-communicable diseases (NCDs – i.e., panels c, g, k, s); and the fourth plot in the series is the change in O:E rates associated with injuries (i.e., panels d, h, l, t). For each, countries in different socio-demographic index (SDI) quintiles are plotted with different countries. Abbreviations: DALY=disability-adjusted life year, AFG – Afghanistan, AGO – Angola, ALB – Albania, AND – Andorra, ARE – United Arab Emirates, ARG – Argentina, ARM – Armenia, ASM – American Samoa, ATG – Antigua and Barbuda, AUS – Australia, AUT – Austria, AZE – Azerbaijan, BDI – Burundi, BEL – Belgium, BEN – Benin, BFA – Burkina Faso, BGD – Bangladesh, BGR – Bulgaria, BHR – Bahrain, BHS – The Bahamas, BIH – Bosnia and Herzegovina, BLR – Belarus, BLZ – Belize, BMU – Bermuda, BOL – Bolivia, BRA – Brazil, BRB – Barbados, BRN – Brunei, BTN – Bhutan, BWA – Botswana, CAF – Central African Republic, CAN – Canada, CHE – Switzerland, CHL – Chile, CHN – China, CIV – Cote d'Ivoire, CMR – Cameroon, COD – Democratic Republic of the Congo, COG – Congo, COL – Colombia, COM – Comoros, CPV – Cape Verde, CRI – Costa Rica, CUB – Cuba, CYP – Cyprus, CZE – Czech Republic, DEU – Germany, DJI – Djibouti, DMA – Dominica, DNK – Denmark, DOM – Dominican Republic, DZA – Algeria, ECU – Ecuador, EGY – Egypt, ERI – Eritrea, ESP – Spain, EST – Estonia, ETH – Ethiopia, FIN – Finland, FJI – Fiji, FRA – France, FSM – Federated States of Micronesia, G – Global, GAB – Gabon, GBR – United Kingdom, GEO – Georgia, GHA – Ghana, GIN – Guinea, GMB – The Gambia, GNB – Guinea-Bissau, GNQ – Equatorial Guinea, GRC – Greece, GRD – Grenada, GRL – Greenland, GTM – Guatemala, GUM – Guam, GUY – Guyana, HND – Honduras, HRV – Croatia, HTI – Haiti, HUN – Hungary, IDN – Indonesia, IND – India, IRL – Ireland, IRN – Iran, IRQ – Iraq, ISL – Iceland, ISR – Israel, ITA – Italy, JAM – Jamaica, JOR – Jordan, JPN – Japan, KAZ – Kazakhstan, KEN – Kenya, KGZ – Kyrgyzstan, KHM – Cambodia, KIR – Kiribati, KOR – South Korea, KWT – Kuwait, LAO – Laos, LBN – Lebanon, LBR – Liberia, LBY – Libya, LCA – Saint Lucia, LKA – Sri Lanka, LSO – Lesotho, LTU – Lithuania, LUX – Luxembourg, LVA – Latvia, MAR – Morocco, MDA – Moldova, MDG – Madagascar, MDV – Maldives, MEX – Mexico, MHL – Marshall Islands, MKD – Macedonia, MLI – Mali, MLT – Malta, MMR – Myanmar, MNE – Montenegro, MNG – Mongolia, MNP – Northern Mariana Islands, MOZ – Mozambique, MRT – Mauritania, MUS – Mauritius, MWI – Malawi, MYS – Malaysia, NAM – Namibia, NER – Niger, NGA – Nigeria, NIC – Nicaragua, NLD – Netherlands, NOR – Norway, NPL – Nepal, NZL – New Zealand, OMN – Oman, PAK – Pakistan, PAN – Panama, PER – Peru, PHL – Philippines, PNG – Papua New Guinea, POL – Poland, PRI – Puerto Rico, PRK – North Korea, PRT – Portugal, PRY – Paraguay, PSE – Palestine, QAT – Qatar, ROU – Romania, RUS – Russian Federation, RWA – Rwanda, SAU – Saudi Arabia, SDN – Sudan, SEN – Senegal, SGP – Singapore, SLB – Solomon Islands, SLE – Sierra Leone, SLV – El Salvador, SOM – Somalia, SRB – Serbia, SSD – South Sudan, STP – Sao Tome and Principe, SUR – Suriname, SVK – Slovakia, SVN – Slovenia, SWE – Sweden, SWZ – Swaziland, SYC – Seychelles, SYR – Syria, TCD – Chad, TGO – Togo, THA – Thailand, TJK – Tajikistan, TKM – Turkmenistan, TLS – Timor-Leste, TON – Tonga, TTO – Trinidad and Tobago, TUN – Tunisia, TUR – Turkey, TWN – Taiwan, TZA – Tanzania, UGA – Uganda, UKR – Ukraine, URY – Uruguay, USA – United States, UZB – Uzbekistan, VCT – Saint Vincent and the Grenadines, VEN – Venezuela, VIR – Virgin Islands, U.S., VNM – Vietnam, VUT – Vanuatu, WSM – Samoa, YEM – Yemen, ZAF – South Africa, ZMB – Zambia, ZWE – Zimbabwe

eFigure 6e. Annual percent change of observed to expected (O:E) all-cause DALY rates in <20 years from 1990 to 2000 versus 2000 to 2017

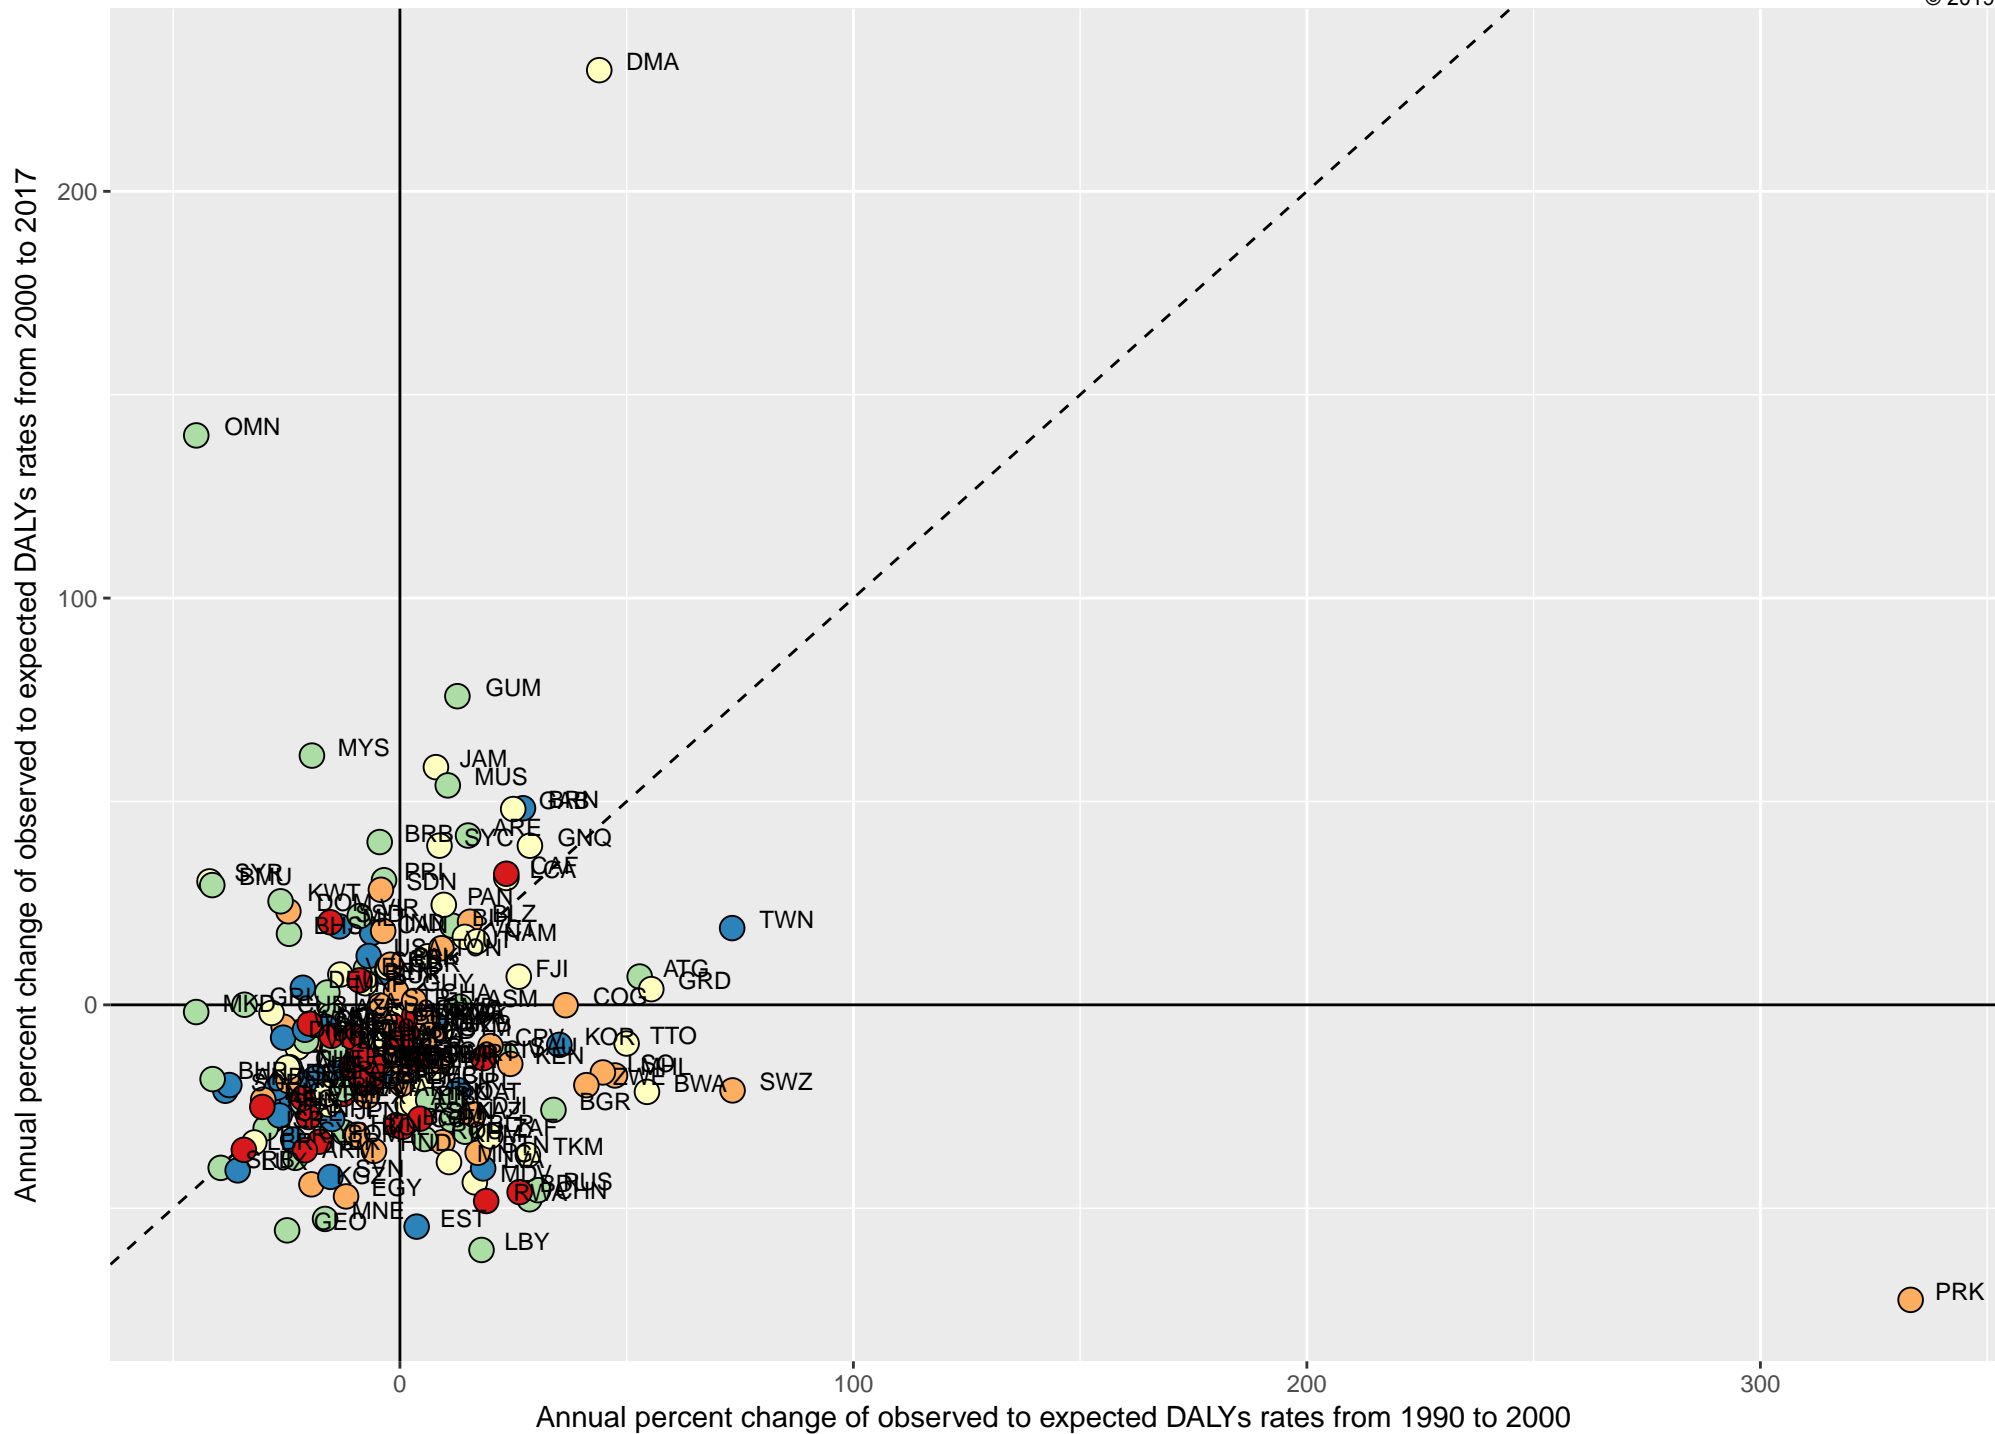

eFigure 6e. Annual percent change of observed to expected (O:E) all-cause DALY rates in <20 years from 1990 to 2000 versus 2000 to 2017 (graph subsetting to +/- 50%)

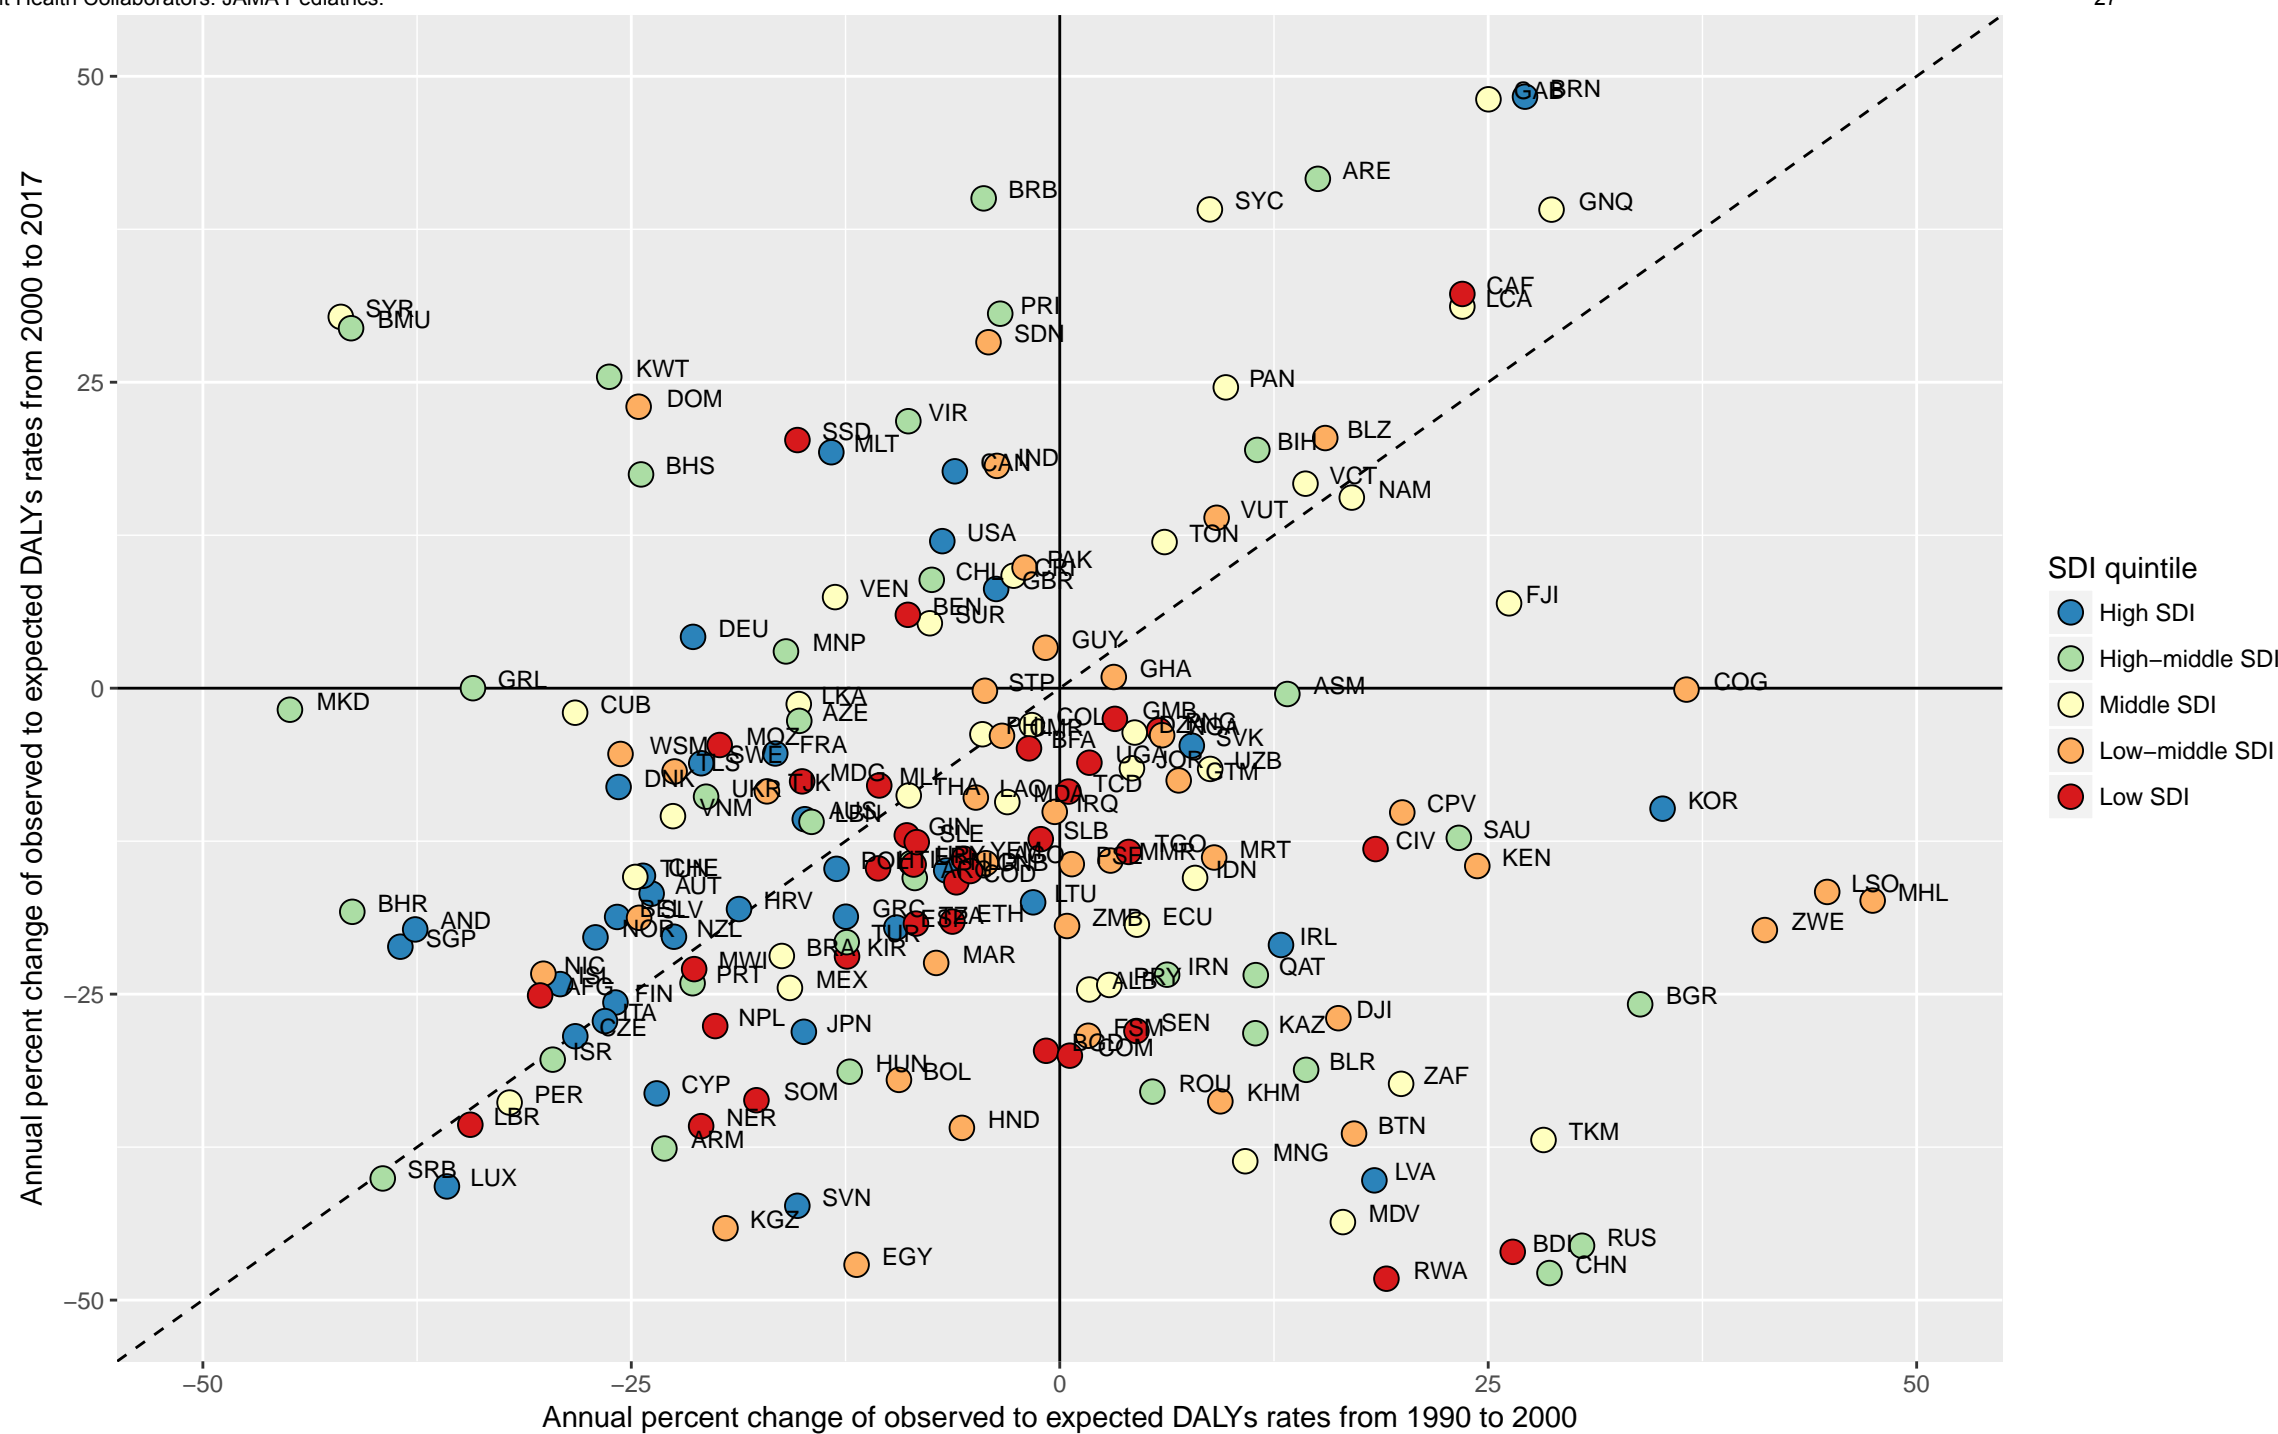

Annual percent change of observed versus expected (O:E) disability-adjusted life years (DALYs) rates by country for 1990 to 2000 versus 2000 to 2017 are plotted by country. In each pair of panels, the right panel focuses on changes within +/-50%. Panels a–d plot changes for all children and adolescents less than 20 years of age; panels e–h plot changes for children less than 1; panels i–l plot changes for children between 1 and 4; panels m–p plot changes for children between 5 and 9; and panels q–t plot changes for children between 10 and 19. For each age group, the first plot in the series is the all cause change in O:E rates (i.e., panels a, e, i, m, and q); the second plot in the series is the change in O:E rates associated with communicable, maternal, neonatal, and nutritional (CMNN) conditions (i.e., panels b, f, j, and r); the third plot in the series is the change in O:E rates associated with non-communicable diseases (NCDs – i.e., panels c, g, k, s); and the fourth plot in the series is the change in O:E rates associated with injuries (i.e., panels d, h, l, t). For each, countries in different socio-demographic index (SDI) quintiles are plotted with different countries. Abbreviations: DALY=disability-adjusted life year, AFG – Afghanistan, AGO – Angola, ALB – Albania, AND – Andorra, ARE – United Arab Emirates, ARG – Argentina, ARM – Armenia, ASM – American Samoa, ATG – Antigua and Barbuda, AUS – Australia, AUT – Austria, AZE – Azerbaijan, BDI – Burundi, BEL – Belgium, BEN – Benin, BFA – Burkina Faso, BGD – Bangladesh, BGR – Bulgaria, BHR – Bahrain, BHS – The Bahamas, BIH – Bosnia and Herzegovina, BLR – Belarus, BLZ – Belize, BMU – Bermuda, BOL – Bolivia, BRA – Brazil, BRB – Barbados, BRN – Brunei, BTN – Bhutan, BWA – Botswana, CAF – Central African Republic, CAN – Canada, CHE – Switzerland, CHL – Chile, CHN – China, CIV – Cote d'Ivoire, CMR – Cameroon, COD – Democratic Republic of the Congo, COG – Congo, COL – Colombia, COM – Comoros, CPV – Cape Verde, CRI – Costa Rica, CUB – Cuba, CYP – Cyprus, CZE – Czech Republic, DEU – Germany, DJI – Djibouti, DMA – Dominica, DNK – Denmark, DOM – Dominican Republic, DZA – Algeria, ECU – Ecuador, EGY – Egypt, ERI – Eritrea, ESP – Spain, EST – Estonia, ETH – Ethiopia, FIN – Finland, FJI – Fiji, FRA – France, FSM – Federated States of Micronesia, G – Global, GAB – Gabon, GBR – United Kingdom, GEO – Georgia, GHA – Ghana, GIN – Guinea, GMB – The Gambia, GNB – Guinea-Bissau, GNQ – Equatorial Guinea, GRC – Greece, GRD – Grenada, GRL – Greenland, GTM – Guatemala, GUM – Guam, GUY – Guyana, HND – Honduras, HRV – Croatia, HTI – Haiti, HUN – Hungary, IDN – Indonesia, IND – India, IRL – Ireland, IRN – Iran, IRQ – Iraq, ISL – Iceland, ISR – Israel, ITA – Italy, JAM – Jamaica, JOR – Jordan, JPN – Japan, KAZ – Kazakhstan, KEN – Kenya, KGZ – Kyrgyzstan, KHM – Cambodia, KIR – Kiribati, KOR – South Korea, KWT – Kuwait, LAO – Laos, LBN – Lebanon, LBR – Liberia, LBY – Libya, LCA – Saint Lucia, LKA – Sri Lanka, LSO – Lesotho, LTU – Lithuania, LUX – Luxembourg, LVA – Latvia, MAR – Morocco, MDA – Moldova, MDG – Madagascar, MDV – Maldives, MEX – Mexico, MHL – Marshall Islands, MKD – Macedonia, MLI – Mali, MLT – Malta, MMR – Myanmar, MNE – Montenegro, MNG – Mongolia, MNP – Northern Mariana Islands, MOZ – Mozambique, MRT – Mauritania, MUS – Mauritius, MWI – Malawi, MYS – Malaysia, NAM – Namibia, NER – Niger, NGA – Nigeria, NIC – Nicaragua, NLD – Netherlands, NOR – Norway, NPL – Nepal, NZL – New Zealand, OMN – Oman, PAK – Pakistan, PAN – Panama, PER – Peru, PHL – Philippines, PNG – Papua New Guinea, POL – Poland, PRI – Puerto Rico, PRK – North Korea, PRT – Portugal, PRY – Paraguay, PSE – Palestine, QAT – Qatar, ROU – Romania, RUS – Russian Federation, RWA – Rwanda, SAU – Saudi Arabia, SDN – Sudan, SEN – Senegal, SGP – Singapore, SLB – Solomon Islands, SLE – Sierra Leone, SLV – El Salvador, SOM – Somalia, SRB – Serbia, SSD – South Sudan, STP – Sao Tome and Principe, SUR – Suriname, SVK – Slovakia, SVN – Slovenia, SWE – Sweden, SWZ – Swaziland, SYC – Seychelles, SYR – Syria, TCD – Chad, TGO – Togo, THA – Thailand, TJK – Tajikistan, TKM – Turkmenistan, TLS – Timor-Leste, TON – Tonga, TTO – Trinidad and Tobago, TUN – Tunisia, TUR – Turkey, TWN – Taiwan, TZA – Tanzania, UGA – Uganda, UKR – Ukraine, URY – Uruguay, USA – United States, UZB – Uzbekistan, VCT – Saint Vincent and the Grenadines, VEN – Venezuela, VIR – Virgin Islands, U.S., VNM – Vietnam, VUT – Vanuatu, WSM – Samoa, YEM – Yemen, ZAF – South Africa, ZMB – Zambia, ZWE – Zimbabwe

eFigure 6f. Annual percent change of observed to expected (O:E) all-cause DALY rates in <20 years from 1990 to 2000 versus 2000 to 2017

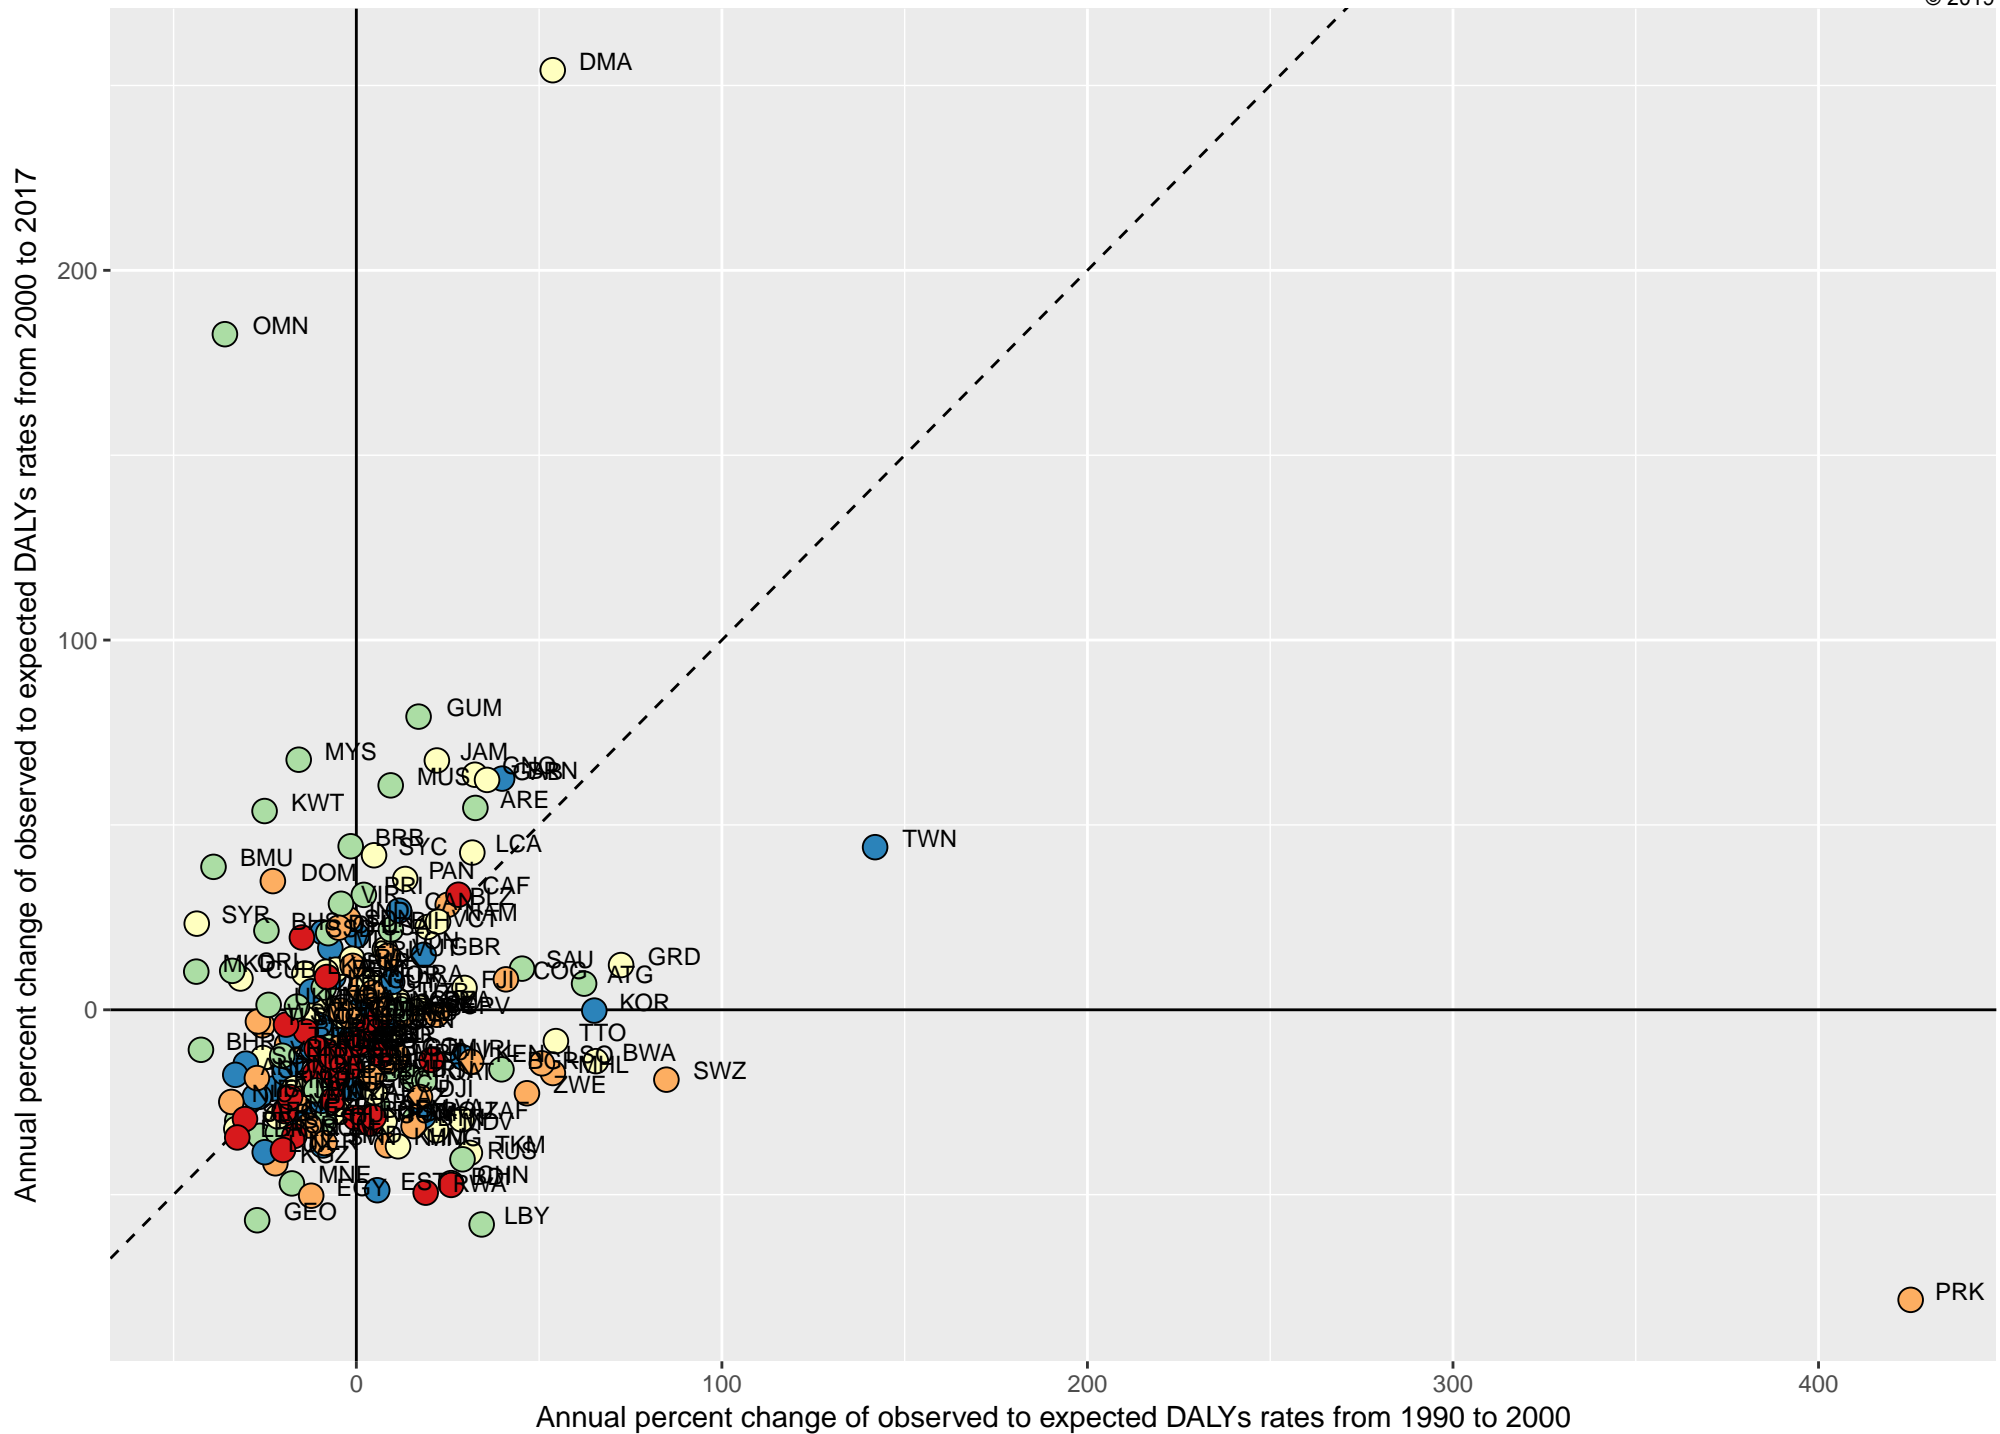

© 2019 GBD 2017 Child and Adolescent Health Collaborators. JAMA Pediatrics.

eFigure 6f. Annual percent change of observed to expected (O:E) all-cause DALY rates in <20 years from 1990 to 2000 versus 2000 to 2017 (graph subsetting to +/- 50%)

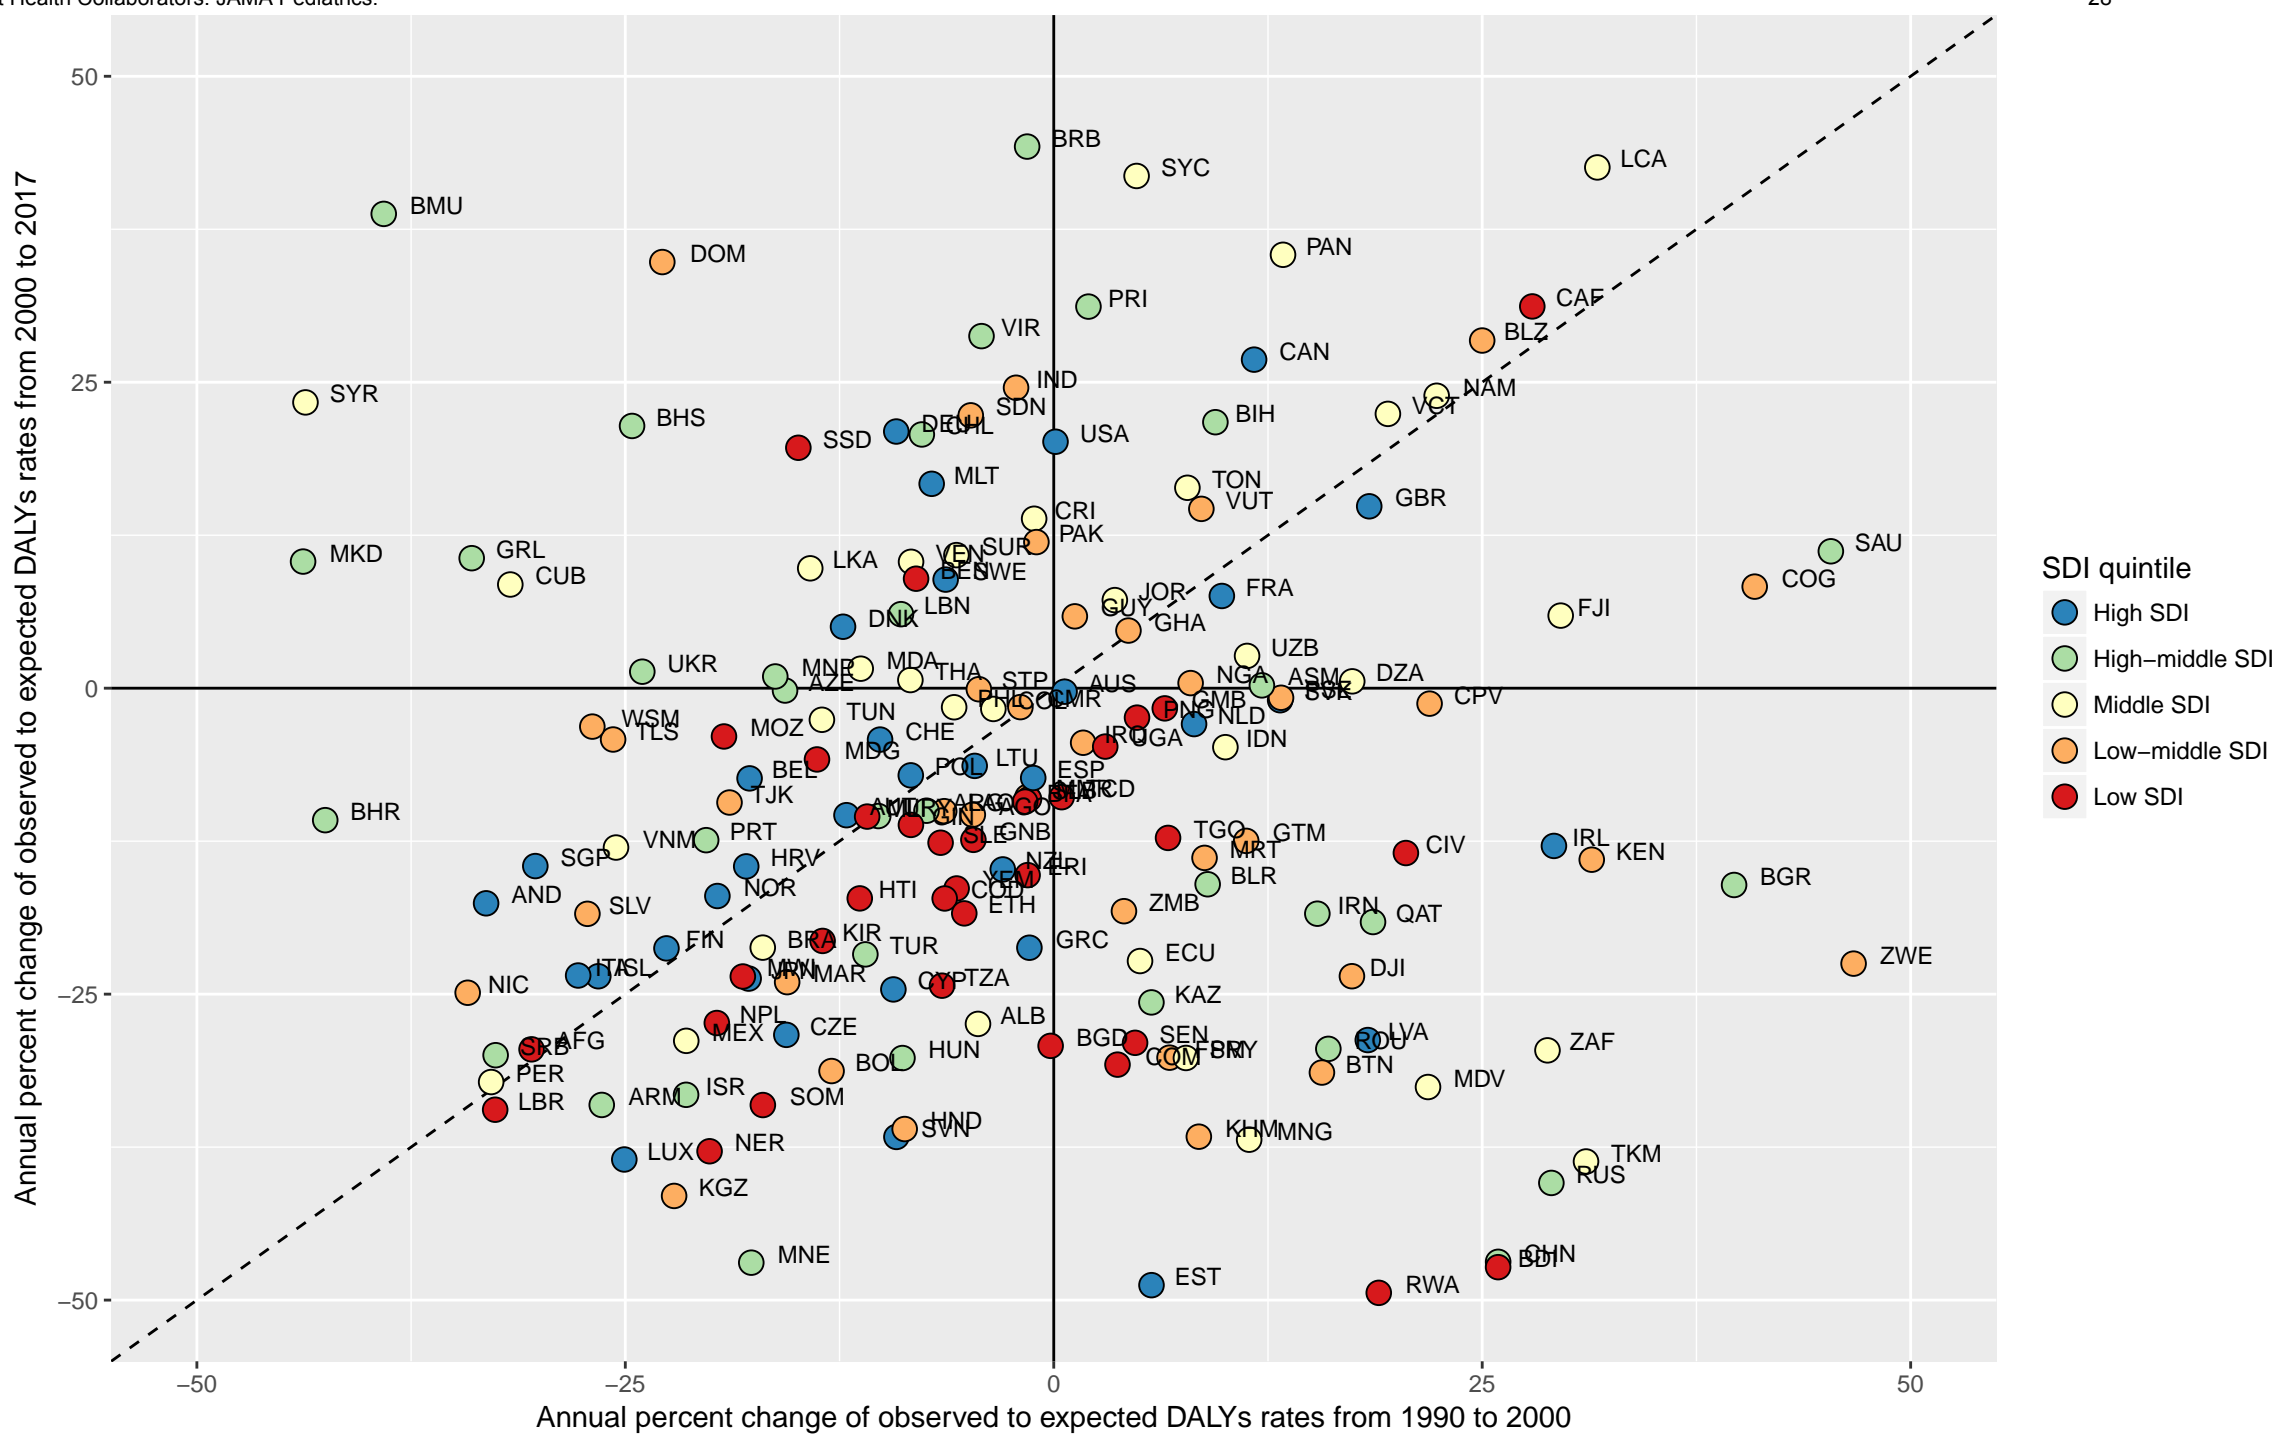

28

Annual percent change of observed versus expected (O:E) disability-adjusted life years (DALYs) rates by country for 1990 to 2000 versus 2000 to 2017 are plotted by country. In each pair of panels, the right panel focuses on changes within +/-50%. Panels a–d plot changes for all children and adolescents less than 20 years of age; panels e–h plot changes for children less than 1; panels i–l plot changes for children between 1 and 4; panels m–p plot changes for children between 5 and 9; and panels q–t plot changes for children between 10 and 19. For each age group, the first plot in the series is the all cause change in O:E rates (i.e., panels a, e, i, m, and q); the second plot in the series is the change in O:E rates associated with communicable, maternal, neonatal, and nutritional (CMNN) conditions (i.e., panels b, f, j, and r); the third plot in the series is the change in O:E rates associated with non-communicable diseases (NCDs – i.e., panels c, g, k, s); and the fourth plot in the series is the change in O:E rates associated with injuries (i.e., panels d, h, l, t). For each, countries in different socio-demographic index (SDI) quintiles are plotted with different countries. Abbreviations: DALY=disability-adjusted life year, AFG – Afghanistan, AGO – Angola, ALB – Albania, AND – Andorra, ARE – United Arab Emirates, ARG – Argentina, ARM – Armenia, ASM – American Samoa, ATG – Antigua and Barbuda, AUS – Australia, AUT – Austria, AZE – Azerbaijan, BDI – Burundi, BEL – Belgium, BEN – Benin, BFA – Burkina Faso, BGD – Bangladesh, BGR – Bulgaria, BHR – Bahrain, BHS – The Bahamas, BIH – Bosnia and Herzegovina, BLR – Belarus, BLZ – Belize, BMU – Bermuda, BOL – Bolivia, BRA – Brazil, BRB – Barbados, BRN – Brunei, BTN – Bhutan, BWA – Botswana, CAF – Central African Republic, CAN – Canada, CHE – Switzerland, CHL – Chile, CHN – China, CIV – Cote d'Ivoire, CMR – Cameroon, COD – Democratic Republic of the Congo, COG – Congo, COL – Colombia, COM – Comoros, CPV – Cape Verde, CRI – Costa Rica, CUB – Cuba, CYP – Cyprus, CZE – Czech Republic, DEU – Germany, DJI – Djibouti, DMA – Dominica, DNK – Denmark, DOM – Dominican Republic, DZA – Algeria, ECU – Ecuador, EGY – Egypt, ERI – Eritrea, ESP – Spain, EST – Estonia, ETH – Ethiopia, FIN – Finland, FJI – Fiji, FRA – France, FSM – Federated States of Micronesia, G – Global, GAB – Gabon, GBR – United Kingdom, GEO – Georgia, GHA – Ghana, GIN – Guinea, GMB – The Gambia, GNB – Guinea-Bissau, GNQ – Equatorial Guinea, GRC – Greece, GRD – Grenada, GRL – Greenland, GTM – Guatemala, GUM – Guam, GUY – Guyana, HND – Honduras, HRV – Croatia, HTI – Haiti, HUN – Hungary, IDN – Indonesia, IND – India, IRL – Ireland, IRN – Iran, IRQ – Iraq, ISL – Iceland, ISR – Israel, ITA – Italy, JAM – Jamaica, JOR – Jordan, JPN – Japan, KAZ – Kazakhstan, KEN – Kenya, KGZ – Kyrgyzstan, KHM – Cambodia, KIR – Kiribati, KOR – South Korea, KWT – Kuwait, LAO – Laos, LBN – Lebanon, LBR – Liberia, LBY – Libya, LCA – Saint Lucia, LKA – Sri Lanka, LSO – Lesotho, LTU – Lithuania, LUX – Luxembourg, LVA – Latvia, MAR – Morocco, MDA – Moldova, MDG – Madagascar, MDV – Maldives, MEX – Mexico, MHL – Marshall Islands, MKD – Macedonia, MLI – Mali, MLT – Malta, MMR – Myanmar, MNE – Montenegro, MNG – Mongolia, MNP – Northern Mariana Islands, MOZ – Mozambique, MRT – Mauritania, MUS – Mauritius, MWI – Malawi, MYS – Malaysia, NAM – Namibia, NER – Niger, NGA – Nigeria, NIC – Nicaragua, NLD – Netherlands, NOR – Norway, NPL – Nepal, NZL – New Zealand, OMN – Oman, PAK – Pakistan, PAN – Panama, PER – Peru, PHL – Philippines, PNG – Papua New Guinea, POL – Poland, PRI – Puerto Rico, PRK – North Korea, PRT – Portugal, PRY – Paraguay, PSE – Palestine, QAT – Qatar, ROU – Romania, RUS – Russian Federation, RWA – Rwanda, SAU – Saudi Arabia, SDN – Sudan, SEN – Senegal, SGP – Singapore, SLB – Solomon Islands, SLE – Sierra Leone, SLV – El Salvador, SOM – Somalia, SRB – Serbia, SSD – South Sudan, STP – Sao Tome and Principe, SUR – Suriname, SVK – Slovakia, SVN – Slovenia, SWE – Sweden, SWZ – Swaziland, SYC – Seychelles, SYR – Syria, TCD – Chad, TGO – Togo, THA – Thailand, TJK – Tajikistan, TKM – Turkmenistan, TLS – Timor-Leste, TON – Tonga, TTO – Trinidad and Tobago, TUN – Tunisia, TUR – Turkey, TWN – Taiwan, TZA – Tanzania, UGA – Uganda, UKR – Ukraine, URY – Uruguay, USA – United States, UZB – Uzbekistan, VCT – Saint Vincent and the Grenadines, VEN – Venezuela, VIR – Virgin Islands, U.S., VNM – Vietnam, VUT – Vanuatu, WSM – Samoa, YEM – Yemen, ZAF – South Africa, ZMB – Zambia, ZWE – Zimbabwe

eFigure 6g. Annual percent change of observed to expected (O:E) all-cause DALY rates in <20 years from 1990 to 2000 versus 2000 to 2017

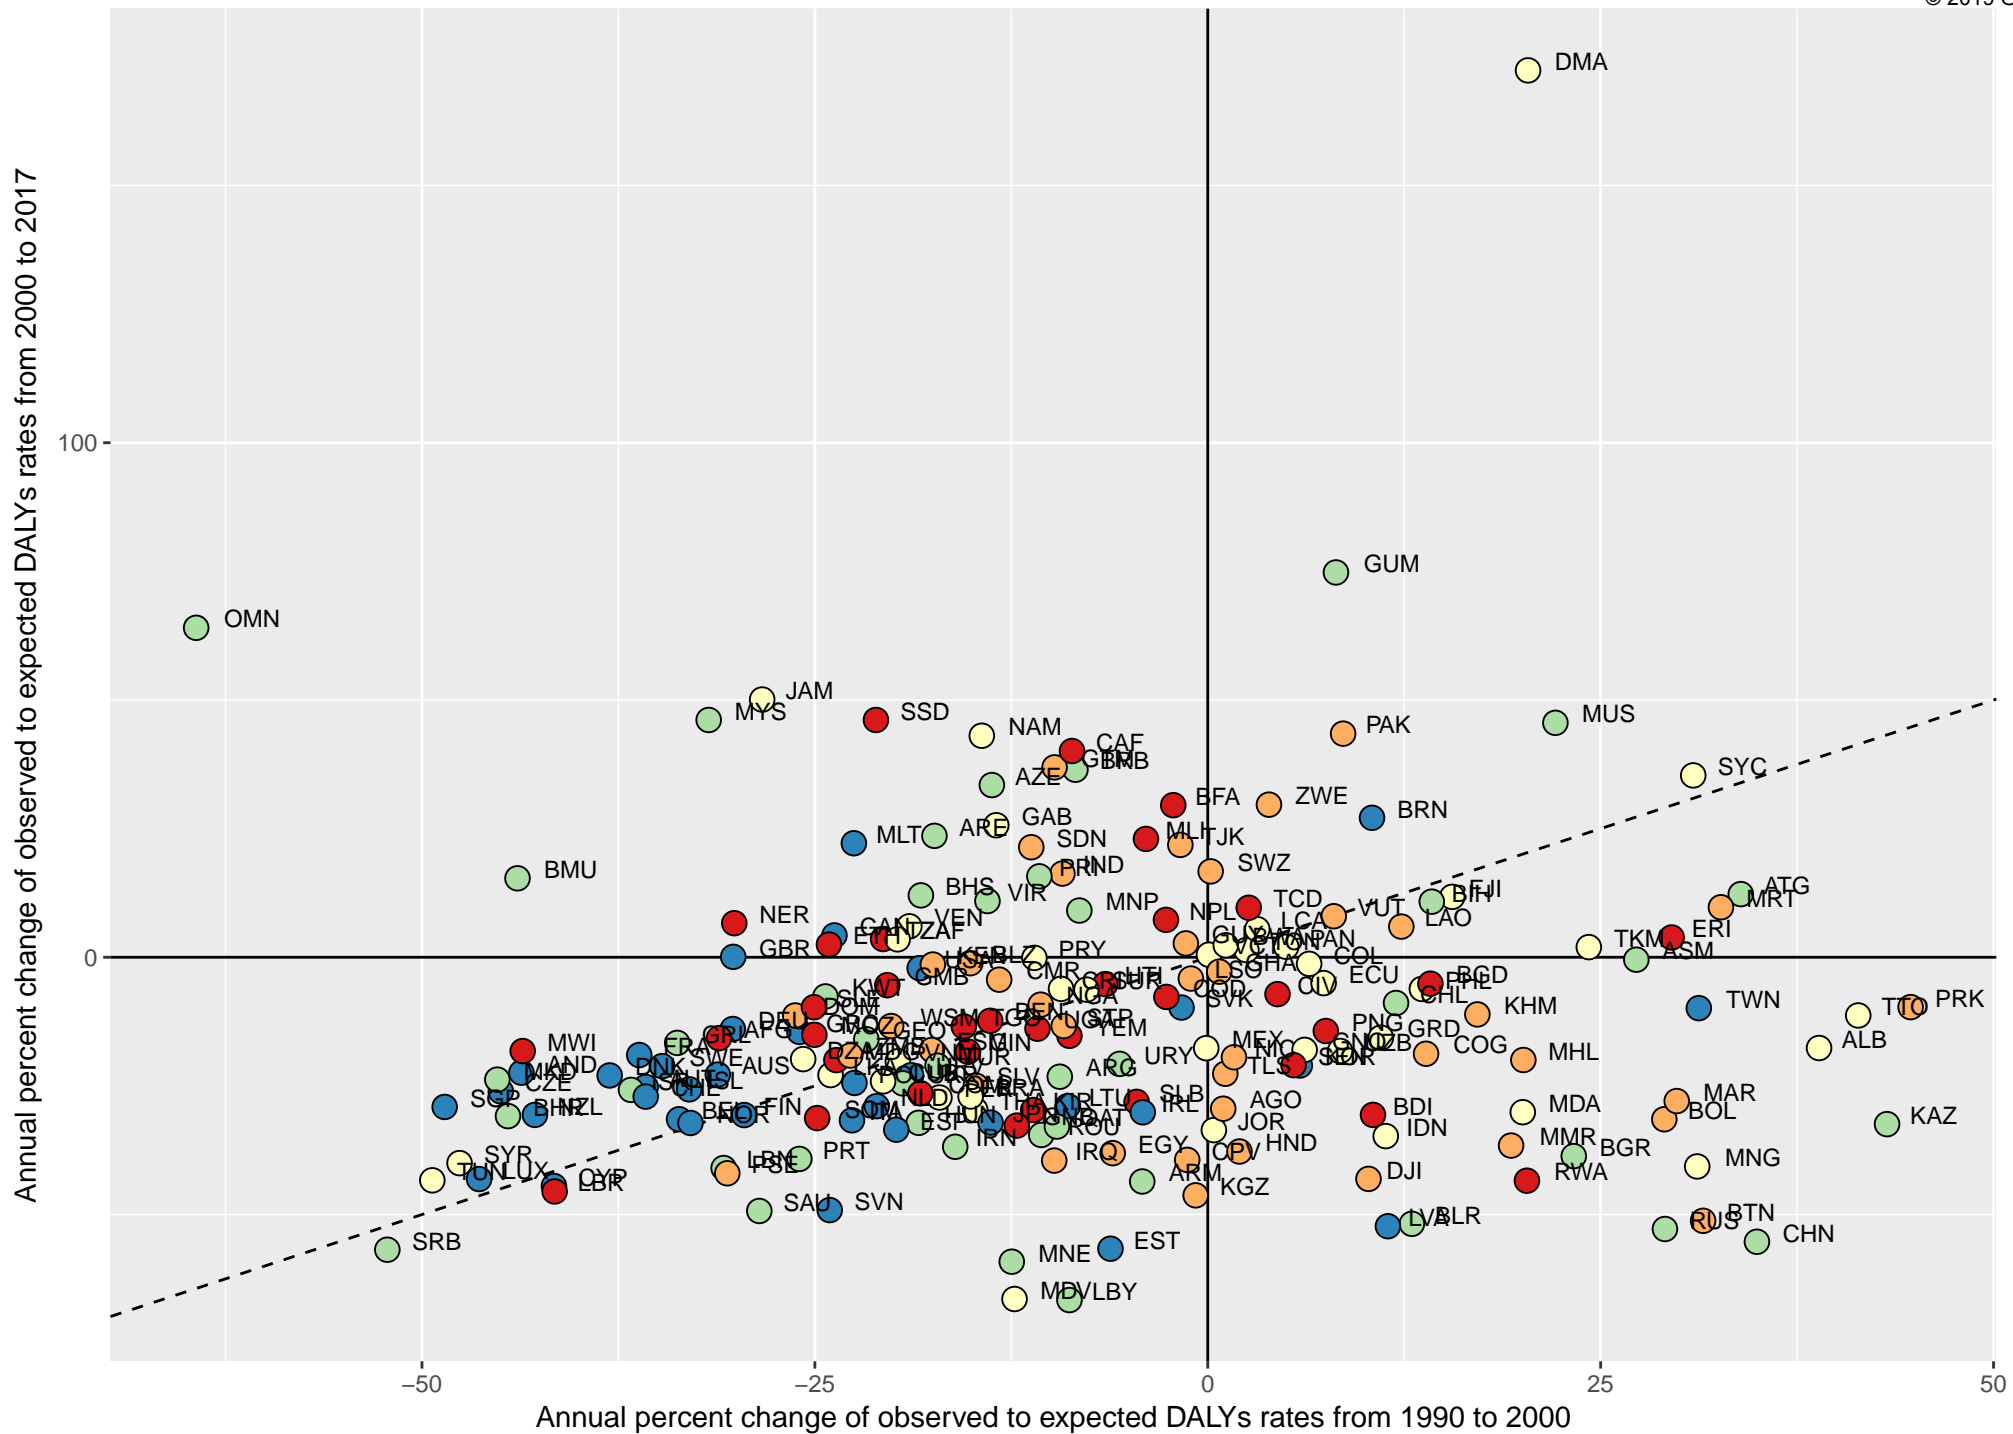

© 2019 GBD 2017 Child and Adolescent Health Collaborators. JAMA Pediatrics.

eFigure 6g. Annual percent change of observed to expected (O:E) all-cause DALY rates in <20 years from 1990 to 2000 versus 2000 to 2017 (graph subsetting to +/- 50%)

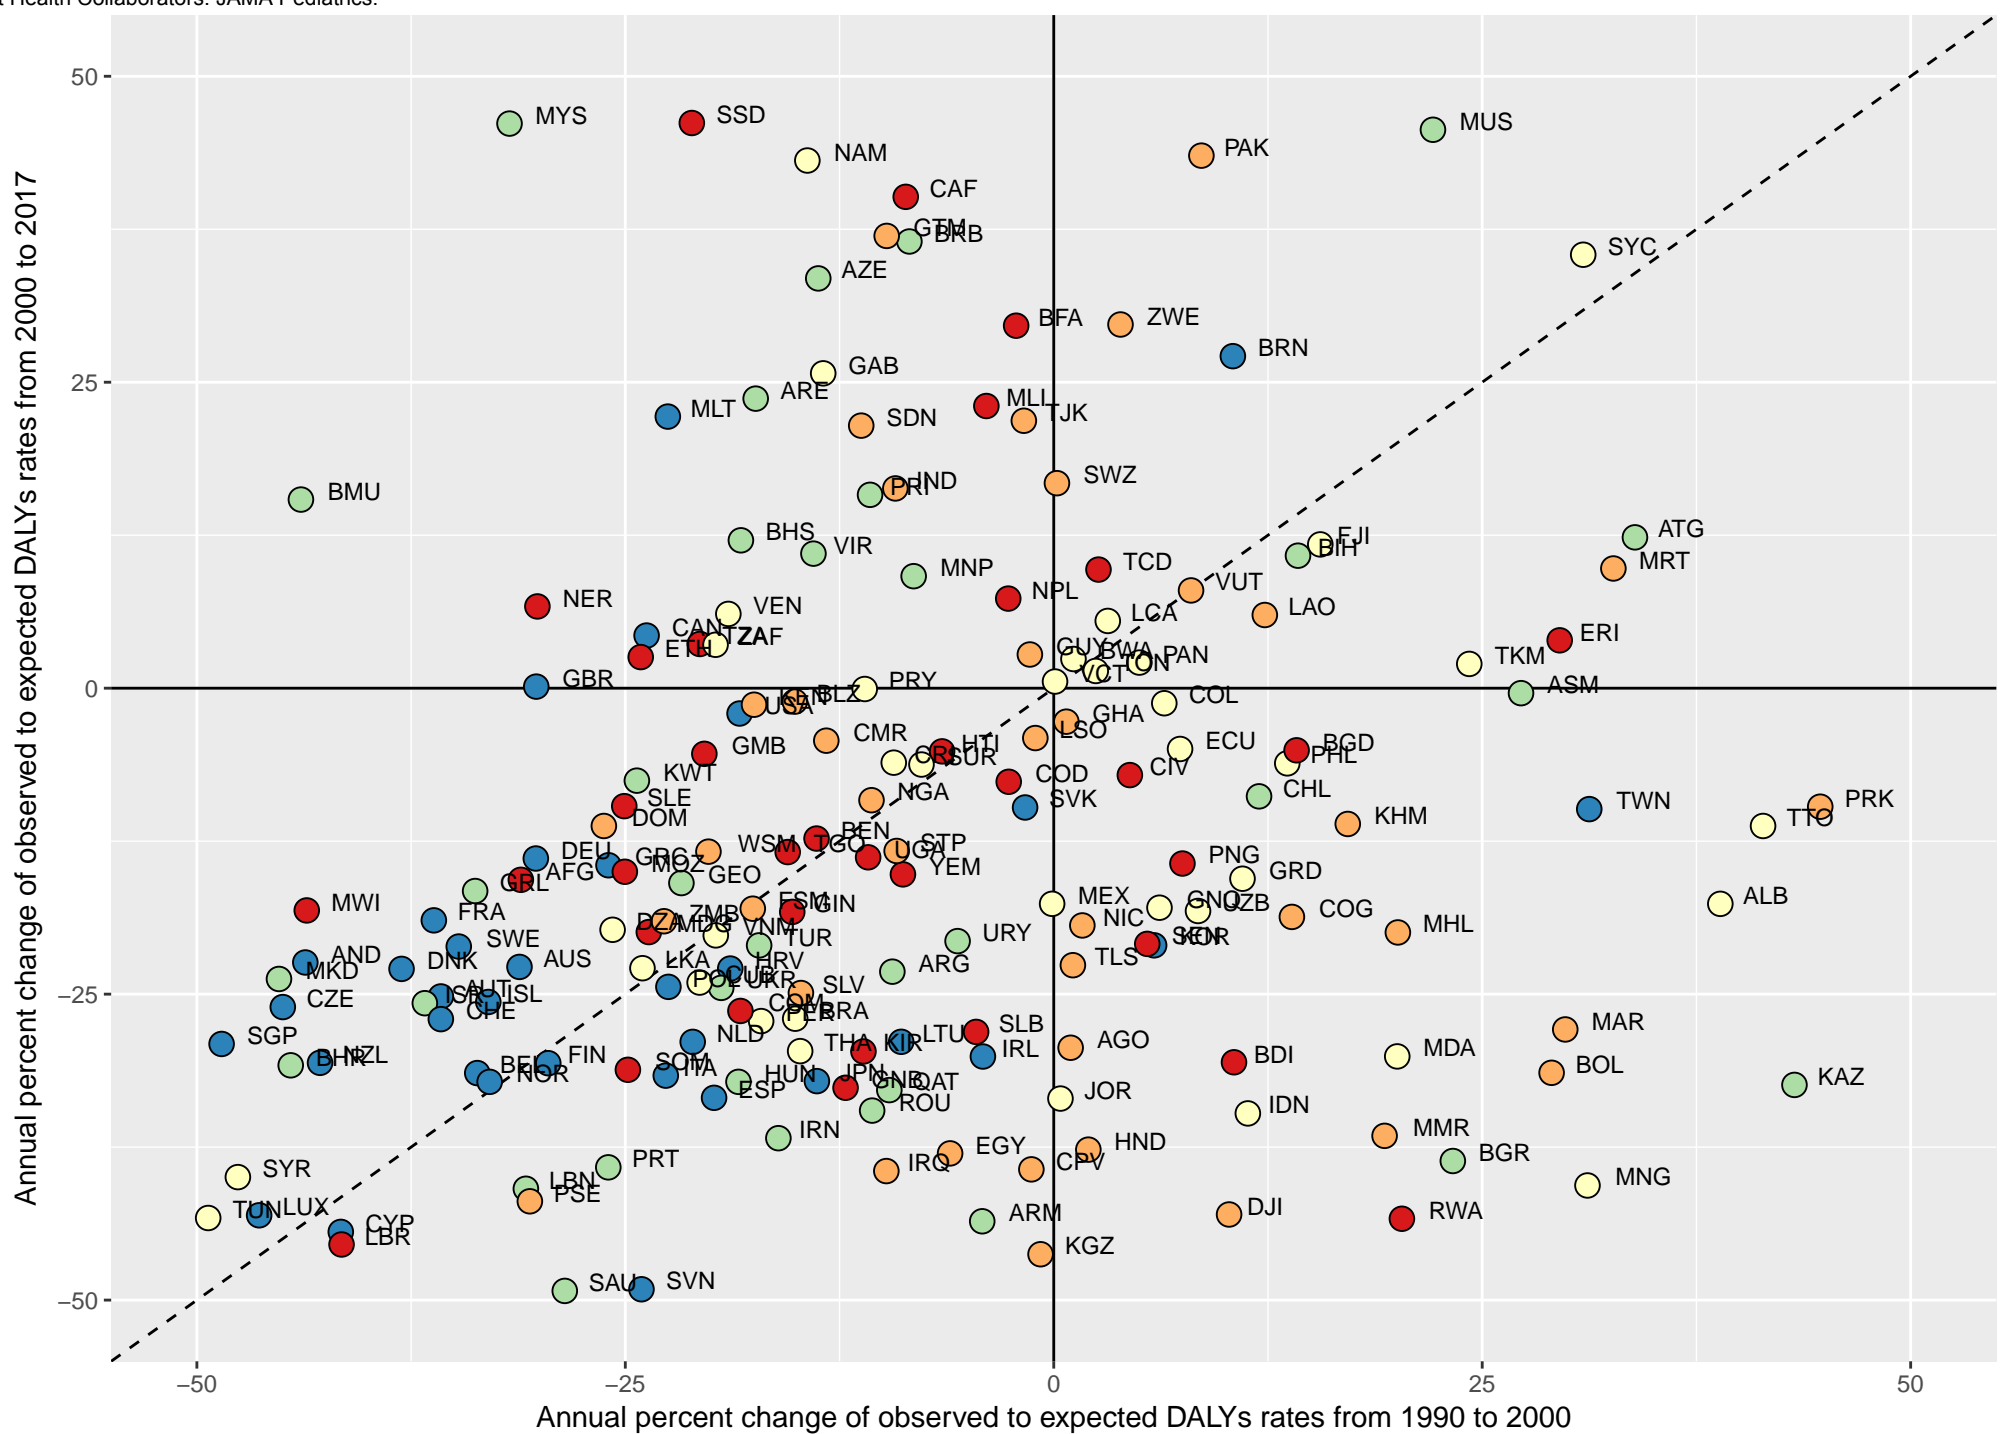

29

Annual percent change of observed versus expected (O:E) disability-adjusted life years (DALYs) rates by country for 1990 to 2000 versus 2000 to 2017 are plotted by country. In each pair of panels, the right panel focuses on changes within +/-50%. Panels a–d plot changes for all children and adolescents less than 20 years of age; panels e–h plot changes for children less than 1; panels i–l plot changes for children between 1 and 4; panels m–p plot changes for children between 5 and 9; and panels q–t plot changes for children between 10 and 19. For each age group, the first plot in the series is the all cause change in O:E rates (i.e., panels a, e, i, m, and q); the second plot in the series is the change in O:E rates associated with communicable, maternal, neonatal, and nutritional (CMNN) conditions (i.e., panels b, f, j, and r); the third plot in the series is the change in O:E rates associated with non-communicable diseases (NCDs – i.e., panels c, g, k, s); and the fourth plot in the series is the change in O:E rates associated with injuries (i.e., panels d, h, l, t). For each, countries in different socio-demographic index (SDI) quintiles are plotted with different countries. Abbreviations: DALY=disability-adjusted life year, AFG – Afghanistan, AGO – Angola, ALB – Albania, AND – Andorra, ARE – United Arab Emirates, ARG – Argentina, ARM – Armenia, ASM – American Samoa, ATG – Antigua and Barbuda, AUS – Australia, AUT – Austria, AZE – Azerbaijan, BDI – Burundi, BEL – Belgium, BEN – Benin, BFA – Burkina Faso, BGD – Bangladesh, BGR – Bulgaria, BHR – Bahrain, BHS – The Bahamas, BIH – Bosnia and Herzegovina, BLR – Belarus, BLZ – Belize, BMU – Bermuda, BOL – Bolivia, BRA – Brazil, BRB – Barbados, BRN – Brunei, BTN – Bhutan, BWA – Botswana, CAF – Central African Republic, CAN – Canada, CHE – Switzerland, CHL – Chile, CHN – China, CIV – Cote d'Ivoire, CMR – Cameroon, COD – Democratic Republic of the Congo, COG – Congo, COL – Colombia, COM – Comoros, CPV – Cape Verde, CRI – Costa Rica, CUB – Cuba, CYP – Cyprus, CZE – Czech Republic, DEU – Germany, DJI – Djibouti, DMA – Dominica, DNK – Denmark, DOM – Dominican Republic, DZA – Algeria, ECU – Ecuador, EGY – Egypt, ERI – Eritrea, ESP – Spain, EST – Estonia, ETH – Ethiopia, FIN – Finland, FJI – Fiji, FRA – France, FSM – Federated States of Micronesia, G – Global, GAB – Gabon, GBR – United Kingdom, GEO – Georgia, GHA – Ghana, GIN – Guinea, GMB – The Gambia, GNB – Guinea-Bissau, GNQ – Equatorial Guinea, GRC – Greece, GRD – Grenada, GRL – Greenland, GTM – Guatemala, GUM – Guam, GUY – Guyana, HND – Honduras, HRV – Croatia, HTI – Haiti, HUN – Hungary, IDN – Indonesia, IND – India, IRL – Ireland, IRN – Iran, IRQ – Iraq, ISL – Iceland, ISR – Israel, ITA – Italy, JAM – Jamaica, JOR – Jordan, JPN – Japan, KAZ – Kazakhstan, KEN – Kenya, KGZ – Kyrgyzstan, KHM – Cambodia, KIR – Kiribati, KOR – South Korea, KWT – Kuwait, LAO – Laos, LBN – Lebanon, LBR – Liberia, LBY – Libya, LCA – Saint Lucia, LKA – Sri Lanka, LSO – Lesotho, LTU – Lithuania, LUX – Luxembourg, LVA – Latvia, MAR – Morocco, MDA – Moldova, MDG – Madagascar, MDV – Maldives, MEX – Mexico, MHL – Marshall Islands, MKD – Macedonia, MLI – Mali, MLT – Malta, MMR – Myanmar, MNE – Montenegro, MNG – Mongolia, MNP – Northern Mariana Islands, MOZ – Mozambique, MRT – Mauritania, MUS – Mauritius, MWI – Malawi, MYS – Malaysia, NAM – Namibia, NER – Niger, NGA – Nigeria, NIC – Nicaragua, NLD – Netherlands, NOR – Norway, NPL – Nepal, NZL – New Zealand, OMN – Oman, PAK – Pakistan, PAN – Panama, PER – Peru, PHL – Philippines, PNG – Papua New Guinea, POL – Poland, PRI – Puerto Rico, PRK – North Korea, PRT – Portugal, PRY – Paraguay, PSE – Palestine, QAT – Qatar, ROU – Romania, RUS – Russian Federation, RWA – Rwanda, SAU – Saudi Arabia, SDN – Sudan, SEN – Senegal, SGP – Singapore, SLB – Solomon Islands, SLE – Sierra Leone, SLV – El Salvador, SOM – Somalia, SRB – Serbia, SSD – South Sudan, STP – Sao Tome and Principe, SUR – Suriname, SVK – Slovakia, SVN – Slovenia, SWE – Sweden, SWZ – Swaziland, SYC – Seychelles, SYR – Syria, TCD – Chad, TGO – Togo, THA – Thailand, TJK – Tajikistan, TKM – Turkmenistan, TLS – Timor-Leste, TON – Tonga, TTO – Trinidad and Tobago, TUN – Tunisia, TUR – Turkey, TWN – Taiwan, TZA – Tanzania, UGA – Uganda, UKR – Ukraine, URY – Uruguay, USA – United States, UZB – Uzbekistan, VCT – Saint Vincent and the Grenadines, VEN – Venezuela, VIR – Virgin Islands, U.S., VNM – Vietnam, VUT – Vanuatu, WSM – Samoa, YEM – Yemen, ZAF – South Africa, ZMB – Zambia, ZWE – Zimbabwe

eFigure 6h. Annual percent change of observed to expected (O:E) all-cause DALY rates in <20 years from 1990 to 2000 versus 2000 to 2017

eFigure 6h. Annual percent change of observed to expected (O:E) all-cause DALY rates in <20 years from 1990 to 2000 versus 2000 to 2017 (graph subsetting to +/- 50%)

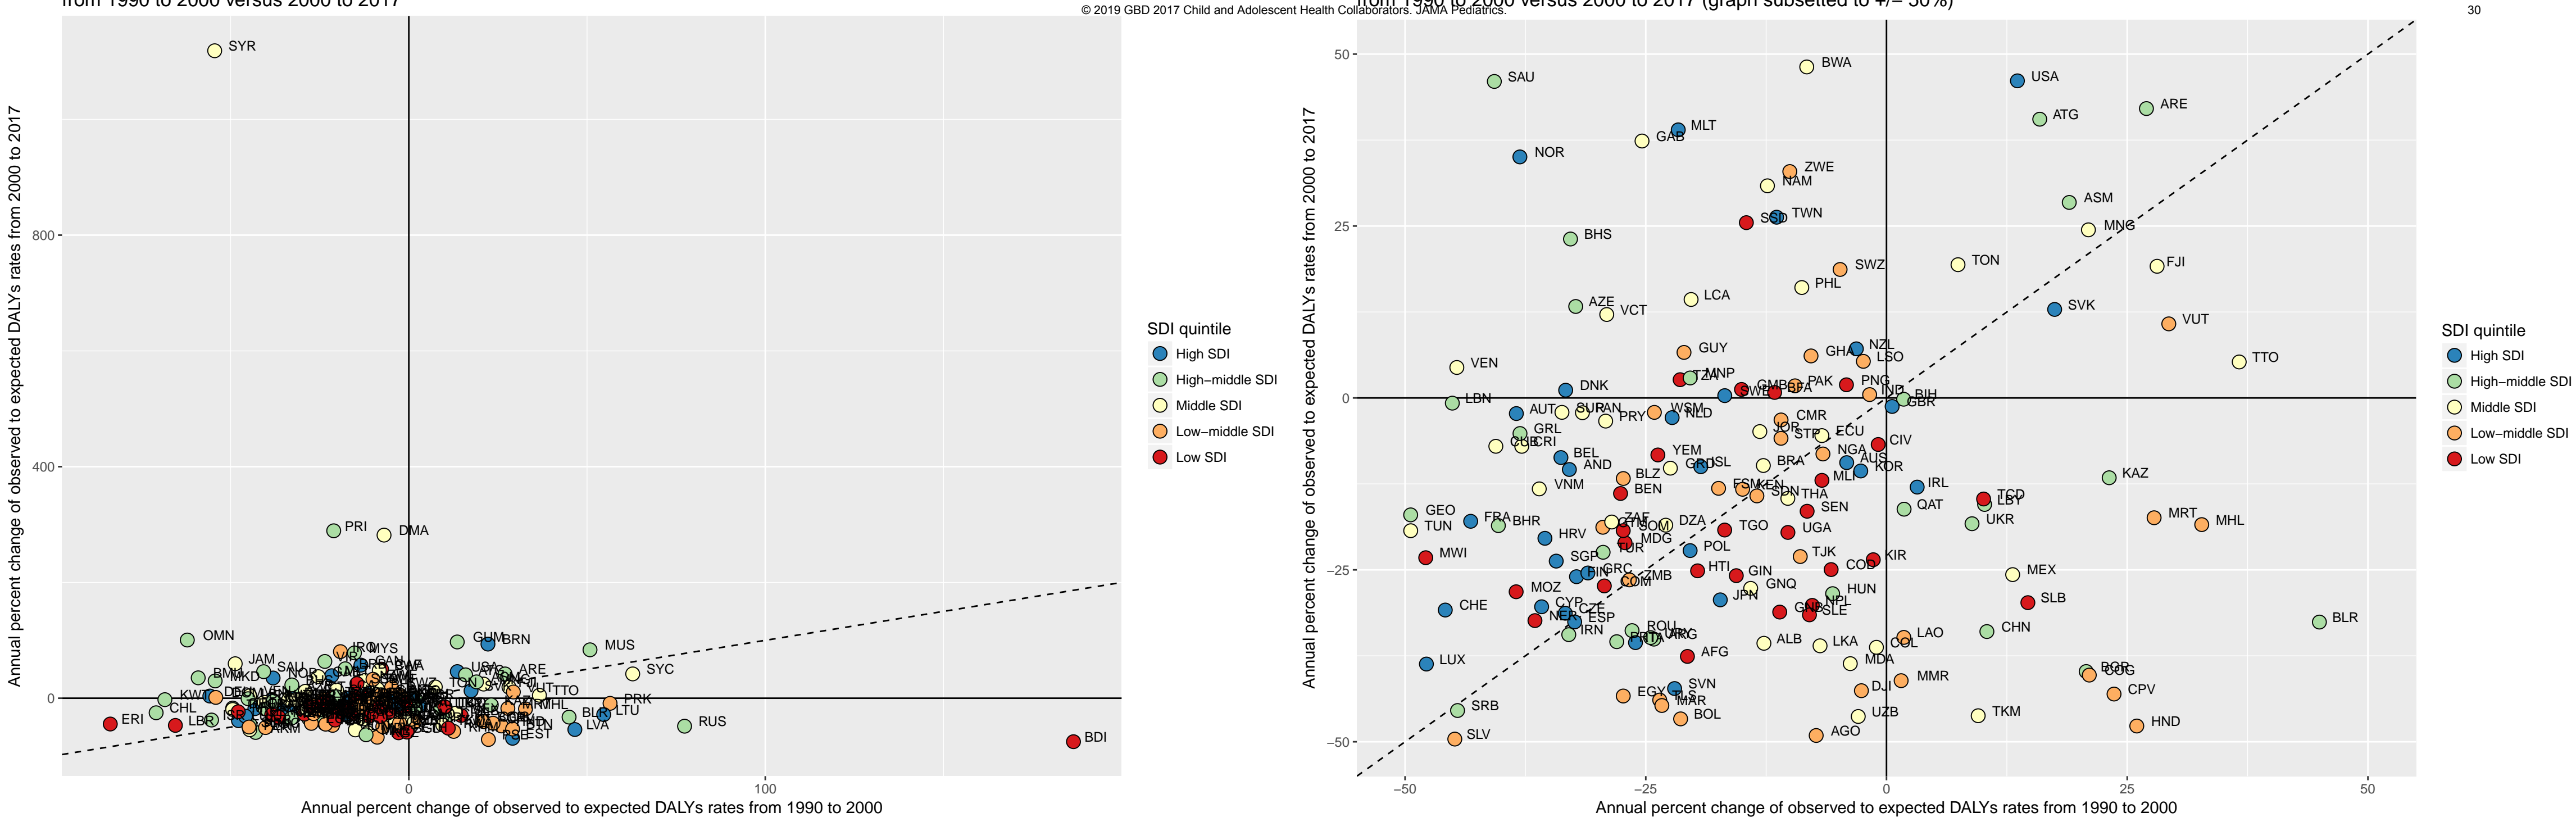

© 2019 GBD 2017 Child and Adolescent Health Collaborators. JAMA Pediatrics.

Annual percent change of observed versus expected (O:E) disability-adjusted life years (DALYs) rates by country for 1990 to 2000 versus 2000 to 2017 are plotted by country. In each pair of panels, the right panel focuses on changes within +/-50%. Panels a–d plot changes for all children and adolescents less than 20 years of age; panels e–h plot changes for children less than 1; panels i–l plot changes for children between 1 and 4; panels m–p plot changes for children between 5 and 9; and panels q–t plot changes for children between 10 and 19. For each age group, the first plot in the series is the all cause change in O:E rates (i.e., panels a, e, i, m, and q); the second plot in the series is the change in O:E rates associated with communicable, maternal, neonatal, and nutritional (CMNN) conditions (i.e., panels b, f, j, and r); the third plot in the series is the change in O:E rates associated with non-communicable diseases (NCDs – i.e., panels c, g, k, s); and the fourth plot in the series is the change in O:E rates associated with injuries (i.e., panels d, h, l, t). For each, countries in different socio-demographic index (SDI) quintiles are plotted with different countries. Abbreviations: DALY=disability-adjusted life year, AFG – Afghanistan, AGO – Angola, ALB – Albania, AND – Andorra, ARE – United Arab Emirates, ARG – Argentina, ARM – Armenia, ASM – American Samoa, ATG – Antigua and Barbuda, AUS – Australia, AUT – Austria, AZE – Azerbaijan, BDI – Burundi, BEL – Belgium, BEN – Benin, BFA – Burkina Faso, BGD – Bangladesh, BGR – Bulgaria, BHR – Bahrain, BHS – The Bahamas, BIH – Bosnia and Herzegovina, BLR – Belarus, BLZ – Belize, BMU – Bermuda, BOL – Bolivia, BRA – Brazil, BRB – Barbados, BRN – Brunei, BTN – Bhutan, BWA – Botswana, CAF – Central African Republic, CAN – Canada, CHE – Switzerland, CHL – Chile, CHN – China, CIV – Cote d'Ivoire, CMR – Cameroon, COD – Democratic Republic of the Congo, COG – Congo, COL – Colombia, COM – Comoros, CPV – Cape Verde, CRI – Costa Rica, CUB – Cuba, CYP – Cyprus, CZE – Czech Republic, DEU – Germany, DJI – Djibouti, DMA – Dominica, DNK – Denmark, DOM – Dominican Republic, DZA – Algeria, ECU – Ecuador, EGY – Egypt, ERI – Eritrea, ESP – Spain, EST – Estonia, ETH – Ethiopia, FIN – Finland, FJI – Fiji, FRA – France, FSM – Federated States of Micronesia, G – Global, GAB – Gabon, GBR – United Kingdom, GEO – Georgia, GHA – Ghana, GIN – Guinea, GMB – The Gambia, GNB – Guinea-Bissau, GNQ – Equatorial Guinea, GRC – Greece, GRD – Grenada, GRL – Greenland, GTM – Guatemala, GUM – Guam, GUY – Guyana, HND – Honduras, HRV – Croatia, HTI – Haiti, HUN – Hungary, IDN – Indonesia, IND – India, IRL – Ireland, IRN – Iran, IRQ – Iraq, ISL – Iceland, ISR – Israel, ITA – Italy, JAM – Jamaica, JOR – Jordan, JPN – Japan, KAZ – Kazakhstan, KEN – Kenya, KGZ – Kyrgyzstan, KHM – Cambodia, KIR – Kiribati, KOR – South Korea, KWT – Kuwait, LAO – Laos, LBN – Lebanon, LBR – Liberia, LBY – Libya, LCA – Saint Lucia, LKA – Sri Lanka, LSO – Lesotho, LTU – Lithuania, LUX – Luxembourg, LVA – Latvia, MAR – Morocco, MDA – Moldova, MDG – Madagascar, MDV – Maldives, MEX – Mexico, MHL – Marshall Islands, MKD – Macedonia, MLI – Mali, MLT – Malta, MMR – Myanmar, MNE – Montenegro, MNG – Mongolia, MNP – Northern Mariana Islands, MOZ – Mozambique, MRT – Mauritania, MUS – Mauritius, MWI – Malawi, MYS – Malaysia, NAM – Namibia, NER – Niger, NGA – Nigeria, NIC – Nicaragua, NLD – Netherlands, NOR – Norway, NPL – Nepal, NZL – New Zealand, OMN – Oman, PAK – Pakistan, PAN – Panama, PER – Peru, PHL – Philippines, PNG – Papua New Guinea, POL – Poland, PRI – Puerto Rico, PRK – North Korea, PRT – Portugal, PRY – Paraguay, PSE – Palestine, QAT – Qatar, ROU – Romania, RUS – Russian Federation, RWA – Rwanda, SAU – Saudi Arabia, SDN – Sudan, SEN – Senegal, SGP – Singapore, SLB – Solomon Islands, SLE – Sierra Leone, SLV – El Salvador, SOM – Somalia, SRB – Serbia, SSD – South Sudan, STP – Sao Tome and Principe, SUR – Suriname, SVK – Slovakia, SVN – Slovenia, SWE – Sweden, SWZ – Swaziland, SYC – Seychelles, SYR – Syria, TCD – Chad, TGO – Togo, THA – Thailand, TJK – Tajikistan, TKM – Turkmenistan, TLS – Timor-Leste, TON – Tonga, TTO – Trinidad and Tobago, TUN – Tunisia, TUR – Turkey, TWN – Taiwan, TZA – Tanzania, UGA – Uganda, UKR – Ukraine, URY – Uruguay, USA – United States, UZB – Uzbekistan, VCT – Saint Vincent and the Grenadines, VEN – Venezuela, VIR – Virgin Islands, U.S., VNM – Vietnam, VUT – Vanuatu, WSM – Samoa, YEM – Yemen, ZAF – South Africa, ZMB – Zambia, ZWE – Zimbabwe

eFigure 6i. Annual percent change of observed to expected (O:E) all-cause DALY rates in <20 years from 1990 to 2000 versus 2000 to 2017 (graph subsetted to +/- 50%)

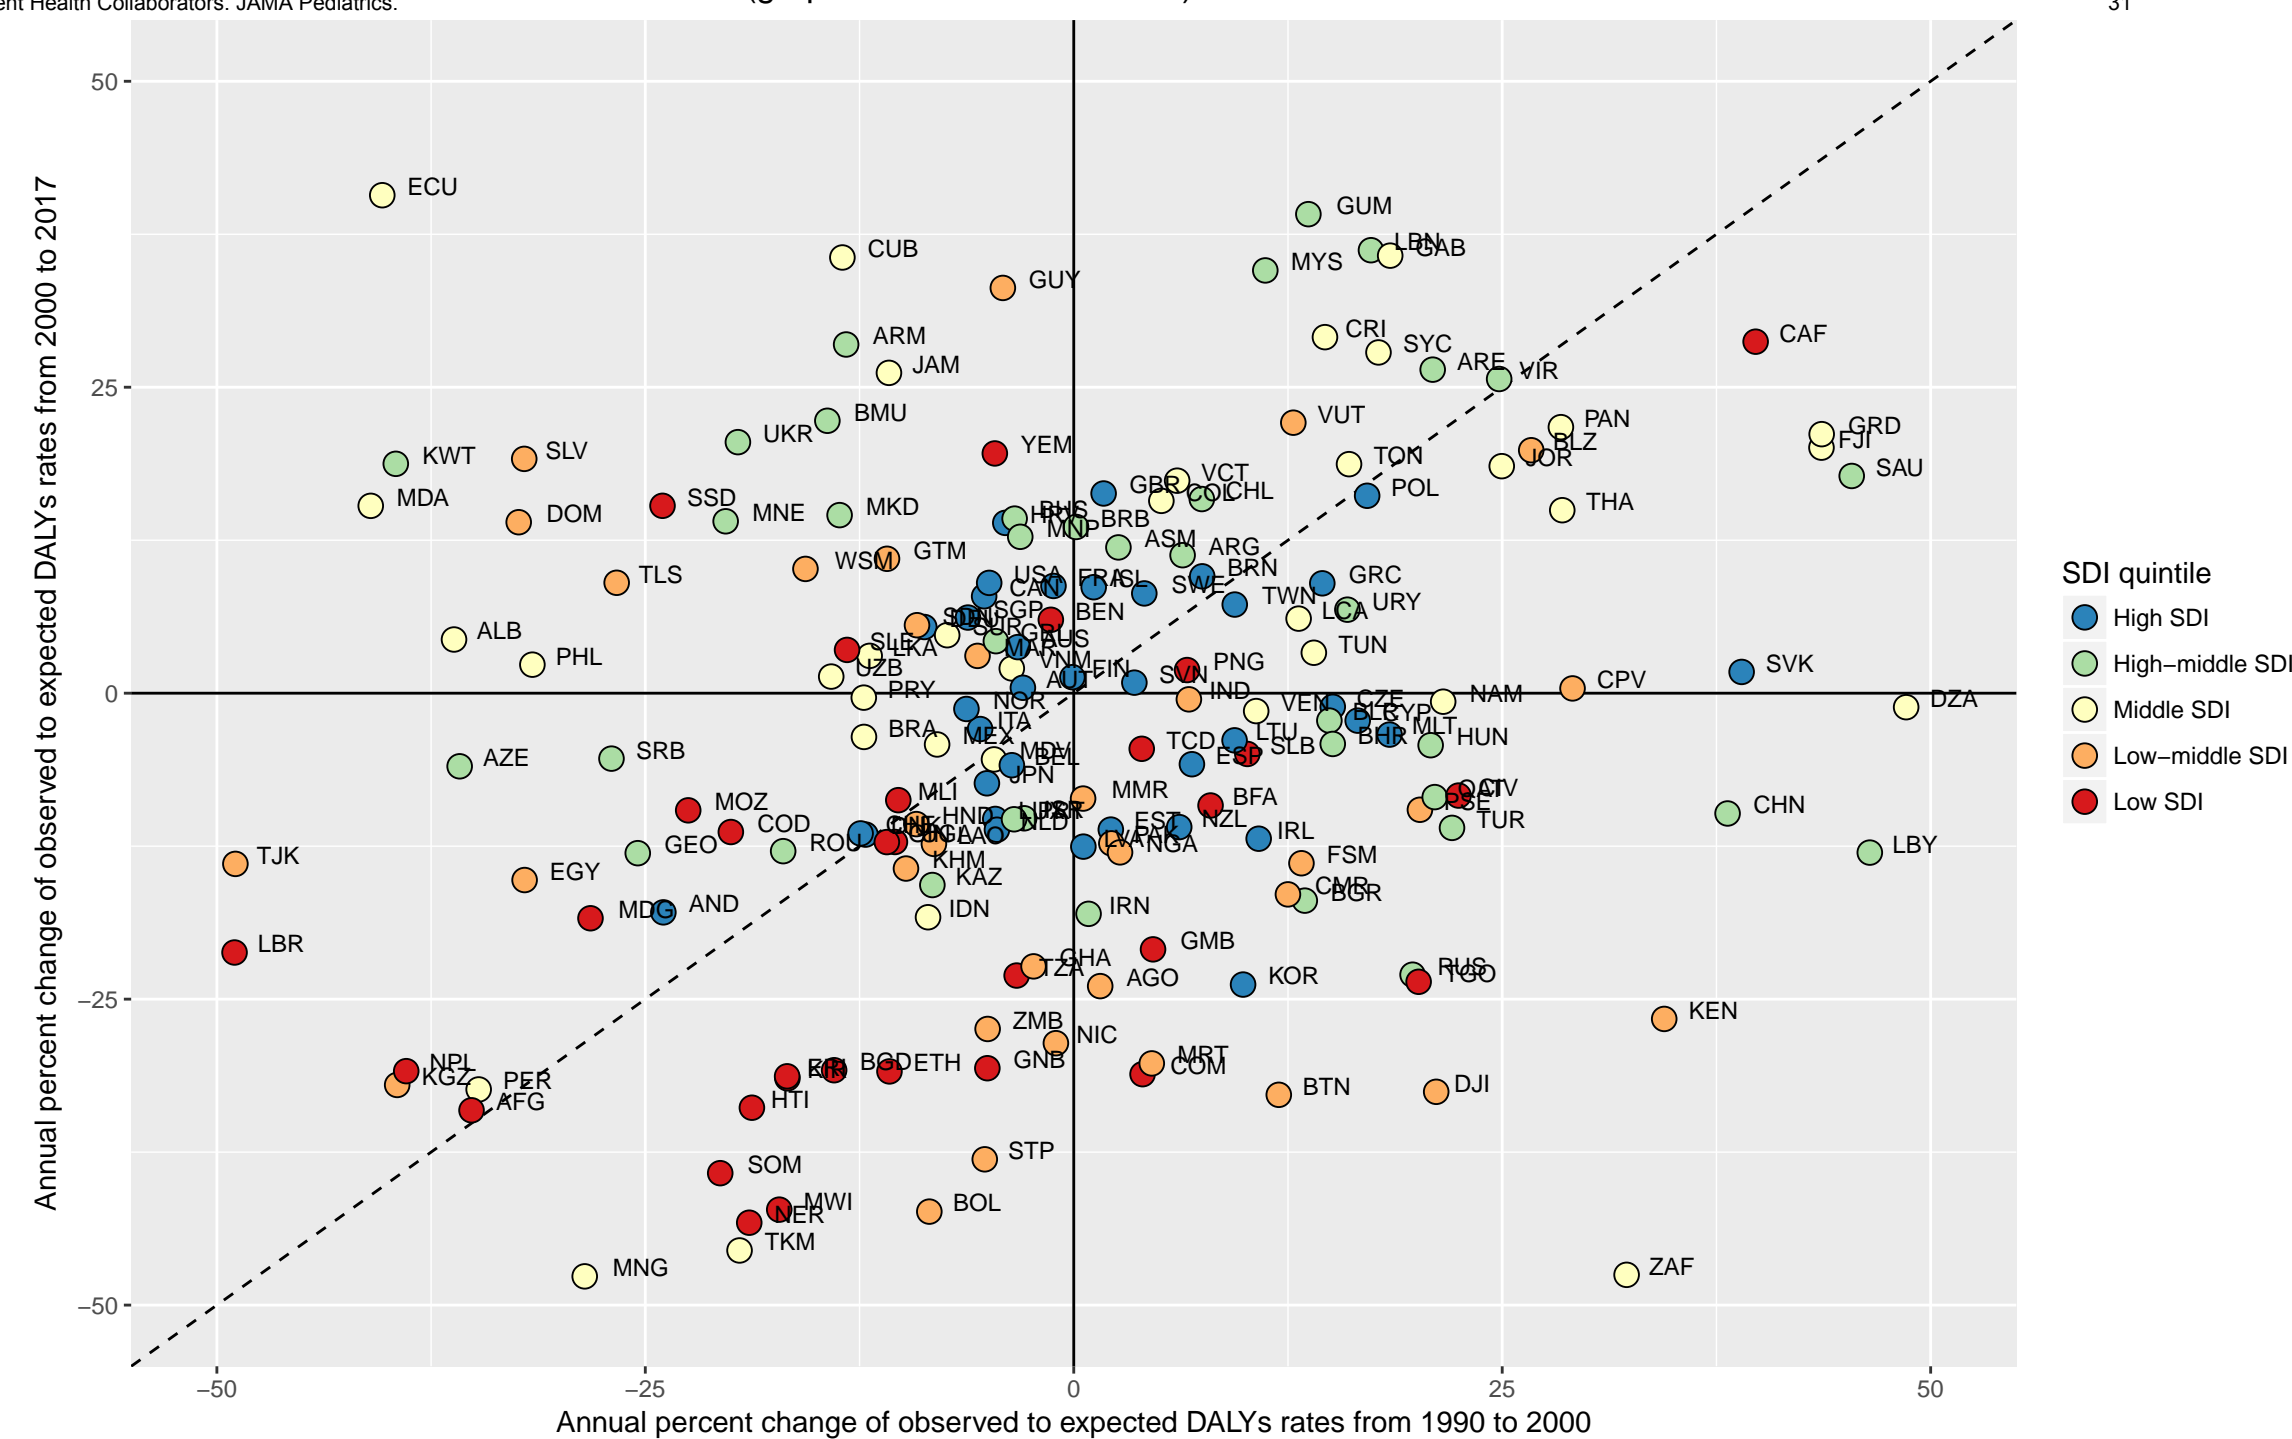

31

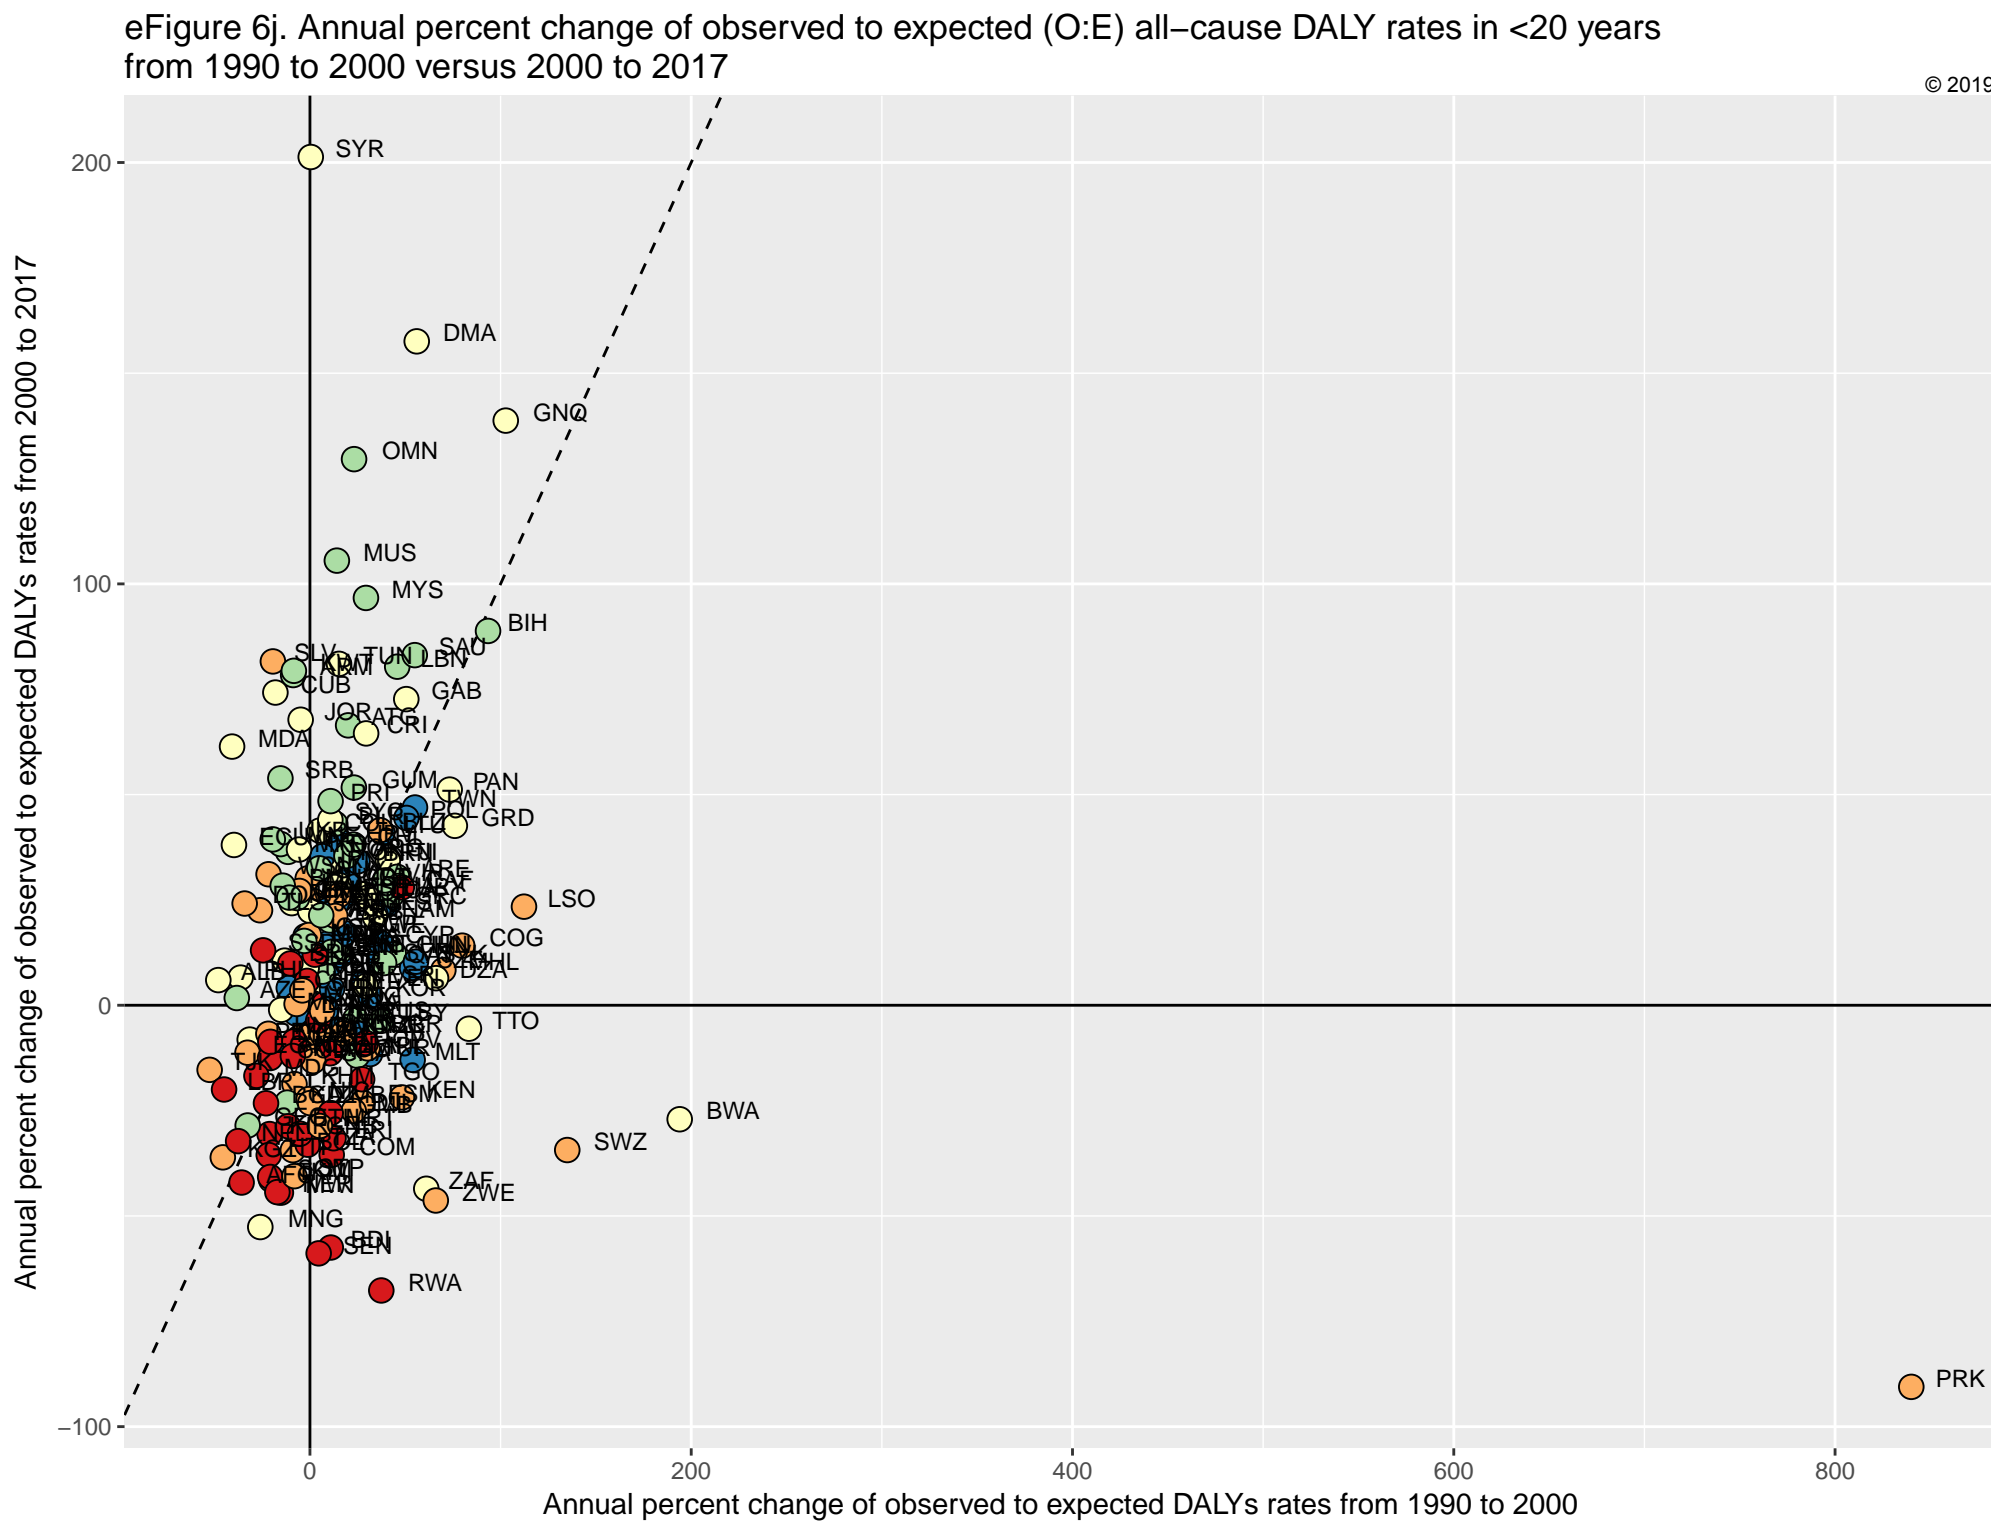

© 2019 GBD 2017 Child and Adolescent Health Collaborators. JAMA Pediatrics.

SDI quintile

- High SDI
- High-middle SDI
- Middle SDI
- Low-middle SDI
- Low SDI

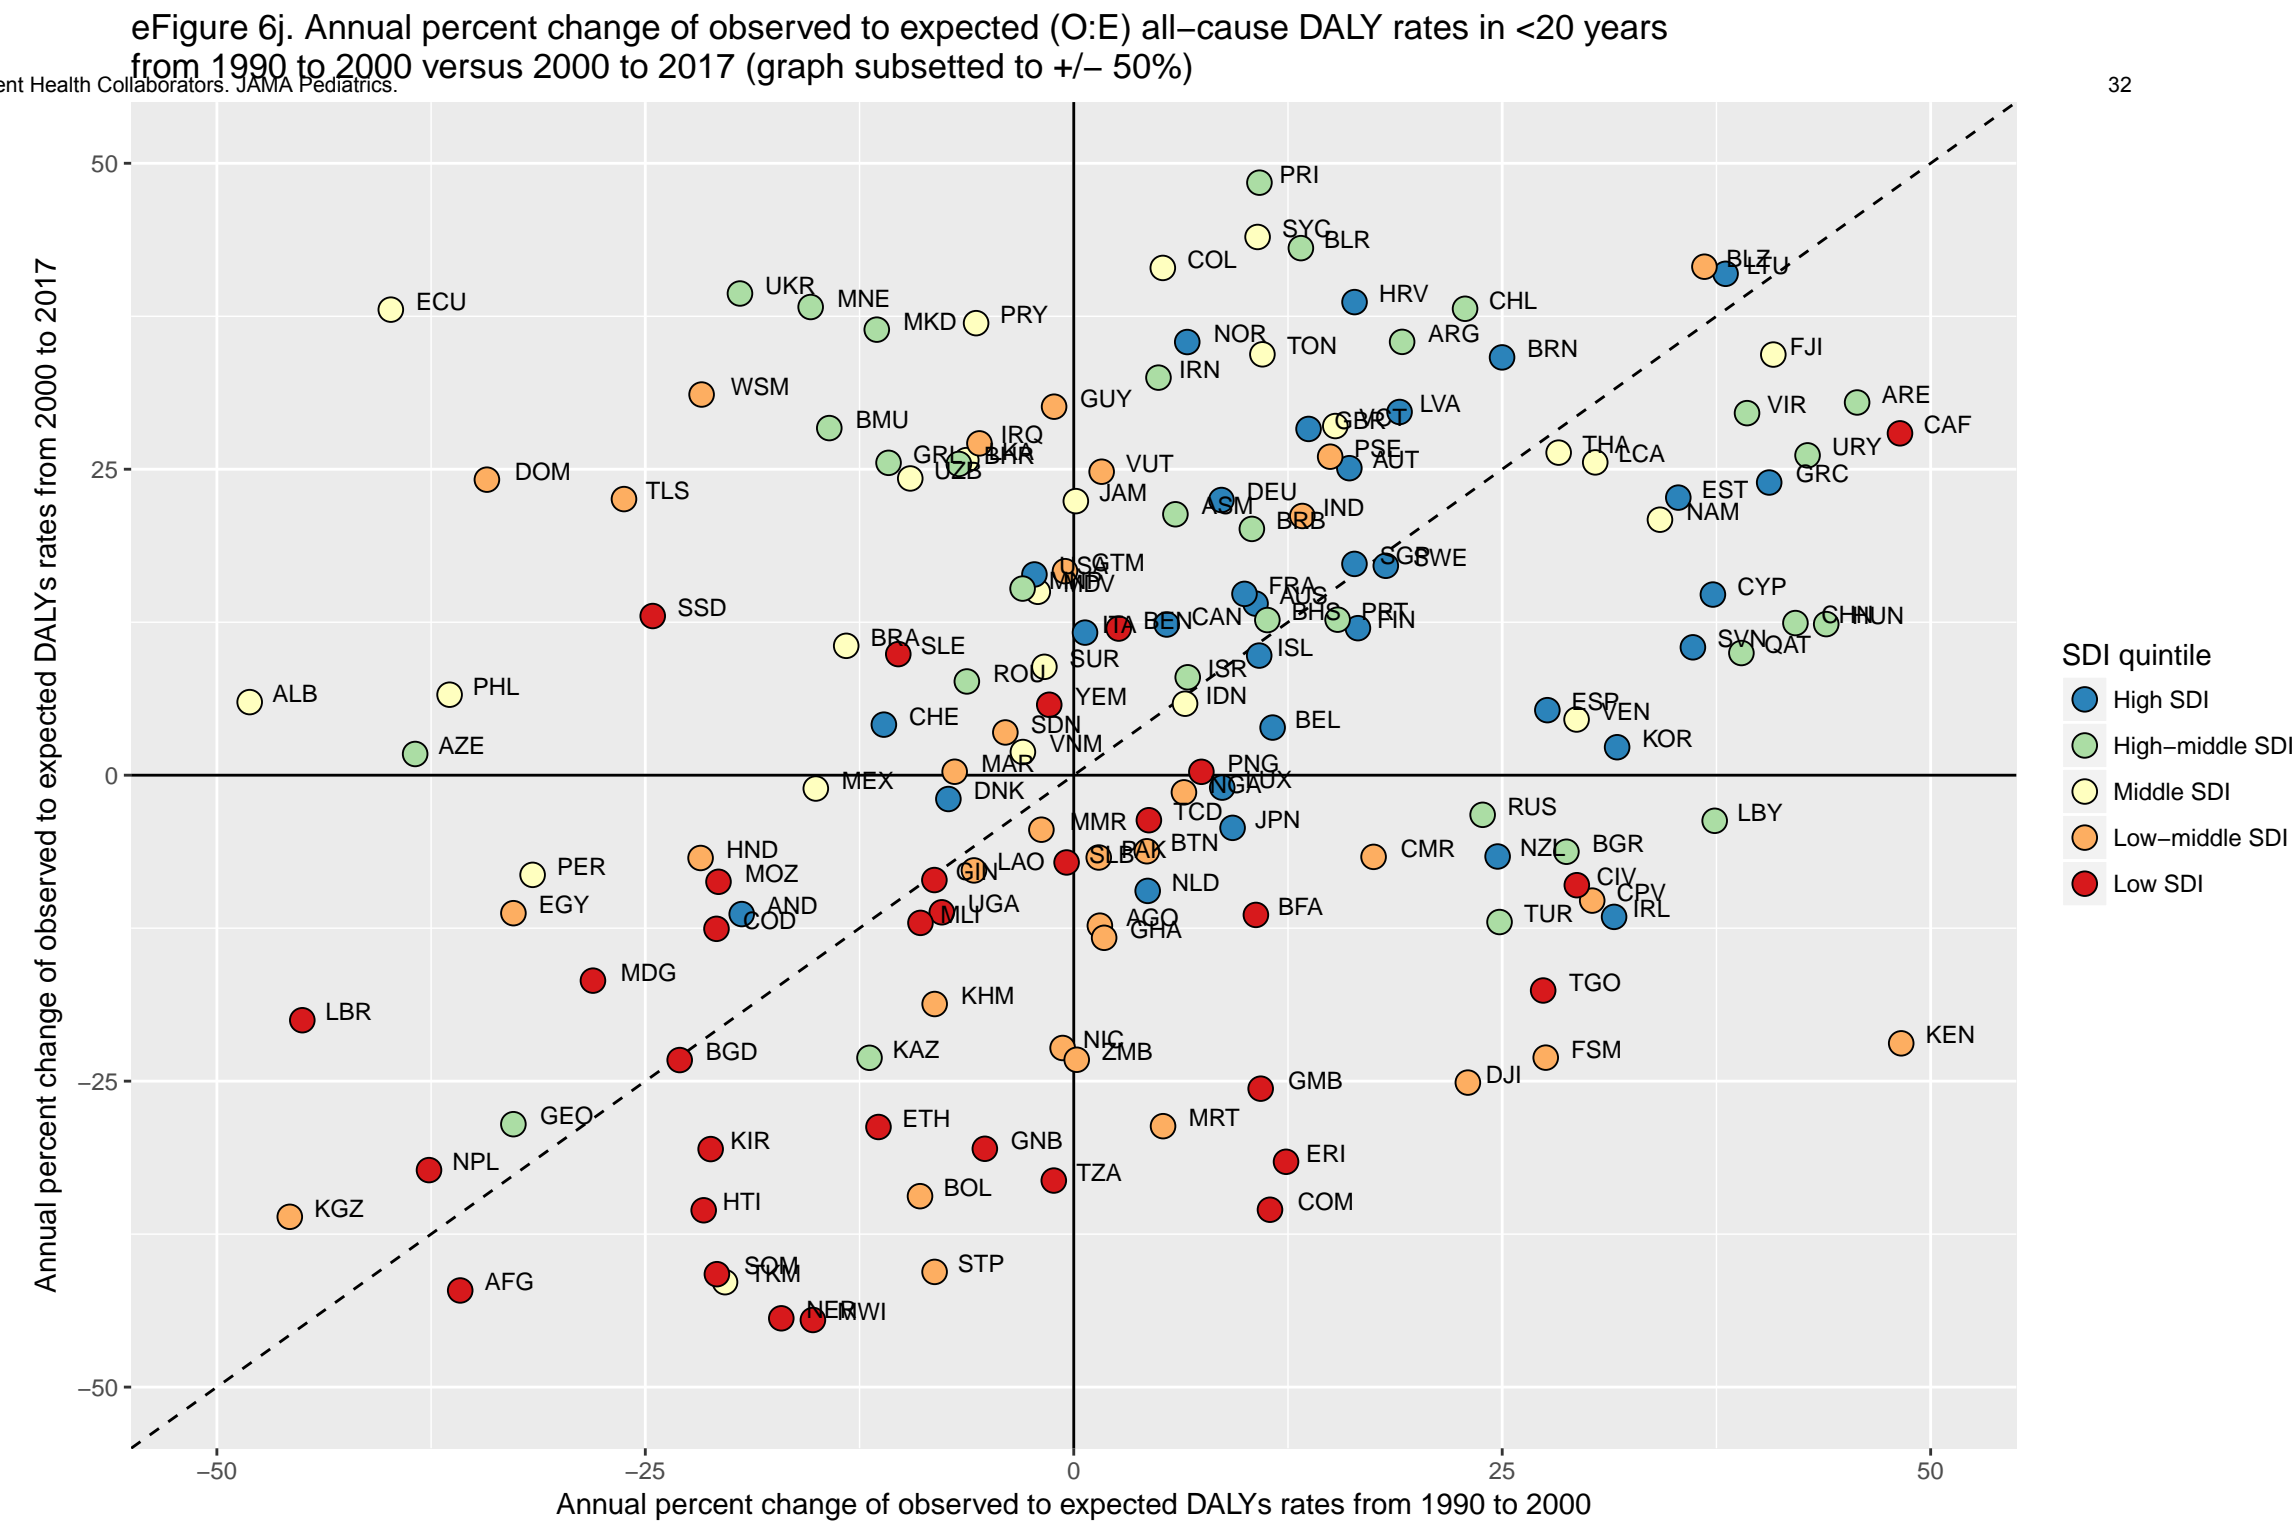

32

Annual percent change of observed versus expected (O:E) disability-adjusted life years (DALYs) rates by country for 1990 to 2000 versus 2000 to 2017 are plotted by country. In each pair of panels, the right panel focuses on changes within  $\pm 50\%$ . Panels a–d plot changes for all children and adolescents less than 20 years of age; panels e–h plot changes for children less than 1; panels i–l plot changes for children between 1 and 4; panels m–p plot changes for children between 5 and 9; and panels q–t plot changes for children between 10 and 19. For each age group, the first plot in the series is the all cause change in O:E rates (i.e., panels a, e, i, m, and q); the second plot in the series is the change in O:E rates associated with communicable, maternal, neonatal, and nutritional (CMNN) conditions (i.e., panels b, f, j, and r); the third plot in the series is the change in O:E rates associated with non-communicable diseases (NCDs – i.e., panels c, g, k, s); and the fourth plot in the series is the change in O:E rates associated with injuries (i.e., panels d, h, l, t). For each, countries in different socio-demographic index (SDI) quintiles are plotted with different countries. Abbreviations: DALY=disability-adjusted life year, AFG – Afghanistan, AGO – Angola, ALB – Albania, AND – Andorra, ARE – United Arab Emirates, ARG – Argentina, ARM – Armenia, ASM – American Samoa, ATG – Antigua and Barbuda, AUS – Australia, AUT – Austria, AZE – Azerbaijan, BDI – Burundi, BEL – Belgium, BEN – Benin, BFA – Burkina Faso, BGD – Bangladesh, BGR – Bulgaria, BHR – Bahrain, BHS – The Bahamas, BIH – Bosnia and Herzegovina, BLR – Belarus, BLZ – Belize, BMU – Bermuda, BOL – Bolivia, BRA – Brazil, BRB – Barbados, BRN – Brunei, BTN – Bhutan, BWA – Botswana, CAF – Central African Republic, CAN – Canada, CHE – Switzerland, CHL – Chile, CHN – China, CIV – Cote d'Ivoire, CMR – Cameroon, COD – Democratic Republic of the Congo, COG – Congo, COL – Colombia, COM – Comoros, CPV – Cape Verde, CRI – Costa Rica, CUB – Cuba, CYP – Cyprus, CZE – Czech Republic, DEU – Germany, DJI – Djibouti, DMA – Dominica, DNK – Denmark, DOM – Dominican Republic, DZA – Algeria, ECU – Ecuador, EGY – Egypt, ERI – Eritrea, ESP – Spain, EST – Estonia, ETH – Ethiopia, FIN – Finland, FJI – Fiji, FRA – France, FSM – Federated States of Micronesia, G – Global, GAB – Gabon, GBR – United Kingdom, GEO – Georgia, GHA – Ghana, GIN – Guinea, GMB – The Gambia, GNB – Guinea-Bissau, GNQ – Equatorial Guinea, GRC – Greece, GRD – Grenada, GRL – Greenland, GTM – Guatemala, GUM – Guam, GUY – Guyana, HND – Honduras, HRV – Croatia, HTI – Haiti, HUN – Hungary, IDN – Indonesia, IND – India, IRL – Ireland, IRN – Iran, IRQ – Iraq, ISL – Iceland, ISR – Israel, ITA – Italy, JAM – Jamaica, JOR – Jordan, JPN – Japan, KAZ – Kazakhstan, KEN – Kenya, KGZ – Kyrgyzstan, KHM – Cambodia, KIR – Kiribati, KOR – South Korea, KWT – Kuwait, LAO – Laos, LBN – Lebanon, LBR – Liberia, LBY – Libya, LCA – Saint Lucia, LKA – Sri Lanka, LSO – Lesotho, LTU – Lithuania, LUX – Luxembourg, LVA – Latvia, MAR – Morocco, MDA – Moldova, MDG – Madagascar, MDV – Maldives, MEX – Mexico, MHL – Marshall Islands, MKD – Macedonia, MLI – Mali, MLT – Malta, MMR – Myanmar, MNE – Montenegro, MNG – Mongolia, MNP – Northern Mariana Islands, MOZ – Mozambique, MRT – Mauritania, MUS – Mauritius, MWI – Malawi, MYS – Malaysia, NAM – Namibia, NER – Niger, NGA – Nigeria, NIC – Nicaragua, NLD – Netherlands, NOR – Norway, NPL – Nepal, NZL – New Zealand, OMN – Oman, PAK – Pakistan, PAN – Panama, PER – Peru, PHL – Philippines, PNG – Papua New Guinea, POL – Poland, PRI – Puerto Rico, PRK – North Korea, PRT – Portugal, PRY – Paraguay, PSE – Palestine, QAT – Qatar, ROU – Romania, RUS – Russian Federation, RWA – Rwanda, SAU – Saudi Arabia, SDN – Sudan, SEN – Senegal, SGP – Singapore, SLB – Solomon Islands, SLE – Sierra Leone, SLV – El Salvador, SOM – Somalia, SRB – Serbia, SSD – South Sudan, STP – Sao Tome and Principe, SUR – Suriname, SVK – Slovakia, SVN – Slovenia, SWE – Sweden, SWZ – Swaziland, SYC – Seychelles, SYR – Syria, TCD – Chad, TGO – Togo, THA – Thailand, TJK – Tajikistan, TKM – Turkmenistan, TLS – Timor-Leste, TON – Tonga, TTO – Trinidad and Tobago, TUN – Tunisia, TUR – Turkey, TWN – Taiwan, TZA – Tanzania, UGA – Uganda, UKR – Ukraine, URY – Uruguay, USA – United States, UZB – Uzbekistan, VCT – Saint Vincent and the Grenadines, VEN – Venezuela, VIR – Virgin Islands, U.S., VNM – Vietnam, VUT – Vanuatu, WSM – Samoa, YEM – Yemen, ZAF – South Africa, ZMB – Zambia, ZWE – Zimbabwe

eFigure 6k. Annual percent change of observed to expected (O:E) all-cause DALY rates in <20 years from 1990 to 2000 versus 2000 to 2017

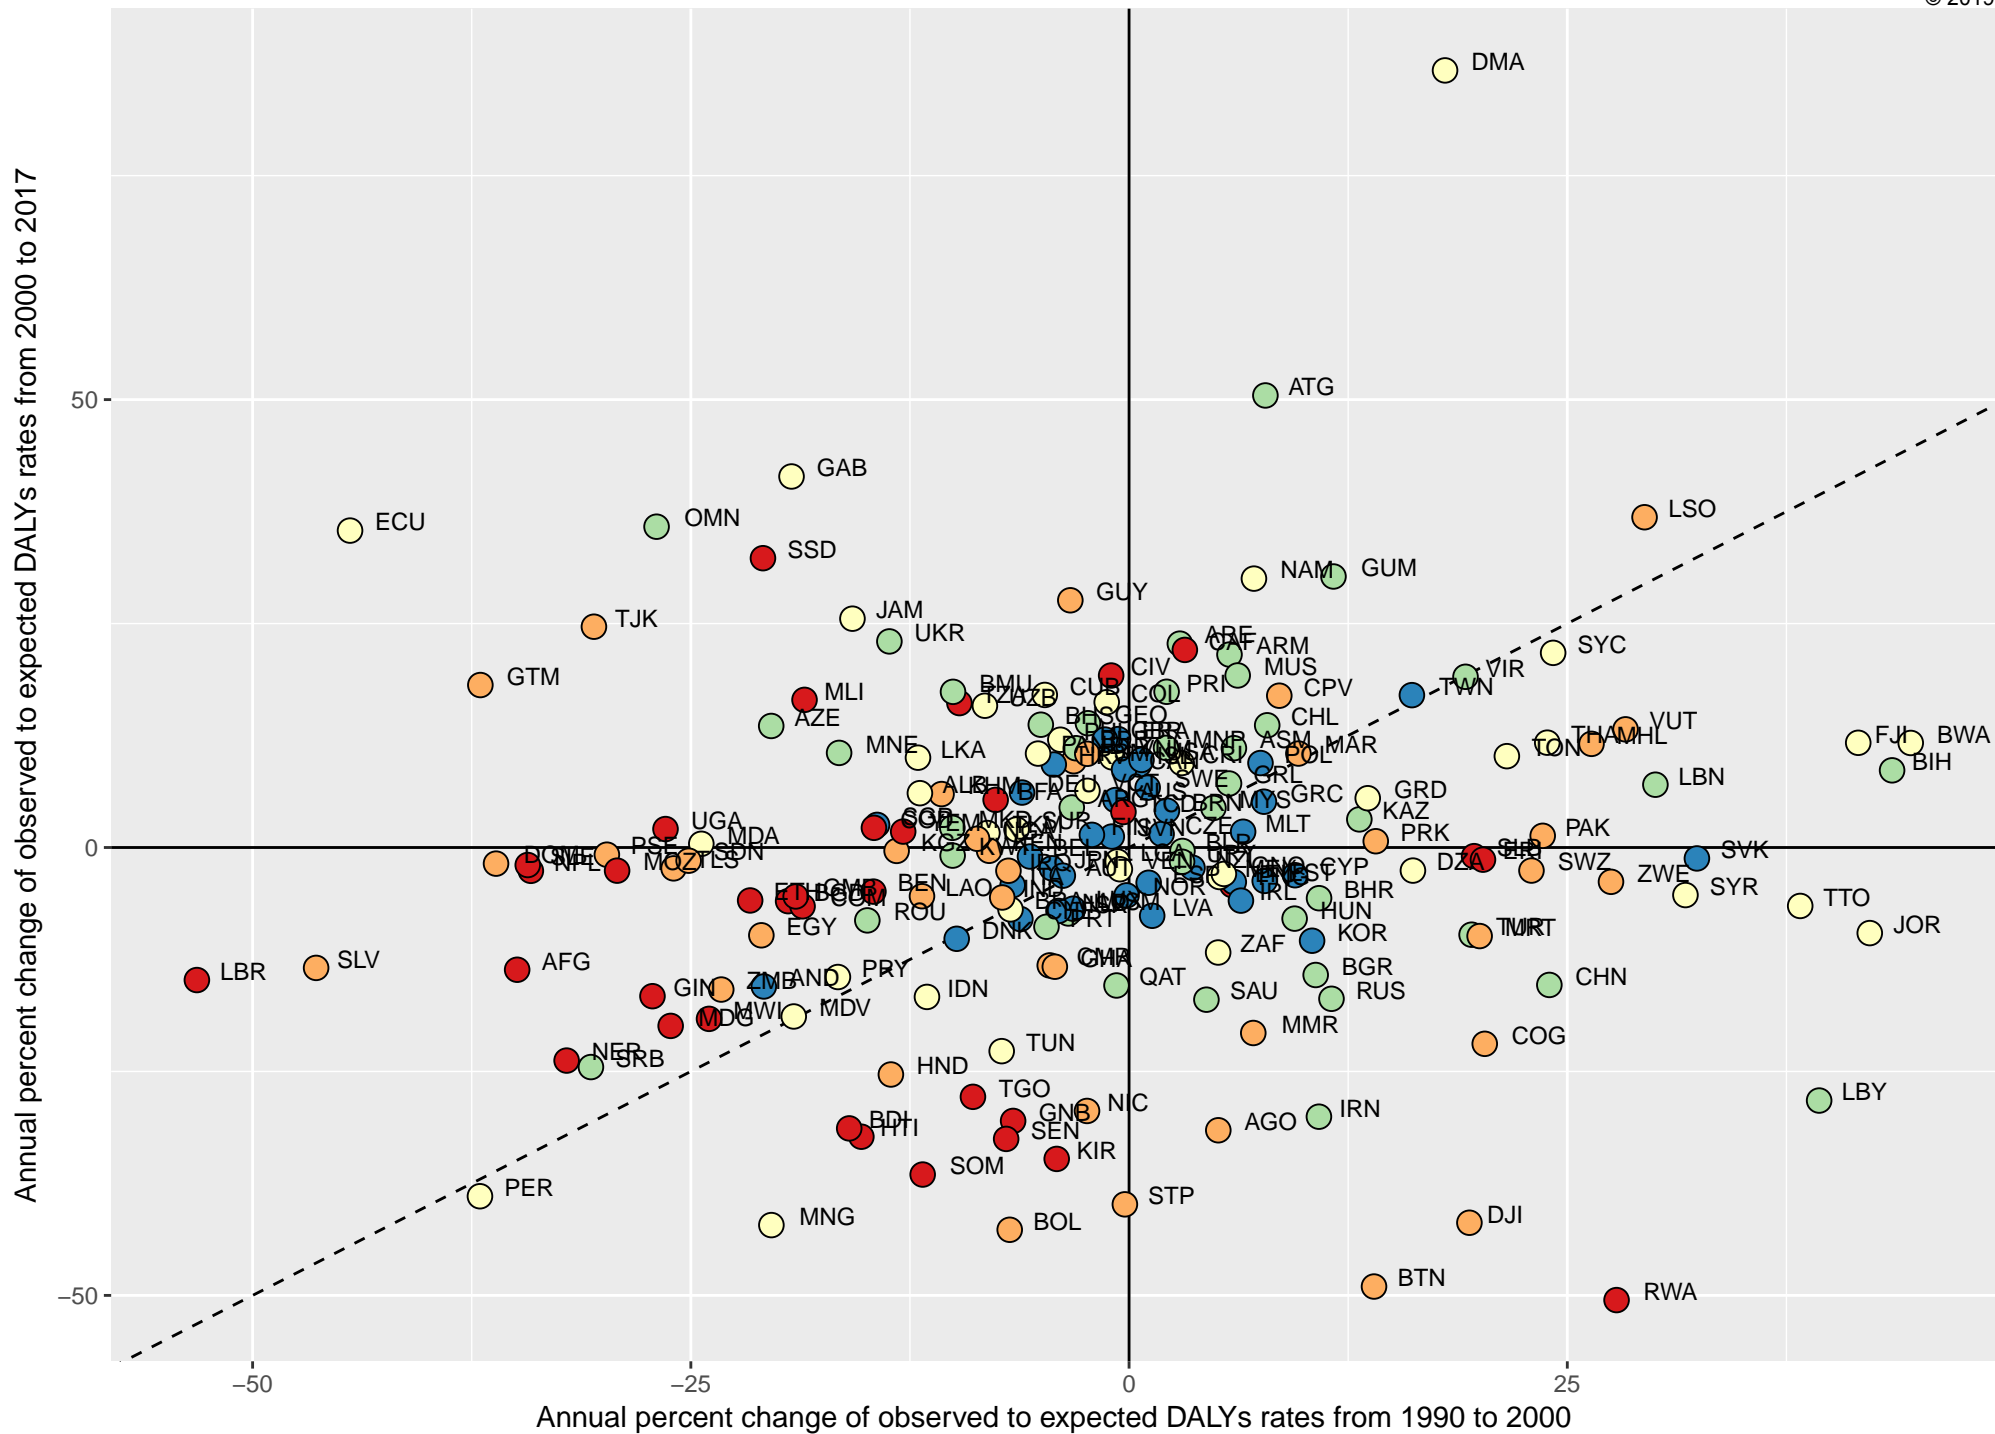

eFigure 6k. Annual percent change of observed to expected (O:E) all-cause DALY rates in <20 years from 1990 to 2000 versus 2000 to 2017 (graph subsetting to +/- 50%)

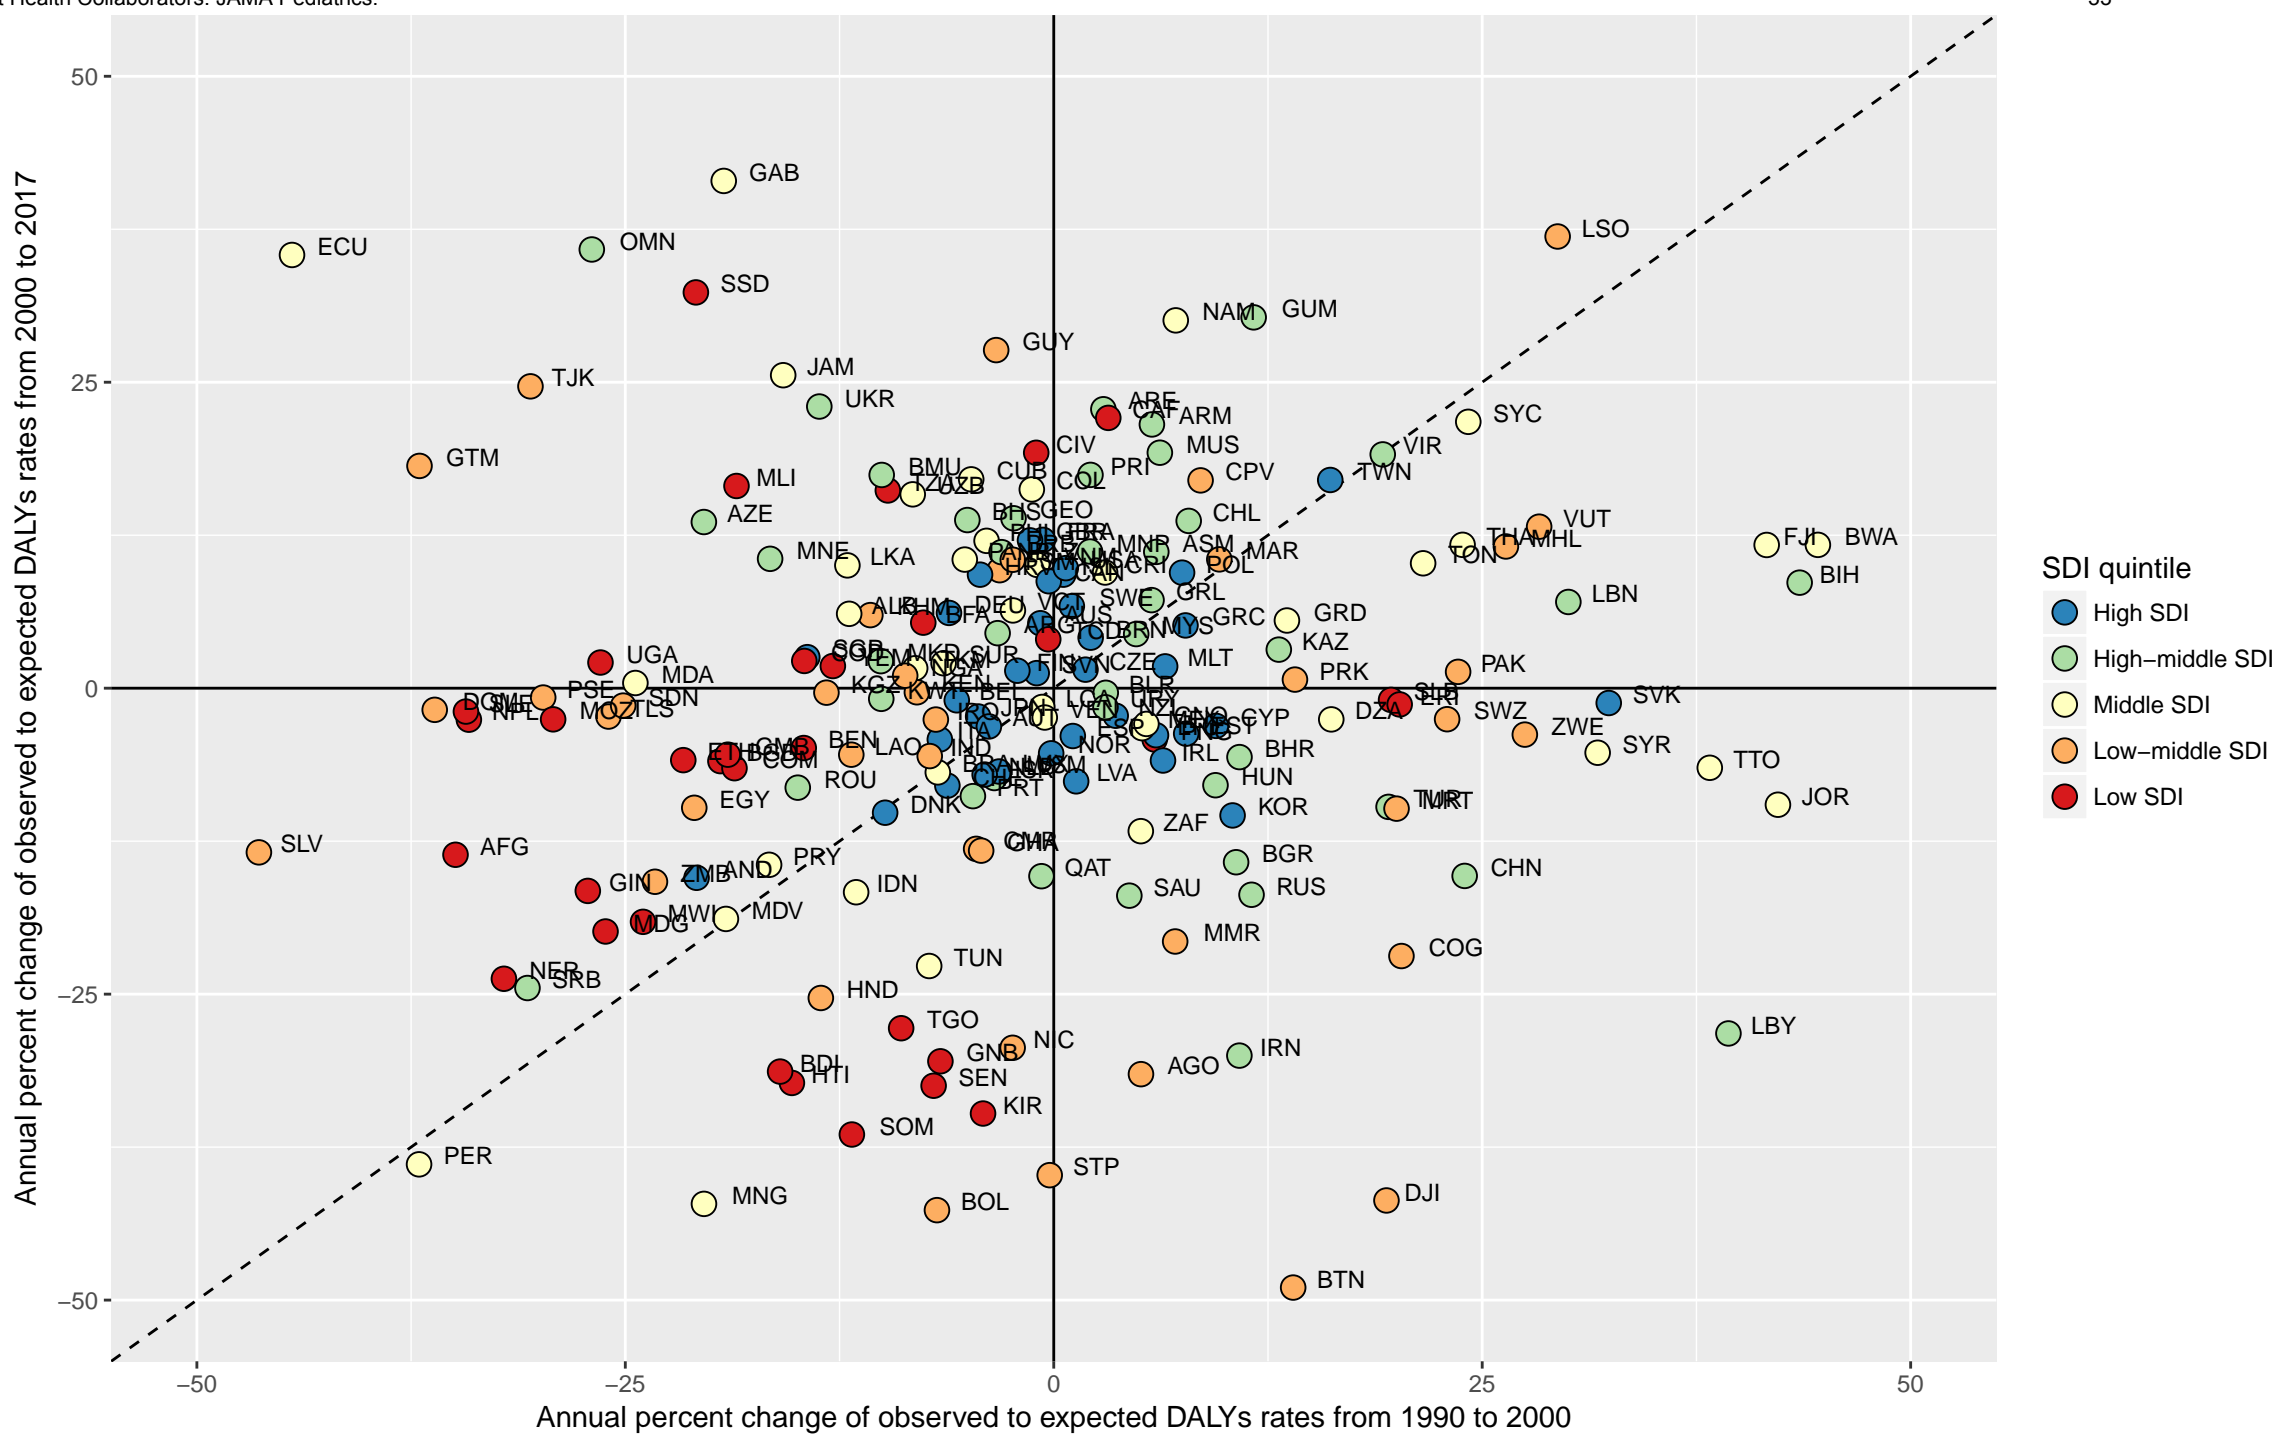

Annual percent change of observed versus expected (O:E) disability-adjusted life years (DALYs) rates by country for 1990 to 2000 versus 2000 to 2017 are plotted by country. In each pair of panels, the right panel focuses on changes within +/-50%. Panels a–d plot changes for all children and adolescents less than 20 years of age; panels e–h plot changes for children less than 1; panels i–l plot changes for children between 1 and 4; panels m–p plot changes for children between 5 and 9; and panels q–t plot changes for children between 10 and 19. For each age group, the first plot in the series is the all cause change in O:E rates (i.e., panels a, e, i, m, and q); the second plot in the series is the change in O:E rates associated with communicable, maternal, neonatal, and nutritional (CMNN) conditions (i.e., panels b, f, j, and r); the third plot in the series is the change in O:E rates associated with non-communicable diseases (NCDs – i.e., panels c, g, k, s); and the fourth plot in the series is the change in O:E rates associated with injuries (i.e., panels d, h, l, t). For each, countries in different socio-demographic index (SDI) quintiles are plotted with different countries. Abbreviations: DALY=disability-adjusted life year, AFG – Afghanistan, AGO – Angola, ALB – Albania, AND – Andorra, ARE – United Arab Emirates, ARG – Argentina, ARM – Armenia, ASM – American Samoa, ATG – Antigua and Barbuda, AUS – Australia, AUT – Austria, AZE – Azerbaijan, BDI – Burundi, BEL – Belgium, BEN – Benin, BFA – Burkina Faso, BGD – Bangladesh, BGR – Bulgaria, BHR – Bahrain, BHS – The Bahamas, BIH – Bosnia and Herzegovina, BLR – Belarus, BLZ – Belize, BMU – Bermuda, BOL – Bolivia, BRA – Brazil, BRB – Barbados, BRN – Brunei, BTN – Bhutan, BWA – Botswana, CAF – Central African Republic, CAN – Canada, CHE – Switzerland, CHL – Chile, CHN – China, CIV – Cote d'Ivoire, CMR – Cameroon, COD – Democratic Republic of the Congo, COG – Congo, COL – Colombia, COM – Comoros, CPV – Cape Verde, CRI – Costa Rica, CUB – Cuba, CYP – Cyprus, CZE – Czech Republic, DEU – Germany, DJI – Djibouti, DMA – Dominica, DNK – Denmark, DOM – Dominican Republic, DZA – Algeria, ECU – Ecuador, EGY – Egypt, ERI – Eritrea, ESP – Spain, EST – Estonia, ETH – Ethiopia, FIN – Finland, FJI – Fiji, FRA – France, FSM – Federated States of Micronesia, G – Global, GAB – Gabon, GBR – United Kingdom, GEO – Georgia, GHA – Ghana, GIN – Guinea, GMB – The Gambia, GNB – Guinea-Bissau, GNQ – Equatorial Guinea, GRC – Greece, GRD – Grenada, GRL – Greenland, GTM – Guatemala, GUM – Guam, GUY – Guyana, HND – Honduras, HRV – Croatia, HTI – Haiti, HUN – Hungary, IDN – Indonesia, IND – India, IRL – Ireland, IRN – Iran, IRQ – Iraq, ISL – Iceland, ISR – Israel, ITA – Italy, JAM – Jamaica, JOR – Jordan, JPN – Japan, KAZ – Kazakhstan, KEN – Kenya, KGZ – Kyrgyzstan, KHM – Cambodia, KIR – Kiribati, KOR – South Korea, KWT – Kuwait, LAO – Laos, LBN – Lebanon, LBR – Liberia, LBY – Libya, LCA – Saint Lucia, LKA – Sri Lanka, LSO – Lesotho, LTU – Lithuania, LUX – Luxembourg, LVA – Latvia, MAR – Morocco, MDA – Moldova, MDG – Madagascar, MDV – Maldives, MEX – Mexico, MHL – Marshall Islands, MKD – Macedonia, MLI – Mali, MLT – Malta, MMR – Myanmar, MNE – Montenegro, MNG – Mongolia, MNP – Northern Mariana Islands, MOZ – Mozambique, MRT – Mauritania, MUS – Mauritius, MWI – Malawi, MYS – Malaysia, NAM – Namibia, NER – Niger, NGA – Nigeria, NIC – Nicaragua, NLD – Netherlands, NOR – Norway, NPL – Nepal, NZL – New Zealand, OMN – Oman, PAK – Pakistan, PAN – Panama, PER – Peru, PHL – Philippines, PNG – Papua New Guinea, POL – Poland, PRI – Puerto Rico, PRK – North Korea, PRT – Portugal, PRY – Paraguay, PSE – Palestine, QAT – Qatar, ROU – Romania, RUS – Russian Federation, RWA – Rwanda, SAU – Saudi Arabia, SDN – Sudan, SEN – Senegal, SGP – Singapore, SLB – Solomon Islands, SLE – Sierra Leone, SLV – El Salvador, SOM – Somalia, SRB – Serbia, SSD – South Sudan, STP – Sao Tome and Principe, SUR – Suriname, SVK – Slovakia, SVN – Slovenia, SWE – Sweden, SWZ – Swaziland, SYC – Seychelles, SYR – Syria, TCD – Chad, TGO – Togo, THA – Thailand, TJK – Tajikistan, TKM – Turkmenistan, TLS – Timor-Leste, TON – Tonga, TTO – Trinidad and Tobago, TUN – Tunisia, TUR – Turkey, TWN – Taiwan, TZA – Tanzania, UGA – Uganda, UKR – Ukraine, URY – Uruguay, USA – United States, UZB – Uzbekistan, VCT – Saint Vincent and the Grenadines, VEN – Venezuela, VIR – Virgin Islands, U.S., VNM – Vietnam, VUT – Vanuatu, WSM – Samoa, YEM – Yemen, ZAF – South Africa, ZMB – Zambia, ZWE – Zimbabwe

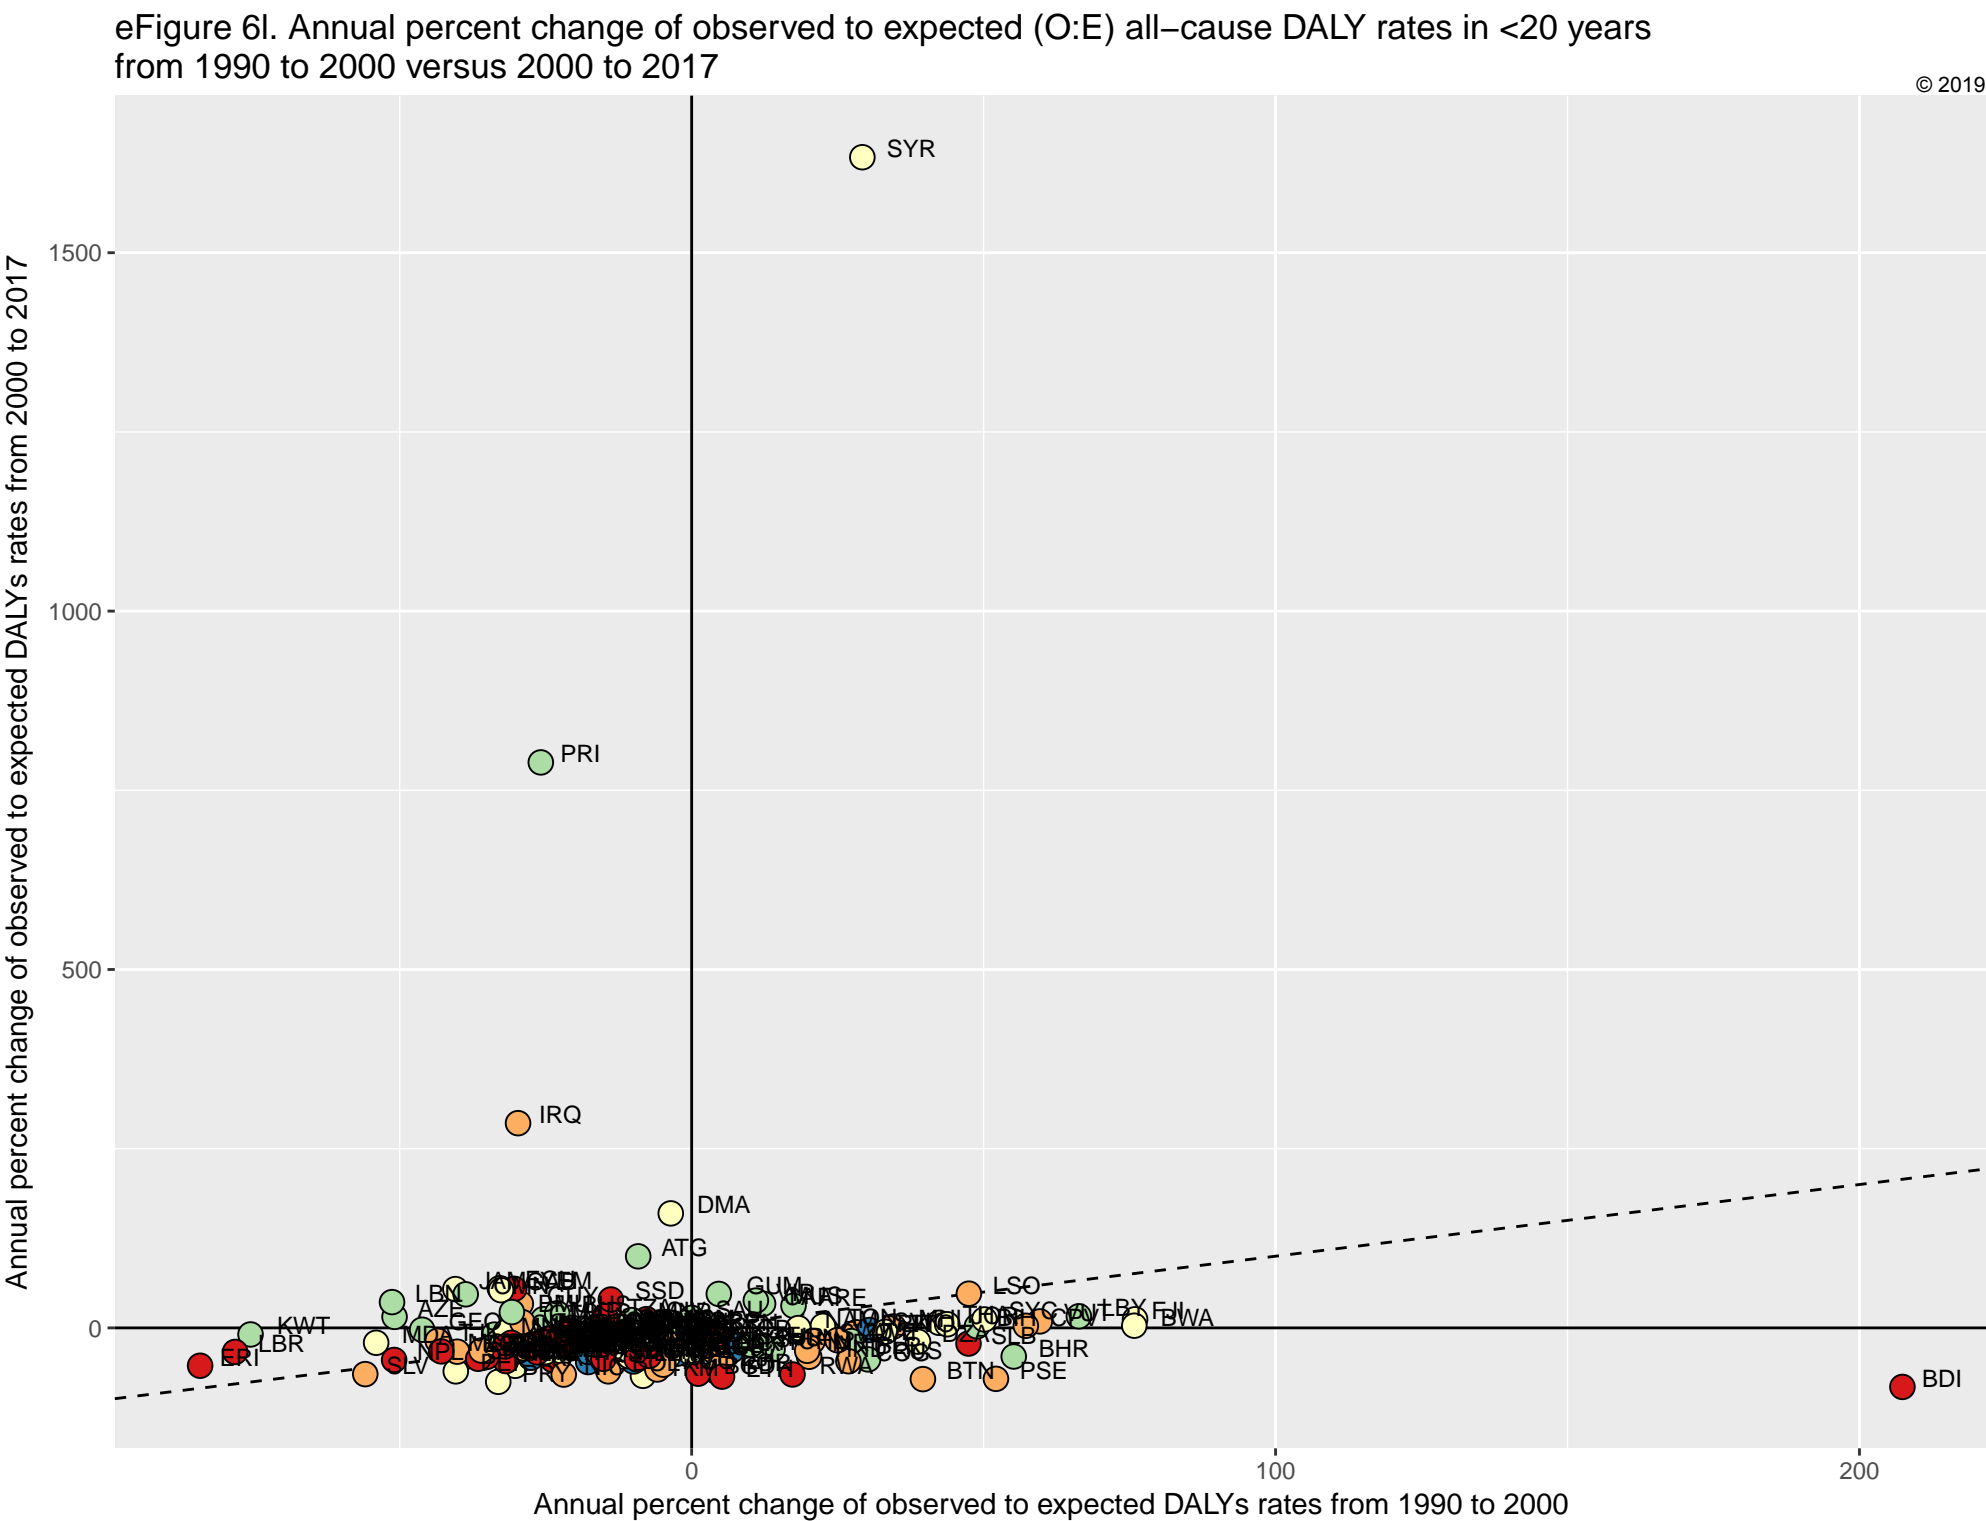

© 2019 GBD 2017 Child and Adolescent Health Collaborators. JAMA Pediatrics.

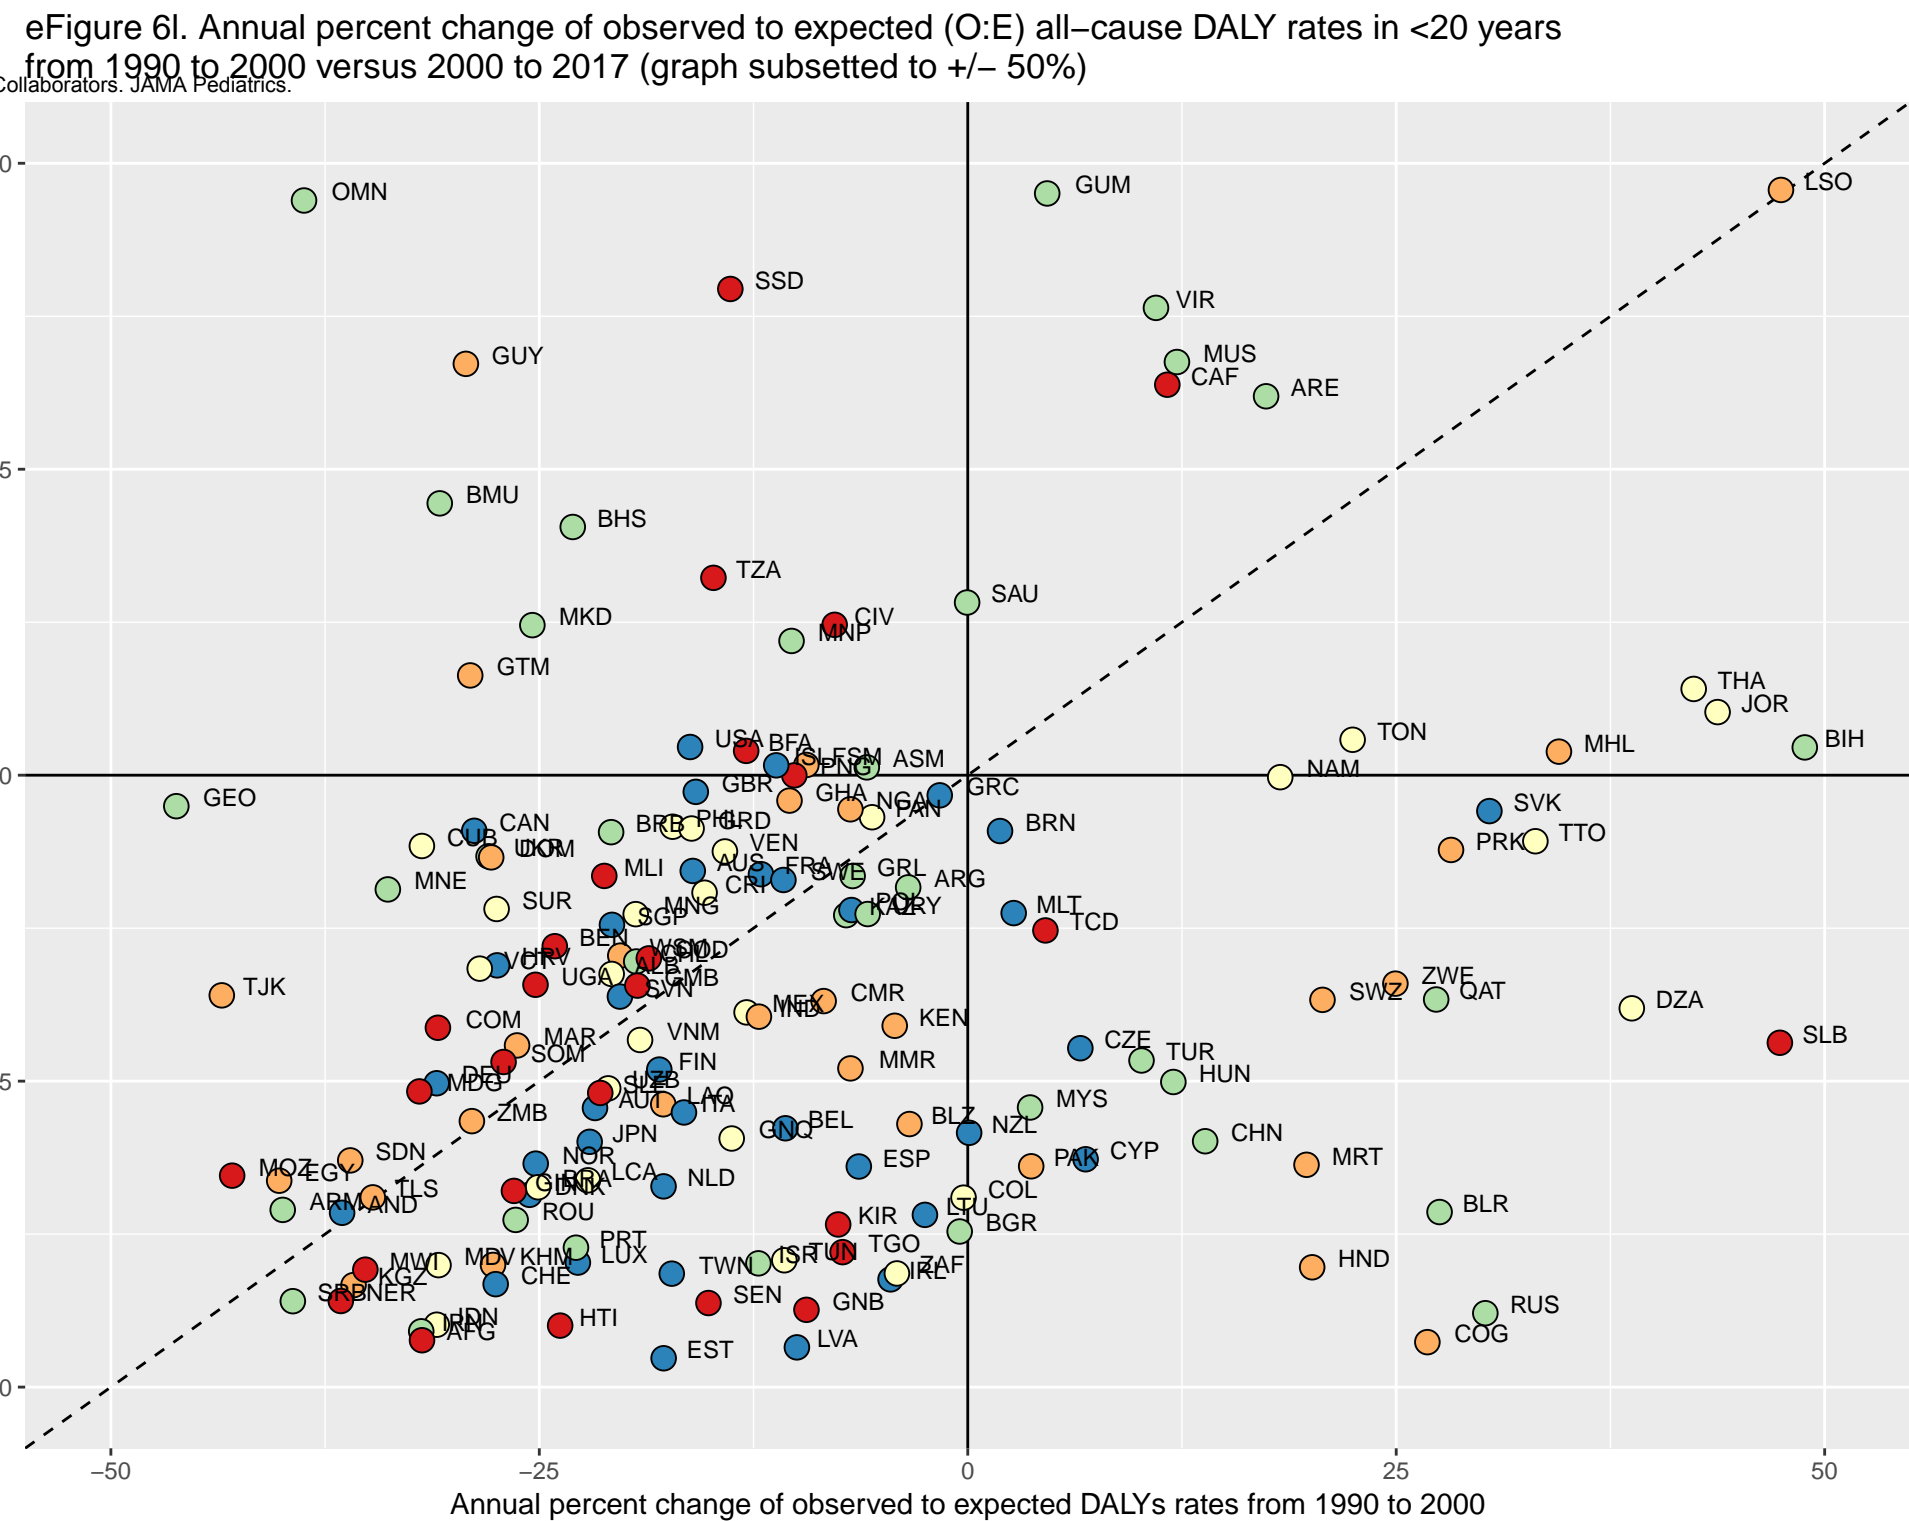

34

Annual percent change of observed versus expected (O:E) disability-adjusted life years (DALYs) rates by country for 1990 to 2000 versus 2000 to 2017 are plotted by country. In each pair of panels, the right panel focuses on changes within  $\pm 50\%$ . Panels a–d plot changes for all children and adolescents less than 20 years of age; panels e–h plot changes for children less than 1; panels i–l plot changes for children between 1 and 4; panels m–p plot changes for children between 5 and 9; and panels q–t plot changes for children between 10 and 19. For each age group, the first plot in the series is the all cause change in O:E rates (i.e., panels a, e, i, m, and q); the second plot in the series is the change in O:E rates associated with communicable, maternal, neonatal, and nutritional (CMNN) conditions (i.e., panels b, f, j, and r); the third plot in the series is the change in O:E rates associated with non-communicable diseases (NCDs – i.e., panels c, g, k, s); and the fourth plot in the series is the change in O:E rates associated with injuries (i.e., panels d, h, l, t). For each, countries in different socio-demographic index (SDI) quintiles are plotted with different colors. Abbreviations: DALY=disability-adjusted life year, AFG – Afghanistan, AGO – Angola, ALB – Albania, AND – Andorra, ARE – United Arab Emirates, ARG – Argentina, ARM – Armenia, ASM – American Samoa, ATG – Antigua and Barbuda, AUS – Australia, AUT – Austria, AZE – Azerbaijan, BDI – Burundi, BEL – Belgium, BEN – Benin, BFA – Burkina Faso, BGD – Bangladesh, BGR – Bulgaria, BHR – Bahrain, BHS – The Bahamas, BIH – Bosnia and Herzegovina, BLR – Belarus, BLZ – Belize, BMU – Bermuda, BOL – Bolivia, BRA – Brazil, BRB – Barbados, BRN – Brunei, BTN – Bhutan, BWA – Botswana, CAF – Central African Republic, CAN – Canada, CHE – Switzerland, CHL – Chile, CHN – China, CIV – Cote d'Ivoire, CMR – Cameroon, COD – Democratic Republic of the Congo, COG – Congo, COL – Colombia, COM – Comoros, CPV – Cape Verde, CRI – Costa Rica, CUB – Cuba, CYP – Cyprus, CZE – Czech Republic, DEU – Germany, DJI – Djibouti, DMA – Dominica, DNK – Denmark, DOM – Dominican Republic, DZA – Algeria, ECU – Ecuador, EGY – Egypt, ERI – Eritrea, ESP – Spain, EST – Estonia, ETH – Ethiopia, FIN – Finland, FJI – Fiji, FRA – France, FSM – Federated States of Micronesia, G – Global, GAB – Gabon, GBR – United Kingdom, GEO – Georgia, GHA – Ghana, GIN – Guinea, GMB – The Gambia, GNB – Guinea-Bissau, GNQ – Equatorial Guinea, GRC – Greece, GRD – Grenada, GRL – Greenland, GTM – Guatemala, GUM – Guam, GUY – Guyana, HND – Honduras, HRV – Croatia, HTI – Haiti, HUN – Hungary, IDN – Indonesia, IND – India, IRL – Ireland, IRN – Iran, IRQ – Iraq, ISL – Iceland, ISR – Israel, ITA – Italy, JAM – Jamaica, JOR – Jordan, JPN – Japan, KAZ – Kazakhstan, KEN – Kenya, KGZ – Kyrgyzstan, KHM – Cambodia, KIR – Kiribati, KOR – South Korea, KWT – Kuwait, LAO – Laos, LBN – Lebanon, LBR – Liberia, LBY – Libya, LCA – Saint Lucia, LKA – Sri Lanka, LSO – Lesotho, LTU – Lithuania, LUX – Luxembourg, LVA – Latvia, MAR – Morocco, MDA – Moldova, MDG – Madagascar, MDV – Maldives, MEX – Mexico, MHL – Marshall Islands, MKD – Macedonia, MLI – Mali, MLT – Malta, MMR – Myanmar, MNE – Montenegro, MNG – Mongolia, MNP – Northern Mariana Islands, MOZ – Mozambique, MRT – Mauritania, MUS – Mauritius, MWI – Malawi, MYS – Malaysia, NAM – Namibia, NER – Niger, NGA – Nigeria, NIC – Nicaragua, NLD – Netherlands, NOR – Norway, NPL – Nepal, NZL – New Zealand, OMN – Oman, PAK – Pakistan, PAN – Panama, PER – Peru, PHL – Philippines, PNG – Papua New Guinea, POL – Poland, PRI – Puerto Rico, PRK – North Korea, PRT – Portugal, PRY – Paraguay, PSE – Palestine, QAT – Qatar, ROU – Romania, RUS – Russian Federation, RWA – Rwanda, SAU – Saudi Arabia, SDN – Sudan, SEN – Senegal, SGP – Singapore, SLB – Solomon Islands, SLE – Sierra Leone, SLV – El Salvador, SOM – Somalia, SRB – Serbia, SSD – South Sudan, STP – Sao Tome and Principe, SUR – Suriname, SVK – Slovakia, SVN – Slovenia, SWE – Sweden, SWZ – Swaziland, SYC – Seychelles, SYR – Syria, TCD – Chad, TGO – Togo, THA – Thailand, TJK – Tajikistan, TKM – Turkmenistan, TLS – Timor-Leste, TON – Tonga, TTO – Trinidad and Tobago, TUN – Tunisia, TUR – Turkey, TWN – Taiwan, TZA – Tanzania, UGA – Uganda, UKR – Ukraine, URY – Uruguay, USA – United States, UZB – Uzbekistan, VCT – Saint Vincent and the Grenadines, VEN – Venezuela, VIR – Virgin Islands, U.S., VNM – Vietnam, VUT – Vanuatu, WSM – Samoa, YEM – Yemen, ZAF – South Africa, ZMB – Zambia, ZWE – Zimbabwe

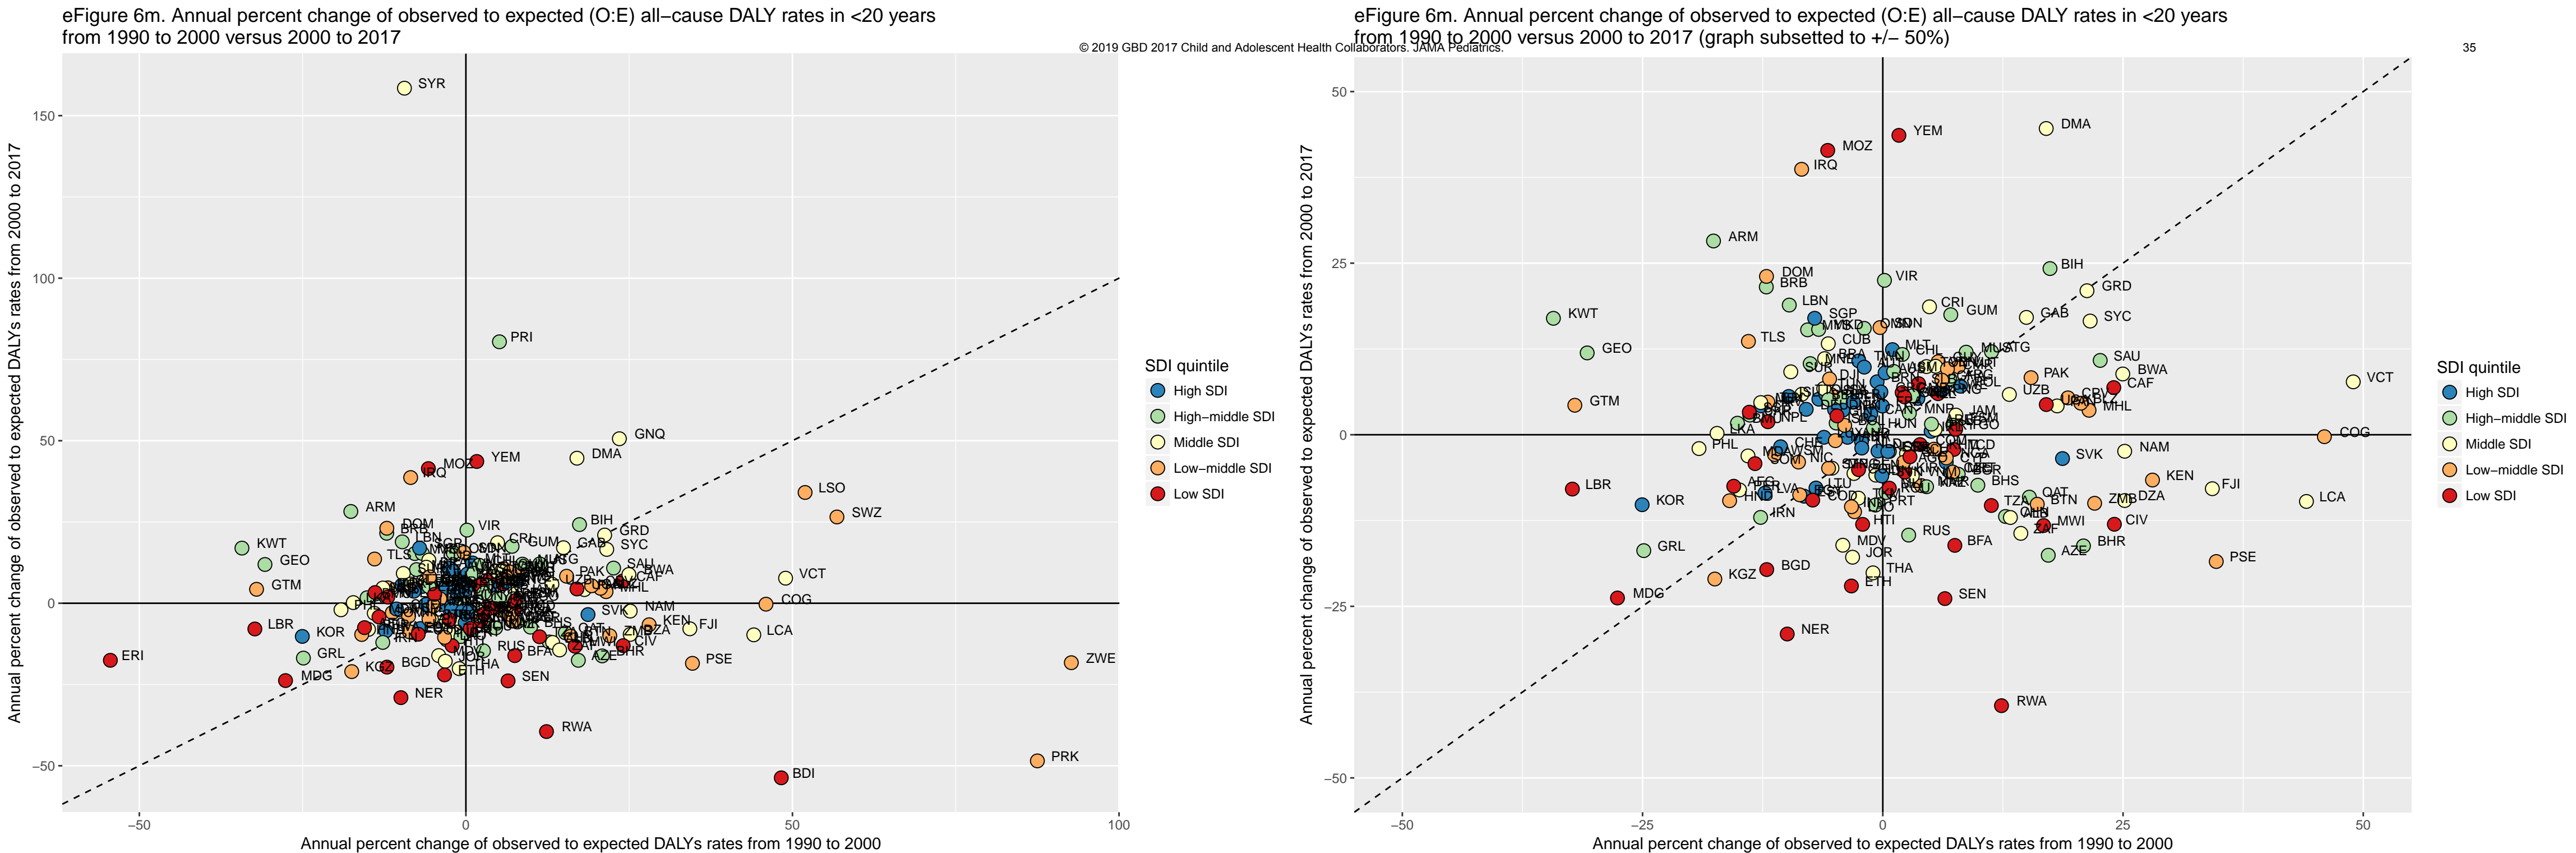

Annual percent change of observed versus expected (O:E) disability-adjusted life years (DALYs) rates by country for 1990 to 2000 versus 2000 to 2017 are plotted by country. In each pair of panels, the right panel focuses on changes within +/-50%. Panels a–d plot changes for all children and adolescents less than 20 years of age; panels e–h plot changes for children less than 1; panels i–l plot changes for children between 1 and 4; panels m–p plot changes for children between 5 and 9; and panels q–t plot changes for children between 10 and 19. For each age group, the first plot in the series is the all cause change in O:E rates (i.e., panels a, e, i, m, and q); the second plot in the series is the change in O:E rates associated with communicable, maternal, neonatal, and nutritional (CMNN) conditions (i.e., panels b, f, j, and r); the third plot in the series is the change in O:E rates associated with non-communicable diseases (NCDs – i.e., panels c, g, k, s); and the fourth plot in the series is the change in O:E rates associated with injuries (i.e., panels d, h, l, t). For each, countries in different socio-demographic index (SDI) quintiles are plotted with different countries. Abbreviations: DALY=disability-adjusted life year, AFG – Afghanistan, AGO – Angola, ALB – Albania, AND – Andorra, ARE – United Arab Emirates, ARG – Argentina, ARM – Armenia, ASM – American Samoa, ATG – Antigua and Barbuda, AUS – Australia, AUT – Austria, AZE – Azerbaijan, BDI – Burundi, BEL – Belgium, BEN – Benin, BFA – Burkina Faso, BGD – Bangladesh, BGR – Bulgaria, BHR – Bahrain, BHS – The Bahamas, BIH – Bosnia and Herzegovina, BLR – Belarus, BLZ – Belize, BMU – Bermuda, BOL – Bolivia, BRA – Brazil, BRB – Barbados, BRN – Brunei, BTN – Bhutan, BWA – Botswana, CAF – Central African Republic, CAN – Canada, CHE – Switzerland, CHL – Chile, CHN – China, CIV – Cote d'Ivoire, CMR – Cameroon, COD – Democratic Republic of the Congo, COG – Congo, COL – Colombia, COM – Comoros, CPV – Cape Verde, CRI – Costa Rica, CUB – Cuba, CYP – Cyprus, CZE – Czech Republic, DEU – Germany, DJI – Djibouti, DMA – Dominica, DNK – Denmark, DOM – Dominican Republic, DZA – Algeria, ECU – Ecuador, EGY – Egypt, ERI – Eritrea, ESP – Spain, EST – Estonia, ETH – Ethiopia, FIN – Finland, FJI – Fiji, FRA – France, FSM – Federated States of Micronesia, G – Global, GAB – Gabon, GBR – United Kingdom, GEO – Georgia, GHA – Ghana, GIN – Guinea, GMB – The Gambia, GNB – Guinea-Bissau, GNQ – Equatorial Guinea, GRC – Greece, GRD – Grenada, GRL – Greenland, GTM – Guatemala, GUM – Guam, GUY – Guyana, HND – Honduras, HRV – Croatia, HTI – Haiti, HUN – Hungary, IDN – Indonesia, IND – India, IRL – Ireland, IRN – Iran, IRQ – Iraq, ISL – Iceland, ISR – Israel, ITA – Italy, JAM – Jamaica, JOR – Jordan, JPN – Japan, KAZ – Kazakhstan, KEN – Kenya, KGZ – Kyrgyzstan, KHM – Cambodia, KIR – Kiribati, KOR – South Korea, KWT – Kuwait, LAO – Laos, LBN – Lebanon, LBR – Liberia, LBY – Libya, LCA – Saint Lucia, LKA – Sri Lanka, LSO – Lesotho, LTU – Lithuania, LUX – Luxembourg, LVA – Latvia, MAR – Morocco, MDA – Moldova, MDG – Madagascar, MDV – Maldives, MEX – Mexico, MHL – Marshall Islands, MKD – Macedonia, MLI – Mali, MLT – Malta, MMR – Myanmar, MNE – Montenegro, MNG – Mongolia, MNP – Northern Mariana Islands, MOZ – Mozambique, MRT – Mauritania, MUS – Mauritius, MWI – Malawi, MYS – Malaysia, NAM – Namibia, NER – Niger, NGA – Nigeria, NIC – Nicaragua, NLD – Netherlands, NOR – Norway, NPL – Nepal, NZL – New Zealand, OMN – Oman, PAK – Pakistan, PAN – Panama, PER – Peru, PHL – Philippines, PNG – Papua New Guinea, POL – Poland, PRI – Puerto Rico, PRK – North Korea, PRT – Portugal, PRY – Paraguay, PSE – Palestine, QAT – Qatar, ROU – Romania, RUS – Russian Federation, RWA – Rwanda, SAU – Saudi Arabia, SDN – Sudan, SEN – Senegal, SGP – Singapore, SLB – Solomon Islands, SLE – Sierra Leone, SLV – El Salvador, SOM – Somalia, SRB – Serbia, SSD – South Sudan, STP – Sao Tome and Principe, SUR – Suriname, SVK – Slovakia, SVN – Slovenia, SWE – Sweden, SWZ – Swaziland, SYC – Seychelles, SYR – Syria, TCD – Chad, TGO – Togo, THA – Thailand, TJK – Tajikistan, TKM – Turkmenistan, TLS – Timor-Leste, TON – Tonga, TTO – Trinidad and Tobago, TUN – Tunisia, TUR – Turkey, TWN – Taiwan, TZA – Tanzania, UGA – Uganda, UKR – Ukraine, URY – Uruguay, USA – United States, UZB – Uzbekistan, VCT – Saint Vincent and the Grenadines, VEN – Venezuela, VIR – Virgin Islands, U.S., VNM – Vietnam, VUT – Vanuatu, WSM – Samoa, YEM – Yemen, ZAF – South Africa, ZMB – Zambia, ZWE – Zimbabwe

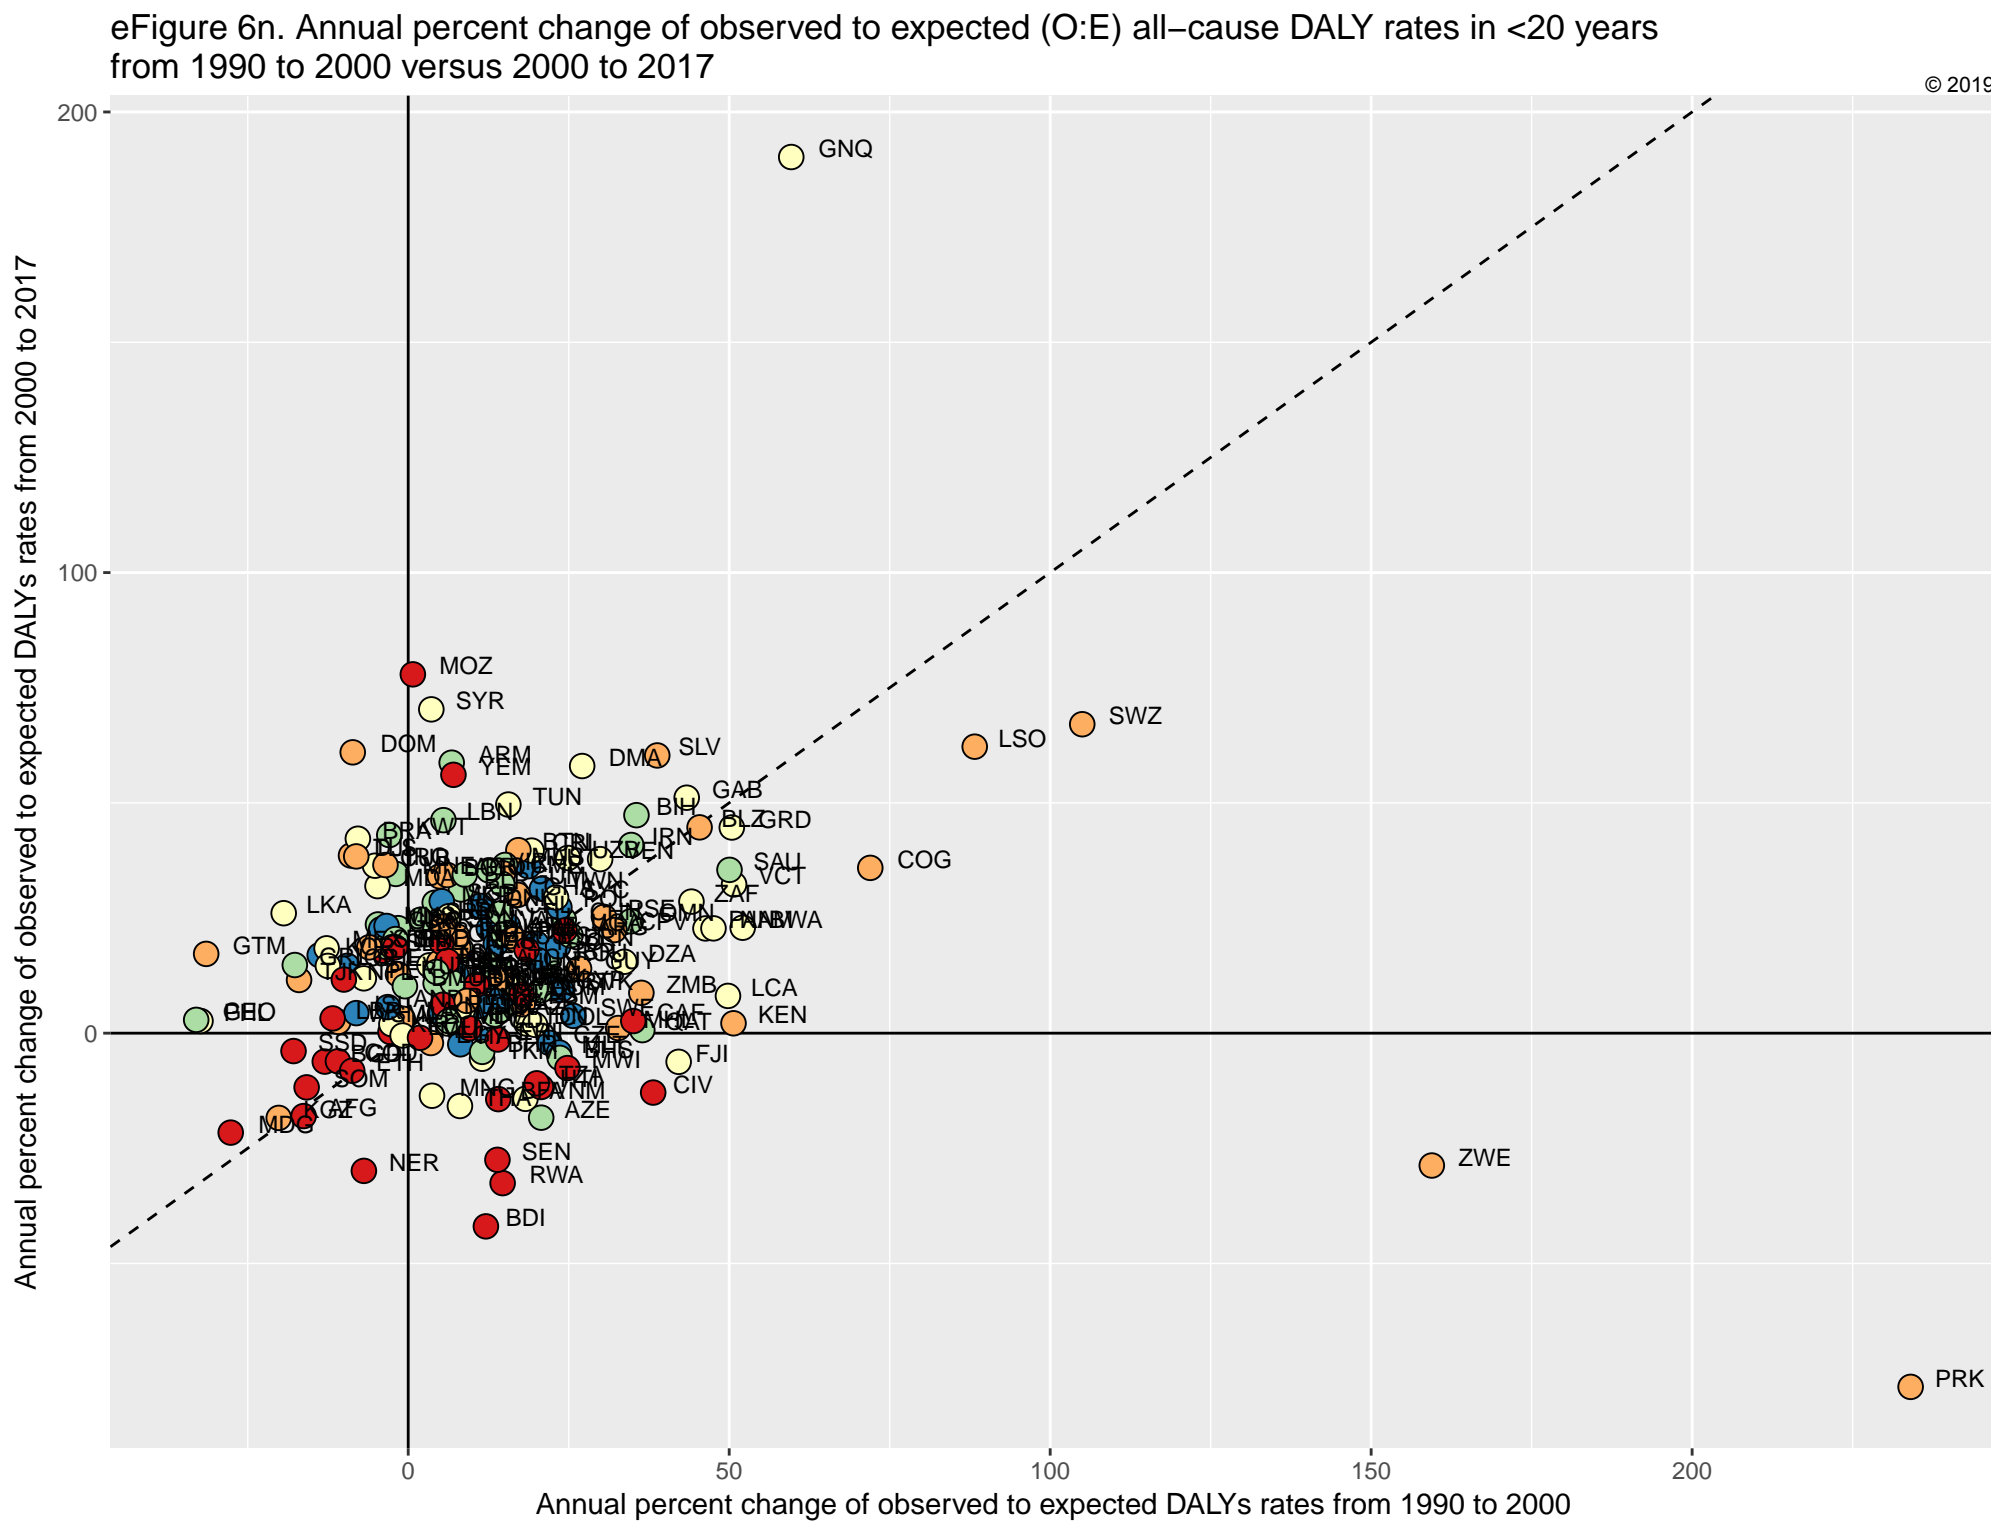

© 2019 GBD 2017 Child and Adolescent Health Collaborators. JAMA Pediatrics.

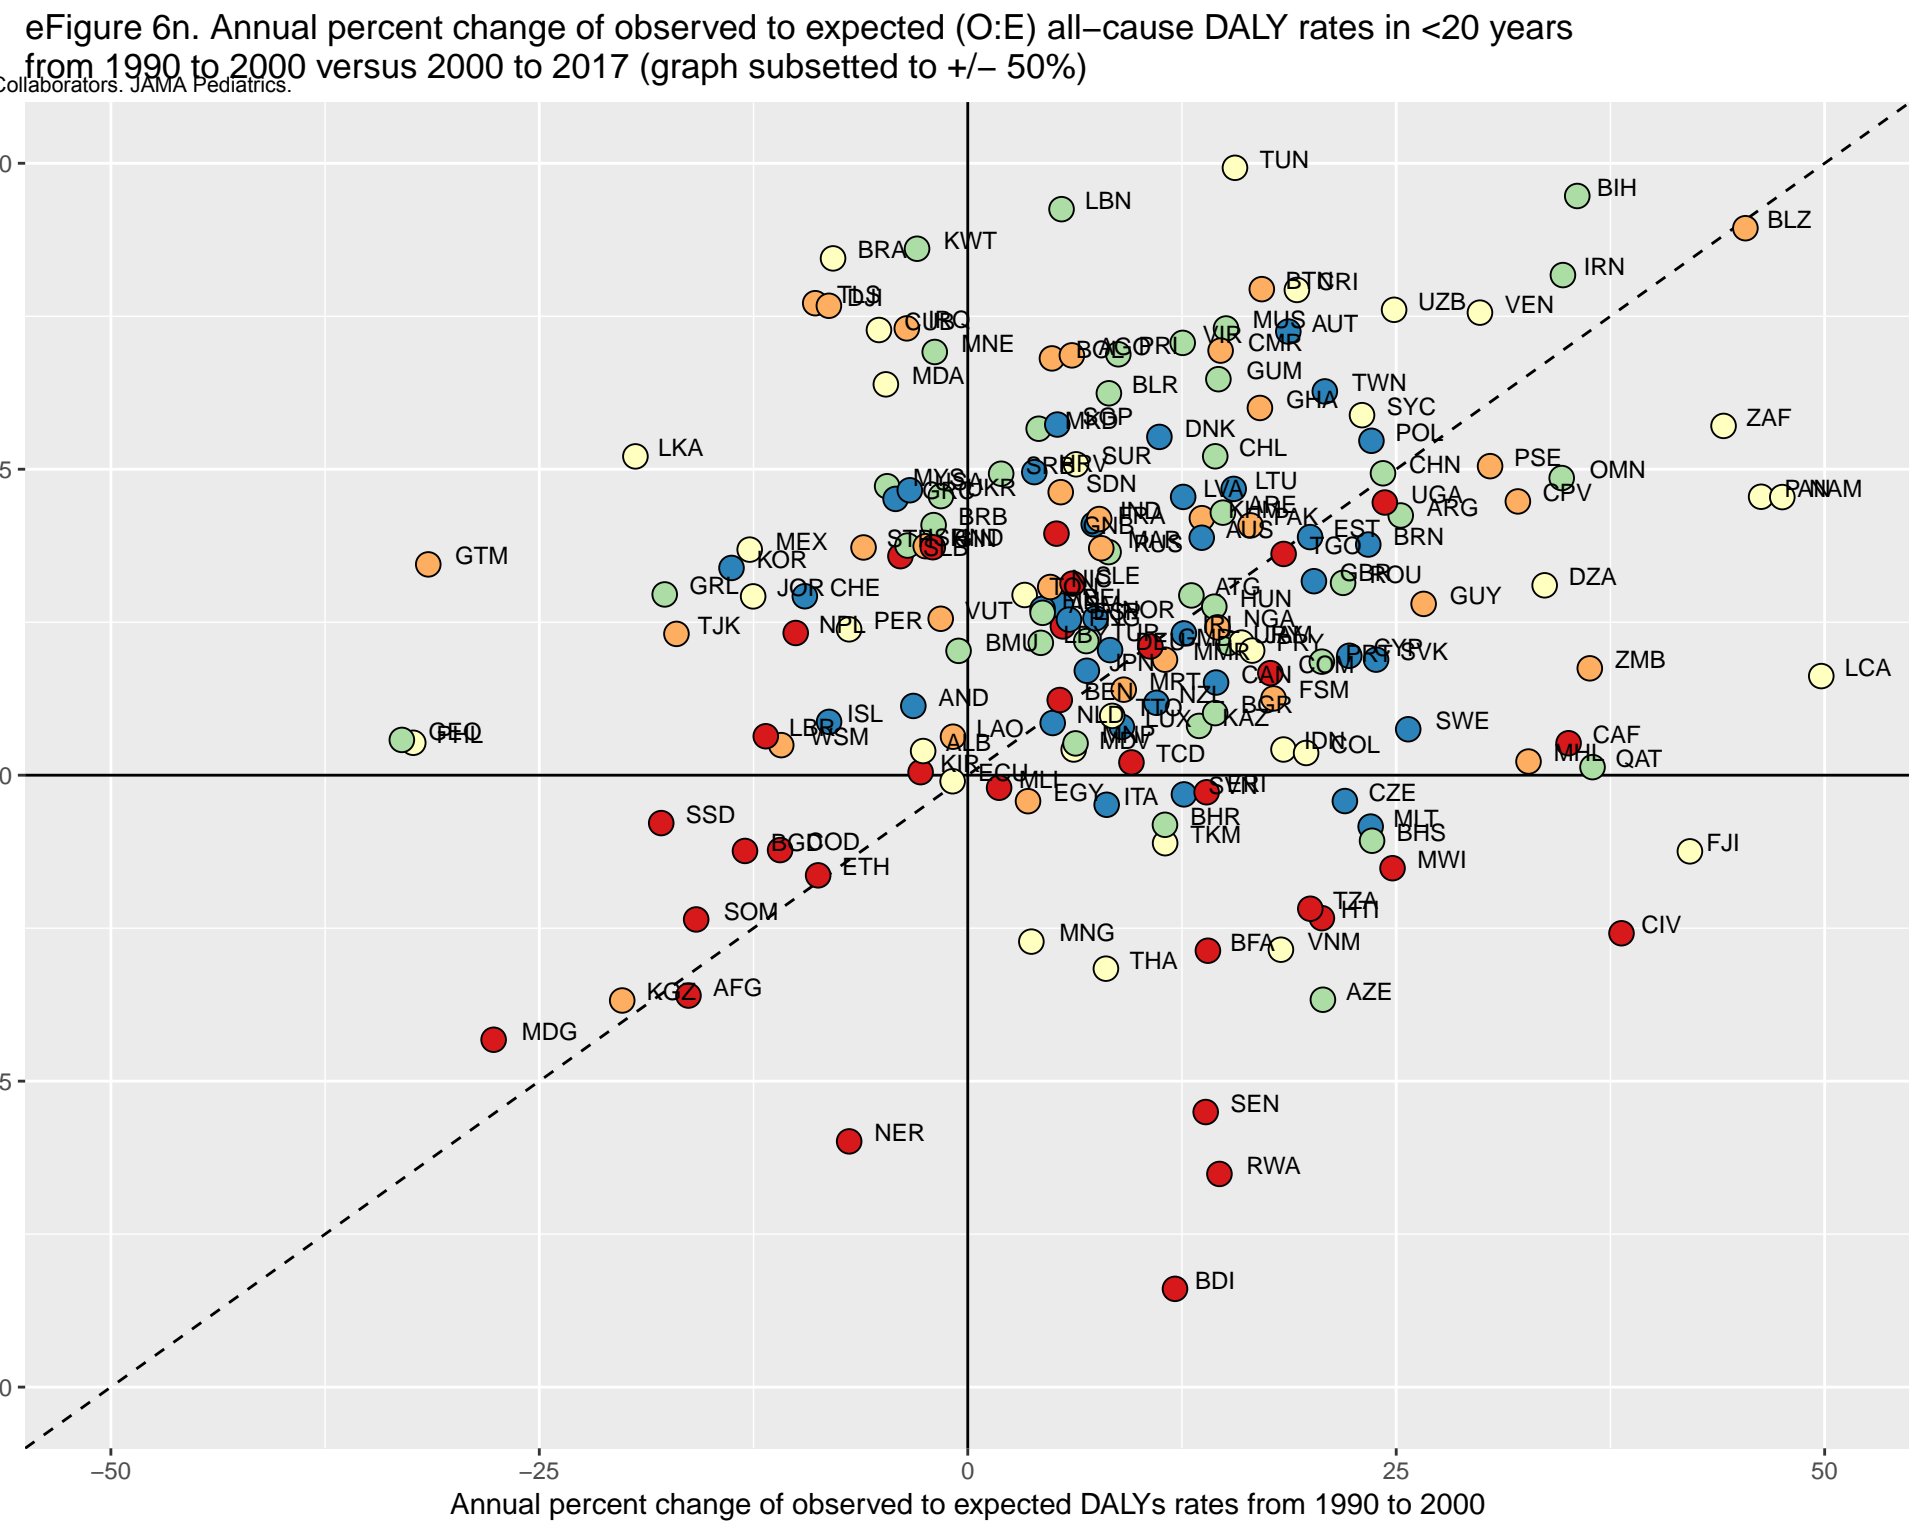

36

Annual percent change of observed versus expected (O:E) disability-adjusted life years (DALYs) rates by country for 1990 to 2000 versus 2000 to 2017 are plotted by country. In each pair of panels, the right panel focuses on changes within  $\pm 50\%$ . Panels a–d plot changes for all children and adolescents less than 20 years of age; panels e–h plot changes for children less than 1; panels i–l plot changes for children between 1 and 4; panels m–p plot changes for children between 5 and 9; and panels q–t plot changes for children between 10 and 19. For each age group, the first plot in the series is the all cause change in O:E rates (i.e., panels a, e, i, m, and q); the second plot in the series is the change in O:E rates associated with communicable, maternal, neonatal, and nutritional (CMNN) conditions (i.e., panels b, f, j, and r); the third plot in the series is the change in O:E rates associated with non-communicable diseases (NCDs – i.e., panels c, g, k, s); and the fourth plot in the series is the change in O:E rates associated with injuries (i.e., panels d, h, l, t). For each, countries in different socio-demographic index (SDI) quintiles are plotted with different countries. Abbreviations: DALY=disability-adjusted life year, AFG – Afghanistan, AGO – Angola, ALB – Albania, AND – Andorra, ARE – United Arab Emirates, ARG – Argentina, ARM – Armenia, ASM – American Samoa, ATG – Antigua and Barbuda, AUS – Australia, AUT – Austria, AZE – Azerbaijan, BDI – Burundi, BEL – Belgium, BEN – Benin, BFA – Burkina Faso, BGD – Bangladesh, BGR – Bulgaria, BHR – Bahrain, BHS – The Bahamas, BIH – Bosnia and Herzegovina, BLR – Belarus, BLZ – Belize, BMU – Bermuda, BOL – Bolivia, BRA – Brazil, BRB – Barbados, BRN – Brunei, BTN – Bhutan, BWA – Botswana, CAF – Central African Republic, CAN – Canada, CHE – Switzerland, CHL – Chile, CHN – China, CIV – Cote d'Ivoire, CMR – Cameroon, COD – Democratic Republic of the Congo, COG – Congo, COL – Colombia, COM – Comoros, CPV – Cape Verde, CRI – Costa Rica, CUB – Cuba, CYP – Cyprus, CZE – Czech Republic, DEU – Germany, DJI – Djibouti, DMA – Dominica, DNK – Denmark, DOM – Dominican Republic, DZA – Algeria, ECU – Ecuador, EGY – Egypt, ERI – Eritrea, ESP – Spain, EST – Estonia, ETH – Ethiopia, FIN – Finland, FJI – Fiji, FRA – France, FSM – Federated States of Micronesia, G – Global, GAB – Gabon, GBR – United Kingdom, GEO – Georgia, GHA – Ghana, GIN – Guinea, GMB – The Gambia, GNB – Guinea-Bissau, GNQ – Equatorial Guinea, GRC – Greece, GRD – Grenada, GRL – Greenland, GTM – Guatemala, GUM – Guam, GUY – Guyana, HND – Honduras, HRV – Croatia, HTI – Haiti, HUN – Hungary, IDN – Indonesia, IND – India, IRL – Ireland, IRN – Iran, IRQ – Iraq, ISL – Iceland, ISR – Israel, ITA – Italy, JAM – Jamaica, JOR – Jordan, JPN – Japan, KAZ – Kazakhstan, KEN – Kenya, KGZ – Kyrgyzstan, KHM – Cambodia, KIR – Kiribati, KOR – South Korea, KWT – Kuwait, LAO – Laos, LBN – Lebanon, LBR – Liberia, LBY – Libya, LCA – Saint Lucia, LKA – Sri Lanka, LSO – Lesotho, LTU – Lithuania, LUX – Luxembourg, LVA – Latvia, MAR – Morocco, MDA – Moldova, MDG – Madagascar, MDV – Maldives, MEX – Mexico, MHL – Marshall Islands, MKD – Macedonia, MLI – Mali, MLT – Malta, MMR – Myanmar, MNE – Montenegro, MNG – Mongolia, MNP – Northern Mariana Islands, MOZ – Mozambique, MRT – Mauritania, MUS – Mauritius, MWI – Malawi, MYS – Malaysia, NAM – Namibia, NER – Niger, NGA – Nigeria, NIC – Nicaragua, NLD – Netherlands, NOR – Norway, NPL – Nepal, NZL – New Zealand, OMN – Oman, PAK – Pakistan, PAN – Panama, PER – Peru, PHL – Philippines, PNG – Papua New Guinea, POL – Poland, PRI – Puerto Rico, PRK – North Korea, PRT – Portugal, PRY – Paraguay, PSE – Palestine, QAT – Qatar, ROU – Romania, RUS – Russian Federation, RWA – Rwanda, SAU – Saudi Arabia, SDN – Sudan, SEN – Senegal, SGP – Singapore, SLB – Solomon Islands, SLE – Sierra Leone, SLV – El Salvador, SOM – Somalia, SRB – Serbia, SSD – South Sudan, STP – Sao Tome and Principe, SUR – Suriname, SVK – Slovakia, SVN – Slovenia, SWE – Sweden, SWZ – Swaziland, SYC – Seychelles, SYR – Syria, TCD – Chad, TGO – Togo, THA – Thailand, TJK – Tajikistan, TKM – Turkmenistan, TLS – Timor-Leste, TON – Tonga, TTO – Trinidad and Tobago, TUN – Tunisia, TUR – Turkey, TWN – Taiwan, TZA – Tanzania, UGA – Uganda, UKR – Ukraine, URY – Uruguay, USA – United States, UZB – Uzbekistan, VCT – Saint Vincent and the Grenadines, VEN – Venezuela, VIR – Virgin Islands, U.S., VNM – Vietnam, VUT – Vanuatu, WSM – Samoa, YEM – Yemen, ZAF – South Africa, ZMB – Zambia, ZWE – Zimbabwe

eFigure 6o. Annual percent change of observed to expected (O:E) all-cause DALY rates in <20 years from 1990 to 2000 versus 2000 to 2017

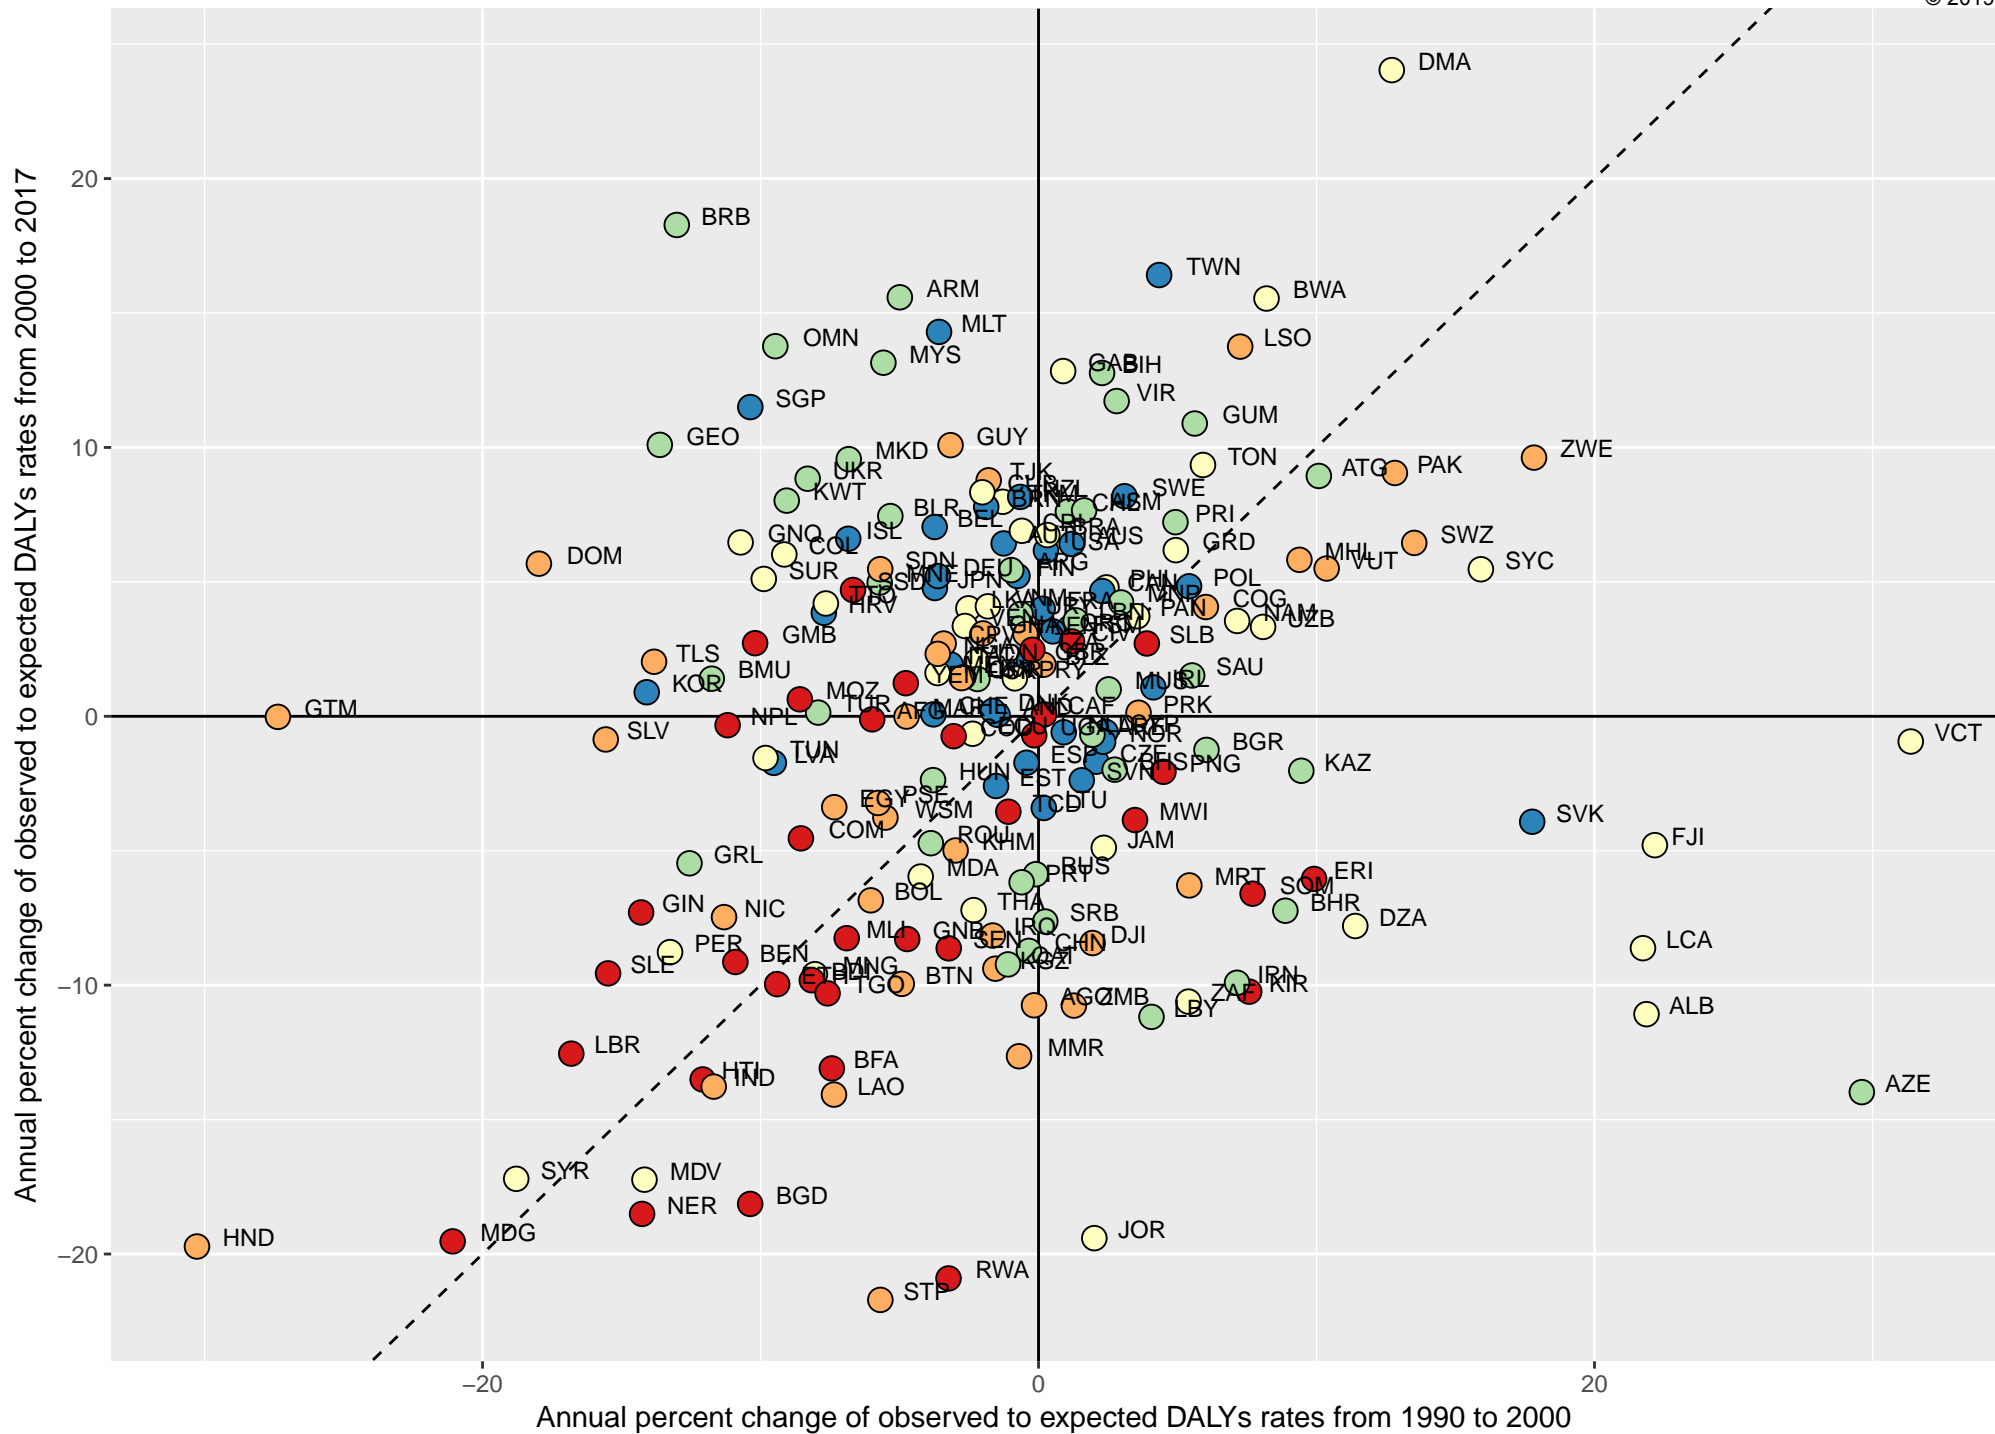

eFigure 6o. Annual percent change of observed to expected (O:E) all-cause DALY rates in <20 years from 1990 to 2000 versus 2000 to 2017 (graph subsetting to +/- 50%)

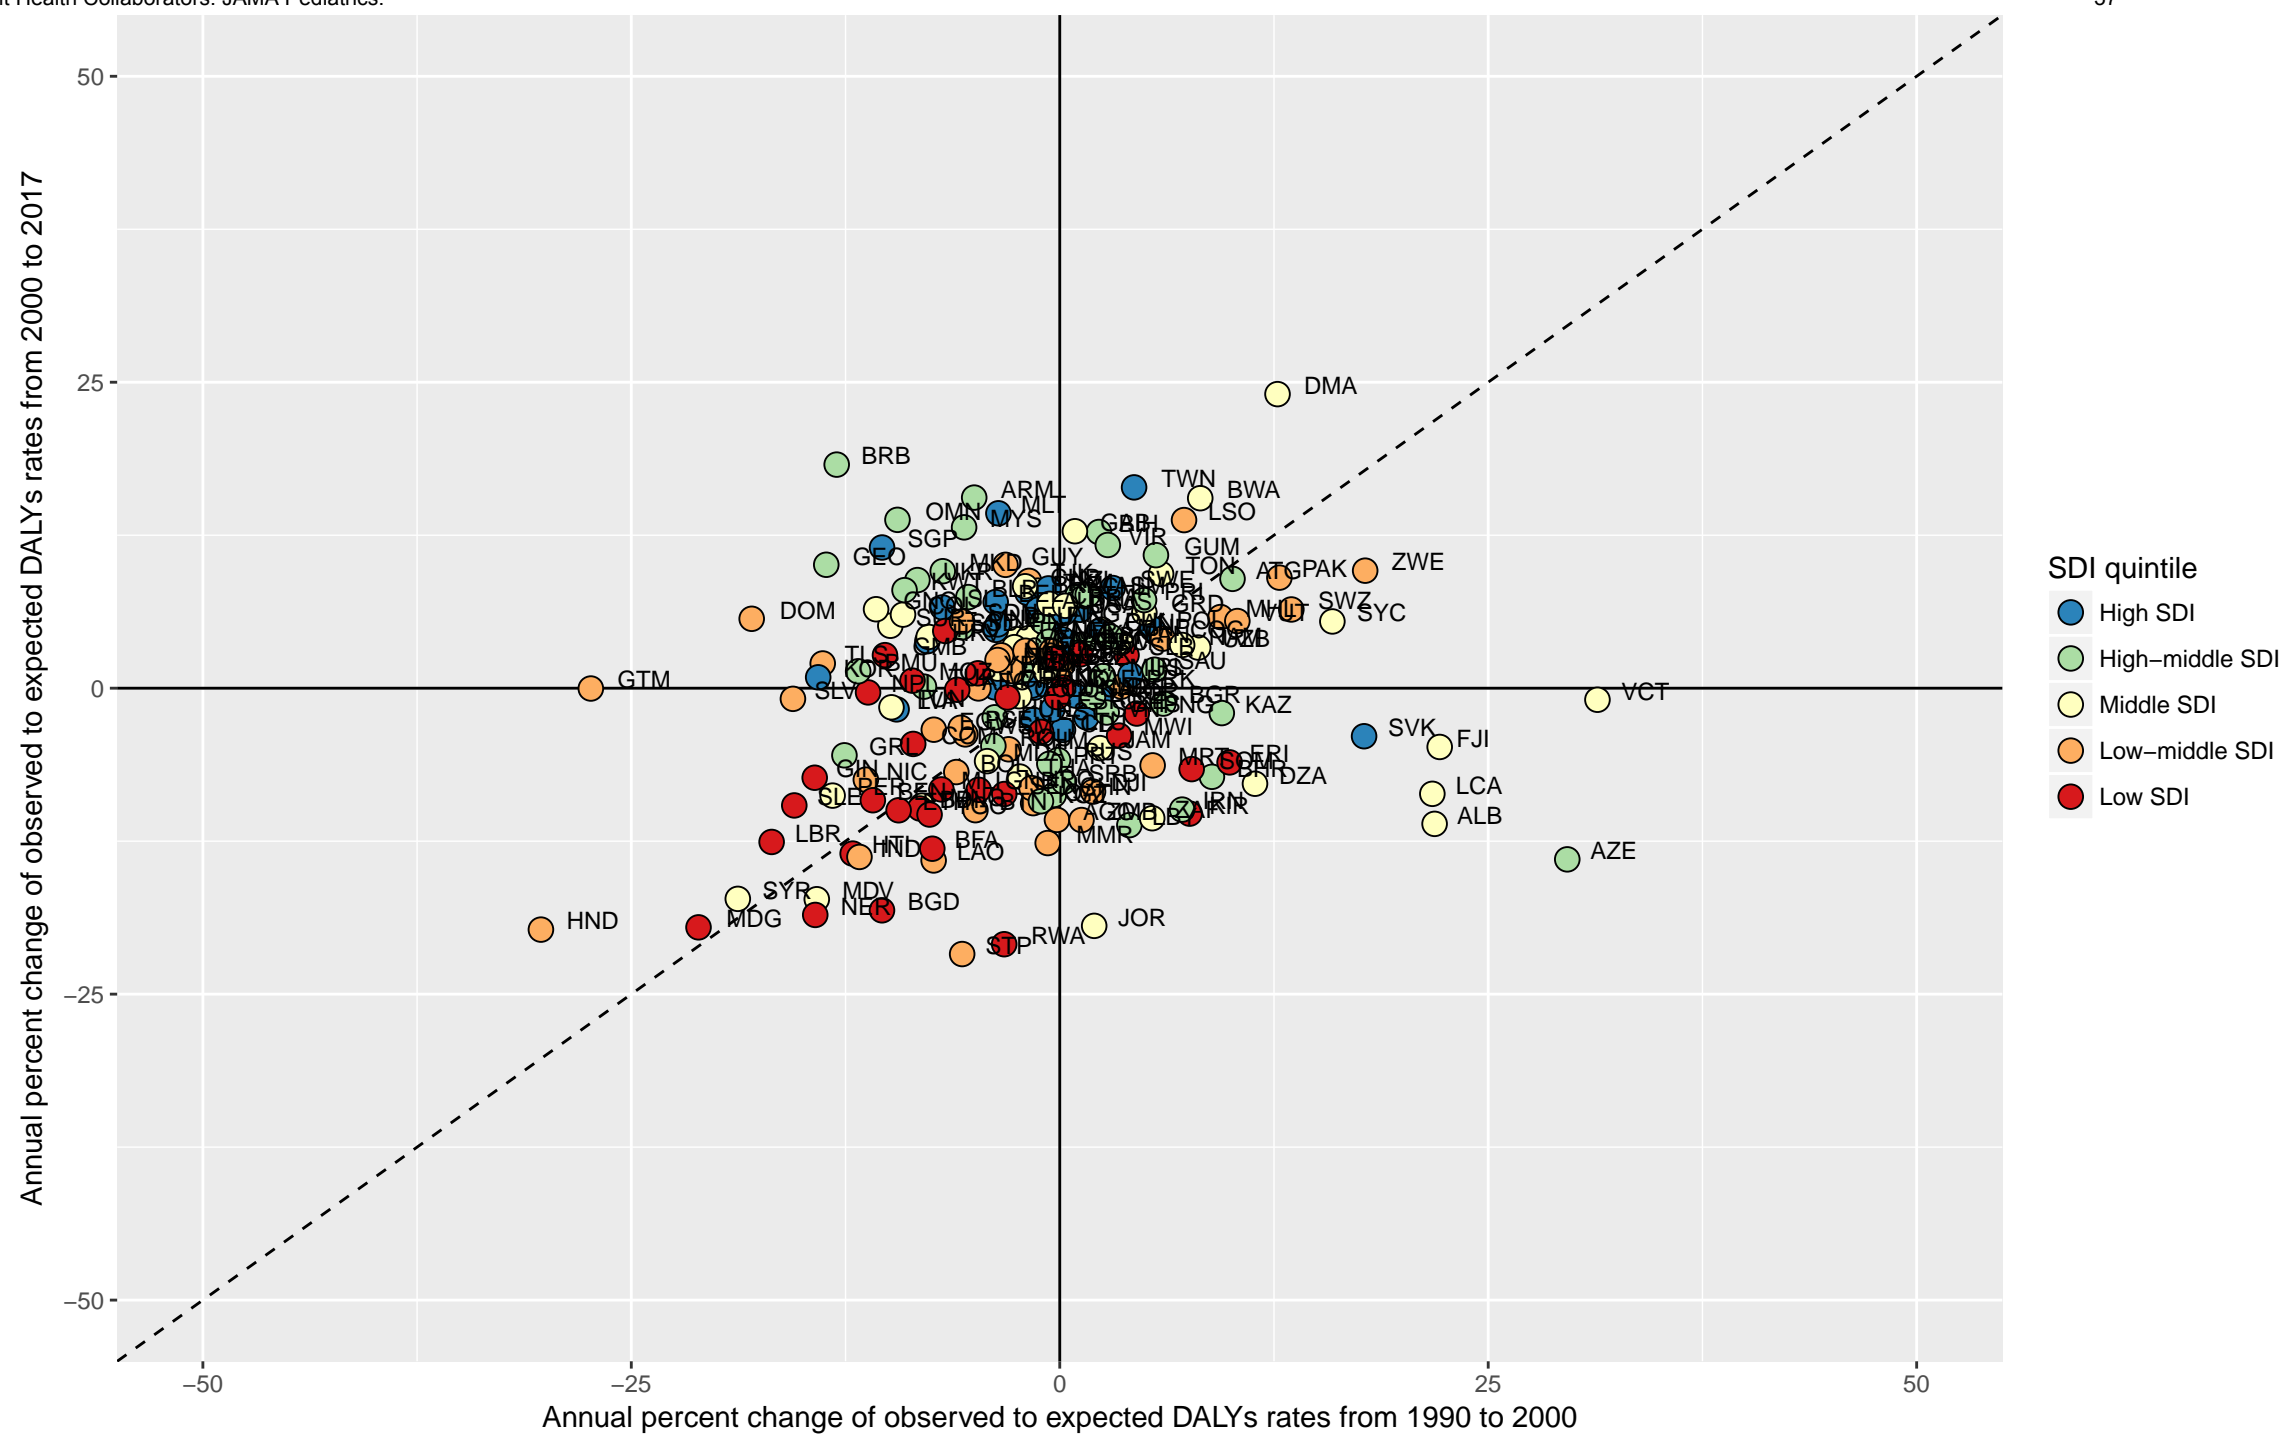

Annual percent change of observed versus expected (O:E) disability-adjusted life years (DALYs) rates by country for 1990 to 2000 versus 2000 to 2017 are plotted by country. In each pair of panels, the right panel focuses on changes within +/-50%. Panels a–d plot changes for all children and adolescents less than 20 years of age; panels e–h plot changes for children less than 1; panels i–l plot changes for children between 1 and 4; panels m–p plot changes for children between 5 and 9; and panels q–t plot changes for children between 10 and 19. For each age group, the first plot in the series is the all cause change in O:E rates (i.e., panels a, e, i, m, and q); the second plot in the series is the change in O:E rates associated with communicable, maternal, neonatal, and nutritional (CMNN) conditions (i.e., panels b, f, j, and r); the third plot in the series is the change in O:E rates associated with non-communicable diseases (NCDs – i.e., panels c, g, k, s); and the fourth plot in the series is the change in O:E rates associated with injuries (i.e., panels d, h, l, t). For each, countries in different socio-demographic index (SDI) quintiles are plotted with different countries. Abbreviations: DALY=disability-adjusted life year, AFG – Afghanistan, AGO – Angola, ALB – Albania, AND – Andorra, ARE – United Arab Emirates, ARG – Argentina, ARM – Armenia, ASM – American Samoa, ATG – Antigua and Barbuda, AUS – Australia, AUT – Austria, AZE – Azerbaijan, BDI – Burundi, BEL – Belgium, BEN – Benin, BFA – Burkina Faso, BGD – Bangladesh, BGR – Bulgaria, BHR – Bahrain, BHS – The Bahamas, BIH – Bosnia and Herzegovina, BLR – Belarus, BLZ – Belize, BMU – Bermuda, BOL – Bolivia, BRA – Brazil, BRB – Barbados, BRN – Brunei, BTN – Bhutan, BWA – Botswana, CAF – Central African Republic, CAN – Canada, CHE – Switzerland, CHL – Chile, CHN – China, CIV – Cote d'Ivoire, CMR – Cameroon, COD – Democratic Republic of the Congo, COG – Congo, COL – Colombia, COM – Comoros, CPV – Cape Verde, CRI – Costa Rica, CUB – Cuba, CYP – Cyprus, CZE – Czech Republic, DEU – Germany, DJI – Djibouti, DMA – Dominica, DNK – Denmark, DOM – Dominican Republic, DZA – Algeria, ECU – Ecuador, EGY – Egypt, ERI – Eritrea, ESP – Spain, EST – Estonia, ETH – Ethiopia, FIN – Finland, FJI – Fiji, FRA – France, FSM – Federated States of Micronesia, G – Global, GAB – Gabon, GBR – United Kingdom, GEO – Georgia, GHA – Ghana, GIN – Guinea, GMB – The Gambia, GNB – Guinea-Bissau, GNQ – Equatorial Guinea, GRC – Greece, GRD – Grenada, GRL – Greenland, GTM – Guatemala, GUM – Guam, GUY – Guyana, HND – Honduras, HRV – Croatia, HTI – Haiti, HUN – Hungary, IDN – Indonesia, IND – India, IRL – Ireland, IRN – Iran, IRQ – Iraq, ISL – Iceland, ISR – Israel, ITA – Italy, JAM – Jamaica, JOR – Jordan, JPN – Japan, KAZ – Kazakhstan, KEN – Kenya, KGZ – Kyrgyzstan, KHM – Cambodia, KIR – Kiribati, KOR – South Korea, KWT – Kuwait, LAO – Laos, LBN – Lebanon, LBR – Liberia, LBY – Libya, LCA – Saint Lucia, LKA – Sri Lanka, LSO – Lesotho, LTU – Lithuania, LUX – Luxembourg, LVA – Latvia, MAR – Morocco, MDA – Moldova, MDG – Madagascar, MDV – Maldives, MEX – Mexico, MHL – Marshall Islands, MKD – Macedonia, MLI – Mali, MLT – Malta, MMR – Myanmar, MNE – Montenegro, MNG – Mongolia, MNP – Northern Mariana Islands, MOZ – Mozambique, MRT – Mauritania, MUS – Mauritius, MWI – Malawi, MYS – Malaysia, NAM – Namibia, NER – Niger, NGA – Nigeria, NIC – Nicaragua, NLD – Netherlands, NOR – Norway, NPL – Nepal, NZL – New Zealand, OMN – Oman, PAK – Pakistan, PAN – Panama, PER – Peru, PHL – Philippines, PNG – Papua New Guinea, POL – Poland, PRI – Puerto Rico, PRK – North Korea, PRT – Portugal, PRY – Paraguay, PSE – Palestine, QAT – Qatar, ROU – Romania, RUS – Russian Federation, RWA – Rwanda, SAU – Saudi Arabia, SDN – Sudan, SEN – Senegal, SGP – Singapore, SLB – Solomon Islands, SLE – Sierra Leone, SLV – El Salvador, SOM – Somalia, SRB – Serbia, SSD – South Sudan, STP – Sao Tome and Principe, SUR – Suriname, SVK – Slovakia, SVN – Slovenia, SWE – Sweden, SWZ – Swaziland, SYC – Seychelles, SYR – Syria, TCD – Chad, TGO – Togo, THA – Thailand, TJK – Tajikistan, TKM – Turkmenistan, TLS – Timor-Leste, TON – Tonga, TTO – Trinidad and Tobago, TUN – Tunisia, TUR – Turkey, TWN – Taiwan, TZA – Tanzania, UGA – Uganda, UKR – Ukraine, URY – Uruguay, USA – United States, UZB – Uzbekistan, VCT – Saint Vincent and the Grenadines, VEN – Venezuela, VIR – Virgin Islands, U.S., VNM – Vietnam, VUT – Vanuatu, WSM – Samoa, YEM – Yemen, ZAF – South Africa, ZMB – Zambia, ZWE – Zimbabwe

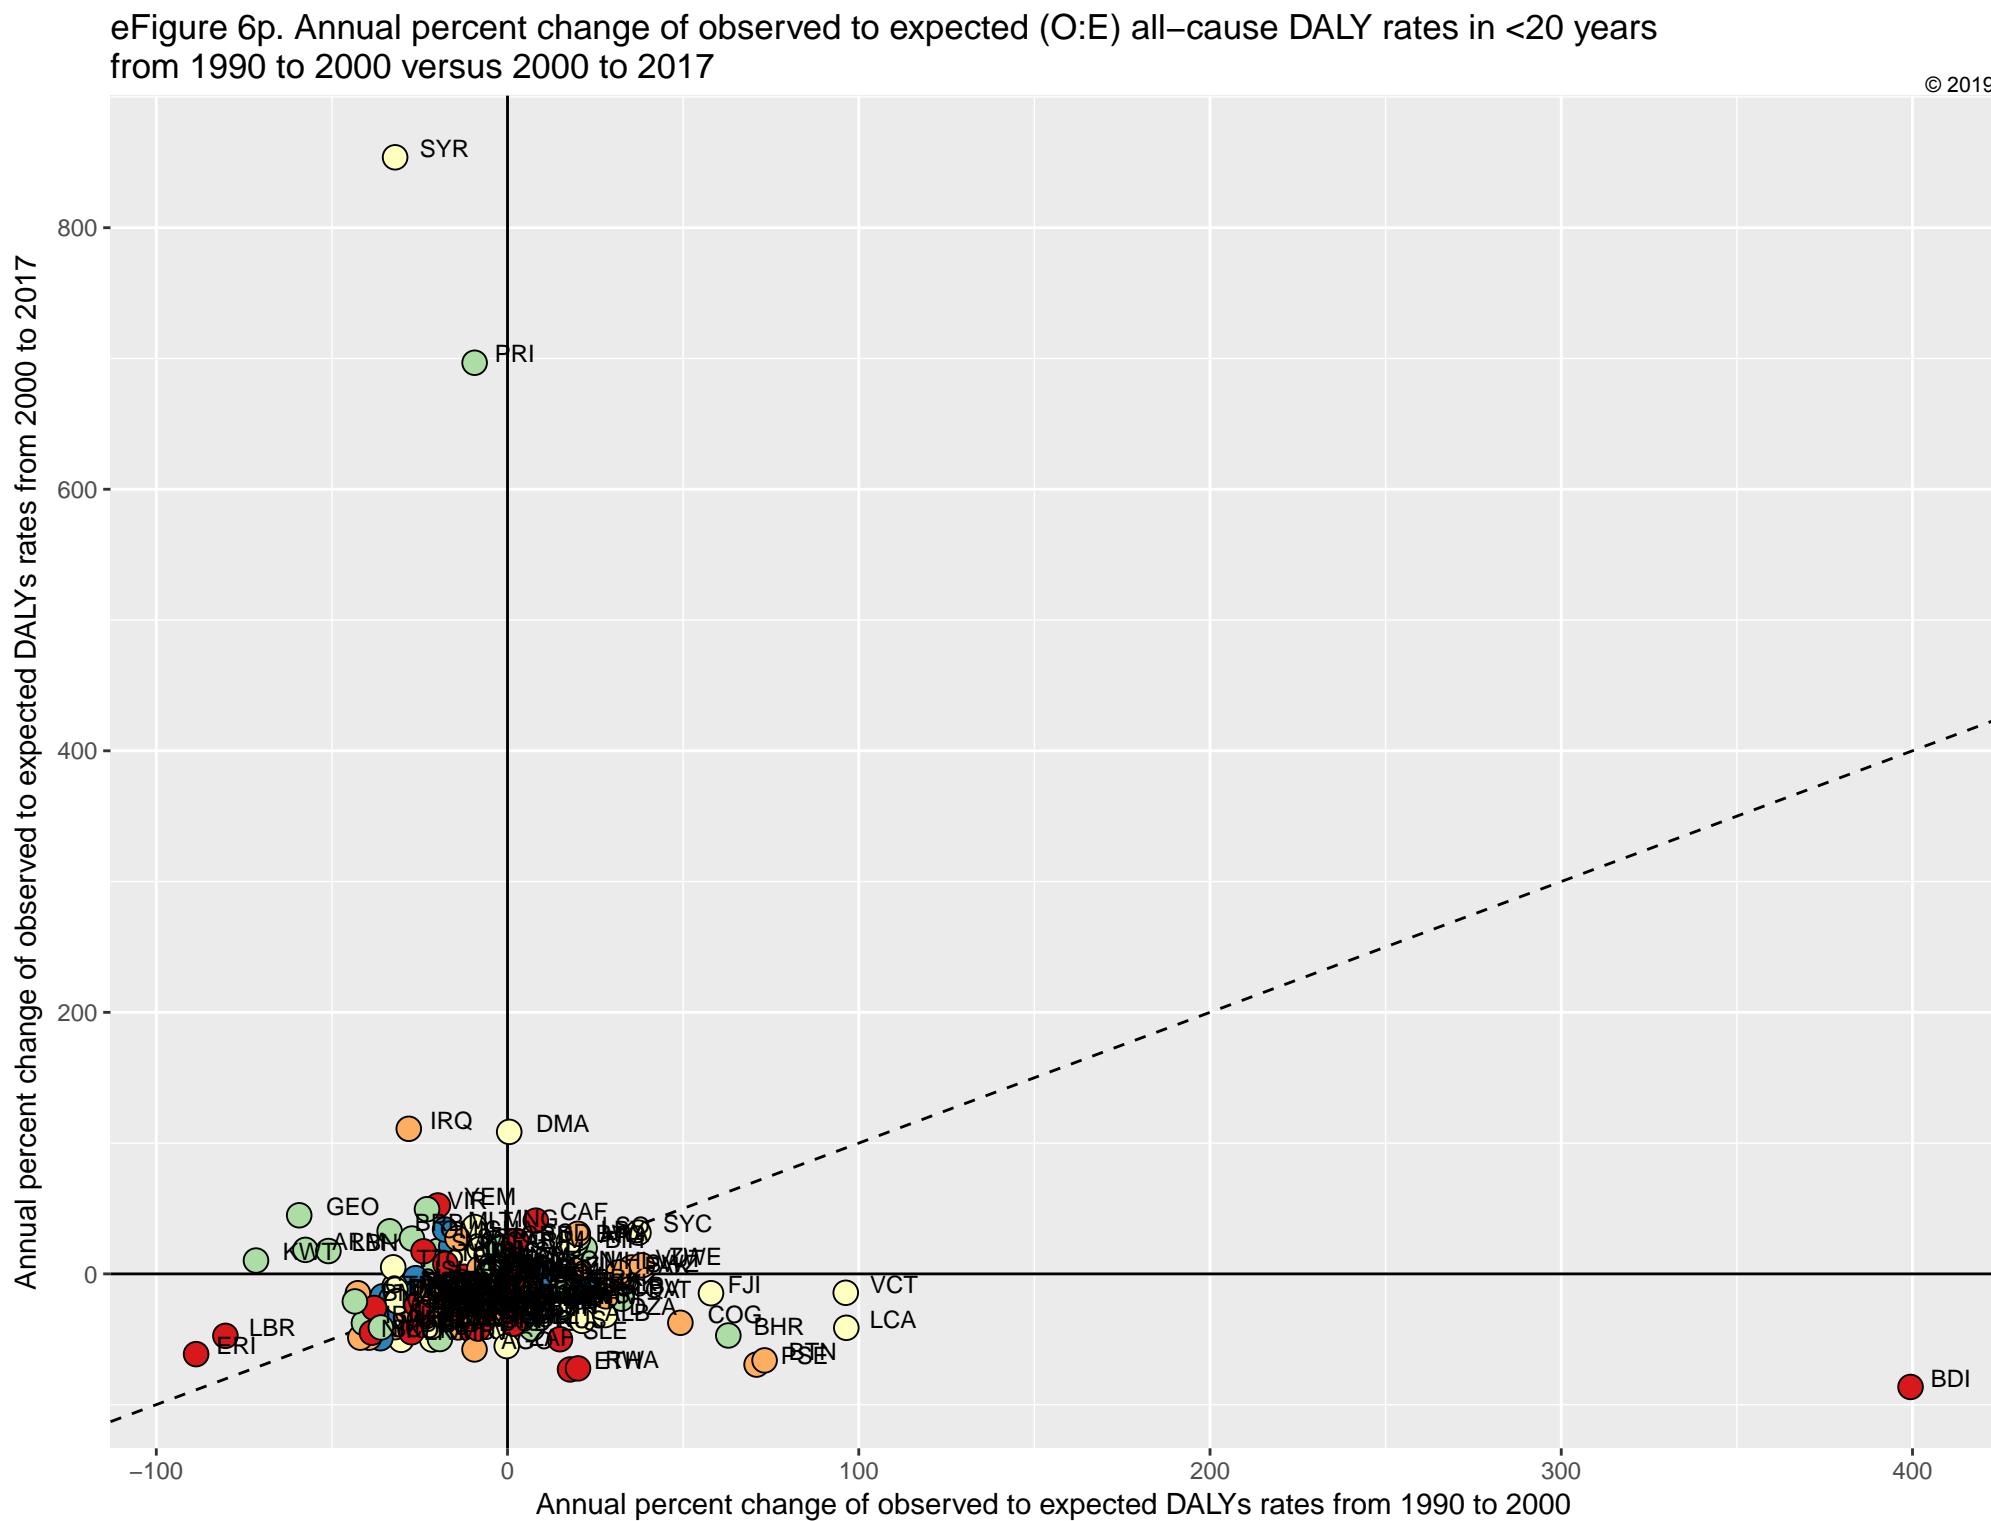

© 2019 GBD 2017 Child and Adolescent Health Collaborators. JAMA Pediatrics.

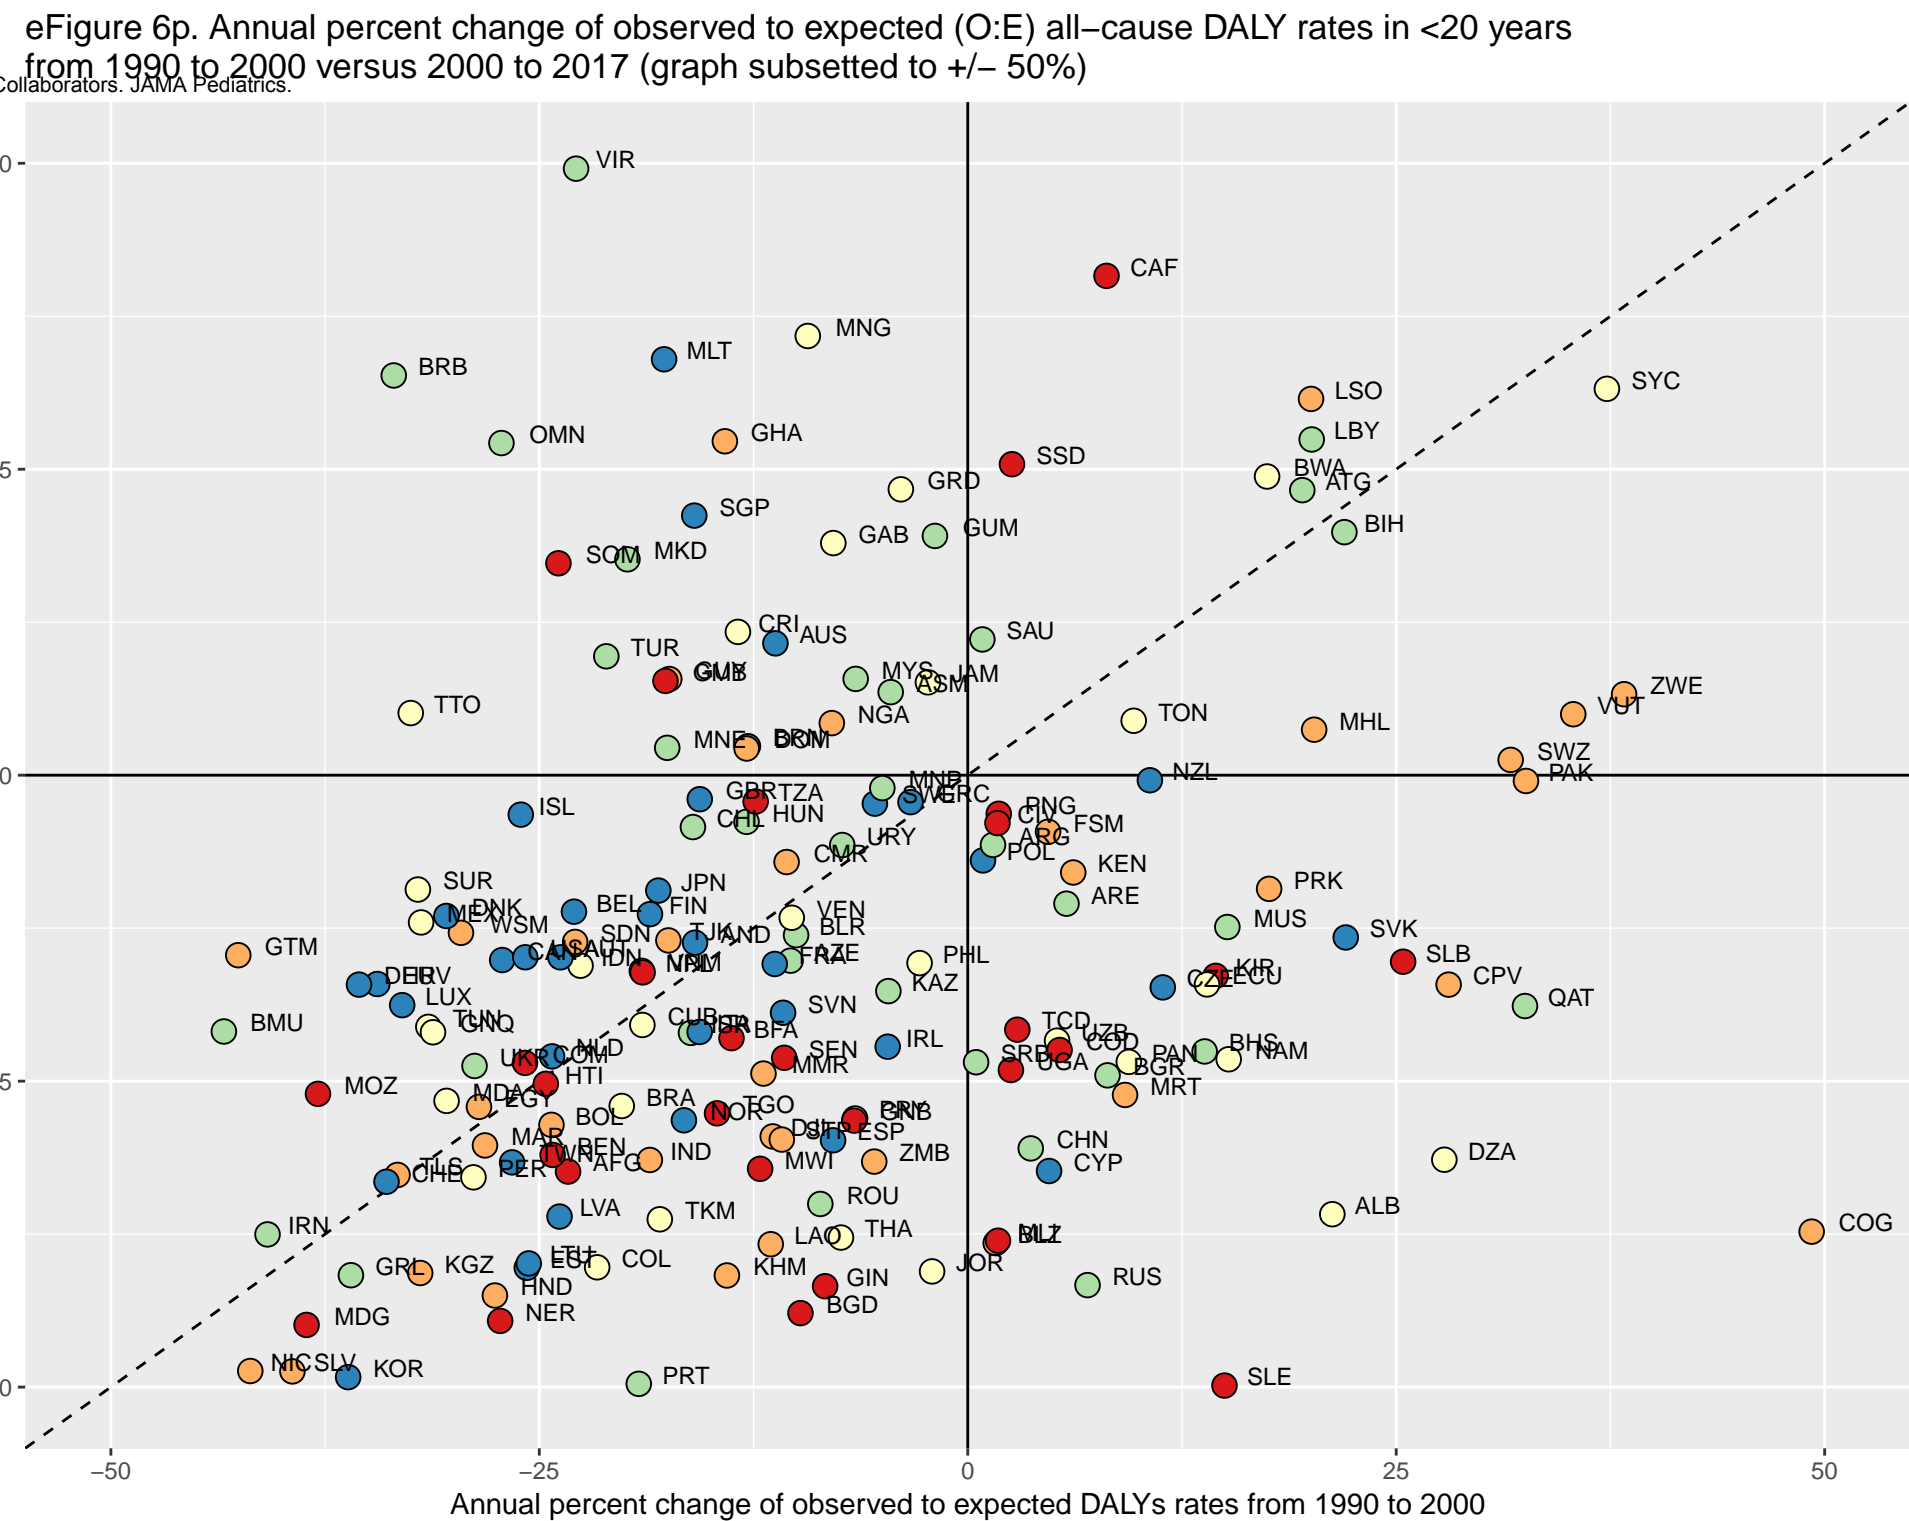

38

Annual percent change of observed versus expected (O:E) disability-adjusted life years (DALYs) rates by country for 1990 to 2000 versus 2000 to 2017 are plotted by country. In each pair of panels, the right panel focuses on changes within  $\pm 50\%$ . Panels a–d plot changes for all children and adolescents less than 20 years of age; panels e–h plot changes for children less than 1; panels i–l plot changes for children between 1 and 4; panels m–p plot changes for children between 5 and 9; and panels q–t plot changes for children between 10 and 19. For each age group, the first plot in the series is the all cause change in O:E rates (i.e., panels a, e, i, m, and q); the second plot in the series is the change in O:E rates associated with communicable, maternal, neonatal, and nutritional (CMNN) conditions (i.e., panels b, f, j, and r); the third plot in the series is the change in O:E rates associated with non-communicable diseases (NCDs – i.e., panels c, g, k, s); and the fourth plot in the series is the change in O:E rates associated with injuries (i.e., panels d, h, l, t). For each, countries in different socio-demographic index (SDI) quintiles are plotted with different countries. Abbreviations: DALY=disability-adjusted life year, AFG – Afghanistan, AGO – Angola, ALB – Albania, AND – Andorra, ARE – United Arab Emirates, ARG – Argentina, ARM – Armenia, ASM – American Samoa, ATG – Antigua and Barbuda, AUS – Australia, AUT – Austria, AZE – Azerbaijan, BDI – Burundi, BEL – Belgium, BEN – Benin, BFA – Burkina Faso, BGD – Bangladesh, BGR – Bulgaria, BHR – Bahrain, BHS – The Bahamas, BIH – Bosnia and Herzegovina, BLR – Belarus, BLZ – Belize, BMU – Bermuda, BOL – Bolivia, BRA – Brazil, BRB – Barbados, BRN – Brunei, BTN – Bhutan, BWA – Botswana, CAF – Central African Republic, CAN – Canada, CHE – Switzerland, CHL – Chile, CHN – China, CIV – Cote d'Ivoire, CMR – Cameroon, COD – Democratic Republic of the Congo, COG – Congo, COL – Colombia, COM – Comoros, CPV – Cape Verde, CRI – Costa Rica, CUB – Cuba, CYP – Cyprus, CZE – Czech Republic, DEU – Germany, DJI – Djibouti, DMA – Dominica, DNK – Denmark, DOM – Dominican Republic, DZA – Algeria, ECU – Ecuador, EGY – Egypt, ERI – Eritrea, ESP – Spain, EST – Estonia, ETH – Ethiopia, FIN – Finland, FJI – Fiji, FRA – France, FSM – Federated States of Micronesia, G – Global, GAB – Gabon, GBR – United Kingdom, GEO – Georgia, GHA – Ghana, GIN – Guinea, GMB – The Gambia, GNB – Guinea-Bissau, GNQ – Equatorial Guinea, GRC – Greece, GRD – Grenada, GRL – Greenland, GTM – Guatemala, GUM – Guam, GUY – Guyana, HND – Honduras, HRV – Croatia, HTI – Haiti, HUN – Hungary, IDN – Indonesia, IND – India, IRL – Ireland, IRN – Iran, IRQ – Iraq, ISL – Iceland, ISR – Israel, ITA – Italy, JAM – Jamaica, JOR – Jordan, JPN – Japan, KAZ – Kazakhstan, KEN – Kenya, KGZ – Kyrgyzstan, KHM – Cambodia, KIR – Kiribati, KOR – South Korea, KWT – Kuwait, LAO – Laos, LBN – Lebanon, LBR – Liberia, LBY – Libya, LCA – Saint Lucia, LKA – Sri Lanka, LSO – Lesotho, LTU – Lithuania, LUX – Luxembourg, LVA – Latvia, MAR – Morocco, MDA – Moldova, MDG – Madagascar, MDV – Maldives, MEX – Mexico, MHL – Marshall Islands, MKD – Macedonia, MLI – Mali, MLT – Malta, MMR – Myanmar, MNE – Montenegro, MNG – Mongolia, MNP – Northern Mariana Islands, MOZ – Mozambique, MRT – Mauritania, MUS – Mauritius, MWI – Malawi, MYS – Malaysia, NAM – Namibia, NER – Niger, NGA – Nigeria, NIC – Nicaragua, NLD – Netherlands, NOR – Norway, NPL – Nepal, NZL – New Zealand, OMN – Oman, PAK – Pakistan, PAN – Panama, PER – Peru, PHL – Philippines, PNG – Papua New Guinea, POL – Poland, PRI – Puerto Rico, PRK – North Korea, PRT – Portugal, PRY – Paraguay, PSE – Palestine, QAT – Qatar, ROU – Romania, RUS – Russian Federation, RWA – Rwanda, SAU – Saudi Arabia, SDN – Sudan, SEN – Senegal, SGP – Singapore, SLB – Solomon Islands, SLE – Sierra Leone, SLV – El Salvador, SOM – Somalia, SRB – Serbia, SSD – South Sudan, STP – Sao Tome and Principe, SUR – Suriname, SVK – Slovakia, SVN – Slovenia, SWE – Sweden, SWZ – Swaziland, SYC – Seychelles, SYR – Syria, TCD – Chad, TGO – Togo, THA – Thailand, TJK – Tajikistan, TKM – Turkmenistan, TLS – Timor-Leste, TON – Tonga, TTO – Trinidad and Tobago, TUN – Tunisia, TUR – Turkey, TWN – Taiwan, TZA – Tanzania, UGA – Uganda, UKR – Ukraine, URY – Uruguay, USA – United States, UZB – Uzbekistan, VCT – Saint Vincent and the Grenadines, VEN – Venezuela, VIR – Virgin Islands, U.S., VNM – Vietnam, VUT – Vanuatu, WSM – Samoa, YEM – Yemen, ZAF – South Africa, ZMB – Zambia, ZWE – Zimbabwe

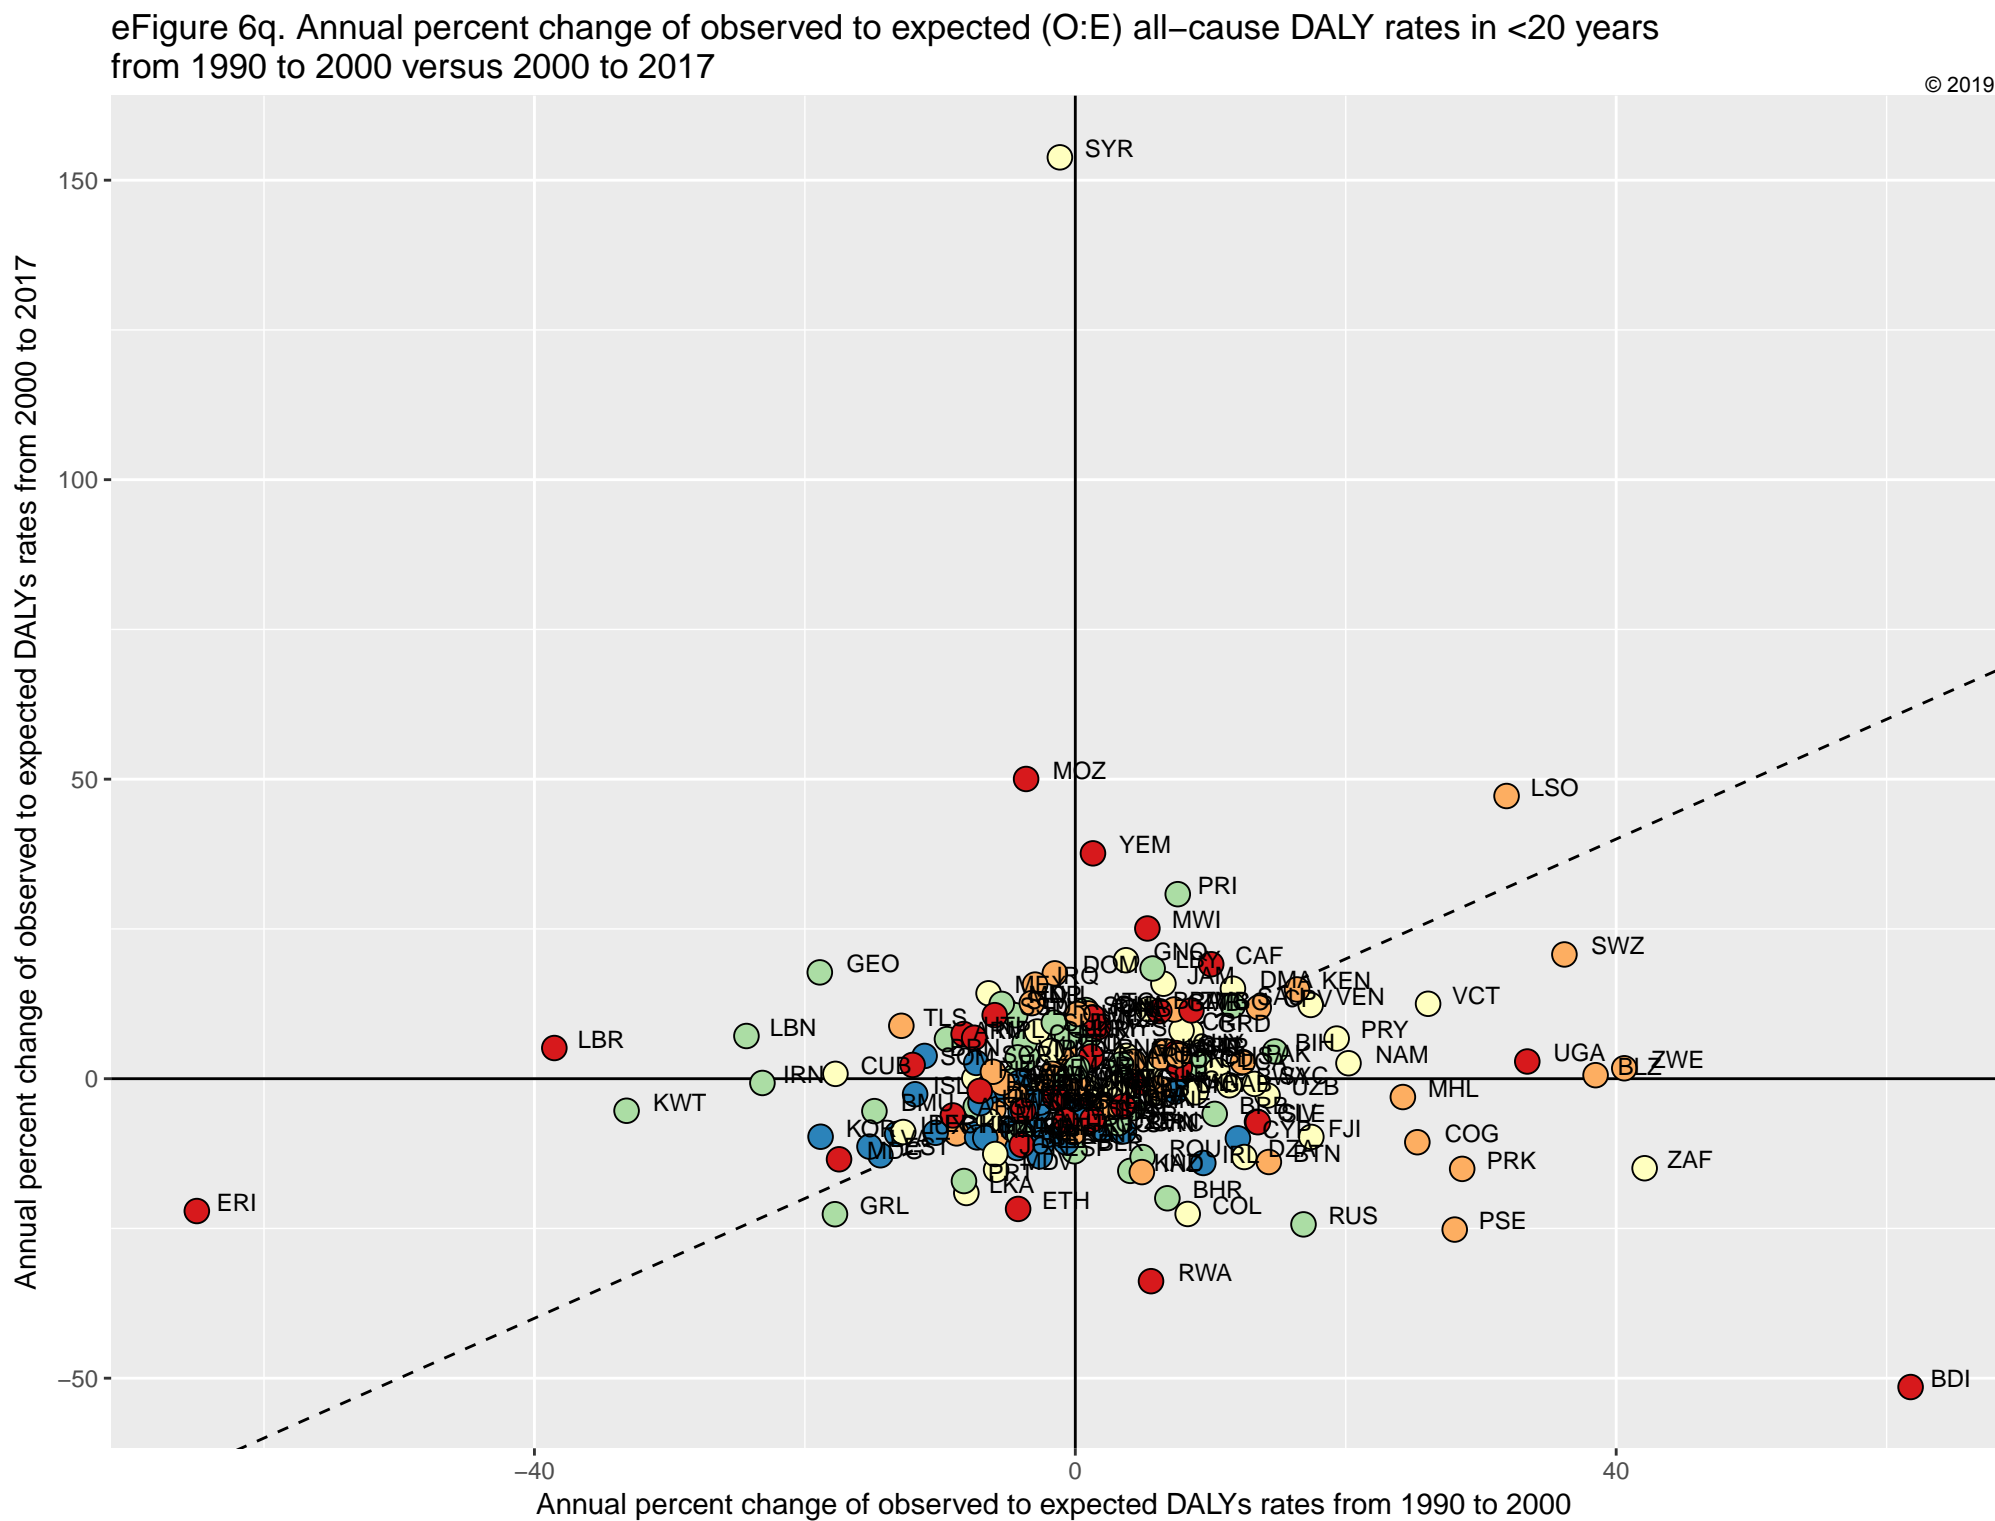

© 2019 GBD 2017 Child and Adolescent Health Collaborators. JAMA Pediatrics.

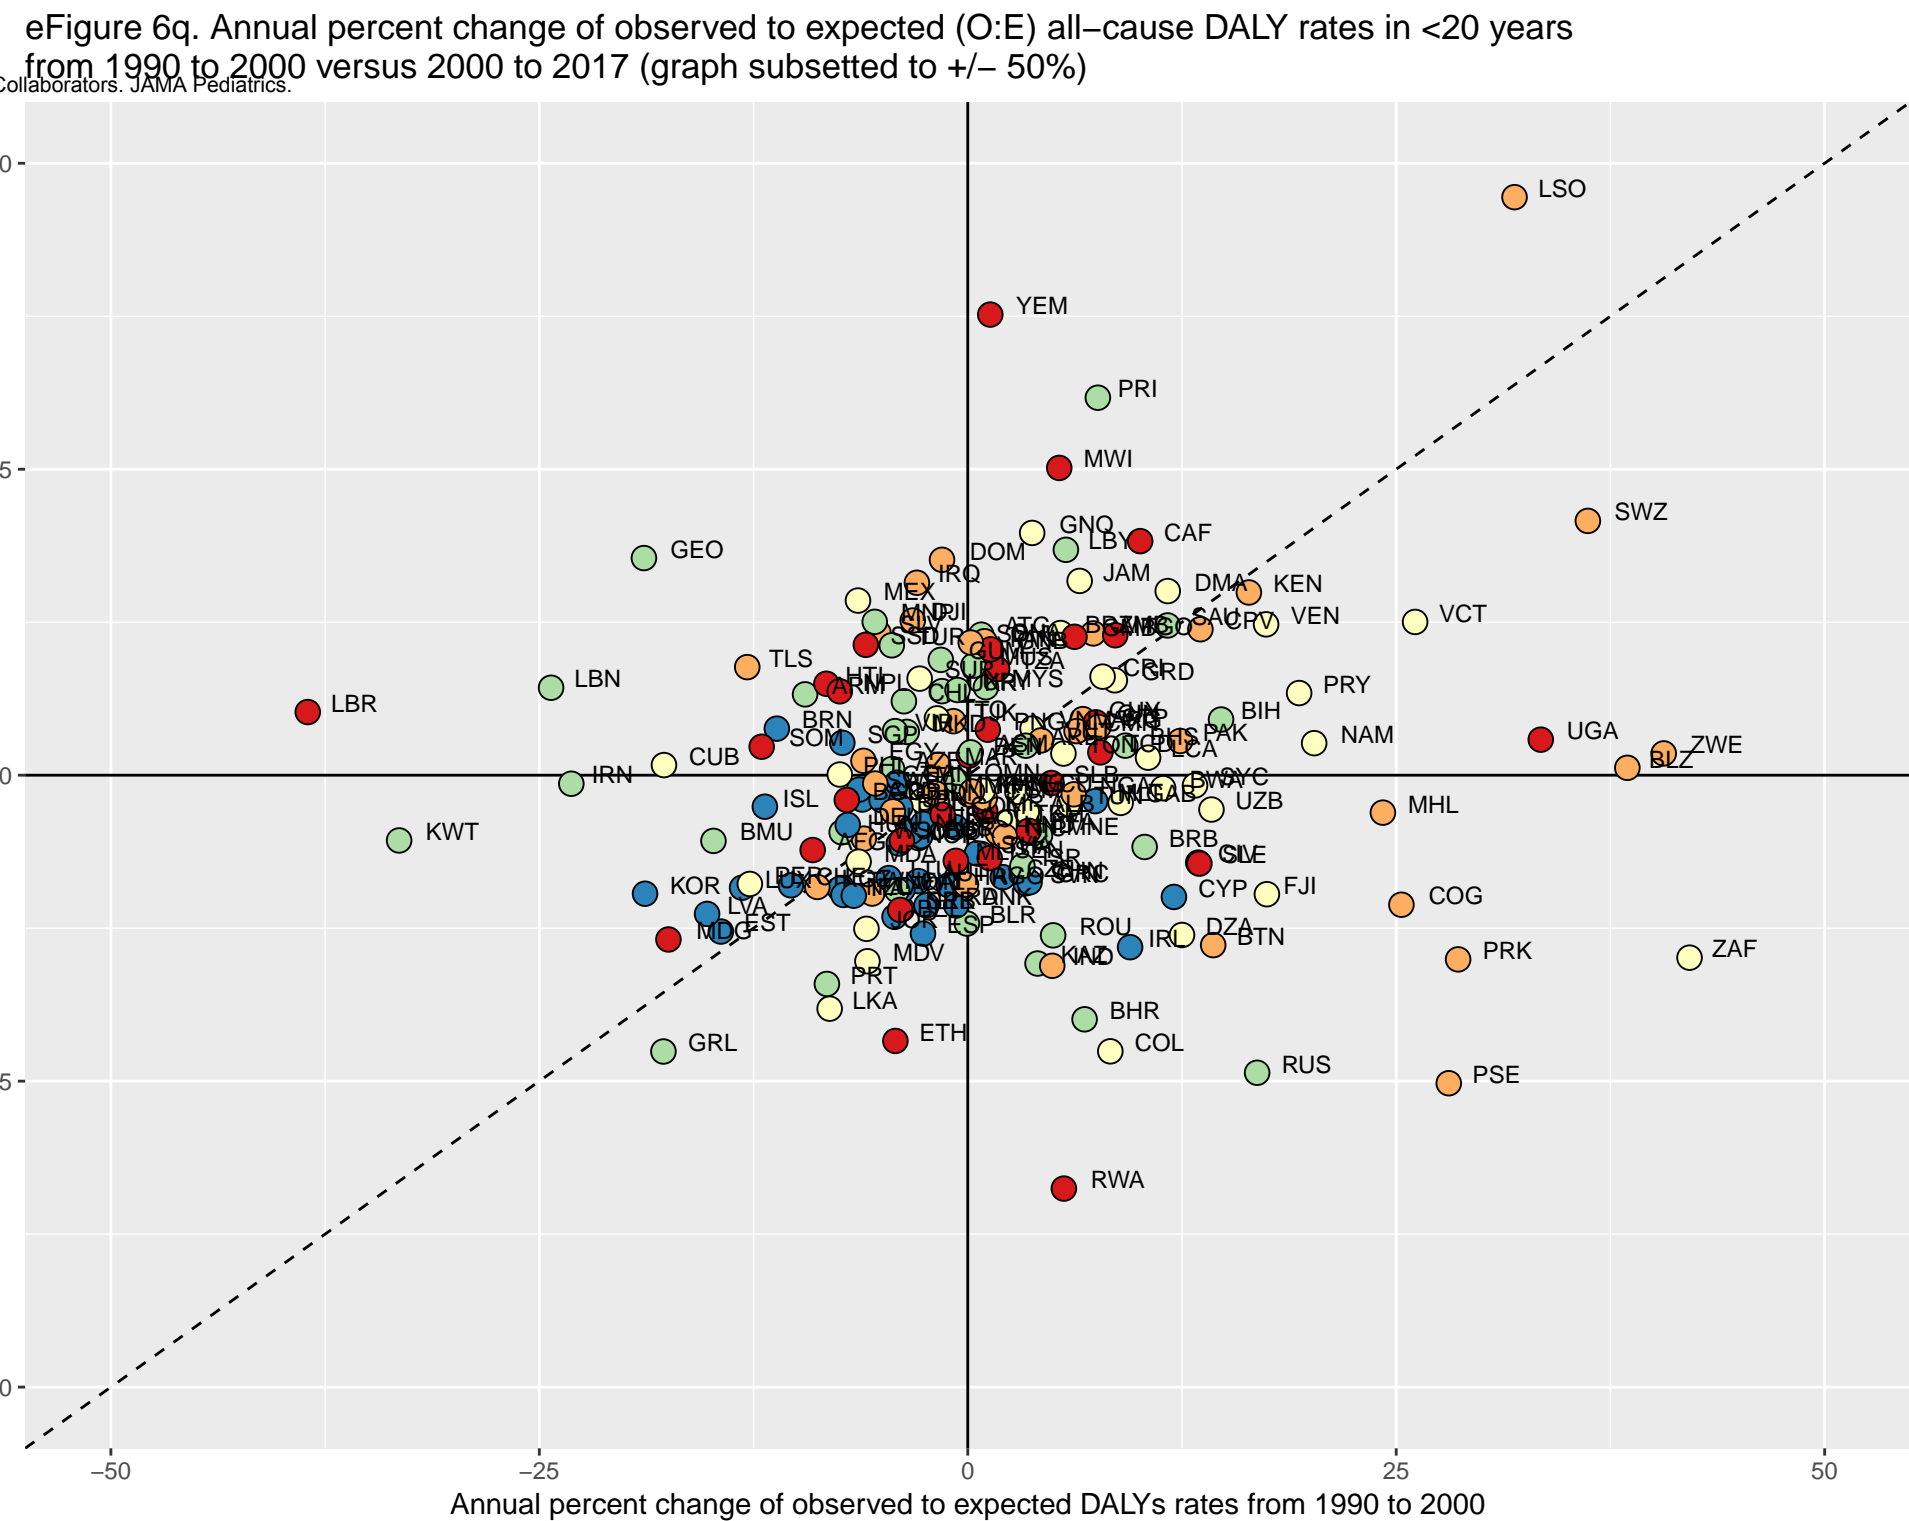

39

Annual percent change of observed versus expected (O:E) disability-adjusted life years (DALYs) rates by country for 1990 to 2000 versus 2000 to 2017 are plotted by country. In each pair of panels, the right panel focuses on changes within  $\pm 50\%$ . Panels a–d plot changes for all children and adolescents less than 20 years of age; panels e–h plot changes for children less than 1; panels i–l plot changes for children between 1 and 4; panels m–p plot changes for children between 5 and 9; and panels q–t plot changes for children between 10 and 19. For each age group, the first plot in the series is the all cause change in O:E rates (i.e., panels a, e, i, m, and q); the second plot in the series is the change in O:E rates associated with communicable, maternal, neonatal, and nutritional (CMNN) conditions (i.e., panels b, f, j, and r); the third plot in the series is the change in O:E rates associated with non-communicable diseases (NCDs – i.e., panels c, g, k, s); and the fourth plot in the series is the change in O:E rates associated with injuries (i.e., panels d, h, l, t). For each, countries in different socio-demographic index (SDI) quintiles are plotted with different countries. Abbreviations: DALY=disability-adjusted life year, AFG – Afghanistan, AGO – Angola, ALB – Albania, AND – Andorra, ARE – United Arab Emirates, ARG – Argentina, ARM – Armenia, ASM – American Samoa, ATG – Antigua and Barbuda, AUS – Australia, AUT – Austria, AZE – Azerbaijan, BDI – Burundi, BEL – Belgium, BEN – Benin, BFA – Burkina Faso, BGD – Bangladesh, BGR – Bulgaria, BHR – Bahrain, BHS – The Bahamas, BIH – Bosnia and Herzegovina, BLR – Belarus, BLZ – Belize, BMU – Bermuda, BOL – Bolivia, BRA – Brazil, BRB – Barbados, BRN – Brunei, BTN – Bhutan, BWA – Botswana, CAF – Central African Republic, CAN – Canada, CHE – Switzerland, CHL – Chile, CHN – China, CIV – Cote d'Ivoire, CMR – Cameroon, COD – Democratic Republic of the Congo, COG – Congo, COL – Colombia, COM – Comoros, CPV – Cape Verde, CRI – Costa Rica, CUB – Cuba, CYP – Cyprus, CZE – Czech Republic, DEU – Germany, DJI – Djibouti, DMA – Dominica, DNK – Denmark, DOM – Dominican Republic, DZA – Algeria, ECU – Ecuador, EGY – Egypt, ERI – Eritrea, ESP – Spain, EST – Estonia, ETH – Ethiopia, FIN – Finland, FJI – Fiji, FRA – France, FSM – Federated States of Micronesia, G – Global, GAB – Gabon, GBR – United Kingdom, GEO – Georgia, GHA – Ghana, GIN – Guinea, GMB – The Gambia, GNB – Guinea-Bissau, GNQ – Equatorial Guinea, GRC – Greece, GRD – Grenada, GRL – Greenland, GTM – Guatemala, GUM – Guam, GUY – Guyana, HND – Honduras, HRV – Croatia, HTI – Haiti, HUN – Hungary, IDN – Indonesia, IND – India, IRL – Ireland, IRN – Iran, IRQ – Iraq, ISL – Iceland, ISR – Israel, ITA – Italy, JAM – Jamaica, JOR – Jordan, JPN – Japan, KAZ – Kazakhstan, KEN – Kenya, KGZ – Kyrgyzstan, KHM – Cambodia, KIR – Kiribati, KOR – South Korea, KWT – Kuwait, LAO – Laos, LBN – Lebanon, LBR – Liberia, LBY – Libya, LCA – Saint Lucia, LKA – Sri Lanka, LSO – Lesotho, LTU – Lithuania, LUX – Luxembourg, LVA – Latvia, MAR – Morocco, MDA – Moldova, MDG – Madagascar, MDV – Maldives, MEX – Mexico, MHL – Marshall Islands, MKD – Macedonia, MLI – Mali, MLT – Malta, MMR – Myanmar, MNE – Montenegro, MNG – Mongolia, MNP – Northern Mariana Islands, MOZ – Mozambique, MRT – Mauritania, MUS – Mauritius, MWI – Malawi, MYS – Malaysia, NAM – Namibia, NER – Niger, NGA – Nigeria, NIC – Nicaragua, NLD – Netherlands, NOR – Norway, NPL – Nepal, NZL – New Zealand, OMN – Oman, PAK – Pakistan, PAN – Panama, PER – Peru, PHL – Philippines, PNG – Papua New Guinea, POL – Poland, PRI – Puerto Rico, PRK – North Korea, PRT – Portugal, PRY – Paraguay, PSE – Palestine, QAT – Qatar, ROU – Romania, RUS – Russian Federation, RWA – Rwanda, SAU – Saudi Arabia, SDN – Sudan, SEN – Senegal, SGP – Singapore, SLB – Solomon Islands, SLE – Sierra Leone, SLV – El Salvador, SOM – Somalia, SRB – Serbia, SSD – South Sudan, STP – Sao Tome and Principe, SUR – Suriname, SVK – Slovakia, SVN – Slovenia, SWE – Sweden, SWZ – Swaziland, SYC – Seychelles, SYR – Syria, TCD – Chad, TGO – Togo, THA – Thailand, TJK – Tajikistan, TKM – Turkmenistan, TLS – Timor-Leste, TON – Tonga, TTO – Trinidad and Tobago, TUN – Tunisia, TUR – Turkey, TWN – Taiwan, TZA – Tanzania, UGA – Uganda, UKR – Ukraine, URY – Uruguay, USA – United States, UZB – Uzbekistan, VCT – Saint Vincent and the Grenadines, VEN – Venezuela, VIR – Virgin Islands, U.S., VNM – Vietnam, VUT – Vanuatu, WSM – Samoa, YEM – Yemen, ZAF – South Africa, ZMB – Zambia, ZWE – Zimbabwe

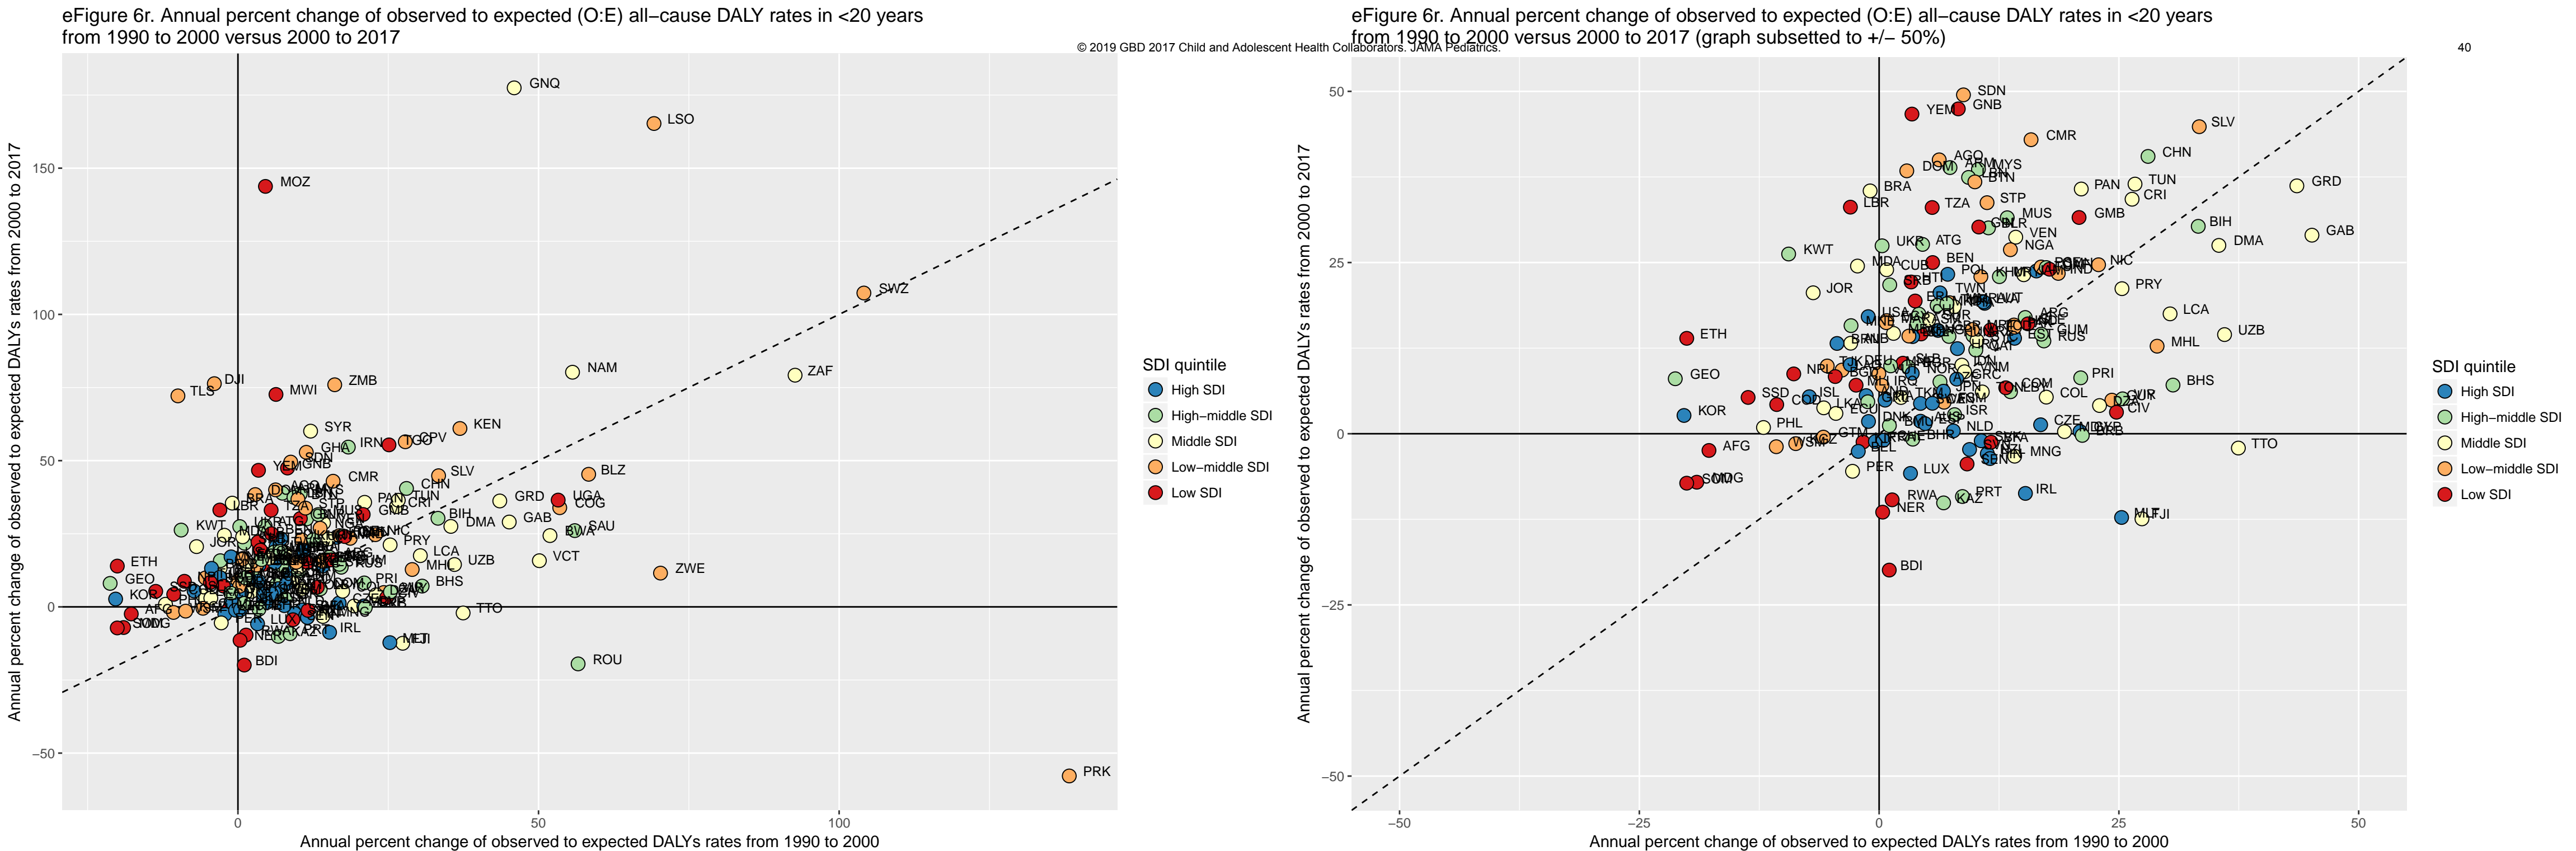

Annual percent change of observed versus expected (O:E) disability-adjusted life years (DALYs) rates by country for 1990 to 2000 versus 2000 to 2017 are plotted by country. In each pair of panels, the right panel focuses on changes within +/-50%. Panels a–d plot changes for all children and adolescents less than 20 years of age; panels e–h plot changes for children less than 1; panels i–l plot changes for children between 1 and 4; panels m–p plot changes for children between 5 and 9; and panels q–t plot changes for children between 10 and 19. For each age group, the first plot in the series is the all cause change in O:E rates (i.e., panels a, e, i, m, and q); the second plot in the series is the change in O:E rates associated with communicable, maternal, neonatal, and nutritional (CMNN) conditions (i.e., panels b, f, j, and r); the third plot in the series is the change in O:E rates associated with non-communicable diseases (NCDs – i.e., panels c, g, k, s); and the fourth plot in the series is the change in O:E rates associated with injuries (i.e., panels d, h, l, t). For each, countries in different socio-demographic index (SDI) quintiles are plotted with different countries. Abbreviations: DALY=disability-adjusted life year, AFG – Afghanistan, AGO – Angola, ALB – Albania, AND – Andorra, ARE – United Arab Emirates, ARG – Argentina, ARM – Armenia, ASM – American Samoa, ATG – Antigua and Barbuda, AUS – Australia, AUT – Austria, AZE – Azerbaijan, BDI – Burundi, BEL – Belgium, BEN – Benin, BFA – Burkina Faso, BGD – Bangladesh, BGR – Bulgaria, BHR – Bahrain, BHS – The Bahamas, BIH – Bosnia and Herzegovina, BLR – Belarus, BLZ – Belize, BMU – Bermuda, BOL – Bolivia, BRA – Brazil, BRB – Barbados, BRN – Brunei, BTN – Bhutan, BWA – Botswana, CAF – Central African Republic, CAN – Canada, CHE – Switzerland, CHL – Chile, CHN – China, CIV – Cote d'Ivoire, CMR – Cameroon, COD – Democratic Republic of the Congo, COG – Congo, COL – Colombia, COM – Comoros, CPV – Cape Verde, CRI – Costa Rica, CUB – Cuba, CYP – Cyprus, CZE – Czech Republic, DEU – Germany, DJI – Djibouti, DMA – Dominica, DNK – Denmark, DOM – Dominican Republic, DZA – Algeria, ECU – Ecuador, EGY – Egypt, ERI – Eritrea, ESP – Spain, EST – Estonia, ETH – Ethiopia, FIN – Finland, FJI – Fiji, FRA – France, FSM – Federated States of Micronesia, G – Global, GAB – Gabon, GBR – United Kingdom, GEO – Georgia, GHA – Ghana, GIN – Guinea, GMB – The Gambia, GNB – Guinea-Bissau, GNQ – Equatorial Guinea, GRC – Greece, GRD – Grenada, GRL – Greenland, GTM – Guatemala, GUM – Guam, GUY – Guyana, HND – Honduras, HRV – Croatia, HTI – Haiti, HUN – Hungary, IDN – Indonesia, IND – India, IRL – Ireland, IRN – Iran, IRQ – Iraq, ISL – Iceland, ISR – Israel, ITA – Italy, JAM – Jamaica, JOR – Jordan, JPN – Japan, KAZ – Kazakhstan, KEN – Kenya, KGZ – Kyrgyzstan, KHM – Cambodia, KIR – Kiribati, KOR – South Korea, KWT – Kuwait, LAO – Laos, LBN – Lebanon, LBR – Liberia, LBY – Libya, LCA – Saint Lucia, LKA – Sri Lanka, LSO – Lesotho, LTU – Lithuania, LUX – Luxembourg, LVA – Latvia, MAR – Morocco, MDA – Moldova, MDG – Madagascar, MDV – Maldives, MEX – Mexico, MHL – Marshall Islands, MKD – Macedonia, MLI – Mali, MLT – Malta, MMR – Myanmar, MNE – Montenegro, MNG – Mongolia, MNP – Northern Mariana Islands, MOZ – Mozambique, MRT – Mauritania, MUS – Mauritius, MWI – Malawi, MYS – Malaysia, NAM – Namibia, NER – Niger, NGA – Nigeria, NIC – Nicaragua, NLD – Netherlands, NOR – Norway, NPL – Nepal, NZL – New Zealand, OMN – Oman, PAK – Pakistan, PAN – Panama, PER – Peru, PHL – Philippines, PNG – Papua New Guinea, POL – Poland, PRI – Puerto Rico, PRK – North Korea, PRT – Portugal, PRY – Paraguay, PSE – Palestine, QAT – Qatar, ROU – Romania, RUS – Russian Federation, RWA – Rwanda, SAU – Saudi Arabia, SDN – Sudan, SEN – Senegal, SGP – Singapore, SLB – Solomon Islands, SLE – Sierra Leone, SLV – El Salvador, SOM – Somalia, SRB – Serbia, SSD – South Sudan, STP – Sao Tome and Principe, SUR – Suriname, SVK – Slovakia, SVN – Slovenia, SWE – Sweden, SWZ – Swaziland, SYC – Seychelles, SYR – Syria, TCD – Chad, TGO – Togo, THA – Thailand, TJK – Tajikistan, TKM – Turkmenistan, TLS – Timor-Leste, TON – Tonga, TTO – Trinidad and Tobago, TUN – Tunisia, TUR – Turkey, TWN – Taiwan, TZA – Tanzania, UGA – Uganda, UKR – Ukraine, URY – Uruguay, USA – United States, UZB – Uzbekistan, VCT – Saint Vincent and the Grenadines, VEN – Venezuela, VIR – Virgin Islands, U.S., VNM – Vietnam, VUT – Vanuatu, WSM – Samoa, YEM – Yemen, ZAF – South Africa, ZMB – Zambia, ZWE – Zimbabwe

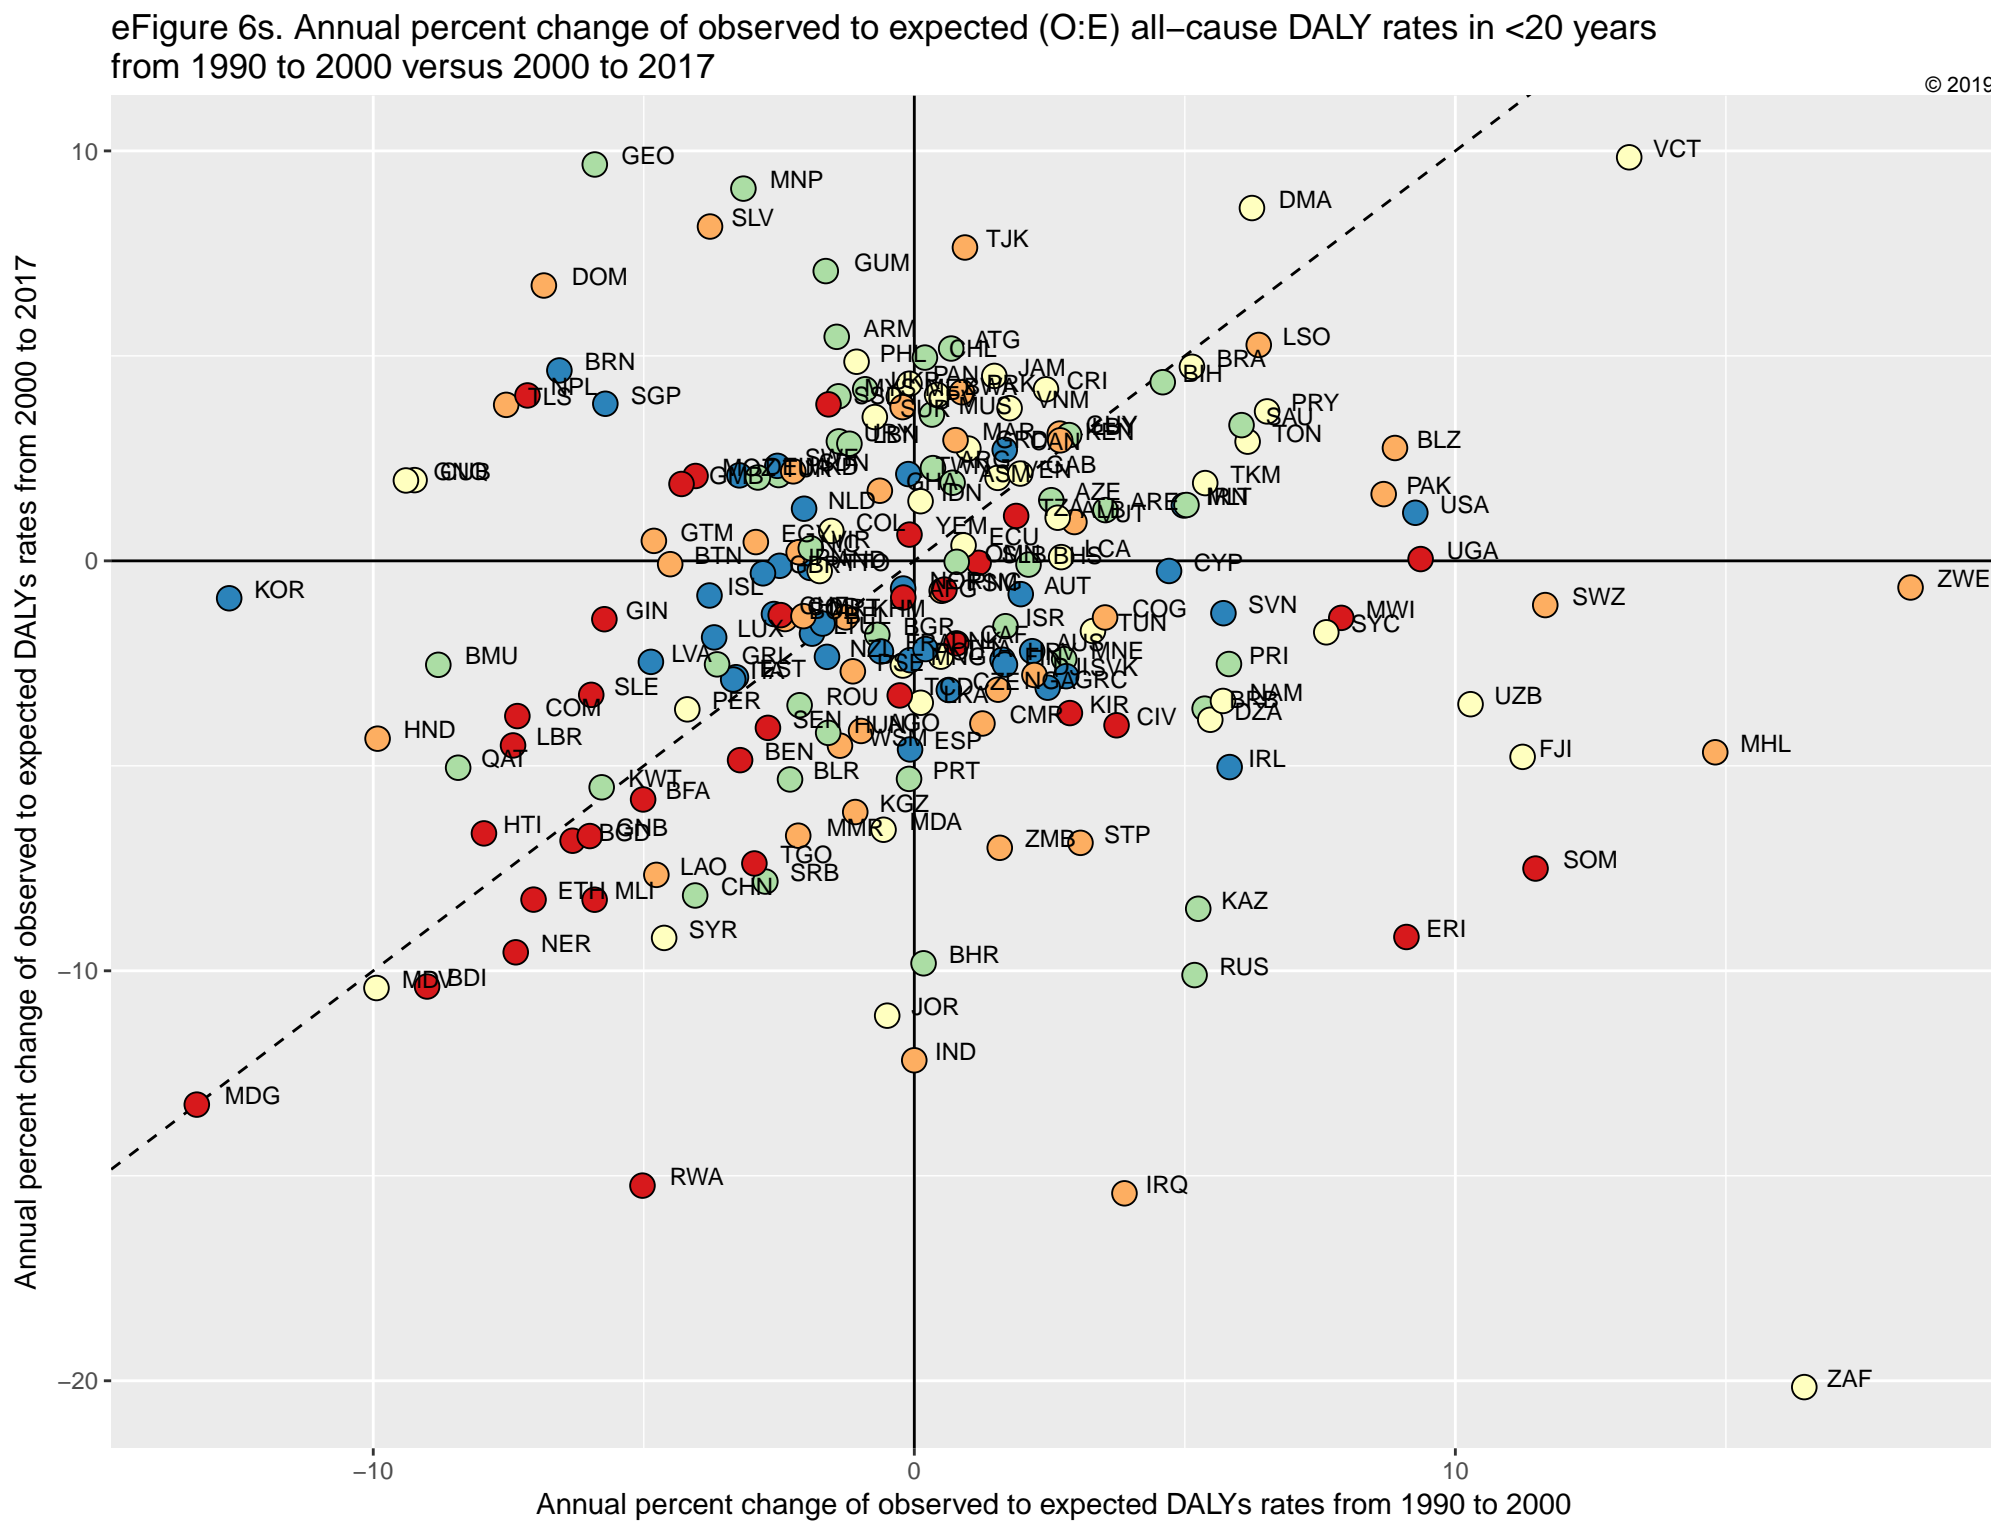

© 2019 GBD 2017 Child and Adolescent Health Collaborators. JAMA Pediatrics.

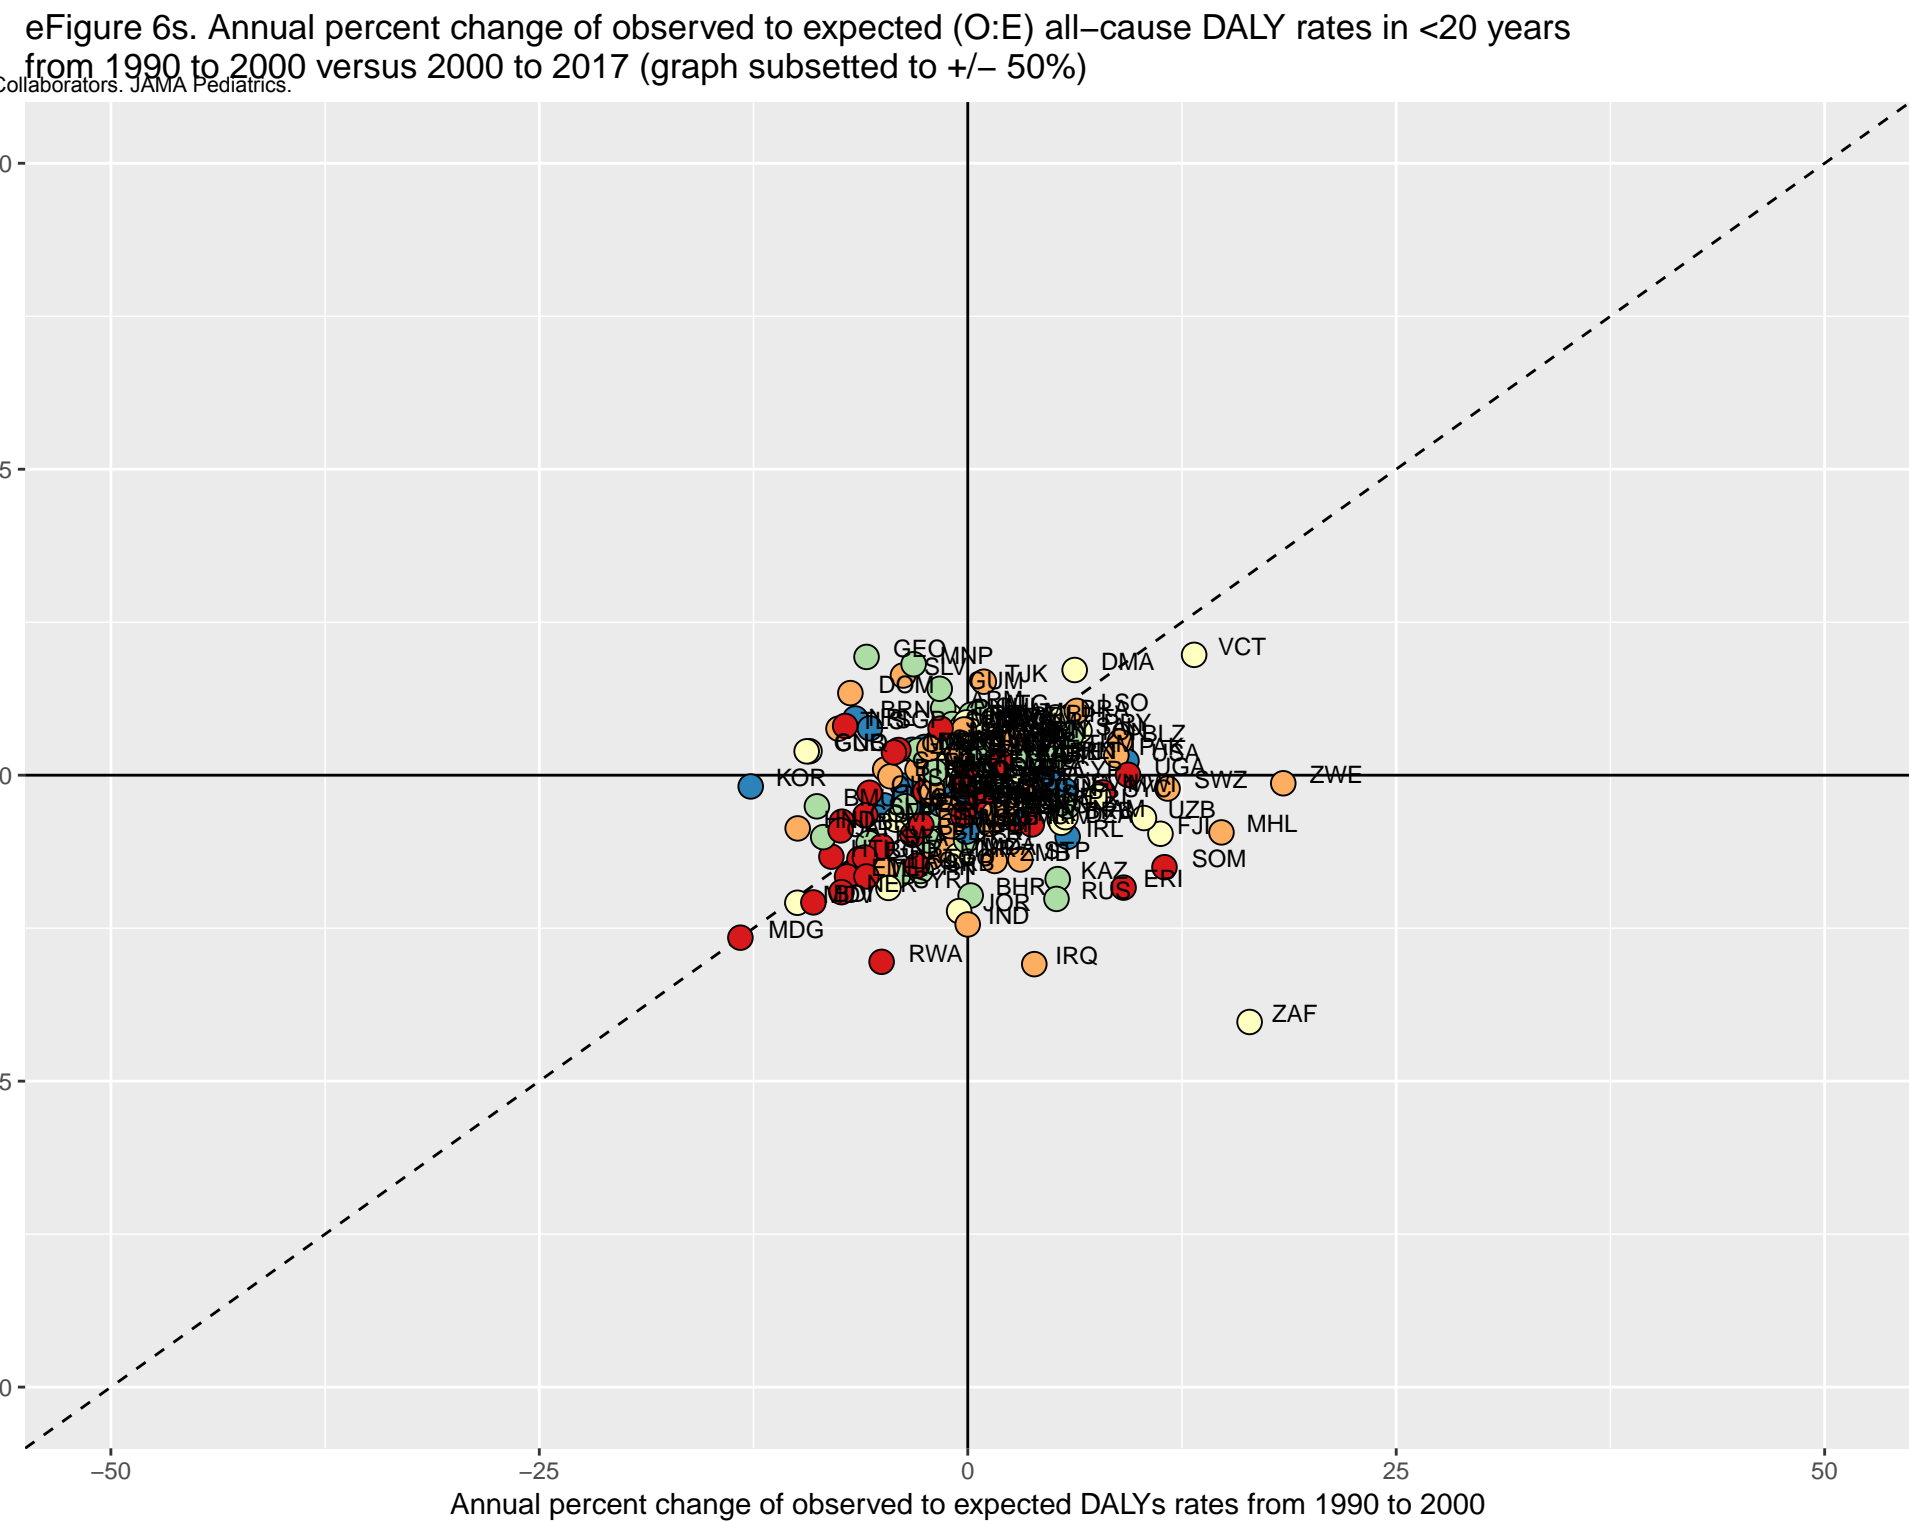

41

Annual percent change of observed versus expected (O:E) disability-adjusted life years (DALYs) rates by country for 1990 to 2000 versus 2000 to 2017 are plotted by country. In each pair of panels, the right panel focuses on changes within +/-50%. Panels a–d plot changes for all children and adolescents less than 20 years of age; panels e–h plot changes for children less than 1; panels i–l plot changes for children between 1 and 4; panels m–p plot changes for children between 5 and 9; and panels q–t plot changes for children between 10 and 19. For each age group, the first plot in the series is the all cause change in O:E rates (i.e., panels a, e, i, m, and q); the second plot in the series is the change in O:E rates associated with communicable, maternal, neonatal, and nutritional (CMNN) conditions (i.e., panels b, f, j, and r); the third plot in the series is the change in O:E rates associated with non-communicable diseases (NCDs – i.e., panels c, g, k, s); and the fourth plot in the series is the change in O:E rates associated with injuries (i.e., panels d, h, l, t). For each, countries in different socio-demographic index (SDI) quintiles are plotted with different countries. Abbreviations: DALY=disability-adjusted life year, AFG – Afghanistan, AGO – Angola, ALB – Albania, AND – Andorra, ARE – United Arab Emirates, ARG – Argentina, ARM – Armenia, ASM – American Samoa, ATG – Antigua and Barbuda, AUS – Australia, AUT – Austria, AZE – Azerbaijan, BDI – Burundi, BEL – Belgium, BEN – Benin, BFA – Burkina Faso, BGD – Bangladesh, BGR – Bulgaria, BHR – Bahrain, BHS – The Bahamas, BIH – Bosnia and Herzegovina, BLR – Belarus, BLZ – Belize, BMU – Bermuda, BOL – Bolivia, BRA – Brazil, BRB – Barbados, BRN – Brunei, BTN – Bhutan, BWA – Botswana, CAF – Central African Republic, CAN – Canada, CHE – Switzerland, CHL – Chile, CHN – China, CIV – Cote d'Ivoire, CMR – Cameroon, COD – Democratic Republic of the Congo, COG – Congo, COL – Colombia, COM – Comoros, CPV – Cape Verde, CRI – Costa Rica, CUB – Cuba, CYP – Cyprus, CZE – Czech Republic, DEU – Germany, DJI – Djibouti, DMA – Dominica, DNK – Denmark, DOM – Dominican Republic, DZA – Algeria, ECU – Ecuador, EGY – Egypt, ERI – Eritrea, ESP – Spain, EST – Estonia, ETH – Ethiopia, FIN – Finland, FJI – Fiji, FRA – France, FSM – Federated States of Micronesia, G – Global, GAB – Gabon, GBR – United Kingdom, GEO – Georgia, GHA – Ghana, GIN – Guinea, GMB – The Gambia, GNB – Guinea-Bissau, GNQ – Equatorial Guinea, GRC – Greece, GRD – Grenada, GRL – Greenland, GTM – Guatemala, GUM – Guam, GUY – Guyana, HND – Honduras, HRV – Croatia, HTI – Haiti, HUN – Hungary, IDN – Indonesia, IND – India, IRL – Ireland, IRN – Iran, IRQ – Iraq, ISL – Iceland, ISR – Israel, ITA – Italy, JAM – Jamaica, JOR – Jordan, JPN – Japan, KAZ – Kazakhstan, KEN – Kenya, KGZ – Kyrgyzstan, KHM – Cambodia, KIR – Kiribati, KOR – South Korea, KWT – Kuwait, LAO – Laos, LBN – Lebanon, LBR – Liberia, LBY – Libya, LCA – Saint Lucia, LKA – Sri Lanka, LSO – Lesotho, LTU – Lithuania, LUX – Luxembourg, LVA – Latvia, MAR – Morocco, MDA – Moldova, MDG – Madagascar, MDV – Maldives, MEX – Mexico, MHL – Marshall Islands, MKD – Macedonia, MLI – Mali, MLT – Malta, MMR – Myanmar, MNE – Montenegro, MNG – Mongolia, MNP – Northern Mariana Islands, MOZ – Mozambique, MRT – Mauritania, MUS – Mauritius, MWI – Malawi, MYS – Malaysia, NAM – Namibia, NER – Niger, NGA – Nigeria, NIC – Nicaragua, NLD – Netherlands, NOR – Norway, NPL – Nepal, NZL – New Zealand, OMN – Oman, PAK – Pakistan, PAN – Panama, PER – Peru, PHL – Philippines, PNG – Papua New Guinea, POL – Poland, PRI – Puerto Rico, PRK – North Korea, PRT – Portugal, PRY – Paraguay, PSE – Palestine, QAT – Qatar, ROU – Romania, RUS – Russian Federation, RWA – Rwanda, SAU – Saudi Arabia, SDN – Sudan, SEN – Senegal, SGP – Singapore, SLB – Solomon Islands, SLE – Sierra Leone, SLV – El Salvador, SOM – Somalia, SRB – Serbia, SSD – South Sudan, STP – Sao Tome and Principe, SUR – Suriname, SVK – Slovakia, SVN – Slovenia, SWE – Sweden, SWZ – Swaziland, SYC – Seychelles, SYR – Syria, TCD – Chad, TGO – Togo, THA – Thailand, TJK – Tajikistan, TKM – Turkmenistan, TLS – Timor-Leste, TON – Tonga, TTO – Trinidad and Tobago, TUN – Tunisia, TUR – Turkey, TWN – Taiwan, TZA – Tanzania, UGA – Uganda, UKR – Ukraine, URY – Uruguay, USA – United States, UZB – Uzbekistan, VCT – Saint Vincent and the Grenadines, VEN – Venezuela, VIR – Virgin Islands, U.S., VNM – Vietnam, VUT – Vanuatu, WSM – Samoa, YEM – Yemen, ZAF – South Africa, ZMB – Zambia, ZWE – Zimbabwe

eFigure 6t. Annual percent change of observed to expected (O:E) all-cause DALY rates in <20 years from 1990 to 2000 versus 2000 to 2017

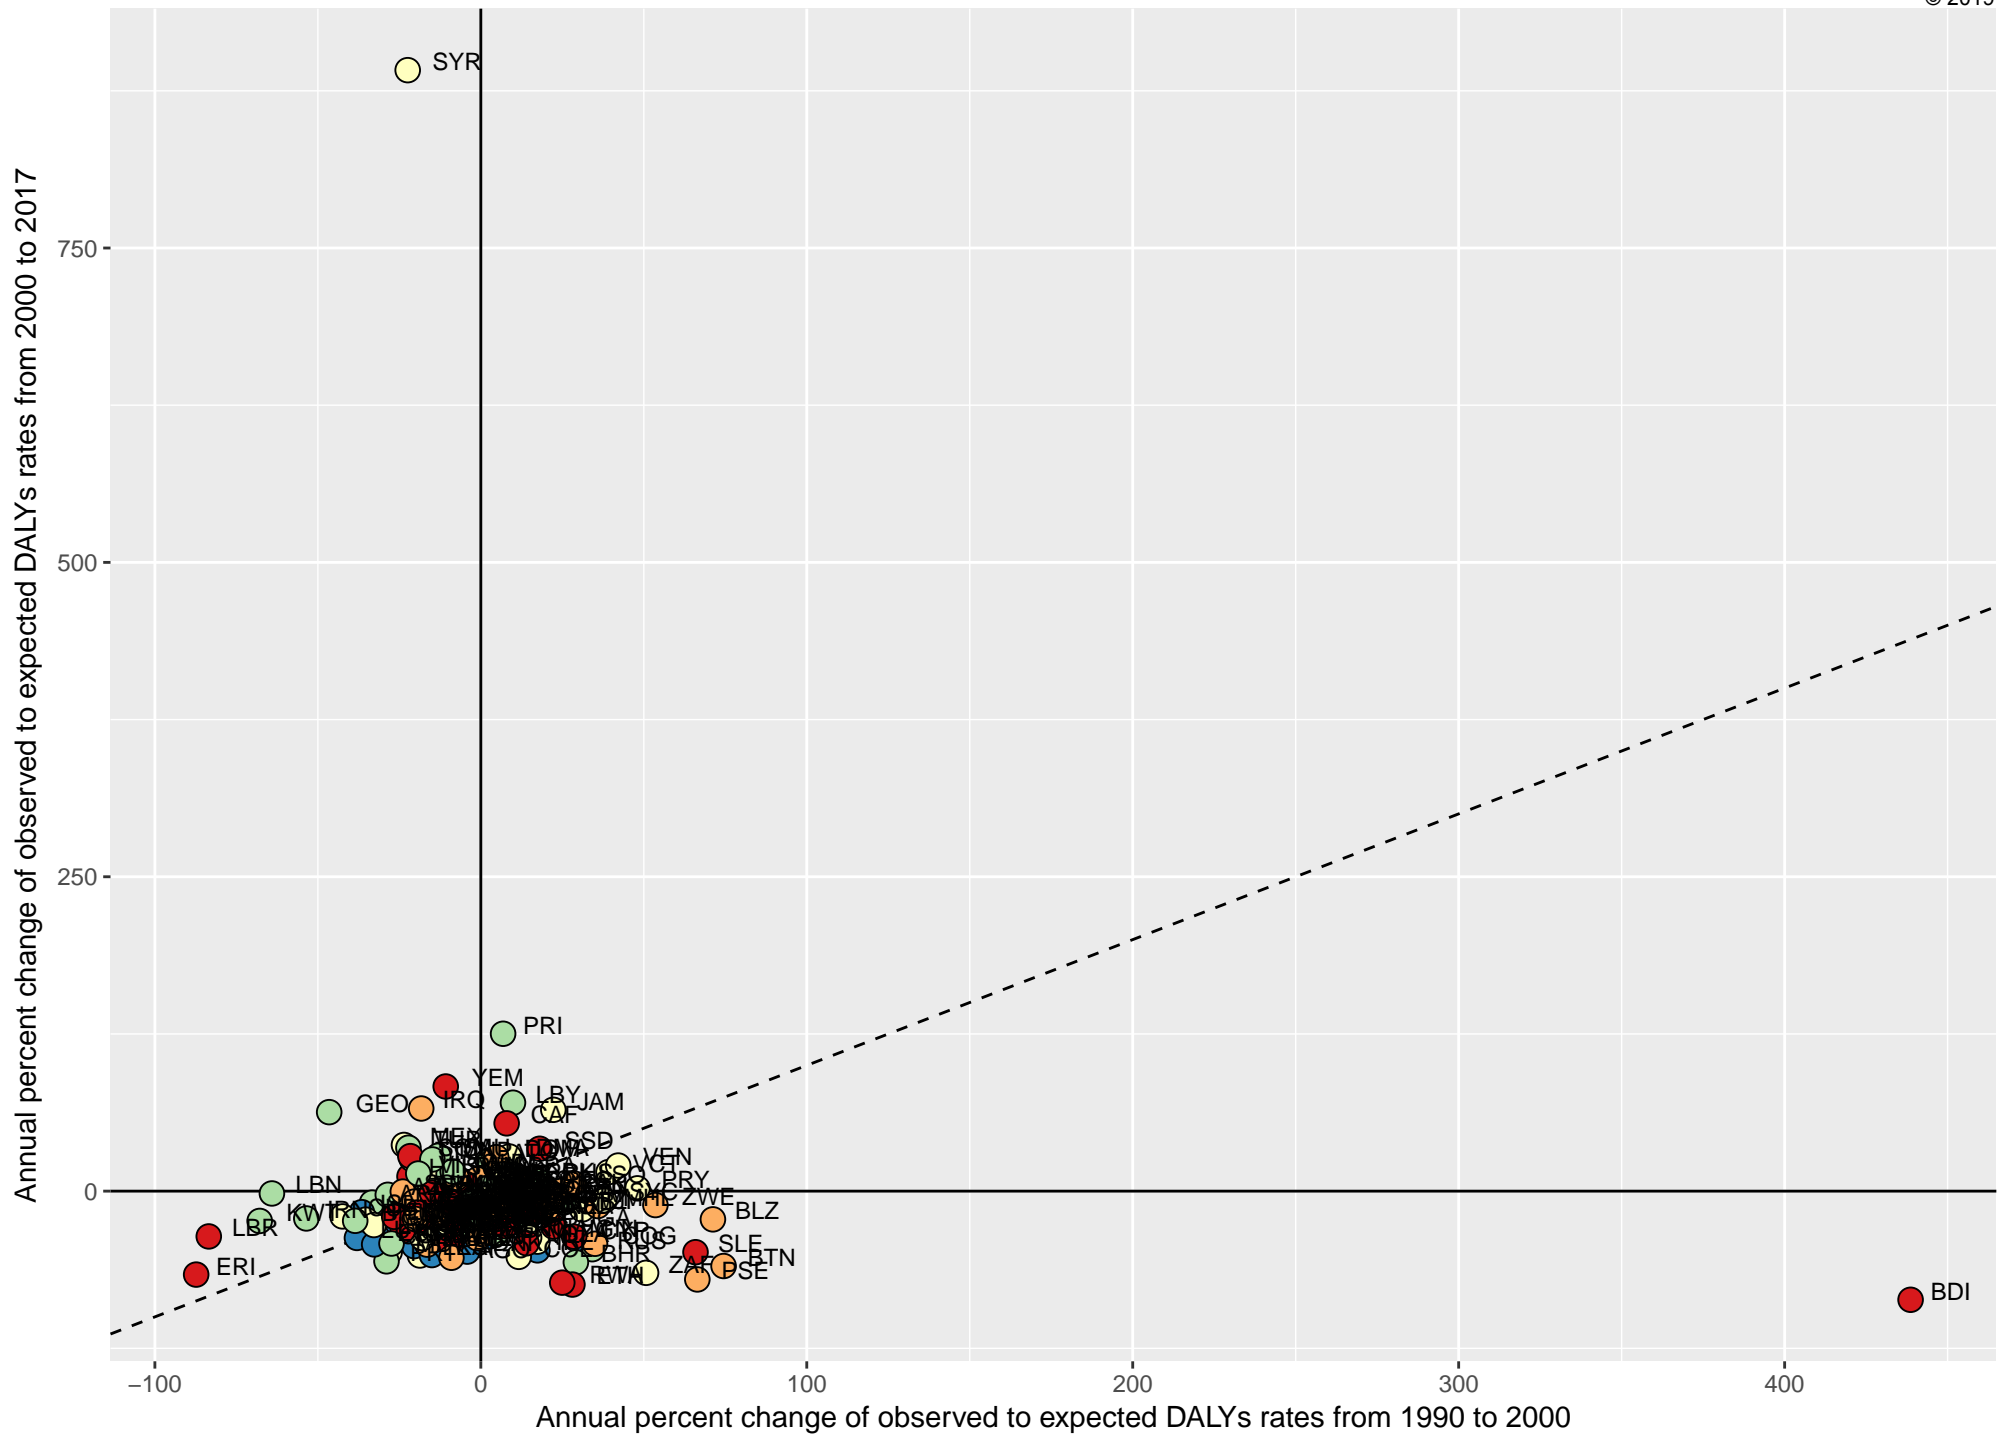

© 2019 GBD 2017 Child and Adolescent Health Collaborators. JAMA Pediatrics.

eFigure 6t. Annual percent change of observed to expected (O:E) all-cause DALY rates in <20 years from 1990 to 2000 versus 2000 to 2017 (graph subsetting to +/- 50%)

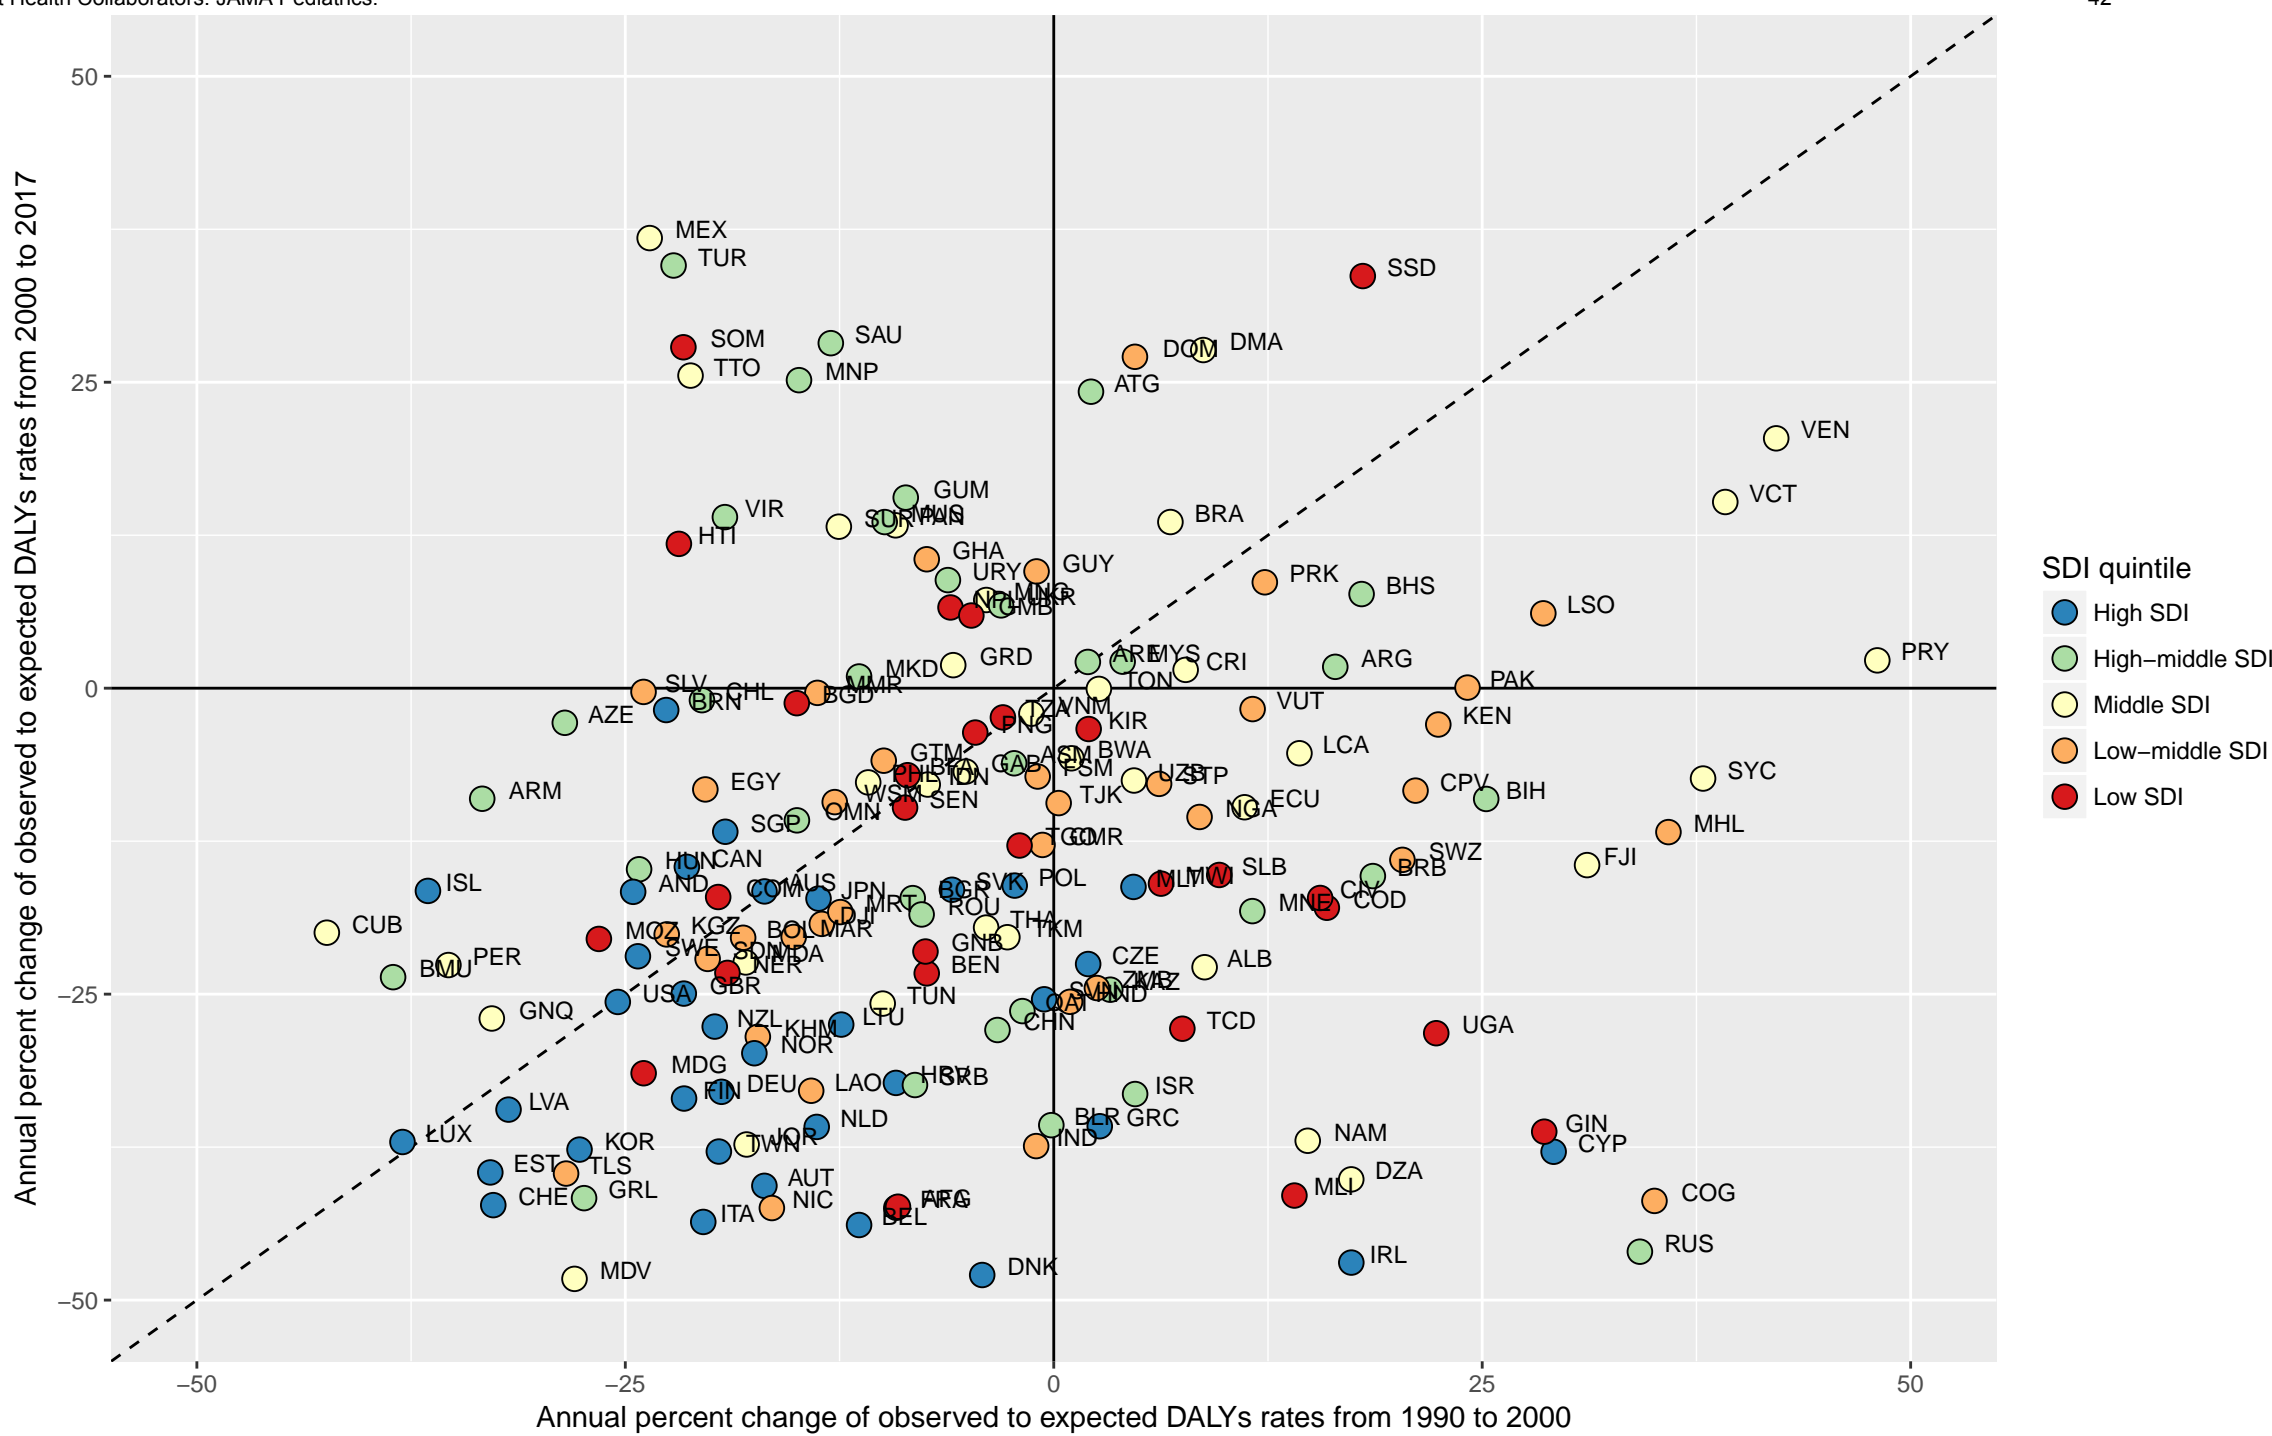

42

Annual percent change of observed versus expected (O:E) disability-adjusted life years (DALYs) rates by country for 1990 to 2000 versus 2000 to 2017 are plotted by country. In each pair of panels, the right panel focuses on changes within +/-50%. Panels a–d plot changes for all children and adolescents less than 20 years of age; panels e–h plot changes for children less than 1; panels i–l plot changes for children between 1 and 4; panels m–p plot changes for children between 5 and 9; and panels q–t plot changes for children between 10 and 19. For each age group, the first plot in the series is the all cause change in O:E rates (i.e., panels a, e, i, m, and q); the second plot in the series is the change in O:E rates associated with communicable, maternal, neonatal, and nutritional (CMNN) conditions (i.e., panels b, f, j, and r); the third plot in the series is the change in O:E rates associated with non-communicable diseases (NCDs – i.e., panels c, g, k, s); and the fourth plot in the series is the change in O:E rates associated with injuries (i.e., panels d, h, l, t). For each, countries in different socio-demographic index (SDI) quintiles are plotted with different countries. Abbreviations: DALY=disability-adjusted life year, AFG – Afghanistan, AGO – Angola, ALB – Albania, AND – Andorra, ARE – United Arab Emirates, ARG – Argentina, ARM – Armenia, ASM – American Samoa, ATG – Antigua and Barbuda, AUS – Australia, AUT – Austria, AZE – Azerbaijan, BDI – Burundi, BEL – Belgium, BEN – Benin, BFA – Burkina Faso, BGD – Bangladesh, BGR – Bulgaria, BHR – Bahrain, BHS – The Bahamas, BIH – Bosnia and Herzegovina, BLR – Belarus, BLZ – Belize, BMU – Bermuda, BOL – Bolivia, BRA – Brazil, BRB – Barbados, BRN – Brunei, BTN – Bhutan, BWA – Botswana, CAF – Central African Republic, CAN – Canada, CHE – Switzerland, CHL – Chile, CHN – China, CIV – Cote d'Ivoire, CMR – Cameroon, COD – Democratic Republic of the Congo, COG – Congo, COL – Colombia, COM – Comoros, CPV – Cape Verde, CRI – Costa Rica, CUB – Cuba, CYP – Cyprus, CZE – Czech Republic, DEU – Germany, DJI – Djibouti, DMA – Dominica, DNK – Denmark, DOM – Dominican Republic, DZA – Algeria, ECU – Ecuador, EGY – Egypt, ERI – Eritrea, ESP – Spain, EST – Estonia, ETH – Ethiopia, FIN – Finland, FJI – Fiji, FRA – France, FSM – Federated States of Micronesia, G – Global, GAB – Gabon, GBR – United Kingdom, GEO – Georgia, GHA – Ghana, GIN – Guinea, GMB – The Gambia, GNB – Guinea-Bissau, GNQ – Equatorial Guinea, GRC – Greece, GRD – Grenada, GRL – Greenland, GTM – Guatemala, GUM – Guam, GUY – Guyana, HND – Honduras, HRV – Croatia, HTI – Haiti, HUN – Hungary, IDN – Indonesia, IND – India, IRL – Ireland, IRN – Iran, IRQ – Iraq, ISL – Iceland, ISR – Israel, ITA – Italy, JAM – Jamaica, JOR – Jordan, JPN – Japan, KAZ – Kazakhstan, KEN – Kenya, KGZ – Kyrgyzstan, KHM – Cambodia, KIR – Kiribati, KOR – South Korea, KWT – Kuwait, LAO – Laos, LBN – Lebanon, LBR – Liberia, LBY – Libya, LCA – Saint Lucia, LKA – Sri Lanka, LSO – Lesotho, LTU – Lithuania, LUX – Luxembourg, LVA – Latvia, MAR – Morocco, MDA – Moldova, MDG – Madagascar, MDV – Maldives, MEX – Mexico, MHL – Marshall Islands, MKD – Macedonia, MLI – Mali, MLT – Malta, MMR – Myanmar, MNE – Montenegro, MNG – Mongolia, MNP – Northern Mariana Islands, MOZ – Mozambique, MRT – Mauritania, MUS – Mauritius, MWI – Malawi, MYS – Malaysia, NAM – Namibia, NER – Niger, NGA – Nigeria, NIC – Nicaragua, NLD – Netherlands, NOR – Norway, NPL – Nepal, NZL – New Zealand, OMN – Oman, PAK – Pakistan, PAN – Panama, PER – Peru, PHL – Philippines, PNG – Papua New Guinea, POL – Poland, PRI – Puerto Rico, PRK – North Korea, PRT – Portugal, PRY – Paraguay, PSE – Palestine, QAT – Qatar, ROU – Romania, RUS – Russian Federation, RWA – Rwanda, SAU – Saudi Arabia, SDN – Sudan, SEN – Senegal, SGP – Singapore, SLB – Solomon Islands, SLE – Sierra Leone, SLV – El Salvador, SOM – Somalia, SRB – Serbia, SSD – South Sudan, STP – Sao Tome and Principe, SUR – Suriname, SVK – Slovakia, SVN – Slovenia, SWE – Sweden, SWZ – Swaziland, SYC – Seychelles, SYR – Syria, TCD – Chad, TGO – Togo, THA – Thailand, TJK – Tajikistan, TKM – Turkmenistan, TLS – Timor-Leste, TON – Tonga, TTO – Trinidad and Tobago, TUN – Tunisia, TUR – Turkey, TWN – Taiwan, TZA – Tanzania, UGA – Uganda, UKR – Ukraine, URY – Uruguay, USA – United States, UZB – Uzbekistan, VCT – Saint Vincent and the Grenadines, VEN – Venezuela, VIR – Virgin Islands, U.S., VNM – Vietnam, VUT – Vanuatu, WSM – Samoa, YEM – Yemen, ZAF – South Africa, ZMB – Zambia, ZWE – Zimbabwe

**eFigure 7a. Leading ten causes of DALYs with the ratio of observed DALYs to DALYs expected on the basis of Socio-Demographic Index alone in 2017, <20 years, both sexes combined.** The top ten causes contributing to DALYs are listed globally, by socio-demographic quintile, and then by GBD superregion, region, country, and subnationally where modeled. For each cell, the ratio of observed DALYs to DALYs expected on the basis of socio-demographic index (SDI) alone are listed. Abbreviations: DALY=disability-adjusted life year, GBD=Global Burden of Disease.

Values shown in brackets represent the ratio of observed DALYs to predicted DALYs on the basis of Socio-Demographic Index (SDI), rounded to two (2) digits. Color ranges (shown below) were calculated to place a roughly equal number of cells into each bin.

| COLOR KEY:                                       |                    | [0.0-0.5]            | [0.5-0.69]           | [0.69-0.82]          | [0.82-0.92]          | [0.92-1.01]          | [1.01-1.18]          | [1.18-1.48]          | [1.48-2.26]          | 2.26+                  |
|--------------------------------------------------|--------------------|----------------------|----------------------|----------------------|----------------------|----------------------|----------------------|----------------------|----------------------|------------------------|
|                                                  | 1                  | 2                    | 3                    | 4                    | 5                    | 6                    | 7                    | 8                    | 9                    | 10                     |
| Global                                           | Neonatal<br>[1.38] | LRI<br>[1.83]        | Diarrhea<br>[4.96]   | Congenital<br>[0.78] | Malaria<br>[4596.33] | Meningitis<br>[1.54] | Road Inj<br>[0.69]   | Iron<br>[2.08]       | PEM<br>[9.73]        | HIV<br>[10.49]         |
| Low SDI                                          | Neonatal<br>[0.7]  | LRI<br>[0.51]        | Diarrhea<br>[0.63]   | Malaria<br>[21.05]   | Congenital<br>[0.61] | PEM<br>[0.75]        | Meningitis<br>[0.45] | HIV<br>[4.72]        | Iron<br>[1.2]        | STI<br>[0.99]          |
| Low-middle SDI                                   | Neonatal<br>[1.05] | LRI<br>[0.91]        | Diarrhea<br>[1.62]   | Malaria<br>[0.65]    | Malaria<br>[542.96]  | Meningitis<br>[0.92] | Iron<br>[1.64]       | PEM<br>[1.7]         | Road Inj<br>[0.65]   | HIV<br>[6.08]          |
| Middle SDI                                       | Neonatal<br>[0.77] | Congenital<br>[0.58] | LRI<br>[0.8]         | Diarrhea<br>[1.44]   | Road Inj<br>[0.64]   | Drown<br>[0.88]      | Headaches<br>[0.81]  | Iron<br>[1.12]       | Violence<br>[1.14]   | HIV<br>[5.26]          |
| High-middle SDI                                  | Neonatal<br>[1.64] | Congenital<br>[1.32] | Road Inj<br>[1.0]    | LRI<br>[4.63]        | Headaches<br>[0.75]  | Drown<br>[2.57]      | Anxiety<br>[0.72]    | Diarrhea<br>[2.89]   | Conduct<br>[0.89]    | Back Pain<br>[0.77]    |
| High SDI                                         | Neonatal<br>[0.45] | Congenital<br>[0.4]  | Headaches<br>[0.92]  | Dermatitis<br>[1.2]  | Anxiety<br>[1.16]    | Road Inj<br>[0.44]   | Depression<br>[1.31] | Conduct<br>[0.98]    | Back Pain<br>[1.05]  | Drugs<br>[3.05]        |
| Central Europe, Eastern Europe, and Central Asia | Neonatal<br>[1.16] | LRI<br>[4.04]        | Congenital<br>[0.77] | Road Inj<br>[0.57]   | Diarrhea<br>[2.45]   | Headaches<br>[0.82]  | Falls<br>[1.54]      | Iron<br>[2.41]       | Drown<br>[1.26]      | Conduct<br>[0.94]      |
| Central Asia                                     | Neonatal<br>[1.27] | LRI<br>[3.48]        | Congenital<br>[0.75] | Diarrhea<br>[2.19]   | Iron<br>[2.31]       | Drown<br>[1.1]       | Road Inj<br>[0.46]   | Headaches<br>[0.78]  | Epilepsy<br>[1.47]   | Conduct<br>[0.88]      |
| Armenia                                          | Neonatal<br>[0.58] | Congenital<br>[0.66] | LRI<br>[1.11]        | Iron<br>[3.01]       | Headaches<br>[0.79]  | Conduct<br>[0.92]    | Diarrhea<br>[0.92]   | Road Inj<br>[0.26]   | Falls<br>[0.92]      | Back Pain<br>[0.68]    |
| Azerbaijan                                       | Neonatal<br>[1.93] | LRI<br>[6.77]        | Congenital<br>[1.24] | Diarrhea<br>[2.45]   | Enceph<br>[5.24]     | Leukemia<br>[1.51]   | Epilepsy<br>[1.76]   | Headaches<br>[0.79]  | Iron<br>[1.56]       | Fire<br>[2.46]         |
| Georgia                                          | Neonatal<br>[1.01] | Congenital<br>[0.48] | LRI<br>[0.58]        | Road Inj<br>[0.55]   | Headaches<br>[0.79]  | Conduct<br>[0.91]    | Diarrhea<br>[0.86]   | Iron<br>[1.1]        | Epilepsy<br>[1.07]   | Falls<br>[1.05]        |
| Kazakhstan                                       | Neonatal<br>[1.18] | Congenital<br>[1.01] | LRI<br>[1.9]         | Road Inj<br>[0.72]   | Drown<br>[1.48]      | F Body<br>[1.91]     | Vit A<br>[3.21]      | Self Harm<br>[1.44]  | Headaches<br>[0.71]  | Iron<br>[1.74]         |
| Kyrgyzstan                                       | Neonatal<br>[1.11] | LRI<br>[0.73]        | Congenital<br>[0.52] | Iron<br>[1.88]       | Diarrhea<br>[0.66]   | Drown<br>[0.67]      | Road Inj<br>[0.42]   | Headaches<br>[0.79]  | Epilepsy<br>[1.08]   | Vit A<br>[1.14]        |
| Mongolia                                         | Neonatal<br>[1.69] | LRI<br>[2.57]        | Congenital<br>[0.87] | Road Inj<br>[0.72]   | F Body<br>[1.56]     | Fire<br>[2.6]        | Diarrhea<br>[0.94]   | Falls<br>[1.99]      | Vit A<br>[2.22]      | Drown<br>[0.77]        |
| Tajikistan                                       | Neonatal<br>[0.91] | LRI<br>[1.61]        | Diarrhea<br>[1.72]   | Congenital<br>[0.79] | Drown<br>[0.95]      | Iron<br>[0.9]        | Meningitis<br>[0.36] | Epilepsy<br>[1.55]   | Vit A<br>[0.98]      | Falls<br>[1.58]        |
| Turkmenistan                                     | Neonatal<br>[1.58] | LRI<br>[4.41]        | Congenital<br>[1.2]  | Diarrhea<br>[1.38]   | Iron<br>[1.56]       | Headaches<br>[0.75]  | Drown<br>[0.85]      | Epilepsy<br>[1.36]   | F Body<br>[1.08]     | Conduct<br>[0.86]      |
| Uzbekistan                                       | LRI<br>[2.4]       | Neonatal<br>[0.8]    | Congenital<br>[0.38] | Iron<br>[2.64]       | Drown<br>[0.9]       | Road Inj<br>[0.44]   | Headaches<br>[0.83]  | Enceph<br>[2.46]     | Epilepsy<br>[1.39]   | Self Harm<br>[1.3]     |
| Central Europe                                   | Neonatal<br>[0.81] | Congenital<br>[0.67] | Falls<br>[1.76]      | Headaches<br>[0.85]  | LRI<br>[1.69]        | Road Inj<br>[0.51]   | Conduct<br>[0.99]    | Back Pain<br>[1.89]  | Diarrhea<br>[2.06]   | Anxiety<br>[0.67]      |
| Albania                                          | Neonatal<br>[0.72] | Congenital<br>[0.75] | LRI<br>[0.86]        | Headaches<br>[0.95]  | Falls<br>[1.95]      | Road Inj<br>[0.41]   | Back Pain<br>[1.19]  | Conduct<br>[1.0]     | Epilepsy<br>[1.24]   | Anxiety<br>[0.82]      |
| Bosnia                                           | Neonatal<br>[0.51] | Congenital<br>[0.49] | Headaches<br>[0.93]  | Falls<br>[1.92]      | Conduct<br>[1.0]     | Road Inj<br>[0.34]   | Back Pain<br>[0.96]  | Anxiety<br>[0.79]    | Vit A<br>[1.61]      | Dermatitis<br>[0.59]   |
| Bulgaria                                         | Neonatal<br>[0.78] | Congenital<br>[0.77] | LRI<br>[1.84]        | Falls<br>[1.87]      | Road Inj<br>[0.55]   | Headaches<br>[0.83]  | Conduct<br>[0.97]    | Diarrhea<br>[1.93]   | Anxiety<br>[0.71]    | Back Pain<br>[0.83]    |
| Croatia                                          | Neonatal<br>[0.77] | Congenital<br>[0.61] | Headaches<br>[0.88]  | Road Inj<br>[0.56]   | Conduct<br>[1.01]    | Back Pain<br>[0.9]   | Falls<br>[1.12]      | Anxiety<br>[0.68]    | Dermatitis<br>[0.56] | Diarrhea<br>[1.79]     |
| Czech                                            | Neonatal<br>[0.56] | Congenital<br>[0.45] | Falls<br>[1.91]      | Headaches<br>[0.79]  | Back Pain<br>[0.93]  | Conduct<br>[0.96]    | Road Inj<br>[0.45]   | Diarrhea<br>[2.5]    | Dermatitis<br>[0.66] | Anxiety<br>[0.61]      |
| Hungary                                          | Neonatal<br>[0.75] | Congenital<br>[0.64] | Headaches<br>[0.87]  | Falls<br>[1.71]      | Diarrhea<br>[2.85]   | Back Pain<br>[1.01]  | Conduct<br>[1.01]    | Dermatitis<br>[0.76] | Road Inj<br>[0.38]   | Anxiety<br>[0.68]      |
| Macedonia                                        | Neonatal<br>[1.12] | Congenital<br>[0.55] | Headaches<br>[0.88]  | Falls<br>[1.83]      | Road Inj<br>[0.5]    | LRI<br>[0.76]        | Conduct<br>[0.97]    | Iron<br>[1.81]       | Diarrhea<br>[1.42]   | Anxiety<br>[0.72]      |
| Montenegro                                       | Neonatal<br>[0.69] | Congenital<br>[0.29] | Headaches<br>[0.89]  | Falls<br>[1.75]      | Road Inj<br>[0.48]   | Conduct<br>[1.01]    | Back Pain<br>[0.97]  | Anxiety<br>[0.71]    | Dermatitis<br>[0.57] | Depression<br>[0.65]   |
| Poland                                           | Neonatal<br>[0.9]  | Congenital<br>[0.76] | Falls<br>[1.66]      | Headaches<br>[0.84]  | Road Inj<br>[0.57]   | Conduct<br>[0.98]    | Dermatitis<br>[0.75] | Anxiety<br>[0.64]    | Back Pain<br>[0.72]  | Upper Digest<br>[4.49] |
| Romania                                          | Neonatal<br>[0.73] | LRI<br>[3.57]        | Congenital<br>[0.67] | Iron<br>[4.07]       | Falls<br>[1.91]      | Road Inj<br>[0.58]   | Headaches<br>[0.87]  | Diarrhea<br>[2.35]   | Back Pain<br>[1.08]  | Conduct<br>[1.0]       |
| Serbia                                           | Neonatal<br>[0.66] | Congenital<br>[0.37] | Headaches<br>[0.88]  | Falls<br>[1.79]      | Conduct<br>[1.0]     | Back Pain<br>[1.01]  | Road Inj<br>[0.33]   | Anxiety<br>[0.73]    | Dermatitis<br>[0.58] | Diarrhea<br>[0.96]     |
| Slovakia                                         | Neonatal<br>[0.87] | Congenital<br>[0.83] | Falls<br>[1.72]      | Headaches<br>[0.84]  | Road Inj<br>[0.51]   | LRI<br>[1.93]        | Back Pain<br>[0.97]  | Conduct<br>[0.98]    | Diarrhea<br>[2.74]   | Anxiety<br>[0.65]      |
| Slovenia                                         | Neonatal<br>[0.56] | Congenital<br>[0.53] | Falls<br>[1.91]      | Headaches<br>[0.81]  | Road Inj<br>[0.53]   | Back Pain<br>[0.98]  | Conduct<br>[0.97]    | Anxiety<br>[0.61]    | Diarrhea<br>[2.45]   | Dermatitis<br>[0.57]   |

**eFigure 7a. Leading ten causes of DALYs with the ratio of observed DALYs to DALYs expected on the basis of Socio-Demographic Index alone in 2017, <20 years, both sexes combined.** The top ten causes contributing to DALYs are listed globally, by socio-demographic quintile, and then by GBD superregion, region, country, and subnationally where modeled. For each cell, the ratio of observed DALYs to DALYs expected on the basis of socio-demographic index (SDI) alone are listed. Abbreviations: DALY=disability-adjusted life year, GBD=Global Burden of Disease.

Values shown in brackets represent the ratio of observed DALYs to predicted DALYs on the basis of Socio-Demographic Index (SDI), rounded to two (2) digits. Color ranges (shown below) were calculated to place a roughly equal number of cells into each bin.

| COLOR KEY:                      |                    | [0.0-0.5]            | [0.5-0.69]           | [0.69-0.82]          | [0.82-0.92]            | [0.92-1.01]            | [1.01-1.18]            | [1.18-1.48]          | [1.48-2.26]            | 2.26+                  |
|---------------------------------|--------------------|----------------------|----------------------|----------------------|------------------------|------------------------|------------------------|----------------------|------------------------|------------------------|
|                                 | 1                  | 2                    | 3                    | 4                    | 5                      | 6                      | 7                      | 8                    | 9                      | 10                     |
| <b>Eastern Europe</b>           | Neonatal<br>[0.87] | Congenital<br>[0.73] | Road Inj<br>[0.67]   | LRI<br>[1.18]        | Headaches<br>[0.84]    | Falls<br>[1.59]        | Self Harm<br>[1.33]    | Conduct<br>[0.96]    | Upper Digest<br>[5.45] | Drown<br>[1.29]        |
| Belarus                         | Neonatal<br>[0.75] | Congenital<br>[0.68] | Headaches<br>[0.86]  | Falls<br>[1.65]      | Road Inj<br>[0.4]      | Conduct<br>[0.91]      | Upper Digest<br>[5.33] | Drown<br>[1.21]      | Dermatitis<br>[0.73]   | Back Pain<br>[0.75]    |
| Estonia                         | Neonatal<br>[0.73] | Congenital<br>[0.56] | Headaches<br>[0.88]  | Dermatitis<br>[0.94] | Falls<br>[1.28]        | Conduct<br>[0.97]      | Upper Digest<br>[6.15] | Road Inj<br>[0.38]   | Diarrhea<br>[2.37]     | Back Pain<br>[0.67]    |
| Latvia                          | Neonatal<br>[0.79] | Congenital<br>[0.65] | Headaches<br>[0.88]  | Road Inj<br>[0.49]   | Upper Digest<br>[6.83] | Falls<br>[1.36]        | Conduct<br>[0.95]      | Drown<br>[1.77]      | Dermatitis<br>[0.66]   | Diarrhea<br>[2.1]      |
| Lithuania                       | Neonatal<br>[0.82] | Congenital<br>[0.84] | Headaches<br>[1.01]  | Road Inj<br>[0.52]   | Falls<br>[1.39]        | Upper Digest<br>[6.51] | Conduct<br>[0.98]      | Self Harm<br>[1.31]  | LRI<br>[1.79]          | Diarrhea<br>[2.39]     |
| Moldova                         | Neonatal<br>[0.76] | Congenital<br>[0.89] | LRI<br>[1.04]        | Road Inj<br>[0.51]   | Headaches<br>[0.97]    | Upper Digest<br>[6.37] | Iron<br>[1.4]          | Falls<br>[1.71]      | Drown<br>[0.78]        | F Body<br>[1.05]       |
| Russian Federation              | Neonatal<br>[0.87] | Congenital<br>[0.67] | Road Inj<br>[0.66]   | LRI<br>[1.28]        | Headaches<br>[0.82]    | Falls<br>[1.57]        | Conduct<br>[0.96]      | Self Harm<br>[1.27]  | Upper Digest<br>[5.35] | Drown<br>[1.22]        |
| Ukraine                         | Neonatal<br>[0.75] | Congenital<br>[0.82] | Road Inj<br>[0.71]   | Self Harm<br>[1.77]  | Headaches<br>[0.89]    | Falls<br>[1.71]        | Drown<br>[1.22]        | LRI<br>[0.57]        | Conduct<br>[0.98]      | Upper Digest<br>[5.34] |
| <b>High-income</b>              | Neonatal<br>[0.85] | Congenital<br>[0.67] | Dermatitis<br>[1.2]  | Headaches<br>[0.93]  | Anxiety<br>[1.09]      | Road Inj<br>[0.57]     | Depression<br>[1.35]   | Back Pain<br>[1.02]  | Conduct<br>[1.02]      | Asthma<br>[1.05]       |
| <b>Australasia</b>              | Neonatal<br>[0.83] | Congenital<br>[0.61] | Asthma<br>[1.97]     | Anxiety<br>[1.19]    | Falls<br>[1.71]        | Dermatitis<br>[1.08]   | Depression<br>[1.52]   | Headaches<br>[0.84]  | Back Pain<br>[1.14]    | Road Inj<br>[0.56]     |
| Australia                       | Neonatal<br>[0.84] | Congenital<br>[0.62] | Asthma<br>[2.02]     | Anxiety<br>[1.14]    | Falls<br>[1.65]        | Depression<br>[1.54]   | Headaches<br>[0.83]    | Dermatitis<br>[1.03] | Back Pain<br>[1.08]    | Road Inj<br>[0.54]     |
| New Zealand                     | Neonatal<br>[0.79] | Congenital<br>[0.56] | Anxiety<br>[1.48]    | Dermatitis<br>[1.35] | Falls<br>[2.06]        | Back Pain<br>[1.43]    | Road Inj<br>[0.68]     | Asthma<br>[1.68]     | Headaches<br>[0.85]    | Depression<br>[1.41]   |
| <b>High-income Asia Pacific</b> | Neonatal<br>[0.56] | Congenital<br>[0.5]  | Dermatitis<br>[1.2]  | Back Pain<br>[1.2]   | Headaches<br>[0.77]    | Anxiety<br>[0.8]       | Conduct<br>[0.99]      | Falls<br>[1.06]      | Depression<br>[0.95]   | Road Inj<br>[0.37]     |
| Brunei                          | Neonatal<br>[1.21] | Congenital<br>[1.31] | Road Inj<br>[0.99]   | LRI<br>[4.12]        | Dermatitis<br>[1.13]   | Headaches<br>[0.74]    | Drown<br>[2.56]        | Anxiety<br>[0.81]    | Back Pain<br>[0.96]    | Falls<br>[1.21]        |
| Japan                           | Neonatal<br>[0.47] | Congenital<br>[0.53] | Dermatitis<br>[1.27] | Back Pain<br>[1.28]  | Headaches<br>[0.72]    | Conduct<br>[1.03]      | Anxiety<br>[0.78]      | Falls<br>[1.11]      | Depression<br>[0.92]   | Asthma<br>[0.8]        |
| Aichi                           | Neonatal<br>[0.49] | Congenital<br>[0.54] | Dermatitis<br>[1.28] | Back Pain<br>[1.25]  | Conduct<br>[1.02]      | Anxiety<br>[0.77]      | Falls<br>[1.09]        | Headaches<br>[0.56]  | Depression<br>[0.91]   | ASD<br>[2.01]          |
| Akita                           | Neonatal<br>[0.39] | Congenital<br>[0.43] | Dermatitis<br>[1.25] | Back Pain<br>[1.38]  | Headaches<br>[0.77]    | Conduct<br>[1.05]      | Anxiety<br>[0.85]      | Falls<br>[1.19]      | Depression<br>[1.05]   | Road Inj<br>[0.33]     |
| Aomori                          | Neonatal<br>[0.41] | Congenital<br>[0.41] | Dermatitis<br>[1.25] | Back Pain<br>[1.37]  | Headaches<br>[0.76]    | Conduct<br>[1.04]      | Anxiety<br>[0.84]      | Falls<br>[1.17]      | Depression<br>[1.0]    | Road Inj<br>[0.33]     |
| Chiba                           | Neonatal<br>[0.47] | Congenital<br>[0.58] | Dermatitis<br>[1.26] | Back Pain<br>[1.29]  | Headaches<br>[0.74]    | Conduct<br>[1.04]      | Anxiety<br>[0.79]      | Falls<br>[1.13]      | Depression<br>[0.94]   | Road Inj<br>[0.34]     |
| Ehime                           | Neonatal<br>[0.34] | Congenital<br>[0.39] | Dermatitis<br>[1.27] | Back Pain<br>[1.28]  | Headaches<br>[0.73]    | Conduct<br>[1.03]      | Anxiety<br>[0.81]      | Falls<br>[1.16]      | Road Inj<br>[0.37]     | Depression<br>[0.92]   |
| Fukui                           | Neonatal<br>[0.41] | Congenital<br>[0.41] | Dermatitis<br>[1.26] | Back Pain<br>[1.29]  | Headaches<br>[0.73]    | Conduct<br>[1.04]      | Anxiety<br>[0.8]       | Falls<br>[1.12]      | Depression<br>[0.91]   | Road Inj<br>[0.33]     |
| Fukuoka                         | Neonatal<br>[0.46] | Congenital<br>[0.5]  | Dermatitis<br>[1.28] | Back Pain<br>[1.24]  | Headaches<br>[0.71]    | Conduct<br>[1.0]       | Anxiety<br>[0.78]      | Falls<br>[1.11]      | Depression<br>[0.89]   | Asthma<br>[0.81]       |
| Fukushima                       | Neonatal<br>[0.37] | Congenital<br>[0.44] | Dermatitis<br>[1.25] | Back Pain<br>[1.34]  | Headaches<br>[0.74]    | Conduct<br>[1.04]      | Anxiety<br>[0.83]      | Falls<br>[1.17]      | Depression<br>[0.96]   | Road Inj<br>[0.36]     |
| Gifu                            | Neonatal<br>[0.44] | Congenital<br>[0.46] | Dermatitis<br>[1.26] | Back Pain<br>[1.33]  | Headaches<br>[0.75]    | Conduct<br>[1.04]      | Anxiety<br>[0.81]      | Falls<br>[1.16]      | Road Inj<br>[0.4]      | Depression<br>[0.81]   |
| Gunma                           | Neonatal<br>[0.42] | Congenital<br>[0.46] | Dermatitis<br>[1.25] | Back Pain<br>[1.34]  | Headaches<br>[0.75]    | Conduct<br>[1.05]      | Anxiety<br>[0.82]      | Falls<br>[1.16]      | Road Inj<br>[0.41]     | Depression<br>[0.99]   |
| Hiroshima                       | Neonatal<br>[0.47] | Congenital<br>[0.47] | Dermatitis<br>[1.28] | Back Pain<br>[1.23]  | Headaches<br>[0.71]    | Conduct<br>[1.02]      | Anxiety<br>[0.77]      | Falls<br>[1.1]       | Depression<br>[0.87]   | Asthma<br>[0.81]       |
| Hokkaido                        | Neonatal<br>[0.4]  | Congenital<br>[0.46] | Dermatitis<br>[1.26] | Back Pain<br>[1.32]  | Headaches<br>[0.74]    | Conduct<br>[1.03]      | Anxiety<br>[0.81]      | Falls<br>[1.14]      | Depression<br>[0.95]   | Asthma<br>[0.8]        |
| Hyogo                           | Neonatal<br>[0.44] | Congenital<br>[0.41] | Dermatitis<br>[1.26] | Back Pain<br>[1.29]  | Headaches<br>[0.74]    | Conduct<br>[1.03]      | Anxiety<br>[0.79]      | Falls<br>[1.12]      | Depression<br>[0.95]   | Acne<br>[1.33]         |
| Ibaraki                         | Neonatal<br>[0.47] | Congenital<br>[0.55] | Dermatitis<br>[1.26] | Back Pain<br>[1.31]  | Conduct<br>[1.04]      | Anxiety<br>[0.81]      | Road Inj<br>[0.48]     | Headaches<br>[0.65]  | Falls<br>[1.14]        | Depression<br>[0.96]   |
| Ishikawa                        | Neonatal<br>[0.42] | Congenital<br>[0.47] | Dermatitis<br>[1.26] | Back Pain<br>[1.31]  | Headaches<br>[0.75]    | Conduct<br>[1.04]      | Anxiety<br>[0.81]      | Falls<br>[1.13]      | Depression<br>[0.92]   | Road Inj<br>[0.35]     |
| Iwate                           | Neonatal<br>[0.4]  | Congenital<br>[0.46] | Dermatitis<br>[1.26] | Back Pain<br>[1.34]  | Headaches<br>[0.74]    | Conduct<br>[1.03]      | Anxiety<br>[0.83]      | Falls<br>[1.17]      | Depression<br>[1.0]    | Road Inj<br>[0.32]     |

**eFigure 7a. Leading ten causes of DALYs with the ratio of observed DALYs to DALYs expected on the basis of Socio-Demographic Index alone in 2017, <20 years, both sexes combined.** The top ten causes contributing to DALYs are listed globally, by socio-demographic quintile, and then by GBD superregion, region, country, and subnationally where modeled. For each cell, the ratio of observed DALYs to DALYs expected on the basis of socio-demographic index (SDI) alone are listed. Abbreviations: DALY=disability-adjusted life year, GBD=Global Burden of Disease.

Values shown in brackets represent the ratio of observed DALYs to predicted DALYs on the basis of Socio-Demographic Index (SDI), rounded to two (2) digits. Color ranges (shown below) were calculated to place a roughly equal number of cells into each bin.

| COLOR KEY: |                    | [0.0-0.5]            | [0.5-0.69]           | [0.69-0.82]          | [0.82-0.92]         | [0.92-1.01]       | [1.01-1.18]       | [1.18-1.48]        | [1.48-2.26]          | 2.26+                |
|------------|--------------------|----------------------|----------------------|----------------------|---------------------|-------------------|-------------------|--------------------|----------------------|----------------------|
|            | 1                  | 2                    | 3                    | 4                    | 5                   | 6                 | 7                 | 8                  | 9                    | 10                   |
| Kagawa     | Neonatal<br>[0.4]  | Congenital<br>[0.44] | Dermatitis<br>[1.26] | Back Pain<br>[1.28]  | Headaches<br>[0.74] | Conduct<br>[1.04] | Anxiety<br>[0.81] | Road Inj<br>[0.47] | Falls<br>[1.14]      | Depression<br>[0.91] |
| Kagoshima  | Neonatal<br>[0.36] | Congenital<br>[0.45] | Dermatitis<br>[1.29] | Back Pain<br>[1.23]  | Headaches<br>[0.7]  | Conduct<br>[1.0]  | Anxiety<br>[0.79] | Falls<br>[1.14]    | Road Inj<br>[0.32]   | Asthma<br>[0.78]     |
| Kanagawa   | Neonatal<br>[0.51] | Congenital<br>[0.61] | Dermatitis<br>[1.27] | Back Pain<br>[1.26]  | Headaches<br>[0.73] | Conduct<br>[1.03] | Anxiety<br>[0.77] | Falls<br>[1.11]    | Depression<br>[0.95] | Asthma<br>[0.83]     |
| Kochi      | Neonatal<br>[0.38] | Congenital<br>[0.43] | Dermatitis<br>[1.26] | Back Pain<br>[1.32]  | Headaches<br>[0.74] | Conduct<br>[1.03] | Anxiety<br>[0.83] | Falls<br>[1.2]     | Depression<br>[0.94] | Road Inj<br>[0.36]   |
| Kumamoto   | Neonatal<br>[0.34] | Congenital<br>[0.38] | Dermatitis<br>[1.29] | Back Pain<br>[1.23]  | Headaches<br>[0.69] | Conduct<br>[0.99] | Anxiety<br>[0.79] | Falls<br>[1.13]    | Depression<br>[0.86] | Asthma<br>[0.79]     |
| Kyoto      | Neonatal<br>[0.52] | Congenital<br>[0.64] | Back Pain<br>[1.34]  | Dermatitis<br>[0.99] | Headaches<br>[0.76] | Conduct<br>[1.05] | Anxiety<br>[0.79] | Falls<br>[1.11]    | Depression<br>[0.97] | Asthma<br>[0.81]     |
| Mie        | Neonatal<br>[0.47] | Congenital<br>[0.46] | Dermatitis<br>[1.27] | Back Pain<br>[1.28]  | Headaches<br>[0.73] | Conduct<br>[1.03] | Anxiety<br>[0.8]  | Falls<br>[1.13]    | Road Inj<br>[0.41]   | Depression<br>[0.9]  |
| Miyagi     | Neonatal<br>[0.43] | Congenital<br>[0.53] | Dermatitis<br>[1.26] | Back Pain<br>[1.32]  | Headaches<br>[0.74] | Conduct<br>[1.03] | Anxiety<br>[0.8]  | Falls<br>[1.14]    | Depression<br>[0.99] | Road Inj<br>[0.32]   |
| Miyazaki   | Neonatal<br>[0.35] | Congenital<br>[0.41] | Dermatitis<br>[1.29] | Back Pain<br>[1.25]  | Headaches<br>[0.7]  | Conduct<br>[1.0]  | Anxiety<br>[0.8]  | Falls<br>[1.15]    | Depression<br>[0.9]  | Iron<br>[3.0]        |
| Nagano     | Neonatal<br>[0.41] | Congenital<br>[0.4]  | Dermatitis<br>[1.26] | Back Pain<br>[1.3]   | Headaches<br>[0.74] | Conduct<br>[1.04] | Anxiety<br>[0.8]  | Falls<br>[1.15]    | Depression<br>[0.93] | Road Inj<br>[0.34]   |
| Nagasaki   | Neonatal<br>[0.35] | Congenital<br>[0.43] | Dermatitis<br>[1.28] | Back Pain<br>[1.25]  | Headaches<br>[0.72] | Conduct<br>[1.0]  | Anxiety<br>[0.81] | Falls<br>[1.15]    | Depression<br>[0.89] | Asthma<br>[0.78]     |
| Nara       | Neonatal<br>[0.38] | Congenital<br>[0.51] | Dermatitis<br>[1.26] | Back Pain<br>[1.37]  | Headaches<br>[0.76] | Conduct<br>[1.05] | Anxiety<br>[0.82] | Falls<br>[1.17]    | Depression<br>[0.95] | Road Inj<br>[0.34]   |
| Niigata    | Neonatal<br>[0.41] | Congenital<br>[0.45] | Dermatitis<br>[1.26] | Back Pain<br>[1.47]  | Headaches<br>[0.74] | Conduct<br>[1.03] | Anxiety<br>[0.81] | Falls<br>[1.14]    | Depression<br>[0.99] | Asthma<br>[0.79]     |
| Oita       | Neonatal<br>[0.45] | Congenital<br>[0.45] | Dermatitis<br>[1.27] | Back Pain<br>[1.26]  | Headaches<br>[0.72] | Conduct<br>[1.02] | Anxiety<br>[0.79] | Falls<br>[1.14]    | Depression<br>[0.91] | Road Inj<br>[0.34]   |
| Okayama    | Neonatal<br>[0.43] | Congenital<br>[0.42] | Dermatitis<br>[1.26] | Back Pain<br>[1.29]  | Headaches<br>[0.74] | Conduct<br>[1.03] | Anxiety<br>[0.79] | Falls<br>[1.12]    | Depression<br>[0.91] | Road Inj<br>[0.33]   |
| Okinawa    | Neonatal<br>[0.36] | Congenital<br>[0.35] | Dermatitis<br>[1.3]  | Back Pain<br>[1.19]  | Headaches<br>[0.68] | Conduct<br>[0.96] | Anxiety<br>[0.78] | Falls<br>[1.12]    | Depression<br>[0.84] | Road Inj<br>[0.28]   |
| Osaka      | Neonatal<br>[0.45] | Congenital<br>[0.53] | Dermatitis<br>[1.26] | Back Pain<br>[1.3]   | Headaches<br>[0.74] | Conduct<br>[1.04] | Anxiety<br>[0.79] | Falls<br>[1.12]    | Depression<br>[0.98] | Asthma<br>[0.82]     |
| Saga       | Neonatal<br>[0.36] | Congenital<br>[0.35] | Dermatitis<br>[1.28] | Back Pain<br>[1.27]  | Headaches<br>[0.72] | Conduct<br>[1.01] | Anxiety<br>[0.8]  | Falls<br>[1.13]    | Road Inj<br>[0.35]   | Depression<br>[0.88] |
| Saitama    | Neonatal<br>[0.42] | Congenital<br>[0.49] | Dermatitis<br>[1.27] | Back Pain<br>[1.33]  | Headaches<br>[0.73] | Conduct<br>[1.02] | Anxiety<br>[0.8]  | Falls<br>[1.15]    | Depression<br>[0.96] | Asthma<br>[0.8]      |
| Shiga      | Neonatal<br>[0.46] | Congenital<br>[0.51] | Dermatitis<br>[1.55] | Back Pain<br>[1.27]  | Headaches<br>[0.73] | Conduct<br>[1.04] | Anxiety<br>[0.78] | Falls<br>[1.09]    | Depression<br>[0.89] | Road Inj<br>[0.34]   |
| Shimane    | Neonatal<br>[0.35] | Congenital<br>[0.36] | Dermatitis<br>[1.27] | Back Pain<br>[1.19]  | Headaches<br>[0.71] | Conduct<br>[1.02] | Anxiety<br>[0.8]  | Falls<br>[1.14]    | Depression<br>[0.93] | Asthma<br>[0.77]     |
| Shizuoka   | Neonatal<br>[0.47] | Congenital<br>[0.46] | Dermatitis<br>[1.27] | Back Pain<br>[1.25]  | Headaches<br>[0.72] | Conduct<br>[1.03] | Anxiety<br>[0.79] | Falls<br>[1.11]    | Depression<br>[0.9]  | Asthma<br>[0.8]      |
| Tochigi    | Neonatal<br>[0.47] | Congenital<br>[0.6]  | Dermatitis<br>[1.27] | Back Pain<br>[1.29]  | Headaches<br>[0.73] | Conduct<br>[1.03] | Anxiety<br>[0.79] | Falls<br>[1.12]    | Road Inj<br>[0.43]   | Depression<br>[0.91] |
| Tokushima  | Neonatal<br>[0.51] | Congenital<br>[0.58] | Dermatitis<br>[1.26] | Back Pain<br>[1.29]  | Headaches<br>[0.74] | Conduct<br>[1.02] | Anxiety<br>[0.81] | Falls<br>[1.16]    | Road Inj<br>[0.41]   | Depression<br>[0.93] |
| Tokyo      | Neonatal<br>[0.69] | Congenital<br>[0.9]  | Dermatitis<br>[1.31] | Back Pain<br>[1.19]  | Headaches<br>[0.71] | Conduct<br>[1.02] | Anxiety<br>[0.71] | Falls<br>[1.01]    | Depression<br>[0.83] | Asthma<br>[0.88]     |
| Tottori    | Neonatal<br>[0.42] | Congenital<br>[0.49] | Dermatitis<br>[1.28] | Back Pain<br>[1.26]  | Headaches<br>[0.67] | Conduct<br>[1.01] | Anxiety<br>[0.8]  | Falls<br>[1.15]    | Road Inj<br>[0.38]   | Depression<br>[0.9]  |
| Toyama     | Neonatal<br>[0.43] | Congenital<br>[0.49] | Dermatitis<br>[1.26] | Back Pain<br>[1.28]  | Headaches<br>[0.73] | Conduct<br>[1.05] | Anxiety<br>[0.8]  | Falls<br>[1.13]    | Road Inj<br>[0.39]   | Depression<br>[0.93] |
| Wakayama   | Neonatal<br>[0.42] | Congenital<br>[0.41] | Back Pain<br>[1.48]  | Dermatitis<br>[1.26] | Headaches<br>[0.73] | Conduct<br>[1.03] | Anxiety<br>[0.81] | Falls<br>[1.14]    | Depression<br>[0.94] | Asthma<br>[0.78]     |
| Yamagata   | Neonatal<br>[0.38] | Congenital<br>[0.46] | Dermatitis<br>[1.26] | Back Pain<br>[1.34]  | Headaches<br>[0.74] | Conduct<br>[1.04] | Anxiety<br>[0.83] | Falls<br>[1.17]    | Depression<br>[0.92] | Iron<br>[2.93]       |
| Yamaguchi  | Neonatal<br>[0.4]  | Congenital<br>[0.44] | Dermatitis<br>[1.27] | Back Pain<br>[1.28]  | Headaches<br>[0.73] | Conduct<br>[1.03] | Anxiety<br>[0.8]  | Falls<br>[1.13]    | Depression<br>[0.92] | Road Inj<br>[0.34]   |
| Yamanashi  | Neonatal<br>[0.45] | Congenital<br>[0.44] | Dermatitis<br>[1.24] | Back Pain<br>[1.36]  | Headaches<br>[0.76] | Conduct<br>[1.07] | Anxiety<br>[0.82] | Falls<br>[1.15]    | Depression<br>[0.96] | Road Inj<br>[0.34]   |

**eFigure 7a. Leading ten causes of DALYs with the ratio of observed DALYs to DALYs expected on the basis of Socio-Demographic Index alone in 2017, <20 years, both sexes combined.** The top ten causes contributing to DALYs are listed globally, by socio-demographic quintile, and then by GBD superregion, region, country, and subnationally where modeled. For each cell, the ratio of observed DALYs to DALYs expected on the basis of socio-demographic index (SDI) alone are listed. Abbreviations: DALY=disability-adjusted life year, GBD=Global Burden of Disease.

Values shown in brackets represent the ratio of observed DALYs to predicted DALYs on the basis of Socio-Demographic Index (SDI), rounded to two (2) digits. Color ranges (shown below) were calculated to place a roughly equal number of cells into each bin.

| COLOR KEY:                |                    | [0.0-0.5]            | [0.5-0.69]           | [0.69-0.82]          | [0.82-0.92]          | [0.92-1.01]          | [1.01-1.18]          | [1.18-1.48]          | [1.48-2.26]          | 2.26+                |
|---------------------------|--------------------|----------------------|----------------------|----------------------|----------------------|----------------------|----------------------|----------------------|----------------------|----------------------|
|                           | 1                  | 2                    | 3                    | 4                    | 5                    | 6                    | 7                    | 8                    | 9                    | 10                   |
| S Korea                   | Neonatal<br>[0.74] | Congenital<br>[0.42] | Headaches<br>[0.89]  | Dermatitis<br>[1.08] | Back Pain<br>[1.08]  | Anxiety<br>[0.85]    | Road Inj<br>[0.46]   | Conduct<br>[0.9]     | Depression<br>[0.99] | Falls<br>[0.98]      |
| Singapore                 | Neonatal<br>[0.48] | Congenital<br>[0.4]  | Dermatitis<br>[1.02] | Headaches<br>[0.71]  | Depression<br>[1.2]  | Anxiety<br>[0.8]     | Back Pain<br>[0.88]  | Conduct<br>[0.87]    | Falls<br>[0.98]      | Asthma<br>[0.79]     |
| High-income North America | Neonatal<br>[1.1]  | Congenital<br>[0.78] | Drugs<br>[5.28]      | Road Inj<br>[0.82]   | Dermatitis<br>[1.34] | Headaches<br>[1.01]  | Depression<br>[1.77] | Anxiety<br>[1.01]    | Conduct<br>[1.19]    | Asthma<br>[1.2]      |
| Canada                    | Neonatal<br>[0.96] | Congenital<br>[0.78] | Dermatitis<br>[1.45] | Headaches<br>[1.0]   | Drugs<br>[4.05]      | Road Inj<br>[0.66]   | Depression<br>[1.28] | Asthma<br>[1.28]     | Anxiety<br>[0.8]     | Conduct<br>[0.98]    |
| Greenland                 | Neonatal<br>[1.19] | Self Harm<br>[6.42]  | Congenital<br>[0.7]  | Depression<br>[2.35] | Violence<br>[3.53]   | Dermatitis<br>[1.39] | SIDS<br>[2.74]       | Headaches<br>[0.97]  | Drown<br>[1.61]      | LRI<br>[0.83]        |
| USA                       | Neonatal<br>[1.09] | Congenital<br>[0.77] | Drugs<br>[5.43]      | Road Inj<br>[0.83]   | Dermatitis<br>[1.33] | Depression<br>[1.82] | Headaches<br>[1.01]  | Anxiety<br>[1.03]    | Conduct<br>[1.21]    | Violence<br>[3.48]   |
| Alabama                   | Neonatal<br>[1.23] | Congenital<br>[0.83] | Road Inj<br>[1.37]   | Drugs<br>[6.93]      | Headaches<br>[1.04]  | Violence<br>[4.45]   | Depression<br>[1.82] | Dermatitis<br>[1.16] | Anxiety<br>[1.08]    | SIDS<br>[2.21]       |
| Alaska                    | Neonatal<br>[0.82] | Congenital<br>[0.73] | Drugs<br>[5.68]      | Headaches<br>[0.95]  | Depression<br>[1.71] | Dermatitis<br>[1.2]  | Self Harm<br>[1.95]  | Road Inj<br>[0.68]   | Anxiety<br>[0.99]    | SIDS<br>[2.27]       |
| Arizona                   | Neonatal<br>[0.81] | Congenital<br>[0.68] | Drugs<br>[7.13]      | Depression<br>[2.1]  | Road Inj<br>[0.83]   | Dermatitis<br>[1.36] | Headaches<br>[1.03]  | Anxiety<br>[1.07]    | Conduct<br>[1.19]    | Asthma<br>[1.26]     |
| Arkansas                  | Neonatal<br>[0.88] | Congenital<br>[0.73] | Road Inj<br>[1.28]   | Drugs<br>[6.45]      | Depression<br>[2.11] | Headaches<br>[1.02]  | SIDS<br>[2.7]        | Anxiety<br>[1.08]    | Violence<br>[3.46]   | Dermatitis<br>[1.07] |
| California                | Neonatal<br>[0.89] | Congenital<br>[0.71] | Dermatitis<br>[1.49] | Headaches<br>[1.02]  | Depression<br>[1.76] | Drugs<br>[3.9]       | Anxiety<br>[1.0]     | Road Inj<br>[0.61]   | Conduct<br>[1.2]     | Violence<br>[3.61]   |
| Colorado                  | Neonatal<br>[1.09] | Congenital<br>[0.78] | Depression<br>[2.02] | Drugs<br>[4.73]      | Headaches<br>[1.03]  | Road Inj<br>[0.77]   | Dermatitis<br>[1.19] | Anxiety<br>[1.02]    | Self Harm<br>[1.75]  | Conduct<br>[1.22]    |
| Connecticut               | Neonatal<br>[1.3]  | Drugs<br>[6.52]      | Congenital<br>[0.65] | Dermatitis<br>[1.49] | Headaches<br>[1.07]  | Depression<br>[1.67] | Anxiety<br>[1.03]    | Asthma<br>[1.53]     | Conduct<br>[1.25]    | Road Inj<br>[0.63]   |
| Delaware                  | Neonatal<br>[1.6]  | Congenital<br>[0.86] | Drugs<br>[7.28]      | Road Inj<br>[0.9]    | Depression<br>[1.92] | Headaches<br>[1.04]  | Dermatitis<br>[1.19] | Anxiety<br>[1.04]    | Conduct<br>[1.2]     | Asthma<br>[1.28]     |
| DC                        | Neonatal<br>[3.43] | Congenital<br>[1.73] | Violence<br>[17.47]  | SIDS<br>[4.38]       | Dermatitis<br>[1.85] | Drugs<br>[4.46]      | F Body<br>[5.64]     | Headaches<br>[0.89]  | LRI<br>[4.78]        | Road Inj<br>[0.61]   |
| Florida                   | Neonatal<br>[1.24] | Congenital<br>[0.81] | Drugs<br>[5.74]      | Road Inj<br>[0.91]   | Dermatitis<br>[1.31] | Headaches<br>[1.03]  | Depression<br>[1.8]  | Anxiety<br>[1.04]    | Violence<br>[4.31]   | Conduct<br>[1.2]     |
| Georgia                   | Neonatal<br>[1.15] | Congenital<br>[0.73] | Road Inj<br>[0.97]   | Drugs<br>[5.23]      | Dermatitis<br>[1.43] | Headaches<br>[1.04]  | Depression<br>[1.76] | Violence<br>[4.13]   | Anxiety<br>[1.06]    | Conduct<br>[1.2]     |
| Hawaii                    | Neonatal<br>[1.17] | Congenital<br>[0.73] | Dermatitis<br>[1.58] | Headaches<br>[0.97]  | Depression<br>[1.71] | Road Inj<br>[0.64]   | Anxiety<br>[0.99]    | Conduct<br>[1.16]    | Asthma<br>[1.28]     | Drugs<br>[2.61]      |
| Idaho                     | Neonatal<br>[0.67] | Congenital<br>[0.57] | Road Inj<br>[0.89]   | Drugs<br>[5.29]      | Depression<br>[2.02] | Headaches<br>[1.01]  | Dermatitis<br>[1.1]  | Anxiety<br>[1.06]    | Conduct<br>[1.19]    | Self Harm<br>[1.57]  |
| Illinois                  | Neonatal<br>[1.31] | Congenital<br>[0.8]  | Drugs<br>[4.74]      | Headaches<br>[1.03]  | Violence<br>[5.54]   | Depression<br>[1.67] | Dermatitis<br>[1.16] | Anxiety<br>[1.03]    | Road Inj<br>[0.66]   | Conduct<br>[1.21]    |
| Indiana                   | Neonatal<br>[1.06] | Congenital<br>[0.82] | Drugs<br>[6.73]      | Road Inj<br>[0.95]   | Depression<br>[1.94] | Headaches<br>[1.02]  | Dermatitis<br>[1.15] | Anxiety<br>[1.06]    | Conduct<br>[1.19]    | Violence<br>[3.5]    |
| Iowa                      | Neonatal<br>[0.75] | Congenital<br>[0.68] | Road Inj<br>[0.88]   | Headaches<br>[1.01]  | Back Pain<br>[1.44]  | Depression<br>[1.71] | Anxiety<br>[1.03]    | Dermatitis<br>[1.05] | Conduct<br>[1.19]    | Drugs<br>[2.78]      |
| Kansas                    | Neonatal<br>[0.97] | Congenital<br>[0.75] | Road Inj<br>[1.0]    | Depression<br>[1.8]  | Headaches<br>[1.0]   | Dermatitis<br>[1.11] | Anxiety<br>[1.02]    | Conduct<br>[1.19]    | Drugs<br>[3.48]      | Back Pain<br>[1.11]  |
| Kentucky                  | Neonatal<br>[0.91] | Congenital<br>[0.77] | Drugs<br>[9.9]       | Road Inj<br>[1.08]   | Depression<br>[1.94] | Headaches<br>[1.01]  | Dermatitis<br>[1.17] | Anxiety<br>[1.07]    | SIDS<br>[2.19]       | Conduct<br>[1.17]    |
| Louisiana                 | Neonatal<br>[1.16] | Congenital<br>[0.85] | Road Inj<br>[1.13]   | Violence<br>[6.42]   | Drugs<br>[6.96]      | Headaches<br>[0.99]  | Dermatitis<br>[1.26] | Depression<br>[1.69] | Anxiety<br>[1.04]    | SIDS<br>[2.23]       |
| Maine                     | Neonatal<br>[1.15] | Congenital<br>[0.89] | Drugs<br>[7.5]       | Road Inj<br>[1.01]   | Depression<br>[1.97] | Headaches<br>[1.06]  | Anxiety<br>[1.06]    | Conduct<br>[1.23]    | Dermatitis<br>[0.99] | Asthma<br>[1.3]      |
| Maryland                  | Neonatal<br>[1.65] | Congenital<br>[0.88] | Dermatitis<br>[1.51] | Headaches<br>[1.01]  | Violence<br>[5.85]   | Depression<br>[1.7]  | Road Inj<br>[0.73]   | Drugs<br>[3.84]      | Anxiety<br>[1.0]     | Conduct<br>[1.21]    |
| Massachusetts             | Neonatal<br>[1.39] | Congenital<br>[0.8]  | Drugs<br>[6.42]      | Dermatitis<br>[1.35] | Headaches<br>[1.06]  | Depression<br>[1.79] | Anxiety<br>[1.01]    | Conduct<br>[1.24]    | Asthma<br>[1.34]     | Road Inj<br>[0.56]   |
| Michigan                  | Neonatal<br>[1.24] | Congenital<br>[0.82] | Drugs<br>[6.46]      | Depression<br>[1.92] | Road Inj<br>[0.81]   | Dermatitis<br>[1.19] | Anxiety<br>[1.05]    | Headaches<br>[0.85]  | Violence<br>[4.22]   | Conduct<br>[1.21]    |
| Minnesota                 | Neonatal<br>[1.04] | Congenital<br>[0.87] | Headaches<br>[1.01]  | Depression<br>[1.74] | Anxiety<br>[1.0]     | Dermatitis<br>[1.05] | Road Inj<br>[0.66]   | Conduct<br>[1.21]    | Drugs<br>[2.68]      | Self Harm<br>[1.28]  |
| Mississippi               | Neonatal<br>[1.12] | Congenital<br>[0.81] | Road Inj<br>[1.58]   | Drugs<br>[6.45]      | Violence<br>[4.22]   | Headaches<br>[1.03]  | Depression<br>[1.77] | Anxiety<br>[1.1]     | Dermatitis<br>[1.06] | F Body<br>[3.19]     |

**eFigure 7a. Leading ten causes of DALYs with the ratio of observed DALYs to DALYs expected on the basis of Socio-Demographic Index alone in 2017, <20 years, both sexes combined.** The top ten causes contributing to DALYs are listed globally, by socio-demographic quintile, and then by GBD superregion, region, country, and subnationally where modeled. For each cell, the ratio of observed DALYs to DALYs expected on the basis of socio-demographic index (SDI) alone are listed. Abbreviations: DALY=disability-adjusted life year, GBD=Global Burden of Disease.

Values shown in brackets represent the ratio of observed DALYs to predicted DALYs on the basis of Socio-Demographic Index (SDI), rounded to two (2) digits. Color ranges (shown below) were calculated to place a roughly equal number of cells into each bin.

| COLOR KEY:             |                    | [0.0-0.5]            | [0.5-0.69]           | [0.69-0.82]          | [0.82-0.92]          | [0.92-1.01]          | [1.01-1.18]          | [1.18-1.48]          | [1.48-2.26]          | 2.26+               |
|------------------------|--------------------|----------------------|----------------------|----------------------|----------------------|----------------------|----------------------|----------------------|----------------------|---------------------|
|                        | 1                  | 2                    | 3                    | 4                    | 5                    | 6                    | 7                    | 8                    | 9                    | 10                  |
| Missouri               | Neonatal<br>[1.04] | Congenital<br>[0.77] | Road Inj<br>[1.04]   | Drugs<br>[5.85]      | Depression<br>[1.94] | Headaches<br>[1.01]  | Violence<br>[4.34]   | Anxiety<br>[1.04]    | Dermatitis<br>[1.07] | Conduct<br>[1.18]   |
| Montana                | Neonatal<br>[0.92] | Congenital<br>[0.85] | Road Inj<br>[1.45]   | Drugs<br>[5.27]      | Depression<br>[1.87] | Headaches<br>[0.99]  | Self Harm<br>[2.03]  | Anxiety<br>[1.02]    | Dermatitis<br>[1.05] | Conduct<br>[1.18]   |
| Nebraska               | Neonatal<br>[0.94] | Congenital<br>[0.78] | Road Inj<br>[1.0]    | Headaches<br>[0.99]  | Depression<br>[1.65] | Dermatitis<br>[1.06] | Anxiety<br>[1.0]     | Back Pain<br>[1.19]  | Conduct<br>[1.18]    | Drugs<br>[2.7]      |
| Nevada                 | Neonatal<br>[0.83] | Congenital<br>[0.64] | Drugs<br>[7.15]      | Road Inj<br>[0.8]    | Depression<br>[1.88] | Dermatitis<br>[1.3]  | Headaches<br>[1.0]   | Violence<br>[3.95]   | Anxiety<br>[1.04]    | Conduct<br>[1.17]   |
| New Hampshire          | Neonatal<br>[1.07] | Drugs<br>[7.55]      | Congenital<br>[0.74] | Depression<br>[2.06] | Headaches<br>[1.08]  | Road Inj<br>[0.74]   | Anxiety<br>[1.04]    | Dermatitis<br>[1.04] | Conduct<br>[1.27]    | Asthma<br>[1.2]     |
| New Jersey             | Neonatal<br>[1.14] | Congenital<br>[0.73] | Dermatitis<br>[1.62] | Drugs<br>[5.16]      | Headaches<br>[1.03]  | Depression<br>[1.53] | Anxiety<br>[1.01]    | Asthma<br>[1.53]     | Conduct<br>[1.22]    | Road Inj<br>[0.53]  |
| New Mexico             | Neonatal<br>[0.79] | Congenital<br>[0.67] | Road Inj<br>[1.04]   | Drugs<br>[6.65]      | Depression<br>[2.11] | Headaches<br>[1.02]  | Dermatitis<br>[1.17] | Anxiety<br>[1.08]    | Self Harm<br>[1.7]   | Conduct<br>[1.19]   |
| New York               | Neonatal<br>[1.26] | Congenital<br>[0.83] | Dermatitis<br>[1.68] | Depression<br>[1.84] | Drugs<br>[4.49]      | Headaches<br>[1.01]  | Asthma<br>[1.68]     | Anxiety<br>[0.99]    | Conduct<br>[1.19]    | Road Inj<br>[0.51]  |
| N Carolina             | Neonatal<br>[1.18] | Congenital<br>[0.75] | Road Inj<br>[0.97]   | Drugs<br>[5.63]      | Headaches<br>[1.03]  | Depression<br>[1.79] | Dermatitis<br>[1.23] | Anxiety<br>[0.99]    | Conduct<br>[1.11]    | Violence<br>[3.27]  |
| N Dakota               | Neonatal<br>[1.19] | Congenital<br>[1.06] | Road Inj<br>[1.19]   | Headaches<br>[0.93]  | Depression<br>[1.49] | SIDS<br>[2.4]        | Dermatitis<br>[1.04] | Anxiety<br>[0.94]    | Conduct<br>[1.12]    | Self Harm<br>[1.51] |
| Ohio                   | Neonatal<br>[1.22] | Congenital<br>[0.86] | Drugs<br>[7.92]      | Road Inj<br>[0.78]   | Depression<br>[1.86] | Headaches<br>[1.03]  | Dermatitis<br>[1.26] | Anxiety<br>[1.05]    | Conduct<br>[1.19]    | Violence<br>[3.41]  |
| Oklahoma               | Neonatal<br>[1.07] | Congenital<br>[0.9]  | Road Inj<br>[1.25]   | Drugs<br>[7.8]       | Depression<br>[1.9]  | Dermatitis<br>[1.32] | Headaches<br>[1.01]  | Anxiety<br>[1.05]    | Violence<br>[3.57]   | SIDS<br>[2.14]      |
| Oregon                 | Neonatal<br>[0.98] | Congenital<br>[0.7]  | Drugs<br>[6.53]      | Depression<br>[1.99] | Dermatitis<br>[1.39] | Headaches<br>[1.02]  | Road Inj<br>[0.67]   | Anxiety<br>[0.95]    | Conduct<br>[1.08]    | Self Harm<br>[1.36] |
| Pennsylvania           | Neonatal<br>[1.32] | Congenital<br>[0.81] | Drugs<br>[7.79]      | Dermatitis<br>[1.3]  | Depression<br>[1.8]  | Road Inj<br>[0.78]   | Headaches<br>[0.94]  | Anxiety<br>[1.03]    | Conduct<br>[1.21]    | Back Pain<br>[1.05] |
| Rhode Island           | Neonatal<br>[1.46] | Drugs<br>[8.15]      | Congenital<br>[0.81] | Depression<br>[2.02] | Headaches<br>[1.07]  | Dermatitis<br>[1.18] | Anxiety<br>[1.04]    | Conduct<br>[1.23]    | Road Inj<br>[0.57]   | Asthma<br>[1.26]    |
| S Carolina             | Neonatal<br>[1.16] | Congenital<br>[0.71] | Road Inj<br>[1.22]   | Drugs<br>[6.64]      | Dermatitis<br>[1.42] | Depression<br>[1.88] | Headaches<br>[1.03]  | Anxiety<br>[1.07]    | Violence<br>[3.82]   | Conduct<br>[1.19]   |
| S Dakota               | Neonatal<br>[0.91] | Congenital<br>[0.87] | Road Inj<br>[1.37]   | Headaches<br>[0.96]  | Self Harm<br>[1.83]  | Depression<br>[1.52] | Dermatitis<br>[1.03] | Anxiety<br>[1.0]     | Back Pain<br>[1.17]  | Conduct<br>[1.16]   |
| Tennessee              | Neonatal<br>[0.94] | Congenital<br>[0.77] | Drugs<br>[8.1]       | Road Inj<br>[0.99]   | Depression<br>[1.9]  | Headaches<br>[1.02]  | Dermatitis<br>[1.18] | Violence<br>[3.77]   | Anxiety<br>[1.06]    | Conduct<br>[1.17]   |
| Texas                  | Neonatal<br>[0.88] | Congenital<br>[0.69] | Road Inj<br>[0.89]   | Dermatitis<br>[1.39] | Headaches<br>[1.01]  | Depression<br>[1.76] | Conduct<br>[1.36]    | Anxiety<br>[1.06]    | Drugs<br>[3.73]      | Violence<br>[2.99]  |
| Utah                   | Neonatal<br>[0.71] | Congenital<br>[0.63] | Drugs<br>[6.0]       | Depression<br>[2.14] | Headaches<br>[1.0]   | Road Inj<br>[0.67]   | Dermatitis<br>[1.12] | Self Harm<br>[1.86]  | Anxiety<br>[1.03]    | Conduct<br>[1.18]   |
| Vermont                | Neonatal<br>[1.08] | Congenital<br>[0.79] | Drugs<br>[5.68]      | Headaches<br>[1.08]  | Depression<br>[1.91] | Road Inj<br>[0.85]   | Anxiety<br>[1.05]    | Dermatitis<br>[1.02] | Conduct<br>[1.26]    | Asthma<br>[1.08]    |
| Virginia               | Neonatal<br>[1.29] | Congenital<br>[0.82] | Dermatitis<br>[1.51] | Depression<br>[1.9]  | Headaches<br>[1.02]  | Drugs<br>[4.34]      | Road Inj<br>[0.75]   | Anxiety<br>[1.01]    | Conduct<br>[1.2]     | Asthma<br>[1.21]    |
| Washington             | Neonatal<br>[0.95] | Congenital<br>[0.78] | Drugs<br>[5.22]      | Dermatitis<br>[1.36] | Depression<br>[1.92] | Headaches<br>[1.0]   | Anxiety<br>[1.0]     | Road Inj<br>[0.6]    | Conduct<br>[1.19]    | Self Harm<br>[1.26] |
| W Virginia             | Neonatal<br>[0.96] | Drugs<br>[12.77]     | Congenital<br>[0.77] | Road Inj<br>[1.16]   | Depression<br>[1.97] | Headaches<br>[1.02]  | Dermatitis<br>[1.19] | Anxiety<br>[1.08]    | SIDS<br>[2.23]       | Conduct<br>[1.17]   |
| Wisconsin              | Neonatal<br>[1.12] | Congenital<br>[0.79] | Drugs<br>[5.47]      | Depression<br>[1.92] | Headaches<br>[1.03]  | Road Inj<br>[0.75]   | Anxiety<br>[1.03]    | Dermatitis<br>[1.05] | Conduct<br>[1.21]    | Back Pain<br>[0.95] |
| Wyoming                | Neonatal<br>[1.04] | Congenital<br>[0.75] | Road Inj<br>[1.27]   | Depression<br>[1.98] | Headaches<br>[0.99]  | Self Harm<br>[1.96]  | Drugs<br>[3.97]      | Dermatitis<br>[1.1]  | Anxiety<br>[1.01]    | Back Pain<br>[1.13] |
| Southern Latin America | Neonatal<br>[0.75] | Congenital<br>[0.71] | Road Inj<br>[0.6]    | Anxiety<br>[1.34]    | LRI<br>[0.48]        | Back Pain<br>[1.3]   | Diarrhea<br>[1.54]   | Dermatitis<br>[1.03] | Depression<br>[1.33] | Self Harm<br>[1.3]  |
| Argentina              | Neonatal<br>[0.79] | Congenital<br>[0.69] | Road Inj<br>[0.63]   | LRI<br>[0.51]        | Anxiety<br>[1.35]    | Diarrhea<br>[1.54]   | Self Harm<br>[1.43]  | Dermatitis<br>[0.97] | Back Pain<br>[1.17]  | Depression<br>[1.3] |
| Chile                  | Neonatal<br>[0.64] | Congenital<br>[0.77] | Back Pain<br>[1.71]  | Anxiety<br>[1.3]     | Dermatitis<br>[1.21] | Road Inj<br>[0.47]   | Depression<br>[1.46] | Headaches<br>[0.69]  | Diarrhea<br>[1.53]   | Conduct<br>[0.9]    |
| Uruguay                | Neonatal<br>[0.56] | Congenital<br>[0.64] | Road Inj<br>[0.59]   | Anxiety<br>[1.4]     | LRI<br>[0.37]        | Dermatitis<br>[0.95] | Headaches<br>[0.67]  | Self Harm<br>[1.27]  | Back Pain<br>[1.07]  | Asthma<br>[1.01]    |
| Western Europe         | Neonatal<br>[0.67] | Congenital<br>[0.57] | Anxiety<br>[1.23]    | Headaches<br>[0.97]  | Dermatitis<br>[1.12] | Back Pain<br>[1.08]  | Depression<br>[1.08] | Conduct<br>[0.91]    | Asthma<br>[0.95]     | Road Inj<br>[0.37]  |

**eFigure 7a. Leading ten causes of DALYs with the ratio of observed DALYs to DALYs expected on the basis of Socio-Demographic Index alone in 2017, <20 years, both sexes combined.** The top ten causes contributing to DALYs are listed globally, by socio-demographic quintile, and then by GBD superregion, region, country, and subnationally where modeled. For each cell, the ratio of observed DALYs to DALYs expected on the basis of socio-demographic index (SDI) alone are listed. Abbreviations: DALY=disability-adjusted life year, GBD=Global Burden of Disease.

Values shown in brackets represent the ratio of observed DALYs to predicted DALYs on the basis of Socio-Demographic Index (SDI), rounded to two (2) digits. Color ranges (shown below) were calculated to place a roughly equal number of cells into each bin.

| COLOR KEY:           |                    | [0.0-0.5]            | [0.5-0.69]           | [0.69-0.82]          | [0.82-0.92]          | [0.92-1.01]          | [1.01-1.18]          | [1.18-1.48]          | [1.48-2.26]          | 2.26+                |
|----------------------|--------------------|----------------------|----------------------|----------------------|----------------------|----------------------|----------------------|----------------------|----------------------|----------------------|
|                      | 1                  | 2                    | 3                    | 4                    | 5                    | 6                    | 7                    | 8                    | 9                    | 10                   |
| Andorra              | Neonatal<br>[0.48] | Dermatitis<br>[1.4]  | Headaches<br>[1.07]  | Anxiety<br>[1.21]    | Congenital<br>[0.44] | Back Pain<br>[1.1]   | Depression<br>[1.11] | Conduct<br>[0.98]    | Asthma<br>[1.13]     | Road Inj<br>[0.43]   |
| Austria              | Neonatal<br>[0.83] | Congenital<br>[0.64] | Headaches<br>[1.02]  | Anxiety<br>[1.17]    | Dermatitis<br>[0.76] | Back Pain<br>[0.85]  | Conduct<br>[0.89]    | Road Inj<br>[0.43]   | Falls<br>[0.87]      | Asthma<br>[0.83]     |
| Belgium              | Neonatal<br>[0.65] | Congenital<br>[0.59] | Headaches<br>[1.2]   | Anxiety<br>[1.1]     | Dermatitis<br>[0.96] | Back Pain<br>[0.92]  | Conduct<br>[0.89]    | Depression<br>[1.01] | Road Inj<br>[0.43]   | Falls<br>[0.93]      |
| Cyprus               | Neonatal<br>[0.72] | Congenital<br>[0.39] | Road Inj<br>[0.74]   | Headaches<br>[0.97]  | Anxiety<br>[1.15]    | Back Pain<br>[1.07]  | Dermatitis<br>[0.8]  | Conduct<br>[0.88]    | Depression<br>[0.98] | Asthma<br>[0.85]     |
| Denmark              | Neonatal<br>[0.89] | Congenital<br>[0.79] | Dermatitis<br>[1.32] | Anxiety<br>[1.15]    | Back Pain<br>[1.37]  | Headaches<br>[0.85]  | Conduct<br>[0.92]    | Asthma<br>[0.99]     | Road Inj<br>[0.39]   | Depression<br>[0.81] |
| Finland              | Neonatal<br>[0.82] | Congenital<br>[0.58] | Dermatitis<br>[1.39] | Headaches<br>[0.98]  | Depression<br>[1.34] | Anxiety<br>[0.83]    | Conduct<br>[0.89]    | Road Inj<br>[0.45]   | Asthma<br>[0.98]     | Falls<br>[0.86]      |
| France               | Neonatal<br>[0.65] | Congenital<br>[0.54] | Anxiety<br>[1.4]     | Dermatitis<br>[1.25] | Headaches<br>[0.81]  | Back Pain<br>[1.06]  | Depression<br>[1.12] | Conduct<br>[0.9]     | Road Inj<br>[0.43]   | Asthma<br>[0.93]     |
| Germany              | Neonatal<br>[0.79] | Congenital<br>[0.63] | Anxiety<br>[1.41]    | Back Pain<br>[1.41]  | Headaches<br>[0.88]  | Dermatitis<br>[0.92] | Depression<br>[1.06] | Conduct<br>[0.91]    | Road Inj<br>[0.42]   | Epilepsy<br>[1.8]    |
| Greece               | Neonatal<br>[0.55] | Congenital<br>[0.63] | Headaches<br>[1.18]  | Anxiety<br>[1.34]    | Road Inj<br>[0.61]   | Depression<br>[1.37] | Back Pain<br>[0.95]  | Conduct<br>[0.88]    | Dermatitis<br>[0.66] | Asthma<br>[0.78]     |
| Iceland              | Neonatal<br>[0.53] | Congenital<br>[0.56] | Dermatitis<br>[1.45] | Headaches<br>[0.97]  | Anxiety<br>[1.11]    | Asthma<br>[1.47]     | Back Pain<br>[0.98]  | Conduct<br>[0.9]     | Road Inj<br>[0.39]   | Depression<br>[0.85] |
| Ireland              | Neonatal<br>[0.63] | Congenital<br>[0.81] | Anxiety<br>[1.23]    | Dermatitis<br>[1.19] | Headaches<br>[0.94]  | Asthma<br>[1.28]     | Depression<br>[1.14] | Conduct<br>[0.88]    | Back Pain<br>[0.76]  | Falls<br>[0.8]       |
| Israel               | Neonatal<br>[0.56] | Congenital<br>[0.56] | Headaches<br>[0.88]  | Dermatitis<br>[1.06] | Back Pain<br>[1.05]  | Depression<br>[1.04] | Road Inj<br>[0.38]   | Blindness<br>[2.78]  | Anxiety<br>[0.69]    | Conduct<br>[0.81]    |
| Italy                | Neonatal<br>[0.52] | Congenital<br>[0.46] | Headaches<br>[1.24]  | Anxiety<br>[1.28]    | Dermatitis<br>[0.94] | Back Pain<br>[1.03]  | Depression<br>[1.11] | Conduct<br>[0.9]     | Road Inj<br>[0.38]   | Acne<br>[1.39]       |
| Luxembourg           | Neonatal<br>[0.73] | Headaches<br>[1.13]  | Dermatitis<br>[1.41] | Anxiety<br>[1.11]    | Congenital<br>[0.45] | Back Pain<br>[0.96]  | Asthma<br>[1.18]     | Road Inj<br>[0.5]    | Conduct<br>[0.91]    | Depression<br>[0.94] |
| Malta                | Neonatal<br>[0.88] | Congenital<br>[1.03] | Headaches<br>[0.97]  | Anxiety<br>[1.18]    | Back Pain<br>[1.08]  | Dermatitis<br>[0.82] | Conduct<br>[0.85]    | Depression<br>[1.0]  | Falls<br>[1.03]      | Asthma<br>[0.93]     |
| Netherlands          | Neonatal<br>[0.94] | Congenital<br>[0.77] | Anxiety<br>[1.41]    | Headaches<br>[1.08]  | Dermatitis<br>[1.22] | Conduct<br>[1.03]    | Depression<br>[1.11] | Back Pain<br>[0.81]  | Asthma<br>[1.04]     | Acne<br>[1.28]       |
| Norway               | Neonatal<br>[0.7]  | Congenital<br>[0.66] | Anxiety<br>[1.55]    | Dermatitis<br>[1.37] | Headaches<br>[1.03]  | Asthma<br>[1.39]     | Back Pain<br>[0.91]  | Conduct<br>[0.98]    | Falls<br>[0.97]      | Depression<br>[0.98] |
| Portugal             | Neonatal<br>[0.34] | Congenital<br>[0.31] | Headaches<br>[1.07]  | Anxiety<br>[1.35]    | Back Pain<br>[1.35]  | Asthma<br>[1.3]      | Depression<br>[1.4]  | Dermatitis<br>[0.86] | Conduct<br>[0.91]    | Road Inj<br>[0.35]   |
| Spain                | Neonatal<br>[0.48] | Congenital<br>[0.41] | Headaches<br>[1.15]  | Anxiety<br>[1.15]    | Back Pain<br>[1.15]  | Conduct<br>[0.88]    | Depression<br>[1.02] | Dermatitis<br>[0.71] | Asthma<br>[0.76]     | Road Inj<br>[0.29]   |
| Sweden               | Neonatal<br>[0.63] | Congenital<br>[0.65] | Dermatitis<br>[1.76] | Headaches<br>[0.99]  | Anxiety<br>[1.09]    | Asthma<br>[1.38]     | Depression<br>[1.13] | Conduct<br>[0.95]    | Back Pain<br>[0.85]  | Falls<br>[0.94]      |
| Stockholm            | Neonatal<br>[0.65] | Congenital<br>[0.82] | Dermatitis<br>[1.42] | Headaches<br>[0.95]  | Anxiety<br>[1.04]    | Asthma<br>[1.23]     | Conduct<br>[0.95]    | Falls<br>[0.88]      | Depression<br>[0.88] | Acne<br>[1.27]       |
| Sweden w/o Stockholm | Neonatal<br>[0.62] | Congenital<br>[0.6]  | Dermatitis<br>[1.86] | Headaches<br>[1.0]   | Anxiety<br>[1.11]    | Asthma<br>[1.43]     | Depression<br>[1.2]  | Back Pain<br>[0.95]  | Conduct<br>[0.95]    | Falls<br>[0.96]      |
| Switzerland          | Neonatal<br>[0.88] | Congenital<br>[0.81] | Back Pain<br>[1.96]  | Dermatitis<br>[1.41] | Anxiety<br>[1.12]    | Headaches<br>[0.81]  | Conduct<br>[0.89]    | Asthma<br>[0.97]     | Depression<br>[0.92] | Falls<br>[0.7]       |
| UK                   | Neonatal<br>[0.83] | Congenital<br>[0.65] | Dermatitis<br>[1.5]  | Headaches<br>[0.88]  | Asthma<br>[1.52]     | Anxiety<br>[1.0]     | Conduct<br>[0.94]    | Depression<br>[1.05] | Back Pain<br>[0.86]  | Falls<br>[0.84]      |
| England              | Neonatal<br>[0.88] | Congenital<br>[0.67] | Dermatitis<br>[1.53] | Headaches<br>[0.86]  | Asthma<br>[1.54]     | Anxiety<br>[0.97]    | Conduct<br>[0.95]    | Back Pain<br>[0.86]  | Depression<br>[1.03] | Falls<br>[0.82]      |
| E Midlands           | Neonatal<br>[0.81] | Congenital<br>[0.62] | Dermatitis<br>[1.5]  | Headaches<br>[0.88]  | Asthma<br>[1.45]     | Anxiety<br>[1.0]     | Conduct<br>[0.96]    | Back Pain<br>[0.88]  | Depression<br>[1.06] | Road Inj<br>[0.31]   |
| Derby                | Neonatal<br>[1.04] | Congenital<br>[0.78] | Dermatitis<br>[1.51] | Headaches<br>[0.84]  | Asthma<br>[1.45]     | Anxiety<br>[0.96]    | Conduct<br>[0.94]    | Back Pain<br>[0.85]  | Depression<br>[1.0]  | Falls<br>[0.84]      |
| Derbyshire           | Neonatal<br>[0.6]  | Congenital<br>[0.5]  | Dermatitis<br>[1.49] | Headaches<br>[0.9]   | Asthma<br>[1.43]     | Anxiety<br>[1.04]    | Conduct<br>[0.97]    | Depression<br>[1.09] | Back Pain<br>[0.8]   | Falls<br>[0.91]      |
| Leicester            | Neonatal<br>[1.12] | Congenital<br>[0.86] | Dermatitis<br>[1.5]  | Headaches<br>[0.86]  | Asthma<br>[1.47]     | Anxiety<br>[0.97]    | Conduct<br>[0.94]    | Back Pain<br>[0.88]  | Depression<br>[1.03] | Falls<br>[0.86]      |
| Leicestershire       | Neonatal<br>[0.76] | Congenital<br>[0.59] | Dermatitis<br>[1.48] | Headaches<br>[0.92]  | Anxiety<br>[1.01]    | Asthma<br>[1.45]     | Conduct<br>[0.99]    | Back Pain<br>[0.94]  | Depression<br>[1.1]  | Falls<br>[0.84]      |
| Lincolnshire         | Neonatal<br>[0.64] | Congenital<br>[0.52] | Dermatitis<br>[1.5]  | Headaches<br>[0.89]  | Asthma<br>[1.43]     | Anxiety<br>[1.03]    | Conduct<br>[0.95]    | Back Pain<br>[0.92]  | Road Inj<br>[0.4]    | Depression<br>[1.07] |

**Figure 7a. Leading ten causes of DALYs with the ratio of observed DALYs to DALYs expected on the basis of Socio-Demographic Index alone in 2017, <20 years, both sexes combined.** The top ten causes contributing to DALYs are listed globally, by socio-demographic quintile, and then by GBD superregion, region, country, and subnationally where modeled. For each cell, the ratio of observed DALYs to DALYs expected on the basis of socio-demographic index (SDI) alone are listed. Abbreviations: DALY=disability-adjusted life year, GBD=Global Burden of Disease.

Values shown in brackets represent the ratio of observed DALYs to predicted DALYs on the basis of Socio-Demographic Index (SDI), rounded to two (2) digits. Color ranges (shown below) were calculated to place a roughly equal number of cells into each bin.

| COLOR KEY:           |                    | [0.0-0.5]            | [0.5-0.69]           | [0.69-0.82]         | [0.82-0.92]         | [0.92-1.01]       | [1.01-1.18]         | [1.18-1.48]          | [1.48-2.26]          | 2.26+                |
|----------------------|--------------------|----------------------|----------------------|---------------------|---------------------|-------------------|---------------------|----------------------|----------------------|----------------------|
|                      | 1                  | 2                    | 3                    | 4                   | 5                   | 6                 | 7                   | 8                    | 9                    | 10                   |
| Northamptonshire     | Neonatal<br>[0.86] | Congenital<br>[0.62] | Dermatitis<br>[1.51] | Headaches<br>[0.85] | Asthma<br>[1.44]    | Anxiety<br>[0.98] | Conduct<br>[0.94]   | Back Pain<br>[0.87]  | Depression<br>[1.01] | Road Inj<br>[0.31]   |
| Nottingham           | Neonatal<br>[1.25] | Congenital<br>[0.86] | Dermatitis<br>[1.49] | Headaches<br>[0.9]  | Asthma<br>[1.53]    | Anxiety<br>[0.96] | Back Pain<br>[0.91] | Conduct<br>[0.96]    | Depression<br>[1.07] | Falls<br>[0.81]      |
| Nottinghamshire      | Neonatal<br>[0.73] | Congenital<br>[0.55] | Dermatitis<br>[1.5]  | Headaches<br>[0.87] | Asthma<br>[1.43]    | Anxiety<br>[1.01] | Conduct<br>[0.95]   | Back Pain<br>[0.9]   | Depression<br>[1.05] | Falls<br>[0.85]      |
| Rutland              | Neonatal<br>[0.37] | Congenital<br>[0.41] | Dermatitis<br>[1.45] | Headaches<br>[0.99] | Anxiety<br>[1.08]   | Asthma<br>[1.44]  | Back Pain<br>[1.02] | Conduct<br>[1.04]    | Depression<br>[1.2]  | Road Inj<br>[0.36]   |
| E England            | Neonatal<br>[0.71] | Congenital<br>[0.55] | Dermatitis<br>[1.5]  | Headaches<br>[0.87] | Asthma<br>[1.45]    | Anxiety<br>[0.98] | Conduct<br>[0.96]   | Back Pain<br>[0.87]  | Depression<br>[1.03] | Falls<br>[0.82]      |
| Bedford              | Neonatal<br>[0.9]  | Congenital<br>[0.65] | Dermatitis<br>[1.5]  | Headaches<br>[0.88] | Asthma<br>[1.45]    | Anxiety<br>[0.99] | Conduct<br>[0.96]   | Back Pain<br>[0.9]   | Depression<br>[1.05] | Falls<br>[0.83]      |
| Cambridgeshire       | Neonatal<br>[0.81] | Congenital<br>[0.61] | Dermatitis<br>[1.5]  | Headaches<br>[0.88] | Asthma<br>[1.49]    | Anxiety<br>[0.96] | Conduct<br>[0.98]   | Depression<br>[1.05] | Back Pain<br>[0.82]  | Falls<br>[0.8]       |
| Cen Bedfordshire     | Neonatal<br>[0.61] | Congenital<br>[0.49] | Dermatitis<br>[1.51] | Headaches<br>[0.85] | Asthma<br>[1.44]    | Anxiety<br>[0.98] | Conduct<br>[0.95]   | Back Pain<br>[0.86]  | Depression<br>[1.02] | Falls<br>[0.83]      |
| Essex                | Neonatal<br>[0.66] | Congenital<br>[0.5]  | Dermatitis<br>[1.5]  | Headaches<br>[0.88] | Asthma<br>[1.43]    | Anxiety<br>[1.01] | Conduct<br>[0.97]   | Back Pain<br>[0.89]  | Depression<br>[1.06] | Falls<br>[0.83]      |
| Hertfordshire        | Neonatal<br>[0.73] | Congenital<br>[0.55] | Dermatitis<br>[1.51] | Headaches<br>[0.86] | Asthma<br>[1.48]    | Anxiety<br>[0.95] | Conduct<br>[0.97]   | Back Pain<br>[0.85]  | Depression<br>[1.01] | Falls<br>[0.77]      |
| Luton                | Neonatal<br>[1.11] | Congenital<br>[0.86] | Dermatitis<br>[1.52] | Asthma<br>[1.48]    | Headaches<br>[0.82] | Anxiety<br>[0.95] | Conduct<br>[0.93]   | Back Pain<br>[0.83]  | Depression<br>[0.97] | Falls<br>[0.84]      |
| Norfolk              | Neonatal<br>[0.66] | Congenital<br>[0.55] | Dermatitis<br>[1.5]  | Headaches<br>[0.88] | Asthma<br>[1.43]    | Anxiety<br>[1.01] | Conduct<br>[0.96]   | Back Pain<br>[0.9]   | Depression<br>[1.06] | Drugs<br>[2.09]      |
| Peterborough         | Neonatal<br>[0.71] | Congenital<br>[0.59] | Dermatitis<br>[1.53] | Asthma<br>[1.48]    | Headaches<br>[0.8]  | Anxiety<br>[0.95] | Conduct<br>[0.91]   | Back Pain<br>[0.82]  | Depression<br>[0.95] | Road Inj<br>[0.32]   |
| Southend-on-Sea      | Neonatal<br>[0.63] | Congenital<br>[0.51] | Dermatitis<br>[1.52] | Headaches<br>[0.84] | Asthma<br>[1.42]    | Anxiety<br>[0.99] | Conduct<br>[0.93]   | Back Pain<br>[0.85]  | Depression<br>[1.01] | Iron<br>[2.4]        |
| Suffolk              | Neonatal<br>[0.6]  | Congenital<br>[0.47] | Dermatitis<br>[1.5]  | Headaches<br>[0.88] | Asthma<br>[1.41]    | Anxiety<br>[1.01] | Conduct<br>[0.96]   | Back Pain<br>[0.89]  | Depression<br>[1.06] | Iron<br>[2.57]       |
| Thurrock             | Neonatal<br>[0.59] | Congenital<br>[0.46] | Dermatitis<br>[1.53] | Asthma<br>[1.45]    | Headaches<br>[0.82] | Anxiety<br>[0.99] | Conduct<br>[0.92]   | Back Pain<br>[0.83]  | Depression<br>[0.99] | Falls<br>[0.84]      |
| Greater London       | Neonatal<br>[1.14] | Congenital<br>[0.8]  | Dermatitis<br>[1.54] | Asthma<br>[1.77]    | Headaches<br>[0.81] | Anxiety<br>[0.88] | Conduct<br>[0.93]   | Back Pain<br>[0.79]  | Depression<br>[0.94] | Falls<br>[0.73]      |
| Barking & Dagenham   | Neonatal<br>[0.72] | Congenital<br>[0.55] | Dermatitis<br>[2.0]  | Asthma<br>[1.61]    | Headaches<br>[0.75] | Anxiety<br>[0.93] | Iron<br>[2.93]      | Conduct<br>[0.87]    | Back Pain<br>[0.78]  | Depression<br>[0.89] |
| Barnet               | Neonatal<br>[0.71] | Congenital<br>[0.55] | Dermatitis<br>[1.52] | Asthma<br>[1.7]     | Headaches<br>[0.8]  | Anxiety<br>[0.91] | Conduct<br>[0.93]   | Back Pain<br>[0.8]   | Depression<br>[0.95] | Falls<br>[0.76]      |
| Bexley               | Neonatal<br>[0.6]  | Congenital<br>[0.48] | Dermatitis<br>[1.5]  | Asthma<br>[1.67]    | Headaches<br>[0.86] | Anxiety<br>[0.99] | Conduct<br>[0.94]   | Back Pain<br>[0.89]  | Depression<br>[1.04] | Falls<br>[0.83]      |
| Brent                | Neonatal<br>[0.95] | Congenital<br>[0.69] | Dermatitis<br>[1.5]  | Asthma<br>[1.7]     | Headaches<br>[0.81] | Anxiety<br>[0.93] | Conduct<br>[0.94]   | Back Pain<br>[0.83]  | Depression<br>[0.97] | Falls<br>[0.79]      |
| Bromley              | Neonatal<br>[0.7]  | Congenital<br>[0.52] | Dermatitis<br>[1.51] | Asthma<br>[1.68]    | Headaches<br>[0.84] | Anxiety<br>[0.95] | Conduct<br>[0.94]   | Back Pain<br>[0.85]  | Depression<br>[1.0]  | Falls<br>[0.79]      |
| Camden               | Neonatal<br>[1.13] | Congenital<br>[0.79] | Dermatitis<br>[1.52] | Asthma<br>[1.85]    | Headaches<br>[0.88] | Anxiety<br>[0.89] | Conduct<br>[0.96]   | Back Pain<br>[0.84]  | Depression<br>[1.02] | Drugs<br>[2.06]      |
| Croydon              | Neonatal<br>[0.81] | Congenital<br>[0.6]  | Dermatitis<br>[1.53] | Asthma<br>[1.67]    | Headaches<br>[0.8]  | Anxiety<br>[0.93] | Conduct<br>[0.89]   | Back Pain<br>[0.81]  | Depression<br>[0.94] | Iron<br>[2.79]       |
| Ealing               | Neonatal<br>[0.85] | Congenital<br>[0.6]  | Dermatitis<br>[1.53] | Asthma<br>[1.71]    | Headaches<br>[0.78] | Anxiety<br>[0.89] | Conduct<br>[0.91]   | Back Pain<br>[0.78]  | Depression<br>[0.92] | Falls<br>[0.75]      |
| Enfield              | Neonatal<br>[0.83] | Congenital<br>[0.57] | Dermatitis<br>[1.52] | Asthma<br>[1.67]    | Headaches<br>[0.82] | Anxiety<br>[0.95] | Conduct<br>[0.93]   | Back Pain<br>[0.83]  | Depression<br>[0.97] | Falls<br>[0.79]      |
| Greenwich            | Neonatal<br>[1.01] | Congenital<br>[0.69] | Dermatitis<br>[1.53] | Asthma<br>[1.64]    | Headaches<br>[0.79] | Anxiety<br>[0.92] | Conduct<br>[0.88]   | Back Pain<br>[0.81]  | Depression<br>[0.94] | Falls<br>[0.77]      |
| Hackney              | Neonatal<br>[1.55] | Congenital<br>[1.0]  | Dermatitis<br>[1.52] | Asthma<br>[1.82]    | Headaches<br>[0.79] | Anxiety<br>[0.87] | Conduct<br>[0.9]    | Back Pain<br>[0.78]  | Depression<br>[0.92] | SIDS<br>[1.44]       |
| Hammersmith & Fulham | Neonatal<br>[1.29] | Congenital<br>[0.89] | Dermatitis<br>[1.55] | Asthma<br>[1.8]     | Headaches<br>[0.78] | Anxiety<br>[0.83] | Conduct<br>[0.9]    | Back Pain<br>[0.74]  | Depression<br>[0.9]  | Falls<br>[0.71]      |
| Haringey             | Neonatal<br>[0.97] | Congenital<br>[0.66] | Dermatitis<br>[1.5]  | Asthma<br>[1.71]    | Headaches<br>[0.84] | Anxiety<br>[0.95] | Conduct<br>[0.95]   | Back Pain<br>[0.85]  | Depression<br>[0.99] | Falls<br>[0.79]      |
| Harrow               | Neonatal<br>[1.04] | Congenital<br>[0.69] | Dermatitis<br>[1.51] | Asthma<br>[1.68]    | Headaches<br>[0.83] | Anxiety<br>[0.95] | Conduct<br>[0.94]   | Back Pain<br>[0.84]  | Depression<br>[0.99] | Falls<br>[0.79]      |

**eFigure 7a. Leading ten causes of DALYs with the ratio of observed DALYs to DALYs expected on the basis of Socio-Demographic Index alone in 2017, <20 years, both sexes combined.** The top ten causes contributing to DALYs are listed globally, by socio-demographic quintile, and then by GBD superregion, region, country, and subnationally where modeled. For each cell, the ratio of observed DALYs to DALYs expected on the basis of socio-demographic index (SDI) alone are listed. Abbreviations: DALY=disability-adjusted life year, GBD=Global Burden of Disease.

Values shown in brackets represent the ratio of observed DALYs to predicted DALYs on the basis of Socio-Demographic Index (SDI), rounded to two (2) digits. Color ranges (shown below) were calculated to place a roughly equal number of cells into each bin.

| COLOR KEY:           |                    | [0.0-0.5]            | [0.5-0.69]           | [0.69-0.82]         | [0.82-0.92]         | [0.92-1.01]       | [1.01-1.18]         | [1.18-1.48]          | [1.48-2.26]          | 2.26+               |
|----------------------|--------------------|----------------------|----------------------|---------------------|---------------------|-------------------|---------------------|----------------------|----------------------|---------------------|
|                      | 1                  | 2                    | 3                    | 4                   | 5                   | 6                 | 7                   | 8                    | 9                    | 10                  |
| Havering             | Neonatal<br>[0.61] | Congenital<br>[0.48] | Dermatitis<br>[1.5]  | Asthma<br>[1.66]    | Headaches<br>[0.85] | Anxiety<br>[0.98] | Conduct<br>[0.93]   | Back Pain<br>[0.88]  | Depression<br>[1.03] | Falls<br>[0.83]     |
| Hillingdon           | Neonatal<br>[0.92] | Congenital<br>[0.74] | Dermatitis<br>[1.51] | Asthma<br>[1.8]     | Headaches<br>[0.83] | Anxiety<br>[0.91] | Conduct<br>[0.94]   | Back Pain<br>[0.83]  | Depression<br>[0.98] | Falls<br>[0.76]     |
| Hounslow             | Neonatal<br>[1.14] | Congenital<br>[0.8]  | Dermatitis<br>[1.54] | Asthma<br>[1.74]    | Headaches<br>[0.77] | Anxiety<br>[0.86] | Conduct<br>[0.89]   | Back Pain<br>[0.75]  | Depression<br>[0.9]  | Falls<br>[0.74]     |
| Islington            | Neonatal<br>[1.18] | Congenital<br>[0.9]  | Dermatitis<br>[1.53] | Asthma<br>[1.85]    | Headaches<br>[0.82] | Anxiety<br>[0.85] | Conduct<br>[0.91]   | Back Pain<br>[0.79]  | Depression<br>[0.95] | Drugs<br>[2.03]     |
| Kensington & Chelsea | Neonatal<br>[0.98] | Congenital<br>[0.71] | Dermatitis<br>[1.53] | Asthma<br>[1.82]    | Headaches<br>[0.83] | Anxiety<br>[0.85] | Conduct<br>[0.94]   | Back Pain<br>[0.79]  | Depression<br>[0.96] | Drugs<br>[1.94]     |
| Kingston upon Thames | Neonatal<br>[1.01] | Congenital<br>[0.75] | Dermatitis<br>[1.53] | Asthma<br>[1.76]    | Headaches<br>[0.84] | Anxiety<br>[0.9]  | Conduct<br>[0.92]   | Back Pain<br>[0.82]  | Depression<br>[0.98] | Falls<br>[0.73]     |
| Lambeth              | Neonatal<br>[1.44] | Congenital<br>[1.01] | Dermatitis<br>[1.53] | Asthma<br>[1.77]    | Headaches<br>[0.8]  | Anxiety<br>[0.86] | Conduct<br>[0.91]   | Back Pain<br>[0.77]  | Depression<br>[0.92] | SIDS<br>[1.35]      |
| Lewisham             | Neonatal<br>[1.12] | Congenital<br>[0.68] | Dermatitis<br>[1.53] | Asthma<br>[1.66]    | Headaches<br>[0.76] | Anxiety<br>[0.89] | Conduct<br>[0.87]   | Back Pain<br>[0.77]  | Depression<br>[0.9]  | Falls<br>[0.76]     |
| Merton               | Neonatal<br>[1.01] | Congenital<br>[0.76] | Dermatitis<br>[1.54] | Asthma<br>[1.71]    | Headaches<br>[0.75] | Anxiety<br>[0.85] | Conduct<br>[0.88]   | Back Pain<br>[0.74]  | Depression<br>[0.88] | Falls<br>[0.73]     |
| Newham               | Neonatal<br>[0.97] | Congenital<br>[0.72] | Dermatitis<br>[1.51] | Asthma<br>[1.68]    | Headaches<br>[0.8]  | Anxiety<br>[0.92] | Conduct<br>[0.89]   | Back Pain<br>[0.82]  | Depression<br>[0.95] | Falls<br>[0.78]     |
| Redbridge            | Neonatal<br>[0.64] | Congenital<br>[0.51] | Dermatitis<br>[1.52] | Asthma<br>[1.65]    | Headaches<br>[0.8]  | Anxiety<br>[0.94] | Conduct<br>[0.91]   | Back Pain<br>[0.82]  | Depression<br>[0.95] | Falls<br>[0.8]      |
| Richmond upon Thames | Neonatal<br>[0.85] | Congenital<br>[0.68] | Dermatitis<br>[1.54] | Asthma<br>[1.76]    | Headaches<br>[0.79] | Anxiety<br>[0.87] | Conduct<br>[0.92]   | Back Pain<br>[0.76]  | Depression<br>[0.91] | Falls<br>[0.72]     |
| Southwark            | Neonatal<br>[1.49] | Congenital<br>[0.98] | Dermatitis<br>[1.54] | Asthma<br>[1.79]    | Headaches<br>[0.78] | Anxiety<br>[0.84] | Conduct<br>[0.9]    | Back Pain<br>[0.75]  | Depression<br>[0.9]  | Falls<br>[0.72]     |
| Sutton               | Neonatal<br>[0.78] | Congenital<br>[0.64] | Dermatitis<br>[1.52] | Asthma<br>[1.69]    | Headaches<br>[0.82] | Anxiety<br>[0.94] | Conduct<br>[0.92]   | Back Pain<br>[0.83]  | Depression<br>[0.98] | Falls<br>[0.79]     |
| Tower Hamlets        | Neonatal<br>[1.63] | Congenital<br>[1.11] | Dermatitis<br>[1.52] | Asthma<br>[1.81]    | Headaches<br>[0.79] | Anxiety<br>[0.85] | Conduct<br>[0.91]   | Back Pain<br>[0.77]  | Depression<br>[0.92] | Falls<br>[0.73]     |
| Waltham Forest       | Neonatal<br>[0.77] | Congenital<br>[0.57] | Dermatitis<br>[1.53] | Asthma<br>[1.61]    | Headaches<br>[0.77] | Anxiety<br>[0.92] | Conduct<br>[0.87]   | Back Pain<br>[0.79]  | Depression<br>[0.92] | Falls<br>[0.81]     |
| Wandsworth           | Neonatal<br>[1.26] | Congenital<br>[0.86] | Dermatitis<br>[1.55] | Asthma<br>[1.73]    | Headaches<br>[0.74] | Anxiety<br>[0.8]  | Conduct<br>[0.86]   | Back Pain<br>[0.7]   | Depression<br>[0.85] | URI<br>[1.29]       |
| Westminster          | Neonatal<br>[1.1]  | Congenital<br>[0.77] | Dermatitis<br>[1.52] | Asthma<br>[1.87]    | Headaches<br>[0.85] | Anxiety<br>[0.88] | Conduct<br>[0.96]   | Back Pain<br>[0.82]  | Depression<br>[0.99] | Drugs<br>[1.9]      |
| NE England           | Neonatal<br>[0.66] | Congenital<br>[0.57] | Dermatitis<br>[1.61] | Headaches<br>[0.88] | Asthma<br>[1.45]    | Anxiety<br>[1.01] | Conduct<br>[0.95]   | Back Pain<br>[0.89]  | Depression<br>[1.05] | Iron<br>[2.8]       |
| County Durham        | Neonatal<br>[0.69] | Congenital<br>[0.56] | Dermatitis<br>[1.78] | Headaches<br>[0.88] | Asthma<br>[1.47]    | Anxiety<br>[1.02] | Conduct<br>[0.94]   | Depression<br>[1.06] | Iron<br>[3.0]        | Back Pain<br>[0.84] |
| Darlington           | Neonatal<br>[0.69] | Congenital<br>[0.58] | Dermatitis<br>[1.5]  | Headaches<br>[0.87] | Asthma<br>[1.48]    | Anxiety<br>[1.0]  | Conduct<br>[0.96]   | Back Pain<br>[0.9]   | Depression<br>[1.04] | Iron<br>[2.94]      |
| Gateshead            | Neonatal<br>[0.82] | Congenital<br>[0.63] | Dermatitis<br>[1.77] | Headaches<br>[0.85] | Asthma<br>[1.47]    | Anxiety<br>[0.98] | Conduct<br>[0.93]   | Back Pain<br>[0.88]  | Depression<br>[1.02] | Iron<br>[3.11]      |
| Hartlepool           | Neonatal<br>[0.65] | Congenital<br>[0.51] | Dermatitis<br>[1.5]  | Headaches<br>[0.88] | Asthma<br>[1.47]    | Anxiety<br>[1.04] | Conduct<br>[0.94]   | Back Pain<br>[0.91]  | Depression<br>[1.07] | Drugs<br>[2.39]     |
| Middlesbrough        | Neonatal<br>[0.7]  | Congenital<br>[0.63] | Dermatitis<br>[1.51] | Headaches<br>[0.85] | Asthma<br>[1.47]    | Anxiety<br>[0.99] | Conduct<br>[0.92]   | Back Pain<br>[0.87]  | Depression<br>[1.02] | Iron<br>[2.35]      |
| Newcastle upon Tyne  | Neonatal<br>[0.82] | Congenital<br>[0.73] | Dermatitis<br>[1.48] | Headaches<br>[0.91] | Asthma<br>[1.54]    | Anxiety<br>[0.96] | Back Pain<br>[0.92] | Conduct<br>[0.96]    | Depression<br>[1.09] | Drugs<br>[2.17]     |
| N Tyneside           | Neonatal<br>[0.56] | Congenital<br>[0.52] | Dermatitis<br>[1.5]  | Headaches<br>[0.85] | Asthma<br>[1.45]    | Anxiety<br>[0.98] | Conduct<br>[0.94]   | Back Pain<br>[0.86]  | Depression<br>[1.01] | Falls<br>[0.91]     |
| Northumberland       | Neonatal<br>[0.53] | Congenital<br>[0.51] | Dermatitis<br>[1.48] | Headaches<br>[0.91] | Asthma<br>[1.45]    | Anxiety<br>[1.05] | Conduct<br>[0.99]   | Back Pain<br>[0.94]  | Depression<br>[1.1]  | Iron<br>[2.58]      |
| Redcar & Cleveland   | Neonatal<br>[0.51] | Congenital<br>[0.46] | Dermatitis<br>[1.5]  | Headaches<br>[0.87] | Asthma<br>[1.43]    | Anxiety<br>[1.04] | Conduct<br>[0.95]   | Back Pain<br>[0.91]  | Depression<br>[1.06] | Iron<br>[2.23]      |
| S Tyneside           | Neonatal<br>[0.49] | Congenital<br>[0.47] | Dermatitis<br>[1.79] | Headaches<br>[0.87] | Asthma<br>[1.42]    | Anxiety<br>[1.02] | Conduct<br>[0.92]   | Back Pain<br>[0.9]   | Depression<br>[1.05] | Iron<br>[2.57]      |
| Stockton-on-Tees     | Neonatal<br>[0.77] | Congenital<br>[0.59] | Dermatitis<br>[1.51] | Headaches<br>[0.85] | Asthma<br>[1.48]    | Anxiety<br>[0.98] | Conduct<br>[0.94]   | Back Pain<br>[0.87]  | Depression<br>[1.02] | Iron<br>[2.8]       |
| Sunderland           | Neonatal<br>[0.6]  | Congenital<br>[0.54] | Dermatitis<br>[1.77] | Headaches<br>[0.89] | Anxiety<br>[1.02]   | Asthma<br>[1.3]   | Conduct<br>[0.96]   | Back Pain<br>[0.91]  | Depression<br>[1.07] | Iron<br>[2.71]      |

**eFigure 7a. Leading ten causes of DALYs with the ratio of observed DALYs to DALYs expected on the basis of Socio-Demographic Index alone in 2017, <20 years, both sexes combined.** The top ten causes contributing to DALYs are listed globally, by socio-demographic quintile, and then by GBD superregion, region, country, and subnationally where modeled. For each cell, the ratio of observed DALYs to DALYs expected on the basis of socio-demographic index (SDI) alone are listed. Abbreviations: DALY=disability-adjusted life year, GBD=Global Burden of Disease.

Values shown in brackets represent the ratio of observed DALYs to predicted DALYs on the basis of Socio-Demographic Index (SDI), rounded to two (2) digits. Color ranges (shown below) were calculated to place a roughly equal number of cells into each bin.

| COLOR KEY:            |                    | [0.0-0.5]            | [0.5-0.69]           | [0.69-0.82]          | [0.82-0.92]         | [0.92-1.01]       | [1.01-1.18]          | [1.18-1.48]          | [1.48-2.26]          | 2.26+              |
|-----------------------|--------------------|----------------------|----------------------|----------------------|---------------------|-------------------|----------------------|----------------------|----------------------|--------------------|
|                       | 1                  | 2                    | 3                    | 4                    | 5                   | 6                 | 7                    | 8                    | 9                    | 10                 |
| NW England            | Neonatal<br>[0.91] | Congenital<br>[0.71] | Dermatitis<br>[1.5]  | Headaches<br>[0.87]  | Asthma<br>[1.5]     | Anxiety<br>[0.98] | Conduct<br>[0.95]    | Back Pain<br>[0.87]  | Depression<br>[1.05] | Falls<br>[0.87]    |
| Blackburn with Darwen | Neonatal<br>[0.81] | Congenital<br>[0.64] | Dermatitis<br>[1.51] | Asthma<br>[1.49]     | Headaches<br>[0.85] | Anxiety<br>[1.01] | Conduct<br>[0.94]    | Back Pain<br>[0.89]  | Depression<br>[1.02] | Iron<br>[2.44]     |
| Blackpool             | Neonatal<br>[0.73] | Congenital<br>[0.59] | Dermatitis<br>[1.52] | Headaches<br>[0.87]  | Asthma<br>[1.47]    | Anxiety<br>[1.05] | Conduct<br>[0.93]    | Back Pain<br>[0.91]  | Depression<br>[1.06] | Drugs<br>[2.94]    |
| Bolton                | Neonatal<br>[0.73] | Congenital<br>[0.59] | Dermatitis<br>[1.5]  | Headaches<br>[0.85]  | Asthma<br>[1.45]    | Anxiety<br>[1.0]  | Conduct<br>[0.94]    | Back Pain<br>[0.9]   | Depression<br>[1.03] | Iron<br>[2.34]     |
| Bury                  | Neonatal<br>[0.77] | Congenital<br>[0.64] | Dermatitis<br>[1.51] | Headaches<br>[0.84]  | Asthma<br>[1.43]    | Anxiety<br>[0.99] | Conduct<br>[0.94]    | Back Pain<br>[0.88]  | Depression<br>[1.0]  | Iron<br>[2.59]     |
| Cheshire E            | Neonatal<br>[0.95] | Congenital<br>[0.7]  | Dermatitis<br>[1.49] | Headaches<br>[0.9]   | Asthma<br>[1.53]    | Anxiety<br>[0.99] | Conduct<br>[1.0]     | Back Pain<br>[0.91]  | Depression<br>[1.07] | Falls<br>[0.82]    |
| Cheshire W & Chester  | Neonatal<br>[0.9]  | Congenital<br>[0.73] | Dermatitis<br>[1.49] | Headaches<br>[0.9]   | Asthma<br>[1.52]    | Anxiety<br>[0.99] | Conduct<br>[0.98]    | Back Pain<br>[0.9]   | Depression<br>[1.07] | Road Inj<br>[0.37] |
| Cumbria               | Neonatal<br>[0.73] | Congenital<br>[0.58] | Dermatitis<br>[1.49] | Headaches<br>[0.9]   | Asthma<br>[1.49]    | Anxiety<br>[1.02] | Conduct<br>[0.98]    | Back Pain<br>[0.92]  | Depression<br>[1.08] | Road Inj<br>[0.36] |
| Halton                | Neonatal<br>[0.75] | Congenital<br>[0.59] | Dermatitis<br>[1.51] | Headaches<br>[0.87]  | Asthma<br>[1.51]    | Anxiety<br>[1.01] | Conduct<br>[0.96]    | Back Pain<br>[0.88]  | Depression<br>[1.04] | Falls<br>[0.88]    |
| Knowsley              | Neonatal<br>[0.67] | Congenital<br>[0.62] | Dermatitis<br>[1.5]  | Asthma<br>[1.53]     | Headaches<br>[0.87] | Anxiety<br>[1.0]  | Conduct<br>[0.94]    | Back Pain<br>[0.89]  | Depression<br>[1.04] | Road Inj<br>[0.34] |
| Lancashire            | Neonatal<br>[0.88] | Congenital<br>[0.71] | Dermatitis<br>[1.49] | Headaches<br>[0.89]  | Asthma<br>[1.5]     | Anxiety<br>[1.0]  | Conduct<br>[0.96]    | Depression<br>[1.06] | Back Pain<br>[0.84]  | Falls<br>[0.9]     |
| Liverpool             | Neonatal<br>[1.27] | Congenital<br>[0.92] | Dermatitis<br>[1.49] | Headaches<br>[0.9]   | Asthma<br>[1.51]    | Anxiety<br>[0.9]  | Depression<br>[1.24] | Conduct<br>[0.94]    | Back Pain<br>[0.9]   | Drugs<br>[2.41]    |
| Manchester            | Neonatal<br>[1.6]  | Congenital<br>[1.1]  | Dermatitis<br>[1.51] | Asthma<br>[1.57]     | Headaches<br>[0.84] | Anxiety<br>[0.91] | Back Pain<br>[0.87]  | Conduct<br>[0.93]    | Depression<br>[0.99] | Falls<br>[0.81]    |
| Oldham                | Neonatal<br>[0.84] | Congenital<br>[0.71] | Dermatitis<br>[1.51] | Asthma<br>[1.53]     | Headaches<br>[0.86] | Anxiety<br>[1.03] | Conduct<br>[0.94]    | Back Pain<br>[0.91]  | Depression<br>[1.04] | Falls<br>[0.92]    |
| Rochdale              | Neonatal<br>[0.67] | Congenital<br>[0.59] | Dermatitis<br>[1.51] | Headaches<br>[0.85]  | Asthma<br>[1.47]    | Anxiety<br>[1.02] | Conduct<br>[0.93]    | Back Pain<br>[0.9]   | Depression<br>[1.03] | Iron<br>[2.35]     |
| Salford               | Neonatal<br>[1.05] | Congenital<br>[0.86] | Dermatitis<br>[1.53] | Asthma<br>[1.52]     | Headaches<br>[0.8]  | Anxiety<br>[0.93] | Conduct<br>[0.9]     | Back Pain<br>[0.82]  | Depression<br>[0.95] | Falls<br>[0.86]    |
| Sefton                | Neonatal<br>[0.77] | Congenital<br>[0.61] | Dermatitis<br>[1.5]  | Headaches<br>[0.87]  | Asthma<br>[1.45]    | Anxiety<br>[1.01] | Conduct<br>[0.95]    | Back Pain<br>[0.89]  | Depression<br>[1.05] | Drugs<br>[2.37]    |
| St Helens             | Neonatal<br>[0.65] | Congenital<br>[0.55] | Dermatitis<br>[1.51] | Headaches<br>[0.86]  | Asthma<br>[1.45]    | Anxiety<br>[1.01] | Conduct<br>[0.94]    | Back Pain<br>[0.89]  | Depression<br>[1.03] | Drugs<br>[2.29]    |
| Stockport             | Neonatal<br>[0.94] | Congenital<br>[0.76] | Dermatitis<br>[1.51] | Headaches<br>[0.85]  | Asthma<br>[1.47]    | Anxiety<br>[0.97] | Conduct<br>[0.95]    | Back Pain<br>[0.87]  | Depression<br>[1.01] | Falls<br>[0.86]    |
| Tameside              | Neonatal<br>[0.62] | Congenital<br>[0.55] | Dermatitis<br>[1.52] | Asthma<br>[1.45]     | Headaches<br>[0.83] | Anxiety<br>[1.0]  | Conduct<br>[0.91]    | Depression<br>[1.0]  | Back Pain<br>[0.7]   | Falls<br>[0.89]    |
| Trafford              | Neonatal<br>[0.91] | Congenital<br>[0.64] | Dermatitis<br>[1.51] | Headaches<br>[0.87]  | Asthma<br>[1.56]    | Anxiety<br>[0.96] | Conduct<br>[1.0]     | Back Pain<br>[0.87]  | Depression<br>[1.02] | Falls<br>[0.82]    |
| Warrington            | Neonatal<br>[1.04] | Congenital<br>[0.73] | Dermatitis<br>[1.5]  | Headaches<br>[0.87]  | Asthma<br>[1.54]    | Anxiety<br>[0.97] | Conduct<br>[0.98]    | Back Pain<br>[0.88]  | Depression<br>[1.04] | Drugs<br>[2.04]    |
| Wigan                 | Neonatal<br>[0.65] | Congenital<br>[0.52] | Dermatitis<br>[1.51] | Headaches<br>[0.86]  | Asthma<br>[1.45]    | Anxiety<br>[1.02] | Conduct<br>[0.95]    | Back Pain<br>[0.9]   | Depression<br>[1.03] | Iron<br>[2.18]     |
| Wirral                | Neonatal<br>[0.79] | Congenital<br>[0.65] | Dermatitis<br>[1.5]  | Headaches<br>[0.88]  | Asthma<br>[1.45]    | Anxiety<br>[1.03] | Conduct<br>[0.96]    | Back Pain<br>[0.9]   | Depression<br>[1.06] | Drugs<br>[2.32]    |
| SE England            | Neonatal<br>[0.76] | Congenital<br>[0.57] | Dermatitis<br>[1.64] | Headaches<br>[0.88]  | Asthma<br>[1.58]    | Anxiety<br>[0.98] | Conduct<br>[0.97]    | Back Pain<br>[0.86]  | Depression<br>[1.04] | Falls<br>[0.81]    |
| Bracknell Forest      | Neonatal<br>[0.56] | Congenital<br>[0.53] | Dermatitis<br>[1.52] | Headaches<br>[0.84]  | Asthma<br>[1.46]    | Anxiety<br>[0.93] | Conduct<br>[0.95]    | Back Pain<br>[0.83]  | Depression<br>[0.99] | Falls<br>[0.78]    |
| Brighton & Hove       | Neonatal<br>[1.12] | Congenital<br>[0.82] | Dermatitis<br>[1.74] | Headaches<br>[0.95]  | Anxiety<br>[0.98]   | Asthma<br>[1.53]  | Conduct<br>[1.01]    | Back Pain<br>[0.92]  | Depression<br>[1.12] | Drugs<br>[2.44]    |
| Buckinghamshire       | Neonatal<br>[0.93] | Congenital<br>[0.66] | Dermatitis<br>[1.5]  | Headaches<br>[0.89]  | Anxiety<br>[0.98]   | Asthma<br>[1.46]  | Conduct<br>[0.99]    | Back Pain<br>[0.88]  | Depression<br>[1.06] | Epilepsy<br>[1.69] |
| E Sussex              | Neonatal<br>[0.61] | Congenital<br>[0.51] | Dermatitis<br>[1.73] | Headaches<br>[0.91]  | Anxiety<br>[1.04]   | Asthma<br>[1.36]  | Conduct<br>[0.98]    | Back Pain<br>[0.93]  | Depression<br>[1.1]  | Drugs<br>[2.15]    |
| Hampshire             | Neonatal<br>[0.7]  | Congenital<br>[0.51] | Asthma<br>[2.18]     | Dermatitis<br>[1.49] | Headaches<br>[0.89] | Anxiety<br>[0.99] | Conduct<br>[0.98]    | Back Pain<br>[0.88]  | Depression<br>[1.05] | Falls<br>[0.81]    |
| Isle of Wight         | Neonatal<br>[0.41] | Congenital<br>[0.38] | Asthma<br>[2.13]     | Dermatitis<br>[1.44] | Headaches<br>[0.93] | Anxiety<br>[1.05] | Conduct<br>[0.99]    | Back Pain<br>[0.95]  | Depression<br>[1.13] | Drugs<br>[2.15]    |

**eFigure 7a. Leading ten causes of DALYs with the ratio of observed DALYs to DALYs expected on the basis of Socio-Demographic Index alone in 2017, <20 years, both sexes combined.** The top ten causes contributing to DALYs are listed globally, by socio-demographic quintile, and then by GBD superregion, region, country, and subnationally where modeled. For each cell, the ratio of observed DALYs to DALYs expected on the basis of socio-demographic index (SDI) alone are listed. Abbreviations: DALY=disability-adjusted life year, GBD=Global Burden of Disease.

Values shown in brackets represent the ratio of observed DALYs to predicted DALYs on the basis of Socio-Demographic Index (SDI), rounded to two (2) digits. Color ranges (shown below) were calculated to place a roughly equal number of cells into each bin.

| COLOR KEY:           |                    | [0.0-0.5]            | [0.5-0.69]           | [0.69-0.82]         | [0.82-0.92]         | [0.92-1.01]       | [1.01-1.18]         | [1.18-1.48]          | [1.48-2.26]          | 2.26+               |
|----------------------|--------------------|----------------------|----------------------|---------------------|---------------------|-------------------|---------------------|----------------------|----------------------|---------------------|
|                      | 1                  | 2                    | 3                    | 4                   | 5                   | 6                 | 7                   | 8                    | 9                    | 10                  |
| Kent                 | Neonatal<br>[0.65] | Congenital<br>[0.49] | Dermatitis<br>[1.73] | Headaches<br>[0.89] | Anxiety<br>[1.01]   | Asthma<br>[1.4]   | Conduct<br>[0.97]   | Back Pain<br>[0.9]   | Depression<br>[1.07] | Falls<br>[0.84]     |
| Medway               | Neonatal<br>[0.68] | Congenital<br>[0.53] | Dermatitis<br>[1.5]  | Headaches<br>[0.87] | Asthma<br>[1.4]     | Anxiety<br>[1.01] | Conduct<br>[0.94]   | Back Pain<br>[0.88]  | Depression<br>[1.05] | Falls<br>[0.85]     |
| Milton Keynes        | Neonatal<br>[0.99] | Congenital<br>[0.7]  | Dermatitis<br>[1.54] | Asthma<br>[1.49]    | Headaches<br>[0.8]  | Anxiety<br>[0.92] | Conduct<br>[0.93]   | Back Pain<br>[0.79]  | Depression<br>[0.94] | Falls<br>[0.8]      |
| Oxfordshire          | Neonatal<br>[0.82] | Dermatitis<br>[1.93] | Congenital<br>[0.63] | Headaches<br>[0.89] | Asthma<br>[1.48]    | Anxiety<br>[0.96] | Conduct<br>[0.98]   | Back Pain<br>[0.87]  | Depression<br>[1.05] | Falls<br>[0.77]     |
| Portsmouth           | Neonatal<br>[0.71] | Congenital<br>[0.53] | Dermatitis<br>[1.5]  | Headaches<br>[0.87] | Asthma<br>[1.45]    | Anxiety<br>[0.96] | Conduct<br>[0.95]   | Back Pain<br>[0.86]  | Depression<br>[1.04] | Drugs<br>[2.06]     |
| Reading              | Neonatal<br>[1.27] | Congenital<br>[0.88] | Dermatitis<br>[1.99] | Asthma<br>[1.51]    | Headaches<br>[0.78] | Anxiety<br>[0.86] | Conduct<br>[0.9]    | Back Pain<br>[0.76]  | Depression<br>[0.91] | Falls<br>[0.74]     |
| Slough               | Neonatal<br>[1.04] | Congenital<br>[0.81] | Dermatitis<br>[1.54] | Asthma<br>[1.55]    | Headaches<br>[0.77] | Anxiety<br>[0.9]  | Conduct<br>[0.92]   | Back Pain<br>[0.76]  | Depression<br>[0.9]  | Falls<br>[0.79]     |
| Southampton          | Neonatal<br>[0.92] | Congenital<br>[0.71] | Dermatitis<br>[1.5]  | Headaches<br>[0.85] | Asthma<br>[1.45]    | Anxiety<br>[0.93] | Conduct<br>[0.92]   | Back Pain<br>[0.84]  | Depression<br>[1.01] | Falls<br>[0.8]      |
| Surrey               | Neonatal<br>[0.8]  | Congenital<br>[0.59] | Dermatitis<br>[1.74] | Headaches<br>[0.88] | Anxiety<br>[0.95]   | Asthma<br>[1.48]  | Conduct<br>[0.99]   | Depression<br>[1.03] | Back Pain<br>[0.79]  | Falls<br>[0.76]     |
| West Berkshire       | Neonatal<br>[0.7]  | Congenital<br>[0.59] | Dermatitis<br>[1.5]  | Headaches<br>[0.89] | Asthma<br>[1.5]     | Anxiety<br>[0.98] | Conduct<br>[1.0]    | Back Pain<br>[0.88]  | Depression<br>[1.06] | Falls<br>[0.8]      |
| W Sussex             | Neonatal<br>[0.69] | Congenital<br>[0.54] | Dermatitis<br>[1.55] | Asthma<br>[1.63]    | Headaches<br>[0.86] | Anxiety<br>[0.97] | Conduct<br>[0.97]   | Back Pain<br>[0.86]  | Depression<br>[1.03] | Falls<br>[0.8]      |
| Windsor & Maidenhead | Neonatal<br>[0.85] | Congenital<br>[0.7]  | Dermatitis<br>[1.5]  | Headaches<br>[0.89] | Asthma<br>[1.51]    | Anxiety<br>[0.96] | Conduct<br>[1.02]   | Back Pain<br>[0.87]  | Depression<br>[1.04] | Falls<br>[0.77]     |
| Wokingham            | Neonatal<br>[0.76] | Congenital<br>[0.64] | Dermatitis<br>[1.51] | Headaches<br>[0.88] | Asthma<br>[1.5]     | Anxiety<br>[0.96] | Conduct<br>[1.01]   | Back Pain<br>[0.86]  | Depression<br>[1.03] | Falls<br>[0.79]     |
| SW England           | Neonatal<br>[0.72] | Congenital<br>[0.55] | Dermatitis<br>[1.49] | Headaches<br>[0.89] | Asthma<br>[1.44]    | Anxiety<br>[1.0]  | Conduct<br>[0.97]   | Back Pain<br>[0.89]  | Depression<br>[1.06] | Falls<br>[0.83]     |
| Bath & NE Somerset   | Neonatal<br>[0.77] | Congenital<br>[0.53] | Dermatitis<br>[1.46] | Headaches<br>[0.96] | Anxiety<br>[1.01]   | Asthma<br>[1.48]  | Back Pain<br>[0.96] | Conduct<br>[1.01]    | Depression<br>[1.15] | Drugs<br>[2.04]     |
| Bournemouth          | Neonatal<br>[0.81] | Congenital<br>[0.63] | Dermatitis<br>[1.51] | Headaches<br>[0.83] | Asthma<br>[1.42]    | Anxiety<br>[0.92] | Conduct<br>[0.9]    | Back Pain<br>[0.82]  | Depression<br>[0.99] | Iron<br>[3.7]       |
| Bristol              | Neonatal<br>[1.07] | Congenital<br>[0.76] | Dermatitis<br>[1.52] | Headaches<br>[0.83] | Asthma<br>[1.49]    | Anxiety<br>[0.9]  | Conduct<br>[0.92]   | Back Pain<br>[0.81]  | Depression<br>[0.98] | Falls<br>[0.73]     |
| Cornwall             | Neonatal<br>[0.73] | Congenital<br>[0.53] | Dermatitis<br>[1.49] | Headaches<br>[0.9]  | Anxiety<br>[1.03]   | Asthma<br>[1.4]   | Conduct<br>[0.96]   | Depression<br>[1.09] | Iron<br>[3.3]        | Back Pain<br>[0.86] |
| Devon                | Neonatal<br>[0.71] | Congenital<br>[0.55] | Dermatitis<br>[1.48] | Headaches<br>[0.91] | Anxiety<br>[1.02]   | Asthma<br>[1.43]  | Conduct<br>[0.99]   | Back Pain<br>[0.92]  | Depression<br>[1.1]  | Falls<br>[0.87]     |
| Dorset               | Neonatal<br>[0.62] | Congenital<br>[0.47] | Dermatitis<br>[1.47] | Headaches<br>[0.93] | Anxiety<br>[1.06]   | Asthma<br>[1.44]  | Conduct<br>[1.01]   | Back Pain<br>[0.95]  | Depression<br>[1.12] | Road Inj<br>[0.33]  |
| Gloucestershire      | Neonatal<br>[0.71] | Congenital<br>[0.55] | Dermatitis<br>[1.49] | Headaches<br>[0.9]  | Anxiety<br>[0.99]   | Asthma<br>[1.45]  | Conduct<br>[0.97]   | Back Pain<br>[0.9]   | Depression<br>[1.07] | Falls<br>[0.83]     |
| N Somerset           | Neonatal<br>[0.66] | Congenital<br>[0.57] | Dermatitis<br>[1.5]  | Headaches<br>[0.87] | Asthma<br>[1.44]    | Anxiety<br>[1.0]  | Conduct<br>[0.96]   | Back Pain<br>[0.87]  | Depression<br>[1.05] | Drugs<br>[2.15]     |
| Plymouth             | Neonatal<br>[0.7]  | Congenital<br>[0.58] | Dermatitis<br>[1.5]  | Headaches<br>[0.87] | Asthma<br>[1.42]    | Anxiety<br>[0.98] | Conduct<br>[0.94]   | Back Pain<br>[0.87]  | Depression<br>[1.04] | Drugs<br>[2.16]     |
| Poole                | Neonatal<br>[0.61] | Congenital<br>[0.47] | Dermatitis<br>[1.5]  | Headaches<br>[0.87] | Asthma<br>[1.43]    | Anxiety<br>[0.99] | Conduct<br>[0.96]   | Back Pain<br>[0.86]  | Depression<br>[1.03] | Falls<br>[0.83]     |
| Somerset             | Neonatal<br>[0.65] | Congenital<br>[0.5]  | Dermatitis<br>[1.49] | Headaches<br>[0.91] | Anxiety<br>[1.04]   | Asthma<br>[1.4]   | Conduct<br>[0.97]   | Back Pain<br>[0.93]  | Depression<br>[1.1]  | Falls<br>[0.87]     |
| S Gloucestershire    | Neonatal<br>[0.72] | Congenital<br>[0.57] | Dermatitis<br>[1.5]  | Headaches<br>[0.88] | Asthma<br>[1.47]    | Anxiety<br>[0.97] | Conduct<br>[0.97]   | Back Pain<br>[0.87]  | Depression<br>[1.04] | Falls<br>[0.78]     |
| Swindon              | Neonatal<br>[0.64] | Congenital<br>[0.53] | Dermatitis<br>[1.51] | Headaches<br>[0.83] | Asthma<br>[1.46]    | Anxiety<br>[0.95] | Conduct<br>[0.94]   | Back Pain<br>[0.84]  | Depression<br>[0.99] | Iron<br>[3.46]      |
| Torbay               | Neonatal<br>[0.62] | Congenital<br>[0.49] | Dermatitis<br>[1.5]  | Headaches<br>[0.87] | Asthma<br>[1.38]    | Anxiety<br>[1.04] | Conduct<br>[0.95]   | Back Pain<br>[0.9]   | Depression<br>[1.06] | Iron<br>[2.06]      |
| Wiltshire            | Neonatal<br>[0.67] | Congenital<br>[0.48] | Dermatitis<br>[1.49] | Headaches<br>[0.89] | Anxiety<br>[1.02]   | Asthma<br>[1.42]  | Conduct<br>[0.97]   | Back Pain<br>[0.91]  | Depression<br>[1.07] | Iron<br>[3.31]      |
| W Midlands           | Neonatal<br>[1.07] | Congenital<br>[0.82] | Dermatitis<br>[1.5]  | Headaches<br>[0.87] | Asthma<br>[1.47]    | Anxiety<br>[1.0]  | Conduct<br>[0.96]   | Back Pain<br>[0.88]  | Depression<br>[1.05] | Falls<br>[0.89]     |
| Birmingham           | Neonatal<br>[1.47] | Congenital<br>[1.12] | Dermatitis<br>[1.5]  | Headaches<br>[0.86] | Asthma<br>[1.47]    | Anxiety<br>[0.98] | Conduct<br>[0.95]   | Back Pain<br>[0.89]  | Depression<br>[1.03] | Falls<br>[0.91]     |

**Figure 7a. Leading ten causes of DALYs with the ratio of observed DALYs to DALYs expected on the basis of Socio-Demographic Index alone in 2017, <20 years, both sexes combined.** The top ten causes contributing to DALYs are listed globally, by socio-demographic quintile, and then by GBD superregion, region, country, and subnationally where modeled. For each cell, the ratio of observed DALYs to DALYs expected on the basis of socio-demographic index (SDI) alone are listed. Abbreviations: DALY=disability-adjusted life year, GBD=Global Burden of Disease.

Values shown in brackets represent the ratio of observed DALYs to predicted DALYs on the basis of Socio-Demographic Index (SDI), rounded to two (2) digits. Color ranges (shown below) were calculated to place a roughly equal number of cells into each bin.

| COLOR KEY:            |                    | [0.0-0.5]            | [0.5-0.69]           | [0.69-0.82]          | [0.82-0.92]         | [0.92-1.01]       | [1.01-1.18]          | [1.18-1.48]          | [1.48-2.26]          | 2.26+                |
|-----------------------|--------------------|----------------------|----------------------|----------------------|---------------------|-------------------|----------------------|----------------------|----------------------|----------------------|
|                       | 1                  | 2                    | 3                    | 4                    | 5                   | 6                 | 7                    | 8                    | 9                    | 10                   |
| Coventry              | Neonatal<br>[1.14] | Congenital<br>[0.87] | Dermatitis<br>[1.51] | Headaches<br>[0.85]  | Asthma<br>[1.5]     | Anxiety<br>[0.95] | Conduct<br>[0.93]    | Back Pain<br>[0.86]  | Depression<br>[1.01] | Falls<br>[0.81]      |
| Dudley                | Neonatal<br>[0.81] | Congenital<br>[0.67] | Dermatitis<br>[1.51] | Headaches<br>[0.87]  | Asthma<br>[1.45]    | Anxiety<br>[1.03] | Conduct<br>[0.95]    | Back Pain<br>[0.91]  | Depression<br>[1.05] | Falls<br>[0.92]      |
| Herefordshire         | Neonatal<br>[0.75] | Congenital<br>[0.65] | Dermatitis<br>[1.49] | Headaches<br>[0.9]   | Asthma<br>[1.46]    | Anxiety<br>[1.02] | Conduct<br>[0.97]    | Road Inj<br>[0.43]   | Back Pain<br>[0.92]  | Depression<br>[1.07] |
| Sandwell              | Neonatal<br>[1.07] | Congenital<br>[0.79] | Dermatitis<br>[1.52] | Asthma<br>[1.47]     | Headaches<br>[0.81] | Anxiety<br>[0.99] | Conduct<br>[0.92]    | Back Pain<br>[0.86]  | Depression<br>[0.98] | Falls<br>[0.91]      |
| Shropshire            | Neonatal<br>[0.64] | Congenital<br>[0.53] | Dermatitis<br>[1.48] | Headaches<br>[0.94]  | Anxiety<br>[1.05]   | Asthma<br>[1.44]  | Conduct<br>[1.0]     | Back Pain<br>[0.97]  | Depression<br>[1.13] | Road Inj<br>[0.31]   |
| Solihull              | Neonatal<br>[0.83] | Congenital<br>[0.74] | Dermatitis<br>[1.49] | Headaches<br>[0.89]  | Asthma<br>[1.5]     | Anxiety<br>[0.99] | Conduct<br>[0.99]    | Back Pain<br>[0.9]   | Depression<br>[1.06] | Road Inj<br>[0.35]   |
| Staffordshire         | Neonatal<br>[0.92] | Congenital<br>[0.69] | Dermatitis<br>[1.49] | Headaches<br>[0.9]   | Asthma<br>[1.46]    | Anxiety<br>[1.03] | Conduct<br>[0.99]    | Depression<br>[1.09] | Back Pain<br>[0.83]  | Road Inj<br>[0.34]   |
| Stoke-on-Trent        | Neonatal<br>[1.23] | Congenital<br>[0.92] | Dermatitis<br>[1.52] | Headaches<br>[0.84]  | Asthma<br>[1.45]    | Anxiety<br>[1.0]  | Conduct<br>[0.93]    | Depression<br>[1.01] | Back Pain<br>[0.78]  | Falls<br>[1.0]       |
| Telford & Wrekin      | Neonatal<br>[0.9]  | Congenital<br>[0.71] | Dermatitis<br>[1.51] | Headaches<br>[0.87]  | Asthma<br>[1.46]    | Anxiety<br>[1.01] | Conduct<br>[0.94]    | Back Pain<br>[0.9]   | Depression<br>[1.04] | Road Inj<br>[0.33]   |
| Walsall               | Neonatal<br>[1.03] | Congenital<br>[0.78] | Dermatitis<br>[1.52] | Headaches<br>[0.86]  | Asthma<br>[1.45]    | Anxiety<br>[1.03] | Conduct<br>[0.94]    | Back Pain<br>[0.91]  | Depression<br>[1.04] | Iron<br>[2.1]        |
| Warwickshire          | Neonatal<br>[0.96] | Congenital<br>[0.72] | Dermatitis<br>[1.5]  | Headaches<br>[0.88]  | Asthma<br>[1.5]     | Anxiety<br>[0.98] | Conduct<br>[0.98]    | Back Pain<br>[0.89]  | Depression<br>[1.05] | Falls<br>[0.84]      |
| Wolverhampton         | Neonatal<br>[0.93] | Congenital<br>[0.74] | Dermatitis<br>[1.52] | Headaches<br>[0.85]  | Asthma<br>[1.43]    | Anxiety<br>[0.99] | Conduct<br>[0.93]    | Back Pain<br>[0.88]  | Depression<br>[1.02] | Falls<br>[0.86]      |
| Worcestershire        | Neonatal<br>[0.88] | Congenital<br>[0.68] | Dermatitis<br>[1.49] | Headaches<br>[0.9]   | Asthma<br>[1.45]    | Anxiety<br>[1.02] | Conduct<br>[0.98]    | Back Pain<br>[0.92]  | Depression<br>[1.08] | Falls<br>[0.88]      |
| Yorkshire & Humber    | Neonatal<br>[0.76] | Congenital<br>[0.63] | Dermatitis<br>[1.5]  | Headaches<br>[0.87]  | Asthma<br>[1.48]    | Anxiety<br>[0.99] | Conduct<br>[0.95]    | Back Pain<br>[0.89]  | Depression<br>[1.04] | Falls<br>[0.84]      |
| Barnsley              | Neonatal<br>[0.54] | Congenital<br>[0.47] | Dermatitis<br>[1.52] | Asthma<br>[1.49]     | Headaches<br>[0.85] | Anxiety<br>[1.03] | Conduct<br>[0.92]    | Back Pain<br>[0.9]   | Depression<br>[1.03] | Iron<br>[2.17]       |
| Bradford              | Neonatal<br>[0.84] | Congenital<br>[0.69] | Dermatitis<br>[1.51] | Headaches<br>[0.85]  | Asthma<br>[1.44]    | Anxiety<br>[1.01] | Conduct<br>[0.94]    | Back Pain<br>[0.89]  | Depression<br>[1.02] | Iron<br>[2.21]       |
| Calderdale            | Neonatal<br>[0.72] | Congenital<br>[0.61] | Dermatitis<br>[1.51] | Headaches<br>[0.87]  | Asthma<br>[1.48]    | Anxiety<br>[1.0]  | Conduct<br>[0.95]    | Back Pain<br>[0.9]   | Depression<br>[1.04] | Road Inj<br>[0.35]   |
| Doncaster             | Neonatal<br>[0.73] | Congenital<br>[0.58] | Dermatitis<br>[1.52] | Headaches<br>[0.85]  | Asthma<br>[1.45]    | Anxiety<br>[1.03] | Conduct<br>[0.93]    | Back Pain<br>[0.9]   | Depression<br>[1.03] | Road Inj<br>[0.29]   |
| E Riding of Yorkshire | Neonatal<br>[0.52] | Congenital<br>[0.48] | Dermatitis<br>[1.48] | Headaches<br>[0.93]  | Asthma<br>[1.49]    | Anxiety<br>[1.05] | Conduct<br>[0.99]    | Back Pain<br>[0.96]  | Depression<br>[1.12] | Road Inj<br>[0.37]   |
| Kingston upon Hull    | Neonatal<br>[0.69] | Congenital<br>[0.57] | Dermatitis<br>[1.53] | Asthma<br>[1.5]      | Headaches<br>[0.8]  | Anxiety<br>[0.95] | Conduct<br>[0.9]     | Back Pain<br>[0.82]  | Depression<br>[0.96] | Drugs<br>[2.17]      |
| Kirklees              | Neonatal<br>[0.76] | Congenital<br>[0.65] | Dermatitis<br>[1.51] | Headaches<br>[0.87]  | Asthma<br>[1.45]    | Anxiety<br>[1.01] | Conduct<br>[0.94]    | Back Pain<br>[0.9]   | Depression<br>[1.04] | Iron<br>[2.46]       |
| Leeds                 | Neonatal<br>[0.97] | Congenital<br>[0.77] | Dermatitis<br>[1.52] | Headaches<br>[0.84]  | Asthma<br>[1.51]    | Anxiety<br>[0.92] | Conduct<br>[0.93]    | Back Pain<br>[0.84]  | Depression<br>[0.99] | Falls<br>[0.78]      |
| NE Lincolnshire       | Neonatal<br>[0.61] | Congenital<br>[0.53] | Dermatitis<br>[1.52] | Asthma<br>[1.49]     | Headaches<br>[0.84] | Anxiety<br>[1.0]  | Conduct<br>[0.93]    | Back Pain<br>[0.86]  | Depression<br>[1.01] | Road Inj<br>[0.31]   |
| N Lincolnshire        | Neonatal<br>[0.59] | Congenital<br>[0.5]  | Dermatitis<br>[1.51] | Headaches<br>[0.86]  | Asthma<br>[1.5]     | Anxiety<br>[1.01] | Conduct<br>[0.95]    | Back Pain<br>[0.89]  | Road Inj<br>[0.4]    | Depression<br>[1.03] |
| N Yorkshire           | Neonatal<br>[0.61] | Congenital<br>[0.5]  | Dermatitis<br>[1.48] | Headaches<br>[0.9]   | Asthma<br>[1.46]    | Anxiety<br>[1.02] | Conduct<br>[1.0]     | Back Pain<br>[0.93]  | Depression<br>[1.08] | Falls<br>[0.84]      |
| Rotherham             | Neonatal<br>[0.62] | Congenital<br>[0.55] | Dermatitis<br>[1.51] | Headaches<br>[0.87]  | Asthma<br>[1.47]    | Anxiety<br>[1.03] | Conduct<br>[0.94]    | Back Pain<br>[0.91]  | Depression<br>[1.05] | Iron<br>[2.09]       |
| Sheffield             | Neonatal<br>[0.9]  | Congenital<br>[0.75] | Dermatitis<br>[1.49] | Headaches<br>[0.9]   | Asthma<br>[1.49]    | Anxiety<br>[0.98] | Conduct<br>[0.96]    | Back Pain<br>[0.91]  | Depression<br>[1.08] | Drugs<br>[2.03]      |
| Wakefield             | Neonatal<br>[0.62] | Congenital<br>[0.51] | Dermatitis<br>[1.51] | Asthma<br>[1.5]      | Headaches<br>[0.85] | Anxiety<br>[1.01] | Conduct<br>[0.93]    | Back Pain<br>[0.89]  | Depression<br>[1.02] | Road Inj<br>[0.33]   |
| York                  | Neonatal<br>[0.79] | Congenital<br>[0.67] | Dermatitis<br>[1.48] | Headaches<br>[0.93]  | Asthma<br>[1.55]    | Anxiety<br>[0.98] | Back Pain<br>[0.92]  | Conduct<br>[0.98]    | Depression<br>[1.11] | Road Inj<br>[0.38]   |
| N Ireland             | Neonatal<br>[0.88] | Congenital<br>[0.77] | Anxiety<br>[1.61]    | Dermatitis<br>[1.25] | Headaches<br>[0.95] | Asthma<br>[1.32]  | Depression<br>[1.17] | Back Pain<br>[0.93]  | Conduct<br>[0.81]    | Road Inj<br>[0.38]   |
| Scotland              | Neonatal<br>[0.55] | Congenital<br>[0.53] | Dermatitis<br>[1.35] | Headaches<br>[0.96]  | Anxiety<br>[1.12]   | Asthma<br>[1.47]  | Depression<br>[1.15] | Conduct<br>[0.91]    | Back Pain<br>[0.91]  | Iron<br>[2.7]        |

**eFigure 7a. Leading ten causes of DALYs with the ratio of observed DALYs to DALYs expected on the basis of Socio-Demographic Index alone in 2017, <20 years, both sexes combined.** The top ten causes contributing to DALYs are listed globally, by socio-demographic quintile, and then by GBD superregion, region, country, and subnationally where modeled. For each cell, the ratio of observed DALYs to DALYs expected on the basis of socio-demographic index (SDI) alone are listed. Abbreviations: DALY=disability-adjusted life year, GBD=Global Burden of Disease.

Values shown in brackets represent the ratio of observed DALYs to predicted DALYs on the basis of Socio-Demographic Index (SDI), rounded to two (2) digits. Color ranges (shown below) were calculated to place a roughly equal number of cells into each bin.

| COLOR KEY:                  |                       | [0.0-0.5]            | [0.5-0.69]           | [0.69-0.82]          | [0.82-0.92]          | [0.92-1.01]          | [1.01-1.18]          | [1.18-1.48]          | [1.48-2.26]          | 2.26+               |
|-----------------------------|-----------------------|----------------------|----------------------|----------------------|----------------------|----------------------|----------------------|----------------------|----------------------|---------------------|
|                             | 1                     | 2                    | 3                    | 4                    | 5                    | 6                    | 7                    | 8                    | 9                    | 10                  |
| Wales                       | Neonatal<br>[0.56]    | Congenital<br>[0.48] | Dermatitis<br>[1.25] | Headaches<br>[0.97]  | Anxiety<br>[1.11]    | Asthma<br>[1.3]      | Depression<br>[1.2]  | Conduct<br>[0.89]    | Back Pain<br>[0.77]  | Falls<br>[1.01]     |
| Latin America and Caribbean | Neonatal<br>[0.69]    | Congenital<br>[0.66] | LRI<br>[0.6]         | Violence<br>[3.69]   | Diarrhea<br>[1.34]   | Road Inj<br>[0.69]   | Headaches<br>[1.19]  | Asthma<br>[1.19]     | Back Pain<br>[1.29]  | F Body<br>[0.86]    |
| Andean Latin America        | Neonatal<br>[0.69]    | Congenital<br>[0.64] | LRI<br>[0.82]        | F Body<br>[1.82]     | Road Inj<br>[0.69]   | Diarrhea<br>[0.94]   | HIV<br>[8.39]        | Dermatitis<br>[1.45] | Headaches<br>[1.08]  | Asthma<br>[1.44]    |
| Bolivia                     | Neonatal<br>[0.83]    | LRI<br>[0.8]         | Congenital<br>[0.78] | Diarrhea<br>[0.72]   | Iron<br>[1.71]       | F Body<br>[1.7]      | Road Inj<br>[0.71]   | STI<br>[4.0]         | HIV<br>[6.57]        | Asthma<br>[1.62]    |
| Ecuador                     | Neonatal<br>[0.61]    | Congenital<br>[0.6]  | LRI<br>[0.69]        | Road Inj<br>[1.0]    | Headaches<br>[1.38]  | Diarrhea<br>[0.79]   | Dermatitis<br>[1.27] | Asthma<br>[1.3]      | Self Harm<br>[1.68]  | Violence<br>[1.31]  |
| Peru                        | Neonatal<br>[0.6]     | Congenital<br>[0.57] | LRI<br>[0.78]        | F Body<br>[2.24]     | HIV<br>[12.19]       | Diarrhea<br>[0.96]   | Iron<br>[1.53]       | Road Inj<br>[0.51]   | Dermatitis<br>[1.53] | Asthma<br>[1.41]    |
| Caribbean                   | Neonatal<br>[1.19]    | Congenital<br>[0.93] | LRI<br>[1.34]        | Diarrhea<br>[4.59]   | Road Inj<br>[1.15]   | Iron<br>[1.94]       | Asthma<br>[2.0]      | Meningitis<br>[1.22] | Violence<br>[2.2]    | STI<br>[6.91]       |
| Antigua                     | Neonatal<br>[0.68]    | Congenital<br>[0.47] | Iron<br>[4.88]       | LRI<br>[0.96]        | Headaches<br>[1.2]   | Asthma<br>[1.81]     | Drown<br>[1.35]      | Dermatitis<br>[1.01] | Road Inj<br>[0.42]   | Anxiety<br>[1.0]    |
| Bahamas                     | Neonatal<br>[0.88]    | Congenital<br>[0.53] | LRI<br>[1.51]        | Violence<br>[4.5]    | Headaches<br>[1.21]  | Asthma<br>[1.93]     | Road Inj<br>[0.69]   | Drown<br>[1.68]      | Endocrine<br>[2.56]  | Dermatitis<br>[1.0] |
| Barbados                    | Neonatal<br>[0.94]    | Congenital<br>[0.59] | Headaches<br>[1.21]  | LRI<br>[0.93]        | Asthma<br>[1.71]     | Violence<br>[2.35]   | Road Inj<br>[0.48]   | Dermatitis<br>[0.98] | Anxiety<br>[0.99]    | Conduct<br>[0.9]    |
| Belize                      | Neonatal<br>[0.64]    | Congenital<br>[0.44] | LRI<br>[0.4]         | Violence<br>[2.48]   | Road Inj<br>[0.6]    | Iron<br>[1.49]       | Asthma<br>[1.72]     | Headaches<br>[1.26]  | Diarrhea<br>[0.52]   | Drown<br>[0.67]     |
| Bermuda                     | Neonatal<br>[0.62]    | Asthma<br>[2.25]     | Congenital<br>[0.38] | Headaches<br>[1.15]  | Dermatitis<br>[1.0]  | Anxiety<br>[0.88]    | Road Inj<br>[0.41]   | Conduct<br>[0.88]    | Depression<br>[0.86] | Back Pain<br>[0.71] |
| Cuba                        | Neonatal<br>[0.28]    | Congenital<br>[0.32] | Headaches<br>[1.18]  | Asthma<br>[1.81]     | Dermatitis<br>[1.05] | Iron<br>[1.36]       | Anxiety<br>[1.01]    | Road Inj<br>[0.33]   | LRI<br>[0.25]        | Conduct<br>[0.86]   |
| Dominica                    | Neonatal<br>[1.59]    | Congenital<br>[1.02] | LRI<br>[1.28]        | Road Inj<br>[0.91]   | Drown<br>[1.38]      | Asthma<br>[1.95]     | Headaches<br>[1.26]  | Iron<br>[2.18]       | Violence<br>[2.25]   | Endocrine<br>[2.64] |
| Dominican Rep               | Neonatal<br>[1.2]     | Congenital<br>[0.6]  | LRI<br>[0.4]         | Road Inj<br>[0.88]   | Diarrhea<br>[0.77]   | STI<br>[5.38]        | Violence<br>[2.05]   | Headaches<br>[1.22]  | Iron<br>[1.02]       | Asthma<br>[1.29]    |
| Grenada                     | Neonatal<br>[0.6]     | Congenital<br>[0.34] | LRI<br>[0.43]        | Headaches<br>[1.21]  | Asthma<br>[1.61]     | Drown<br>[0.73]      | Iron<br>[1.12]       | Dermatitis<br>[1.09] | Road Inj<br>[0.33]   | Anxiety<br>[1.08]   |
| Guyana                      | Neonatal<br>[0.95]    | Congenital<br>[0.42] | LRI<br>[0.33]        | Diarrhea<br>[0.7]    | Asthma<br>[1.59]     | Iron<br>[1.18]       | Road Inj<br>[0.49]   | Headaches<br>[1.23]  | Drown<br>[0.65]      | Violence<br>[1.46]  |
| Haiti                       | Neonatal<br>[0.63]    | Diarrhea<br>[1.07]   | LRI<br>[0.63]        | Congenital<br>[1.02] | Road Inj<br>[1.45]   | Meningitis<br>[0.59] | Whooping<br>[1.3]    | Iron<br>[1.39]       | Drown<br>[0.77]      | STI<br>[1.34]       |
| Jamaica                     | Neonatal<br>[1.18]    | Congenital<br>[0.53] | Violence<br>[3.11]   | Headaches<br>[1.25]  | Asthma<br>[1.83]     | STI<br>[8.93]        | Iron<br>[1.64]       | LRI<br>[0.29]        | Dermatitis<br>[1.04] | Road Inj<br>[0.38]  |
| Puerto Rico                 | Disaster<br>[5993.81] | Neonatal<br>[0.9]    | Congenital<br>[0.54] | Asthma<br>[2.67]     | Violence<br>[5.36]   | Headaches<br>[1.25]  | Dermatitis<br>[0.96] | Road Inj<br>[0.51]   | Anxiety<br>[0.94]    | Conduct<br>[0.94]   |
| St Lucia                    | Neonatal<br>[0.74]    | Congenital<br>[0.34] | STI<br>[9.53]        | Headaches<br>[1.25]  | Asthma<br>[1.76]     | Violence<br>[1.96]   | LRI<br>[0.29]        | Road Inj<br>[0.44]   | Dermatitis<br>[1.07] | Anxiety<br>[1.09]   |
| St Vincent                  | Neonatal<br>[0.67]    | Congenital<br>[0.41] | LRI<br>[0.31]        | Violence<br>[2.01]   | Asthma<br>[1.66]     | Headaches<br>[1.24]  | Drown<br>[0.69]      | Iron<br>[1.13]       | Diarrhea<br>[0.48]   | Road Inj<br>[0.37]  |
| Suriname                    | Neonatal<br>[1.36]    | Congenital<br>[0.71] | LRI<br>[0.61]        | Diarrhea<br>[1.58]   | Road Inj<br>[0.7]    | Asthma<br>[1.85]     | Headaches<br>[1.16]  | Drown<br>[0.74]      | Self Harm<br>[1.84]  | Iron<br>[1.14]      |
| Trinidad Tobago             | Neonatal<br>[1.19]    | Congenital<br>[0.86] | LRI<br>[0.69]        | Violence<br>[3.03]   | Asthma<br>[2.1]      | Headaches<br>[1.11]  | Road Inj<br>[0.58]   | Dermatitis<br>[1.07] | Anxiety<br>[0.95]    | Diarrhea<br>[0.97]  |
| Virgin Isl US               | Neonatal<br>[1.17]    | Congenital<br>[0.67] | Violence<br>[5.56]   | Asthma<br>[2.04]     | Headaches<br>[1.12]  | Dermatitis<br>[1.0]  | Anxiety<br>[0.86]    | Road Inj<br>[0.44]   | Disaster<br>[435.0]  | Conduct<br>[0.87]   |
| Central Latin America       | Neonatal<br>[0.59]    | Congenital<br>[0.58] | LRI<br>[0.47]        | Violence<br>[3.76]   | Diarrhea<br>[1.04]   | Road Inj<br>[0.57]   | Headaches<br>[1.0]   | Epilepsy<br>[1.26]   | Conduct<br>[0.95]    | F Body<br>[0.73]    |
| Colombia                    | Neonatal<br>[0.6]     | Congenital<br>[0.52] | Violence<br>[3.36]   | LRI<br>[0.36]        | Headaches<br>[1.08]  | Road Inj<br>[0.48]   | Diarrhea<br>[0.74]   | Epilepsy<br>[1.23]   | Dermatitis<br>[0.93] | Conduct<br>[0.95]   |
| Costa Rica                  | Neonatal<br>[0.48]    | Congenital<br>[0.5]  | Headaches<br>[1.03]  | Road Inj<br>[0.43]   | Asthma<br>[1.24]     | Diarrhea<br>[0.79]   | Conduct<br>[0.94]    | Dermatitis<br>[0.87] | Violence<br>[1.06]   | Epilepsy<br>[1.05]  |
| El Salvador                 | Neonatal<br>[0.4]     | Violence<br>[5.89]   | Congenital<br>[0.48] | LRI<br>[0.26]        | Diarrhea<br>[0.58]   | HIV<br>[6.91]        | Road Inj<br>[0.46]   | Headaches<br>[1.1]   | Asthma<br>[1.05]     | Iron<br>[0.71]      |
| Guatemala                   | Neonatal<br>[0.54]    | LRI<br>[0.78]        | Diarrhea<br>[0.95]   | Congenital<br>[0.51] | Violence<br>[2.74]   | PEM<br>[1.11]        | Road Inj<br>[0.4]    | F Body<br>[0.92]     | Headaches<br>[1.09]  | Iron<br>[0.6]       |
| Honduras                    | Neonatal<br>[0.37]    | Diarrhea<br>[0.4]    | Violence<br>[3.11]   | Congenital<br>[0.2]  | LRI<br>[0.07]        | Endocrine<br>[2.1]   | Headaches<br>[1.1]   | Road Inj<br>[0.35]   | Asthma<br>[1.1]      | Iron<br>[0.66]      |

**eFigure 7a. Leading ten causes of DALYs with the ratio of observed DALYs to DALYs expected on the basis of Socio-Demographic Index alone in 2017, <20 years, both sexes combined.** The top ten causes contributing to DALYs are listed globally, by socio-demographic quintile, and then by GBD superregion, region, country, and subnationally where modeled. For each cell, the ratio of observed DALYs to DALYs expected on the basis of socio-demographic index (SDI) alone are listed. Abbreviations: DALY=disability-adjusted life year, GBD=Global Burden of Disease.

Values shown in brackets represent the ratio of observed DALYs to predicted DALYs on the basis of Socio-Demographic Index (SDI), rounded to two (2) digits. Color ranges (shown below) were calculated to place a roughly equal number of cells into each bin.

| COLOR KEY:      |                    | [0.0-0.5]            | [0.5-0.69]         | [0.69-0.82]        | [0.82-0.92]         | [0.92-1.01]         | [1.01-1.18]         | [1.18-1.48]         | [1.48-2.26]         | 2.26+                |
|-----------------|--------------------|----------------------|--------------------|--------------------|---------------------|---------------------|---------------------|---------------------|---------------------|----------------------|
|                 | 1                  | 2                    | 3                  | 4                  | 5                   | 6                   | 7                   | 8                   | 9                   | 10                   |
| Mexico          | Neonatal<br>[0.53] | Congenital<br>[0.64] | Violence<br>[3.59] | LRI<br>[0.36]      | Road Inj<br>[0.6]   | Diarrhea<br>[0.71]  | Headaches<br>[0.97] | Epilepsy<br>[1.38]  | F Body<br>[0.83]    | Conduct<br>[0.97]    |
| Aguascalientes  | Neonatal<br>[0.62] | Congenital<br>[0.72] | Violence<br>[2.8]  | Road Inj<br>[0.73] | LRI<br>[0.33]       | Headaches<br>[0.97] | Diarrhea<br>[0.86]  | F Body<br>[1.13]    | Epilepsy<br>[1.46]  | Conduct<br>[0.98]    |
| Baja CA         | Neonatal<br>[0.46] | Congenital<br>[0.51] | Violence<br>[3.73] | LRI<br>[0.3]       | F Body<br>[1.36]    | Headaches<br>[0.99] | Road Inj<br>[0.47]  | Conduct<br>[1.0]    | Epilepsy<br>[1.27]  | Diarrhea<br>[0.47]   |
| Baja CA Sur     | Neonatal<br>[0.54] | Congenital<br>[0.56] | Violence<br>[3.24] | Road Inj<br>[0.67] | LRI<br>[0.31]       | Headaches<br>[0.97] | Epilepsy<br>[1.32]  | Conduct<br>[0.99]   | Diarrhea<br>[0.67]  | Asthma<br>[0.84]     |
| Campeche        | Neonatal<br>[0.6]  | Congenital<br>[0.57] | Violence<br>[2.7]  | LRI<br>[0.26]      | Road Inj<br>[0.49]  | Diarrhea<br>[0.54]  | Headaches<br>[0.96] | Epilepsy<br>[1.17]  | Conduct<br>[0.96]   | Self Harm<br>[1.25]  |
| Chiapas         | Neonatal<br>[0.25] | Congenital<br>[0.42] | LRI<br>[0.28]      | Diarrhea<br>[0.54] | Violence<br>[2.18]  | Road Inj<br>[0.39]  | Epilepsy<br>[1.34]  | Headaches<br>[1.0]  | Leukemia<br>[1.08]  | PEM<br>[0.78]        |
| Chihuahua       | Neonatal<br>[0.72] | Congenital<br>[0.75] | Violence<br>[5.39] | LRI<br>[0.47]      | Road Inj<br>[0.79]  | F Body<br>[1.8]     | Headaches<br>[1.0]  | Diarrhea<br>[0.76]  | Epilepsy<br>[1.44]  | Conduct<br>[1.0]     |
| Coahuila        | Neonatal<br>[0.74] | Congenital<br>[0.72] | Violence<br>[3.27] | LRI<br>[0.36]      | Road Inj<br>[0.54]  | Headaches<br>[0.97] | F Body<br>[1.16]    | Diarrhea<br>[0.74]  | Epilepsy<br>[1.35]  | Conduct<br>[0.97]    |
| Colima          | Neonatal<br>[0.58] | Congenital<br>[0.64] | Violence<br>[3.92] | Road Inj<br>[0.66] | LRI<br>[0.32]       | Headaches<br>[0.97] | Diarrhea<br>[0.73]  | Epilepsy<br>[1.39]  | Conduct<br>[0.98]   | Asthma<br>[0.82]     |
| Mexico City     | Neonatal<br>[0.98] | Congenital<br>[1.11] | Violence<br>[5.82] | LRI<br>[1.29]      | Headaches<br>[0.95] | Road Inj<br>[0.52]  | Epilepsy<br>[1.75]  | Diarrhea<br>[1.22]  | Conduct<br>[0.94]   | Dermatitis<br>[0.82] |
| Durango         | Neonatal<br>[0.67] | Congenital<br>[0.66] | Violence<br>[3.7]  | Road Inj<br>[0.72] | LRI<br>[0.28]       | Headaches<br>[0.97] | F Body<br>[0.99]    | Diarrhea<br>[0.53]  | Epilepsy<br>[1.26]  | Conduct<br>[0.97]    |
| Guanajuato      | Neonatal<br>[0.49] | Congenital<br>[0.59] | Violence<br>[2.99] | Road Inj<br>[0.71] | LRI<br>[0.23]       | Headaches<br>[0.98] | Epilepsy<br>[1.32]  | Diarrhea<br>[0.47]  | Conduct<br>[0.98]   | Asthma<br>[0.83]     |
| Guerrero        | Neonatal<br>[0.36] | Congenital<br>[0.63] | Violence<br>[5.94] | LRI<br>[0.24]      | Diarrhea<br>[0.48]  | Road Inj<br>[0.67]  | Headaches<br>[1.01] | F Body<br>[0.81]    | PEM<br>[1.16]       | Epilepsy<br>[1.17]   |
| Hidalgo         | Neonatal<br>[0.37] | Congenital<br>[0.41] | Violence<br>[2.56] | Road Inj<br>[0.59] | LRI<br>[0.15]       | Headaches<br>[1.0]  | Epilepsy<br>[1.32]  | F Body<br>[0.76]    | Conduct<br>[0.99]   | Diarrhea<br>[0.25]   |
| Jalisco         | Neonatal<br>[0.54] | Congenital<br>[0.68] | Violence<br>[3.63] | Road Inj<br>[0.77] | LRI<br>[0.34]       | Headaches<br>[0.96] | Epilepsy<br>[1.54]  | Conduct<br>[0.97]   | Diarrhea<br>[0.58]  | Leukemia<br>[0.95]   |
| Mexico          | Neonatal<br>[0.56] | Congenital<br>[0.58] | Violence<br>[3.79] | LRI<br>[0.39]      | Road Inj<br>[0.48]  | Headaches<br>[0.93] | Diarrhea<br>[0.65]  | F Body<br>[0.92]    | Epilepsy<br>[1.31]  | Conduct<br>[0.98]    |
| Michoacan       | Neonatal<br>[0.36] | Congenital<br>[0.62] | Violence<br>[3.56] | LRI<br>[0.27]      | Road Inj<br>[0.79]  | Diarrhea<br>[0.42]  | F Body<br>[1.03]    | Headaches<br>[0.98] | Epilepsy<br>[1.22]  | Conduct<br>[0.97]    |
| Morelos         | Neonatal<br>[0.48] | Congenital<br>[0.59] | Violence<br>[4.37] | Road Inj<br>[0.5]  | LRI<br>[0.22]       | Headaches<br>[0.97] | Epilepsy<br>[1.38]  | Diarrhea<br>[0.57]  | Conduct<br>[0.97]   | Disaster<br>[121.51] |
| Nayarit         | Neonatal<br>[0.4]  | Congenital<br>[0.53] | Violence<br>[3.34] | Road Inj<br>[0.78] | LRI<br>[0.23]       | Headaches<br>[0.96] | Diarrhea<br>[0.51]  | Epilepsy<br>[1.27]  | Conduct<br>[0.97]   | Asthma<br>[0.81]     |
| Nuevo Leon      | Neonatal<br>[0.62] | Congenital<br>[0.79] | Violence<br>[3.8]  | LRI<br>[0.4]       | Headaches<br>[0.95] | Road Inj<br>[0.45]  | F Body<br>[1.23]    | Epilepsy<br>[1.36]  | Conduct<br>[0.96]   | Diarrhea<br>[0.67]   |
| Oaxaca          | Neonatal<br>[0.28] | Congenital<br>[0.57] | Violence<br>[3.29] | LRI<br>[0.24]      | Diarrhea<br>[0.54]  | Road Inj<br>[0.54]  | PEM<br>[1.75]       | Epilepsy<br>[1.48]  | Headaches<br>[1.02] | Leukemia<br>[0.99]   |
| Puebla          | Neonatal<br>[0.57] | Congenital<br>[0.77] | LRI<br>[0.4]       | Violence<br>[2.73] | Road Inj<br>[0.66]  | Diarrhea<br>[0.52]  | Headaches<br>[0.99] | F Body<br>[0.84]    | PEM<br>[1.64]       | Leukemia<br>[1.02]   |
| Queretaro       | Neonatal<br>[0.54] | Congenital<br>[0.68] | Violence<br>[2.76] | LRI<br>[0.31]      | Road Inj<br>[0.63]  | Headaches<br>[0.96] | F Body<br>[0.98]    | Diarrhea<br>[0.63]  | Epilepsy<br>[1.37]  | Conduct<br>[0.97]    |
| Quintana Roo    | Neonatal<br>[0.53] | Congenital<br>[0.55] | Violence<br>[3.07] | LRI<br>[0.26]      | Road Inj<br>[0.52]  | Diarrhea<br>[0.68]  | Headaches<br>[0.96] | F Body<br>[0.89]    | Epilepsy<br>[1.25]  | Conduct<br>[0.97]    |
| San Luis Potosi | Neonatal<br>[0.44] | Congenital<br>[0.75] | Violence<br>[3.22] | LRI<br>[0.36]      | Road Inj<br>[0.71]  | Diarrhea<br>[0.62]  | Headaches<br>[0.99] | Epilepsy<br>[1.55]  | F Body<br>[0.84]    | Conduct<br>[0.99]    |
| Sinaloa         | Neonatal<br>[0.5]  | Congenital<br>[0.59] | Violence<br>[4.59] | Road Inj<br>[0.76] | LRI<br>[0.3]        | Headaches<br>[0.97] | Epilepsy<br>[1.3]   | Conduct<br>[0.98]   | Diarrhea<br>[0.61]  | Asthma<br>[0.82]     |
| Sonora          | Neonatal<br>[0.51] | Congenital<br>[0.56] | Violence<br>[3.52] | Road Inj<br>[0.69] | LRI<br>[0.35]       | Headaches<br>[0.98] | Diarrhea<br>[0.72]  | Epilepsy<br>[1.4]   | Conduct<br>[0.99]   | F Body<br>[0.77]     |
| Tabasco         | Neonatal<br>[0.7]  | Congenital<br>[0.76] | Violence<br>[2.98] | Road Inj<br>[0.87] | LRI<br>[0.31]       | Diarrhea<br>[0.64]  | Drown<br>[0.65]     | Headaches<br>[0.98] | Epilepsy<br>[1.34]  | Leukemia<br>[1.08]   |
| Tamaulipas      | Neonatal<br>[0.64] | Congenital<br>[0.63] | Violence<br>[3.88] | Road Inj<br>[0.53] | LRI<br>[0.27]       | Headaches<br>[0.97] | Diarrhea<br>[0.62]  | Conduct<br>[0.98]   | Epilepsy<br>[1.24]  | F Body<br>[0.81]     |
| Tlaxcala        | Neonatal<br>[0.5]  | Congenital<br>[0.59] | LRI<br>[0.34]      | Violence<br>[2.54] | Road Inj<br>[0.61]  | Headaches<br>[1.0]  | Diarrhea<br>[0.45]  | Epilepsy<br>[1.38]  | F Body<br>[0.85]    | Conduct<br>[0.99]    |
| Veracruz        | Neonatal<br>[0.43] | Congenital<br>[0.49] | Violence<br>[3.0]  | LRI<br>[0.16]      | Headaches<br>[1.01] | Road Inj<br>[0.39]  | Diarrhea<br>[0.35]  | Epilepsy<br>[1.31]  | Conduct<br>[1.0]    | Asthma<br>[0.76]     |

**eFigure 7a. Leading ten causes of DALYs with the ratio of observed DALYs to DALYs expected on the basis of Socio-Demographic Index alone in 2017, <20 years, both sexes combined.** The top ten causes contributing to DALYs are listed globally, by socio-demographic quintile, and then by GBD superregion, region, country, and subnationally where modeled. For each cell, the ratio of observed DALYs to DALYs expected on the basis of socio-demographic index (SDI) alone are listed. Abbreviations: DALY=disability-adjusted life year, GBD=Global Burden of Disease.

Values shown in brackets represent the ratio of observed DALYs to predicted DALYs on the basis of Socio-Demographic Index (SDI), rounded to two (2) digits. Color ranges (shown below) were calculated to place a roughly equal number of cells into each bin.

| COLOR KEY:                    |                    | [0.0-0.5]            | [0.5-0.69]           | [0.69-0.82]         | [0.82-0.92]         | [0.92-1.01]          | [1.01-1.18]         | [1.18-1.48]          | [1.48-2.26]         | 2.26+                |
|-------------------------------|--------------------|----------------------|----------------------|---------------------|---------------------|----------------------|---------------------|----------------------|---------------------|----------------------|
|                               | 1                  | 2                    | 3                    | 4                   | 5                   | 6                    | 7                   | 8                    | 9                   | 10                   |
| Yucatan                       | Neonatal<br>[0.48] | Congenital<br>[0.63] | LRI<br>[0.4]         | Violence<br>[2.54]  | Headaches<br>[0.99] | Diarrhea<br>[0.67]   | Road Inj<br>[0.43]  | Epilepsy<br>[1.33]   | Conduct<br>[0.99]   | Leukemia<br>[0.87]   |
| Zacatecas                     | Neonatal<br>[0.41] | Congenital<br>[0.5]  | Violence<br>[3.18]   | Road Inj<br>[0.94]  | LRI<br>[0.27]       | Headaches<br>[0.97]  | Epilepsy<br>[1.39]  | Diarrhea<br>[0.4]    | F Body<br>[0.79]    | Conduct<br>[0.97]    |
| Nicaragua                     | Neonatal<br>[0.39] | Congenital<br>[0.44] | LRI<br>[0.23]        | Diarrhea<br>[0.31]  | Headaches<br>[1.08] | Dermatitis<br>[1.06] | HIV<br>[2.44]       | Road Inj<br>[0.25]   | Conduct<br>[0.95]   | Asthma<br>[0.76]     |
| Panama                        | Neonatal<br>[0.7]  | Congenital<br>[0.82] | LRI<br>[0.95]        | Diarrhea<br>[2.63]  | Violence<br>[2.84]  | Headaches<br>[0.98]  | Road Inj<br>[0.47]  | Dermatitis<br>[1.16] | Asthma<br>[1.3]     | PEM<br>[9.39]        |
| Venezuela                     | Neonatal<br>[0.85] | Violence<br>[7.18]   | Congenital<br>[0.63] | Diarrhea<br>[1.96]  | LRI<br>[0.53]       | Road Inj<br>[0.92]   | STI<br>[6.61]       | Headaches<br>[0.97]  | F Body<br>[1.04]    | Dermatitis<br>[0.99] |
| <b>Tropical Latin America</b> | Neonatal<br>[0.73] | Congenital<br>[0.72] | Violence<br>[5.08]   | LRI<br>[0.51]       | Road Inj<br>[0.77]  | Headaches<br>[1.49]  | Back Pain<br>[2.15] | Diarrhea<br>[1.03]   | Asthma<br>[1.37]    | Anxiety<br>[1.22]    |
| Brazil                        | Neonatal<br>[0.77] | Congenital<br>[0.75] | Violence<br>[5.36]   | LRI<br>[0.55]       | Road Inj<br>[0.78]  | Headaches<br>[1.49]  | Back Pain<br>[2.17] | Diarrhea<br>[1.08]   | Asthma<br>[1.37]    | Anxiety<br>[1.21]    |
| Acre                          | Neonatal<br>[0.65] | Congenital<br>[0.67] | Violence<br>[4.43]   | LRI<br>[0.42]       | Diarrhea<br>[0.74]  | Road Inj<br>[0.66]   | Headaches<br>[1.59] | Iron<br>[1.44]       | Back Pain<br>[2.41] | Drown<br>[0.61]      |
| Alagoas                       | Neonatal<br>[0.45] | Violence<br>[7.96]   | Congenital<br>[0.52] | LRI<br>[0.29]       | Diarrhea<br>[0.62]  | Road Inj<br>[0.69]   | Headaches<br>[1.56] | Back Pain<br>[2.33]  | Iron<br>[0.82]      | Asthma<br>[1.03]     |
| Amapa                         | Neonatal<br>[1.04] | Violence<br>[8.2]    | Congenital<br>[0.66] | LRI<br>[0.65]       | Headaches<br>[1.56] | Drown<br>[1.24]      | Road Inj<br>[0.65]  | Back Pain<br>[2.19]  | Iron<br>[1.58]      | Asthma<br>[1.31]     |
| Amazonas                      | Neonatal<br>[0.64] | Congenital<br>[0.66] | Violence<br>[4.84]   | LRI<br>[0.49]       | Diarrhea<br>[1.09]  | Headaches<br>[1.51]  | Back Pain<br>[2.22] | Iron<br>[1.37]       | Road Inj<br>[0.49]  | Drown<br>[0.77]      |
| Bahia                         | Neonatal<br>[0.66] | Congenital<br>[0.8]  | LRI<br>[0.38]        | Violence<br>[3.63]  | Diarrhea<br>[0.8]   | Headaches<br>[1.49]  | Back Pain<br>[2.23] | Road Inj<br>[0.49]   | Iron<br>[1.09]      | Asthma<br>[1.11]     |
| Ceara                         | Neonatal<br>[0.56] | Congenital<br>[0.71] | Violence<br>[5.79]   | LRI<br>[0.31]       | Road Inj<br>[0.75]  | Headaches<br>[1.47]  | Diarrhea<br>[0.63]  | Back Pain<br>[2.18]  | Iron<br>[1.01]      | Asthma<br>[1.17]     |
| Distrito Federal              | Neonatal<br>[1.43] | Congenital<br>[1.11] | Violence<br>[11.11]  | Headaches<br>[1.46] | Road Inj<br>[0.88]  | Back Pain<br>[1.96]  | LRI<br>[1.45]       | Asthma<br>[1.61]     | Anxiety<br>[1.06]   | Depression<br>[1.24] |
| Espirito Santo                | Neonatal<br>[0.75] | Congenital<br>[0.81] | Violence<br>[8.93]   | Road Inj<br>[0.83]  | Headaches<br>[1.49] | LRI<br>[0.43]        | Back Pain<br>[2.1]  | Iron<br>[1.85]       | Asthma<br>[1.61]    | Anxiety<br>[1.21]    |
| Goiás                         | Neonatal<br>[0.68] | Violence<br>[7.69]   | Congenital<br>[0.64] | Road Inj<br>[0.98]  | Headaches<br>[1.56] | Back Pain<br>[2.3]   | LRI<br>[0.31]       | Asthma<br>[1.37]     | Anxiety<br>[1.28]   | Depression<br>[1.44] |
| Maranhao                      | Neonatal<br>[0.36] | Congenital<br>[0.54] | LRI<br>[0.2]         | Diarrhea<br>[0.26]  | Headaches<br>[1.54] | Iron<br>[0.91]       | Road Inj<br>[0.48]  | Violence<br>[1.38]   | Back Pain<br>[2.31] | Vit A<br>[1.13]      |
| Mato Grosso                   | Neonatal<br>[0.75] | Congenital<br>[0.66] | Violence<br>[5.09]   | Road Inj<br>[1.14]  | LRI<br>[0.5]        | Headaches<br>[1.5]   | Back Pain<br>[2.19] | Asthma<br>[1.47]     | Diarrhea<br>[0.99]  | STI<br>[5.72]        |
| Mato Grosso do Sul            | Neonatal<br>[0.67] | Congenital<br>[0.72] | Violence<br>[3.72]   | Road Inj<br>[0.89]  | LRI<br>[0.43]       | Headaches<br>[1.52]  | Back Pain<br>[2.24] | Diarrhea<br>[1.08]   | Asthma<br>[1.34]    | Anxiety<br>[1.25]    |
| Minas Gerais                  | Neonatal<br>[0.69] | Congenital<br>[0.64] | Violence<br>[4.82]   | Road Inj<br>[0.8]   | Headaches<br>[1.53] | Back Pain<br>[2.27]  | LRI<br>[0.33]       | Asthma<br>[1.42]     | Anxiety<br>[1.26]   | Depression<br>[1.35] |
| Para                          | Neonatal<br>[0.48] | Congenital<br>[0.49] | LRI<br>[0.36]        | Violence<br>[3.71]  | Headaches<br>[1.55] | Diarrhea<br>[0.52]   | Road Inj<br>[0.55]  | Back Pain<br>[2.3]   | Iron<br>[0.94]      | Asthma<br>[1.18]     |
| Paraiba                       | Neonatal<br>[0.37] | Congenital<br>[0.53] | Violence<br>[4.99]   | LRI<br>[0.27]       | Road Inj<br>[0.72]  | Headaches<br>[1.47]  | Back Pain<br>[2.21] | Diarrhea<br>[0.39]   | Iron<br>[0.84]      | Vit A<br>[1.31]      |
| Parana                        | Neonatal<br>[0.76] | Congenital<br>[0.86] | Violence<br>[5.62]   | Road Inj<br>[1.1]   | Headaches<br>[1.54] | Back Pain<br>[2.24]  | LRI<br>[0.39]       | Asthma<br>[1.52]     | Anxiety<br>[1.23]   | Depression<br>[1.38] |
| Pernambuco                    | Neonatal<br>[0.57] | Congenital<br>[0.76] | Violence<br>[6.74]   | LRI<br>[0.31]       | Diarrhea<br>[0.73]  | Road Inj<br>[0.68]   | Headaches<br>[1.49] | Back Pain<br>[2.21]  | Iron<br>[1.16]      | Asthma<br>[1.22]     |
| Piaui                         | Neonatal<br>[0.56] | Congenital<br>[0.6]  | Road Inj<br>[0.86]   | LRI<br>[0.18]       | Violence<br>[2.26]  | Diarrhea<br>[0.35]   | Headaches<br>[1.52] | Back Pain<br>[2.32]  | Asthma<br>[1.08]    | Anxiety<br>[1.32]    |
| Rio de Janeiro                | Neonatal<br>[0.96] | Violence<br>[10.62]  | Congenital<br>[0.77] | LRI<br>[0.91]       | Road Inj<br>[0.93]  | Headaches<br>[1.51]  | Back Pain<br>[1.89] | F Body<br>[1.79]     | Asthma<br>[1.41]    | Anxiety<br>[1.18]    |
| Rio Grande do Norte           | Neonatal<br>[0.43] | Violence<br>[7.86]   | Congenital<br>[0.65] | LRI<br>[0.39]       | Road Inj<br>[0.69]  | Headaches<br>[1.46]  | Diarrhea<br>[0.7]   | Back Pain<br>[2.17]  | Iron<br>[1.06]      | Asthma<br>[1.18]     |
| Rio Grande do Sul             | Neonatal<br>[0.73] | Congenital<br>[0.78] | Violence<br>[5.89]   | Back Pain<br>[2.95] | Headaches<br>[1.56] | Road Inj<br>[0.8]    | LRI<br>[0.46]       | STI<br>[10.46]       | Asthma<br>[1.56]    | Anxiety<br>[1.22]    |
| Rondonia                      | Neonatal<br>[0.57] | Congenital<br>[0.64] | Violence<br>[4.4]    | Road Inj<br>[1.02]  | LRI<br>[0.31]       | Headaches<br>[1.58]  | Back Pain<br>[2.37] | Diarrhea<br>[0.57]   | Drown<br>[0.63]     | Asthma<br>[1.23]     |
| Roraima                       | Neonatal<br>[0.73] | Congenital<br>[0.8]  | LRI<br>[0.82]        | Violence<br>[3.99]  | Road Inj<br>[1.11]  | Diarrhea<br>[1.37]   | Headaches<br>[1.44] | Back Pain<br>[2.11]  | Drown<br>[0.91]     | Iron<br>[1.44]       |
| Santa Catarina                | Neonatal<br>[0.82] | Congenital<br>[0.8]  | Road Inj<br>[1.23]   | Headaches<br>[1.82] | Violence<br>[2.82]  | Back Pain<br>[2.14]  | LRI<br>[0.53]       | Asthma<br>[1.67]     | Anxiety<br>[1.19]   | Depression<br>[1.51] |

**eFigure 7a. Leading ten causes of DALYs with the ratio of observed DALYs to DALYs expected on the basis of Socio-Demographic Index alone in 2017, <20 years, both sexes combined.** The top ten causes contributing to DALYs are listed globally, by socio-demographic quintile, and then by GBD superregion, region, country, and subnationally where modeled. For each cell, the ratio of observed DALYs to DALYs expected on the basis of socio-demographic index (SDI) alone are listed. Abbreviations: DALY=disability-adjusted life year, GBD=Global Burden of Disease.

Values shown in brackets represent the ratio of observed DALYs to predicted DALYs on the basis of Socio-Demographic Index (SDI), rounded to two (2) digits. Color ranges (shown below) were calculated to place a roughly equal number of cells into each bin.

| COLOR KEY:                   |                                 | [0.0-0.5]                       | [0.5-0.69]           | [0.69-0.82]                   | [0.82-0.92]                     | [0.92-1.01]          | [1.01-1.18]                    | [1.18-1.48]                    | [1.48-2.26]          | 2.26+                |
|------------------------------|---------------------------------|---------------------------------|----------------------|-------------------------------|---------------------------------|----------------------|--------------------------------|--------------------------------|----------------------|----------------------|
|                              | 1                               | 2                               | 3                    | 4                             | 5                               | 6                    | 7                              | 8                              | 9                    | 10                   |
| Sao Paulo                    | Neonatal<br>[0.95]              | Congenital<br>[0.78]            | Violence<br>[3.45]   | Headaches<br>[1.44]           | Back Pain<br>[2.12]             | LRI<br>[0.75]        | Road Inj<br>[0.69]             | Asthma<br>[1.51]               | Anxiety<br>[1.15]    | Depression<br>[1.43] |
| Sergipe                      | Neonatal<br>[0.72]              | Violence<br>[7.91]              | Congenital<br>[0.64] | LRI<br>[0.42]                 | Road Inj<br>[0.97]              | Headaches<br>[1.51]  | Diarrhea<br>[0.8]              | Back Pain<br>[2.21]            | Iron<br>[1.24]       | Asthma<br>[1.31]     |
| Tocantins                    | Neonatal<br>[0.6]               | Congenital<br>[0.61]            | Violence<br>[3.75]   | Road Inj<br>[1.09]            | LRI<br>[0.27]                   | Headaches<br>[1.51]  | Back Pain<br>[2.27]            | Diarrhea<br>[0.57]             | Leish<br>[202.73]    | Iron<br>[1.12]       |
| Paraguay                     | Neonatal<br>[0.33]              | Congenital<br>[0.47]            | STI<br>[9.91]        | Road Inj<br>[0.69]            | HIV<br>[9.32]                   | LRI<br>[0.25]        | Headaches<br>[1.43]            | Diarrhea<br>[0.8]              | Asthma<br>[1.49]     | Back Pain<br>[1.41]  |
| North Africa and Middle East | Neonatal<br>[1.06]              | Congenital<br>[1.16]            | LRI<br>[1.01]        | Diarrhea<br>[2.79]            | Conflict<br>Terror<br>[1273.33] | Road Inj<br>[1.13]   | Iron<br>[1.71]                 | Headaches<br>[0.96]            | Meningitis<br>[0.79] | Anxiety<br>[1.07]    |
| Afghanistan                  | Neonatal<br>[0.53]              | LRI<br>[0.43]                   | Congenital<br>[1.02] | Diarrhea<br>[0.19]            | Meningitis<br>[0.57]            | Measles<br>[0.23]    | Whooping<br>[0.65]             | Road Inj<br>[0.61]             | Falls<br>[2.32]      | Drown<br>[0.41]      |
| Algeria                      | Neonatal<br>[1.24]              | Congenital<br>[1.64]            | Road Inj<br>[1.07]   | LRI<br>[0.66]                 | Headaches<br>[0.84]             | Diarrhea<br>[1.13]   | Asthma<br>[1.06]               | Anxiety<br>[0.95]              | Conduct<br>[0.86]    | Back Pain<br>[0.96]  |
| Bahrain                      | Neonatal<br>[0.52]              | Congenital<br>[0.61]            | Road Inj<br>[0.57]   | Headaches<br>[0.89]           | Anxiety<br>[0.98]               | Dermatitis<br>[0.89] | Conduct<br>[0.91]              | Back Pain<br>[1.01]            | Asthma<br>[0.97]     | Diarrhea<br>[1.02]   |
| Egypt                        | LRI<br>[0.98]                   | Neonatal<br>[0.4]               | Congenital<br>[0.74] | Diarrhea<br>[2.12]            | Road Inj<br>[1.24]              | Iron<br>[1.33]       | Headaches<br>[0.99]            | Asthma<br>[1.23]               | Back Pain<br>[1.27]  | Conduct<br>[0.91]    |
| Iran                         | Neonatal<br>[1.1]               | Congenital<br>[1.14]            | Road Inj<br>[1.61]   | Headaches<br>[1.25]           | LRI<br>[0.57]                   | Anxiety<br>[1.33]    | Diarrhea<br>[1.14]             | Depression<br>[1.28]           | Conduct<br>[0.98]    | Back Pain<br>[0.98]  |
| Iraq                         | Neonatal<br>[0.85]              | Conflict<br>Terror<br>[3204.14] | Congenital<br>[0.88] | LRI<br>[0.32]                 | Road Inj<br>[0.55]              | Iron<br>[1.18]       | Diarrhea<br>[0.43]             | Headaches<br>[0.94]            | Violence<br>[1.13]   | Mech<br>[2.03]       |
| Jordan                       | Neonatal<br>[1.22]              | Congenital<br>[1.24]            | LRI<br>[0.82]        | Road Inj<br>[0.79]            | Headaches<br>[0.94]             | Iron<br>[1.48]       | Asthma<br>[1.16]               | Anxiety<br>[1.05]              | Conduct<br>[0.95]    | Back Pain<br>[1.08]  |
| Kuwait                       | Neonatal<br>[0.87]              | Congenital<br>[1.16]            | Road Inj<br>[0.85]   | Headaches<br>[0.72]           | Asthma<br>[1.18]                | LRI<br>[0.94]        | Anxiety<br>[0.88]              | Conduct<br>[0.92]              | Back Pain<br>[0.92]  | Diarrhea<br>[1.87]   |
| Lebanon                      | Neonatal<br>[0.64]              | Congenital<br>[0.56]            | Headaches<br>[0.91]  | Anxiety<br>[1.18]             | Asthma<br>[1.27]                | Diarrhea<br>[1.62]   | Dermatitis<br>[0.88]           | Conflict<br>Terror<br>[509.24] | Conduct<br>[0.89]    | Road Inj<br>[0.33]   |
| Libya                        | Neonatal<br>[0.78]              | Conflict<br>Terror<br>[3442.49] | Congenital<br>[0.84] | Road Inj<br>[1.21]            | Diarrhea<br>[2.48]              | Headaches<br>[0.91]  | Oth Cardio<br>[9.11]           | LRI<br>[0.72]                  | Anxiety<br>[0.95]    | Oth Trans<br>[6.25]  |
| Morocco                      | Neonatal<br>[0.63]              | Congenital<br>[0.94]            | Road Inj<br>[0.89]   | LRI<br>[0.25]                 | Diarrhea<br>[0.66]              | Headaches<br>[1.04]  | Iron<br>[0.91]                 | Depression<br>[1.79]           | Back Pain<br>[1.47]  | Anxiety<br>[1.25]    |
| Palestine                    | Neonatal<br>[0.5]               | Congenital<br>[0.53]            | Road Inj<br>[0.42]   | Headaches<br>[0.99]           | LRI<br>[0.07]                   | Depression<br>[1.63] | Conflict<br>Terror<br>[141.66] | Anxiety<br>[1.2]               | Diarrhea<br>[0.15]   | Iron<br>[0.54]       |
| Oman                         | Neonatal<br>[1.21]              | Congenital<br>[1.01]            | Road Inj<br>[1.94]   | LRI<br>[0.66]                 | Headaches<br>[0.78]             | Iron<br>[2.12]       | Diarrhea<br>[1.67]             | Stroke<br>[3.82]               | Oth Cardio<br>[7.46] | Anxiety<br>[0.85]    |
| Qatar                        | Neonatal<br>[0.74]              | Congenital<br>[0.98]            | Road Inj<br>[1.12]   | Headaches<br>[0.77]           | Dermatitis<br>[0.88]            | Anxiety<br>[0.83]    | Conduct<br>[0.86]              | Back Pain<br>[0.89]            | Asthma<br>[0.87]     | Depression<br>[0.87] |
| Saudi Arabia                 | Neonatal<br>[1.05]              | Congenital<br>[0.79]            | Road Inj<br>[1.04]   | Headaches<br>[1.01]           | Conflict<br>Terror<br>[1133.81] | Anxiety<br>[0.98]    | Back Pain<br>[1.09]            | Conduct<br>[0.99]              | Dermatitis<br>[0.85] | Diarrhea<br>[1.87]   |
| Sudan                        | Neonatal<br>[0.97]              | Congenital<br>[1.61]            | Diarrhea<br>[0.98]   | LRI<br>[0.38]                 | Road Inj<br>[1.46]              | Iron<br>[1.22]       | Malaria<br>[32.96]             | STI<br>[1.25]                  | Whooping<br>[0.84]   | Meningitis<br>[0.22] |
| Syria                        | Conflict<br>Terror<br>[11497.8] | Neonatal<br>[0.24]              | Congenital<br>[0.34] | Iron<br>[1.25]                | Headaches<br>[1.11]             | Road Inj<br>[0.42]   | LRI<br>[0.15]                  | Whooping<br>[5.68]             | Anxiety<br>[1.31]    | Back Pain<br>[1.36]  |
| Tunisia                      | Neonatal<br>[0.64]              | Congenital<br>[0.59]            | Road Inj<br>[0.81]   | Headaches<br>[0.93]           | Anxiety<br>[1.06]               | Mech<br>[2.32]       | Conduct<br>[0.94]              | Dermatitis<br>[0.87]           | LRI<br>[0.21]        | Diarrhea<br>[0.74]   |
| Turkey                       | Neonatal<br>[1.02]              | Congenital<br>[1.03]            | Road Inj<br>[0.68]   | Headaches<br>[0.8]            | Back Pain<br>[1.24]             | LRI<br>[0.5]         | Conduct<br>[0.96]              | Epilepsy<br>[1.44]             | Depression<br>[1.12] | Anxiety<br>[0.82]    |
| UAE                          | Congenital<br>[1.79]            | Neonatal<br>[1.09]              | Road Inj<br>[1.86]   | Asthma<br>[1.41]              | Headaches<br>[0.81]             | Dermatitis<br>[0.87] | Diarrhea<br>[2.25]             | Anxiety<br>[0.82]              | Conduct<br>[0.86]    | Back Pain<br>[0.84]  |
| Yemen                        | Neonatal<br>[0.74]              | Diarrhea<br>[0.8]               | Congenital<br>[0.78] | Conflict<br>Terror<br>[684.8] | Iron<br>[3.34]                  | LRI<br>[0.24]        | Road Inj<br>[1.22]             | Vit A<br>[1.51]                | Whooping<br>[0.73]   | PEM<br>[0.31]        |

**Figure 7a. Leading ten causes of DALYs with the ratio of observed DALYs to DALYs expected on the basis of Socio-Demographic Index alone in 2017, <20 years, both sexes combined.** The top ten causes contributing to DALYs are listed globally, by socio-demographic quintile, and then by GBD superregion, region, country, and subnationally where modeled. For each cell, the ratio of observed DALYs to DALYs expected on the basis of socio-demographic index (SDI) alone are listed. Abbreviations: DALY=disability-adjusted life year, GBD=Global Burden of Disease.

Values shown in brackets represent the ratio of observed DALYs to predicted DALYs on the basis of Socio-Demographic Index (SDI), rounded to two (2) digits. Color ranges (shown below) were calculated to place a roughly equal number of cells into each bin.

| COLOR KEY:        |                           | [0.0-0.5]                   | [0.5-0.69]                  | [0.69-0.82]                 | [0.82-0.92]                       | [0.92-1.01]                         | [1.01-1.18]                        | [1.18-1.48]                       | [1.48-2.26]                       | 2.26+                       |
|-------------------|---------------------------|-----------------------------|-----------------------------|-----------------------------|-----------------------------------|-------------------------------------|------------------------------------|-----------------------------------|-----------------------------------|-----------------------------|
|                   | 1                         | 2                           | 3                           | 4                           | 5                                 | 6                                   | 7                                  | 8                                 | 9                                 | 10                          |
| <b>South Asia</b> | <b>Neonatal</b><br>[1.03] | <b>LRI</b><br>[0.7]         | <b>Diarrhea</b><br>[1.13]   | <b>Congenital</b><br>[0.48] | <b>Iron</b><br>[1.92]             | <b>Typh + Paratyph</b><br>[37.58]   | <b>Drown</b><br>[0.63]             | <b>Malaria</b><br>[126.58]        | <b>Vit A</b><br>[1.53]            | <b>Meningitis</b><br>[0.42] |
| Bangladesh        | <b>Neonatal</b><br>[0.67] | <b>LRI</b><br>[0.39]        | <b>Congenital</b><br>[0.34] | <b>Drown</b><br>[1.3]       | <b>Typh + Paratyph</b><br>[14.69] | <b>Diarrhea</b><br>[0.18]           | <b>Iron</b><br>[0.94]              | <b>STI</b><br>[0.88]              | <b>PEM</b><br>[0.41]              | <b>Headaches</b><br>[1.2]   |
| Bhutan            | <b>Neonatal</b><br>[0.77] | <b>LRI</b><br>[0.46]        | <b>Congenital</b><br>[0.46] | <b>Iron</b><br>[3.03]       | <b>Diarrhea</b><br>[0.43]         | <b>Headaches</b><br>[1.02]          | <b>Vit A</b><br>[1.35]             | <b>Mech</b><br>[2.0]              | <b>Enceph</b><br>[1.55]           | <b>Malaria</b><br>[156.8]   |
| India             | <b>Neonatal</b><br>[0.96] | <b>LRI</b><br>[0.78]        | <b>Diarrhea</b><br>[1.37]   | <b>Congenital</b><br>[0.49] | <b>Iron</b><br>[2.16]             | <b>Typh + Paratyph</b><br>[51.21]   | <b>Malaria</b><br>[209.67]         | <b>Vit A</b><br>[1.88]            | <b>PEM</b><br>[1.54]              | <b>Headaches</b><br>[1.02]  |
| Andhra Pradesh    | <b>Neonatal</b><br>[0.68] | <b>LRI</b><br>[0.29]        | <b>Congenital</b><br>[0.35] | <b>Diarrhea</b><br>[0.61]   | <b>Iron</b><br>[1.76]             | <b>Typh + Paratyph</b><br>[27.73]   | <b>Vit A</b><br>[1.55]             | <b>Headaches</b><br>[1.08]        | <b>Self Harm</b><br>[1.57]        | <b>PEM</b><br>[0.69]        |
| Arunachal Pradesh | <b>Neonatal</b><br>[0.62] | <b>LRI</b><br>[0.45]        | <b>Diarrhea</b><br>[0.8]    | <b>Iron</b><br>[1.95]       | <b>Congenital</b><br>[0.25]       | <b>Malaria</b><br>[329.54]          | <b>Vit A</b><br>[1.62]             | <b>Typh + Paratyph</b><br>[32.66] | <b>Headaches</b><br>[1.02]        | <b>Hep</b><br>[5.54]        |
| Assam             | <b>Neonatal</b><br>[1.13] | <b>LRI</b><br>[0.84]        | <b>Diarrhea</b><br>[1.45]   | <b>Congenital</b><br>[0.71] | <b>Malaria</b><br>[282.75]        | <b>Iron</b><br>[1.88]               | <b>Drown</b><br>[1.06]             | <b>Hep</b><br>[9.68]              | <b>Typh + Paratyph</b><br>[29.16] | <b>PEM</b><br>[1.24]        |
| Bihar             | <b>Neonatal</b><br>[0.64] | <b>LRI</b><br>[0.5]         | <b>Diarrhea</b><br>[0.82]   | <b>Congenital</b><br>[0.31] | <b>Iron</b><br>[1.46]             | <b>Vit A</b><br>[1.28]              | <b>Typh + Paratyph</b><br>[5.09]   | <b>Malaria</b><br>[7.49]          | <b>Drown</b><br>[0.46]            | <b>Enceph</b><br>[1.81]     |
| Chhattisgarh      | <b>Neonatal</b><br>[0.98] | <b>LRI</b><br>[0.63]        | <b>Diarrhea</b><br>[0.67]   | <b>Congenital</b><br>[0.33] | <b>Typh + Paratyph</b><br>[29.9]  | <b>Iron</b><br>[1.75]               | <b>Malaria</b><br>[124.33]         | <b>PEM</b><br>[1.21]              | <b>Drown</b><br>[0.62]            | <b>Vit A</b><br>[1.4]       |
| Delhi             | <b>Neonatal</b><br>[2.12] | <b>LRI</b><br>[2.48]        | <b>Iron</b><br>[7.92]       | <b>Congenital</b><br>[0.65] | <b>Diarrhea</b><br>[4.73]         | <b>Typh + Paratyph</b><br>[1774.67] | <b>Vit A</b><br>[3.91]             | <b>Headaches</b><br>[0.93]        | <b>PEM</b><br>[18.21]             | <b>STI</b><br>[9.75]        |
| Goa               | <b>Neonatal</b><br>[1.53] | <b>LRI</b><br>[2.75]        | <b>Congenital</b><br>[0.7]  | <b>Diarrhea</b><br>[2.86]   | <b>Headaches</b><br>[0.99]        | <b>Vit A</b><br>[3.24]              | <b>Drown</b><br>[1.2]              | <b>Iron</b><br>[1.96]             | <b>STI</b><br>[12.13]             | <b>Enceph</b><br>[6.07]     |
| Gujarat           | <b>Neonatal</b><br>[1.09] | <b>LRI</b><br>[0.71]        | <b>Congenital</b><br>[0.55] | <b>Iron</b><br>[3.76]       | <b>Diarrhea</b><br>[0.99]         | <b>Malaria</b><br>[496.36]          | <b>Vit A</b><br>[2.22]             | <b>Typh + Paratyph</b><br>[71.45] | <b>PEM</b><br>[2.13]              | <b>Headaches</b><br>[0.98]  |
| Haryana           | <b>Neonatal</b><br>[1.03] | <b>LRI</b><br>[0.99]        | <b>Iron</b><br>[4.49]       | <b>Congenital</b><br>[0.49] | <b>Diarrhea</b><br>[1.65]         | <b>Typh + Paratyph</b><br>[177.65]  | <b>Vit A</b><br>[2.56]             | <b>PEM</b><br>[3.55]              | <b>Malaria</b><br>[357.3]         | <b>Road Inj</b><br>[0.4]    |
| Himachal Pradesh  | <b>Neonatal</b><br>[1.14] | <b>LRI</b><br>[1.08]        | <b>Congenital</b><br>[0.57] | <b>Iron</b><br>[4.58]       | <b>Diarrhea</b><br>[1.56]         | <b>Typh + Paratyph</b><br>[216.74]  | <b>Vit A</b><br>[2.54]             | <b>Headaches</b><br>[0.99]        | <b>Road Inj</b><br>[0.37]         | <b>STI</b><br>[3.76]        |
| Jammu & Kashmir   | <b>Neonatal</b><br>[0.86] | <b>LRI</b><br>[0.97]        | <b>Congenital</b><br>[0.57] | <b>Diarrhea</b><br>[0.84]   | <b>Iron</b><br>[1.82]             | <b>Vit A</b><br>[2.16]              | <b>Road Inj</b><br>[0.46]          | <b>Headaches</b><br>[1.05]        | <b>Typh + Paratyph</b><br>[43.83] | <b>Conduct</b><br>[0.96]    |
| Jharkhand         | <b>Neonatal</b><br>[0.58] | <b>LRI</b><br>[0.44]        | <b>Diarrhea</b><br>[0.77]   | <b>Congenital</b><br>[0.34] | <b>Iron</b><br>[1.8]              | <b>Malaria</b><br>[50.76]           | <b>Drown</b><br>[0.73]             | <b>Vit A</b><br>[1.5]             | <b>Typh + Paratyph</b><br>[10.85] | <b>Road Inj</b><br>[0.41]   |
| Karnataka         | <b>Neonatal</b><br>[0.85] | <b>Congenital</b><br>[0.6]  | <b>LRI</b><br>[0.41]        | <b>Diarrhea</b><br>[0.7]    | <b>Iron</b><br>[1.68]             | <b>Self Harm</b><br>[3.35]          | <b>Vit A</b><br>[1.9]              | <b>Drown</b><br>[0.62]            | <b>PEM</b><br>[1.78]              | <b>Headaches</b><br>[1.0]   |
| Kerala            | <b>Neonatal</b><br>[0.59] | <b>Congenital</b><br>[0.57] | <b>LRI</b><br>[0.29]        | <b>Headaches</b><br>[0.97]  | <b>Iron</b><br>[1.36]             | <b>Vit A</b><br>[2.13]              | <b>STI</b><br>[4.32]               | <b>Self Harm</b><br>[1.21]        | <b>Conduct</b><br>[0.86]          | <b>Anxiety</b><br>[0.83]    |
| Madhya Pradesh    | <b>Neonatal</b><br>[0.77] | <b>LRI</b><br>[0.63]        | <b>Diarrhea</b><br>[0.55]   | <b>Congenital</b><br>[0.39] | <b>Iron</b><br>[2.19]             | <b>Typh + Paratyph</b><br>[23.18]   | <b>Malaria</b><br>[49.5]           | <b>PEM</b><br>[0.92]              | <b>Vit A</b><br>[1.62]            | <b>Drown</b><br>[0.6]       |
| Maharashtra       | <b>Neonatal</b><br>[0.99] | <b>LRI</b><br>[0.57]        | <b>Congenital</b><br>[0.4]  | <b>Iron</b><br>[3.09]       | <b>Diarrhea</b><br>[1.04]         | <b>Vit A</b><br>[2.29]              | <b>Typh + Paratyph</b><br>[127.04] | <b>Headaches</b><br>[1.0]         | <b>PEM</b><br>[3.59]              | <b>STI</b><br>[2.88]        |
| Manipur           | <b>Neonatal</b><br>[0.92] | <b>LRI</b><br>[0.66]        | <b>Congenital</b><br>[0.46] | <b>Diarrhea</b><br>[1.32]   | <b>Typh + Paratyph</b><br>[119.5] | <b>HIV</b><br>[7.28]                | <b>Malaria</b><br>[335.61]         | <b>Drown</b><br>[0.68]            | <b>Headaches</b><br>[1.04]        | <b>Road Inj</b><br>[0.41]   |
| Meghalaya         | <b>Neonatal</b><br>[0.87] | <b>LRI</b><br>[0.91]        | <b>Malaria</b><br>[1232.76] | <b>Congenital</b><br>[0.54] | <b>Diarrhea</b><br>[1.2]          | <b>Typh + Paratyph</b><br>[89.17]   | <b>Iron</b><br>[2.14]              | <b>Vit A</b><br>[1.79]            | <b>Meningitis</b><br>[0.47]       | <b>Headaches</b><br>[1.03]  |

**eFigure 7a. Leading ten causes of DALYs with the ratio of observed DALYs to DALYs expected on the basis of Socio-Demographic Index alone in 2017, <20 years, both sexes combined.** The top ten causes contributing to DALYs are listed globally, by socio-demographic quintile, and then by GBD superregion, region, country, and subnationally where modeled. For each cell, the ratio of observed DALYs to DALYs expected on the basis of socio-demographic index (SDI) alone are listed. Abbreviations: DALY=disability-adjusted life year, GBD=Global Burden of Disease.

Values shown in brackets represent the ratio of observed DALYs to predicted DALYs on the basis of Socio-Demographic Index (SDI), rounded to two (2) digits. Color ranges (shown below) were calculated to place a roughly equal number of cells into each bin.

| COLOR KEY:                             |                    | [0.0-0.5]            | [0.5-0.69]           | [0.69-0.82]          | [0.82-0.92]                 | [0.92-1.01]                 | [1.01-1.18]          | [1.18-1.48]                 | [1.48-2.26]                | 2.26+                |
|----------------------------------------|--------------------|----------------------|----------------------|----------------------|-----------------------------|-----------------------------|----------------------|-----------------------------|----------------------------|----------------------|
|                                        | 1                  | 2                    | 3                    | 4                    | 5                           | 6                           | 7                    | 8                           | 9                          | 10                   |
| Mizoram                                | Neonatal<br>[1.13] | LRI<br>[1.71]        | Congenital<br>[0.56] | Malaria<br>[1622.17] | Typh + Paratyph<br>[326.55] | Diarrhea<br>[1.08]          | HIV<br>[6.99]        | Headaches<br>[1.0]          | Meningitis<br>[0.64]       | Vit A<br>[1.64]      |
| Nagaland                               | Neonatal<br>[1.38] | LRI<br>[2.45]        | Malaria<br>[2520.32] | Congenital<br>[0.4]  | Diarrhea<br>[1.76]          | Typh + Paratyph<br>[348.37] | Iron<br>[2.53]       | HIV<br>[13.04]              | Hep<br>[15.58]             | Drown<br>[1.0]       |
| Odisha                                 | Neonatal<br>[0.98] | LRI<br>[0.66]        | Diarrhea<br>[1.11]   | Malaria<br>[448.51]  | Congenital<br>[0.47]        | Typh + Paratyph<br>[29.36]  | PEM<br>[1.34]        | Iron<br>[1.0]               | Vit A<br>[1.59]            | Drown<br>[0.63]      |
| Punjab                                 | Neonatal<br>[1.06] | LRI<br>[0.91]        | Congenital<br>[0.63] | Diarrhea<br>[1.89]   | Iron<br>[3.65]              | Typh + Paratyph<br>[231.07] | Vit A<br>[2.36]      | Headaches<br>[0.98]         | Road Inj<br>[0.42]         | STI<br>[2.99]        |
| Rajasthan                              | Neonatal<br>[0.83] | LRI<br>[0.92]        | Diarrhea<br>[0.53]   | Congenital<br>[0.36] | Typh + Paratyph<br>[26.54]  | Iron<br>[1.61]              | Malaria<br>[48.4]    | Vit A<br>[1.51]             | PEM<br>[0.82]              | Measles<br>[1.43]    |
| Sikkim                                 | Neonatal<br>[0.6]  | LRI<br>[0.93]        | Iron<br>[3.05]       | Congenital<br>[0.32] | Diarrhea<br>[1.32]          | Typh + Paratyph<br>[239.92] | Headaches<br>[1.05]  | Vit A<br>[2.11]             | Measles<br>[20.83]         | STI<br>[3.15]        |
| Tamil Nadu                             | Neonatal<br>[0.58] | Congenital<br>[0.43] | LRI<br>[0.38]        | Iron<br>[2.31]       | Self Harm<br>[3.5]          | Diarrhea<br>[0.9]           | Vit A<br>[2.45]      | Typh + Paratyph<br>[105.44] | Headaches<br>[0.99]        | Road Inj<br>[0.39]   |
| Telangana                              | Neonatal<br>[0.77] | Iron<br>[2.72]       | LRI<br>[0.32]        | Congenital<br>[0.34] | Diarrhea<br>[0.86]          | Typh + Paratyph<br>[62.18]  | Vit A<br>[1.94]      | Headaches<br>[1.05]         | Self Harm<br>[1.68]        | PEM<br>[1.4]         |
| Tripura                                | Neonatal<br>[0.95] | LRI<br>[0.99]        | Congenital<br>[0.61] | Diarrhea<br>[0.81]   | Malaria<br>[327.17]         | Iron<br>[1.54]              | Vit A<br>[1.71]      | Self Harm<br>[2.16]         | Headaches<br>[1.07]        | PEM<br>[1.05]        |
| Uttar Pradesh                          | Neonatal<br>[0.99] | LRI<br>[0.75]        | Diarrhea<br>[1.24]   | Congenital<br>[0.59] | Typh + Paratyph<br>[23.74]  | Iron<br>[1.88]              | PEM<br>[1.13]        | Malaria<br>[51.07]          | Meningitis<br>[0.42]       | Vit A<br>[1.58]      |
| Uttarakhand                            | Neonatal<br>[0.83] | LRI<br>[0.87]        | Congenital<br>[0.4]  | Iron<br>[3.32]       | Typh + Paratyph<br>[209.96] | Diarrhea<br>[1.18]          | Road Inj<br>[0.53]   | Vit A<br>[2.06]             | Headaches<br>[1.04]        | STI<br>[2.69]        |
| W Bengal                               | Neonatal<br>[0.68] | LRI<br>[0.49]        | Congenital<br>[0.43] | Diarrhea<br>[0.45]   | Iron<br>[1.42]              | Vit A<br>[1.69]             | Self Harm<br>[2.26]  | Drown<br>[0.56]             | Headaches<br>[1.09]        | Measles<br>[3.71]    |
| UTs other than Delhi                   | Neonatal<br>[1.48] | LRI<br>[1.22]        | Congenital<br>[0.67] | Iron<br>[3.92]       | Diarrhea<br>[1.86]          | Vit A<br>[2.75]             | Headaches<br>[1.01]  | STI<br>[6.23]               | Malaria<br>[1324.16]       | Meningitis<br>[0.86] |
| Nepal                                  | Neonatal<br>[0.47] | LRI<br>[0.31]        | Diarrhea<br>[0.16]   | Congenital<br>[0.18] | Typh + Paratyph<br>[4.35]   | Road Inj<br>[0.43]          | Iron<br>[0.7]        | Headaches<br>[1.54]         | STI<br>[0.61]              | Whooping<br>[0.39]   |
| Pakistan                               | Neonatal<br>[1.54] | LRI<br>[0.58]        | Diarrhea<br>[0.96]   | Congenital<br>[0.54] | Meningitis<br>[0.78]        | Road Inj<br>[0.92]          | Iron<br>[1.49]       | Drown<br>[0.82]             | Typh + Paratyph<br>[10.42] | TB<br>[1.35]         |
| Southeast Asia, East Asia, and Oceania | Neonatal<br>[0.78] | Congenital<br>[0.68] | LRI<br>[1.08]        | Road Inj<br>[0.75]   | Drown<br>[1.45]             | Diarrhea<br>[1.74]          | Asthma<br>[0.92]     | Headaches<br>[0.6]          | Conduct<br>[0.79]          | STI<br>[4.98]        |
| East Asia                              | Neonatal<br>[0.65] | Congenital<br>[0.62] | LRI<br>[0.9]         | Drown<br>[1.86]      | Road Inj<br>[0.75]          | F Body<br>[1.07]            | Leukemia<br>[1.05]   | Anxiety<br>[0.71]           | Conduct<br>[0.7]           | Falls<br>[1.02]      |
| China                                  | Neonatal<br>[0.63] | Congenital<br>[0.61] | LRI<br>[0.83]        | Drown<br>[1.8]       | Road Inj<br>[0.73]          | F Body<br>[1.04]            | Leukemia<br>[1.04]   | Anxiety<br>[0.71]           | Conduct<br>[0.7]           | Falls<br>[1.03]      |
| N Korea                                | Neonatal<br>[0.38] | Congenital<br>[0.53] | LRI<br>[0.39]        | Drown<br>[1.09]      | Road Inj<br>[0.78]          | Diarrhea<br>[0.34]          | F Body<br>[0.73]     | Leukemia<br>[0.92]          | Iron<br>[0.55]             | Anxiety<br>[1.06]    |
| Taiwan                                 | Neonatal<br>[0.63] | Congenital<br>[0.62] | Road Inj<br>[0.93]   | Headaches<br>[0.72]  | Asthma<br>[1.29]            | Back Pain<br>[0.88]         | Anxiety<br>[0.73]    | Conduct<br>[0.87]           | Dermatitis<br>[0.57]       | Diarrhea<br>[2.19]   |
| Oceania                                | Neonatal<br>[0.65] | Congenital<br>[0.83] | LRI<br>[0.44]        | Diarrhea<br>[0.7]    | STI<br>[4.02]               | PEM<br>[1.43]               | Meningitis<br>[0.57] | Drown<br>[0.98]             | Iron<br>[1.19]             | Asthma<br>[1.97]     |
| Am Samoa                               | Neonatal<br>[0.56] | Congenital<br>[0.36] | LRI<br>[0.73]        | Asthma<br>[1.88]     | Diarrhea<br>[1.41]          | Iron<br>[1.69]              | Drown<br>[0.97]      | Headaches<br>[0.7]          | Road Inj<br>[0.34]         | Dermatitis<br>[0.85] |
| Micronesia                             | Neonatal<br>[0.47] | Congenital<br>[0.42] | LRI<br>[0.32]        | Iron<br>[1.29]       | Road Inj<br>[0.53]          | Asthma<br>[1.52]            | Self Harm<br>[2.32]  | Whooping<br>[3.73]          | Drown<br>[0.59]            | Diarrhea<br>[0.33]   |
| Fiji                                   | Neonatal<br>[0.95] | Congenital<br>[0.94] | LRI<br>[1.05]        | Diarrhea<br>[1.89]   | Drown<br>[1.13]             | Asthma<br>[1.9]             | Iron<br>[1.75]       | Road Inj<br>[0.5]           | F Body<br>[1.13]           | Meningitis<br>[0.78] |
| Guam                                   | Neonatal<br>[1.58] | Congenital<br>[1.09] | LRI<br>[3.83]        | Self Harm<br>[2.73]  | Diarrhea<br>[4.62]          | Asthma<br>[1.9]             | Road Inj<br>[0.66]   | Dermatitis<br>[0.84]        | Headaches<br>[0.62]        | Iron<br>[2.71]       |

**eFigure 7a. Leading ten causes of DALYs with the ratio of observed DALYs to DALYs expected on the basis of Socio-Demographic Index alone in 2017, <20 years, both sexes combined.** The top ten causes contributing to DALYs are listed globally, by socio-demographic quintile, and then by GBD superregion, region, country, and subnationally where modeled. For each cell, the ratio of observed DALYs to DALYs expected on the basis of socio-demographic index (SDI) alone are listed. Abbreviations: DALY=disability-adjusted life year, GBD=Global Burden of Disease.

Values shown in brackets represent the ratio of observed DALYs to predicted DALYs on the basis of Socio-Demographic Index (SDI), rounded to two (2) digits. Color ranges (shown below) were calculated to place a roughly equal number of cells into each bin.

| COLOR KEY:                 |                    | [0.0-0.5]            | [0.5-0.69]           | [0.69-0.82]          | [0.82-0.92]          | [0.92-1.01]          | [1.01-1.18]                 | [1.18-1.48]          | [1.48-2.26]                 | 2.26+                      |
|----------------------------|--------------------|----------------------|----------------------|----------------------|----------------------|----------------------|-----------------------------|----------------------|-----------------------------|----------------------------|
|                            | 1                  | 2                    | 3                    | 4                    | 5                    | 6                    | 7                           | 8                    | 9                           | 10                         |
| Kiribati                   | Neonatal<br>[0.67] | Congenital<br>[0.88] | LRI<br>[0.2]         | Diarrhea<br>[0.28]   | PEM<br>[1.05]        | Measles<br>[1.39]    | Meningitis<br>[0.57]        | Whooping<br>[0.94]   | Iron<br>[0.91]              | Asthma<br>[1.64]           |
| Marshall                   | Neonatal<br>[0.55] | Congenital<br>[0.58] | LRI<br>[0.4]         | Road Inj<br>[0.63]   | Whooping<br>[3.37]   | Self Harm<br>[2.68]  | Iron<br>[1.04]              | Drown<br>[0.65]      | Asthma<br>[1.43]            | Measles<br>[5.48]          |
| N Mariana                  | Neonatal<br>[0.48] | Congenital<br>[0.33] | Asthma<br>[1.79]     | Self Harm<br>[2.01]  | Drown<br>[1.61]      | Road Inj<br>[0.51]   | Diarrhea<br>[2.21]          | LRI<br>[0.82]        | Headaches<br>[0.82]         | Conduct<br>[0.96]          |
| PNG                        | Neonatal<br>[0.58] | Congenital<br>[0.81] | LRI<br>[0.37]        | Diarrhea<br>[0.53]   | STI<br>[2.88]        | PEM<br>[1.01]        | Meningitis<br>[0.5]         | Drown<br>[0.96]      | Iron<br>[1.06]              | Asthma<br>[1.96]           |
| Samoa                      | Neonatal<br>[0.41] | Congenital<br>[0.36] | LRI<br>[0.27]        | Iron<br>[1.22]       | Measles<br>[11.49]   | Asthma<br>[1.45]     | Diarrhea<br>[0.34]          | Whooping<br>[3.22]   | Vit A<br>[1.28]             | Road Inj<br>[0.34]         |
| Solomon                    | Neonatal<br>[0.31] | STI<br>[4.94]        | LRI<br>[0.26]        | Congenital<br>[0.43] | Iron<br>[1.23]       | Diarrhea<br>[0.14]   | Road Inj<br>[0.5]           | Drown<br>[0.51]      | Asthma<br>[1.12]            | Vit A<br>[0.8]             |
| Tonga                      | Neonatal<br>[0.57] | LRI<br>[0.45]        | Congenital<br>[0.34] | Meningitis<br>[1.23] | Asthma<br>[2.05]     | Road Inj<br>[0.53]   | Drown<br>[0.74]             | Diarrhea<br>[0.61]   | Dermatitis<br>[0.94]        | Headaches<br>[0.68]        |
| Vanuatu                    | Neonatal<br>[0.51] | LRI<br>[0.4]         | Congenital<br>[0.6]  | STI<br>[2.79]        | Diarrhea<br>[0.24]   | Iron<br>[1.14]       | Road Inj<br>[0.56]          | Whooping<br>[1.16]   | Drown<br>[0.63]             | Asthma<br>[1.5]            |
| Southeast Asia             | Neonatal<br>[0.8]  | Congenital<br>[0.69] | LRI<br>[0.95]        | Diarrhea<br>[1.9]    | Road Inj<br>[0.73]   | Drown<br>[0.94]      | STI<br>[5.27]               | Asthma<br>[1.26]     | Meningitis<br>[0.74]        | Headaches<br>[0.84]        |
| Cambodia                   | Neonatal<br>[0.52] | LRI<br>[0.64]        | Congenital<br>[0.64] | Drown<br>[0.91]      | Iron<br>[1.31]       | Road Inj<br>[0.65]   | Diarrhea<br>[0.18]          | Mech<br>[3.02]       | Malaria<br>[27.58]          | Headaches<br>[0.9]         |
| Indonesia                  | Neonatal<br>[0.86] | Congenital<br>[0.56] | Diarrhea<br>[3.0]    | LRI<br>[0.72]        | STI<br>[11.26]       | Road Inj<br>[0.79]   | Dengue<br>[60.02]           | Measles<br>[57.05]   | Typh + Paratyph<br>[224.96] | Meningitis<br>[0.87]       |
| Laos                       | Neonatal<br>[1.15] | LRI<br>[1.4]         | Congenital<br>[1.23] | Diarrhea<br>[1.34]   | Road Inj<br>[1.13]   | Meningitis<br>[0.73] | Drown<br>[0.97]             | TB<br>[1.75]         | Whooping<br>[1.51]          | Typh + Paratyph<br>[14.38] |
| Malaysia                   | Neonatal<br>[0.57] | Congenital<br>[0.63] | Road Inj<br>[1.01]   | HIV<br>[22.49]       | LRI<br>[0.85]        | Headaches<br>[0.75]  | Depression<br>[1.34]        | Dermatitis<br>[0.93] | Diarrhea<br>[1.84]          | Conduct<br>[0.9]           |
| Maldives                   | Neonatal<br>[0.47] | Congenital<br>[0.35] | Headaches<br>[0.77]  | Iron<br>[1.03]       | Dermatitis<br>[0.94] | Asthma<br>[0.95]     | Dengue<br>[32.58]           | Conduct<br>[0.86]    | Drown<br>[0.5]              | Road Inj<br>[0.26]         |
| Mauritius                  | Neonatal<br>[0.91] | Congenital<br>[0.65] | Iron<br>[3.11]       | Road Inj<br>[0.53]   | LRI<br>[0.55]        | Headaches<br>[0.89]  | Diarrhea<br>[1.49]          | Asthma<br>[1.23]     | Depression<br>[1.27]        | Conduct<br>[0.96]          |
| Myanmar                    | Neonatal<br>[0.81] | Congenital<br>[1.08] | LRI<br>[0.83]        | Diarrhea<br>[0.77]   | Drown<br>[1.1]       | Road Inj<br>[0.7]    | Meningitis<br>[0.59]        | Oth Un Inf<br>[3.52] | Typh + Paratyph<br>[35.45]  | Exec & Police<br>[203.21]  |
| Philippines                | Neonatal<br>[0.93] | LRI<br>[1.27]        | Congenital<br>[0.78] | Diarrhea<br>[1.45]   | Asthma<br>[2.07]     | Drown<br>[0.94]      | Meningitis<br>[0.87]        | Dengue<br>[34.06]    | Road Inj<br>[0.44]          | TB<br>[4.27]               |
| Sri Lanka                  | Neonatal<br>[0.48] | Congenital<br>[0.46] | Headaches<br>[0.81]  | Dermatitis<br>[0.89] | Self Harm<br>[1.21]  | Conduct<br>[0.9]     | Asthma<br>[0.94]            | LRI<br>[0.21]        | Typh + Paratyph<br>[249.77] | Iron<br>[0.86]             |
| Seychelles                 | Neonatal<br>[0.69] | Congenital<br>[0.7]  | LRI<br>[1.2]         | Drown<br>[1.52]      | Meningitis<br>[1.16] | Road Inj<br>[0.41]   | Headaches<br>[0.78]         | Dermatitis<br>[0.91] | Asthma<br>[0.98]            | Conduct<br>[0.86]          |
| Thailand                   | Neonatal<br>[0.4]  | Road Inj<br>[1.45]   | Congenital<br>[0.4]  | Drown<br>[1.33]      | LRI<br>[0.4]         | Headaches<br>[0.99]  | Typh + Paratyph<br>[358.85] | Dermatitis<br>[0.94] | Conduct<br>[0.95]           | Asthma<br>[0.93]           |
| Timor-Leste                | Neonatal<br>[0.62] | LRI<br>[0.59]        | Congenital<br>[0.77] | Diarrhea<br>[0.47]   | Iron<br>[1.39]       | HIV<br>[5.73]        | Drown<br>[0.67]             | Road Inj<br>[0.42]   | Meningitis<br>[0.31]        | PEM<br>[0.6]               |
| Vietnam                    | Neonatal<br>[0.33] | Congenital<br>[0.61] | LRI<br>[0.31]        | Drown<br>[1.27]      | Road Inj<br>[0.63]   | Headaches<br>[0.81]  | Conduct<br>[0.88]           | Dermatitis<br>[0.83] | Asthma<br>[0.73]            | Typh + Paratyph<br>[42.83] |
| Sub-Saharan Africa         | Neonatal<br>[0.89] | LRI<br>[0.81]        | Malaria<br>[123.33]  | Diarrhea<br>[1.18]   | Congenital<br>[0.71] | HIV<br>[11.53]       | Meningitis<br>[0.95]        | PEM<br>[1.53]        | STI<br>[1.91]               | Measles<br>[1.37]          |
| Central Sub-Saharan Africa | Neonatal<br>[0.89] | Malaria<br>[242.79]  | LRI<br>[0.83]        | Diarrhea<br>[1.16]   | Congenital<br>[1.05] | PEM<br>[1.94]        | Road Inj<br>[1.35]          | STI<br>[2.94]        | Meningitis<br>[0.72]        | Whooping<br>[1.95]         |
| Angola                     | Neonatal<br>[0.85] | Diarrhea<br>[1.47]   | LRI<br>[0.6]         | Congenital<br>[0.8]  | Malaria<br>[95.12]   | PEM<br>[2.01]        | STI<br>[2.98]               | Road Inj<br>[1.18]   | HIV<br>[7.74]               | Measles<br>[2.41]          |
| C African Rep              | Neonatal<br>[0.9]  | Diarrhea<br>[1.36]   | LRI<br>[0.79]        | Malaria<br>[9.47]    | Congenital<br>[1.03] | Road Inj<br>[2.81]   | PEM<br>[1.25]               | HIV<br>[10.35]       | Whooping<br>[1.59]          | TB<br>[1.91]               |
| Congo                      | Neonatal<br>[1.0]  | HIV<br>[52.02]       | Malaria<br>[2273.17] | Diarrhea<br>[2.91]   | Congenital<br>[0.78] | LRI<br>[0.73]        | STI<br>[9.2]                | Road Inj<br>[1.28]   | Iron<br>[1.85]              | Meningitis<br>[0.97]       |
| Congo DR                   | Malaria<br>[22.86] | Neonatal<br>[0.63]   | LRI<br>[0.57]        | Congenital<br>[0.95] | Diarrhea<br>[0.47]   | PEM<br>[0.82]        | Road Inj<br>[1.1]           | Whooping<br>[1.11]   | STI<br>[1.42]               | Meningitis<br>[0.46]       |

**eFigure 7a. Leading ten causes of DALYs with the ratio of observed DALYs to DALYs expected on the basis of Socio-Demographic Index alone in 2017, <20 years, both sexes combined.** The top ten causes contributing to DALYs are listed globally, by socio-demographic quintile, and then by GBD superregion, region, country, and subnationally where modeled. For each cell, the ratio of observed DALYs to DALYs expected on the basis of socio-demographic index (SDI) alone are listed. Abbreviations: DALY=disability-adjusted life year, GBD=Global Burden of Disease.

Values shown in brackets represent the ratio of observed DALYs to predicted DALYs on the basis of Socio-Demographic Index (SDI), rounded to two (2) digits. Color ranges (shown below) were calculated to place a roughly equal number of cells into each bin.

| COLOR KEY:                 |                       | [0.0-0.5]             | [0.5-0.69]           | [0.69-0.82]          | [0.82-0.92]          | [0.92-1.01]          | [1.01-1.18]          | [1.18-1.48]          | [1.48-2.26]          | 2.26+                        |
|----------------------------|-----------------------|-----------------------|----------------------|----------------------|----------------------|----------------------|----------------------|----------------------|----------------------|------------------------------|
|                            | 1                     | 2                     | 3                    | 4                    | 5                    | 6                    | 7                    | 8                    | 9                    | 10                           |
| Eq Guinea                  | Malaria<br>[10485.87] | Neonatal<br>[1.09]    | HIV<br>[69.0]        | Congenital<br>[0.82] | LRI<br>[0.79]        | Diarrhea<br>[2.46]   | STI<br>[15.6]        | Road Inj<br>[0.97]   | Measles<br>[40.22]   | Meningitis<br>[1.1]          |
| Gabon                      | Neonatal<br>[1.68]    | Malaria<br>[12947.65] | Congenital<br>[1.06] | LRI<br>[1.23]        | Diarrhea<br>[3.5]    | Road Inj<br>[1.33]   | Iron<br>[3.79]       | HIV<br>[21.46]       | STI<br>[13.53]       | Meningitis<br>[1.49]         |
| Eastern Sub-Saharan Africa | Neonatal<br>[0.63]    | LRI<br>[0.41]         | Diarrhea<br>[0.56]   | Congenital<br>[0.64] | HIV<br>[12.67]       | Malaria<br>[8.71]    | PEM<br>[0.82]        | Meningitis<br>[0.45] | STI<br>[1.28]        | Whooping<br>[0.78]           |
| Burundi                    | Neonatal<br>[0.5]     | Malaria<br>[4.73]     | LRI<br>[0.36]        | Congenital<br>[0.89] | Diarrhea<br>[0.35]   | PEM<br>[0.78]        | Measles<br>[0.31]    | Meningitis<br>[0.34] | TB<br>[0.76]         | HIV<br>[4.0]                 |
| Comoros                    | Neonatal<br>[0.61]    | LRI<br>[0.34]         | Congenital<br>[0.6]  | Diarrhea<br>[0.45]   | PEM<br>[0.57]        | Meningitis<br>[0.33] | Iron<br>[0.89]       | STI<br>[1.03]        | Whooping<br>[0.77]   | Road Inj<br>[0.4]            |
| Djibouti                   | Neonatal<br>[0.62]    | LRI<br>[0.51]         | Congenital<br>[0.66] | Diarrhea<br>[0.67]   | PEM<br>[1.67]        | HIV<br>[7.71]        | STI<br>[2.71]        | Whooping<br>[1.94]   | Meningitis<br>[0.49] | Road Inj<br>[0.5]            |
| Eritrea                    | Neonatal<br>[0.62]    | LRI<br>[0.55]         | Diarrhea<br>[0.82]   | Congenital<br>[0.67] | PEM<br>[1.26]        | Meningitis<br>[0.54] | TB<br>[1.51]         | HIV<br>[5.43]        | Iron<br>[1.25]       | Road Inj<br>[0.61]           |
| Ethiopia                   | Neonatal<br>[0.55]    | Diarrhea<br>[0.46]    | LRI<br>[0.28]        | Congenital<br>[0.35] | PEM<br>[0.48]        | Whooping<br>[0.75]   | Meningitis<br>[0.34] | HIV<br>[3.79]        | STI<br>[0.71]        | Measles<br>[0.24]            |
| Kenya                      | Neonatal<br>[0.65]    | Diarrhea<br>[1.4]     | LRI<br>[0.61]        | HIV<br>[18.3]        | Congenital<br>[0.59] | Meningitis<br>[0.61] | PEM<br>[1.37]        | Malaria<br>[71.49]   | INTS<br>[6.19]       | Tetanus<br>[22.63]           |
| Baringo                    | Neonatal<br>[0.45]    | Diarrhea<br>[0.78]    | LRI<br>[0.36]        | Congenital<br>[0.42] | PEM<br>[0.64]        | Meningitis<br>[0.36] | iNTS<br>[3.83]       | Leish<br>[22.38]     | HIV<br>[2.63]        | Vit A<br>[0.95]              |
| Bomet                      | Neonatal<br>[0.51]    | HIV<br>[31.72]        | Diarrhea<br>[0.68]   | LRI<br>[0.21]        | Congenital<br>[0.3]  | iNTS<br>[3.64]       | Meningitis<br>[0.23] | Dermatitis<br>[1.12] | Vit A<br>[0.7]       | Conduct<br>[1.0]             |
| Bungoma                    | Neonatal<br>[0.65]    | Diarrhea<br>[1.3]     | LRI<br>[0.51]        | Congenital<br>[0.58] | Malaria<br>[54.4]    | PEM<br>[1.01]        | Meningitis<br>[0.49] | iNTS<br>[6.16]       | Whooping<br>[1.22]   | HIV<br>[4.01]                |
| Busia                      | Neonatal<br>[0.65]    | LRI<br>[0.66]         | Diarrhea<br>[0.96]   | Malaria<br>[80.78]   | Congenital<br>[0.73] | Meningitis<br>[0.53] | PEM<br>[0.76]        | HIV<br>[4.72]        | iNTS<br>[4.99]       | Whooping<br>[0.75]           |
| Elgeyo-Marakwet            | Neonatal<br>[0.8]     | Diarrhea<br>[1.39]    | LRI<br>[0.44]        | Congenital<br>[0.52] | HIV<br>[7.13]        | Meningitis<br>[0.47] | PEM<br>[0.94]        | iNTS<br>[4.82]       | STI<br>[1.28]        | Whooping<br>[0.85]           |
| Embu                       | Neonatal<br>[0.73]    | Diarrhea<br>[2.26]    | LRI<br>[0.76]        | Congenital<br>[0.67] | HIV<br>[13.82]       | Meningitis<br>[0.77] | PEM<br>[2.17]        | iNTS<br>[6.23]       | Malaria<br>[99.64]   | Vit A<br>[1.09]              |
| Garissa                    | Neonatal<br>[0.23]    | Diarrhea<br>[0.28]    | LRI<br>[0.15]        | HIV<br>[7.11]        | Congenital<br>[0.23] | iNTS<br>[2.23]       | Tetanus<br>[2.31]    | Meningitis<br>[0.16] | Vit A<br>[0.61]      | Iron<br>[0.47]               |
| HomaBay                    | HIV<br>[54.88]        | Neonatal<br>[0.61]    | LRI<br>[0.92]        | Diarrhea<br>[1.09]   | Congenital<br>[0.96] | Malaria<br>[24.03]   | PEM<br>[1.33]        | Meningitis<br>[0.8]  | Road Inj<br>[0.92]   | iNTS<br>[6.79]               |
| Isiolo                     | Neonatal<br>[0.56]    | LRI<br>[0.67]         | Congenital<br>[0.78] | Diarrhea<br>[0.4]    | PEM<br>[0.72]        | Meningitis<br>[0.54] | HIV<br>[6.5]         | Conflict<br>[134.28] | Tetanus<br>[6.91]    | Whooping<br>[0.72]           |
| Kajiado                    | Neonatal<br>[0.58]    | Diarrhea<br>[1.01]    | LRI<br>[0.39]        | Congenital<br>[0.39] | HIV<br>[8.22]        | Meningitis<br>[0.53] | Whooping<br>[2.1]    | Vit A<br>[1.29]      | iNTS<br>[5.45]       | PEM<br>[0.94]                |
| Kakamega                   | Neonatal<br>[0.61]    | Diarrhea<br>[1.18]    | LRI<br>[0.65]        | Congenital<br>[0.68] | HIV<br>[11.95]       | Malaria<br>[36.43]   | PEM<br>[1.18]        | Meningitis<br>[0.6]  | iNTS<br>[5.32]       | Whooping<br>[0.82]           |
| Kericho                    | Neonatal<br>[0.9]     | Diarrhea<br>[1.34]    | LRI<br>[0.49]        | Congenital<br>[0.59] | HIV<br>[16.6]        | iNTS<br>[9.28]       | Meningitis<br>[0.46] | PEM<br>[1.03]        | STI<br>[1.28]        | Whooping<br>[1.16]           |
| Kiambu                     | Neonatal<br>[1.43]    | LRI<br>[1.21]         | Diarrhea<br>[2.87]   | Congenital<br>[0.96] | HIV<br>[16.85]       | Meningitis<br>[1.29] | PEM<br>[3.73]        | Whooping<br>[5.7]    | STI<br>[3.81]        | iNTS<br>[9.12]               |
| Kilifi                     | Neonatal<br>[0.58]    | Diarrhea<br>[1.33]    | LRI<br>[0.47]        | Congenital<br>[0.54] | HIV<br>[11.01]       | PEM<br>[1.08]        | Meningitis<br>[0.45] | Malaria<br>[21.04]   | Whooping<br>[0.76]   | Vit A<br>[0.97]              |
| Kirinyaga                  | Neonatal<br>[0.98]    | Diarrhea<br>[2.63]    | LRI<br>[0.93]        | Congenital<br>[0.91] | HIV<br>[11.9]        | Meningitis<br>[0.95] | PEM<br>[2.39]        | iNTS<br>[6.7]        | Malaria<br>[125.59]  | Road Inj<br>[0.42]           |
| Kisii                      | Neonatal<br>[0.9]     | Diarrhea<br>[2.15]    | LRI<br>[0.69]        | Congenital<br>[0.74] | Meningitis<br>[0.65] | HIV<br>[6.12]        | iNTS<br>[7.77]       | PEM<br>[1.15]        | STI<br>[1.46]        | Road Inj<br>[0.36]           |
| Kisumu                     | Neonatal<br>[0.79]    | HIV<br>[47.45]        | LRI<br>[0.86]        | Congenital<br>[1.0]  | Diarrhea<br>[1.17]   | Malaria<br>[219.3]   | Meningitis<br>[1.08] | iNTS<br>[14.51]      | PEM<br>[1.57]        | TB<br>[2.39]                 |
| Kitui                      | Neonatal<br>[0.47]    | Diarrhea<br>[0.83]    | HIV<br>[12.12]       | LRI<br>[0.25]        | Congenital<br>[0.33] | iNTS<br>[4.65]       | Meningitis<br>[0.3]  | PEM<br>[0.54]        | Whooping<br>[0.73]   | Typh +<br>Paratyph<br>[3.84] |
| Kwale                      | Neonatal<br>[0.53]    | Diarrhea<br>[0.56]    | LRI<br>[0.3]         | HIV<br>[9.76]        | Congenital<br>[0.39] | Malaria<br>[28.38]   | iNTS<br>[4.91]       | Meningitis<br>[0.32] | PEM<br>[0.5]         | Iron<br>[0.67]               |
| Laikipia                   | Neonatal<br>[0.65]    | HIV<br>[33.4]         | Diarrhea<br>[1.35]   | LRI<br>[0.34]        | Congenital<br>[0.37] | Meningitis<br>[0.43] | iNTS<br>[5.01]       | Dermatitis<br>[1.14] | Epilepsy<br>[1.07]   | STI<br>[1.43]                |

**eFigure 7a. Leading ten causes of DALYs with the ratio of observed DALYs to DALYs expected on the basis of Socio-Demographic Index alone in 2017, <20 years, both sexes combined.** The top ten causes contributing to DALYs are listed globally, by socio-demographic quintile, and then by GBD superregion, region, country, and subnationally where modeled. For each cell, the ratio of observed DALYs to DALYs expected on the basis of socio-demographic index (SDI) alone are listed. Abbreviations: DALY=disability-adjusted life year, GBD=Global Burden of Disease.

Values shown in brackets represent the ratio of observed DALYs to predicted DALYs on the basis of Socio-Demographic Index (SDI), rounded to two (2) digits. Color ranges (shown below) were calculated to place a roughly equal number of cells into each bin.

| COLOR KEY:   |                    | [0.0-0.5]          | [0.5-0.69]           | [0.69-0.82]          | [0.82-0.92]                     | [0.92-1.01]          | [1.01-1.18]          | [1.18-1.48]                  | [1.48-2.26]          | 2.26+                         |
|--------------|--------------------|--------------------|----------------------|----------------------|---------------------------------|----------------------|----------------------|------------------------------|----------------------|-------------------------------|
|              | 1                  | 2                  | 3                    | 4                    | 5                               | 6                    | 7                    | 8                            | 9                    | 10                            |
| Lamu         | Neonatal<br>[0.97] | LRI<br>[0.8]       | Congenital<br>[1.01] | Diarrhea<br>[0.96]   | Conflict<br>Terror<br>[1032.86] | PEM<br>[1.51]        | Meningitis<br>[0.79] | HIV<br>[6.36]                | Whooping<br>[1.56]   | Malaria<br>[23.59]            |
| Machakos     | Neonatal<br>[1.1]  | Diarrhea<br>[2.26] | HIV<br>[29.13]       | LRI<br>[0.64]        | Congenital<br>[0.7]             | Meningitis<br>[0.63] | iNTS<br>[8.37]       | PEM<br>[1.33]                | STI<br>[1.67]        | Whooping<br>[1.34]            |
| Makueni      | HIV<br>[27.61]     | Neonatal<br>[0.22] | Diarrhea<br>[0.39]   | LRI<br>[0.1]         | Congenital<br>[0.17]            | Dermatitis<br>[1.11] | Meningitis<br>[0.17] | Typh +<br>Paratyph<br>[3.95] | Conduct<br>[1.06]    | Epilepsy<br>[0.87]            |
| Mandera      | Diarrhea<br>[0.24] | Neonatal<br>[0.13] | LRI<br>[0.16]        | HIV<br>[4.69]        | PEM<br>[0.24]                   | Congenital<br>[0.16] | Tetanus<br>[1.8]     | Meningitis<br>[0.18]         | iNTS<br>[1.48]       | Vit A<br>[0.69]               |
| Marsabit     | Neonatal<br>[0.47] | Diarrhea<br>[0.47] | LRI<br>[0.3]         | HIV<br>[13.28]       | Congenital<br>[0.39]            | Tetanus<br>[5.09]    | PEM<br>[0.43]        | Meningitis<br>[0.26]         | iNTS<br>[1.98]       | Measles<br>[0.14]             |
| Meru         | Neonatal<br>[0.87] | Diarrhea<br>[2.21] | LRI<br>[0.9]         | HIV<br>[25.36]       | Congenital<br>[0.82]            | PEM<br>[2.29]        | Meningitis<br>[0.87] | Malaria<br>[80.84]           | TB<br>[1.7]          | iNTS<br>[5.4]                 |
| Migori       | Neonatal<br>[0.76] | LRI<br>[0.94]      | HIV<br>[41.75]       | Diarrhea<br>[1.31]   | Congenital<br>[1.03]            | Malaria<br>[20.8]    | PEM<br>[1.25]        | Meningitis<br>[0.78]         | iNTS<br>[5.78]       | TB<br>[1.29]                  |
| Mombasa      | Neonatal<br>[1.09] | LRI<br>[1.21]      | Diarrhea<br>[3.19]   | Congenital<br>[0.95] | HIV<br>[13.71]                  | Meningitis<br>[1.29] | PEM<br>[4.25]        | iNTS<br>[17.14]              | Whooping<br>[4.59]   | STI<br>[2.95]                 |
| Murang'a     | Neonatal<br>[0.71] | LRI<br>[0.72]      | Congenital<br>[0.84] | HIV<br>[20.28]       | Diarrhea<br>[0.61]              | Meningitis<br>[0.95] | Whooping<br>[3.41]   | iNTS<br>[7.01]               | PEM<br>[1.22]        | Road Inj<br>[0.39]            |
| Nairobi      | Neonatal<br>[1.4]  | LRI<br>[1.77]      | Congenital<br>[0.81] | Diarrhea<br>[3.65]   | Meningitis<br>[2.13]            | HIV<br>[15.96]       | STI<br>[13.11]       | PEM<br>[12.65]               | Dermatitis<br>[1.36] | Road Inj<br>[0.5]             |
| Nakuru       | Neonatal<br>[0.76] | LRI<br>[0.85]      | Diarrhea<br>[1.85]   | Congenital<br>[0.77] | HIV<br>[16.63]                  | Meningitis<br>[0.84] | PEM<br>[2.53]        | Epilepsy<br>[1.41]           | iNTS<br>[5.19]       | Typh +<br>Paratyph<br>[18.92] |
| Nandi        | Neonatal<br>[0.58] | Diarrhea<br>[0.97] | HIV<br>[14.77]       | LRI<br>[0.32]        | Congenital<br>[0.39]            | iNTS<br>[6.31]       | Meningitis<br>[0.35] | Malaria<br>[40.52]           | PEM<br>[0.61]        | Dermatitis<br>[1.13]          |
| Narok        | Neonatal<br>[0.22] | Diarrhea<br>[0.27] | LRI<br>[0.15]        | Congenital<br>[0.21] | Vit A<br>[0.96]                 | HIV<br>[2.39]        | Meningitis<br>[0.2]  | iNTS<br>[2.12]               | PEM<br>[0.2]         | Typh +<br>Paratyph<br>[1.81]  |
| Nyamira      | Neonatal<br>[0.84] | Diarrhea<br>[1.43] | LRI<br>[0.51]        | Congenital<br>[0.57] | HIV<br>[17.87]                  | Meningitis<br>[0.69] | iNTS<br>[8.36]       | Road Inj<br>[0.51]           | Epilepsy<br>[1.56]   | STI<br>[1.75]                 |
| Nyandarua    | Neonatal<br>[0.94] | LRI<br>[0.99]      | Diarrhea<br>[2.0]    | Congenital<br>[0.86] | HIV<br>[13.43]                  | Meningitis<br>[1.08] | PEM<br>[2.24]        | Whooping<br>[2.95]           | TB<br>[2.6]          | Road Inj<br>[0.51]            |
| Nyeri        | Neonatal<br>[0.84] | LRI<br>[1.15]      | Congenital<br>[0.91] | Diarrhea<br>[1.84]   | HIV<br>[23.9]                   | Meningitis<br>[1.38] | PEM<br>[3.47]        | Whooping<br>[5.14]           | TB<br>[2.98]         | Road Inj<br>[0.47]            |
| Samburu      | Neonatal<br>[0.32] | HIV<br>[20.5]      | Diarrhea<br>[0.29]   | LRI<br>[0.17]        | Congenital<br>[0.23]            | Tetanus<br>[2.75]    | PEM<br>[0.21]        | Meningitis<br>[0.15]         | iNTS<br>[1.58]       | Whooping<br>[0.27]            |
| Siaya        | Neonatal<br>[0.6]  | LRI<br>[0.68]      | Diarrhea<br>[1.08]   | Malaria<br>[125.7]   | Congenital<br>[0.8]             | HIV<br>[17.92]       | Meningitis<br>[0.56] | iNTS<br>[6.14]               | PEM<br>[0.76]        | Vit A<br>[1.02]               |
| TaitaTaveta  | Neonatal<br>[0.56] | HIV<br>[28.05]     | LRI<br>[0.64]        | Diarrhea<br>[1.44]   | Congenital<br>[0.58]            | Meningitis<br>[0.81] | PEM<br>[2.1]         | iNTS<br>[8.94]               | Malaria<br>[126.96]  | Whooping<br>[1.99]            |
| TanaRiver    | Neonatal<br>[0.68] | LRI<br>[0.47]      | HIV<br>[19.32]       | Diarrhea<br>[0.51]   | Congenital<br>[0.57]            | PEM<br>[0.88]        | Tetanus<br>[9.32]    | Meningitis<br>[0.44]         | iNTS<br>[4.65]       | TB<br>[0.81]                  |
| TharakaNithi | Diarrhea<br>[4.65] | Neonatal<br>[1.01] | LRI<br>[1.28]        | Congenital<br>[1.02] | PEM<br>[4.92]                   | Meningitis<br>[1.21] | iNTS<br>[9.89]       | Malaria<br>[154.59]          | TB<br>[2.57]         | Road Inj<br>[0.48]            |
| TransNzoia   | Neonatal<br>[0.44] | Diarrhea<br>[1.26] | HIV<br>[26.68]       | LRI<br>[0.39]        | Congenital<br>[0.37]            | PEM<br>[1.01]        | Meningitis<br>[0.44] | iNTS<br>[5.7]                | Whooping<br>[1.13]   | Malaria<br>[34.63]            |
| Turkana      | Neonatal<br>[0.3]  | Diarrhea<br>[0.36] | HIV<br>[16.81]       | LRI<br>[0.22]        | Congenital<br>[0.32]            | Tetanus<br>[2.83]    | PEM<br>[0.34]        | Meningitis<br>[0.22]         | Malaria<br>[0.31]    | TB<br>[0.33]                  |
| UasinGishu   | Neonatal<br>[0.69] | Diarrhea<br>[2.24] | LRI<br>[0.58]        | Congenital<br>[0.54] | HIV<br>[13.01]                  | Meningitis<br>[0.63] | PEM<br>[1.71]        | Dermatitis<br>[1.64]         | iNTS<br>[6.04]       | Vit A<br>[1.0]                |
| Vihiga       | Neonatal<br>[0.32] | Diarrhea<br>[0.58] | LRI<br>[0.28]        | Congenital<br>[0.36] | Malaria<br>[44.31]              | HIV<br>[5.08]        | Meningitis<br>[0.39] | Road Inj<br>[0.36]           | Vit A<br>[0.98]      | iNTS<br>[3.56]                |
| Wajir        | Neonatal<br>[0.25] | Diarrhea<br>[0.3]  | LRI<br>[0.18]        | Congenital<br>[0.27] | Tetanus<br>[1.63]               | Measles<br>[0.1]     | PEM<br>[0.14]        | Meningitis<br>[0.17]         | iNTS<br>[1.59]       | HIV<br>[2.86]                 |
| WestPokot    | Neonatal<br>[0.41] | Diarrhea<br>[0.76] | LRI<br>[0.27]        | Congenital<br>[0.32] | HIV<br>[4.74]                   | PEM<br>[0.48]        | Tetanus<br>[6.13]    | Leish<br>[11.5]              | Meningitis<br>[0.25] | iNTS<br>[3.14]                |
| Madagascar   | Neonatal<br>[0.55] | Diarrhea<br>[0.81] | LRI<br>[0.49]        | PEM<br>[1.48]        | Congenital<br>[0.6]             | Malaria<br>[1.52]    | STI<br>[1.29]        | Measles<br>[0.32]            | Meningitis<br>[0.32] | Whooping<br>[0.44]            |
| Malawi       | Neonatal<br>[0.57] | HIV<br>[29.59]     | LRI<br>[0.29]        | Congenital<br>[0.67] | Malaria<br>[4.87]               | Diarrhea<br>[0.29]   | STI<br>[1.23]        | PEM<br>[0.46]                | Meningitis<br>[0.4]  | Iron<br>[1.19]                |

**eFigure 7a. Leading ten causes of DALYs with the ratio of observed DALYs to DALYs expected on the basis of Socio-Demographic Index alone in 2017, <20 years, both sexes combined.** The top ten causes contributing to DALYs are listed globally, by socio-demographic quintile, and then by GBD superregion, region, country, and subnationally where modeled. For each cell, the ratio of observed DALYs to DALYs expected on the basis of socio-demographic index (SDI) alone are listed. Abbreviations: DALY=disability-adjusted life year, GBD=Global Burden of Disease.

Values shown in brackets represent the ratio of observed DALYs to predicted DALYs on the basis of Socio-Demographic Index (SDI), rounded to two (2) digits. Color ranges (shown below) were calculated to place a roughly equal number of cells into each bin.

| COLOR KEY:                  |                    | [0.0-0.5]            | [0.5-0.69]           | [0.69-0.82]          | [0.82-0.92]          | [0.92-1.01]          | [1.01-1.18]          | [1.18-1.48]                   | [1.48-2.26]                   | 2.26+                |
|-----------------------------|--------------------|----------------------|----------------------|----------------------|----------------------|----------------------|----------------------|-------------------------------|-------------------------------|----------------------|
|                             | 1                  | 2                    | 3                    | 4                    | 5                    | 6                    | 7                    | 8                             | 9                             | 10                   |
| Mozambique                  | HIV<br>[42.86]     | Neonatal<br>[0.52]   | Malaria<br>[6.38]    | Congenital<br>[0.68] | LRI<br>[0.22]        | Diarrhea<br>[0.25]   | STI<br>[1.06]        | Meningitis<br>[0.27]          | TB<br>[0.68]                  | Iron<br>[0.96]       |
| Rwanda                      | Neonatal<br>[0.56] | LRI<br>[0.39]        | Congenital<br>[0.75] | Diarrhea<br>[0.43]   | Malaria<br>[11.56]   | PEM<br>[0.87]        | Meningitis<br>[0.44] | HIV<br>[4.47]                 | Road Inj<br>[0.6]             | TB<br>[0.72]         |
| Somalia                     | Neonatal<br>[0.4]  | LRI<br>[0.32]        | Diarrhea<br>[0.29]   | Measles<br>[0.53]    | Whooping<br>[1.84]   | PEM<br>[0.37]        | Congenital<br>[0.34] | STI<br>[0.93]                 | Conflict<br>Terror<br>[43.35] | Meningitis<br>[0.38] |
| S Sudan                     | Neonatal<br>[0.65] | LRI<br>[0.71]        | Diarrhea<br>[0.71]   | Malaria<br>[1.25]    | PEM<br>[0.73]        | Meningitis<br>[0.68] | Congenital<br>[0.46] | Conflict<br>Terror<br>[92.22] | STI<br>[1.41]                 | Measles<br>[0.32]    |
| Tanzania                    | Neonatal<br>[0.72] | LRI<br>[0.54]        | Congenital<br>[1.14] | Malaria<br>[21.49]   | Diarrhea<br>[0.29]   | HIV<br>[8.53]        | PEM<br>[0.91]        | STI<br>[1.72]                 | Meningitis<br>[0.41]          | Iron<br>[1.22]       |
| Uganda                      | Neonatal<br>[0.65] | Malaria<br>[25.21]   | HIV<br>[18.15]       | Congenital<br>[0.65] | LRI<br>[0.25]        | Diarrhea<br>[0.33]   | STI<br>[2.13]        | Meningitis<br>[0.51]          | PEM<br>[0.51]                 | Whooping<br>[0.62]   |
| Zambia                      | Neonatal<br>[0.8]  | HIV<br>[43.79]       | LRI<br>[0.62]        | Diarrhea<br>[1.04]   | Congenital<br>[0.91] | Malaria<br>[117.17]  | PEM<br>[2.06]        | Meningitis<br>[0.77]          | STI<br>[1.92]                 | TB<br>[1.7]          |
| Southern Sub-Saharan Africa | Neonatal<br>[1.32] | HIV<br>[80.72]       | LRI<br>[1.82]        | Diarrhea<br>[5.49]   | Congenital<br>[0.44] | PEM<br>[15.24]       | TB<br>[15.23]        | Road Inj<br>[0.79]            | STI<br>[7.77]                 | Violence<br>[2.09]   |
| Botswana                    | Neonatal<br>[1.11] | Diarrhea<br>[6.44]   | LRI<br>[0.99]        | HIV<br>[22.65]       | Road Inj<br>[0.83]   | Congenital<br>[0.27] | Iron<br>[2.34]       | PEM<br>[10.1]                 | Dermatitis<br>[1.28]          | TB<br>[10.1]         |
| Lesotho                     | Neonatal<br>[0.89] | HIV<br>[61.79]       | Diarrhea<br>[1.9]    | LRI<br>[0.75]        | TB<br>[4.3]          | Congenital<br>[0.37] | Road Inj<br>[1.29]   | PEM<br>[1.78]                 | Violence<br>[2.97]            | STI<br>[1.65]        |
| Namibia                     | Neonatal<br>[1.27] | HIV<br>[85.18]       | Diarrhea<br>[4.71]   | LRI<br>[1.1]         | Congenital<br>[0.35] | Road Inj<br>[0.9]    | PEM<br>[6.82]        | TB<br>[8.82]                  | Iron<br>[1.75]                | Violence<br>[1.72]   |
| S Africa                    | Neonatal<br>[1.28] | HIV<br>[109.77]      | Diarrhea<br>[6.98]   | LRI<br>[1.67]        | Congenital<br>[0.47] | STI<br>[14.07]       | Road Inj<br>[0.84]   | Violence<br>[2.8]             | PEM<br>[14.55]                | TB<br>[14.9]         |
| Swaziland                   | HIV<br>[80.03]     | Neonatal<br>[0.91]   | Diarrhea<br>[4.5]    | LRI<br>[1.23]        | Congenital<br>[0.39] | Road Inj<br>[1.29]   | PEM<br>[4.91]        | TB<br>[7.66]                  | Violence<br>[2.07]            | Meningitis<br>[0.68] |
| Zimbabwe                    | Neonatal<br>[0.85] | LRI<br>[0.89]        | HIV<br>[20.02]       | Diarrhea<br>[0.76]   | PEM<br>[2.66]        | TB<br>[3.45]         | Congenital<br>[0.34] | Meningitis<br>[0.5]           | Malaria<br>[23.24]            | Road Inj<br>[0.46]   |
| Western Sub-Saharan Africa  | Neonatal<br>[1.0]  | Malaria<br>[162.53]  | LRI<br>[1.06]        | Diarrhea<br>[1.46]   | Congenital<br>[0.66] | Meningitis<br>[1.37] | PEM<br>[1.53]        | HIV<br>[7.1]                  | Iron<br>[1.73]                | Measles<br>[1.57]    |
| Benin                       | Neonatal<br>[0.79] | Malaria<br>[23.67]   | LRI<br>[0.47]        | Diarrhea<br>[0.61]   | Congenital<br>[0.63] | Meningitis<br>[0.56] | PEM<br>[0.71]        | Road Inj<br>[0.87]            | Measles<br>[0.55]             | INTS<br>[4.54]       |
| Burkina Faso                | Malaria<br>[5.99]  | Neonatal<br>[0.47]   | LRI<br>[0.47]        | Diarrhea<br>[0.36]   | Congenital<br>[0.81] | Meningitis<br>[0.71] | PEM<br>[0.54]        | INTS<br>[5.5]                 | Hemog<br>[3.33]               | Iron<br>[1.56]       |
| Cameroon                    | Neonatal<br>[0.73] | Malaria<br>[457.76]  | Diarrhea<br>[1.48]   | LRI<br>[0.6]         | Congenital<br>[0.56] | HIV<br>[11.8]        | Meningitis<br>[0.68] | STI<br>[2.42]                 | PEM<br>[1.2]                  | Iron<br>[1.13]       |
| Cape Verde                  | Neonatal<br>[0.73] | Congenital<br>[0.41] | LRI<br>[0.23]        | Iron<br>[1.37]       | Diarrhea<br>[0.31]   | Violence<br>[1.44]   | HIV<br>[3.81]        | Headaches<br>[1.01]           | Drown<br>[0.47]               | Epilepsy<br>[1.02]   |
| Chad                        | Diarrhea<br>[0.95] | Neonatal<br>[0.6]    | LRI<br>[0.63]        | Malaria<br>[1.06]    | PEM<br>[0.62]        | Meningitis<br>[0.67] | Congenital<br>[0.46] | Iron<br>[1.6]                 | Measles<br>[0.18]             | Whooping<br>[0.57]   |
| Cote d'Ivoire               | Neonatal<br>[0.93] | Malaria<br>[48.61]   | LRI<br>[0.61]        | Diarrhea<br>[0.85]   | Congenital<br>[0.79] | HIV<br>[8.55]        | Meningitis<br>[0.6]  | PEM<br>[0.88]                 | Iron<br>[1.42]                | INTS<br>[6.06]       |
| Gambia                      | Neonatal<br>[0.65] | LRI<br>[0.31]        | Diarrhea<br>[0.39]   | Congenital<br>[0.42] | Hemog<br>[6.72]      | Iron<br>[1.73]       | Meningitis<br>[0.47] | PEM<br>[0.65]                 | STI<br>[1.44]                 | HIV<br>[3.92]        |
| Ghana                       | Neonatal<br>[1.25] | Malaria<br>[1273.21] | Diarrhea<br>[1.38]   | LRI<br>[0.53]        | Congenital<br>[0.66] | HIV<br>[10.24]       | Meningitis<br>[0.99] | Iron<br>[2.11]                | PEM<br>[2.28]                 | STI<br>[3.23]        |
| Guinea                      | Neonatal<br>[0.65] | Malaria<br>[8.24]    | LRI<br>[0.58]        | Diarrhea<br>[0.33]   | Congenital<br>[0.65] | PEM<br>[0.72]        | Meningitis<br>[0.63] | Whooping<br>[0.94]            | INTS<br>[4.76]                | Measles<br>[0.29]    |
| Guinea-Bissau               | Neonatal<br>[0.78] | Diarrhea<br>[0.67]   | LRI<br>[0.31]        | Congenital<br>[0.61] | Measles<br>[1.15]    | HIV<br>[8.75]        | Hemog<br>[6.01]      | STI<br>[1.8]                  | Meningitis<br>[0.54]          | PEM<br>[0.52]        |
| Liberia                     | Neonatal<br>[0.44] | Malaria<br>[4.81]    | Diarrhea<br>[0.4]    | LRI<br>[0.25]        | STI<br>[2.09]        | Congenital<br>[0.44] | Measles<br>[0.65]    | Whooping<br>[0.78]            | Meningitis<br>[0.36]          | PEM<br>[0.34]        |
| Mali                        | Neonatal<br>[0.76] | Malaria<br>[3.78]    | Diarrhea<br>[0.37]   | LRI<br>[0.32]        | Congenital<br>[0.78] | PEM<br>[0.81]        | Meningitis<br>[0.72] | INTS<br>[6.26]                | STI<br>[1.14]                 | Whooping<br>[0.71]   |
| Mauritania                  | Neonatal<br>[0.77] | Diarrhea<br>[0.83]   | LRI<br>[0.42]        | Congenital<br>[0.41] | PEM<br>[1.28]        | Iron<br>[1.42]       | STI<br>[1.88]        | Meningitis<br>[0.44]          | Road Inj<br>[0.62]            | Vit A<br>[1.23]      |
| Niger                       | Malaria<br>[1.17]  | Diarrhea<br>[0.4]    | Neonatal<br>[0.33]   | LRI<br>[0.35]        | Meningitis<br>[0.83] | Congenital<br>[0.42] | PEM<br>[0.17]        | INTS<br>[2.1]                 | Measles<br>[0.09]             | Whooping<br>[0.46]   |
| Nigeria                     | Neonatal<br>[1.35] | LRI<br>[1.92]        | Malaria<br>[788.81]  | Diarrhea<br>[2.79]   | Meningitis<br>[2.39] | Congenital<br>[0.65] | PEM<br>[2.8]         | Measles<br>[6.62]             | HIV<br>[11.89]                | Iron<br>[2.24]       |

**eFigure 7a. Leading ten causes of DALYs with the ratio of observed DALYs to DALYs expected on the basis of Socio-Demographic Index alone in 2017, <20 years, both sexes combined.** The top ten causes contributing to DALYs are listed globally, by socio-demographic quintile, and then by GBD superregion, region, country, and subnationally where modeled. For each cell, the ratio of observed DALYs to DALYs expected on the basis of socio-demographic index (SDI) alone are listed. Abbreviations: DALY=disability-adjusted life year, GBD=Global Burden of Disease.

*Values shown in brackets represent the ratio of observed DALYs to predicted DALYs on the basis of Socio-Demographic Index (SDI), rounded to two (2) digits. Color ranges (shown below) were calculated to place a roughly equal number of cells into each bin.*

| COLOR KEY:        |                    | [0.0-0.5]          | (0.5-0.69]           | (0.69-0.82]          | (0.82-0.92]          | (0.92-1.01]          | (1.01-1.18]          | (1.18-1.48]     | (1.48-2.26]        | 2.26+                |
|-------------------|--------------------|--------------------|----------------------|----------------------|----------------------|----------------------|----------------------|-----------------|--------------------|----------------------|
|                   | 1                  | 2                  | 3                    | 4                    | 5                    | 6                    | 7                    | 8               | 9                  | 10                   |
| Sao Tome Principe | Neonatal<br>[0.52] | LRI<br>[0.33]      | Congenital<br>[0.48] | Diarrhea<br>[0.33]   | Other MN<br>[3.58]   | PEM<br>[0.83]        | Iron<br>[0.94]       | Vit A<br>[1.29] | Road Inj<br>[0.42] | Oth NTD<br>[3.07]    |
| Senegal           | Neonatal<br>[0.55] | Diarrhea<br>[0.5]  | LRI<br>[0.31]        | Congenital<br>[0.45] | Iron<br>[1.48]       | Meningitis<br>[0.42] | Malaria<br>[2.55]    | Hemog<br>[2.29] | PEM<br>[0.31]      | Vit A<br>[0.94]      |
| Sierra Leone      | Malaria<br>[28.23] | Neonatal<br>[0.83] | LRI<br>[0.65]        | Diarrhea<br>[0.56]   | Congenital<br>[0.95] | PEM<br>[1.05]        | Meningitis<br>[0.77] | STI<br>[1.12]   | Iron<br>[1.4]      | iNTS<br>[4.43]       |
| Togo              | Neonatal<br>[0.67] | Malaria<br>[75.86] | Diarrhea<br>[0.67]   | LRI<br>[0.33]        | Congenital<br>[0.47] | HIV<br>[6.77]        | iNTS<br>[6.43]       | Hemog<br>[3.38] | Iron<br>[1.16]     | Meningitis<br>[0.35] |

**eFigure 7b. Leading ten causes of DALYs with the ratio of observed DALYs to DALYs expected on the basis of Socio-Demographic Index alone in 2017, <1 years, both sexes combined.** The top ten causes contributing to DALYs are listed globally, by socio-demographic quintile, and then by GBD superregion, region, country, and subnationally where modeled. For each cell, the ratio of observed DALYs to DALYs expected on the basis of socio-demographic index (SDI) alone are listed. Abbreviations: DALY=disability-adjusted life year, GBD=Global Burden of Disease.

Values shown in brackets represent the ratio of observed DALYs to predicted DALYs on the basis of Socio-Demographic Index (SDI), rounded to two (2) digits. Color ranges (shown below) were calculated to place a roughly equal number of cells into each bin.

| COLOR KEY:                                       |                    | [0.0-0.33]           | [0.33-0.46]          | [0.46-0.58]          | [0.58-0.7]            | [0.7-0.84]           | [0.84-1.03]          | [1.03-1.38]          | [1.38-2.46]          | 2.46+                |
|--------------------------------------------------|--------------------|----------------------|----------------------|----------------------|-----------------------|----------------------|----------------------|----------------------|----------------------|----------------------|
|                                                  | 1                  | 2                    | 3                    | 4                    | 5                     | 6                    | 7                    | 8                    | 9                    | 10                   |
| Global                                           | Neonatal<br>[1.31] | LRI<br>[1.77]        | Congenital<br>[0.71] | Diarrhea<br>[4.95]   | Malaria<br>[53940.25] | STI<br>[6.21]        | Meningitis<br>[1.38] | PEM<br>[6.73]        | HIV<br>[8.34]        | Whooping<br>[7.53]   |
| Low SDI                                          | Neonatal<br>[0.76] | LRI<br>[0.61]        | Diarrhea<br>[0.69]   | Congenital<br>[0.67] | Malaria<br>[37.06]    | STI<br>[1.13]        | Meningitis<br>[0.5]  | PEM<br>[0.75]        | Whooping<br>[0.8]    | HIV<br>[4.73]        |
| Low-middle SDI                                   | Neonatal<br>[1.06] | LRI<br>[0.95]        | Congenital<br>[0.64] | Diarrhea<br>[1.52]   | Malaria<br>[2292.63]  | Meningitis<br>[0.91] | STI<br>[2.04]        | PEM<br>[1.34]        | HIV<br>[6.54]        | Whooping<br>[1.42]   |
| Middle SDI                                       | Neonatal<br>[0.7]  | Congenital<br>[0.55] | LRI<br>[0.83]        | Diarrhea<br>[1.47]   | STI<br>[3.89]         | F Body<br>[0.68]     | Meningitis<br>[0.39] | PEM<br>[2.4]         | HIV<br>[3.39]        | Ileus<br>[1.19]      |
| High-middle SDI                                  | Neonatal<br>[1.51] | Congenital<br>[1.17] | LRI<br>[5.01]        | F Body<br>[2.14]     | Diarrhea<br>[4.98]    | STI<br>[16.42]       | SIDS<br>[0.31]       | Meningitis<br>[1.42] | Endocrine<br>[0.87]  | Ileus<br>[3.89]      |
| High SDI                                         | Neonatal<br>[0.37] | Congenital<br>[0.35] | SIDS<br>[0.68]       | F Body<br>[0.57]     | LRI<br>[0.14]         | Diarrhea<br>[0.45]   | Endocrine<br>[0.47]  | Violence<br>[0.82]   | STI<br>[0.75]        | Oth Un Inf<br>[0.54] |
| Central Europe, Eastern Europe, and Central Asia | Neonatal<br>[1.02] | LRI<br>[4.06]        | Congenital<br>[0.65] | Diarrhea<br>[3.47]   | F Body<br>[0.9]       | SIDS<br>[0.36]       | Oth Un Inf<br>[2.68] | Meningitis<br>[0.59] | Encepha<br>[3.49]    | HIV<br>[4.88]        |
| Central Asia                                     | Neonatal<br>[1.11] | LRI<br>[3.09]        | Congenital<br>[0.62] | Diarrhea<br>[2.55]   | F Body<br>[0.67]      | Encepha<br>[2.95]    | Ileus<br>[1.85]      | Meningitis<br>[0.4]  | SIDS<br>[0.38]       | TB<br>[4.7]          |
| Armenia                                          | Neonatal<br>[0.5]  | Congenital<br>[0.57] | LRI<br>[1.09]        | Ileus<br>[2.09]      | Diarrhea<br>[0.54]    | Iron<br>[3.88]       | F Body<br>[0.3]      | SIDS<br>[0.19]       | Oth Un Inf<br>[0.56] | HIV<br>[0.97]        |
| Azerbaijan                                       | Neonatal<br>[1.89] | LRI<br>[7.22]        | Congenital<br>[1.23] | Diarrhea<br>[3.62]   | Encepha<br>[8.11]     | Endocrine<br>[2.13]  | TB<br>[13.15]        | Ileus<br>[2.68]      | F Body<br>[0.6]      | Oth Un Inf<br>[2.58] |
| Georgia                                          | Neonatal<br>[0.91] | Congenital<br>[0.37] | LRI<br>[0.39]        | Diarrhea<br>[0.51]   | Ileus<br>[1.19]       | Oth Un Inf<br>[1.05] | F Body<br>[0.18]     | Meningitis<br>[0.18] | Med Treat<br>[0.86]  | STI<br>[0.57]        |
| Kazakhstan                                       | Neonatal<br>[0.97] | Congenital<br>[0.76] | LRI<br>[1.62]        | F Body<br>[1.68]     | SIDS<br>[0.59]        | Encepha<br>[4.07]    | Diarrhea<br>[0.94]   | Oth Un Inf<br>[2.53] | Ileus<br>[2.51]      | Meningitis<br>[0.62] |
| Kyrgyzstan                                       | Neonatal<br>[0.97] | LRI<br>[0.57]        | Congenital<br>[0.42] | Diarrhea<br>[0.58]   | F Body<br>[0.47]      | SIDS<br>[0.37]       | HIV<br>[1.94]        | Meningitis<br>[0.14] | Oth Un Inf<br>[0.79] | Iron<br>[1.94]       |
| Mongolia                                         | Neonatal<br>[1.33] | LRI<br>[2.09]        | Congenital<br>[0.65] | F Body<br>[1.34]     | Diarrhea<br>[0.78]    | STI<br>[2.73]        | Encepha<br>[3.52]    | Ileus<br>[2.16]      | TB<br>[5.03]         | SIDS<br>[0.36]       |
| Tajikistan                                       | Neonatal<br>[0.75] | LRI<br>[1.4]         | Diarrhea<br>[1.72]   | Congenital<br>[0.65] | Meningitis<br>[0.36]  | Ileus<br>[1.5]       | TB<br>[1.18]         | Whooping<br>[0.82]   | SIDS<br>[0.47]       | PEM<br>[0.33]        |
| Turkmenistan                                     | Neonatal<br>[1.35] | LRI<br>[3.44]        | Congenital<br>[0.99] | Diarrhea<br>[1.6]    | Ileus<br>[4.04]       | F Body<br>[0.72]     | Encepha<br>[2.98]    | TB<br>[9.21]         | Meningitis<br>[0.48] | SIDS<br>[0.32]       |
| Uzbekistan                                       | Neonatal<br>[0.73] | LRI<br>[2.23]        | Congenital<br>[0.32] | Encepha<br>[2.95]    | Diarrhea<br>[0.29]    | F Body<br>[0.42]     | Ileus<br>[0.91]      | URI<br>[5.88]        | Oth Un Inf<br>[1.05] | TB<br>[1.92]         |
| Central Europe                                   | Neonatal<br>[0.65] | Congenital<br>[0.58] | LRI<br>[1.87]        | SIDS<br>[0.24]       | Diarrhea<br>[1.49]    | F Body<br>[0.55]     | Meningitis<br>[0.47] | Endocrine<br>[0.42]  | Vit A<br>[3.35]      | Ileus<br>[0.98]      |
| Albania                                          | Neonatal<br>[0.64] | Congenital<br>[0.7]  | LRI<br>[0.9]         | SIDS<br>[0.51]       | Oth Cardio<br>[3.66]  | F Body<br>[0.34]     | Meningitis<br>[0.28] | Ileus<br>[1.18]      | CMP<br>[1.36]        | Stroke<br>[2.4]      |
| Bosnia                                           | Neonatal<br>[0.46] | Congenital<br>[0.52] | LRI<br>[0.16]        | Whooping<br>[5.73]   | Diarrhea<br>[0.46]    | SIDS<br>[0.25]       | Meningitis<br>[0.27] | Vit A<br>[1.54]      | Stroke<br>[1.28]     | Med Treat<br>[0.83]  |
| Bulgaria                                         | Neonatal<br>[0.68] | Congenital<br>[0.68] | LRI<br>[2.09]        | Diarrhea<br>[1.9]    | F Body<br>[0.8]       | Meningitis<br>[0.71] | Endocrine<br>[0.52]  | Ileus<br>[1.56]      | Encepha<br>[2.73]    | SIDS<br>[0.14]       |
| Croatia                                          | Neonatal<br>[0.59] | Congenital<br>[0.53] | SIDS<br>[0.44]       | LRI<br>[0.31]        | Diarrhea<br>[1.18]    | Endocrine<br>[0.42]  | F Body<br>[0.24]     | Meningitis<br>[0.3]  | Ileus<br>[0.72]      | Oth Neuro<br>[0.4]   |
| Czech                                            | Neonatal<br>[0.39] | Congenital<br>[0.28] | SIDS<br>[0.32]       | LRI<br>[0.63]        | F Body<br>[0.67]      | Diarrhea<br>[1.4]    | Endocrine<br>[0.55]  | Meningitis<br>[0.38] | Oth Un Inf<br>[0.71] | Oth Neuro<br>[0.42]  |
| Hungary                                          | Neonatal<br>[0.59] | Congenital<br>[0.51] | LRI<br>[0.71]        | SIDS<br>[0.38]       | Endocrine<br>[0.73]   | Diarrhea<br>[1.24]   | F Body<br>[0.41]     | Meningitis<br>[0.48] | Oth Un Inf<br>[0.77] | Oth Neuro<br>[0.55]  |
| Macedonia                                        | Neonatal<br>[1.03] | Congenital<br>[0.47] | LRI<br>[0.77]        | Diarrhea<br>[1.23]   | SIDS<br>[0.39]        | Whooping<br>[10.12]  | Meningitis<br>[0.52] | Vit A<br>[2.62]      | Endocrine<br>[0.35]  | F Body<br>[0.18]     |
| Montenegro                                       | Neonatal<br>[0.55] | Congenital<br>[0.16] | LRI<br>[0.36]        | SIDS<br>[0.25]       | Whooping<br>[9.81]    | F Body<br>[0.36]     | Diarrhea<br>[0.51]   | Vit A<br>[2.27]      | Endocrine<br>[0.23]  | Violence<br>[0.61]   |
| Poland                                           | Neonatal<br>[0.67] | Congenital<br>[0.66] | LRI<br>[0.7]         | SIDS<br>[0.23]       | Diarrhea<br>[1.04]    | F Body<br>[0.38]     | Endocrine<br>[0.35]  | Meningitis<br>[0.4]  | Vit A<br>[3.56]      | Ileus<br>[0.84]      |
| Romania                                          | Neonatal<br>[0.61] | LRI<br>[4.3]         | Congenital<br>[0.66] | Diarrhea<br>[2.32]   | F Body<br>[1.05]      | Oth Un Inf<br>[1.7]  | STI<br>[3.08]        | Meningitis<br>[0.44] | Vit A<br>[3.64]      | Ileus<br>[1.2]       |
| Serbia                                           | Neonatal<br>[0.53] | Congenital<br>[0.32] | LRI<br>[0.26]        | SIDS<br>[0.24]       | Diarrhea<br>[0.43]    | Whooping<br>[4.4]    | Vit A<br>[2.08]      | Endocrine<br>[0.32]  | Meningitis<br>[0.18] | F Body<br>[0.15]     |
| Slovakia                                         | Neonatal<br>[0.78] | Congenital<br>[0.71] | LRI<br>[1.92]        | Diarrhea<br>[2.17]   | SIDS<br>[0.25]        | F Body<br>[0.76]     | Meningitis<br>[0.98] | Endocrine<br>[0.58]  | Ileus<br>[2.02]      | Oth Neuro<br>[0.91]  |
| Slovenia                                         | Neonatal<br>[0.34] | Congenital<br>[0.33] | SIDS<br>[0.11]       | Endocrine<br>[0.48]  | LRI<br>[0.27]         | Diarrhea<br>[1.11]   | Oth Neuro<br>[0.59]  | Vit A<br>[3.38]      | Hernia<br>[1.0]      | Iron<br>[3.33]       |

**eFigure 7b. Leading ten causes of DALYs with the ratio of observed DALYs to DALYs expected on the basis of Socio-Demographic Index alone in 2017, <1 years, both sexes combined.** The top ten causes contributing to DALYs are listed globally, by socio-demographic quintile, and then by GBD superregion, region, country, and subnationally where modeled. For each cell, the ratio of observed DALYs to DALYs expected on the basis of socio-demographic index (SDI) alone are listed. Abbreviations: DALY=disability-adjusted life year, GBD=Global Burden of Disease.

Values shown in brackets represent the ratio of observed DALYs to predicted DALYs on the basis of Socio-Demographic Index (SDI), rounded to two (2) digits. Color ranges (shown below) were calculated to place a roughly equal number of cells into each bin.

| COLOR KEY:                      |                      | [0.0-0.33]           | [0.33-0.46]      | [0.46-0.58]         | [0.58-0.7]           | [0.7-0.84]           | [0.84-1.03]          | [1.03-1.38]          | [1.38-2.46]          | 2.46+                |
|---------------------------------|----------------------|----------------------|------------------|---------------------|----------------------|----------------------|----------------------|----------------------|----------------------|----------------------|
|                                 | 1                    | 2                    | 3                | 4                   | 5                    | 6                    | 7                    | 8                    | 9                    | 10                   |
| <b>Eastern Europe</b>           | Neonatal<br>[0.64]   | Congenital<br>[0.59] | LRI<br>[1.09]    | Oth Un Inf<br>[4.7] | F Body<br>[1.06]     | HIV<br>[11.88]       | SIDS<br>[0.41]       | Diarrhea<br>[0.99]   | Meningitis<br>[0.54] | Endocrine<br>[0.49]  |
| Belarus                         | Neonatal<br>[0.52]   | Congenital<br>[0.53] | F Body<br>[1.11] | LRI<br>[0.39]       | SIDS<br>[0.4]        | Encepha<br>[4.74]    | Oth Un Inf<br>[2.2]  | Ileus<br>[1.43]      | Meningitis<br>[0.39] | Endocrine<br>[0.38]  |
| Estonia                         | Neonatal<br>[0.36]   | Congenital<br>[0.35] | LRI<br>[1.4]     | F Body<br>[1.04]    | SIDS<br>[0.2]        | Diarrhea<br>[1.6]    | Oth Un Inf<br>[2.01] | Oth Neuro<br>[0.72]  | Endocrine<br>[0.35]  | Meningitis<br>[0.44] |
| Latvia                          | Neonatal<br>[0.51]   | Congenital<br>[0.46] | SIDS<br>[1.02]   | LRI<br>[0.98]       | Oth Un Inf<br>[2.86] | Diarrhea<br>[1.24]   | F Body<br>[0.45]     | Meningitis<br>[0.49] | Endocrine<br>[0.32]  | Fire<br>[2.46]       |
| Lithuania                       | Neonatal<br>[0.47]   | Congenital<br>[0.71] | LRI<br>[1.62]    | F Body<br>[1.51]    | SIDS<br>[0.47]       | Oth Un Inf<br>[2.27] | Diarrhea<br>[1.51]   | Meningitis<br>[0.75] | Endocrine<br>[0.47]  | Ileus<br>[1.82]      |
| Moldova                         | Neonatal<br>[0.72]   | Congenital<br>[1.04] | LRI<br>[1.32]    | F Body<br>[1.26]    | SIDS<br>[0.63]       | Oth Un Inf<br>[2.16] | Diarrhea<br>[0.44]   | Meningitis<br>[0.26] | Violence<br>[1.18]   | Iron<br>[1.68]       |
| Russian Federation              | Neonatal<br>[0.63]   | Congenital<br>[0.53] | LRI<br>[1.2]     | HIV<br>[16.37]      | Oth Un Inf<br>[5.07] | SIDS<br>[0.42]       | F Body<br>[0.94]     | Diarrhea<br>[1.19]   | Meningitis<br>[0.46] | Endocrine<br>[0.4]   |
| Ukraine                         | Neonatal<br>[0.59]   | Congenital<br>[0.66] | LRI<br>[0.46]    | F Body<br>[1.15]    | Oth Un Inf<br>[3.86] | Meningitis<br>[0.62] | SIDS<br>[0.33]       | Endocrine<br>[0.78]  | Encepha<br>[2.24]    | Diarrhea<br>[0.33]   |
| <b>High-income</b>              | Neonatal<br>[0.83]   | Congenital<br>[0.63] | SIDS<br>[0.77]   | F Body<br>[1.34]    | LRI<br>[0.76]        | Diarrhea<br>[1.93]   | Endocrine<br>[0.73]  | Violence<br>[1.34]   | STI<br>[3.54]        | Meningitis<br>[0.55] |
| <b>Australasia</b>              | Neonatal<br>[0.73]   | Congenital<br>[0.54] | SIDS<br>[0.69]   | LRI<br>[0.72]       | F Body<br>[0.72]     | Endocrine<br>[0.75]  | Diarrhea<br>[1.34]   | Oth Un Inf<br>[1.29] | ALS<br>[2.26]        | Oth Neuro<br>[0.64]  |
| Australia                       | Neonatal<br>[0.74]   | Congenital<br>[0.55] | SIDS<br>[0.66]   | LRI<br>[0.75]       | Endocrine<br>[0.79]  | Diarrhea<br>[1.43]   | F Body<br>[0.46]     | ALS<br>[2.44]        | Oth Un Inf<br>[1.36] | Oth Neuro<br>[0.67]  |
| New Zealand                     | Neonatal<br>[0.67]   | Congenital<br>[0.48] | SIDS<br>[0.82]   | F Body<br>[1.69]    | LRI<br>[0.55]        | Endocrine<br>[0.57]  | Diarrhea<br>[0.91]   | Meningitis<br>[0.51] | Oth Un Inf<br>[0.96] | Violence<br>[0.79]   |
| <b>High-income Asia Pacific</b> | Neonatal<br>[0.36]   | Congenital<br>[0.44] | SIDS<br>[0.29]   | F Body<br>[0.97]    | LRI<br>[0.56]        | Diarrhea<br>[1.03]   | Endocrine<br>[0.36]  | CMP<br>[0.76]        | URI<br>[1.02]        | Violence<br>[0.61]   |
| Brunei                          | Neonatal<br>[1.15]   | Congenital<br>[1.4]  | LRI<br>[3.81]    | Endocrine<br>[2.73] | F Body<br>[2.09]     | SIDS<br>[0.44]       | CMP<br>[3.84]        | Meningitis<br>[1.26] | Road Inj<br>[2.3]    | Oth Un Inf<br>[2.11] |
| Japan                           | Congenital<br>[0.45] | Neonatal<br>[0.24]   | SIDS<br>[0.28]   | F Body<br>[0.93]    | LRI<br>[0.52]        | Diarrhea<br>[1.06]   | Endocrine<br>[0.34]  | CMP<br>[0.69]        | URI<br>[1.02]        | Violence<br>[0.6]    |
| Aichi                           | Congenital<br>[0.46] | Neonatal<br>[0.24]   | SIDS<br>[0.26]   | F Body<br>[0.95]    | LRI<br>[0.56]        | Diarrhea<br>[1.23]   | Endocrine<br>[0.36]  | ASD<br>[2.04]        | CMP<br>[0.76]        | URI<br>[1.03]        |
| Akita                           | Congenital<br>[0.35] | Neonatal<br>[0.18]   | F Body<br>[1.05] | SIDS<br>[0.25]      | LRI<br>[0.32]        | Diarrhea<br>[0.83]   | Endocrine<br>[0.31]  | CMP<br>[0.57]        | URI<br>[0.99]        | ASD<br>[1.31]        |
| Aomori                          | Congenital<br>[0.37] | Neonatal<br>[0.23]   | F Body<br>[0.74] | SIDS<br>[0.26]      | LRI<br>[0.31]        | Diarrhea<br>[0.69]   | Endocrine<br>[0.28]  | CMP<br>[0.53]        | URI<br>[0.98]        | ASD<br>[1.31]        |
| Chiba                           | Congenital<br>[0.53] | Neonatal<br>[0.27]   | SIDS<br>[0.32]   | F Body<br>[0.99]    | LRI<br>[0.55]        | Diarrhea<br>[1.04]   | Endocrine<br>[0.37]  | CMP<br>[0.8]         | Violence<br>[0.69]   | URI<br>[1.02]        |
| Ehime                           | Congenital<br>[0.31] | Neonatal<br>[0.17]   | SIDS<br>[0.25]   | F Body<br>[0.78]    | LRI<br>[0.29]        | Diarrhea<br>[0.71]   | Endocrine<br>[0.28]  | URI<br>[0.99]        | CMP<br>[0.48]        | ASD<br>[1.34]        |
| Fukui                           | Congenital<br>[0.35] | Neonatal<br>[0.19]   | F Body<br>[0.78] | SIDS<br>[0.21]      | LRI<br>[0.32]        | Diarrhea<br>[1.08]   | Endocrine<br>[0.32]  | URI<br>[1.0]         | ASD<br>[1.35]        | CMP<br>[0.48]        |
| Fukuoka                         | Congenital<br>[0.41] | Neonatal<br>[0.24]   | SIDS<br>[0.35]   | F Body<br>[0.77]    | LRI<br>[0.43]        | Diarrhea<br>[0.94]   | Endocrine<br>[0.33]  | Violence<br>[0.67]   | URI<br>[1.01]        | CMP<br>[0.55]        |
| Fukushima                       | Congenital<br>[0.37] | Neonatal<br>[0.19]   | F Body<br>[0.9]  | SIDS<br>[0.3]       | LRI<br>[0.32]        | Diarrhea<br>[0.69]   | Endocrine<br>[0.32]  | CMP<br>[0.64]        | URI<br>[0.99]        | ASD<br>[1.32]        |
| Gifu                            | Congenital<br>[0.45] | Neonatal<br>[0.24]   | F Body<br>[0.99] | SIDS<br>[0.27]      | LRI<br>[0.38]        | Diarrhea<br>[1.02]   | Endocrine<br>[0.34]  | CMP<br>[0.66]        | URI<br>[1.0]         | ASD<br>[1.34]        |
| Gunma                           | Congenital<br>[0.41] | Neonatal<br>[0.23]   | F Body<br>[0.7]  | SIDS<br>[0.2]       | LRI<br>[0.39]        | Diarrhea<br>[0.8]    | Endocrine<br>[0.3]   | CMP<br>[0.6]         | URI<br>[1.01]        | Violence<br>[0.57]   |
| Hiroshima                       | Congenital<br>[0.4]  | Neonatal<br>[0.22]   | F Body<br>[0.97] | SIDS<br>[0.25]      | LRI<br>[0.46]        | Diarrhea<br>[1.04]   | Endocrine<br>[0.31]  | CMP<br>[0.62]        | URI<br>[1.02]        | Violence<br>[0.59]   |
| Hokkaido                        | Congenital<br>[0.4]  | Neonatal<br>[0.22]   | SIDS<br>[0.36]   | F Body<br>[0.7]     | LRI<br>[0.36]        | Diarrhea<br>[0.76]   | Endocrine<br>[0.31]  | CMP<br>[0.56]        | Violence<br>[0.54]   | URI<br>[0.99]        |
| Hyogo                           | Congenital<br>[0.35] | Neonatal<br>[0.21]   | SIDS<br>[0.26]   | F Body<br>[0.88]    | LRI<br>[0.42]        | Diarrhea<br>[1.08]   | Endocrine<br>[0.32]  | CMP<br>[0.62]        | URI<br>[1.01]        | Violence<br>[0.57]   |
| Ibaraki                         | Congenital<br>[0.51] | Neonatal<br>[0.27]   | F Body<br>[0.97] | SIDS<br>[0.26]      | LRI<br>[0.46]        | Diarrhea<br>[0.99]   | Endocrine<br>[0.36]  | CMP<br>[0.75]        | Violence<br>[0.61]   | URI<br>[1.01]        |
| Ishikawa                        | Congenital<br>[0.39] | Neonatal<br>[0.21]   | F Body<br>[0.93] | SIDS<br>[0.17]      | LRI<br>[0.4]         | Diarrhea<br>[0.96]   | Endocrine<br>[0.3]   | URI<br>[1.01]        | ASD<br>[1.34]        | CMP<br>[0.5]         |
| Iwate                           | Congenital<br>[0.39] | Neonatal<br>[0.21]   | F Body<br>[0.98] | SIDS<br>[0.24]      | LRI<br>[0.32]        | Diarrhea<br>[0.68]   | Endocrine<br>[0.32]  | CMP<br>[0.53]        | URI<br>[0.98]        | ASD<br>[1.31]        |

**eFigure 7b. Leading ten causes of DALYs with the ratio of observed DALYs to DALYs expected on the basis of Socio-Demographic Index alone in 2017, <1 years, both sexes combined.** The top ten causes contributing to DALYs are listed globally, by socio-demographic quintile, and then by GBD superregion, region, country, and subnationally where modeled. For each cell, the ratio of observed DALYs to DALYs expected on the basis of socio-demographic index (SDI) alone are listed. Abbreviations: DALY=disability-adjusted life year, GBD=Global Burden of Disease.

Values shown in brackets represent the ratio of observed DALYs to predicted DALYs on the basis of Socio-Demographic Index (SDI), rounded to two (2) digits. Color ranges (shown below) were calculated to place a roughly equal number of cells into each bin.

| COLOR KEY: |                      | [0.0-0.33]         | [0.33-0.46]      | [0.46-0.58]      | [0.58-0.7]       | [0.7-0.84]         | [0.84-1.03]         | [1.03-1.38]        | [1.38-2.46]        | 2.46+              |
|------------|----------------------|--------------------|------------------|------------------|------------------|--------------------|---------------------|--------------------|--------------------|--------------------|
|            | 1                    | 2                  | 3                | 4                | 5                | 6                  | 7                   | 8                  | 9                  | 10                 |
| Kagawa     | Congenital<br>[0.37] | Neonatal<br>[0.19] | SIDS<br>[0.32]   | F Body<br>[0.96] | LRI<br>[0.4]     | Diarrhea<br>[1.04] | Endocrine<br>[0.3]  | URI<br>[1.0]       | Violence<br>[0.57] | CMP<br>[0.54]      |
| Kagoshima  | Congenital<br>[0.36] | Neonatal<br>[0.19] | F Body<br>[0.84] | LRI<br>[0.37]    | SIDS<br>[0.23]   | Diarrhea<br>[0.94] | Endocrine<br>[0.33] | CMP<br>[0.61]      | URI<br>[1.0]       | Violence<br>[0.5]  |
| Kanagawa   | Congenital<br>[0.51] | Neonatal<br>[0.27] | SIDS<br>[0.34]   | F Body<br>[0.96] | LRI<br>[0.6]     | Diarrhea<br>[0.99] | Endocrine<br>[0.34] | Violence<br>[0.8]  | CMP<br>[0.74]      | ASD<br>[1.65]      |
| Kochi      | Congenital<br>[0.37] | Neonatal<br>[0.22] | F Body<br>[1.0]  | SIDS<br>[0.33]   | LRI<br>[0.33]    | Diarrhea<br>[0.8]  | Endocrine<br>[0.33] | CMP<br>[0.63]      | Violence<br>[0.61] | URI<br>[0.98]      |
| Kumamoto   | Congenital<br>[0.29] | Neonatal<br>[0.14] | SIDS<br>[0.24]   | F Body<br>[0.56] | LRI<br>[0.25]    | Diarrhea<br>[0.68] | Endocrine<br>[0.28] | URI<br>[0.98]      | ASD<br>[1.32]      | CMP<br>[0.42]      |
| Kyoto      | Congenital<br>[0.54] | Neonatal<br>[0.29] | SIDS<br>[0.3]    | F Body<br>[0.96] | LRI<br>[0.64]    | Diarrhea<br>[1.22] | Endocrine<br>[0.37] | CMP<br>[0.72]      | Violence<br>[0.66] | URI<br>[1.02]      |
| Mie        | Congenital<br>[0.42] | Neonatal<br>[0.27] | F Body<br>[1.33] | SIDS<br>[0.34]   | LRI<br>[0.47]    | Diarrhea<br>[1.35] | Endocrine<br>[0.37] | CMP<br>[0.77]      | Violence<br>[0.63] | URI<br>[1.02]      |
| Miyagi     | Congenital<br>[0.44] | Neonatal<br>[0.23] | SIDS<br>[0.34]   | F Body<br>[0.91] | LRI<br>[0.4]     | Diarrhea<br>[0.85] | Endocrine<br>[0.33] | CMP<br>[0.72]      | URI<br>[1.01]      | Violence<br>[0.54] |
| Miyazaki   | Congenital<br>[0.34] | Neonatal<br>[0.18] | SIDS<br>[0.33]   | F Body<br>[0.83] | LRI<br>[0.32]    | Diarrhea<br>[0.72] | Endocrine<br>[0.32] | CMP<br>[0.59]      | URI<br>[0.98]      | Violence<br>[0.46] |
| Nagano     | Congenital<br>[0.3]  | Neonatal<br>[0.18] | SIDS<br>[0.22]   | F Body<br>[0.67] | LRI<br>[0.24]    | Diarrhea<br>[0.73] | Endocrine<br>[0.26] | URI<br>[1.01]      | ASD<br>[1.34]      | CMP<br>[0.45]      |
| Nagasaki   | Congenital<br>[0.33] | Neonatal<br>[0.17] | SIDS<br>[0.23]   | F Body<br>[0.57] | LRI<br>[0.26]    | Diarrhea<br>[0.62] | Endocrine<br>[0.27] | Vit A<br>[2.26]    | URI<br>[0.98]      | ASD<br>[1.31]      |
| Nara       | Congenital<br>[0.43] | Neonatal<br>[0.21] | F Body<br>[0.93] | SIDS<br>[0.25]   | LRI<br>[0.45]    | Diarrhea<br>[0.95] | Endocrine<br>[0.33] | CMP<br>[0.67]      | Violence<br>[0.62] | URI<br>[1.01]      |
| Niigata    | Congenital<br>[0.38] | Neonatal<br>[0.19] | F Body<br>[0.82] | SIDS<br>[0.21]   | LRI<br>[0.29]    | Diarrhea<br>[0.79] | Endocrine<br>[0.28] | URI<br>[1.0]       | CMP<br>[0.51]      | ASD<br>[1.33]      |
| Oita       | Congenital<br>[0.39] | Neonatal<br>[0.23] | SIDS<br>[0.24]   | F Body<br>[0.73] | LRI<br>[0.35]    | Diarrhea<br>[1.04] | Endocrine<br>[0.31] | CMP<br>[0.57]      | Violence<br>[0.57] | URI<br>[1.0]       |
| Okayama    | Congenital<br>[0.35] | Neonatal<br>[0.18] | F Body<br>[0.84] | SIDS<br>[0.23]   | LRI<br>[0.43]    | Diarrhea<br>[0.95] | Endocrine<br>[0.29] | URI<br>[1.0]       | CMP<br>[0.56]      | ASD<br>[1.34]      |
| Okinawa    | Congenital<br>[0.28] | Neonatal<br>[0.17] | SIDS<br>[0.31]   | F Body<br>[0.54] | LRI<br>[0.24]    | Diarrhea<br>[0.83] | Endocrine<br>[0.33] | Violence<br>[0.57] | Vit A<br>[2.03]    | URI<br>[0.98]      |
| Osaka      | Congenital<br>[0.43] | Neonatal<br>[0.23] | F Body<br>[0.95] | LRI<br>[0.65]    | SIDS<br>[0.17]   | Diarrhea<br>[1.09] | Endocrine<br>[0.35] | Violence<br>[0.83] | CMP<br>[0.74]      | URI<br>[1.02]      |
| Saga       | Congenital<br>[0.26] | Neonatal<br>[0.16] | F Body<br>[0.67] | SIDS<br>[0.21]   | LRI<br>[0.28]    | Diarrhea<br>[0.69] | Endocrine<br>[0.26] | Vit A<br>[2.52]    | URI<br>[0.99]      | ASD<br>[1.31]      |
| Saitama    | Congenital<br>[0.44] | Neonatal<br>[0.21] | SIDS<br>[0.28]   | F Body<br>[0.69] | LRI<br>[0.42]    | Diarrhea<br>[0.83] | Endocrine<br>[0.32] | CMP<br>[0.69]      | URI<br>[1.01]      | Violence<br>[0.52] |
| Shiga      | Congenital<br>[0.44] | Neonatal<br>[0.25] | F Body<br>[1.06] | SIDS<br>[0.23]   | LRI<br>[0.48]    | Diarrhea<br>[1.34] | Endocrine<br>[0.33] | URI<br>[1.02]      | CMP<br>[0.61]      | ASD<br>[1.38]      |
| Shimane    | Congenital<br>[0.3]  | Neonatal<br>[0.16] | SIDS<br>[0.35]   | F Body<br>[0.67] | LRI<br>[0.23]    | Diarrhea<br>[0.67] | Endocrine<br>[0.27] | URI<br>[0.98]      | Iron<br>[3.03]     | ASD<br>[1.32]      |
| Shizuoka   | Congenital<br>[0.41] | Neonatal<br>[0.22] | SIDS<br>[0.29]   | F Body<br>[0.98] | LRI<br>[0.39]    | Diarrhea<br>[0.95] | Endocrine<br>[0.34] | Iron<br>[5.34]     | CMP<br>[0.61]      | URI<br>[1.01]      |
| Tochigi    | Congenital<br>[0.47] | Neonatal<br>[0.24] | SIDS<br>[0.28]   | F Body<br>[0.87] | LRI<br>[0.5]     | Diarrhea<br>[0.99] | Endocrine<br>[0.33] | CMP<br>[0.7]       | Iron<br>[4.45]     | URI<br>[1.02]      |
| Tokushima  | Congenital<br>[0.59] | Neonatal<br>[0.34] | F Body<br>[1.34] | LRI<br>[0.64]    | SIDS<br>[0.31]   | Diarrhea<br>[1.34] | Endocrine<br>[0.41] | CMP<br>[0.84]      | Violence<br>[0.84] | Ileus<br>[0.9]     |
| Tokyo      | Congenital<br>[0.73] | Neonatal<br>[0.37] | SIDS<br>[0.29]   | LRI<br>[1.54]    | F Body<br>[1.27] | Diarrhea<br>[1.68] | Endocrine<br>[0.45] | CMP<br>[1.17]      | URI<br>[1.08]      | Violence<br>[0.77] |
| Tottori    | Congenital<br>[0.41] | Neonatal<br>[0.23] | SIDS<br>[0.35]   | F Body<br>[0.81] | LRI<br>[0.28]    | Diarrhea<br>[0.82] | Endocrine<br>[0.35] | URI<br>[0.98]      | Violence<br>[0.5]  | CMP<br>[0.48]      |
| Toyama     | Congenital<br>[0.45] | Neonatal<br>[0.23] | F Body<br>[1.22] | SIDS<br>[0.22]   | LRI<br>[0.54]    | Diarrhea<br>[1.15] | Endocrine<br>[0.34] | CMP<br>[0.61]      | URI<br>[1.02]      | ASD<br>[1.36]      |
| Wakayama   | Congenital<br>[0.39] | Neonatal<br>[0.21] | F Body<br>[0.8]  | SIDS<br>[0.25]   | LRI<br>[0.31]    | Diarrhea<br>[0.76] | Endocrine<br>[0.31] | Vit A<br>[2.83]    | Violence<br>[0.62] | CMP<br>[0.58]      |
| Yamagata   | Congenital<br>[0.43] | Neonatal<br>[0.24] | F Body<br>[0.96] | SIDS<br>[0.29]   | LRI<br>[0.32]    | Diarrhea<br>[0.74] | Endocrine<br>[0.32] | Vit A<br>[2.82]    | CMP<br>[0.61]      | URI<br>[0.99]      |
| Yamaguchi  | Congenital<br>[0.4]  | Neonatal<br>[0.23] | SIDS<br>[0.27]   | F Body<br>[0.86] | LRI<br>[0.48]    | Diarrhea<br>[0.95] | Endocrine<br>[0.35] | CMP<br>[0.65]      | Violence<br>[0.65] | URI<br>[1.0]       |
| Yamanashi  | Congenital<br>[0.39] | Neonatal<br>[0.21] | F Body<br>[0.85] | SIDS<br>[0.24]   | LRI<br>[0.38]    | Diarrhea<br>[1.0]  | Endocrine<br>[0.31] | CMP<br>[0.58]      | URI<br>[1.01]      | ASD<br>[1.34]      |

**eFigure 7b. Leading ten causes of DALYs with the ratio of observed DALYs to DALYs expected on the basis of Socio-Demographic Index alone in 2017, <1 years, both sexes combined.** The top ten causes contributing to DALYs are listed globally, by socio-demographic quintile, and then by GBD superregion, region, country, and subnationally where modeled. For each cell, the ratio of observed DALYs to DALYs expected on the basis of socio-demographic index (SDI) alone are listed. Abbreviations: DALY=disability-adjusted life year, GBD=Global Burden of Disease.

Values shown in brackets represent the ratio of observed DALYs to predicted DALYs on the basis of Socio-Demographic Index (SDI), rounded to two (2) digits. Color ranges (shown below) were calculated to place a roughly equal number of cells into each bin.

| COLOR KEY:                |                      | [0.0-0.33]           | [0.33-0.46]    | [0.46-0.58]         | [0.58-0.7]         | [0.7-0.84]           | [0.84-1.03]          | [1.03-1.38]          | [1.38-2.46]          | 2.46+                |
|---------------------------|----------------------|----------------------|----------------|---------------------|--------------------|----------------------|----------------------|----------------------|----------------------|----------------------|
|                           | 1                    | 2                    | 3              | 4                   | 5                  | 6                    | 7                    | 8                    | 9                    | 10                   |
| S Korea                   | Neonatal<br>[0.62]   | Congenital<br>[0.37] | SIDS<br>[0.34] | F Body<br>[1.05]    | LRI<br>[0.39]      | Endocrine<br>[0.38]  | Diarrhea<br>[0.93]   | Falls<br>[1.44]      | Road Inj<br>[0.92]   | Iron<br>[6.39]       |
| Singapore                 | Congenital<br>[0.31] | Neonatal<br>[0.2]    | LRI<br>[1.08]  | Iron<br>[9.47]      | SIDS<br>[0.08]     | CMP<br>[0.85]        | Endocrine<br>[0.23]  | F Body<br>[0.19]     | URI<br>[0.99]        | Falls<br>[1.1]       |
| High-income North America | Neonatal<br>[1.16]   | Congenital<br>[0.77] | SIDS<br>[1.28] | F Body<br>[2.55]    | LRI<br>[0.98]      | Diarrhea<br>[2.97]   | Violence<br>[2.93]   | Endocrine<br>[0.83]  | Oth Un Inf<br>[1.78] | CMP<br>[1.57]        |
| Canada                    | Neonatal<br>[1.05]   | Congenital<br>[0.77] | SIDS<br>[0.81] | F Body<br>[1.19]    | LRI<br>[0.85]      | Endocrine<br>[1.15]  | Diarrhea<br>[1.8]    | Oth Neuro<br>[1.28]  | Meningitis<br>[0.99] | CKD<br>[2.99]        |
| Greenland                 | Neonatal<br>[1.14]   | Congenital<br>[0.6]  | SIDS<br>[2.44] | LRI<br>[0.7]        | F Body<br>[1.69]   | Meningitis<br>[1.54] | Diarrhea<br>[2.08]   | Violence<br>[3.65]   | Endocrine<br>[0.92]  | CMP<br>[1.47]        |
| USA                       | Neonatal<br>[1.14]   | Congenital<br>[0.76] | SIDS<br>[1.32] | F Body<br>[2.59]    | LRI<br>[0.92]      | Diarrhea<br>[2.95]   | Violence<br>[3.08]   | Endocrine<br>[0.79]  | Oth Un Inf<br>[1.78] | CMP<br>[1.57]        |
| Alabama                   | Neonatal<br>[1.37]   | Congenital<br>[0.91] | SIDS<br>[2.27] | F Body<br>[3.55]    | LRI<br>[1.02]      | Diarrhea<br>[3.91]   | Violence<br>[4.95]   | Endocrine<br>[0.92]  | Oth Un Inf<br>[2.29] | Road Inj<br>[2.43]   |
| Alaska                    | Neonatal<br>[0.76]   | Congenital<br>[0.66] | SIDS<br>[2.16] | F Body<br>[5.18]    | LRI<br>[1.04]      | Diarrhea<br>[2.75]   | Violence<br>[3.02]   | Endocrine<br>[0.87]  | Oth Un Inf<br>[1.77] | CMP<br>[1.62]        |
| Arizona                   | Neonatal<br>[0.79]   | Congenital<br>[0.67] | SIDS<br>[1.0]  | F Body<br>[1.91]    | LRI<br>[0.69]      | Diarrhea<br>[2.88]   | Violence<br>[2.78]   | Oth Un Inf<br>[2.22] | Endocrine<br>[0.73]  | CMP<br>[1.23]        |
| Arkansas                  | Neonatal<br>[0.96]   | Congenital<br>[0.8]  | SIDS<br>[2.84] | F Body<br>[2.67]    | LRI<br>[0.87]      | Violence<br>[3.99]   | Diarrhea<br>[2.02]   | Endocrine<br>[0.8]   | Road Inj<br>[1.88]   | Oth Un Inf<br>[1.71] |
| California                | Neonatal<br>[0.91]   | Congenital<br>[0.67] | SIDS<br>[1.02] | F Body<br>[1.07]    | LRI<br>[0.67]      | Violence<br>[2.59]   | Diarrhea<br>[1.9]    | Endocrine<br>[0.66]  | Oth Un Inf<br>[1.5]  | CMP<br>[1.38]        |
| Colorado                  | Neonatal<br>[1.17]   | Congenital<br>[0.78] | SIDS<br>[0.97] | F Body<br>[2.51]    | LRI<br>[0.9]       | Diarrhea<br>[2.4]    | Endocrine<br>[0.71]  | Violence<br>[1.82]   | Oth Un Inf<br>[1.74] | Ileus<br>[1.98]      |
| Connecticut               | Neonatal<br>[1.41]   | Congenital<br>[0.63] | SIDS<br>[0.98] | F Body<br>[2.13]    | Diarrhea<br>[4.93] | LRI<br>[1.38]        | Endocrine<br>[0.72]  | Violence<br>[1.89]   | Oth Un Inf<br>[1.73] | CMP<br>[1.41]        |
| Delaware                  | Neonatal<br>[1.84]   | Congenital<br>[0.88] | SIDS<br>[1.6]  | F Body<br>[2.56]    | Diarrhea<br>[5.56] | LRI<br>[1.29]        | Endocrine<br>[1.23]  | Violence<br>[2.7]    | Oth Un Inf<br>[2.13] | CMP<br>[1.98]        |
| DC                        | Neonatal<br>[3.06]   | Congenital<br>[1.42] | SIDS<br>[2.98] | Violence<br>[21.67] | F Body<br>[6.57]   | LRI<br>[4.65]        | Diarrhea<br>[13.51]  | Endocrine<br>[2.53]  | Oth Un Inf<br>[6.12] | Meningitis<br>[3.38] |
| Florida                   | Neonatal<br>[1.32]   | Congenital<br>[0.82] | SIDS<br>[1.21] | F Body<br>[3.88]    | Diarrhea<br>[3.89] | LRI<br>[0.96]        | Violence<br>[4.35]   | Endocrine<br>[0.83]  | CMP<br>[2.35]        | Oth Un Inf<br>[2.01] |
| Georgia                   | Neonatal<br>[1.26]   | Congenital<br>[0.74] | SIDS<br>[2.02] | F Body<br>[2.7]     | LRI<br>[0.89]      | Violence<br>[3.91]   | Diarrhea<br>[2.67]   | Endocrine<br>[0.75]  | Oth Un Inf<br>[1.79] | CMP<br>[1.63]        |
| Hawaii                    | Neonatal<br>[1.19]   | Congenital<br>[0.67] | SIDS<br>[1.03] | F Body<br>[2.42]    | LRI<br>[1.2]       | Endocrine<br>[0.85]  | Oth Un Inf<br>[2.04] | Diarrhea<br>[1.58]   | Violence<br>[1.72]   | CMP<br>[1.6]         |
| Idaho                     | Neonatal<br>[0.67]   | Congenital<br>[0.57] | SIDS<br>[1.25] | F Body<br>[1.21]    | LRI<br>[0.38]      | Diarrhea<br>[1.34]   | Endocrine<br>[0.64]  | Oth Un Inf<br>[1.02] | Road Inj<br>[1.01]   | Ileus<br>[1.11]      |
| Illinois                  | Neonatal<br>[1.39]   | Congenital<br>[0.78] | SIDS<br>[0.93] | F Body<br>[3.43]    | LRI<br>[1.18]      | Violence<br>[3.85]   | Diarrhea<br>[3.53]   | Endocrine<br>[0.77]  | CMP<br>[1.82]        | Oth Un Inf<br>[1.75] |
| Indiana                   | Neonatal<br>[1.14]   | Congenital<br>[0.83] | SIDS<br>[1.46] | F Body<br>[3.44]    | LRI<br>[0.88]      | Diarrhea<br>[2.98]   | Violence<br>[3.05]   | Endocrine<br>[0.85]  | CMP<br>[1.57]        | Oth Un Inf<br>[1.66] |
| Iowa                      | Neonatal<br>[0.7]    | Congenital<br>[0.63] | SIDS<br>[1.44] | F Body<br>[1.6]     | LRI<br>[0.73]      | Diarrhea<br>[2.09]   | Endocrine<br>[0.73]  | Oth Un Inf<br>[1.53] | CMP<br>[1.05]        | Road Inj<br>[1.18]   |
| Kansas                    | Neonatal<br>[0.97]   | Congenital<br>[0.74] | SIDS<br>[1.36] | F Body<br>[2.09]    | LRI<br>[0.7]       | Diarrhea<br>[2.21]   | Endocrine<br>[0.76]  | Violence<br>[1.75]   | Oth Un Inf<br>[1.64] | CMP<br>[1.12]        |
| Kentucky                  | Neonatal<br>[0.95]   | Congenital<br>[0.81] | SIDS<br>[2.29] | F Body<br>[2.72]    | LRI<br>[0.7]       | Diarrhea<br>[2.37]   | Violence<br>[2.5]    | Endocrine<br>[0.85]  | Oth Un Inf<br>[1.7]  | CMP<br>[1.35]        |
| Louisiana                 | Neonatal<br>[1.24]   | Congenital<br>[0.85] | SIDS<br>[2.2]  | F Body<br>[5.13]    | LRI<br>[1.17]      | Violence<br>[5.77]   | Diarrhea<br>[2.89]   | Endocrine<br>[0.96]  | CMP<br>[2.19]        | Oth Un Inf<br>[2.03] |
| Maine                     | Neonatal<br>[1.36]   | Congenital<br>[1.02] | SIDS<br>[1.72] | F Body<br>[3.16]    | Diarrhea<br>[5.81] | LRI<br>[1.24]        | Endocrine<br>[1.22]  | CMP<br>[1.8]         | Oth Un Inf<br>[1.88] | Road Inj<br>[1.92]   |
| Maryland                  | Neonatal<br>[1.83]   | Congenital<br>[0.86] | SIDS<br>[1.78] | F Body<br>[1.9]     | Diarrhea<br>[5.15] | LRI<br>[1.37]        | Violence<br>[3.96]   | Endocrine<br>[1.04]  | Oth Un Inf<br>[2.44] | CMP<br>[1.98]        |
| Massachusetts             | Neonatal<br>[1.51]   | Congenital<br>[0.74] | SIDS<br>[0.91] | F Body<br>[1.72]    | LRI<br>[1.45]      | Diarrhea<br>[3.96]   | Endocrine<br>[0.75]  | Oth Un Inf<br>[1.72] | Violence<br>[1.43]   | CMP<br>[1.25]        |
| Michigan                  | Neonatal<br>[1.4]    | Congenital<br>[0.83] | SIDS<br>[1.24] | F Body<br>[4.28]    | LRI<br>[1.08]      | Violence<br>[4.08]   | Diarrhea<br>[3.26]   | Endocrine<br>[0.91]  | CMP<br>[1.93]        | Oth Un Inf<br>[1.79] |
| Minnesota                 | Neonatal<br>[1.03]   | Congenital<br>[0.84] | SIDS<br>[0.95] | F Body<br>[2.55]    | LRI<br>[1.04]      | Diarrhea<br>[2.58]   | Endocrine<br>[0.73]  | Oth Un Inf<br>[1.89] | Violence<br>[1.22]   | CMP<br>[1.11]        |
| Mississippi               | Neonatal<br>[1.28]   | Congenital<br>[0.92] | SIDS<br>[2.18] | F Body<br>[5.3]     | LRI<br>[1.02]      | Violence<br>[5.29]   | Diarrhea<br>[2.9]    | Road Inj<br>[2.64]   | Endocrine<br>[0.9]   | CMP<br>[2.28]        |

**eFigure 7b. Leading ten causes of DALYs with the ratio of observed DALYs to DALYs expected on the basis of Socio-Demographic Index alone in 2017, <1 years, both sexes combined.** The top ten causes contributing to DALYs are listed globally, by socio-demographic quintile, and then by GBD superregion, region, country, and subnationally where modeled. For each cell, the ratio of observed DALYs to DALYs expected on the basis of socio-demographic index (SDI) alone are listed. Abbreviations: DALY=disability-adjusted life year, GBD=Global Burden of Disease.

Values shown in brackets represent the ratio of observed DALYs to predicted DALYs on the basis of Socio-Demographic Index (SDI), rounded to two (2) digits. Color ranges (shown below) were calculated to place a roughly equal number of cells into each bin.

| COLOR KEY:             |                    | [0.0-0.33]           | (0.33-0.46]      | (0.46-0.58]         | (0.58-0.7]         | (0.7-0.84]          | (0.84-1.03]         | (1.03-1.38]          | (1.38-2.46]          | 2.46+                |
|------------------------|--------------------|----------------------|------------------|---------------------|--------------------|---------------------|---------------------|----------------------|----------------------|----------------------|
|                        | 1                  | 2                    | 3                | 4                   | 5                  | 6                   | 7                   | 8                    | 9                    | 10                   |
| Missouri               | Neonatal<br>[1.07] | Congenital<br>[0.76] | SIDS<br>[1.14]   | F Body<br>[3.96]    | LRI<br>[0.8]       | Violence<br>[3.56]  | Diarrhea<br>[2.45]  | Endocrine<br>[0.73]  | Oth Un Inf<br>[1.62] | CMP<br>[1.52]        |
| Montana                | Neonatal<br>[0.92] | Congenital<br>[0.86] | SIDS<br>[1.93]   | F Body<br>[2.24]    | LRI<br>[1.0]       | Diarrhea<br>[2.51]  | Endocrine<br>[0.9]  | Road Inj<br>[1.98]   | Oth Un Inf<br>[1.74] | Violence<br>[1.58]   |
| Nebraska               | Neonatal<br>[0.91] | Congenital<br>[0.72] | SIDS<br>[1.38]   | F Body<br>[1.53]    | LRI<br>[0.7]       | Endocrine<br>[0.75] | Diarrhea<br>[1.88]  | Oth Un Inf<br>[1.47] | Violence<br>[1.14]   | Road Inj<br>[1.06]   |
| Nevada                 | Neonatal<br>[0.79] | Congenital<br>[0.62] | SIDS<br>[0.82]   | F Body<br>[1.81]    | LRI<br>[0.71]      | Violence<br>[3.0]   | Diarrhea<br>[2.22]  | Endocrine<br>[0.57]  | CMP<br>[1.26]        | Oth Un Inf<br>[1.16] |
| New Hampshire          | Neonatal<br>[1.26] | Congenital<br>[0.77] | SIDS<br>[1.11]   | F Body<br>[2.04]    | Diarrhea<br>[5.79] | LRI<br>[1.24]       | Endocrine<br>[0.97] | Oth Un Inf<br>[1.66] | CMP<br>[1.37]        | Violence<br>[2.13]   |
| New Jersey             | Neonatal<br>[1.19] | Congenital<br>[0.64] | SIDS<br>[0.95]   | F Body<br>[1.72]    | LRI<br>[1.21]      | Diarrhea<br>[3.94]  | Endocrine<br>[0.82] | Violence<br>[2.0]    | Oth Un Inf<br>[1.78] | CMP<br>[1.45]        |
| New Mexico             | Neonatal<br>[0.79] | Congenital<br>[0.67] | SIDS<br>[0.96]   | F Body<br>[1.51]    | LRI<br>[0.59]      | Diarrhea<br>[2.45]  | Endocrine<br>[0.86] | Violence<br>[2.34]   | Ileus<br>[2.05]      | Oth Un Inf<br>[1.46] |
| New York               | Neonatal<br>[1.24] | Congenital<br>[0.71] | SIDS<br>[0.75]   | F Body<br>[2.01]    | LRI<br>[1.42]      | Diarrhea<br>[4.46]  | Violence<br>[3.34]  | Endocrine<br>[0.79]  | Oth Un Inf<br>[1.99] | CMP<br>[1.73]        |
| N Carolina             | Neonatal<br>[1.29] | Congenital<br>[0.77] | SIDS<br>[1.15]   | F Body<br>[2.58]    | LRI<br>[0.9]       | Diarrhea<br>[3.11]  | Violence<br>[3.37]  | Endocrine<br>[0.88]  | CMP<br>[1.75]        | Oth Un Inf<br>[1.78] |
| N Dakota               | Neonatal<br>[1.06] | Congenital<br>[0.91] | SIDS<br>[1.98]   | F Body<br>[2.38]    | LRI<br>[1.14]      | Endocrine<br>[1.12] | Diarrhea<br>[2.53]  | Oth Un Inf<br>[1.97] | Road Inj<br>[1.93]   | CMP<br>[1.38]        |
| Ohio                   | Neonatal<br>[1.35] | Congenital<br>[0.87] | SIDS<br>[1.61]   | F Body<br>[3.24]    | LRI<br>[0.93]      | Diarrhea<br>[3.09]  | Violence<br>[3.0]   | Endocrine<br>[0.93]  | CMP<br>[1.7]         | Oth Un Inf<br>[1.75] |
| Oklahoma               | Neonatal<br>[1.18] | Congenital<br>[0.95] | SIDS<br>[2.22]   | F Body<br>[2.55]    | LRI<br>[0.86]      | Diarrhea<br>[2.99]  | Violence<br>[3.73]  | Endocrine<br>[0.93]  | Road Inj<br>[1.99]   | CMP<br>[1.72]        |
| Oregon                 | Neonatal<br>[1.03] | Congenital<br>[0.69] | SIDS<br>[1.68]   | F Body<br>[2.01]    | LRI<br>[0.69]      | Diarrhea<br>[2.41]  | Endocrine<br>[0.93] | Violence<br>[1.69]   | Oth Un Inf<br>[1.61] | Road Inj<br>[1.32]   |
| Pennsylvania           | Neonatal<br>[1.49] | Congenital<br>[0.79] | SIDS<br>[1.26]   | F Body<br>[2.68]    | LRI<br>[1.18]      | Diarrhea<br>[3.87]  | Violence<br>[2.73]  | Endocrine<br>[0.81]  | CMP<br>[1.67]        | Oth Un Inf<br>[1.7]  |
| Rhode Island           | Neonatal<br>[1.69] | Congenital<br>[0.83] | SIDS<br>[0.96]   | Diarrhea<br>[6.71]  | F Body<br>[2.2]    | LRI<br>[1.19]       | Endocrine<br>[0.97] | Violence<br>[1.92]   | Oth Un Inf<br>[1.76] | CMP<br>[1.43]        |
| S Carolina             | Neonatal<br>[1.31] | Congenital<br>[0.74] | SIDS<br>[1.61]   | F Body<br>[4.12]    | LRI<br>[0.79]      | Violence<br>[3.65]  | Diarrhea<br>[2.61]  | Endocrine<br>[0.86]  | Oth Un Inf<br>[1.82] | CMP<br>[1.65]        |
| S Dakota               | Neonatal<br>[0.9]  | Congenital<br>[0.82] | SIDS<br>[1.81]   | F Body<br>[2.1]     | LRI<br>[1.01]      | Diarrhea<br>[3.08]  | Endocrine<br>[0.93] | Oth Un Inf<br>[1.75] | Road Inj<br>[1.88]   | Violence<br>[1.43]   |
| Tennessee              | Neonatal<br>[0.96] | Congenital<br>[0.8]  | F Body<br>[4.24] | SIDS<br>[1.33]      | LRI<br>[0.9]       | Diarrhea<br>[2.94]  | Violence<br>[3.93]  | Endocrine<br>[0.81]  | Oth Un Inf<br>[1.85] | CMP<br>[1.7]         |
| Texas                  | Neonatal<br>[0.85] | Congenital<br>[0.69] | SIDS<br>[1.34]   | F Body<br>[1.91]    | LRI<br>[0.59]      | Violence<br>[3.1]   | Diarrhea<br>[1.77]  | Endocrine<br>[0.63]  | Oth Un Inf<br>[1.7]  | CMP<br>[1.41]        |
| Utah                   | Neonatal<br>[0.65] | Congenital<br>[0.58] | SIDS<br>[0.96]   | F Body<br>[1.14]    | LRI<br>[0.45]      | Endocrine<br>[0.74] | Diarrhea<br>[1.38]  | Oth Un Inf<br>[1.26] | Ileus<br>[1.24]      | Violence<br>[0.75]   |
| Vermont                | Neonatal<br>[1.22] | Congenital<br>[0.85] | SIDS<br>[1.03]   | F Body<br>[2.1]     | Diarrhea<br>[4.89] | LRI<br>[1.06]       | Endocrine<br>[1.11] | Oth Un Inf<br>[2.0]  | CMP<br>[1.34]        | Ileus<br>[2.1]       |
| Virginia               | Neonatal<br>[1.35] | Congenital<br>[0.82] | SIDS<br>[1.61]   | F Body<br>[2.93]    | LRI<br>[1.31]      | Diarrhea<br>[4.06]  | Violence<br>[3.39]  | Endocrine<br>[0.8]   | Oth Un Inf<br>[2.03] | CMP<br>[1.75]        |
| Washington             | Neonatal<br>[0.96] | Congenital<br>[0.74] | SIDS<br>[1.57]   | F Body<br>[2.05]    | LRI<br>[0.8]       | Diarrhea<br>[2.49]  | Endocrine<br>[0.79] | Violence<br>[1.78]   | Oth Un Inf<br>[1.6]  | CMP<br>[1.18]        |
| W Virginia             | Neonatal<br>[1.05] | Congenital<br>[0.82] | SIDS<br>[2.37]   | F Body<br>[2.32]    | LRI<br>[0.75]      | Diarrhea<br>[2.96]  | Endocrine<br>[1.16] | Violence<br>[2.55]   | Oth Un Inf<br>[1.64] | CMP<br>[1.55]        |
| Wisconsin              | Neonatal<br>[1.2]  | Congenital<br>[0.78] | SIDS<br>[1.18]   | F Body<br>[2.18]    | LRI<br>[1.03]      | Diarrhea<br>[2.7]   | Endocrine<br>[0.78] | Violence<br>[1.72]   | Oth Un Inf<br>[1.85] | CMP<br>[1.42]        |
| Wyoming                | Neonatal<br>[1.21] | Congenital<br>[0.77] | SIDS<br>[1.36]   | F Body<br>[2.32]    | LRI<br>[0.97]      | Diarrhea<br>[2.2]   | Endocrine<br>[0.86] | Oth Un Inf<br>[1.74] | Road Inj<br>[1.68]   | Ileus<br>[2.25]      |
| Southern Latin America | Neonatal<br>[0.67] | Congenital<br>[0.69] | LRI<br>[0.41]    | STI<br>[5.46]       | F Body<br>[0.96]   | SIDS<br>[0.66]      | Diarrhea<br>[0.84]  | Meningitis<br>[0.31] | Endocrine<br>[0.6]   | CMP<br>[0.82]        |
| Argentina              | Neonatal<br>[0.71] | Congenital<br>[0.66] | LRI<br>[0.41]    | STI<br>[6.26]       | F Body<br>[1.06]   | SIDS<br>[0.74]      | Diarrhea<br>[0.84]  | Meningitis<br>[0.33] | Endocrine<br>[0.6]   | CMP<br>[1.01]        |
| Chile                  | Neonatal<br>[0.55] | Congenital<br>[0.79] | LRI<br>[0.3]     | SIDS<br>[0.42]      | F Body<br>[0.44]   | Diarrhea<br>[0.66]  | Endocrine<br>[0.57] | Meningitis<br>[0.26] | STI<br>[0.91]        | Oth Neuro<br>[0.68]  |
| Uruguay                | Neonatal<br>[0.49] | Congenital<br>[0.65] | LRI<br>[0.36]    | F Body<br>[1.21]    | STI<br>[3.77]      | SIDS<br>[0.63]      | Diarrhea<br>[0.78]  | PEM<br>[2.77]        | Endocrine<br>[0.57]  | Enceph<br>[0.87]     |
| Western Europe         | Neonatal<br>[0.61] | Congenital<br>[0.48] | SIDS<br>[0.49]   | Endocrine<br>[0.76] | LRI<br>[0.4]       | Diarrhea<br>[1.17]  | F Body<br>[0.37]    | Oth Neuro<br>[0.8]   | Meningitis<br>[0.46] | Oth Un Inf<br>[0.75] |

**eFigure 7b. Leading ten causes of DALYs with the ratio of observed DALYs to DALYs expected on the basis of Socio-Demographic Index alone in 2017, <1 years, both sexes combined.** The top ten causes contributing to DALYs are listed globally, by socio-demographic quintile, and then by GBD superregion, region, country, and subnationally where modeled. For each cell, the ratio of observed DALYs to DALYs expected on the basis of socio-demographic index (SDI) alone are listed. Abbreviations: DALY=disability-adjusted life year, GBD=Global Burden of Disease.

Values shown in brackets represent the ratio of observed DALYs to predicted DALYs on the basis of Socio-Demographic Index (SDI), rounded to two (2) digits. Color ranges (shown below) were calculated to place a roughly equal number of cells into each bin.

| COLOR KEY:           |                    | [0.0-0.33]           | [0.33-0.46]         | [0.46-0.58]         | [0.58-0.7]          | [0.7-0.84]           | [0.84-1.03]          | [1.03-1.38]          | [1.38-2.46]          | 2.46+                |
|----------------------|--------------------|----------------------|---------------------|---------------------|---------------------|----------------------|----------------------|----------------------|----------------------|----------------------|
|                      | 1                  | 2                    | 3                   | 4                   | 5                   | 6                    | 7                    | 8                    | 9                    | 10                   |
| Andorra              | Neonatal<br>[0.48] | Congenital<br>[0.29] | SIDS<br>[0.47]      | LRI<br>[0.44]       | Diarrhea<br>[1.36]  | Endocrine<br>[0.44]  | Oth Un Inf<br>[1.0]  | URI<br>[1.2]         | F Body<br>[0.26]     | Hernia<br>[0.91]     |
| Austria              | Neonatal<br>[0.58] | Congenital<br>[0.5]  | SIDS<br>[0.45]      | Endocrine<br>[1.04] | Diarrhea<br>[1.36]  | LRI<br>[0.29]        | F Body<br>[0.36]     | Hernia<br>[1.99]     | Oth Neuro<br>[0.63]  | Meningitis<br>[0.42] |
| Belgium              | Neonatal<br>[0.66] | Congenital<br>[0.5]  | SIDS<br>[0.75]      | F Body<br>[0.94]    | Endocrine<br>[0.93] | LRI<br>[0.59]        | Diarrhea<br>[1.88]   | Oth Neuro<br>[0.93]  | Oth Un Inf<br>[1.44] | Meningitis<br>[0.74] |
| Cyprus               | Neonatal<br>[0.62] | Congenital<br>[0.28] | SIDS<br>[0.58]      | LRI<br>[0.37]       | Diarrhea<br>[1.15]  | Oth Neuro<br>[0.78]  | Hernia<br>[2.11]     | Endocrine<br>[0.34]  | F Body<br>[0.29]     | URI<br>[1.12]        |
| Denmark              | Neonatal<br>[0.98] | Congenital<br>[0.71] | SIDS<br>[0.35]      | Endocrine<br>[1.48] | Diarrhea<br>[3.43]  | LRI<br>[1.15]        | Oth Neuro<br>[1.45]  | F Body<br>[0.48]     | Meningitis<br>[1.16] | Oth Un Inf<br>[1.42] |
| Finland              | Neonatal<br>[0.43] | Congenital<br>[0.43] | SIDS<br>[0.46]      | Endocrine<br>[0.64] | Diarrhea<br>[1.36]  | Oth Neuro<br>[0.76]  | F Body<br>[0.36]     | URI<br>[1.15]        | LRI<br>[0.2]         | Ileus<br>[1.24]      |
| France               | Neonatal<br>[0.65] | Congenital<br>[0.45] | SIDS<br>[0.71]      | Endocrine<br>[0.97] | F Body<br>[0.53]    | Diarrhea<br>[1.29]   | LRI<br>[0.28]        | Oth Neuro<br>[0.84]  | Meningitis<br>[0.6]  | Oth Un Inf<br>[0.95] |
| Germany              | Neonatal<br>[0.72] | Congenital<br>[0.55] | SIDS<br>[0.65]      | Endocrine<br>[0.67] | Diarrhea<br>[1.56]  | Oth Neuro<br>[1.15]  | LRI<br>[0.32]        | F Body<br>[0.42]     | Hernia<br>[1.56]     | Violence<br>[0.77]   |
| Greece               | Neonatal<br>[0.48] | Congenital<br>[0.58] | LRI<br>[0.47]       | F Body<br>[0.54]    | SIDS<br>[0.19]      | Meningitis<br>[0.38] | Endocrine<br>[0.33]  | ALS<br>[3.24]        | Diarrhea<br>[0.47]   | URI<br>[1.12]        |
| Iceland              | Neonatal<br>[0.35] | Congenital<br>[0.36] | SIDS<br>[0.4]       | LRI<br>[0.8]        | Diarrhea<br>[1.83]  | Endocrine<br>[0.35]  | Oth Neuro<br>[0.66]  | Meningitis<br>[0.65] | URI<br>[1.17]        | F Body<br>[0.26]     |
| Ireland              | Neonatal<br>[0.57] | Congenital<br>[0.76] | SIDS<br>[0.84]      | Endocrine<br>[0.77] | LRI<br>[0.44]       | Diarrhea<br>[1.39]   | ALS<br>[2.16]        | Meningitis<br>[0.65] | URI<br>[1.14]        | Oth Un Inf<br>[0.78] |
| Israel               | Neonatal<br>[0.38] | Congenital<br>[0.41] | SIDS<br>[0.4]       | Endocrine<br>[0.8]  | LRI<br>[0.24]       | Diarrhea<br>[0.89]   | F Body<br>[0.29]     | Oth Neuro<br>[0.57]  | Oth Un Inf<br>[0.68] | Meningitis<br>[0.27] |
| Italy                | Neonatal<br>[0.53] | Congenital<br>[0.38] | Endocrine<br>[0.66] | LRI<br>[0.32]       | SIDS<br>[0.11]      | Diarrhea<br>[0.88]   | Oth Neuro<br>[0.61]  | F Body<br>[0.2]      | URI<br>[1.17]        | ALS<br>[1.56]        |
| Luxembourg           | Neonatal<br>[0.49] | Congenital<br>[0.26] | SIDS<br>[0.63]      | Diarrhea<br>[2.74]  | LRI<br>[0.68]       | F Body<br>[0.64]     | Endocrine<br>[0.57]  | Oth Un Inf<br>[1.58] | Hernia<br>[1.67]     | URI<br>[1.21]        |
| Malta                | Neonatal<br>[0.83] | Congenital<br>[0.94] | LRI<br>[0.74]       | F Body<br>[0.44]    | Endocrine<br>[0.56] | Oth Neuro<br>[1.05]  | SIDS<br>[0.1]        | Meningitis<br>[0.46] | Diarrhea<br>[0.58]   | Hernia<br>[1.97]     |
| Netherlands          | Neonatal<br>[0.99] | Congenital<br>[0.73] | SIDS<br>[0.24]      | Endocrine<br>[0.98] | LRI<br>[0.71]       | Oth Neuro<br>[1.28]  | F Body<br>[0.57]     | Meningitis<br>[1.26] | Diarrhea<br>[1.35]   | Oth Un Inf<br>[1.37] |
| Norway               | Neonatal<br>[0.52] | Congenital<br>[0.47] | Poison<br>[98.41]   | SIDS<br>[0.34]      | Road Inj<br>[3.24]  | Endocrine<br>[0.63]  | LRI<br>[0.44]        | F Body<br>[0.33]     | URI<br>[1.28]        | Diarrhea<br>[0.89]   |
| Portugal             | Neonatal<br>[0.32] | Congenital<br>[0.27] | LRI<br>[0.24]       | F Body<br>[0.37]    | Endocrine<br>[0.55] | Diarrhea<br>[0.6]    | SIDS<br>[0.09]       | Meningitis<br>[0.19] | ALS<br>[3.71]        | URI<br>[1.07]        |
| Spain                | Neonatal<br>[0.44] | Congenital<br>[0.33] | SIDS<br>[0.29]      | Endocrine<br>[0.68] | LRI<br>[0.24]       | Diarrhea<br>[0.74]   | Oth Neuro<br>[0.74]  | F Body<br>[0.24]     | Meningitis<br>[0.34] | URI<br>[1.12]        |
| Sweden               | Neonatal<br>[0.51] | Congenital<br>[0.47] | SIDS<br>[0.51]      | LRI<br>[0.45]       | Diarrhea<br>[1.41]  | Endocrine<br>[0.44]  | Oth Neuro<br>[0.58]  | URI<br>[1.21]        | Oth Un Inf<br>[0.77] | F Body<br>[0.19]     |
| Stockholm            | Neonatal<br>[0.5]  | Congenital<br>[0.55] | SIDS<br>[0.38]      | Endocrine<br>[0.83] | Oth Neuro<br>[1.27] | Diarrhea<br>[1.67]   | LRI<br>[0.5]         | Oth Un Inf<br>[1.24] | URI<br>[1.23]        | Meningitis<br>[0.64] |
| Sweden w/o Stockholm | Neonatal<br>[0.5]  | Congenital<br>[0.45] | SIDS<br>[0.54]      | LRI<br>[0.43]       | Diarrhea<br>[1.32]  | Endocrine<br>[0.33]  | URI<br>[1.2]         | CMP<br>[0.61]        | Oth Un Inf<br>[0.65] | Oth Neuro<br>[0.39]  |
| Switzerland          | Neonatal<br>[0.81] | Congenital<br>[0.71] | SIDS<br>[0.3]       | Diarrhea<br>[3.01]  | Endocrine<br>[0.71] | LRI<br>[0.49]        | Oth Neuro<br>[0.68]  | Oth Un Inf<br>[0.89] | URI<br>[1.18]        | F Body<br>[0.22]     |
| UK                   | Neonatal<br>[0.73] | Congenital<br>[0.53] | SIDS<br>[0.66]      | LRI<br>[0.61]       | Endocrine<br>[0.77] | Diarrhea<br>[1.06]   | Meningitis<br>[0.56] | Oth Neuro<br>[0.82]  | F Body<br>[0.32]     | Oth Un Inf<br>[1.01] |
| England              | Neonatal<br>[0.76] | Congenital<br>[0.54] | SIDS<br>[0.66]      | LRI<br>[0.67]       | Endocrine<br>[0.8]  | Diarrhea<br>[1.11]   | Oth Neuro<br>[0.85]  | Meningitis<br>[0.59] | F Body<br>[0.33]     | Oth Un Inf<br>[1.05] |
| E Midlands           | Neonatal<br>[0.73] | Congenital<br>[0.51] | SIDS<br>[0.58]      | LRI<br>[0.49]       | Endocrine<br>[0.79] | Diarrhea<br>[0.92]   | F Body<br>[0.31]     | Meningitis<br>[0.48] | Oth Neuro<br>[0.8]   | Oth Un Inf<br>[0.9]  |
| Derby                | Neonatal<br>[0.98] | Congenital<br>[0.68] | SIDS<br>[0.74]      | LRI<br>[0.85]       | Endocrine<br>[0.97] | Meningitis<br>[0.74] | F Body<br>[0.39]     | Diarrhea<br>[1.01]   | Oth Neuro<br>[0.84]  | Oth Un Inf<br>[1.15] |
| Derbyshire           | Neonatal<br>[0.53] | Congenital<br>[0.4]  | SIDS<br>[0.55]      | LRI<br>[0.35]       | Endocrine<br>[0.6]  | Diarrhea<br>[0.75]   | F Body<br>[0.28]     | Oth Neuro<br>[0.8]   | Meningitis<br>[0.38] | Oth Un Inf<br>[0.63] |
| Leicester            | Neonatal<br>[1.04] | Congenital<br>[0.72] | SIDS<br>[0.83]      | LRI<br>[0.82]       | Endocrine<br>[1.01] | Diarrhea<br>[1.21]   | Oth Neuro<br>[0.99]  | Meningitis<br>[0.64] | F Body<br>[0.38]     | Oth Un Inf<br>[1.16] |
| Leicestershire       | Neonatal<br>[0.77] | Congenital<br>[0.51] | SIDS<br>[0.47]      | LRI<br>[0.53]       | Endocrine<br>[0.79] | Diarrhea<br>[0.99]   | Oth Neuro<br>[0.71]  | Oth Un Inf<br>[0.93] | Meningitis<br>[0.41] | F Body<br>[0.22]     |
| Lincolnshire         | Neonatal<br>[0.53] | Congenital<br>[0.4]  | SIDS<br>[0.56]      | LRI<br>[0.29]       | Endocrine<br>[0.68] | Diarrhea<br>[0.64]   | Oth Neuro<br>[0.71]  | F Body<br>[0.22]     | Meningitis<br>[0.32] | Iron<br>[3.78]       |

**eFigure 7b. Leading ten causes of DALYs with the ratio of observed DALYs to DALYs expected on the basis of Socio-Demographic Index alone in 2017, <1 years, both sexes combined.** The top ten causes contributing to DALYs are listed globally, by socio-demographic quintile, and then by GBD superregion, region, country, and subnationally where modeled. For each cell, the ratio of observed DALYs to DALYs expected on the basis of socio-demographic index (SDI) alone are listed. Abbreviations: DALY=disability-adjusted life year, GBD=Global Burden of Disease.

Values shown in brackets represent the ratio of observed DALYs to predicted DALYs on the basis of Socio-Demographic Index (SDI), rounded to two (2) digits. Color ranges (shown below) were calculated to place a roughly equal number of cells into each bin.

| COLOR KEY:           |                    | [0.0-0.33]           | [0.33-0.46]    | [0.46-0.58]   | [0.58-0.7]          | [0.7-0.84]           | [0.84-1.03]          | [1.03-1.38]          | [1.38-2.46]          | 2.46+                |
|----------------------|--------------------|----------------------|----------------|---------------|---------------------|----------------------|----------------------|----------------------|----------------------|----------------------|
|                      | 1                  | 2                    | 3              | 4             | 5                   | 6                    | 7                    | 8                    | 9                    | 10                   |
| Northamptonshire     | Neonatal<br>[0.75] | Congenital<br>[0.51] | SIDS<br>[0.58] | LRI<br>[0.47] | Endocrine<br>[0.76] | Diarrhea<br>[1.04]   | F Body<br>[0.32]     | Meningitis<br>[0.46] | Oth Neuro<br>[0.7]   | Oth Un Inf<br>[0.92] |
| Nottingham           | Neonatal<br>[1.12] | Congenital<br>[0.73] | SIDS<br>[0.46] | LRI<br>[1.08] | Endocrine<br>[1.1]  | F Body<br>[0.6]      | Meningitis<br>[0.96] | Diarrhea<br>[1.41]   | Oth Un Inf<br>[1.66] | Oth Neuro<br>[1.04]  |
| Nottinghamshire      | Neonatal<br>[0.64] | Congenital<br>[0.47] | SIDS<br>[0.57] | LRI<br>[0.38] | Endocrine<br>[0.75] | F Body<br>[0.31]     | Diarrhea<br>[0.74]   | Oth Neuro<br>[0.84]  | Meningitis<br>[0.41] | Oth Un Inf<br>[0.78] |
| Rutland              | Neonatal<br>[0.29] | Congenital<br>[0.28] | SIDS<br>[0.52] | LRI<br>[0.25] | Endocrine<br>[0.48] | Diarrhea<br>[0.69]   | Meningitis<br>[0.34] | Oth Neuro<br>[0.49]  | URI<br>[1.13]        | F Body<br>[0.16]     |
| E England            | Neonatal<br>[0.62] | Congenital<br>[0.44] | SIDS<br>[0.57] | LRI<br>[0.45] | Endocrine<br>[0.7]  | Diarrhea<br>[0.89]   | Oth Neuro<br>[0.75]  | F Body<br>[0.28]     | Meningitis<br>[0.41] | Oth Un Inf<br>[0.87] |
| Bedford              | Neonatal<br>[0.79] | Congenital<br>[0.54] | SIDS<br>[0.7]  | LRI<br>[0.54] | Endocrine<br>[0.83] | F Body<br>[0.48]     | Oth Neuro<br>[1.21]  | Diarrhea<br>[1.08]   | Oth Un Inf<br>[1.13] | Meningitis<br>[0.45] |
| Cambridgeshire       | Neonatal<br>[0.74] | Congenital<br>[0.5]  | SIDS<br>[0.52] | LRI<br>[0.6]  | Endocrine<br>[0.77] | Diarrhea<br>[1.3]    | F Body<br>[0.38]     | Oth Neuro<br>[0.74]  | Oth Un Inf<br>[0.99] | Meningitis<br>[0.51] |
| Cen Bedfordshire     | Neonatal<br>[0.46] | Congenital<br>[0.35] | SIDS<br>[0.51] | LRI<br>[0.36] | Endocrine<br>[0.57] | Diarrhea<br>[0.91]   | F Body<br>[0.27]     | Oth Neuro<br>[0.69]  | Oth Un Inf<br>[0.93] | Meningitis<br>[0.34] |
| Essex                | Neonatal<br>[0.58] | Congenital<br>[0.41] | SIDS<br>[0.55] | LRI<br>[0.36] | Endocrine<br>[0.69] | Diarrhea<br>[0.71]   | Oth Neuro<br>[0.69]  | Meningitis<br>[0.37] | Oth Un Inf<br>[0.84] | F Body<br>[0.22]     |
| Hertfordshire        | Neonatal<br>[0.64] | Congenital<br>[0.43] | SIDS<br>[0.48] | LRI<br>[0.62] | Endocrine<br>[0.6]  | Diarrhea<br>[1.17]   | Oth Neuro<br>[0.65]  | F Body<br>[0.29]     | Oth Un Inf<br>[0.9]  | Meningitis<br>[0.45] |
| Luton                | Neonatal<br>[0.99] | Congenital<br>[0.73] | SIDS<br>[0.78] | LRI<br>[0.76] | Endocrine<br>[1.15] | F Body<br>[0.46]     | Oth Neuro<br>[1.15]  | Diarrhea<br>[1.1]    | Meningitis<br>[0.61] | Oth Un Inf<br>[1.19] |
| Norfolk              | Neonatal<br>[0.62] | Congenital<br>[0.47] | SIDS<br>[0.67] | LRI<br>[0.36] | Endocrine<br>[0.73] | Diarrhea<br>[0.79]   | Oth Neuro<br>[0.87]  | F Body<br>[0.26]     | Meningitis<br>[0.4]  | Oth Un Inf<br>[0.86] |
| Peterborough         | Neonatal<br>[0.61] | Congenital<br>[0.42] | SIDS<br>[0.64] | LRI<br>[0.39] | Endocrine<br>[0.78] | Diarrhea<br>[0.84]   | Oth Neuro<br>[0.85]  | F Body<br>[0.27]     | Oth Un Inf<br>[0.83] | Meningitis<br>[0.31] |
| Southend-on-Sea      | Neonatal<br>[0.47] | Congenital<br>[0.37] | SIDS<br>[0.57] | LRI<br>[0.31] | Endocrine<br>[0.61] | Diarrhea<br>[0.56]   | Meningitis<br>[0.33] | Oth Neuro<br>[0.57]  | Iron<br>[3.58]       | F Body<br>[0.17]     |
| Suffolk              | Neonatal<br>[0.5]  | Congenital<br>[0.39] | SIDS<br>[0.63] | LRI<br>[0.32] | Endocrine<br>[0.65] | Diarrhea<br>[0.7]    | Oth Neuro<br>[0.71]  | F Body<br>[0.24]     | Meningitis<br>[0.33] | Oth Un Inf<br>[0.74] |
| Thurrock             | Neonatal<br>[0.45] | Congenital<br>[0.34] | SIDS<br>[0.52] | LRI<br>[0.28] | Endocrine<br>[0.66] | Meningitis<br>[0.35] | Diarrhea<br>[0.51]   | Oth Neuro<br>[0.61]  | F Body<br>[0.19]     | Oth Un Inf<br>[0.58] |
| Greater London       | Neonatal<br>[0.9]  | Congenital<br>[0.57] | SIDS<br>[0.64] | LRI<br>[1.38] | Endocrine<br>[0.86] | Diarrhea<br>[1.71]   | Meningitis<br>[1.07] | Oth Un Inf<br>[1.52] | Oth Neuro<br>[0.87]  | F Body<br>[0.44]     |
| Barking & Dagenham   | Neonatal<br>[0.54] | Congenital<br>[0.41] | SIDS<br>[0.66] | LRI<br>[0.4]  | Endocrine<br>[0.61] | Diarrhea<br>[0.65]   | Meningitis<br>[0.35] | F Body<br>[0.24]     | Oth Neuro<br>[0.64]  | Oth Un Inf<br>[0.66] |
| Barnet               | Neonatal<br>[0.52] | Congenital<br>[0.38] | SIDS<br>[0.57] | LRI<br>[0.73] | Endocrine<br>[0.66] | Diarrhea<br>[1.03]   | Oth Neuro<br>[0.81]  | F Body<br>[0.3]      | Meningitis<br>[0.56] | Oth Un Inf<br>[0.93] |
| Bexley               | Neonatal<br>[0.46] | Congenital<br>[0.35] | SIDS<br>[0.57] | LRI<br>[0.38] | Endocrine<br>[0.68] | Oth Neuro<br>[0.86]  | Diarrhea<br>[0.74]   | Meningitis<br>[0.43] | F Body<br>[0.2]      | Oth Un Inf<br>[0.74] |
| Brent                | Neonatal<br>[0.73] | Congenital<br>[0.51] | SIDS<br>[0.71] | LRI<br>[0.79] | Endocrine<br>[0.76] | Oth Neuro<br>[1.05]  | Diarrhea<br>[1.07]   | F Body<br>[0.39]     | Meningitis<br>[0.68] | Oth Un Inf<br>[1.19] |
| Bromley              | Neonatal<br>[0.5]  | Congenital<br>[0.36] | SIDS<br>[0.38] | LRI<br>[0.44] | Endocrine<br>[0.57] | Diarrhea<br>[0.83]   | Oth Neuro<br>[0.66]  | Meningitis<br>[0.46] | Oth Un Inf<br>[0.84] | URI<br>[1.16]        |
| Camden               | Neonatal<br>[0.94] | Congenital<br>[0.51] | SIDS<br>[0.58] | LRI<br>[1.93] | Endocrine<br>[0.8]  | Diarrhea<br>[1.97]   | F Body<br>[0.59]     | Oth Un Inf<br>[1.88] | Meningitis<br>[1.48] | URI<br>[1.44]        |
| Croydon              | Neonatal<br>[0.62] | Congenital<br>[0.44] | SIDS<br>[0.52] | LRI<br>[0.49] | Endocrine<br>[0.63] | Diarrhea<br>[0.77]   | Meningitis<br>[0.49] | Oth Neuro<br>[0.76]  | F Body<br>[0.27]     | Oth Un Inf<br>[0.91] |
| Ealing               | Neonatal<br>[0.59] | Congenital<br>[0.39] | SIDS<br>[0.5]  | LRI<br>[0.81] | Endocrine<br>[0.63] | Diarrhea<br>[1.21]   | Oth Un Inf<br>[1.23] | Oth Neuro<br>[0.67]  | F Body<br>[0.28]     | Meningitis<br>[0.5]  |
| Enfield              | Neonatal<br>[0.66] | Congenital<br>[0.44] | SIDS<br>[0.67] | LRI<br>[0.59] | Endocrine<br>[0.66] | Diarrhea<br>[0.96]   | Meningitis<br>[0.57] | Oth Neuro<br>[0.81]  | F Body<br>[0.27]     | CMP<br>[0.83]        |
| Greenwich            | Neonatal<br>[0.78] | Congenital<br>[0.5]  | SIDS<br>[0.61] | LRI<br>[0.5]  | Endocrine<br>[0.62] | Meningitis<br>[0.57] | Diarrhea<br>[0.88]   | Oth Un Inf<br>[0.91] | Oth Neuro<br>[0.65]  | F Body<br>[0.22]     |
| Hackney              | Neonatal<br>[1.18] | Congenital<br>[0.69] | SIDS<br>[0.97] | LRI<br>[1.7]  | Endocrine<br>[1.31] | Diarrhea<br>[2.14]   | Meningitis<br>[1.47] | F Body<br>[0.68]     | Oth Un Inf<br>[2.21] | Oth Neuro<br>[1.08]  |
| Hammersmith & Fulham | Neonatal<br>[0.95] | Congenital<br>[0.55] | SIDS<br>[0.62] | LRI<br>[1.66] | Endocrine<br>[0.89] | Diarrhea<br>[2.17]   | Meningitis<br>[1.55] | Oth Un Inf<br>[1.88] | F Body<br>[0.53]     | Oth Neuro<br>[0.65]  |
| Haringey             | Neonatal<br>[0.75] | Congenital<br>[0.47] | SIDS<br>[0.71] | LRI<br>[0.81] | Endocrine<br>[0.83] | Meningitis<br>[0.82] | Diarrhea<br>[1.25]   | Oth Un Inf<br>[1.49] | F Body<br>[0.39]     | Oth Neuro<br>[0.82]  |
| Harrow               | Neonatal<br>[0.86] | Congenital<br>[0.55] | SIDS<br>[0.63] | LRI<br>[0.63] | Endocrine<br>[0.88] | Diarrhea<br>[1.08]   | Meningitis<br>[0.68] | Oth Neuro<br>[0.8]   | Oth Un Inf<br>[1.14] | CMP<br>[0.88]        |

**eFigure 7b. Leading ten causes of DALYs with the ratio of observed DALYs to DALYs expected on the basis of Socio-Demographic Index alone in 2017, <1 years, both sexes combined.** The top ten causes contributing to DALYs are listed globally, by socio-demographic quintile, and then by GBD superregion, region, country, and subnationally where modeled. For each cell, the ratio of observed DALYs to DALYs expected on the basis of socio-demographic index (SDI) alone are listed. Abbreviations: DALY=disability-adjusted life year, GBD=Global Burden of Disease.

Values shown in brackets represent the ratio of observed DALYs to predicted DALYs on the basis of Socio-Demographic Index (SDI), rounded to two (2) digits. Color ranges (shown below) were calculated to place a roughly equal number of cells into each bin.

| COLOR KEY:           |                    | [0.0-0.33]           | [0.33-0.46]    | [0.46-0.58]   | [0.58-0.7]          | [0.7-0.84]           | [0.84-1.03]          | [1.03-1.38]          | [1.38-2.46]          | 2.46+                |
|----------------------|--------------------|----------------------|----------------|---------------|---------------------|----------------------|----------------------|----------------------|----------------------|----------------------|
|                      | 1                  | 2                    | 3              | 4             | 5                   | 6                    | 7                    | 8                    | 9                    | 10                   |
| Havering             | Neonatal<br>[0.42] | Congenital<br>[0.32] | SIDS<br>[0.4]  | LRI<br>[0.35] | Endocrine<br>[0.51] | Diarrhea<br>[0.63]   | Meningitis<br>[0.33] | F Body<br>[0.2]      | Oth Neuro<br>[0.53]  | URI<br>[1.2]         |
| Hillingdon           | Neonatal<br>[0.67] | Congenital<br>[0.49] | SIDS<br>[0.52] | LRI<br>[0.99] | Endocrine<br>[0.75] | Diarrhea<br>[1.67]   | Oth Neuro<br>[0.84]  | Meningitis<br>[0.67] | F Body<br>[0.3]      | Oth Un Inf<br>[1.01] |
| Hounslow             | Neonatal<br>[0.85] | Congenital<br>[0.55] | SIDS<br>[0.6]  | LRI<br>[1.04] | Endocrine<br>[0.83] | Diarrhea<br>[1.68]   | Oth Un Inf<br>[1.44] | Meningitis<br>[0.8]  | Oth Neuro<br>[0.76]  | F Body<br>[0.32]     |
| Islington            | Neonatal<br>[0.86] | Congenital<br>[0.51] | SIDS<br>[0.69] | LRI<br>[1.89] | Endocrine<br>[0.77] | Diarrhea<br>[2.1]    | F Body<br>[0.68]     | Oth Un Inf<br>[1.73] | Meningitis<br>[1.19] | Oth Neuro<br>[0.68]  |
| Kensington & Chelsea | Neonatal<br>[0.73] | Congenital<br>[0.42] | SIDS<br>[0.57] | LRI<br>[1.58] | Endocrine<br>[0.75] | Diarrhea<br>[2.09]   | F Body<br>[0.64]     | Oth Un Inf<br>[1.84] | Oth Neuro<br>[0.87]  | Meningitis<br>[1.2]  |
| Kingston upon Thames | Neonatal<br>[0.78] | Congenital<br>[0.53] | SIDS<br>[0.73] | LRI<br>[1.27] | Endocrine<br>[0.87] | Diarrhea<br>[1.7]    | Oth Neuro<br>[0.95]  | Meningitis<br>[0.93] | F Body<br>[0.38]     | Oth Un Inf<br>[1.13] |
| Lambeth              | Neonatal<br>[1.2]  | Congenital<br>[0.71] | SIDS<br>[0.93] | LRI<br>[1.96] | Endocrine<br>[1.04] | Oth Un Inf<br>[2.81] | Meningitis<br>[1.5]  | F Body<br>[0.66]     | Diarrhea<br>[1.79]   | Oth Neuro<br>[1.03]  |
| Lewisham             | Neonatal<br>[0.81] | Congenital<br>[0.47] | SIDS<br>[0.65] | LRI<br>[0.8]  | Endocrine<br>[0.71] | Diarrhea<br>[0.93]   | Oth Neuro<br>[0.73]  | Oth Un Inf<br>[1.05] | Meningitis<br>[0.45] | F Body<br>[0.25]     |
| Merton               | Neonatal<br>[0.7]  | Congenital<br>[0.48] | SIDS<br>[0.61] | LRI<br>[0.81] | Endocrine<br>[0.77] | Diarrhea<br>[1.27]   | Oth Neuro<br>[0.81]  | Oth Un Inf<br>[1.19] | Meningitis<br>[0.65] | F Body<br>[0.31]     |
| Newham               | Neonatal<br>[0.66] | Congenital<br>[0.48] | SIDS<br>[0.6]  | LRI<br>[0.8]  | Endocrine<br>[0.91] | Diarrhea<br>[1.3]    | Meningitis<br>[0.79] | Oth Un Inf<br>[1.58] | F Body<br>[0.37]     | Oth Neuro<br>[0.92]  |
| Redbridge            | Neonatal<br>[0.45] | Congenital<br>[0.34] | SIDS<br>[0.46] | LRI<br>[0.46] | Endocrine<br>[0.59] | Diarrhea<br>[0.8]    | Meningitis<br>[0.43] | Oth Neuro<br>[0.68]  | F Body<br>[0.24]     | Oth Un Inf<br>[0.65] |
| Richmond upon Thames | Neonatal<br>[0.58] | Congenital<br>[0.41] | SIDS<br>[0.33] | LRI<br>[0.82] | Endocrine<br>[0.55] | Diarrhea<br>[1.39]   | Oth Un Inf<br>[1.05] | URI<br>[1.29]        | Meningitis<br>[0.65] | Oth Neuro<br>[0.56]  |
| Southwark            | Neonatal<br>[1.22] | Congenital<br>[0.65] | SIDS<br>[0.67] | LRI<br>[1.76] | Endocrine<br>[0.92] | Oth Un Inf<br>[2.09] | Diarrhea<br>[1.79]   | Meningitis<br>[1.25] | F Body<br>[0.46]     | Oth Neuro<br>[0.73]  |
| Sutton               | Neonatal<br>[0.52] | Congenital<br>[0.46] | SIDS<br>[0.57] | LRI<br>[0.59] | Endocrine<br>[0.68] | Diarrhea<br>[1.01]   | Oth Neuro<br>[0.85]  | F Body<br>[0.31]     | Meningitis<br>[0.52] | Oth Un Inf<br>[1.08] |
| Tower Hamlets        | Neonatal<br>[1.23] | Congenital<br>[0.78] | SIDS<br>[0.69] | LRI<br>[2.06] | Endocrine<br>[1.14] | Meningitis<br>[1.73] | Diarrhea<br>[2.24]   | F Body<br>[0.64]     | Oth Un Inf<br>[1.87] | Oth Neuro<br>[0.92]  |
| Waltham Forest       | Neonatal<br>[0.52] | Congenital<br>[0.38] | SIDS<br>[0.57] | LRI<br>[0.52] | Endocrine<br>[0.66] | Diarrhea<br>[0.86]   | F Body<br>[0.29]     | Oth Neuro<br>[0.82]  | Meningitis<br>[0.42] | Oth Un Inf<br>[0.76] |
| Wandsworth           | Neonatal<br>[0.89] | Congenital<br>[0.52] | SIDS<br>[0.5]  | LRI<br>[1.44] | Endocrine<br>[0.74] | Diarrhea<br>[1.73]   | Oth Neuro<br>[0.96]  | Oth Un Inf<br>[1.71] | Meningitis<br>[1.15] | F Body<br>[0.37]     |
| Westminster          | Neonatal<br>[0.93] | Congenital<br>[0.49] | SIDS<br>[0.55] | LRI<br>[1.58] | Endocrine<br>[0.83] | Diarrhea<br>[2.21]   | Oth Un Inf<br>[2.08] | Meningitis<br>[1.45] | F Body<br>[0.57]     | Oth Neuro<br>[0.69]  |
| NE England           | Neonatal<br>[0.56] | Congenital<br>[0.42] | SIDS<br>[0.72] | LRI<br>[0.42] | Endocrine<br>[0.65] | Diarrhea<br>[0.83]   | Oth Neuro<br>[0.82]  | F Body<br>[0.26]     | Meningitis<br>[0.39] | Oth Un Inf<br>[0.74] |
| County Durham        | Neonatal<br>[0.59] | Congenital<br>[0.45] | SIDS<br>[0.81] | LRI<br>[0.37] | Endocrine<br>[0.68] | Diarrhea<br>[0.73]   | Oth Neuro<br>[0.93]  | Meningitis<br>[0.38] | F Body<br>[0.24]     | Oth Un Inf<br>[0.68] |
| Darlington           | Neonatal<br>[0.6]  | Congenital<br>[0.41] | SIDS<br>[0.67] | LRI<br>[0.34] | Endocrine<br>[0.63] | Oth Neuro<br>[0.78]  | Diarrhea<br>[0.69]   | Meningitis<br>[0.43] | Oth Un Inf<br>[0.74] | URI<br>[1.19]        |
| Gateshead            | Neonatal<br>[0.68] | Congenital<br>[0.48] | SIDS<br>[0.92] | LRI<br>[0.55] | Endocrine<br>[0.74] | Diarrhea<br>[0.89]   | Oth Neuro<br>[0.94]  | F Body<br>[0.33]     | Meningitis<br>[0.41] | Oth Un Inf<br>[0.86] |
| Hartlepool           | Neonatal<br>[0.53] | Congenital<br>[0.35] | SIDS<br>[0.66] | LRI<br>[0.29] | Endocrine<br>[0.55] | F Body<br>[0.3]      | Diarrhea<br>[0.61]   | Meningitis<br>[0.28] | Oth Neuro<br>[0.61]  | Oth Un Inf<br>[0.56] |
| Middlesbrough        | Neonatal<br>[0.59] | Congenital<br>[0.46] | SIDS<br>[0.85] | LRI<br>[0.54] | Endocrine<br>[0.67] | Diarrhea<br>[0.82]   | Oth Neuro<br>[0.98]  | Meningitis<br>[0.41] | Oth Un Inf<br>[1.0]  | F Body<br>[0.24]     |
| Newcastle upon Tyne  | Neonatal<br>[0.7]  | Congenital<br>[0.51] | SIDS<br>[0.8]  | LRI<br>[0.91] | Endocrine<br>[0.88] | Diarrhea<br>[1.56]   | F Body<br>[0.48]     | Oth Neuro<br>[0.98]  | Meningitis<br>[0.82] | Oth Un Inf<br>[1.1]  |
| N Tyneside           | Neonatal<br>[0.44] | Congenital<br>[0.34] | SIDS<br>[0.59] | LRI<br>[0.33] | Diarrhea<br>[0.97]  | Endocrine<br>[0.53]  | F Body<br>[0.22]     | Oth Neuro<br>[0.61]  | Meningitis<br>[0.31] | Oth Un Inf<br>[0.67] |
| Northumberland       | Neonatal<br>[0.46] | Congenital<br>[0.41] | SIDS<br>[0.5]  | LRI<br>[0.28] | Endocrine<br>[0.6]  | Diarrhea<br>[0.63]   | F Body<br>[0.26]     | Oth Neuro<br>[0.68]  | Meningitis<br>[0.31] | Iron<br>[3.95]       |
| Redcar & Cleveland   | Neonatal<br>[0.42] | Congenital<br>[0.31] | SIDS<br>[0.64] | LRI<br>[0.24] | Endocrine<br>[0.44] | Diarrhea<br>[0.49]   | Oth Neuro<br>[0.61]  | Meningitis<br>[0.23] | Oth Un Inf<br>[0.58] | F Body<br>[0.14]     |
| S Tyneside           | Neonatal<br>[0.36] | Congenital<br>[0.31] | SIDS<br>[0.53] | LRI<br>[0.22] | Endocrine<br>[0.5]  | Diarrhea<br>[0.58]   | F Body<br>[0.2]      | Oth Neuro<br>[0.61]  | Meningitis<br>[0.21] | Oth Un Inf<br>[0.51] |
| Stockton-on-Tees     | Neonatal<br>[0.62] | Congenital<br>[0.43] | SIDS<br>[0.7]  | LRI<br>[0.44] | Endocrine<br>[0.64] | Diarrhea<br>[0.81]   | Oth Neuro<br>[0.81]  | Meningitis<br>[0.35] | URI<br>[1.23]        | F Body<br>[0.16]     |
| Sunderland           | Neonatal<br>[0.53] | Congenital<br>[0.39] | SIDS<br>[0.77] | LRI<br>[0.44] | Endocrine<br>[0.67] | Diarrhea<br>[0.93]   | F Body<br>[0.32]     | Meningitis<br>[0.48] | Oth Neuro<br>[0.92]  | Oth Un Inf<br>[0.78] |

**eFigure 7b. Leading ten causes of DALYs with the ratio of observed DALYs to DALYs expected on the basis of Socio-Demographic Index alone in 2017, <1 years, both sexes combined.** The top ten causes contributing to DALYs are listed globally, by socio-demographic quintile, and then by GBD superregion, region, country, and subnationally where modeled. For each cell, the ratio of observed DALYs to DALYs expected on the basis of socio-demographic index (SDI) alone are listed. Abbreviations: DALY=disability-adjusted life year, GBD=Global Burden of Disease.

Values shown in brackets represent the ratio of observed DALYs to predicted DALYs on the basis of Socio-Demographic Index (SDI), rounded to two (2) digits. Color ranges (shown below) were calculated to place a roughly equal number of cells into each bin.

| COLOR KEY:            |                    | [0.0-0.33]           | (0.33-0.46]    | (0.46-0.58]   | (0.58-0.7]          | (0.7-0.84]           | (0.84-1.03]          | (1.03-1.38]          | (1.38-2.46]          | 2.46+                |
|-----------------------|--------------------|----------------------|----------------|---------------|---------------------|----------------------|----------------------|----------------------|----------------------|----------------------|
|                       | 1                  | 2                    | 3              | 4             | 5                   | 6                    | 7                    | 8                    | 9                    | 10                   |
| NW England            | Neonatal<br>[0.8]  | Congenital<br>[0.59] | SIDS<br>[0.77] | LRI<br>[0.68] | Endocrine<br>[0.85] | Diarrhea<br>[1.06]   | Meningitis<br>[0.61] | F Body<br>[0.37]     | Oth Neuro<br>[0.97]  | Oth Un Inf<br>[1.03] |
| Blackburn with Darwen | Neonatal<br>[0.69] | Congenital<br>[0.5]  | SIDS<br>[0.91] | LRI<br>[0.41] | Endocrine<br>[0.84] | Diarrhea<br>[0.73]   | Oth Neuro<br>[1.06]  | Meningitis<br>[0.4]  | Oth Un Inf<br>[0.83] | CMP<br>[0.76]        |
| Blackpool             | Neonatal<br>[0.61] | Congenital<br>[0.47] | SIDS<br>[1.1]  | LRI<br>[0.38] | Endocrine<br>[0.77] | F Body<br>[0.34]     | Meningitis<br>[0.37] | Diarrhea<br>[0.5]    | Oth Neuro<br>[0.91]  | CMP<br>[0.67]        |
| Bolton                | Neonatal<br>[0.6]  | Congenital<br>[0.46] | SIDS<br>[0.82] | LRI<br>[0.46] | Endocrine<br>[0.8]  | Meningitis<br>[0.5]  | Oth Neuro<br>[0.93]  | Diarrhea<br>[0.62]   | F Body<br>[0.24]     | Oth Un Inf<br>[0.73] |
| Bury                  | Neonatal<br>[0.67] | Congenital<br>[0.52] | SIDS<br>[0.65] | LRI<br>[0.47] | Endocrine<br>[0.77] | F Body<br>[0.36]     | Diarrhea<br>[0.82]   | Oth Neuro<br>[0.89]  | Meningitis<br>[0.37] | Oth Un Inf<br>[0.89] |
| Cheshire E            | Neonatal<br>[0.8]  | Congenital<br>[0.55] | SIDS<br>[0.53] | LRI<br>[0.78] | Endocrine<br>[0.76] | Diarrhea<br>[1.36]   | Oth Neuro<br>[0.89]  | F Body<br>[0.39]     | Meningitis<br>[0.64] | Oth Un Inf<br>[1.02] |
| Cheshire W & Chester  | Neonatal<br>[0.78] | Congenital<br>[0.57] | SIDS<br>[0.62] | LRI<br>[0.76] | Endocrine<br>[0.84] | Diarrhea<br>[1.35]   | F Body<br>[0.46]     | Meningitis<br>[0.7]  | Oth Neuro<br>[0.83]  | Oth Un Inf<br>[1.02] |
| Cumbria               | Neonatal<br>[0.64] | Congenital<br>[0.49] | SIDS<br>[0.71] | LRI<br>[0.41] | Endocrine<br>[0.66] | Diarrhea<br>[0.95]   | Oth Neuro<br>[0.98]  | F Body<br>[0.32]     | Meningitis<br>[0.46] | Oth Un Inf<br>[0.94] |
| Halton                | Neonatal<br>[0.63] | Congenital<br>[0.43] | SIDS<br>[0.68] | LRI<br>[0.48] | Endocrine<br>[0.68] | Diarrhea<br>[0.97]   | Meningitis<br>[0.57] | Oth Neuro<br>[0.82]  | F Body<br>[0.29]     | Oth Un Inf<br>[0.77] |
| Knowsley              | Neonatal<br>[0.51] | Congenital<br>[0.41] | SIDS<br>[0.71] | LRI<br>[0.46] | Endocrine<br>[0.65] | Diarrhea<br>[0.82]   | F Body<br>[0.26]     | Meningitis<br>[0.39] | Oth Neuro<br>[0.73]  | Oth Un Inf<br>[0.66] |
| Lancashire            | Neonatal<br>[0.8]  | Congenital<br>[0.61] | SIDS<br>[0.67] | LRI<br>[0.68] | Endocrine<br>[0.83] | F Body<br>[0.41]     | Meningitis<br>[0.65] | Diarrhea<br>[1.01]   | Oth Neuro<br>[1.01]  | Oth Un Inf<br>[0.98] |
| Liverpool             | Neonatal<br>[1.09] | Congenital<br>[0.75] | SIDS<br>[0.93] | LRI<br>[1.2]  | Endocrine<br>[1.05] | Diarrhea<br>[1.51]   | Meningitis<br>[0.86] | Oth Neuro<br>[1.16]  | F Body<br>[0.45]     | Oth Un Inf<br>[1.37] |
| Manchester            | Neonatal<br>[1.4]  | Congenital<br>[0.91] | SIDS<br>[0.96] | LRI<br>[1.77] | Endocrine<br>[1.26] | Diarrhea<br>[2.03]   | Meningitis<br>[1.27] | Oth Un Inf<br>[1.99] | F Body<br>[0.58]     | Oth Neuro<br>[1.16]  |
| Oldham                | Neonatal<br>[0.79] | Congenital<br>[0.6]  | SIDS<br>[0.85] | LRI<br>[0.35] | Endocrine<br>[0.9]  | Meningitis<br>[0.49] | Oth Neuro<br>[1.19]  | F Body<br>[0.29]     | Diarrhea<br>[0.62]   | Oth Un Inf<br>[0.79] |
| Rochdale              | Neonatal<br>[0.59] | Congenital<br>[0.47] | SIDS<br>[0.91] | LRI<br>[0.43] | Endocrine<br>[0.79] | Oth Neuro<br>[1.25]  | Meningitis<br>[0.45] | Diarrhea<br>[0.64]   | F Body<br>[0.29]     | Oth Un Inf<br>[0.83] |
| Salford               | Neonatal<br>[0.82] | Congenital<br>[0.66] | SIDS<br>[0.89] | LRI<br>[0.89] | Endocrine<br>[1.06] | Oth Neuro<br>[1.25]  | F Body<br>[0.46]     | Diarrhea<br>[1.19]   | Meningitis<br>[0.72] | Oth Un Inf<br>[1.48] |
| Sefton                | Neonatal<br>[0.67] | Congenital<br>[0.5]  | SIDS<br>[0.82] | LRI<br>[0.4]  | Endocrine<br>[0.73] | Diarrhea<br>[0.68]   | Meningitis<br>[0.4]  | F Body<br>[0.27]     | Oth Neuro<br>[0.81]  | Oth Un Inf<br>[0.91] |
| St Helens             | Neonatal<br>[0.51] | Congenital<br>[0.4]  | SIDS<br>[0.58] | LRI<br>[0.41] | Endocrine<br>[0.65] | Diarrhea<br>[0.73]   | F Body<br>[0.27]     | Oth Neuro<br>[0.72]  | Meningitis<br>[0.28] | Oth Un Inf<br>[0.74] |
| Stockport             | Neonatal<br>[0.9]  | Congenital<br>[0.67] | SIDS<br>[0.79] | LRI<br>[0.74] | Endocrine<br>[0.97] | Diarrhea<br>[1.23]   | Oth Neuro<br>[1.07]  | F Body<br>[0.41]     | Meningitis<br>[0.63] | Oth Un Inf<br>[1.02] |
| Tameside              | Neonatal<br>[0.5]  | Congenital<br>[0.42] | SIDS<br>[0.72] | LRI<br>[0.34] | Endocrine<br>[0.62] | Diarrhea<br>[0.74]   | Meningitis<br>[0.43] | F Body<br>[0.25]     | Oth Neuro<br>[0.75]  | Oth Un Inf<br>[0.61] |
| Trafford              | Neonatal<br>[0.8]  | Congenital<br>[0.5]  | SIDS<br>[0.53] | LRI<br>[0.74] | Endocrine<br>[0.8]  | Diarrhea<br>[1.34]   | Oth Neuro<br>[0.83]  | F Body<br>[0.36]     | Meningitis<br>[0.69] | Oth Un Inf<br>[1.15] |
| Warrington            | Neonatal<br>[0.92] | Congenital<br>[0.61] | SIDS<br>[0.74] | LRI<br>[1.01] | Endocrine<br>[0.7]  | Diarrhea<br>[1.29]   | Meningitis<br>[0.69] | F Body<br>[0.35]     | Oth Neuro<br>[0.76]  | Oth Un Inf<br>[1.09] |
| Wigan                 | Neonatal<br>[0.54] | Congenital<br>[0.42] | SIDS<br>[0.74] | LRI<br>[0.37] | Endocrine<br>[0.62] | Diarrhea<br>[0.62]   | F Body<br>[0.24]     | Meningitis<br>[0.32] | Oth Neuro<br>[0.56]  | Oth Un Inf<br>[0.66] |
| Wirral                | Neonatal<br>[0.67] | Congenital<br>[0.55] | SIDS<br>[0.91] | LRI<br>[0.48] | Endocrine<br>[0.9]  | F Body<br>[0.34]     | Diarrhea<br>[0.75]   | Oth Neuro<br>[0.96]  | Meningitis<br>[0.43] | Oth Un Inf<br>[0.84] |
| SE England            | Neonatal<br>[0.65] | Congenital<br>[0.46] | SIDS<br>[0.59] | LRI<br>[0.54] | Endocrine<br>[0.67] | Diarrhea<br>[0.99]   | Oth Neuro<br>[0.67]  | Meningitis<br>[0.49] | F Body<br>[0.25]     | Oth Un Inf<br>[0.9]  |
| Bracknell Forest      | Neonatal<br>[0.42] | Congenital<br>[0.34] | SIDS<br>[0.43] | LRI<br>[0.53] | Endocrine<br>[0.51] | Diarrhea<br>[0.96]   | F Body<br>[0.31]     | Oth Neuro<br>[0.53]  | URI<br>[1.22]        | Oth Un Inf<br>[0.71] |
| Brighton & Hove       | Neonatal<br>[1.05] | Congenital<br>[0.7]  | SIDS<br>[0.8]  | LRI<br>[1.13] | Endocrine<br>[0.99] | Meningitis<br>[1.16] | F Body<br>[0.55]     | Oth Un Inf<br>[1.73] | Diarrhea<br>[1.42]   | Oth Neuro<br>[0.81]  |
| Buckinghamshire       | Neonatal<br>[0.85] | Congenital<br>[0.6]  | SIDS<br>[0.53] | LRI<br>[0.73] | Endocrine<br>[0.83] | Diarrhea<br>[1.24]   | Meningitis<br>[0.71] | F Body<br>[0.37]     | Oth Neuro<br>[0.76]  | Oth Un Inf<br>[1.19] |
| E Sussex              | Neonatal<br>[0.5]  | Congenital<br>[0.43] | SIDS<br>[0.65] | LRI<br>[0.29] | Endocrine<br>[0.53] | Diarrhea<br>[0.59]   | Oth Neuro<br>[0.6]   | Meningitis<br>[0.28] | Oth Un Inf<br>[0.7]  | CMP<br>[0.64]        |
| Hampshire             | Neonatal<br>[0.61] | Congenital<br>[0.42] | SIDS<br>[0.53] | LRI<br>[0.4]  | Endocrine<br>[0.63] | Diarrhea<br>[0.92]   | Oth Neuro<br>[0.61]  | Oth Un Inf<br>[0.8]  | F Body<br>[0.22]     | Meningitis<br>[0.36] |
| Isle of Wight         | Neonatal<br>[0.28] | Congenital<br>[0.26] | SIDS<br>[0.5]  | LRI<br>[0.2]  | Endocrine<br>[0.44] | Diarrhea<br>[0.55]   | Oth Neuro<br>[0.52]  | F Body<br>[0.16]     | URI<br>[1.15]        | Meningitis<br>[0.2]  |

**eFigure 7b. Leading ten causes of DALYs with the ratio of observed DALYs to DALYs expected on the basis of Socio-Demographic Index alone in 2017, <1 years, both sexes combined.** The top ten causes contributing to DALYs are listed globally, by socio-demographic quintile, and then by GBD superregion, region, country, and subnationally where modeled. For each cell, the ratio of observed DALYs to DALYs expected on the basis of socio-demographic index (SDI) alone are listed. Abbreviations: DALY=disability-adjusted life year, GBD=Global Burden of Disease.

Values shown in brackets represent the ratio of observed DALYs to predicted DALYs on the basis of Socio-Demographic Index (SDI), rounded to two (2) digits. Color ranges (shown below) were calculated to place a roughly equal number of cells into each bin.

| COLOR KEY:           |                    | [0.0-0.33]           | [0.33-0.46]    | [0.46-0.58]   | [0.58-0.7]          | [0.7-0.84]           | [0.84-1.03]          | [1.03-1.38]          | [1.38-2.46]          | 2.46+                |
|----------------------|--------------------|----------------------|----------------|---------------|---------------------|----------------------|----------------------|----------------------|----------------------|----------------------|
|                      | 1                  | 2                    | 3              | 4             | 5                   | 6                    | 7                    | 8                    | 9                    | 10                   |
| Kent                 | Neonatal<br>[0.55] | Congenital<br>[0.4]  | SIDS<br>[0.69] | LRI<br>[0.38] | Endocrine<br>[0.63] | Diarrhea<br>[0.73]   | Meningitis<br>[0.4]  | Oth Neuro<br>[0.66]  | F Body<br>[0.21]     | Oth Un Inf<br>[0.75] |
| Medway               | Neonatal<br>[0.55] | Congenital<br>[0.42] | SIDS<br>[0.53] | LRI<br>[0.28] | Endocrine<br>[0.55] | Oth Neuro<br>[0.73]  | Diarrhea<br>[0.55]   | Meningitis<br>[0.35] | URI<br>[1.21]        | F Body<br>[0.15]     |
| Milton Keynes        | Neonatal<br>[0.94] | Congenital<br>[0.58] | SIDS<br>[0.75] | LRI<br>[0.86] | Endocrine<br>[0.77] | Diarrhea<br>[1.25]   | Meningitis<br>[0.6]  | Oth Un Inf<br>[1.02] | F Body<br>[0.28]     | Oth Neuro<br>[0.6]   |
| Oxfordshire          | Neonatal<br>[0.73] | Congenital<br>[0.51] | SIDS<br>[0.55] | LRI<br>[0.73] | Endocrine<br>[0.78] | Diarrhea<br>[1.34]   | Oth Neuro<br>[0.78]  | Meningitis<br>[0.7]  | Oth Un Inf<br>[1.18] | F Body<br>[0.28]     |
| Portsmouth           | Neonatal<br>[0.56] | Congenital<br>[0.37] | SIDS<br>[0.71] | LRI<br>[0.53] | Endocrine<br>[0.69] | Diarrhea<br>[0.97]   | Meningitis<br>[0.49] | Oth Neuro<br>[0.6]   | F Body<br>[0.22]     | URI<br>[1.18]        |
| Reading              | Neonatal<br>[0.99] | Congenital<br>[0.62] | SIDS<br>[0.53] | LRI<br>[1.27] | Endocrine<br>[0.93] | Diarrhea<br>[1.56]   | Oth Un Inf<br>[1.41] | Meningitis<br>[0.78] | Oth Neuro<br>[0.68]  | F Body<br>[0.31]     |
| Slough               | Neonatal<br>[0.89] | Congenital<br>[0.64] | SIDS<br>[0.56] | LRI<br>[1.04] | Endocrine<br>[0.87] | Diarrhea<br>[1.28]   | Meningitis<br>[0.79] | F Body<br>[0.42]     | Oth Un Inf<br>[1.12] | Oth Neuro<br>[0.65]  |
| Southampton          | Neonatal<br>[0.76] | Congenital<br>[0.54] | SIDS<br>[0.81] | LRI<br>[0.64] | Endocrine<br>[0.8]  | Diarrhea<br>[1.19]   | F Body<br>[0.37]     | Oth Neuro<br>[0.74]  | Meningitis<br>[0.5]  | Oth Un Inf<br>[0.91] |
| Surrey               | Neonatal<br>[0.66] | Congenital<br>[0.47] | SIDS<br>[0.47] | LRI<br>[0.74] | Endocrine<br>[0.61] | Diarrhea<br>[1.26]   | Oth Neuro<br>[0.64]  | Meningitis<br>[0.54] | URI<br>[1.25]        | Oth Un Inf<br>[0.9]  |
| West Berkshire       | Neonatal<br>[0.64] | Congenital<br>[0.48] | SIDS<br>[0.52] | LRI<br>[0.64] | Endocrine<br>[0.66] | Diarrhea<br>[1.16]   | Meningitis<br>[0.63] | Oth Un Inf<br>[1.02] | F Body<br>[0.28]     | Oth Neuro<br>[0.62]  |
| W Sussex             | Neonatal<br>[0.56] | Congenital<br>[0.42] | SIDS<br>[0.6]  | LRI<br>[0.43] | Endocrine<br>[0.61] | Diarrhea<br>[0.89]   | Oth Neuro<br>[0.8]   | Meningitis<br>[0.47] | Oth Un Inf<br>[0.87] | F Body<br>[0.23]     |
| Windsor & Maidenhead | Neonatal<br>[0.8]  | Congenital<br>[0.58] | SIDS<br>[0.55] | LRI<br>[1.14] | Endocrine<br>[0.72] | Diarrhea<br>[1.58]   | Oth Neuro<br>[0.81]  | F Body<br>[0.36]     | Oth Un Inf<br>[1.17] | URI<br>[1.29]        |
| Wokingham            | Neonatal<br>[0.71] | Congenital<br>[0.54] | SIDS<br>[0.49] | LRI<br>[0.84] | Endocrine<br>[0.67] | Diarrhea<br>[1.29]   | Oth Un Inf<br>[1.3]  | Oth Neuro<br>[0.75]  | F Body<br>[0.31]     | Meningitis<br>[0.56] |
| SW England           | Neonatal<br>[0.59] | Congenital<br>[0.45] | SIDS<br>[0.66] | LRI<br>[0.43] | Endocrine<br>[0.65] | Diarrhea<br>[0.91]   | Oth Neuro<br>[0.75]  | Meningitis<br>[0.42] | F Body<br>[0.25]     | Oth Un Inf<br>[0.87] |
| Bath & NE Somerset   | Neonatal<br>[0.51] | Congenital<br>[0.41] | SIDS<br>[0.62] | LRI<br>[0.62] | Endocrine<br>[0.68] | Diarrhea<br>[1.62]   | Oth Neuro<br>[0.95]  | Meningitis<br>[0.61] | Oth Un Inf<br>[0.98] | F Body<br>[0.26]     |
| Bournemouth          | Neonatal<br>[0.57] | Congenital<br>[0.45] | SIDS<br>[0.46] | LRI<br>[0.56] | Endocrine<br>[0.72] | F Body<br>[0.37]     | Oth Neuro<br>[0.83]  | Diarrhea<br>[0.96]   | Oth Un Inf<br>[0.99] | Meningitis<br>[0.4]  |
| Bristol              | Neonatal<br>[0.79] | Congenital<br>[0.57] | SIDS<br>[0.85] | LRI<br>[0.99] | Endocrine<br>[0.82] | Diarrhea<br>[1.78]   | F Body<br>[0.43]     | Meningitis<br>[0.87] | Oth Neuro<br>[0.86]  | Oth Un Inf<br>[1.2]  |
| Cornwall             | Neonatal<br>[0.64] | Congenital<br>[0.47] | SIDS<br>[0.73] | LRI<br>[0.29] | Endocrine<br>[0.65] | Diarrhea<br>[0.57]   | Oth Neuro<br>[0.7]   | Meningitis<br>[0.33] | Oth Un Inf<br>[0.81] | F Body<br>[0.2]      |
| Devon                | Neonatal<br>[0.66] | Congenital<br>[0.48] | SIDS<br>[0.63] | LRI<br>[0.37] | Endocrine<br>[0.68] | Diarrhea<br>[0.81]   | Oth Neuro<br>[0.66]  | Oth Un Inf<br>[0.87] | Meningitis<br>[0.37] | F Body<br>[0.21]     |
| Dorset               | Neonatal<br>[0.56] | Congenital<br>[0.41] | SIDS<br>[0.63] | LRI<br>[0.3]  | Endocrine<br>[0.67] | Diarrhea<br>[0.67]   | F Body<br>[0.24]     | Oth Neuro<br>[0.66]  | Meningitis<br>[0.24] | Oth Un Inf<br>[0.79] |
| Gloucestershire      | Neonatal<br>[0.59] | Congenital<br>[0.44] | SIDS<br>[0.7]  | LRI<br>[0.55] | Endocrine<br>[0.64] | Diarrhea<br>[1.14]   | Oth Neuro<br>[0.83]  | F Body<br>[0.3]      | Meningitis<br>[0.5]  | Oth Un Inf<br>[0.94] |
| N Somerset           | Neonatal<br>[0.5]  | Congenital<br>[0.46] | SIDS<br>[0.81] | LRI<br>[0.37] | Endocrine<br>[0.51] | Diarrhea<br>[0.88]   | Oth Neuro<br>[0.93]  | Meningitis<br>[0.41] | F Body<br>[0.24]     | Oth Un Inf<br>[0.79] |
| Plymouth             | Neonatal<br>[0.52] | Congenital<br>[0.43] | SIDS<br>[0.85] | LRI<br>[0.42] | Endocrine<br>[0.66] | Oth Neuro<br>[0.82]  | Diarrhea<br>[0.76]   | Meningitis<br>[0.46] | Oth Un Inf<br>[0.83] | F Body<br>[0.22]     |
| Poole                | Neonatal<br>[0.45] | Congenital<br>[0.32] | SIDS<br>[0.5]  | LRI<br>[0.32] | Endocrine<br>[0.55] | Oth Un Inf<br>[1.01] | Diarrhea<br>[0.72]   | F Body<br>[0.24]     | Oth Neuro<br>[0.6]   | Iron<br>[4.84]       |
| Somerset             | Neonatal<br>[0.53] | Congenital<br>[0.43] | SIDS<br>[0.58] | LRI<br>[0.3]  | Endocrine<br>[0.62] | Diarrhea<br>[0.69]   | Oth Neuro<br>[0.76]  | Oth Un Inf<br>[0.8]  | F Body<br>[0.2]      | Meningitis<br>[0.3]  |
| S Gloucestershire    | Neonatal<br>[0.54] | Congenital<br>[0.45] | SIDS<br>[0.59] | LRI<br>[0.53] | Endocrine<br>[0.6]  | Diarrhea<br>[1.18]   | Oth Neuro<br>[0.78]  | F Body<br>[0.25]     | Oth Un Inf<br>[0.88] | Meningitis<br>[0.45] |
| Swindon              | Neonatal<br>[0.52] | Congenital<br>[0.38] | SIDS<br>[0.53] | LRI<br>[0.52] | Endocrine<br>[0.55] | Diarrhea<br>[1.0]    | F Body<br>[0.29]     | Oth Neuro<br>[0.66]  | Meningitis<br>[0.43] | Oth Un Inf<br>[0.78] |
| Torbay               | Neonatal<br>[0.53] | Congenital<br>[0.4]  | SIDS<br>[0.69] | LRI<br>[0.18] | Endocrine<br>[0.61] | Diarrhea<br>[0.4]    | Oth Neuro<br>[0.58]  | Oth Un Inf<br>[0.65] | F Body<br>[0.16]     | Meningitis<br>[0.19] |
| Wiltshire            | Neonatal<br>[0.52] | Congenital<br>[0.4]  | SIDS<br>[0.63] | LRI<br>[0.39] | Endocrine<br>[0.59] | Diarrhea<br>[0.82]   | Meningitis<br>[0.43] | Oth Neuro<br>[0.72]  | Oth Un Inf<br>[0.76] | F Body<br>[0.2]      |
| W Midlands           | Neonatal<br>[1.07] | Congenital<br>[0.8]  | SIDS<br>[0.78] | LRI<br>[0.7]  | Endocrine<br>[1.14] | Diarrhea<br>[1.13]   | F Body<br>[0.41]     | Oth Neuro<br>[1.06]  | Meningitis<br>[0.61] | Oth Un Inf<br>[1.22] |
| Birmingham           | Neonatal<br>[1.49] | Congenital<br>[1.12] | SIDS<br>[0.94] | LRI<br>[1.15] | Endocrine<br>[1.62] | F Body<br>[0.64]     | Diarrhea<br>[1.54]   | Oth Neuro<br>[1.45]  | Meningitis<br>[0.86] | Oth Un Inf<br>[1.78] |

**eFigure 7b. Leading ten causes of DALYs with the ratio of observed DALYs to DALYs expected on the basis of Socio-Demographic Index alone in 2017, <1 years, both sexes combined.** The top ten causes contributing to DALYs are listed globally, by socio-demographic quintile, and then by GBD superregion, region, country, and subnationally where modeled. For each cell, the ratio of observed DALYs to DALYs expected on the basis of socio-demographic index (SDI) alone are listed. Abbreviations: DALY=disability-adjusted life year, GBD=Global Burden of Disease.

Values shown in brackets represent the ratio of observed DALYs to predicted DALYs on the basis of Socio-Demographic Index (SDI), rounded to two (2) digits. Color ranges (shown below) were calculated to place a roughly equal number of cells into each bin.

| COLOR KEY:            |                    | [0.0-0.33]           | (0.33-0.46]    | (0.46-0.58]   | (0.58-0.7]          | (0.7-0.84]           | (0.84-1.03]          | (1.03-1.38]          | (1.38-2.46]          | 2.46+                |
|-----------------------|--------------------|----------------------|----------------|---------------|---------------------|----------------------|----------------------|----------------------|----------------------|----------------------|
|                       | 1                  | 2                    | 3              | 4             | 5                   | 6                    | 7                    | 8                    | 9                    | 10                   |
| Coventry              | Neonatal<br>[1.09] | Congenital<br>[0.79] | SIDS<br>[0.92] | LRI<br>[0.91] | Endocrine<br>[1.25] | Meningitis<br>[1.09] | Diarrhea<br>[1.65]   | Oth Neuro<br>[1.31]  | F Body<br>[0.51]     | CMP<br>[1.18]        |
| Dudley                | Neonatal<br>[0.74] | Congenital<br>[0.62] | SIDS<br>[0.66] | LRI<br>[0.36] | Endocrine<br>[0.99] | Diarrhea<br>[0.78]   | Meningitis<br>[0.38] | Oth Un Inf<br>[0.94] | Oth Neuro<br>[0.75]  | F Body<br>[0.22]     |
| Herefordshire         | Neonatal<br>[0.69] | Congenital<br>[0.6]  | SIDS<br>[0.74] | LRI<br>[0.44] | Endocrine<br>[0.79] | Diarrhea<br>[0.96]   | F Body<br>[0.34]     | Oth Neuro<br>[0.91]  | Oth Un Inf<br>[0.94] | Meningitis<br>[0.39] |
| Sandwell              | Neonatal<br>[0.99] | Congenital<br>[0.74] | SIDS<br>[0.78] | LRI<br>[0.47] | Endocrine<br>[1.33] | Diarrhea<br>[0.79]   | F Body<br>[0.36]     | Meningitis<br>[0.4]  | Oth Un Inf<br>[1.01] | Oth Neuro<br>[0.81]  |
| Shropshire            | Neonatal<br>[0.59] | Congenital<br>[0.45] | SIDS<br>[0.47] | LRI<br>[0.31] | Endocrine<br>[0.47] | Diarrhea<br>[0.68]   | Oth Neuro<br>[0.64]  | Meningitis<br>[0.3]  | URI<br>[1.17]        | Oth Un Inf<br>[0.58] |
| Solihull              | Neonatal<br>[0.89] | Congenital<br>[0.67] | SIDS<br>[0.56] | LRI<br>[0.6]  | Endocrine<br>[0.83] | Diarrhea<br>[1.3]    | F Body<br>[0.33]     | Oth Un Inf<br>[1.13] | Oth Neuro<br>[0.71]  | Meningitis<br>[0.5]  |
| Staffordshire         | Neonatal<br>[0.96] | Congenital<br>[0.7]  | SIDS<br>[0.7]  | LRI<br>[0.53] | Endocrine<br>[0.88] | Diarrhea<br>[0.97]   | Oth Neuro<br>[0.94]  | F Body<br>[0.33]     | Oth Un Inf<br>[1.15] | Meningitis<br>[0.48] |
| Stoke-on-Trent        | Neonatal<br>[1.17] | Congenital<br>[0.9]  | SIDS<br>[1.11] | LRI<br>[0.55] | Endocrine<br>[1.06] | Meningitis<br>[0.65] | Oth Neuro<br>[1.25]  | Diarrhea<br>[0.78]   | F Body<br>[0.31]     | CMP<br>[0.98]        |
| Telford & Wrekin      | Neonatal<br>[0.87] | Congenital<br>[0.65] | SIDS<br>[0.88] | LRI<br>[0.56] | Endocrine<br>[0.82] | Meningitis<br>[0.71] | Oth Neuro<br>[1.1]   | F Body<br>[0.35]     | Diarrhea<br>[0.8]    | Oth Un Inf<br>[0.85] |
| Walsall               | Neonatal<br>[1.0]  | Congenital<br>[0.77] | SIDS<br>[0.68] | LRI<br>[0.49] | Endocrine<br>[1.31] | F Body<br>[0.42]     | Meningitis<br>[0.49] | Oth Neuro<br>[1.19]  | Diarrhea<br>[0.69]   | Oth Un Inf<br>[1.2]  |
| Warwickshire          | Neonatal<br>[0.92] | Congenital<br>[0.66] | SIDS<br>[0.49] | LRI<br>[0.7]  | Endocrine<br>[0.87] | Diarrhea<br>[1.4]    | Oth Neuro<br>[0.73]  | Oth Un Inf<br>[1.07] | F Body<br>[0.28]     | Meningitis<br>[0.49] |
| Wolverhampton         | Neonatal<br>[0.93] | Congenital<br>[0.69] | SIDS<br>[0.85] | LRI<br>[0.54] | Endocrine<br>[1.04] | Diarrhea<br>[0.91]   | F Body<br>[0.38]     | Oth Neuro<br>[0.95]  | Meningitis<br>[0.46] | Oth Un Inf<br>[0.95] |
| Worcestershire        | Neonatal<br>[0.83] | Congenital<br>[0.65] | SIDS<br>[0.74] | LRI<br>[0.62] | Endocrine<br>[0.91] | Diarrhea<br>[1.0]    | F Body<br>[0.39]     | Oth Neuro<br>[0.98]  | Meningitis<br>[0.55] | Oth Un Inf<br>[1.04] |
| Yorkshire & Humber    | Neonatal<br>[0.66] | Congenital<br>[0.52] | SIDS<br>[0.71] | LRI<br>[0.54] | Endocrine<br>[0.77] | Oth Neuro<br>[0.98]  | Diarrhea<br>[0.85]   | Meningitis<br>[0.52] | F Body<br>[0.28]     | Oth Un Inf<br>[0.91] |
| Barnsley              | Neonatal<br>[0.41] | Congenital<br>[0.34] | SIDS<br>[0.79] | LRI<br>[0.27] | Endocrine<br>[0.52] | Oth Neuro<br>[1.04]  | Meningitis<br>[0.38] | Diarrhea<br>[0.57]   | F Body<br>[0.23]     | Iron<br>[2.93]       |
| Bradford              | Neonatal<br>[0.74] | Congenital<br>[0.62] | SIDS<br>[0.8]  | LRI<br>[0.53] | Endocrine<br>[0.93] | Oth Neuro<br>[1.58]  | Meningitis<br>[0.46] | F Body<br>[0.31]     | Diarrhea<br>[0.71]   | Oth Un Inf<br>[0.97] |
| Calderdale            | Neonatal<br>[0.63] | Congenital<br>[0.47] | SIDS<br>[0.9]  | LRI<br>[0.53] | Endocrine<br>[0.86] | Meningitis<br>[0.58] | F Body<br>[0.33]     | Diarrhea<br>[0.82]   | Oth Neuro<br>[0.87]  | Oth Un Inf<br>[0.83] |
| Doncaster             | Neonatal<br>[0.6]  | Congenital<br>[0.51] | SIDS<br>[0.76] | LRI<br>[0.34] | Endocrine<br>[0.73] | Oth Neuro<br>[1.0]   | Meningitis<br>[0.35] | Diarrhea<br>[0.51]   | Oth Un Inf<br>[0.78] | F Body<br>[0.2]      |
| E Riding of Yorkshire | Neonatal<br>[0.44] | Congenital<br>[0.39] | SIDS<br>[0.6]  | LRI<br>[0.34] | Endocrine<br>[0.59] | Oth Neuro<br>[0.76]  | Diarrhea<br>[0.64]   | Meningitis<br>[0.36] | F Body<br>[0.21]     | Iron<br>[4.35]       |
| Kingston upon Hull    | Neonatal<br>[0.55] | Congenital<br>[0.4]  | SIDS<br>[0.71] | LRI<br>[0.41] | Endocrine<br>[0.62] | Oth Neuro<br>[0.92]  | F Body<br>[0.3]      | Meningitis<br>[0.41] | Diarrhea<br>[0.64]   | Iron<br>[4.6]        |
| Kirklees              | Neonatal<br>[0.69] | Congenital<br>[0.56] | SIDS<br>[0.68] | LRI<br>[0.48] | Endocrine<br>[0.82] | Oth Neuro<br>[0.86]  | Diarrhea<br>[0.67]   | F Body<br>[0.27]     | Meningitis<br>[0.39] | Oth Un Inf<br>[0.8]  |
| Leeds                 | Neonatal<br>[0.85] | Congenital<br>[0.6]  | SIDS<br>[0.74] | LRI<br>[0.92] | Endocrine<br>[0.93] | Diarrhea<br>[1.44]   | Meningitis<br>[0.88] | Oth Un Inf<br>[1.41] | Oth Neuro<br>[0.85]  | F Body<br>[0.35]     |
| NE Lincolnshire       | Neonatal<br>[0.49] | Congenital<br>[0.38] | SIDS<br>[0.8]  | LRI<br>[0.35] | Endocrine<br>[0.73] | Oth Neuro<br>[1.08]  | F Body<br>[0.24]     | Diarrhea<br>[0.48]   | Meningitis<br>[0.29] | Oth Un Inf<br>[0.77] |
| N Lincolnshire        | Neonatal<br>[0.53] | Congenital<br>[0.4]  | SIDS<br>[0.65] | LRI<br>[0.37] | Endocrine<br>[0.68] | Diarrhea<br>[0.66]   | Oth Neuro<br>[0.86]  | F Body<br>[0.27]     | Meningitis<br>[0.34] | Iron<br>[3.44]       |
| N Yorkshire           | Neonatal<br>[0.49] | Congenital<br>[0.4]  | SIDS<br>[0.64] | LRI<br>[0.38] | Endocrine<br>[0.58] | Diarrhea<br>[0.8]    | Oth Neuro<br>[0.7]   | Meningitis<br>[0.4]  | Oth Un Inf<br>[0.75] | URI<br>[1.22]        |
| Rotherham             | Neonatal<br>[0.55] | Congenital<br>[0.45] | SIDS<br>[0.57] | LRI<br>[0.34] | Endocrine<br>[0.58] | Meningitis<br>[0.42] | Oth Neuro<br>[0.82]  | F Body<br>[0.23]     | Diarrhea<br>[0.45]   | Iron<br>[2.76]       |
| Sheffield             | Neonatal<br>[0.82] | Congenital<br>[0.66] | SIDS<br>[0.66] | LRI<br>[0.76] | Endocrine<br>[0.9]  | Diarrhea<br>[1.3]    | Oth Neuro<br>[1.11]  | Meningitis<br>[0.79] | F Body<br>[0.35]     | Oth Un Inf<br>[1.16] |
| Wakefield             | Neonatal<br>[0.55] | Congenital<br>[0.41] | SIDS<br>[0.63] | LRI<br>[0.39] | Endocrine<br>[0.64] | Diarrhea<br>[0.69]   | Oth Neuro<br>[0.77]  | Meningitis<br>[0.34] | F Body<br>[0.23]     | Oth Un Inf<br>[0.65] |
| York                  | Neonatal<br>[0.71] | Congenital<br>[0.51] | SIDS<br>[0.74] | LRI<br>[0.81] | Endocrine<br>[0.6]  | Oth Neuro<br>[1.03]  | Diarrhea<br>[1.22]   | Meningitis<br>[0.77] | F Body<br>[0.33]     | Oth Un Inf<br>[1.12] |
| N Ireland             | Neonatal<br>[0.84] | Congenital<br>[0.74] | SIDS<br>[0.54] | LRI<br>[0.48] | Endocrine<br>[0.67] | Diarrhea<br>[1.03]   | Meningitis<br>[0.49] | F Body<br>[0.27]     | Oth Un Inf<br>[0.95] | ALS<br>[2.29]        |
| Scotland              | Neonatal<br>[0.5]  | Congenital<br>[0.43] | SIDS<br>[0.76] | LRI<br>[0.29] | Endocrine<br>[0.57] | Diarrhea<br>[0.68]   | Meningitis<br>[0.37] | F Body<br>[0.24]     | Oth Neuro<br>[0.68]  | Oth Un Inf<br>[0.79] |

**eFigure 7b. Leading ten causes of DALYs with the ratio of observed DALYs to DALYs expected on the basis of Socio-Demographic Index alone in 2017, <1 years, both sexes combined.** The top ten causes contributing to DALYs are listed globally, by socio-demographic quintile, and then by GBD superregion, region, country, and subnationally where modeled. For each cell, the ratio of observed DALYs to DALYs expected on the basis of socio-demographic index (SDI) alone are listed. Abbreviations: DALY=disability-adjusted life year, GBD=Global Burden of Disease.

Values shown in brackets represent the ratio of observed DALYs to predicted DALYs on the basis of Socio-Demographic Index (SDI), rounded to two (2) digits. Color ranges (shown below) were calculated to place a roughly equal number of cells into each bin.

| COLOR KEY:                  |                    | [0.0-0.33]           | [0.33-0.46]          | [0.46-0.58]           | [0.58-0.7]           | [0.7-0.84]           | [0.84-1.03]          | [1.03-1.38]          | [1.38-2.46]          | 2.46+                |
|-----------------------------|--------------------|----------------------|----------------------|-----------------------|----------------------|----------------------|----------------------|----------------------|----------------------|----------------------|
|                             | 1                  | 2                    | 3                    | 4                     | 5                    | 6                    | 7                    | 8                    | 9                    | 10                   |
| Wales                       | Neonatal<br>[0.49] | Congenital<br>[0.39] | SIDS<br>[0.6]        | LRI<br>[0.31]         | Endocrine<br>[0.56]  | Diarrhea<br>[0.69]   | Meningitis<br>[0.36] | F Body<br>[0.22]     | Oth Neuro<br>[0.67]  | Oth Un Inf<br>[0.77] |
| Latin America and Caribbean | Neonatal<br>[0.63] | Congenital<br>[0.67] | LRI<br>[0.6]         | Diarrhea<br>[1.34]    | STI<br>[3.06]        | F Body<br>[0.93]     | PEM<br>[2.61]        | Meningitis<br>[0.37] | Ileus<br>[1.21]      | SIDS<br>[0.32]       |
| Andean Latin America        | Neonatal<br>[0.57] | Congenital<br>[0.59] | LRI<br>[0.7]         | F Body<br>[1.72]      | STI<br>[3.25]        | Diarrhea<br>[0.63]   | PEM<br>[1.84]        | HIV<br>[3.43]        | Whooping<br>[2.23]   | Meningitis<br>[0.21] |
| Bolivia                     | Neonatal<br>[0.69] | Congenital<br>[0.71] | LRI<br>[0.69]        | STI<br>[3.58]         | F Body<br>[1.58]     | Diarrhea<br>[0.46]   | PEM<br>[1.89]        | Meningitis<br>[0.24] | Whooping<br>[1.52]   | HIV<br>[2.59]        |
| Ecuador                     | Neonatal<br>[0.58] | Congenital<br>[0.6]  | LRI<br>[0.59]        | STI<br>[4.63]         | F Body<br>[0.86]     | Diarrhea<br>[0.49]   | PEM<br>[1.75]        | Ileus<br>[0.86]      | Meningitis<br>[0.19] | Endocrine<br>[0.67]  |
| Peru                        | Neonatal<br>[0.47] | Congenital<br>[0.51] | LRI<br>[0.65]        | F Body<br>[2.08]      | Diarrhea<br>[0.66]   | STI<br>[1.81]        | HIV<br>[4.55]        | Whooping<br>[2.88]   | Iron<br>[3.82]       | PEM<br>[1.2]         |
| Caribbean                   | Neonatal<br>[1.17] | Congenital<br>[0.93] | LRI<br>[1.43]        | Diarrhea<br>[6.13]    | STI<br>[7.23]        | Meningitis<br>[1.48] | Whooping<br>[9.69]   | PEM<br>[4.64]        | F Body<br>[0.9]      | Endocrine<br>[1.63]  |
| Antigua                     | Neonatal<br>[0.71] | Congenital<br>[0.43] | LRI<br>[0.87]        | Endocrine<br>[1.94]   | Diarrhea<br>[0.89]   | STI<br>[2.71]        | Meningitis<br>[0.44] | SIDS<br>[0.3]        | PEM<br>[4.94]        | F Body<br>[0.34]     |
| Bahamas                     | Neonatal<br>[1.01] | Congenital<br>[0.57] | LRI<br>[1.85]        | Endocrine<br>[3.96]   | STI<br>[8.01]        | F Body<br>[0.96]     | HIV<br>[8.57]        | Diarrhea<br>[1.34]   | SIDS<br>[0.41]       | Meningitis<br>[0.75] |
| Barbados                    | Neonatal<br>[1.1]  | Congenital<br>[0.69] | LRI<br>[1.15]        | STI<br>[8.19]         | Endocrine<br>[1.78]  | Diarrhea<br>[0.83]   | Meningitis<br>[0.59] | Bac Skin<br>[17.15]  | Urinary<br>[8.3]     | SIDS<br>[0.23]       |
| Belize                      | Neonatal<br>[0.68] | Congenital<br>[0.49] | LRI<br>[0.46]        | Diarrhea<br>[0.58]    | Endocrine<br>[2.16]  | SIDS<br>[0.8]        | PEM<br>[1.43]        | F Body<br>[0.52]     | STI<br>[0.92]        | HIV<br>[2.77]        |
| Bermuda                     | Neonatal<br>[0.56] | Congenital<br>[0.29] | LRI<br>[0.59]        | STI<br>[7.99]         | SIDS<br>[0.38]       | Endocrine<br>[1.22]  | Diarrhea<br>[0.65]   | HIV<br>[2.45]        | Meningitis<br>[0.28] | Iron<br>[3.33]       |
| Cuba                        | Neonatal<br>[0.21] | Congenital<br>[0.27] | LRI<br>[0.25]        | Endocrine<br>[0.63]   | F Body<br>[0.26]     | Diarrhea<br>[0.28]   | Meningitis<br>[0.22] | STI<br>[0.78]        | SIDS<br>[0.1]        | HIV<br>[1.08]        |
| Dominica                    | Neonatal<br>[2.11] | Congenital<br>[1.36] | LRI<br>[1.78]        | SIDS<br>[2.24]        | Endocrine<br>[4.53]  | Diarrhea<br>[1.58]   | F Body<br>[1.07]     | PEM<br>[7.89]        | Meningitis<br>[0.81] | Bac Skin<br>[20.06]  |
| Dominican Rep               | Neonatal<br>[1.13] | Congenital<br>[0.57] | LRI<br>[0.39]        | STI<br>[5.28]         | Diarrhea<br>[0.67]   | Meningitis<br>[0.44] | Whooping<br>[2.72]   | F Body<br>[0.46]     | SIDS<br>[0.55]       | HIV<br>[2.85]        |
| Grenada                     | Neonatal<br>[0.62] | Congenital<br>[0.34] | LRI<br>[0.44]        | Endocrine<br>[1.25]   | STI<br>[0.87]        | Diarrhea<br>[0.21]   | F Body<br>[0.26]     | PEM<br>[1.04]        | Iron<br>[2.46]       | Meningitis<br>[0.12] |
| Guyana                      | Neonatal<br>[0.92] | Congenital<br>[0.4]  | LRI<br>[0.33]        | Diarrhea<br>[0.75]    | PEM<br>[1.75]        | STI<br>[1.2]         | F Body<br>[0.62]     | Endocrine<br>[1.65]  | HIV<br>[2.91]        | Ileus<br>[0.88]      |
| Haiti                       | Neonatal<br>[0.64] | LRI<br>[0.74]        | Diarrhea<br>[1.46]   | Congenital<br>[1.12]  | Meningitis<br>[0.82] | STI<br>[1.42]        | Whooping<br>[1.39]   | PEM<br>[0.77]        | F Body<br>[1.32]     | Tetanus<br>[10.88]   |
| Jamaica                     | Neonatal<br>[1.37] | Congenital<br>[0.57] | STI<br>[11.53]       | LRI<br>[0.32]         | SIDS<br>[0.46]       | Diarrhea<br>[0.5]    | PEM<br>[2.85]        | Endocrine<br>[0.9]   | Meningitis<br>[0.28] | F Body<br>[0.31]     |
| Puerto Rico                 | Neonatal<br>[1.15] | Congenital<br>[0.7]  | LRI<br>[1.54]        | Disaster<br>[7219.55] | Endocrine<br>[1.8]   | STI<br>[10.49]       | Diarrhea<br>[2.5]    | F Body<br>[0.63]     | SIDS<br>[0.15]       | Meningitis<br>[0.59] |
| St Lucia                    | Neonatal<br>[0.83] | Congenital<br>[0.38] | STI<br>[12.39]       | LRI<br>[0.33]         | Diarrhea<br>[0.46]   | Endocrine<br>[1.06]  | SIDS<br>[0.39]       | PEM<br>[1.36]        | F Body<br>[0.25]     | Meningitis<br>[0.19] |
| St Vincent                  | Neonatal<br>[0.76] | Congenital<br>[0.46] | LRI<br>[0.36]        | Diarrhea<br>[0.5]     | Endocrine<br>[2.41]  | PEM<br>[2.14]        | STI<br>[1.13]        | F Body<br>[0.37]     | Meningitis<br>[0.25] | HIV<br>[1.8]         |
| Suriname                    | Neonatal<br>[1.47] | Congenital<br>[0.81] | LRI<br>[0.71]        | Diarrhea<br>[2.22]    | STI<br>[3.5]         | F Body<br>[1.11]     | Endocrine<br>[2.04]  | PEM<br>[2.94]        | Meningitis<br>[0.51] | Ileus<br>[2.08]      |
| Trinidad Tobago             | Neonatal<br>[1.24] | Congenital<br>[0.92] | LRI<br>[0.76]        | F Body<br>[1.05]      | Diarrhea<br>[1.14]   | Endocrine<br>[1.99]  | STI<br>[3.19]        | SIDS<br>[0.33]       | Meningitis<br>[0.31] | Ileus<br>[1.14]      |
| Virgin Isl US               | Neonatal<br>[1.19] | Congenital<br>[0.64] | LRI<br>[1.1]         | SIDS<br>[0.71]        | STI<br>[10.73]       | Endocrine<br>[1.56]  | Violence<br>[2.25]   | F Body<br>[0.53]     | Diarrhea<br>[1.11]   | PEM<br>[14.5]        |
| Central Latin America       | Neonatal<br>[0.5]  | Congenital<br>[0.56] | LRI<br>[0.46]        | Diarrhea<br>[0.8]     | F Body<br>[0.75]     | PEM<br>[1.95]        | STI<br>[1.39]        | Ileus<br>[1.11]      | SIDS<br>[0.38]       | Meningitis<br>[0.19] |
| Colombia                    | Neonatal<br>[0.55] | Congenital<br>[0.56] | LRI<br>[0.37]        | PEM<br>[3.34]         | Diarrhea<br>[0.51]   | F Body<br>[0.58]     | STI<br>[1.32]        | Meningitis<br>[0.25] | Ileus<br>[0.87]      | Violence<br>[1.17]   |
| Costa Rica                  | Neonatal<br>[0.41] | Congenital<br>[0.53] | LRI<br>[0.14]        | Diarrhea<br>[0.36]    | STI<br>[1.1]         | Meningitis<br>[0.15] | F Body<br>[0.13]     | Endocrine<br>[0.31]  | SIDS<br>[0.12]       | Oth Un Inf<br>[0.44] |
| El Salvador                 | Neonatal<br>[0.37] | Congenital<br>[0.55] | LRI<br>[0.29]        | Diarrhea<br>[0.53]    | HIV<br>[3.62]        | Whooping<br>[1.51]   | PEM<br>[0.64]        | Meningitis<br>[0.16] | SIDS<br>[0.31]       | STI<br>[0.41]        |
| Guatemala                   | Neonatal<br>[0.49] | LRI<br>[0.74]        | Congenital<br>[0.51] | Diarrhea<br>[0.65]    | PEM<br>[0.98]        | F Body<br>[0.7]      | SIDS<br>[0.91]       | Ileus<br>[1.33]      | Meningitis<br>[0.19] | STI<br>[0.45]        |
| Honduras                    | Neonatal<br>[0.32] | Congenital<br>[0.18] | Diarrhea<br>[0.33]   | LRI<br>[0.07]         | Endocrine<br>[3.33]  | Ileus<br>[1.19]      | Whooping<br>[0.53]   | Violence<br>[2.24]   | F Body<br>[0.26]     | Enceph<br>[0.72]     |

**eFigure 7b. Leading ten causes of DALYs with the ratio of observed DALYs to DALYs expected on the basis of Socio-Demographic Index alone in 2017, <1 years, both sexes combined.** The top ten causes contributing to DALYs are listed globally, by socio-demographic quintile, and then by GBD superregion, region, country, and subnationally where modeled. For each cell, the ratio of observed DALYs to DALYs expected on the basis of socio-demographic index (SDI) alone are listed. Abbreviations: DALY=disability-adjusted life year, GBD=Global Burden of Disease.

Values shown in brackets represent the ratio of observed DALYs to predicted DALYs on the basis of Socio-Demographic Index (SDI), rounded to two (2) digits. Color ranges (shown below) were calculated to place a roughly equal number of cells into each bin.

| COLOR KEY:      |                    | [0.0-0.33]           | [0.33-0.46]   | [0.46-0.58]        | [0.58-0.7]         | [0.7-0.84]         | [0.84-1.03]        | [1.03-1.38]          | [1.38-2.46]          | 2.46+                |
|-----------------|--------------------|----------------------|---------------|--------------------|--------------------|--------------------|--------------------|----------------------|----------------------|----------------------|
|                 | 1                  | 2                    | 3             | 4                  | 5                  | 6                  | 7                  | 8                    | 9                    | 10                   |
| Mexico          | Neonatal<br>[0.43] | Congenital<br>[0.59] | LRI<br>[0.37] | Diarrhea<br>[0.62] | F Body<br>[0.87]   | PEM<br>[1.69]      | Ileus<br>[1.21]    | SIDS<br>[0.43]       | STI<br>[0.88]        | Violence<br>[1.91]   |
| Aguascalientes  | Neonatal<br>[0.51] | Congenital<br>[0.7]  | LRI<br>[0.36] | F Body<br>[1.26]   | Diarrhea<br>[0.84] | PEM<br>[2.42]      | Ileus<br>[1.12]    | STI<br>[0.99]        | SIDS<br>[0.31]       | Violence<br>[1.48]   |
| Baja CA         | Neonatal<br>[0.37] | Congenital<br>[0.49] | LRI<br>[0.32] | F Body<br>[1.59]   | Diarrhea<br>[0.42] | STI<br>[1.31]      | Violence<br>[1.96] | SIDS<br>[0.32]       | Ileus<br>[0.9]       | Meningitis<br>[0.17] |
| Baja CA Sur     | Neonatal<br>[0.43] | Congenital<br>[0.53] | LRI<br>[0.33] | F Body<br>[0.63]   | Diarrhea<br>[0.53] | SIDS<br>[0.31]     | PEM<br>[1.61]      | Violence<br>[1.72]   | STI<br>[0.81]        | Ileus<br>[0.67]      |
| Campeche        | Neonatal<br>[0.49] | Congenital<br>[0.54] | LRI<br>[0.27] | Diarrhea<br>[0.46] | F Body<br>[0.53]   | PEM<br>[1.23]      | SIDS<br>[0.44]     | Ileus<br>[0.99]      | STI<br>[0.66]        | Violence<br>[1.57]   |
| Chiapas         | Neonatal<br>[0.17] | Congenital<br>[0.36] | LRI<br>[0.27] | Diarrhea<br>[0.45] | PEM<br>[0.73]      | F Body<br>[0.41]   | Ileus<br>[0.98]    | STI<br>[0.34]        | SIDS<br>[0.28]       | Violence<br>[1.2]    |
| Chihuahua       | Neonatal<br>[0.66] | Congenital<br>[0.75] | LRI<br>[0.52] | F Body<br>[2.16]   | Diarrhea<br>[0.7]  | SIDS<br>[0.63]     | Violence<br>[3.03] | PEM<br>[2.03]        | STI<br>[1.27]        | Ileus<br>[1.15]      |
| Coahuila        | Neonatal<br>[0.66] | Congenital<br>[0.69] | LRI<br>[0.39] | F Body<br>[1.31]   | Diarrhea<br>[0.57] | SIDS<br>[0.4]      | STI<br>[1.02]      | PEM<br>[1.53]        | Violence<br>[1.83]   | Ileus<br>[0.99]      |
| Colima          | Neonatal<br>[0.47] | Congenital<br>[0.62] | LRI<br>[0.35] | Diarrhea<br>[0.76] | F Body<br>[0.61]   | PEM<br>[2.67]      | STI<br>[1.19]      | Violence<br>[2.2]    | SIDS<br>[0.35]       | Ileus<br>[1.14]      |
| Mexico City     | Neonatal<br>[0.82] | Congenital<br>[1.06] | LRI<br>[1.43] | F Body<br>[1.11]   | Diarrhea<br>[1.39] | Ileus<br>[2.66]    | Violence<br>[2.81] | STI<br>[2.32]        | Meningitis<br>[0.32] | PEM<br>[3.72]        |
| Durango         | Neonatal<br>[0.57] | Congenital<br>[0.62] | LRI<br>[0.28] | F Body<br>[1.01]   | Diarrhea<br>[0.41] | SIDS<br>[0.46]     | Violence<br>[2.24] | STI<br>[0.87]        | PEM<br>[0.98]        | Ileus<br>[0.87]      |
| Guanajuato      | Neonatal<br>[0.41] | Congenital<br>[0.57] | LRI<br>[0.24] | Diarrhea<br>[0.4]  | F Body<br>[0.58]   | STI<br>[0.9]       | SIDS<br>[0.46]     | PEM<br>[1.08]        | Ileus<br>[0.84]      | Violence<br>[1.46]   |
| Guerrero        | Neonatal<br>[0.27] | Congenital<br>[0.54] | LRI<br>[0.22] | Diarrhea<br>[0.38] | F Body<br>[0.69]   | PEM<br>[0.95]      | Violence<br>[2.75] | SIDS<br>[0.56]       | Ileus<br>[0.91]      | STI<br>[0.44]        |
| Hidalgo         | Neonatal<br>[0.27] | Congenital<br>[0.36] | LRI<br>[0.14] | F Body<br>[0.75]   | SIDS<br>[0.78]     | Diarrhea<br>[0.2]  | Ileus<br>[0.92]    | PEM<br>[0.57]        | STI<br>[0.37]        | Violence<br>[1.3]    |
| Jalisco         | Neonatal<br>[0.43] | Congenital<br>[0.64] | LRI<br>[0.34] | F Body<br>[0.77]   | Diarrhea<br>[0.49] | STI<br>[1.11]      | PEM<br>[1.67]      | Ileus<br>[1.06]      | Violence<br>[1.72]   | SIDS<br>[0.21]       |
| Mexico          | Neonatal<br>[0.47] | Congenital<br>[0.57] | LRI<br>[0.45] | F Body<br>[1.14]   | Diarrhea<br>[0.61] | Ileus<br>[1.7]     | PEM<br>[1.56]      | Violence<br>[2.23]   | STI<br>[0.95]        | SIDS<br>[0.23]       |
| Michoacan       | Neonatal<br>[0.27] | Congenital<br>[0.56] | LRI<br>[0.28] | F Body<br>[1.04]   | Diarrhea<br>[0.39] | PEM<br>[1.06]      | SIDS<br>[0.51]     | Ileus<br>[1.03]      | STI<br>[0.6]         | Violence<br>[2.18]   |
| Morelos         | Neonatal<br>[0.39] | Congenital<br>[0.53] | LRI<br>[0.21] | Diarrhea<br>[0.52] | F Body<br>[0.51]   | PEM<br>[1.43]      | Violence<br>[2.04] | Ileus<br>[0.98]      | STI<br>[0.79]        | SIDS<br>[0.32]       |
| Nayarit         | Neonatal<br>[0.29] | Congenital<br>[0.47] | LRI<br>[0.21] | Diarrhea<br>[0.38] | F Body<br>[0.42]   | STI<br>[0.86]      | SIDS<br>[0.38]     | Violence<br>[1.8]    | PEM<br>[0.78]        | Ileus<br>[0.69]      |
| Nuevo Leon      | Neonatal<br>[0.51] | Congenital<br>[0.75] | LRI<br>[0.41] | F Body<br>[1.38]   | Diarrhea<br>[0.48] | STI<br>[1.43]      | Violence<br>[1.88] | Meningitis<br>[0.21] | Ileus<br>[0.87]      | SIDS<br>[0.21]       |
| Oaxaca          | Neonatal<br>[0.2]  | Congenital<br>[0.45] | LRI<br>[0.2]  | Diarrhea<br>[0.39] | PEM<br>[1.18]      | F Body<br>[0.53]   | Ileus<br>[0.88]    | STI<br>[0.44]        | Violence<br>[1.82]   | SIDS<br>[0.3]        |
| Puebla          | Neonatal<br>[0.47] | Congenital<br>[0.68] | LRI<br>[0.38] | Diarrhea<br>[0.44] | SIDS<br>[1.2]      | F Body<br>[0.83]   | PEM<br>[1.37]      | Ileus<br>[1.73]      | STI<br>[0.52]        | Violence<br>[1.56]   |
| Queretaro       | Neonatal<br>[0.42] | Congenital<br>[0.64] | LRI<br>[0.32] | F Body<br>[1.06]   | Diarrhea<br>[0.6]  | SIDS<br>[0.5]      | PEM<br>[1.78]      | Ileus<br>[1.29]      | STI<br>[0.72]        | Violence<br>[1.49]   |
| Quintana Roo    | Neonatal<br>[0.4]  | Congenital<br>[0.51] | LRI<br>[0.27] | Diarrhea<br>[0.54] | F Body<br>[0.88]   | PEM<br>[1.18]      | Ileus<br>[0.98]    | Violence<br>[1.73]   | STI<br>[0.63]        | HIV<br>[1.55]        |
| San Luis Potosi | Neonatal<br>[0.36] | Congenital<br>[0.73] | LRI<br>[0.37] | Diarrhea<br>[0.61] | F Body<br>[0.93]   | SIDS<br>[0.95]     | PEM<br>[1.78]      | Ileus<br>[1.16]      | STI<br>[0.85]        | Violence<br>[1.8]    |
| Sinaloa         | Neonatal<br>[0.4]  | Congenital<br>[0.55] | LRI<br>[0.31] | Diarrhea<br>[0.47] | F Body<br>[0.48]   | STI<br>[1.16]      | Violence<br>[2.32] | PEM<br>[1.22]        | SIDS<br>[0.25]       | Ileus<br>[0.54]      |
| Sonora          | Neonatal<br>[0.42] | Congenital<br>[0.53] | LRI<br>[0.36] | Diarrhea<br>[0.67] | F Body<br>[0.82]   | SIDS<br>[0.6]      | PEM<br>[1.87]      | STI<br>[0.96]        | Violence<br>[1.8]    | Ileus<br>[0.8]       |
| Tabasco         | Neonatal<br>[0.63] | Congenital<br>[0.75] | LRI<br>[0.34] | Diarrhea<br>[0.59] | F Body<br>[0.75]   | PEM<br>[1.76]      | Ileus<br>[0.91]    | STI<br>[0.65]        | Violence<br>[1.74]   | SIDS<br>[0.34]       |
| Tamaulipas      | Neonatal<br>[0.53] | Congenital<br>[0.61] | LRI<br>[0.29] | F Body<br>[0.92]   | Diarrhea<br>[0.45] | STI<br>[1.05]      | Violence<br>[2.06] | PEM<br>[1.34]        | Ileus<br>[0.78]      | SIDS<br>[0.25]       |
| Tlaxcala        | Neonatal<br>[0.41] | Congenital<br>[0.56] | LRI<br>[0.35] | SIDS<br>[1.51]     | F Body<br>[0.93]   | Diarrhea<br>[0.39] | Ileus<br>[1.29]    | STI<br>[1.3]         | Violence<br>[0.73]   | Violence<br>[1.46]   |
| Veracruz        | Neonatal<br>[0.34] | Congenital<br>[0.44] | LRI<br>[0.16] | Diarrhea<br>[0.26] | PEM<br>[0.97]      | F Body<br>[0.42]   | Ileus<br>[0.76]    | STI<br>[0.47]        | Violence<br>[1.48]   | SIDS<br>[0.29]       |

**eFigure 7b. Leading ten causes of DALYs with the ratio of observed DALYs to DALYs expected on the basis of Socio-Demographic Index alone in 2017, <1 years, both sexes combined.** The top ten causes contributing to DALYs are listed globally, by socio-demographic quintile, and then by GBD superregion, region, country, and subnationally where modeled. For each cell, the ratio of observed DALYs to DALYs expected on the basis of socio-demographic index (SDI) alone are listed. Abbreviations: DALY=disability-adjusted life year, GBD=Global Burden of Disease.

Values shown in brackets represent the ratio of observed DALYs to predicted DALYs on the basis of Socio-Demographic Index (SDI), rounded to two (2) digits. Color ranges (shown below) were calculated to place a roughly equal number of cells into each bin.

| COLOR KEY:                    |                    | [0.0-0.33]           | [0.33-0.46]    | [0.46-0.58]        | [0.58-0.7]         | [0.7-0.84]           | [0.84-1.03]          | [1.03-1.38]          | [1.38-2.46]         | 2.46+                |
|-------------------------------|--------------------|----------------------|----------------|--------------------|--------------------|----------------------|----------------------|----------------------|---------------------|----------------------|
|                               | 1                  | 2                    | 3              | 4                  | 5                  | 6                    | 7                    | 8                    | 9                   | 10                   |
| Yucatan                       | Neonatal<br>[0.42] | Congenital<br>[0.63] | LRI<br>[0.45]  | Diarrhea<br>[0.68] | F Body<br>[0.62]   | PEM<br>[1.8]         | Ileus<br>[1.24]      | SIDS<br>[0.4]        | STI<br>[0.75]       | Violence<br>[1.43]   |
| Zacatecas                     | Neonatal<br>[0.34] | Congenital<br>[0.47] | LRI<br>[0.28]  | F Body<br>[0.78]   | Diarrhea<br>[0.33] | SIDS<br>[0.82]       | PEM<br>[0.98]        | STI<br>[0.55]        | Ileus<br>[0.73]     | Violence<br>[1.55]   |
| Nicaragua                     | Neonatal<br>[0.36] | Congenital<br>[0.5]  | LRI<br>[0.29]  | Diarrhea<br>[0.25] | PEM<br>[0.62]      | F Body<br>[0.39]     | Meningitis<br>[0.11] | SIDS<br>[0.26]       | HIV<br>[1.18]       | Ileus<br>[0.41]      |
| Panama                        | Neonatal<br>[0.63] | Congenital<br>[0.85] | LRI<br>[0.91]  | Diarrhea<br>[1.94] | STI<br>[6.97]      | F Body<br>[0.92]     | PEM<br>[6.28]        | Meningitis<br>[0.53] | Ileus<br>[1.33]     | HIV<br>[2.34]        |
| Venezuela                     | Neonatal<br>[0.73] | Congenital<br>[0.57] | LRI<br>[0.49]  | STI<br>[6.7]       | Diarrhea<br>[1.38] | F Body<br>[1.12]     | PEM<br>[2.77]        | Meningitis<br>[0.31] | Ileus<br>[0.61]     | Violence<br>[1.03]   |
| <b>Tropical Latin America</b> | Neonatal<br>[0.74] | Congenital<br>[0.82] | LRI<br>[0.55]  | STI<br>[4.99]      | Diarrhea<br>[1.24] | F Body<br>[0.86]     | PEM<br>[3.44]        | Meningitis<br>[0.46] | Ileus<br>[1.54]     | HIV<br>[2.5]         |
| Brazil                        | Neonatal<br>[0.78] | Congenital<br>[0.85] | LRI<br>[0.59]  | Diarrhea<br>[1.33] | STI<br>[4.69]      | F Body<br>[0.89]     | PEM<br>[3.66]        | Meningitis<br>[0.48] | Ileus<br>[1.6]      | CMP<br>[1.28]        |
| Acre                          | Neonatal<br>[0.76] | Congenital<br>[0.87] | LRI<br>[0.51]  | Diarrhea<br>[0.98] | STI<br>[2.05]      | PEM<br>[2.01]        | Ileus<br>[1.48]      | Meningitis<br>[0.3]  | F Body<br>[0.41]    | Oth Un Inf<br>[0.98] |
| Alagoas                       | Neonatal<br>[0.44] | Congenital<br>[0.57] | LRI<br>[0.32]  | Diarrhea<br>[0.78] | STI<br>[1.47]      | PEM<br>[1.37]        | Ileus<br>[1.24]      | Meningitis<br>[0.19] | HIV<br>[1.8]        | Violence<br>[1.67]   |
| Amapa                         | Neonatal<br>[1.32] | Congenital<br>[0.86] | LRI<br>[0.7]   | STI<br>[8.59]      | Diarrhea<br>[1.38] | PEM<br>[3.26]        | Meningitis<br>[0.43] | SIDS<br>[0.48]       | Ileus<br>[1.58]     | Bac Skin<br>[11.94]  |
| Amazonas                      | Neonatal<br>[0.72] | Congenital<br>[0.79] | LRI<br>[0.55]  | STI<br>[6.11]      | Diarrhea<br>[1.46] | PEM<br>[3.24]        | Ileus<br>[1.47]      | Meningitis<br>[0.32] | F Body<br>[0.3]     | Endocrine<br>[0.6]   |
| Bahia                         | Neonatal<br>[0.63] | Congenital<br>[0.91] | LRI<br>[0.44]  | Diarrhea<br>[0.95] | PEM<br>[2.42]      | F Body<br>[1.0]      | Meningitis<br>[0.53] | STI<br>[1.34]        | Ileus<br>[1.93]     | CMP<br>[1.86]        |
| Ceara                         | Neonatal<br>[0.5]  | Congenital<br>[0.74] | LRI<br>[0.33]  | Diarrhea<br>[0.67] | STI<br>[1.93]      | Meningitis<br>[0.34] | PEM<br>[1.18]        | F Body<br>[0.43]     | Ileus<br>[1.11]     | HIV<br>[2.25]        |
| Distrito Federal              | Neonatal<br>[1.59] | Congenital<br>[1.24] | LRI<br>[1.56]  | STI<br>[19.37]     | F Body<br>[1.67]   | Diarrhea<br>[2.75]   | Meningitis<br>[1.05] | HIV<br>[6.63]        | PEM<br>[16.52]      | Ileus<br>[2.06]      |
| Espirito Santo                | Neonatal<br>[0.79] | Congenital<br>[0.93] | LRI<br>[0.45]  | STI<br>[5.6]       | Diarrhea<br>[0.95] | F Body<br>[0.72]     | PEM<br>[3.46]        | Meningitis<br>[0.43] | Ileus<br>[1.07]     | Violence<br>[1.6]    |
| Goiás                         | Neonatal<br>[0.78] | Congenital<br>[0.79] | LRI<br>[0.32]  | STI<br>[4.23]      | Diarrhea<br>[0.54] | F Body<br>[0.53]     | Meningitis<br>[0.35] | Ileus<br>[0.96]      | PEM<br>[1.11]       | Endocrine<br>[0.54]  |
| Maranhao                      | Neonatal<br>[0.33] | Congenital<br>[0.58] | LRI<br>[0.22]  | Diarrhea<br>[0.28] | STI<br>[0.87]      | PEM<br>[0.61]        | F Body<br>[0.41]     | Meningitis<br>[0.15] | Ileus<br>[0.93]     | HIV<br>[1.91]        |
| Mato Grosso                   | Neonatal<br>[0.82] | Congenital<br>[0.77] | LRI<br>[0.49]  | STI<br>[7.2]       | Diarrhea<br>[1.14] | F Body<br>[0.84]     | PEM<br>[3.25]        | Meningitis<br>[0.44] | Ileus<br>[1.49]     | SIDS<br>[0.43]       |
| Mato Grosso do Sul            | Neonatal<br>[0.71] | Congenital<br>[0.85] | LRI<br>[0.44]  | Diarrhea<br>[1.39] | STI<br>[4.08]      | F Body<br>[0.94]     | PEM<br>[2.58]        | Meningitis<br>[0.37] | Ileus<br>[1.26]     | Endocrine<br>[0.83]  |
| Minas Gerais                  | Neonatal<br>[0.75] | Congenital<br>[0.75] | LRI<br>[0.3]   | STI<br>[4.18]      | Diarrhea<br>[0.64] | F Body<br>[0.62]     | Meningitis<br>[0.34] | Ileus<br>[1.17]      | PEM<br>[1.64]       | Endocrine<br>[0.65]  |
| Para                          | Neonatal<br>[0.5]  | Congenital<br>[0.56] | LRI<br>[0.37]  | Diarrhea<br>[0.44] | STI<br>[1.65]      | PEM<br>[0.94]        | Meningitis<br>[0.24] | Ileus<br>[0.99]      | F Body<br>[0.26]    | HIV<br>[1.88]        |
| Paraiba                       | Neonatal<br>[0.32] | Congenital<br>[0.51] | LRI<br>[0.26]  | STI<br>[1.48]      | Diarrhea<br>[0.27] | PEM<br>[0.93]        | Meningitis<br>[0.18] | Ileus<br>[0.78]      | F Body<br>[0.21]    | HIV<br>[1.6]         |
| Parana                        | Neonatal<br>[0.85] | Congenital<br>[1.07] | LRI<br>[0.45]  | F Body<br>[1.6]    | STI<br>[5.59]      | Diarrhea<br>[0.8]    | Meningitis<br>[0.54] | Ileus<br>[1.47]      | PEM<br>[2.71]       | Road Inj<br>[1.41]   |
| Pernambuco                    | Neonatal<br>[0.53] | Congenital<br>[0.81] | LRI<br>[0.34]  | Diarrhea<br>[0.88] | STI<br>[1.93]      | PEM<br>[1.66]        | F Body<br>[0.63]     | Meningitis<br>[0.28] | Ileus<br>[1.25]     | Violence<br>[1.85]   |
| Piaui                         | Neonatal<br>[0.52] | Congenital<br>[0.62] | LRI<br>[0.17]  | Diarrhea<br>[0.33] | STI<br>[1.37]      | PEM<br>[0.55]        | F Body<br>[0.28]     | Meningitis<br>[0.13] | Ileus<br>[0.71]     | HIV<br>[1.77]        |
| Rio de Janeiro                | Neonatal<br>[1.03] | Congenital<br>[0.9]  | LRI<br>[0.91]  | F Body<br>[2.57]   | STI<br>[6.49]      | Diarrhea<br>[1.13]   | Meningitis<br>[0.61] | Ileus<br>[1.56]      | PEM<br>[3.91]       | Violence<br>[1.74]   |
| Rio Grande do Norte           | Neonatal<br>[0.37] | Congenital<br>[0.66] | LRI<br>[0.41]  | Diarrhea<br>[0.66] | STI<br>[2.18]      | PEM<br>[2.67]        | Meningitis<br>[0.36] | F Body<br>[0.49]     | Ileus<br>[1.18]     | Urinary<br>[3.51]    |
| Rio Grande do Sul             | Neonatal<br>[0.83] | Congenital<br>[0.9]  | STI<br>[14.46] | LRI<br>[0.52]      | F Body<br>[1.0]    | Diarrhea<br>[0.62]   | Meningitis<br>[0.39] | Ileus<br>[1.08]      | Endocrine<br>[0.54] | HIV<br>[1.97]        |
| Rondonia                      | Neonatal<br>[0.65] | Congenital<br>[0.78] | LRI<br>[0.34]  | STI<br>[4.38]      | Diarrhea<br>[0.73] | F Body<br>[0.45]     | PEM<br>[1.38]        | Meningitis<br>[0.29] | Ileus<br>[1.0]      | Bac Skin<br>[6.32]   |
| Roraima                       | Neonatal<br>[0.7]  | Congenital<br>[0.83] | LRI<br>[0.81]  | Diarrhea<br>[1.78] | STI<br>[3.98]      | PEM<br>[5.2]         | F Body<br>[0.63]     | Ileus<br>[1.4]       | Endocrine<br>[1.0]  | HIV<br>[3.21]        |
| Santa Catarina                | Neonatal<br>[0.93] | Congenital<br>[0.97] | LRI<br>[0.57]  | STI<br>[7.17]      | F Body<br>[0.97]   | Diarrhea<br>[1.04]   | Meningitis<br>[0.59] | SIDS<br>[0.42]       | Ileus<br>[1.48]     | Road Inj<br>[1.57]   |

**eFigure 7b. Leading ten causes of DALYs with the ratio of observed DALYs to DALYs expected on the basis of Socio-Demographic Index alone in 2017, <1 years, both sexes combined.** The top ten causes contributing to DALYs are listed globally, by socio-demographic quintile, and then by GBD superregion, region, country, and subnationally where modeled. For each cell, the ratio of observed DALYs to DALYs expected on the basis of socio-demographic index (SDI) alone are listed. Abbreviations: DALY=disability-adjusted life year, GBD=Global Burden of Disease.

Values shown in brackets represent the ratio of observed DALYs to predicted DALYs on the basis of Socio-Demographic Index (SDI), rounded to two (2) digits. Color ranges (shown below) were calculated to place a roughly equal number of cells into each bin.

| COLOR KEY:                   |                    | [0.0-0.33]                       | [0.33-0.46]           | [0.46-0.58]                     | [0.58-0.7]                      | [0.7-0.84]                     | [0.84-1.03]                     | [1.03-1.38]          | [1.38-2.46]          | 2.46+                          |
|------------------------------|--------------------|----------------------------------|-----------------------|---------------------------------|---------------------------------|--------------------------------|---------------------------------|----------------------|----------------------|--------------------------------|
|                              | 1                  | 2                                | 3                     | 4                               | 5                               | 6                              | 7                               | 8                    | 9                    | 10                             |
| Sao Paulo                    | Neonatal<br>[1.05] | Congenital<br>[0.95]             | LRI<br>[0.79]         | F Body<br>[1.57]                | STI<br>[7.54]                   | Diarrhea<br>[0.96]             | Meningitis<br>[0.66]            | Ileus<br>[1.86]      | CMP<br>[1.68]        | Endocrine<br>[0.67]            |
| Sergipe                      | Neonatal<br>[0.71] | Congenital<br>[0.69]             | LRI<br>[0.43]         | Diarrhea<br>[0.91]              | STI<br>[2.32]                   | PEM<br>[2.05]                  | F Body<br>[0.61]                | Meningitis<br>[0.3]  | Ileus<br>[1.15]      | HIV<br>[2.08]                  |
| Tocantins                    | Neonatal<br>[0.59] | Congenital<br>[0.68]             | LRI<br>[0.29]         | Diarrhea<br>[0.63]              | STI<br>[2.4]                    | PEM<br>[1.35]                  | Meningitis<br>[0.23]            | F Body<br>[0.31]     | Leish<br>[207.89]    | Ileus<br>[0.85]                |
| Paraguay                     | Neonatal<br>[0.29] | Congenital<br>[0.49]             | STI<br>[10.53]        | LRI<br>[0.28]                   | Diarrhea<br>[0.61]              | PEM<br>[2.76]                  | HIV<br>[4.88]                   | F Body<br>[0.52]     | Meningitis<br>[0.33] | Ileus<br>[1.19]                |
| North Africa and Middle East | Neonatal<br>[0.98] | Congenital<br>[1.11]             | LRI<br>[0.99]         | Diarrhea<br>[2.94]              | Meningitis<br>[0.82]            | SIDS<br>[0.89]                 | Whooping<br>[5.42]              | STI<br>[1.28]        | PEM<br>[1.92]        | Conflict<br>Terror<br>[1411.5] |
| Afghanistan                  | Neonatal<br>[0.56] | LRI<br>[0.57]                    | Congenital<br>[1.27]  | Diarrhea<br>[0.26]              | Meningitis<br>[0.75]            | Whooping<br>[0.71]             | SIDS<br>[0.95]                  | Tetanus<br>[1.06]    | PEM<br>[0.24]        | Measles<br>[0.26]              |
| Algeria                      | Neonatal<br>[0.92] | Congenital<br>[1.31]             | LRI<br>[0.49]         | Diarrhea<br>[0.67]              | SIDS<br>[0.37]                  | F Body<br>[0.44]               | Road Inj<br>[1.73]              | Meningitis<br>[0.25] | Oth Cardio<br>[2.58] | CKD<br>[1.9]                   |
| Bahrain                      | Neonatal<br>[0.39] | Congenital<br>[0.51]             | LRI<br>[0.11]         | Endocrine<br>[0.96]             | SIDS<br>[0.3]                   | Diarrhea<br>[0.26]             | F Body<br>[0.15]                | Road Inj<br>[0.57]   | Stroke<br>[1.15]     | Hemog<br>[2.23]                |
| Egypt                        | Neonatal<br>[0.35] | LRI<br>[0.96]                    | Congenital<br>[0.7]   | Diarrhea<br>[2.58]              | SIDS<br>[0.76]                  | Road Inj<br>[1.88]             | Ileus<br>[1.32]                 | Endocrine<br>[0.94]  | Encepha<br>[1.12]    | CKD<br>[2.01]                  |
| Iran                         | Neonatal<br>[1.01] | Congenital<br>[1.1]              | LRI<br>[0.53]         | Road Inj<br>[3.0]               | SIDS<br>[0.55]                  | Diarrhea<br>[0.57]             | Endocrine<br>[0.97]             | F Body<br>[0.43]     | Ileus<br>[1.46]      | Oth Cardio<br>[3.68]           |
| Iraq                         | Neonatal<br>[0.72] | Congenital<br>[0.78]             | LRI<br>[0.28]         | Conflict<br>Terror<br>[4007.63] | Diarrhea<br>[0.33]              | Meningitis<br>[0.41]           | CMP<br>[3.01]                   | SIDS<br>[0.69]       | Whooping<br>[1.35]   | CKD<br>[2.22]                  |
| Jordan                       | Neonatal<br>[1.11] | Congenital<br>[1.22]             | LRI<br>[0.89]         | SIDS<br>[0.61]                  | F Body<br>[0.53]                | Endocrine<br>[1.17]            | Diarrhea<br>[0.55]              | Road Inj<br>[1.65]   | Meningitis<br>[0.29] | Ileus<br>[0.92]                |
| Kuwait                       | Neonatal<br>[0.67] | Congenital<br>[1.04]             | LRI<br>[0.63]         | SIDS<br>[0.34]                  | Diarrhea<br>[0.91]              | Endocrine<br>[0.66]            | Road Inj<br>[1.05]              | F Body<br>[0.21]     | Meningitis<br>[0.26] | Ileus<br>[0.81]                |
| Lebanon                      | Neonatal<br>[0.52] | Congenital<br>[0.48]             | LRI<br>[0.25]         | Diarrhea<br>[1.21]              | SIDS<br>[0.34]                  | Whooping<br>[5.48]             | F Body<br>[0.28]                | Ileus<br>[0.85]      | Endocrine<br>[0.39]  | Conflict<br>Terror<br>[611.93] |
| Libya                        | Neonatal<br>[0.68] | Congenital<br>[0.55]             | Oth Cardio<br>[15.01] | LRI<br>[0.38]                   | Conflict<br>Terror<br>[3754.35] | CMP<br>[3.41]                  | Diarrhea<br>[1.19]              | Stroke<br>[5.15]     | SIDS<br>[0.28]       | Whooping<br>[9.5]              |
| Morocco                      | Neonatal<br>[0.66] | Congenital<br>[1.07]             | LRI<br>[0.28]         | Diarrhea<br>[0.68]              | Meningitis<br>[0.49]            | SIDS<br>[0.83]                 | STI<br>[1.01]                   | Whooping<br>[1.12]   | Tetanus<br>[62.43]   | F Body<br>[0.26]               |
| Palestine                    | Neonatal<br>[0.44] | Congenital<br>[0.48]             | LRI<br>[0.05]         | SIDS<br>[0.48]                  | Endocrine<br>[0.98]             | Diarrhea<br>[0.06]             | Meningitis<br>[0.11]            | Whooping<br>[0.34]   | CKD<br>[0.93]        | Ileus<br>[0.37]                |
| Oman                         | Neonatal<br>[0.87] | Congenital<br>[0.8]              | LRI<br>[0.42]         | Oth Cardio<br>[11.54]           | Road Inj<br>[4.16]              | Stroke<br>[8.51]               | SIDS<br>[0.48]                  | CMP<br>[2.38]        | Encepha<br>[3.04]    | Diarrhea<br>[0.56]             |
| Qatar                        | Neonatal<br>[0.52] | Congenital<br>[0.75]             | LRI<br>[0.27]         | SIDS<br>[0.29]                  | Road Inj<br>[1.46]              | Endocrine<br>[0.6]             | Diarrhea<br>[0.48]              | Ileus<br>[1.0]       | Oth Neuro<br>[0.83]  | CKD<br>[1.33]                  |
| Saudi Arabia                 | Neonatal<br>[1.05] | Congenital<br>[0.67]             | SIDS<br>[0.49]        | STI<br>[4.15]                   | Diarrhea<br>[1.03]              | Endocrine<br>[0.65]            | Conflict<br>Terror<br>[1311.93] | LRI<br>[0.1]         | Med Treat<br>[1.57]  | Whooping<br>[4.3]              |
| Sudan                        | Neonatal<br>[0.93] | Congenital<br>[1.65]             | Diarrhea<br>[0.87]    | LRI<br>[0.37]                   | STI<br>[1.25]                   | SIDS<br>[0.99]                 | Whooping<br>[0.8]               | Meningitis<br>[0.23] | Road Inj<br>[2.17]   | HIV<br>[3.05]                  |
| Syria                        | Neonatal<br>[0.3]  | Conflict<br>Terror<br>[15226.87] | Congenital<br>[0.44]  | Whooping<br>[6.89]              | LRI<br>[0.06]                   | SIDS<br>[0.67]                 | Measles<br>[7.08]               | Endocrine<br>[0.54]  | Meningitis<br>[0.1]  | Diarrhea<br>[0.07]             |
| Tunisia                      | Neonatal<br>[0.58] | Congenital<br>[0.58]             | LRI<br>[0.2]          | SIDS<br>[0.45]                  | Diarrhea<br>[0.39]              | Mech<br>[4.9]                  | F Body<br>[0.22]                | Whooping<br>[2.46]   | Ileus<br>[0.74]      | Endocrine<br>[0.39]            |
| Turkey                       | Neonatal<br>[1.11] | Congenital<br>[1.1]              | LRI<br>[0.43]         | Endocrine<br>[1.96]             | SIDS<br>[0.49]                  | Diarrhea<br>[0.7]              | F Body<br>[0.31]                | Epilepsy<br>[2.44]   | Ileus<br>[0.9]       | Oth Neuro<br>[1.07]            |
| UAE                          | Neonatal<br>[1.03] | Congenital<br>[1.7]              | SIDS<br>[0.56]        | Med Treat<br>[7.65]             | LRI<br>[0.4]                    | Endocrine<br>[1.11]            | Road Inj<br>[2.56]              | F Body<br>[0.59]     | Diarrhea<br>[1.27]   | Stroke<br>[3.78]               |
| Yemen                        | Neonatal<br>[0.72] | Congenital<br>[0.87]             | Diarrhea<br>[0.9]     | LRI<br>[0.28]                   | Whooping<br>[0.75]              | Conflict<br>Terror<br>[956.05] | PEM<br>[0.38]                   | SIDS<br>[0.83]       | Road Inj<br>[1.84]   | Meningitis<br>[0.13]           |
| South Asia                   | Neonatal<br>[1.17] | LRI<br>[0.95]                    | Congenital<br>[0.55]  | Diarrhea<br>[1.3]               | STI<br>[1.59]                   | PEM<br>[1.31]                  | Meningitis<br>[0.49]            | Malaria<br>[682.13]  | SIDS<br>[0.87]       | Whooping<br>[1.21]             |

**eFigure 7b. Leading ten causes of DALYs with the ratio of observed DALYs to DALYs expected on the basis of Socio-Demographic Index alone in 2017, <1 years, both sexes combined.** The top ten causes contributing to DALYs are listed globally, by socio-demographic quintile, and then by GBD superregion, region, country, and subnationally where modeled. For each cell, the ratio of observed DALYs to DALYs expected on the basis of socio-demographic index (SDI) alone are listed. Abbreviations: DALY=disability-adjusted life year, GBD=Global Burden of Disease.

Values shown in brackets represent the ratio of observed DALYs to predicted DALYs on the basis of Socio-Demographic Index (SDI), rounded to two (2) digits. Color ranges (shown below) were calculated to place a roughly equal number of cells into each bin.

| COLOR KEY:        |                    | [0.0-0.33]           | [0.33-0.46]          | [0.46-0.58]           | [0.58-0.7]            | [0.7-0.84]           | [0.84-1.03]          | [1.03-1.38]          | [1.38-2.46]          | 2.46+                  |
|-------------------|--------------------|----------------------|----------------------|-----------------------|-----------------------|----------------------|----------------------|----------------------|----------------------|------------------------|
|                   | 1                  | 2                    | 3                    | 4                     | 5                     | 6                    | 7                    | 8                    | 9                    | 10                     |
| Bangladesh        | Neonatal<br>[0.83] | LRI<br>[0.58]        | Congenital<br>[0.41] | STI<br>[1.17]         | Diarrhea<br>[0.16]    | PEM<br>[0.5]         | SIDS<br>[0.89]       | Whooping<br>[0.62]   | Tetanus<br>[5.77]    | Ileus<br>[0.61]        |
| Bhutan            | Neonatal<br>[0.81] | LRI<br>[0.56]        | Congenital<br>[0.47] | STI<br>[1.61]         | Diarrhea<br>[0.24]    | SIDS<br>[0.71]       | Meningitis<br>[0.23] | Enceph<br>[1.43]     | PEM<br>[0.66]        | Iron<br>[3.49]         |
| India             | Neonatal<br>[1.09] | LRI<br>[1.09]        | Diarrhea<br>[1.66]   | Congenital<br>[0.58]  | PEM<br>[1.83]         | STI<br>[1.65]        | Malaria<br>[1481.13] | Meningitis<br>[0.44] | SIDS<br>[0.82]       | TB<br>[1.87]           |
| Andhra Pradesh    | Neonatal<br>[0.82] | LRI<br>[0.5]         | Congenital<br>[0.47] | Diarrhea<br>[0.96]    | STI<br>[1.47]         | Hep<br>[9.7]         | PEM<br>[0.74]        | Meningitis<br>[0.28] | SIDS<br>[0.77]       | Enceph<br>[1.79]       |
| Arunachal Pradesh | Neonatal<br>[0.69] | LRI<br>[0.61]        | Diarrhea<br>[0.85]   | Congenital<br>[0.26]  | Malaria<br>[2380.43]  | STI<br>[1.46]        | Hep<br>[9.2]         | PEM<br>[0.82]        | Whooping<br>[1.28]   | SIDS<br>[0.56]         |
| Assam             | Neonatal<br>[1.3]  | LRI<br>[1.07]        | Congenital<br>[0.88] | Diarrhea<br>[1.55]    | PEM<br>[1.45]         | Malaria<br>[1071.71] | STI<br>[1.36]        | Hep<br>[14.41]       | Whooping<br>[1.31]   | SIDS<br>[0.85]         |
| Bihar             | Neonatal<br>[0.82] | LRI<br>[0.73]        | Diarrhea<br>[1.08]   | Congenital<br>[0.4]   | STI<br>[0.58]         | Meningitis<br>[0.31] | PEM<br>[0.37]        | Enceph<br>[1.85]     | Malaria<br>[14.84]   | Whooping<br>[0.41]     |
| Chhattisgarh      | Neonatal<br>[1.13] | LRI<br>[0.9]         | Diarrhea<br>[0.72]   | Congenital<br>[0.36]  | PEM<br>[1.52]         | STI<br>[1.21]        | Malaria<br>[499.34]  | SIDS<br>[0.68]       | Meningitis<br>[0.19] | TB<br>[1.09]           |
| Delhi             | Neonatal<br>[2.6]  | LRI<br>[3.4]         | Congenital<br>[0.76] | Diarrhea<br>[7.73]    | STI<br>[13.75]        | PEM<br>[18.43]       | Meningitis<br>[1.07] | HIV<br>[7.77]        | Iron<br>[9.58]       | SIDS<br>[0.56]         |
| Goa               | Neonatal<br>[1.82] | LRI<br>[4.15]        | Congenital<br>[0.83] | STI<br>[19.13]        | Diarrhea<br>[4.31]    | SIDS<br>[0.67]       | Enceph<br>[7.3]      | PEM<br>[16.67]       | Falls<br>[6.05]      | Malaria<br>[100686.78] |
| Gujarat           | Neonatal<br>[1.17] | LRI<br>[0.93]        | Congenital<br>[0.61] | Diarrhea<br>[1.08]    | STI<br>[2.49]         | Malaria<br>[5256.81] | PEM<br>[1.87]        | Meningitis<br>[0.48] | SIDS<br>[0.74]       | Whooping<br>[2.0]      |
| Haryana           | Neonatal<br>[1.15] | LRI<br>[1.42]        | Congenital<br>[0.58] | Diarrhea<br>[2.24]    | PEM<br>[4.92]         | STI<br>[3.34]        | Meningitis<br>[0.68] | Malaria<br>[6163.97] | SIDS<br>[0.96]       | TB<br>[3.56]           |
| Himachal Pradesh  | Neonatal<br>[1.33] | LRI<br>[1.61]        | Congenital<br>[0.7]  | Diarrhea<br>[2.03]    | STI<br>[4.99]         | Falls<br>[6.06]      | SIDS<br>[0.74]       | Meningitis<br>[0.43] | Malaria<br>[7156.63] | F Body<br>[0.48]       |
| Jammu & Kashmir   | Neonatal<br>[1.15] | LRI<br>[1.73]        | Congenital<br>[0.83] | Diarrhea<br>[1.17]    | STI<br>[2.17]         | PEM<br>[1.51]        | SIDS<br>[0.85]       | Meningitis<br>[0.37] | Hep<br>[10.68]       | Malaria<br>[2777.33]   |
| Jharkhand         | Neonatal<br>[0.69] | LRI<br>[0.6]         | Diarrhea<br>[0.8]    | Congenital<br>[0.38]  | STI<br>[0.83]         | PEM<br>[0.55]        | Malaria<br>[126.19]  | Meningitis<br>[0.16] | SIDS<br>[0.56]       | TB<br>[0.7]            |
| Karnataka         | Neonatal<br>[0.94] | Congenital<br>[0.68] | LRI<br>[0.57]        | Diarrhea<br>[0.68]    | STI<br>[2.01]         | PEM<br>[1.94]        | Meningitis<br>[0.4]  | SIDS<br>[0.72]       | Enceph<br>[1.89]     | Whooping<br>[1.58]     |
| Kerala            | Neonatal<br>[0.51] | Congenital<br>[0.67] | LRI<br>[0.38]        | STI<br>[5.54]         | SIDS<br>[0.32]        | PEM<br>[1.69]        | Whooping<br>[2.55]   | Vit A<br>[2.28]      | Measles<br>[18.3]    | Enceph<br>[1.12]       |
| Madhya Pradesh    | Neonatal<br>[0.9]  | LRI<br>[0.9]         | Congenital<br>[0.48] | Diarrhea<br>[0.65]    | PEM<br>[1.16]         | Malaria<br>[199.29]  | STI<br>[0.87]        | Meningitis<br>[0.32] | TB<br>[1.21]         | SIDS<br>[0.77]         |
| Maharashtra       | Neonatal<br>[1.1]  | LRI<br>[0.75]        | Congenital<br>[0.41] | Diarrhea<br>[1.09]    | STI<br>[3.62]         | PEM<br>[2.97]        | Meningitis<br>[0.31] | SIDS<br>[0.53]       | Whooping<br>[2.71]   | Enceph<br>[1.56]       |
| Manipur           | Neonatal<br>[0.98] | LRI<br>[0.8]         | Congenital<br>[0.47] | Diarrhea<br>[1.37]    | HIV<br>[10.41]        | STI<br>[2.48]        | Malaria<br>[3293.35] | Whooping<br>[2.45]   | F Body<br>[0.53]     | PEM<br>[1.0]           |
| Meghalaya         | Neonatal<br>[1.02] | LRI<br>[1.24]        | Congenital<br>[0.64] | Malaria<br>[12335.38] | Diarrhea<br>[1.4]     | STI<br>[2.09]        | Meningitis<br>[0.53] | TB<br>[2.87]         | SIDS<br>[0.88]       | PEM<br>[0.92]          |
| Mizoram           | Neonatal<br>[1.38] | LRI<br>[2.46]        | Congenital<br>[0.71] | Malaria<br>[23946.13] | Diarrhea<br>[1.19]    | STI<br>[3.63]        | HIV<br>[12.18]       | Meningitis<br>[0.84] | PEM<br>[2.66]        | Whooping<br>[5.07]     |
| Nagaland          | Neonatal<br>[1.81] | LRI<br>[3.93]        | Congenital<br>[0.49] | Diarrhea<br>[2.52]    | Malaria<br>[45765.89] | HIV<br>[21.87]       | STI<br>[6.47]        | Hep<br>[40.9]        | Meningitis<br>[0.87] | TB<br>[9.69]           |
| Odisha            | Neonatal<br>[1.13] | LRI<br>[0.92]        | Congenital<br>[0.57] | Diarrhea<br>[1.23]    | Malaria<br>[2475.82]  | PEM<br>[1.7]         | STI<br>[1.19]        | Hep<br>[12.28]       | Meningitis<br>[0.33] | F Body<br>[0.66]       |
| Punjab            | Neonatal<br>[1.22] | LRI<br>[1.29]        | Congenital<br>[0.76] | Diarrhea<br>[2.49]    | STI<br>[3.85]         | PEM<br>[3.33]        | Meningitis<br>[0.45] | SIDS<br>[0.71]       | Malaria<br>[3990.56] | Falls<br>[3.95]        |
| Rajasthan         | Neonatal<br>[0.96] | LRI<br>[1.39]        | Congenital<br>[0.45] | Diarrhea<br>[0.68]    | PEM<br>[1.09]         | Malaria<br>[226.58]  | STI<br>[0.83]        | TB<br>[1.78]         | Meningitis<br>[0.3]  | SIDS<br>[0.84]         |
| Sikkim            | Neonatal<br>[0.68] | LRI<br>[1.36]        | Congenital<br>[0.35] | Diarrhea<br>[1.58]    | STI<br>[4.6]          | SIDS<br>[0.66]       | Measles<br>[25.96]   | Enceph<br>[1.69]     | Meningitis<br>[0.27] | Hep<br>[6.52]          |
| Tamil Nadu        | Neonatal<br>[0.58] | Congenital<br>[0.46] | LRI<br>[0.49]        | Diarrhea<br>[0.81]    | STI<br>[3.08]         | PEM<br>[1.77]        | Meningitis<br>[0.31] | SIDS<br>[0.5]        | Falls<br>[3.66]      | Enceph<br>[1.53]       |
| Telangana         | Neonatal<br>[0.85] | LRI<br>[0.48]        | Congenital<br>[0.39] | Diarrhea<br>[1.08]    | STI<br>[2.3]          | HIV<br>[4.57]        | PEM<br>[1.11]        | Meningitis<br>[0.27] | SIDS<br>[0.64]       | Enceph<br>[1.67]       |
| Tripura           | Neonatal<br>[1.2]  | LRI<br>[1.68]        | Congenital<br>[0.86] | Diarrhea<br>[1.15]    | Malaria<br>[3105.23]  | STI<br>[1.76]        | F Body<br>[1.18]     | PEM<br>[1.37]        | Hep<br>[12.66]       | SIDS<br>[1.12]         |
| Uttar Pradesh     | Neonatal<br>[1.17] | LRI<br>[1.11]        | Diarrhea<br>[1.78]   | Congenital<br>[0.78]  | PEM<br>[1.74]         | Meningitis<br>[0.55] | Tetanus<br>[38.9]    | STI<br>[0.96]        | Malaria<br>[224.22]  | TB<br>[1.75]           |

**eFigure 7b. Leading ten causes of DALYs with the ratio of observed DALYs to DALYs expected on the basis of Socio-Demographic Index alone in 2017, <1 years, both sexes combined.** The top ten causes contributing to DALYs are listed globally, by socio-demographic quintile, and then by GBD superregion, region, country, and subnationally where modeled. For each cell, the ratio of observed DALYs to DALYs expected on the basis of socio-demographic index (SDI) alone are listed. Abbreviations: DALY=disability-adjusted life year, GBD=Global Burden of Disease.

Values shown in brackets represent the ratio of observed DALYs to predicted DALYs on the basis of Socio-Demographic Index (SDI), rounded to two (2) digits. Color ranges (shown below) were calculated to place a roughly equal number of cells into each bin.

| COLOR KEY:                             |                    | [0.0-0.33]           | [0.33-0.46]          | [0.46-0.58]          | [0.58-0.7]           | [0.7-0.84]           | [0.84-1.03]          | [1.03-1.38]          | [1.38-2.46]           | 2.46+                |
|----------------------------------------|--------------------|----------------------|----------------------|----------------------|----------------------|----------------------|----------------------|----------------------|-----------------------|----------------------|
|                                        | 1                  | 2                    | 3                    | 4                    | 5                    | 6                    | 7                    | 8                    | 9                     | 10                   |
| Uttarakhand                            | Neonatal<br>[0.96] | LRI<br>[1.31]        | Congenital<br>[0.48] | Diarrhea<br>[1.48]   | STI<br>[3.59]        | PEM<br>[2.61]        | Meningitis<br>[0.5]  | Tetanus<br>[276.41]  | SIDS<br>[0.74]        | TB<br>[2.89]         |
| W Bengal                               | Neonatal<br>[0.84] | LRI<br>[0.8]         | Congenital<br>[0.54] | Diarrhea<br>[0.51]   | STI<br>[1.51]        | PEM<br>[0.98]        | Measles<br>[5.62]    | SIDS<br>[0.73]       | Meningitis<br>[0.24]  | F Body<br>[0.49]     |
| UTs other than Delhi                   | Neonatal<br>[1.77] | LRI<br>[1.81]        | Congenital<br>[0.85] | Diarrhea<br>[2.61]   | STI<br>[8.47]        | Meningitis<br>[0.98] | SIDS<br>[0.93]       | Falls<br>[7.72]      | Malaria<br>[19411.65] | PEM<br>[4.04]        |
| Nepal                                  | Neonatal<br>[0.56] | LRI<br>[0.5]         | Congenital<br>[0.23] | Diarrhea<br>[0.16]   | STI<br>[0.8]         | Whooping<br>[0.57]   | PEM<br>[0.31]        | Tetanus<br>[5.3]     | SIDS<br>[0.6]         | Meningitis<br>[0.13] |
| Pakistan                               | Neonatal<br>[1.6]  | LRI<br>[0.65]        | Diarrhea<br>[0.93]   | Congenital<br>[0.55] | Meningitis<br>[0.82] | STI<br>[1.29]        | Whooping<br>[1.02]   | SIDS<br>[1.0]        | PEM<br>[0.39]         | TB<br>[0.89]         |
| Southeast Asia, East Asia, and Oceania | Neonatal<br>[0.65] | Congenital<br>[0.59] | LRI<br>[1.04]        | Diarrhea<br>[1.84]   | STI<br>[5.01]        | F Body<br>[0.87]     | Meningitis<br>[0.59] | Ileus<br>[1.82]      | PEM<br>[2.31]         | SIDS<br>[0.25]       |
| East Asia                              | Neonatal<br>[0.44] | Congenital<br>[0.49] | LRI<br>[0.87]        | F Body<br>[1.2]      | Diarrhea<br>[0.75]   | STI<br>[1.92]        | Ileus<br>[1.67]      | Meningitis<br>[0.26] | Leukemia<br>[1.9]     | Road Inj<br>[0.9]    |
| China                                  | Neonatal<br>[0.42] | Congenital<br>[0.47] | LRI<br>[0.79]        | F Body<br>[1.15]     | Diarrhea<br>[0.66]   | STI<br>[1.81]        | Ileus<br>[1.59]      | Meningitis<br>[0.24] | Leukemia<br>[1.86]    | Road Inj<br>[0.87]   |
| N Korea                                | Neonatal<br>[0.5]  | LRI<br>[0.63]        | Congenital<br>[0.73] | Diarrhea<br>[0.41]   | F Body<br>[1.41]     | PEM<br>[0.66]        | Ileus<br>[1.27]      | Meningitis<br>[0.19] | Whooping<br>[0.92]    | TB<br>[1.11]         |
| Taiwan                                 | Neonatal<br>[0.72] | Congenital<br>[0.61] | F Body<br>[2.34]     | LRI<br>[1.42]        | SIDS<br>[0.48]       | Diarrhea<br>[2.88]   | Oth Un Inf<br>[1.08] | STI<br>[3.4]         | Endocrine<br>[0.26]   | Falls<br>[1.34]      |
| Oceania                                | Neonatal<br>[0.58] | Congenital<br>[0.73] | LRI<br>[0.37]        | STI<br>[3.74]        | Diarrhea<br>[0.45]   | Meningitis<br>[0.57] | PEM<br>[1.01]        | Whooping<br>[0.99]   | Stroke<br>[2.88]      | F Body<br>[0.55]     |
| Am Samoa                               | Neonatal<br>[0.56] | Congenital<br>[0.3]  | LRI<br>[0.66]        | STI<br>[5.05]        | F Body<br>[0.83]     | Endocrine<br>[0.92]  | Med Treat<br>[2.69]  | PEM<br>[3.95]        | Diarrhea<br>[0.46]    | Meningitis<br>[0.37] |
| Micronesia                             | Neonatal<br>[0.5]  | Congenital<br>[0.4]  | LRI<br>[0.3]         | STI<br>[2.74]        | Whooping<br>[3.25]   | Meningitis<br>[0.21] | Diarrhea<br>[0.1]    | PEM<br>[0.51]        | SIDS<br>[0.37]        | F Body<br>[0.25]     |
| Fiji                                   | Neonatal<br>[0.91] | Congenital<br>[0.82] | LRI<br>[0.84]        | Diarrhea<br>[1.09]   | F Body<br>[0.75]     | Meningitis<br>[0.55] | STI<br>[1.16]        | Oth Un Inf<br>[1.65] | Whooping<br>[2.88]    | PEM<br>[1.48]        |
| Guam                                   | Neonatal<br>[1.48] | Congenital<br>[0.97] | LRI<br>[3.79]        | STI<br>[10.27]       | F Body<br>[0.96]     | Meningitis<br>[1.11] | CMP<br>[2.52]        | SIDS<br>[0.28]       | Diarrhea<br>[1.38]    | PEM<br>[23.55]       |
| Kiribati                               | Neonatal<br>[0.64] | Congenital<br>[0.8]  | LRI<br>[0.17]        | Diarrhea<br>[0.19]   | PEM<br>[0.7]         | Meningitis<br>[0.42] | Whooping<br>[0.88]   | Measles<br>[1.37]    | Med Treat<br>[1.5]    | SIDS<br>[0.43]       |
| Marshall                               | Neonatal<br>[0.56] | Congenital<br>[0.55] | LRI<br>[0.37]        | Whooping<br>[2.82]   | STI<br>[0.66]        | Meningitis<br>[0.24] | Measles<br>[5.07]    | PEM<br>[0.52]        | Diarrhea<br>[0.1]     | F Body<br>[0.32]     |
| N Mariana                              | Neonatal<br>[0.5]  | Congenital<br>[0.26] | LRI<br>[0.62]        | STI<br>[5.55]        | Diarrhea<br>[0.68]   | F Body<br>[0.32]     | SIDS<br>[0.14]       | Measles<br>[42.84]   | PEM<br>[3.67]         | Med Treat<br>[1.01]  |
| PNG                                    | Neonatal<br>[0.53] | Congenital<br>[0.75] | LRI<br>[0.32]        | STI<br>[2.76]        | Diarrhea<br>[0.36]   | Meningitis<br>[0.52] | PEM<br>[0.79]        | Whooping<br>[0.71]   | Stroke<br>[2.92]      | F Body<br>[0.62]     |
| Samoa                                  | Neonatal<br>[0.34] | Congenital<br>[0.26] | LRI<br>[0.2]         | STI<br>[0.99]        | Whooping<br>[2.16]   | Measles<br>[8.68]    | Diarrhea<br>[0.08]   | SIDS<br>[0.3]        | Meningitis<br>[0.12]  | F Body<br>[0.16]     |
| Solomon                                | Neonatal<br>[0.29] | STI<br>[4.96]        | Congenital<br>[0.36] | LRI<br>[0.19]        | Diarrhea<br>[0.07]   | Whooping<br>[0.38]   | PEM<br>[0.16]        | Meningitis<br>[0.09] | Vit A<br>[1.06]       | SIDS<br>[0.23]       |
| Tonga                                  | Neonatal<br>[0.58] | Congenital<br>[0.3]  | LRI<br>[0.37]        | Meningitis<br>[0.9]  | PEM<br>[1.18]        | Whooping<br>[2.23]   | F Body<br>[0.3]      | Measles<br>[13.15]   | SIDS<br>[0.35]        | Dengue<br>[79.4]     |
| Vanuatu                                | Neonatal<br>[0.48] | LRI<br>[0.38]        | Congenital<br>[0.55] | STI<br>[2.78]        | Diarrhea<br>[0.14]   | Whooping<br>[0.94]   | Meningitis<br>[0.18] | PEM<br>[0.33]        | Stroke<br>[1.52]      | F Body<br>[0.33]     |
| Southeast Asia                         | Neonatal<br>[0.85] | Congenital<br>[0.71] | LRI<br>[1.01]        | Diarrhea<br>[2.17]   | STI<br>[6.03]        | Meningitis<br>[0.82] | Ileus<br>[1.87]      | F Body<br>[0.47]     | Dengue<br>[146.03]    | TB<br>[3.99]         |
| Cambodia                               | Neonatal<br>[0.53] | LRI<br>[0.75]        | Congenital<br>[0.71] | Diarrhea<br>[0.17]   | Ileus<br>[1.95]      | Oth Un Inf<br>[1.88] | Meningitis<br>[0.23] | HIV<br>[2.62]        | TB<br>[0.87]          | Malaria<br>[61.6]    |
| Indonesia                              | Neonatal<br>[0.99] | Congenital<br>[0.65] | LRI<br>[0.91]        | Diarrhea<br>[4.25]   | STI<br>[14.23]       | Meningitis<br>[1.17] | Dengue<br>[402.59]   | Measles<br>[63.02]   | Ileus<br>[2.67]       | PEM<br>[3.03]        |
| Laos                                   | Neonatal<br>[1.15] | LRI<br>[1.66]        | Congenital<br>[1.38] | Diarrhea<br>[1.53]   | Meningitis<br>[1.06] | F Body<br>[1.18]     | TB<br>[2.61]         | PEM<br>[0.8]         | Whooping<br>[1.47]    | Road Inj<br>[2.96]   |
| Malaysia                               | Neonatal<br>[0.5]  | Congenital<br>[0.61] | LRI<br>[0.65]        | HIV<br>[8.58]        | F Body<br>[0.68]     | Diarrhea<br>[1.11]   | Meningitis<br>[0.57] | SIDS<br>[0.21]       | PEM<br>[5.83]         | Whooping<br>[5.11]   |
| Maldives                               | Neonatal<br>[0.43] | Congenital<br>[0.27] | LRI<br>[0.08]        | Endocrine<br>[0.89]  | SIDS<br>[0.3]        | Diarrhea<br>[0.17]   | STI<br>[0.63]        | Dengue<br>[73.88]    | PEM<br>[0.77]         | F Body<br>[0.12]     |
| Mauritius                              | Neonatal<br>[1.15] | Congenital<br>[0.76] | LRI<br>[0.64]        | SIDS<br>[0.74]       | Diarrhea<br>[1.41]   | F Body<br>[0.89]     | Meningitis<br>[0.47] | Med Treat<br>[2.87]  | Iron<br>[3.34]        | PEM<br>[3.43]        |
| Myanmar                                | Neonatal<br>[0.97] | Congenital<br>[1.34] | LRI<br>[1.13]        | Diarrhea<br>[0.97]   | Meningitis<br>[0.91] | Oth Un Inf<br>[6.11] | STI<br>[1.58]        | Ileus<br>[2.66]      | F Body<br>[0.79]      | Whooping<br>[2.17]   |

**eFigure 7b. Leading ten causes of DALYs with the ratio of observed DALYs to DALYs expected on the basis of Socio-Demographic Index alone in 2017, <1 years, both sexes combined.** The top ten causes contributing to DALYs are listed globally, by socio-demographic quintile, and then by GBD superregion, region, country, and subnationally where modeled. For each cell, the ratio of observed DALYs to DALYs expected on the basis of socio-demographic index (SDI) alone are listed. Abbreviations: DALY=disability-adjusted life year, GBD=Global Burden of Disease.

Values shown in brackets represent the ratio of observed DALYs to predicted DALYs on the basis of Socio-Demographic Index (SDI), rounded to two (2) digits. Color ranges (shown below) were calculated to place a roughly equal number of cells into each bin.

| COLOR KEY:                 |                    | [0.0-0.33]             | [0.33-0.46]            | [0.46-0.58]          | [0.58-0.7]           | [0.7-0.84]           | [0.84-1.03]           | [1.03-1.38]          | [1.38-2.46]          | 2.46+                |
|----------------------------|--------------------|------------------------|------------------------|----------------------|----------------------|----------------------|-----------------------|----------------------|----------------------|----------------------|
|                            | 1                  | 2                      | 3                      | 4                    | 5                    | 6                    | 7                     | 8                    | 9                    | 10                   |
| Philippines                | Neonatal<br>[0.84] | LRI<br>[0.95]          | Congenital<br>[0.6]    | Diarrhea<br>[1.06]   | STI<br>[2.94]        | Meningitis<br>[0.59] | F Body<br>[0.46]      | SIDS<br>[0.59]       | PEM<br>[1.28]        | TB<br>[2.83]         |
| Sri Lanka                  | Neonatal<br>[0.51] | Congenital<br>[0.39]   | LRI<br>[0.17]          | F Body<br>[0.3]      | SIDS<br>[0.23]       | PEM<br>[1.33]        | Meningitis<br>[0.16]  | Diarrhea<br>[0.15]   | Whooping<br>[1.82]   | CMP<br>[0.64]        |
| Seychelles                 | Neonatal<br>[0.64] | Congenital<br>[0.64]   | LRI<br>[1.08]          | Meningitis<br>[1.02] | SIDS<br>[0.42]       | Diarrhea<br>[0.48]   | Whooping<br>[5.39]    | F Body<br>[0.28]     | Ileus<br>[0.99]      | Endocrine<br>[0.49]  |
| Thailand                   | Neonatal<br>[0.45] | Congenital<br>[0.39]   | LRI<br>[0.34]          | Diarrhea<br>[0.57]   | F Body<br>[0.32]     | SIDS<br>[0.28]       | Whooping<br>[3.84]    | Iron<br>[2.53]       | Oth Un Inf<br>[0.86] | Meningitis<br>[0.18] |
| Timor-Leste                | Neonatal<br>[0.62] | LRI<br>[0.62]          | Congenital<br>[0.79]   | Diarrhea<br>[0.42]   | Meningitis<br>[0.37] | STI<br>[0.73]        | PEM<br>[0.48]         | F Body<br>[0.53]     | HIV<br>[2.56]        | Whooping<br>[0.66]   |
| Vietnam                    | Neonatal<br>[0.31] | Congenital<br>[0.61]   | LRI<br>[0.33]          | Whooping<br>[2.33]   | F Body<br>[0.38]     | Enceph<br>[1.29]     | Meningitis<br>[0.16]  | SIDS<br>[0.31]       | Diarrhea<br>[0.1]    | Drown<br>[1.65]      |
| Sub-Saharan Africa         | Neonatal<br>[0.85] | LRI<br>[0.76]          | Diarrhea<br>[1.05]     | Congenital<br>[0.64] | Malaria<br>[239.46]  | STI<br>[1.89]        | Meningitis<br>[0.88]  | HIV<br>[10.69]       | PEM<br>[1.14]        | Whooping<br>[1.16]   |
| Central Sub-Saharan Africa | Neonatal<br>[0.84] | LRI<br>[0.78]          | Congenital<br>[0.96]   | Malaria<br>[559.64]  | Diarrhea<br>[1.06]   | STI<br>[2.91]        | PEM<br>[1.54]         | Meningitis<br>[0.69] | Whooping<br>[1.83]   | TB<br>[1.88]         |
| Angola                     | Neonatal<br>[0.78] | Diarrhea<br>[1.28]     | LRI<br>[0.55]          | Congenital<br>[0.7]  | STI<br>[2.88]        | Malaria<br>[226.92]  | PEM<br>[1.54]         | Meningitis<br>[0.65] | HIV<br>[8.42]        | Measles<br>[2.28]    |
| C African Rep              | Neonatal<br>[1.14] | Diarrhea<br>[1.84]     | LRI<br>[1.08]          | Congenital<br>[1.35] | Malaria<br>[17.14]   | STI<br>[2.34]        | PEM<br>[1.63]         | Meningitis<br>[0.99] | Whooping<br>[2.04]   | TB<br>[2.28]         |
| Congo                      | Neonatal<br>[0.93] | Congenital<br>[0.64]   | HIV<br>[49.91]         | Diarrhea<br>[2.26]   | LRI<br>[0.57]        | STI<br>[9.18]        | Malaria<br>[13959.58] | Meningitis<br>[0.64] | PEM<br>[1.87]        | Whooping<br>[2.82]   |
| Congo DR                   | Neonatal<br>[0.64] | LRI<br>[0.59]          | Malaria<br>[32.78]     | Congenital<br>[0.96] | Diarrhea<br>[0.49]   | STI<br>[1.53]        | PEM<br>[0.79]         | Whooping<br>[1.16]   | Meningitis<br>[0.47] | TB<br>[1.12]         |
| Eq Guinea                  | Neonatal<br>[1.09] | Malaria<br>[145294.81] | Congenital<br>[0.8]    | STI<br>[16.58]       | LRI<br>[0.79]        | HIV<br>[50.51]       | Diarrhea<br>[2.39]    | Meningitis<br>[1.01] | PEM<br>[3.37]        | Measles<br>[34.96]   |
| Gabon                      | Neonatal<br>[1.6]  | Congenital<br>[1.02]   | Malaria<br>[189880.94] | LRI<br>[1.19]        | Diarrhea<br>[3.53]   | STI<br>[13.95]       | Meningitis<br>[1.31]  | HIV<br>[12.61]       | PEM<br>[5.36]        | SIDS<br>[0.8]        |
| Eastern Sub-Saharan Africa | Neonatal<br>[0.64] | LRI<br>[0.44]          | Diarrhea<br>[0.57]     | Congenital<br>[0.64] | STI<br>[1.38]        | Malaria<br>[15.11]   | HIV<br>[12.31]        | PEM<br>[0.73]        | Meningitis<br>[0.45] | Whooping<br>[0.79]   |
| Burundi                    | Neonatal<br>[0.53] | LRI<br>[0.39]          | Congenital<br>[0.95]   | Malaria<br>[7.95]    | Diarrhea<br>[0.34]   | PEM<br>[0.82]        | Meningitis<br>[0.35]  | Measles<br>[0.34]    | TB<br>[0.69]         | Oth Un Inf<br>[1.23] |
| Comoros                    | Neonatal<br>[0.67] | LRI<br>[0.42]          | Congenital<br>[0.71]   | Diarrhea<br>[0.48]   | STI<br>[1.2]         | PEM<br>[0.6]         | Meningitis<br>[0.36]  | Whooping<br>[0.82]   | Oth Un Inf<br>[1.52] | SIDS<br>[0.72]       |
| Djibouti                   | Neonatal<br>[0.5]  | LRI<br>[0.4]           | Congenital<br>[0.51]   | Diarrhea<br>[0.51]   | STI<br>[2.29]        | PEM<br>[0.92]        | Whooping<br>[1.52]    | Meningitis<br>[0.37] | HIV<br>[4.39]        | Oth Un Inf<br>[1.95] |
| Eritrea                    | Neonatal<br>[0.67] | LRI<br>[0.55]          | Diarrhea<br>[0.73]     | Congenital<br>[0.66] | STI<br>[1.11]        | PEM<br>[0.91]        | Meningitis<br>[0.49]  | HIV<br>[5.44]        | Oth Un Inf<br>[2.48] | TB<br>[1.09]         |
| Ethiopia                   | Neonatal<br>[0.58] | Diarrhea<br>[0.53]     | LRI<br>[0.31]          | Congenital<br>[0.38] | STI<br>[0.79]        | PEM<br>[0.52]        | Whooping<br>[0.79]    | Meningitis<br>[0.35] | Oth Un Inf<br>[1.71] | SIDS<br>[0.68]       |
| Kenya                      | Neonatal<br>[0.65] | LRI<br>[0.69]          | Diarrhea<br>[1.5]      | Congenital<br>[0.6]  | HIV<br>[19.23]       | Meningitis<br>[0.63] | PEM<br>[1.09]         | STI<br>[1.09]        | Tetanus<br>[44.09]   | Malaria<br>[302.41]  |
| Baringo                    | Neonatal<br>[0.52] | LRI<br>[0.5]           | Diarrhea<br>[1.01]     | Congenital<br>[0.5]  | Meningitis<br>[0.27] | PEM<br>[0.62]        | STI<br>[0.62]         | Oth Un Inf<br>[1.48] | HIV<br>[2.46]        | Whooping<br>[0.42]   |
| Bomet                      | Neonatal<br>[0.46] | HIV<br>[42.44]         | Diarrhea<br>[0.71]     | LRI<br>[0.25]        | Congenital<br>[0.27] | STI<br>[0.72]        | Meningitis<br>[0.2]   | PEM<br>[0.23]        | Oth Un Inf<br>[0.9]  | iNTS<br>[8.97]       |
| Bungoma                    | Neonatal<br>[0.67] | Diarrhea<br>[1.51]     | LRI<br>[0.61]          | Congenital<br>[0.62] | Malaria<br>[155.04]  | Meningitis<br>[0.56] | PEM<br>[0.86]         | STI<br>[0.88]        | Whooping<br>[1.32]   | Tetanus<br>[17.92]   |
| Busia                      | Neonatal<br>[0.71] | LRI<br>[0.97]          | Diarrhea<br>[1.33]     | Congenital<br>[0.93] | Malaria<br>[299.38]  | Meningitis<br>[0.79] | PEM<br>[1.05]         | Whooping<br>[0.95]   | Tetanus<br>[12.88]   | STI<br>[0.55]        |
| Elgeyo-Marakwet            | Neonatal<br>[0.95] | Diarrhea<br>[1.97]     | LRI<br>[0.63]          | Congenital<br>[0.65] | STI<br>[1.65]        | Meningitis<br>[0.52] | HIV<br>[7.66]         | PEM<br>[1.0]         | Whooping<br>[1.09]   | Oth Un Inf<br>[2.24] |
| Embu                       | Neonatal<br>[0.8]  | LRI<br>[1.02]          | Diarrhea<br>[2.86]     | Congenital<br>[0.78] | PEM<br>[2.51]        | Meningitis<br>[0.97] | HIV<br>[13.67]        | STI<br>[1.7]         | SIDS<br>[1.08]       | Whooping<br>[1.59]   |
| Garissa                    | Neonatal<br>[0.23] | Diarrhea<br>[0.39]     | LRI<br>[0.2]           | Congenital<br>[0.24] | HIV<br>[9.84]        | Tetanus<br>[2.47]    | STI<br>[0.24]         | Meningitis<br>[0.15] | SIDS<br>[0.58]       | PEM<br>[0.15]        |
| HomaBay                    | Neonatal<br>[0.65] | LRI<br>[1.06]          | HIV<br>[59.54]         | Diarrhea<br>[1.23]   | Congenital<br>[1.03] | Meningitis<br>[0.89] | Malaria<br>[55.12]    | PEM<br>[1.16]        | TB<br>[1.83]         | STI<br>[0.62]        |
| Isiolo                     | Neonatal<br>[0.65] | LRI<br>[0.98]          | Congenital<br>[1.01]   | Diarrhea<br>[0.54]   | Meningitis<br>[0.76] | PEM<br>[1.0]         | Tetanus<br>[9.31]     | HIV<br>[8.49]        | Whooping<br>[0.91]   | TB<br>[1.31]         |
| Kajiado                    | Neonatal<br>[0.52] | LRI<br>[0.39]          | Diarrhea<br>[0.92]     | Congenital<br>[0.34] | STI<br>[1.11]        | Meningitis<br>[0.4]  | Whooping<br>[1.87]    | Tetanus<br>[49.45]   | HIV<br>[3.15]        | PEM<br>[0.54]        |

**eFigure 7b. Leading ten causes of DALYs with the ratio of observed DALYs to DALYs expected on the basis of Socio-Demographic Index alone in 2017, <1 years, both sexes combined.** The top ten causes contributing to DALYs are listed globally, by socio-demographic quintile, and then by GBD superregion, region, country, and subnationally where modeled. For each cell, the ratio of observed DALYs to DALYs expected on the basis of socio-demographic index (SDI) alone are listed. Abbreviations: DALY=disability-adjusted life year, GBD=Global Burden of Disease.

Values shown in brackets represent the ratio of observed DALYs to predicted DALYs on the basis of Socio-Demographic Index (SDI), rounded to two (2) digits. Color ranges (shown below) were calculated to place a roughly equal number of cells into each bin.

| COLOR KEY:   |                    | [0.0-0.33]         | [0.33-0.46]          | [0.46-0.58]          | [0.58-0.7]           | [0.7-0.84]           | [0.84-1.03]          | [1.03-1.38]          | [1.38-2.46]          | 2.46+                |
|--------------|--------------------|--------------------|----------------------|----------------------|----------------------|----------------------|----------------------|----------------------|----------------------|----------------------|
|              | 1                  | 2                  | 3                    | 4                    | 5                    | 6                    | 7                    | 8                    | 9                    | 10                   |
| Kakamega     | Neonatal<br>[0.62] | LRI<br>[0.75]      | Diarrhea<br>[1.28]   | Congenital<br>[0.71] | Meningitis<br>[0.66] | Malaria<br>[94.42]   | PEM<br>[0.99]        | HIV<br>[8.34]        | STI<br>[0.67]        | Whooping<br>[0.84]   |
| Kericho      | Neonatal<br>[0.83] | Diarrhea<br>[1.27] | LRI<br>[0.51]        | Congenital<br>[0.56] | HIV<br>[18.7]        | STI<br>[1.27]        | Meningitis<br>[0.43] | Whooping<br>[1.04]   | PEM<br>[0.58]        | iNTS<br>[21.0]       |
| Kiambu       | Neonatal<br>[1.36] | LRI<br>[1.32]      | Congenital<br>[0.95] | Diarrhea<br>[3.04]   | Meningitis<br>[1.33] | STI<br>[3.89]        | PEM<br>[2.84]        | HIV<br>[9.65]        | Whooping<br>[4.89]   | SIDS<br>[1.28]       |
| Kilifi       | Neonatal<br>[0.62] | Diarrhea<br>[1.57] | LRI<br>[0.58]        | Congenital<br>[0.58] | HIV<br>[12.88]       | PEM<br>[1.03]        | Meningitis<br>[0.49] | Tetanus<br>[16.98]   | STI<br>[0.68]        | Malaria<br>[57.29]   |
| Kirinyaga    | Neonatal<br>[0.98] | LRI<br>[0.96]      | Diarrhea<br>[2.71]   | Congenital<br>[0.9]  | Meningitis<br>[0.9]  | STI<br>[1.72]        | PEM<br>[1.35]        | HIV<br>[7.2]         | SIDS<br>[0.84]       | Malaria<br>[574.43]  |
| Kisii        | Neonatal<br>[1.05] | Diarrhea<br>[3.01] | LRI<br>[0.99]        | Congenital<br>[0.95] | Meningitis<br>[0.82] | STI<br>[1.8]         | PEM<br>[1.13]        | HIV<br>[6.51]        | iNTS<br>[23.95]      | Oth Un Inf<br>[1.86] |
| Kisumu       | Neonatal<br>[0.88] | LRI<br>[1.01]      | Congenital<br>[1.11] | HIV<br>[56.76]       | Diarrhea<br>[1.34]   | Meningitis<br>[1.34] | Malaria<br>[1157.03] | STI<br>[2.08]        | Whooping<br>[2.23]   | PEM<br>[1.1]         |
| Kitui        | Neonatal<br>[0.5]  | Diarrhea<br>[0.88] | LRI<br>[0.29]        | Congenital<br>[0.34] | HIV<br>[13.96]       | STI<br>[0.61]        | Whooping<br>[0.84]   | Meningitis<br>[0.26] | Tetanus<br>[12.86]   | PEM<br>[0.36]        |
| Kwale        | Neonatal<br>[0.59] | LRI<br>[0.42]      | Diarrhea<br>[0.73]   | Congenital<br>[0.46] | HIV<br>[11.31]       | Malaria<br>[92.69]   | Meningitis<br>[0.34] | PEM<br>[0.55]        | Tetanus<br>[14.45]   | STI<br>[0.51]        |
| Laikipia     | Neonatal<br>[0.61] | HIV<br>[37.88]     | LRI<br>[0.35]        | Diarrhea<br>[1.1]    | Congenital<br>[0.33] | STI<br>[1.56]        | Meningitis<br>[0.33] | Oth Un Inf<br>[1.57] | Tetanus<br>[45.63]   | Whooping<br>[0.9]    |
| Lamu         | Neonatal<br>[1.2]  | LRI<br>[1.15]      | Congenital<br>[1.34] | Diarrhea<br>[1.34]   | Meningitis<br>[1.13] | PEM<br>[1.83]        | Tetanus<br>[35.77]   | Whooping<br>[1.96]   | HIV<br>[7.86]        | STI<br>[0.96]        |
| Machakos     | Neonatal<br>[1.28] | Diarrhea<br>[2.85] | LRI<br>[0.88]        | Congenital<br>[0.87] | HIV<br>[51.62]       | STI<br>[2.07]        | Meningitis<br>[0.82] | PEM<br>[1.23]        | Whooping<br>[1.58]   | Oth Un Inf<br>[2.61] |
| Makueni      | Neonatal<br>[0.19] | HIV<br>[28.35]     | Diarrhea<br>[0.38]   | LRI<br>[0.12]        | Congenital<br>[0.13] | STI<br>[0.28]        | Meningitis<br>[0.1]  | Whooping<br>[0.31]   | PEM<br>[0.14]        | iNTS<br>[5.33]       |
| Mandera      | Neonatal<br>[0.15] | Diarrhea<br>[0.27] | LRI<br>[0.16]        | Tetanus<br>[1.79]    | Congenital<br>[0.13] | HIV<br>[4.4]         | PEM<br>[0.17]        | Meningitis<br>[0.12] | STI<br>[0.15]        | Whooping<br>[0.18]   |
| Marsabit     | Neonatal<br>[0.52] | LRI<br>[0.44]      | Diarrhea<br>[0.66]   | HIV<br>[24.65]       | Congenital<br>[0.49] | Tetanus<br>[6.34]    | PEM<br>[0.53]        | Meningitis<br>[0.32] | STI<br>[0.39]        | Whooping<br>[0.35]   |
| Meru         | Neonatal<br>[0.97] | LRI<br>[1.13]      | Diarrhea<br>[2.6]    | Congenital<br>[0.93] | HIV<br>[35.76]       | Meningitis<br>[1.05] | PEM<br>[1.99]        | STI<br>[1.48]        | Whooping<br>[1.53]   | Malaria<br>[391.0]   |
| Migori       | Neonatal<br>[0.76] | LRI<br>[1.05]      | Diarrhea<br>[1.39]   | Congenital<br>[1.09] | HIV<br>[52.0]        | Meningitis<br>[0.82] | Malaria<br>[42.08]   | PEM<br>[0.95]        | STI<br>[0.66]        | Tetanus<br>[9.23]    |
| Mombasa      | Neonatal<br>[1.04] | LRI<br>[1.32]      | Diarrhea<br>[3.45]   | Congenital<br>[0.93] | Meningitis<br>[1.43] | PEM<br>[3.36]        | STI<br>[2.99]        | HIV<br>[10.25]       | Whooping<br>[4.07]   | SIDS<br>[1.41]       |
| Murang'a     | Neonatal<br>[0.8]  | LRI<br>[0.97]      | Congenital<br>[1.03] | HIV<br>[24.49]       | Meningitis<br>[1.27] | Diarrhea<br>[0.49]   | Whooping<br>[3.92]   | STI<br>[1.89]        | PEM<br>[1.29]        | SIDS<br>[1.3]        |
| Nairobi      | Neonatal<br>[1.13] | LRI<br>[1.54]      | Congenital<br>[0.63] | Diarrhea<br>[3.61]   | STI<br>[12.16]       | Meningitis<br>[1.48] | HIV<br>[9.71]        | PEM<br>[7.13]        | SIDS<br>[0.77]       | Oth Un Inf<br>[3.05] |
| Nakuru       | Neonatal<br>[0.77] | LRI<br>[1.07]      | Congenital<br>[0.86] | Diarrhea<br>[2.11]   | Meningitis<br>[1.04] | PEM<br>[2.7]         | STI<br>[1.48]        | HIV<br>[6.21]        | TB<br>[2.16]         | SIDS<br>[0.88]       |
| Nandi        | Neonatal<br>[0.6]  | Diarrhea<br>[1.18] | LRI<br>[0.41]        | Congenital<br>[0.42] | HIV<br>[18.54]       | STI<br>[1.05]        | Meningitis<br>[0.35] | PEM<br>[0.52]        | iNTS<br>[18.2]       | Malaria<br>[140.86]  |
| Narok        | Neonatal<br>[0.17] | LRI<br>[0.16]      | Diarrhea<br>[0.26]   | Congenital<br>[0.17] | Meningitis<br>[0.13] | STI<br>[0.22]        | PEM<br>[0.19]        | Tetanus<br>[1.98]    | Whooping<br>[0.22]   | HIV<br>[1.21]        |
| Nyamira      | Neonatal<br>[0.86] | LRI<br>[0.59]      | Congenital<br>[0.6]  | Diarrhea<br>[1.43]   | HIV<br>[19.45]       | STI<br>[1.95]        | Meningitis<br>[0.53] | iNTS<br>[21.89]      | Oth Un Inf<br>[1.5]  | Tetanus<br>[42.65]   |
| Nyandarua    | Neonatal<br>[1.04] | LRI<br>[1.35]      | Congenital<br>[1.06] | Diarrhea<br>[2.49]   | Meningitis<br>[1.34] | PEM<br>[2.43]        | Whooping<br>[3.38]   | HIV<br>[9.51]        | STI<br>[1.59]        | TB<br>[2.9]          |
| Nyeri        | Neonatal<br>[0.93] | LRI<br>[1.56]      | Congenital<br>[1.08] | Diarrhea<br>[2.28]   | Meningitis<br>[1.85] | PEM<br>[3.92]        | HIV<br>[17.13]       | Whooping<br>[5.67]   | STI<br>[2.45]        | TB<br>[4.04]         |
| Samburu      | Neonatal<br>[0.33] | HIV<br>[35.32]     | Diarrhea<br>[0.37]   | LRI<br>[0.24]        | Congenital<br>[0.25] | Tetanus<br>[3.02]    | PEM<br>[0.26]        | STI<br>[0.27]        | Meningitis<br>[0.16] | Whooping<br>[0.35]   |
| Siaya        | Neonatal<br>[0.64] | LRI<br>[0.84]      | Diarrhea<br>[1.21]   | Congenital<br>[0.9]  | Malaria<br>[387.98]  | HIV<br>[18.22]       | Meningitis<br>[0.66] | PEM<br>[0.64]        | STI<br>[0.63]        | TB<br>[1.05]         |
| TaitaTaveta  | Neonatal<br>[0.68] | LRI<br>[0.8]       | Diarrhea<br>[1.76]   | Congenital<br>[0.65] | HIV<br>[31.94]       | Meningitis<br>[0.89] | STI<br>[1.86]        | PEM<br>[1.76]        | Whooping<br>[2.31]   | SIDS<br>[1.28]       |
| TanaRiver    | Neonatal<br>[0.82] | LRI<br>[0.55]      | Diarrhea<br>[0.58]   | HIV<br>[30.6]        | Congenital<br>[0.66] | Tetanus<br>[13.67]   | PEM<br>[0.62]        | Meningitis<br>[0.41] | STI<br>[0.49]        | Whooping<br>[0.71]   |
| TharakaNithi | Neonatal<br>[1.22] | Diarrhea<br>[6.36] | LRI<br>[1.72]        | Congenital<br>[1.25] | PEM<br>[5.78]        | Meningitis<br>[1.61] | STI<br>[2.46]        | TB<br>[3.73]         | SIDS<br>[1.76]       | Whooping<br>[2.28]   |

**eFigure 7b. Leading ten causes of DALYs with the ratio of observed DALYs to DALYs expected on the basis of Socio-Demographic Index alone in 2017, <1 years, both sexes combined.** The top ten causes contributing to DALYs are listed globally, by socio-demographic quintile, and then by GBD superregion, region, country, and subnationally where modeled. For each cell, the ratio of observed DALYs to DALYs expected on the basis of socio-demographic index (SDI) alone are listed. Abbreviations: DALY=disability-adjusted life year, GBD=Global Burden of Disease.

Values shown in brackets represent the ratio of observed DALYs to predicted DALYs on the basis of Socio-Demographic Index (SDI), rounded to two (2) digits. Color ranges (shown below) were calculated to place a roughly equal number of cells into each bin.

| COLOR KEY:                         |                    | [0.0-0.33]           | [0.33-0.46]          | [0.46-0.58]          | [0.58-0.7]           | [0.7-0.84]           | [0.84-1.03]          | [1.03-1.38]          | [1.38-2.46]          | 2.46+                |
|------------------------------------|--------------------|----------------------|----------------------|----------------------|----------------------|----------------------|----------------------|----------------------|----------------------|----------------------|
|                                    | 1                  | 2                    | 3                    | 4                    | 5                    | 6                    | 7                    | 8                    | 9                    | 10                   |
| TransNzoia                         | Neonatal<br>[0.44] | Diarrhea<br>[1.18]   | LRI<br>[0.38]        | HIV<br>[28.1]        | Congenital<br>[0.32] | STI<br>[1.01]        | Meningitis<br>[0.35] | Whooping<br>[1.01]   | Tetanus<br>[24.74]   | PEM<br>[0.49]        |
| Turkana                            | Neonatal<br>[0.32] | Diarrhea<br>[0.44]   | LRI<br>[0.28]        | HIV<br>[15.78]       | Congenital<br>[0.35] | Tetanus<br>[2.97]    | PEM<br>[0.35]        | Meningitis<br>[0.21] | Malaria<br>[0.47]    | STI<br>[0.18]        |
| UasinGishu                         | Neonatal<br>[0.66] | Diarrhea<br>[2.45]   | LRI<br>[0.66]        | Congenital<br>[0.53] | Meningitis<br>[0.63] | PEM<br>[1.56]        | STI<br>[1.52]        | HIV<br>[6.97]        | Whooping<br>[1.4]    | Oth Un Inf<br>[1.78] |
| Vihiga                             | Neonatal<br>[0.33] | LRI<br>[0.34]        | Diarrhea<br>[0.64]   | Congenital<br>[0.38] | Malaria<br>[141.88]  | Meningitis<br>[0.31] | PEM<br>[0.35]        | STI<br>[0.31]        | Whooping<br>[0.37]   | Tetanus<br>[7.08]    |
| Wajir                              | Neonatal<br>[0.29] | Diarrhea<br>[0.53]   | LRI<br>[0.29]        | Congenital<br>[0.36] | Tetanus<br>[1.86]    | PEM<br>[0.26]        | Meningitis<br>[0.22] | Whooping<br>[0.44]   | Measles<br>[0.18]    | SIDS<br>[0.7]        |
| WestPokot                          | Neonatal<br>[0.42] | Diarrhea<br>[0.92]   | LRI<br>[0.35]        | Congenital<br>[0.34] | Tetanus<br>[7.55]    | HIV<br>[6.03]        | PEM<br>[0.47]        | STI<br>[0.48]        | Meningitis<br>[0.25] | Whooping<br>[0.53]   |
| Madagascar                         | Neonatal<br>[0.56] | LRI<br>[0.56]        | Diarrhea<br>[0.85]   | Congenital<br>[0.59] | PEM<br>[1.31]        | STI<br>[1.4]         | Malaria<br>[2.5]     | Meningitis<br>[0.34] | Oth Un Inf<br>[1.68] | Whooping<br>[0.47]   |
| Malawi                             | Neonatal<br>[0.6]  | LRI<br>[0.31]        | Congenital<br>[0.68] | HIV<br>[27.08]       | STI<br>[1.35]        | Diarrhea<br>[0.25]   | Malaria<br>[6.83]    | Meningitis<br>[0.36] | PEM<br>[0.34]        | Whooping<br>[0.55]   |
| Mozambique                         | Neonatal<br>[0.62] | HIV<br>[62.22]       | Congenital<br>[0.81] | Malaria<br>[11.55]   | LRI<br>[0.28]        | Diarrhea<br>[0.27]   | STI<br>[1.32]        | Meningitis<br>[0.31] | SIDS<br>[0.98]       | TB<br>[0.59]         |
| Rwanda                             | Neonatal<br>[0.54] | LRI<br>[0.38]        | Congenital<br>[0.71] | Diarrhea<br>[0.41]   | Malaria<br>[20.25]   | PEM<br>[0.73]        | Meningitis<br>[0.43] | STI<br>[0.35]        | SIDS<br>[0.8]        | HIV<br>[2.78]        |
| Somalia                            | Neonatal<br>[0.44] | LRI<br>[0.38]        | Diarrhea<br>[0.35]   | Whooping<br>[1.85]   | STI<br>[1.07]        | Congenital<br>[0.37] | Measles<br>[0.5]     | PEM<br>[0.45]        | Meningitis<br>[0.4]  | Tetanus<br>[0.75]    |
| S Sudan                            | Neonatal<br>[0.7]  | LRI<br>[0.81]        | Diarrhea<br>[0.83]   | STI<br>[1.6]         | Congenital<br>[0.5]  | Malaria<br>[2.16]    | Meningitis<br>[0.77] | PEM<br>[0.82]        | TB<br>[0.9]          | Measles<br>[0.33]    |
| Tanzania                           | Neonatal<br>[0.68] | Congenital<br>[1.07] | LRI<br>[0.5]         | STI<br>[1.71]        | Malaria<br>[39.88]   | Diarrhea<br>[0.23]   | PEM<br>[0.7]         | Meningitis<br>[0.4]  | SIDS<br>[1.16]       | Whooping<br>[0.63]   |
| Uganda                             | Neonatal<br>[0.64] | Malaria<br>[44.07]   | Congenital<br>[0.64] | LRI<br>[0.24]        | STI<br>[2.2]         | Diarrhea<br>[0.29]   | HIV<br>[12.48]       | Meningitis<br>[0.52] | PEM<br>[0.47]        | Whooping<br>[0.6]    |
| Zambia                             | Neonatal<br>[0.73] | LRI<br>[0.55]        | HIV<br>[46.93]       | Congenital<br>[0.75] | Diarrhea<br>[0.8]    | Malaria<br>[296.89]  | STI<br>[1.79]        | PEM<br>[1.16]        | Meningitis<br>[0.61] | TB<br>[1.12]         |
| <b>Southern Sub-Saharan Africa</b> | Neonatal<br>[1.21] | LRI<br>[1.77]        | Diarrhea<br>[5.47]   | HIV<br>[48.92]       | Congenital<br>[0.35] | STI<br>[7.59]        | PEM<br>[9.34]        | TB<br>[11.71]        | Meningitis<br>[0.75] | Whooping<br>[5.96]   |
| Botswana                           | Neonatal<br>[1.01] | Diarrhea<br>[5.49]   | LRI<br>[0.74]        | Congenital<br>[0.19] | HIV<br>[15.94]       | STI<br>[2.75]        | PEM<br>[3.84]        | Oth Un Inf<br>[2.06] | SIDS<br>[0.33]       | TB<br>[3.9]          |
| Lesotho                            | Neonatal<br>[0.93] | LRI<br>[0.81]        | Diarrhea<br>[1.84]   | HIV<br>[61.23]       | Congenital<br>[0.37] | STI<br>[1.78]        | PEM<br>[1.4]         | TB<br>[2.62]         | Meningitis<br>[0.28] | Oth Un Inf<br>[1.27] |
| Namibia                            | Neonatal<br>[1.2]  | HIV<br>[90.73]       | LRI<br>[0.98]        | Diarrhea<br>[3.97]   | Congenital<br>[0.29] | PEM<br>[3.55]        | STI<br>[1.94]        | TB<br>[5.24]         | Oth Un Inf<br>[2.51] | Meningitis<br>[0.38] |
| S Africa                           | Neonatal<br>[1.17] | LRI<br>[1.62]        | Diarrhea<br>[8.49]   | HIV<br>[64.42]       | Congenital<br>[0.36] | STI<br>[14.31]       | PEM<br>[11.12]       | TB<br>[12.8]         | SIDS<br>[0.78]       | Oth Un Inf<br>[3.41] |
| Swaziland                          | Neonatal<br>[0.86] | LRI<br>[1.29]        | Diarrhea<br>[4.45]   | HIV<br>[58.05]       | Congenital<br>[0.33] | PEM<br>[4.39]        | STI<br>[3.04]        | TB<br>[6.58]         | Meningitis<br>[0.54] | SIDS<br>[0.75]       |
| Zimbabwe                           | Neonatal<br>[0.83] | LRI<br>[1.0]         | Diarrhea<br>[0.66]   | Congenital<br>[0.33] | PEM<br>[1.84]        | HIV<br>[11.79]       | TB<br>[2.74]         | Meningitis<br>[0.46] | STI<br>[0.75]        | Whooping<br>[0.8]    |
| <b>Western Sub-Saharan Africa</b>  | Neonatal<br>[0.95] | LRI<br>[0.94]        | Diarrhea<br>[1.22]   | Malaria<br>[271.09]  | Congenital<br>[0.57] | Meningitis<br>[1.22] | STI<br>[1.52]        | PEM<br>[1.07]        | HIV<br>[7.27]        | Whooping<br>[1.01]   |
| Benin                              | Neonatal<br>[0.81] | LRI<br>[0.46]        | Malaria<br>[33.56]   | Diarrhea<br>[0.57]   | Congenital<br>[0.64] | Meningitis<br>[0.58] | PEM<br>[0.58]        | Whooping<br>[0.73]   | STI<br>[0.49]        | SIDS<br>[0.88]       |
| Burkina Faso                       | Neonatal<br>[0.49] | LRI<br>[0.48]        | Malaria<br>[7.51]    | Congenital<br>[0.83] | Diarrhea<br>[0.38]   | Meningitis<br>[0.72] | PEM<br>[0.54]        | iNTS<br>[9.03]       | SIDS<br>[0.94]       | TB<br>[0.51]         |
| Cameroon                           | Neonatal<br>[0.75] | Diarrhea<br>[1.36]   | LRI<br>[0.57]        | Malaria<br>[1324.5]  | Congenital<br>[0.52] | STI<br>[2.58]        | Meningitis<br>[0.66] | HIV<br>[7.84]        | PEM<br>[0.94]        | Whooping<br>[0.86]   |
| Cape Verde                         | Neonatal<br>[0.77] | Congenital<br>[0.44] | LRI<br>[0.25]        | Diarrhea<br>[0.25]   | SIDS<br>[0.98]       | STI<br>[0.9]         | Meningitis<br>[0.23] | F Body<br>[0.45]     | HIV<br>[2.97]        | PEM<br>[0.39]        |
| Chad                               | Neonatal<br>[0.61] | Diarrhea<br>[0.81]   | LRI<br>[0.59]        | Congenital<br>[0.45] | Malaria<br>[1.28]    | Meningitis<br>[0.64] | PEM<br>[0.54]        | Whooping<br>[0.57]   | STI<br>[0.32]        | TB<br>[0.61]         |
| Cote d'Ivoire                      | Neonatal<br>[0.91] | LRI<br>[0.6]         | Diarrhea<br>[0.77]   | Congenital<br>[0.78] | Malaria<br>[81.23]   | HIV<br>[10.39]       | Meningitis<br>[0.6]  | STI<br>[0.99]        | PEM<br>[0.74]        | SIDS<br>[1.09]       |
| Gambia                             | Neonatal<br>[0.68] | LRI<br>[0.31]        | Congenital<br>[0.41] | Diarrhea<br>[0.3]    | STI<br>[1.58]        | Meningitis<br>[0.4]  | PEM<br>[0.42]        | Whooping<br>[0.65]   | HIV<br>[3.84]        | Hemog<br>[5.62]      |
| Ghana                              | Neonatal<br>[1.16] | Congenital<br>[0.59] | LRI<br>[0.46]        | Malaria<br>[5267.9]  | Diarrhea<br>[1.15]   | STI<br>[3.04]        | Meningitis<br>[0.76] | PEM<br>[1.48]        | HIV<br>[7.3]         | SIDS<br>[0.82]       |

**eFigure 7b. Leading ten causes of DALYs with the ratio of observed DALYs to DALYs expected on the basis of Socio-Demographic Index alone in 2017, <1 years, both sexes combined.** The top ten causes contributing to DALYs are listed globally, by socio-demographic quintile, and then by GBD superregion, region, country, and subnationally where modeled. For each cell, the ratio of observed DALYs to DALYs expected on the basis of socio-demographic index (SDI) alone are listed. Abbreviations: DALY=disability-adjusted life year, GBD=Global Burden of Disease.

Values shown in brackets represent the ratio of observed DALYs to predicted DALYs on the basis of Socio-Demographic Index (SDI), rounded to two (2) digits. Color ranges (shown below) were calculated to place a roughly equal number of cells into each bin.

| COLOR KEY:        |                    | [0.0-0.33]           | [0.33-0.46]        | [0.46-0.58]          | [0.58-0.7]           | [0.7-0.84]           | [0.84-1.03]          | [1.03-1.38]        | [1.38-2.46]        | 2.46+              |
|-------------------|--------------------|----------------------|--------------------|----------------------|----------------------|----------------------|----------------------|--------------------|--------------------|--------------------|
|                   | 1                  | 2                    | 3                  | 4                    | 5                    | 6                    | 7                    | 8                  | 9                  | 10                 |
| Guinea            | Neonatal<br>[0.7]  | LRI<br>[0.6]         | Malaria<br>[10.64] | Congenital<br>[0.67] | Diarrhea<br>[0.32]   | Meningitis<br>[0.65] | PEM<br>[0.67]        | STI<br>[0.75]      | Whooping<br>[0.98] | SIDS<br>[0.93]     |
| Guinea-Bissau     | Neonatal<br>[0.79] | Diarrhea<br>[0.59]   | LRI<br>[0.28]      | Congenital<br>[0.6]  | STI<br>[1.89]        | Measles<br>[1.09]    | Meningitis<br>[0.45] | Whooping<br>[0.72] | PEM<br>[0.4]       | HIV<br>[5.09]      |
| Liberia           | Neonatal<br>[0.49] | STI<br>[2.47]        | LRI<br>[0.29]      | Diarrhea<br>[0.42]   | Malaria<br>[7.82]    | Congenital<br>[0.5]  | Meningitis<br>[0.39] | Measles<br>[0.73]  | Whooping<br>[0.86] | PEM<br>[0.34]      |
| Mali              | Neonatal<br>[0.79] | Malaria<br>[4.73]    | LRI<br>[0.3]       | Diarrhea<br>[0.36]   | Congenital<br>[0.77] | STI<br>[1.21]        | Meningitis<br>[0.75] | PEM<br>[0.52]      | Whooping<br>[0.66] | iNTS<br>[7.85]     |
| Mauritania        | Neonatal<br>[0.79] | LRI<br>[0.47]        | Diarrhea<br>[0.78] | Congenital<br>[0.43] | STI<br>[2.02]        | Meningitis<br>[0.47] | PEM<br>[0.82]        | Whooping<br>[0.84] | SIDS<br>[0.87]     | Malaria<br>[65.28] |
| Niger             | Neonatal<br>[0.35] | LRI<br>[0.3]         | Diarrhea<br>[0.33] | Malaria<br>[0.97]    | Congenital<br>[0.38] | Meningitis<br>[0.63] | Whooping<br>[0.44]   | PEM<br>[0.14]      | Measles<br>[0.08]  | SIDS<br>[0.47]     |
| Nigeria           | Neonatal<br>[1.21] | LRI<br>[1.61]        | Diarrhea<br>[2.21] | Malaria<br>[1877.36] | Congenital<br>[0.51] | Meningitis<br>[1.98] | STI<br>[2.55]        | HIV<br>[12.98]     | PEM<br>[1.8]       | Measles<br>[5.89]  |
| Sao Tome Principe | Neonatal<br>[0.56] | Congenital<br>[0.55] | LRI<br>[0.38]      | Diarrhea<br>[0.34]   | PEM<br>[1.16]        | SIDS<br>[1.13]       | Other MN<br>[7.5]    | STI<br>[0.57]      | Whooping<br>[0.84] | Ileus<br>[1.53]    |
| Senegal           | Neonatal<br>[0.56] | LRI<br>[0.32]        | Diarrhea<br>[0.43] | Congenital<br>[0.44] | Meningitis<br>[0.37] | STI<br>[0.54]        | PEM<br>[0.31]        | Malaria<br>[3.28]  | SIDS<br>[0.8]      | Whooping<br>[0.38] |
| Sierra Leone      | Neonatal<br>[0.89] | Malaria<br>[45.68]   | LRI<br>[0.73]      | Congenital<br>[1.06] | Diarrhea<br>[0.64]   | PEM<br>[1.23]        | Meningitis<br>[0.89] | STI<br>[1.25]      | TB<br>[1.03]       | SIDS<br>[1.25]     |
| Togo              | Neonatal<br>[0.72] | Malaria<br>[117.28]  | Diarrhea<br>[0.68] | LRI<br>[0.35]        | Congenital<br>[0.49] | STI<br>[0.89]        | Meningitis<br>[0.33] | PEM<br>[0.39]      | Whooping<br>[0.61] | iNTS<br>[13.37]    |

**eFigure 7c. Leading ten causes of DALYs with the ratio of observed DALYs to DALYs expected on the basis of Socio-Demographic Index alone in 2017, 1-4 years, both sexes combined.** The top ten causes contributing to DALYs are listed globally, by socio-demographic quintile, and then by GBD superregion, region, country, and subnationally where modeled. For each cell, the ratio of observed DALYs to DALYs expected on the basis of socio-demographic index (SDI) alone are listed. Abbreviations: DALY=disability-adjusted life year, GBD=Global Burden of Disease.

Values shown in brackets represent the ratio of observed DALYs to predicted DALYs on the basis of Socio-Demographic Index (SDI), rounded to two (2) digits. Color ranges (shown below) were calculated to place a roughly equal number of cells into each bin.

| COLOR KEY:                                       |                       | [0.0-0.5]            | [0.5-0.72]           | [0.72-0.86]          | [0.86-0.97]          | [0.97-1.1]           | [1.1-1.23]           | [1.23-1.41]          | [1.41-2.15]            | 2.15+                |
|--------------------------------------------------|-----------------------|----------------------|----------------------|----------------------|----------------------|----------------------|----------------------|----------------------|------------------------|----------------------|
|                                                  | 1                     | 2                    | 3                    | 4                    | 5                    | 6                    | 7                    | 8                    | 9                      | 10                   |
| Global                                           | Malaria<br>[17944.77] | Diarrhea<br>[5.99]   | LRI<br>[1.96]        | Congenital<br>[0.83] | PEM<br>[16.24]       | Meningitis<br>[1.62] | Measles<br>[37.97]   | Drown<br>[1.07]      | Neonatal<br>[1.06]     | Whooping<br>[13.27]  |
| Low SDI                                          | Malaria<br>[32.4]     | Diarrhea<br>[0.61]   | LRI<br>[0.46]        | PEM<br>[0.89]        | Congenital<br>[0.61] | Measles<br>[0.52]    | Meningitis<br>[0.45] | Whooping<br>[0.79]   | Drown<br>[0.54]        | Iron<br>[1.16]       |
| Low-middle SDI                                   | Malaria<br>[1479.55]  | Diarrhea<br>[1.91]   | LRI<br>[0.93]        | Meningitis<br>[1.02] | PEM<br>[2.43]        | Congenital<br>[0.62] | Measles<br>[3.93]    | Drown<br>[0.62]      | Neonatal<br>[0.98]     | Iron<br>[1.65]       |
| Middle SDI                                       | LRI<br>[0.65]         | Congenital<br>[0.5]  | Neonatal<br>[1.04]   | Diarrhea<br>[1.37]   | Drown<br>[0.78]      | Road Inj<br>[0.54]   | Asthma<br>[0.97]     | PEM<br>[4.3]         | Measles<br>[13.73]     | Dermatitis<br>[0.69] |
| High-middle SDI                                  | Congenital<br>[1.4]   | Neonatal<br>[1.5]    | Road Inj<br>[1.91]   | LRI<br>[3.59]        | Drown<br>[2.32]      | Diarrhea<br>[2.43]   | Dermatitis<br>[0.57] | Asthma<br>[1.06]     | Leukemia<br>[1.62]     | Falls<br>[1.32]      |
| High SDI                                         | Dermatitis<br>[1.32]  | Neonatal<br>[0.8]    | Congenital<br>[0.42] | Asthma<br>[0.87]     | Road Inj<br>[0.39]   | URI<br>[1.16]        | Diarrhea<br>[0.58]   | Skin Viral<br>[0.9]  | Drown<br>[0.36]        | Urticaria<br>[0.74]  |
| Central Europe, Eastern Europe, and Central Asia | LRI<br>[3.5]          | Congenital<br>[0.82] | Neonatal<br>[1.26]   | Diarrhea<br>[2.0]    | Drown<br>[1.13]      | Dermatitis<br>[0.54] | Iron<br>[3.69]       | Fire<br>[1.29]       | Road Inj<br>[0.49]     | Falls<br>[1.23]      |
| Central Asia                                     | LRI<br>[2.89]         | Congenital<br>[0.68] | Drown<br>[1.2]       | Diarrhea<br>[1.67]   | Neonatal<br>[0.86]   | Iron<br>[2.76]       | Fire<br>[1.01]       | Vit A<br>[1.26]      | Enceph<br>[1.78]       | Road Inj<br>[0.39]   |
| Armenia                                          | Congenital<br>[0.64]  | LRI<br>[0.87]        | Iron<br>[5.43]       | Neonatal<br>[0.83]   | Diarrhea<br>[0.81]   | Dermatitis<br>[0.48] | Urticaria<br>[1.05]  | Skin Viral<br>[0.83] | Brain C<br>[0.95]      | F Body<br>[0.53]     |
| Azerbaijan                                       | LRI<br>[4.46]         | Congenital<br>[0.78] | Neonatal<br>[0.87]   | Fire<br>[2.1]        | Diarrhea<br>[1.19]   | Enceph<br>[3.46]     | Leukemia<br>[1.24]   | Drown<br>[0.57]      | Whooping<br>[12.14]    | Hemog<br>[5.03]      |
| Georgia                                          | Congenital<br>[0.52]  | LRI<br>[0.69]        | Neonatal<br>[0.87]   | Diarrhea<br>[0.77]   | Dermatitis<br>[0.44] | Fire<br>[0.79]       | Urticaria<br>[1.06]  | Asthma<br>[0.53]     | Leukemia<br>[0.65]     | Vit A<br>[0.83]      |
| Kazakhstan                                       | Congenital<br>[1.15]  | LRI<br>[1.61]        | Neonatal<br>[0.99]   | Drown<br>[1.38]      | Road Inj<br>[0.98]   | Vit A<br>[2.49]      | F Body<br>[1.7]      | Enceph<br>[3.98]     | Diarrhea<br>[0.93]     | Fire<br>[1.29]       |
| Kyrgyzstan                                       | LRI<br>[0.84]         | Congenital<br>[0.48] | Drown<br>[0.77]      | Neonatal<br>[0.85]   | Diarrhea<br>[0.63]   | Iron<br>[2.03]       | Vit A<br>[0.92]      | Hernia<br>[5.31]     | Road Inj<br>[0.28]     | F Body<br>[0.57]     |
| Mongolia                                         | LRI<br>[2.03]         | Congenital<br>[0.68] | Fire<br>[2.64]       | Neonatal<br>[0.96]   | Drown<br>[0.57]      | Road Inj<br>[0.61]   | F Body<br>[1.14]     | Diarrhea<br>[0.67]   | Vit A<br>[1.44]        | Falls<br>[1.62]      |
| Tajikistan                                       | LRI<br>[1.27]         | Diarrhea<br>[1.24]   | Congenital<br>[0.67] | Drown<br>[0.89]      | Neonatal<br>[0.76]   | Whooping<br>[1.15]   | Fire<br>[0.75]       | Iron<br>[0.75]       | Meningitis<br>[0.19]   | Epilepsy<br>[1.12]   |
| Turkmenistan                                     | LRI<br>[4.91]         | Congenital<br>[1.15] | Neonatal<br>[0.94]   | Drown<br>[0.99]      | Diarrhea<br>[0.96]   | F Body<br>[1.11]     | Enceph<br>[1.97]     | Dermatitis<br>[0.48] | TB<br>[7.01]           | Fire<br>[0.8]        |
| Uzbekistan                                       | LRI<br>[1.98]         | Drown<br>[1.08]      | Iron<br>[3.11]       | Congenital<br>[0.32] | Neonatal<br>[0.75]   | Enceph<br>[1.52]     | Vit A<br>[0.98]      | F Body<br>[0.66]     | Road Inj<br>[0.31]     | Diarrhea<br>[0.31]   |
| Central Europe                                   | Neonatal<br>[1.31]    | Congenital<br>[0.76] | Diarrhea<br>[1.89]   | Dermatitis<br>[0.59] | LRI<br>[1.3]         | Urticaria<br>[1.31]  | Falls<br>[1.2]       | Asthma<br>[0.57]     | Vit A<br>[2.15]        | Skin Viral<br>[0.85] |
| Albania                                          | Congenital<br>[0.71]  | LRI<br>[0.73]        | Neonatal<br>[1.0]    | Diarrhea<br>[0.65]   | Epilepsy<br>[1.2]    | Dermatitis<br>[0.46] | Leukemia<br>[0.75]   | Drown<br>[0.29]      | Hernia<br>[3.59]       | Brain C<br>[1.23]    |
| Bosnia                                           | Neonatal<br>[1.08]    | Congenital<br>[0.45] | Whooping<br>[14.0]   | Dermatitis<br>[0.55] | Diarrhea<br>[0.79]   | Vit A<br>[1.3]       | Urticaria<br>[1.08]  | Hernia<br>[3.41]     | Asthma<br>[0.48]       | Falls<br>[0.86]      |
| Bulgaria                                         | Congenital<br>[0.89]  | Neonatal<br>[1.16]   | LRI<br>[1.28]        | Diarrhea<br>[1.72]   | Dermatitis<br>[0.49] | Falls<br>[1.35]      | Urticaria<br>[1.24]  | Vit A<br>[1.85]      | Hernia<br>[2.91]       | Skin Viral<br>[0.84] |
| Croatia                                          | Neonatal<br>[1.39]    | Congenital<br>[0.78] | Diarrhea<br>[1.71]   | Dermatitis<br>[0.51] | Urticaria<br>[1.35]  | Hernia<br>[3.77]     | Skin Viral<br>[0.86] | Asthma<br>[0.55]     | Road Inj<br>[0.47]     | Epilepsy<br>[1.04]   |
| Czech                                            | Neonatal<br>[0.99]    | Congenital<br>[0.63] | Diarrhea<br>[2.11]   | Dermatitis<br>[0.57] | Falls<br>[1.33]      | Urticaria<br>[1.44]  | Hernia<br>[3.47]     | Skin Viral<br>[0.88] | Asthma<br>[0.49]       | Epilepsy<br>[1.05]   |
| Hungary                                          | Neonatal<br>[1.27]    | Congenital<br>[0.82] | Diarrhea<br>[2.68]   | Dermatitis<br>[0.68] | Urticaria<br>[1.31]  | Falls<br>[1.08]      | Skin Viral<br>[0.85] | Endocrine<br>[0.9]   | Epilepsy<br>[0.96]     | Asthma<br>[0.45]     |
| Macedonia                                        | Neonatal<br>[1.12]    | Congenital<br>[0.49] | Diarrhea<br>[1.3]    | Vit A<br>[2.05]      | Dermatitis<br>[0.51] | LRI<br>[0.52]        | Whooping<br>[18.16]  | Urticaria<br>[1.15]  | Falls<br>[1.15]        | Road Inj<br>[0.38]   |
| Montenegro                                       | Neonatal<br>[1.22]    | Congenital<br>[0.41] | Dermatitis<br>[0.53] | Whooping<br>[21.39]  | Urticaria<br>[1.24]  | Diarrhea<br>[0.84]   | Vit A<br>[1.75]      | Falls<br>[1.05]      | Hernia<br>[3.12]       | Skin Viral<br>[0.84] |
| Poland                                           | Neonatal<br>[1.52]    | Congenital<br>[0.89] | Dermatitis<br>[0.66] | Diarrhea<br>[1.89]   | Urticaria<br>[1.42]  | Asthma<br>[0.74]     | Falls<br>[1.14]      | Skin Viral<br>[0.87] | Upper Digest<br>[5.19] | Vit A<br>[2.35]      |
| Romania                                          | LRI<br>[2.65]         | Neonatal<br>[1.26]   | Congenital<br>[0.68] | Diarrhea<br>[2.1]    | Dermatitis<br>[0.56] | Iron<br>[4.98]       | Falls<br>[1.46]      | Vit A<br>[2.16]      | Road Inj<br>[0.51]     | Urticaria<br>[1.2]   |
| Serbia                                           | Neonatal<br>[1.41]    | Congenital<br>[0.4]  | Dermatitis<br>[0.54] | Diarrhea<br>[0.99]   | Vit A<br>[1.4]       | Urticaria<br>[1.15]  | Hernia<br>[3.33]     | Falls<br>[0.93]      | Skin Viral<br>[0.83]   | Whooping<br>[8.37]   |
| Slovakia                                         | Congenital<br>[1.03]  | Neonatal<br>[1.07]   | Diarrhea<br>[2.35]   | Dermatitis<br>[0.56] | LRI<br>[1.76]        | Urticaria<br>[1.4]   | Falls<br>[1.3]       | Hernia<br>[3.75]     | Skin Viral<br>[0.87]   | Road Inj<br>[0.53]   |
| Slovenia                                         | Neonatal<br>[1.11]    | Congenital<br>[0.72] | Diarrhea<br>[2.32]   | Dermatitis<br>[0.51] | Urticaria<br>[1.48]  | Falls<br>[1.31]      | Asthma<br>[0.69]     | Hernia<br>[3.19]     | Skin Viral<br>[0.89]   | Endocrine<br>[0.97]  |

**eFigure 7c. Leading ten causes of DALYs with the ratio of observed DALYs to DALYs expected on the basis of Socio-Demographic Index alone in 2017, 1-4 years, both sexes combined.** The top ten causes contributing to DALYs are listed globally, by socio-demographic quintile, and then by GBD superregion, region, country, and subnationally where modeled. For each cell, the ratio of observed DALYs to DALYs expected on the basis of socio-demographic index (SDI) alone are listed. Abbreviations: DALY=disability-adjusted life year, GBD=Global Burden of Disease.

Values shown in brackets represent the ratio of observed DALYs to predicted DALYs on the basis of Socio-Demographic Index (SDI), rounded to two (2) digits. Color ranges (shown below) were calculated to place a roughly equal number of cells into each bin.

| COLOR KEY:                      |                      | [0.0-0.5]            | [0.5-0.72]           | [0.72-0.86]          | [0.86-0.97]          | [0.97-1.1]           | [1.1-1.23]           | [1.23-1.41]          | [1.41-2.15]            | 2.15+                |
|---------------------------------|----------------------|----------------------|----------------------|----------------------|----------------------|----------------------|----------------------|----------------------|------------------------|----------------------|
|                                 | 1                    | 2                    | 3                    | 4                    | 5                    | 6                    | 7                    | 8                    | 9                      | 10                   |
| <b>Eastern Europe</b>           | Neonatal<br>[1.55]   | Congenital<br>[0.86] | Dermatitis<br>[0.57] | Diarrhea<br>[1.37]   | LRI<br>[0.83]        | Drown<br>[0.7]       | Falls<br>[1.43]      | Fire<br>[1.44]       | Urticaria<br>[1.28]    | Road Inj<br>[0.52]   |
| Belarus                         | Neonatal<br>[1.4]    | Congenital<br>[0.87] | Dermatitis<br>[0.62] | Fire<br>[1.72]       | Drown<br>[0.75]      | Falls<br>[1.57]      | Urticaria<br>[1.21]  | Diarrhea<br>[0.79]   | Enceph<br>[3.21]       | LRI<br>[0.44]        |
| Estonia                         | Neonatal<br>[1.59]   | Congenital<br>[0.85] | Dermatitis<br>[0.79] | Diarrhea<br>[2.42]   | Urticaria<br>[1.49]  | Drown<br>[1.13]      | LRI<br>[1.59]        | Falls<br>[1.17]      | Fire<br>[2.16]         | Skin Viral<br>[0.89] |
| Latvia                          | Neonatal<br>[1.39]   | Congenital<br>[0.77] | Diarrhea<br>[2.15]   | Dermatitis<br>[0.58] | Drown<br>[1.12]      | Fire<br>[2.19]       | Urticaria<br>[1.35]  | LRI<br>[0.9]         | Falls<br>[1.15]        | Asthma<br>[0.57]     |
| Lithuania                       | Neonatal<br>[1.63]   | Congenital<br>[0.93] | Diarrhea<br>[2.4]    | Drown<br>[1.26]      | LRI<br>[1.39]        | Dermatitis<br>[0.36] | Urticaria<br>[1.41]  | Falls<br>[1.3]       | Upper Digest<br>[5.79] | Skin Viral<br>[0.88] |
| Moldova                         | Neonatal<br>[1.3]    | Congenital<br>[0.6]  | LRI<br>[0.59]        | Drown<br>[0.49]      | Dermatitis<br>[0.68] | F Body<br>[0.88]     | Diarrhea<br>[0.56]   | Poison<br>[2.76]     | Road Inj<br>[0.35]     | Falls<br>[1.19]      |
| Russian Federation              | Neonatal<br>[1.59]   | Congenital<br>[0.77] | Diarrhea<br>[1.61]   | Dermatitis<br>[0.57] | LRI<br>[0.86]        | Falls<br>[1.43]      | Road Inj<br>[0.56]   | Drown<br>[0.66]      | Urticaria<br>[1.29]    | Fire<br>[1.44]       |
| Ukraine                         | Congenital<br>[1.02] | Neonatal<br>[1.4]    | Dermatitis<br>[0.59] | LRI<br>[0.5]         | Drown<br>[0.63]      | Meningitis<br>[0.82] | Leukemia<br>[0.95]   | Fire<br>[1.13]       | Falls<br>[1.33]        | Urticaria<br>[1.18]  |
| <b>High-income</b>              | Dermatitis<br>[1.31] | Neonatal<br>[0.93]   | Congenital<br>[0.73] | Asthma<br>[1.13]     | Diarrhea<br>[1.21]   | URI<br>[1.16]        | Road Inj<br>[0.76]   | Skin Viral<br>[0.96] | Drown<br>[0.87]        | ASD<br>[1.15]        |
| <b>Australasia</b>              | Dermatitis<br>[1.14] | Neonatal<br>[0.93]   | Asthma<br>[2.09]     | Congenital<br>[0.57] | Falls<br>[1.49]      | Drown<br>[1.24]      | Road Inj<br>[0.85]   | URI<br>[1.02]        | Skin Viral<br>[1.0]    | Urticaria<br>[1.26]  |
| Australia                       | Dermatitis<br>[1.08] | Neonatal<br>[0.91]   | Asthma<br>[2.15]     | Congenital<br>[0.57] | Falls<br>[1.44]      | Drown<br>[1.31]      | Road Inj<br>[0.84]   | URI<br>[1.02]        | Skin Viral<br>[1.0]    | Urticaria<br>[1.27]  |
| New Zealand                     | Dermatitis<br>[1.42] | Neonatal<br>[1.03]   | Asthma<br>[1.8]      | Congenital<br>[0.56] | Falls<br>[1.73]      | Road Inj<br>[0.83]   | Drown<br>[0.92]      | URI<br>[1.03]        | Urticaria<br>[1.19]    | Skin Viral<br>[0.96] |
| <b>High-income Asia Pacific</b> | Dermatitis<br>[1.26] | Neonatal<br>[1.18]   | Congenital<br>[0.77] | Asthma<br>[1.03]     | Diarrhea<br>[1.35]   | URI<br>[1.02]        | Skin Viral<br>[0.99] | Falls<br>[1.04]      | Urticaria<br>[1.17]    | LRI<br>[1.42]        |
| Brunei                          | Neonatal<br>[1.29]   | Dermatitis<br>[1.2]  | Congenital<br>[0.86] | LRI<br>[3.16]        | Road Inj<br>[1.23]   | Asthma<br>[1.01]     | Drown<br>[1.42]      | Falls<br>[1.44]      | Endocrine<br>[1.58]    | Diarrhea<br>[1.23]   |
| Japan                           | Dermatitis<br>[1.32] | Neonatal<br>[1.14]   | Congenital<br>[0.84] | Asthma<br>[1.02]     | Diarrhea<br>[1.32]   | LRI<br>[1.56]        | URI<br>[1.03]        | Skin Viral<br>[0.99] | Urticaria<br>[1.17]    | ASD<br>[1.36]        |
| Aichi                           | Dermatitis<br>[1.32] | Neonatal<br>[1.17]   | Congenital<br>[0.84] | Asthma<br>[1.05]     | ASD<br>[2.01]        | Diarrhea<br>[1.42]   | URI<br>[1.03]        | Skin Viral<br>[1.0]  | LRI<br>[1.61]          | Urticaria<br>[1.21]  |
| Akita                           | Neonatal<br>[1.19]   | Dermatitis<br>[1.33] | Congenital<br>[0.77] | Asthma<br>[0.94]     | Diarrhea<br>[1.27]   | Drown<br>[0.89]      | LRI<br>[1.07]        | URI<br>[1.03]        | Skin Viral<br>[0.96]   | Endocrine<br>[1.07]  |
| Aomori                          | Dermatitis<br>[1.33] | Neonatal<br>[1.12]   | Congenital<br>[0.78] | Asthma<br>[0.94]     | LRI<br>[1.26]        | Diarrhea<br>[1.26]   | URI<br>[1.03]        | Skin Viral<br>[0.95] | Endocrine<br>[1.08]    | Urticaria<br>[1.05]  |
| Chiba                           | Dermatitis<br>[1.32] | Neonatal<br>[1.14]   | Congenital<br>[0.95] | Asthma<br>[1.02]     | LRI<br>[1.69]        | Diarrhea<br>[1.23]   | URI<br>[1.03]        | Skin Viral<br>[0.98] | Endocrine<br>[1.17]    | Urticaria<br>[1.15]  |
| Ehime                           | Dermatitis<br>[1.32] | Neonatal<br>[0.92]   | Congenital<br>[0.63] | Asthma<br>[0.95]     | Diarrhea<br>[1.1]    | URI<br>[1.03]        | Skin Viral<br>[0.96] | Urticaria<br>[1.09]  | ASD<br>[1.35]          | Endocrine<br>[1.01]  |
| Fukui                           | Dermatitis<br>[1.32] | Neonatal<br>[1.09]   | Congenital<br>[0.68] | Asthma<br>[0.97]     | Diarrhea<br>[1.43]   | URI<br>[1.02]        | Skin Viral<br>[0.97] | Urticaria<br>[1.12]  | ASD<br>[1.35]          | Drown<br>[0.75]      |
| Fukuoka                         | Dermatitis<br>[1.32] | Neonatal<br>[1.11]   | Congenital<br>[0.82] | Asthma<br>[1.0]      | Diarrhea<br>[1.27]   | LRI<br>[1.51]        | URI<br>[1.02]        | Skin Viral<br>[0.98] | Urticaria<br>[1.14]    | Endocrine<br>[1.14]  |
| Fukushima                       | Dermatitis<br>[1.32] | Neonatal<br>[1.02]   | Congenital<br>[0.75] | Asthma<br>[0.95]     | Diarrhea<br>[1.24]   | LRI<br>[0.99]        | URI<br>[1.03]        | Skin Viral<br>[0.95] | Urticaria<br>[1.06]    | ASD<br>[1.34]        |
| Gifu                            | Dermatitis<br>[1.32] | Neonatal<br>[1.15]   | Congenital<br>[0.77] | Asthma<br>[0.98]     | Diarrhea<br>[1.44]   | LRI<br>[1.02]        | URI<br>[1.22]        | Skin Viral<br>[0.97] | Endocrine<br>[1.17]    | Urticaria<br>[1.12]  |
| Gunma                           | Dermatitis<br>[1.32] | Neonatal<br>[1.08]   | Congenital<br>[0.77] | Asthma<br>[0.99]     | Diarrhea<br>[1.34]   | LRI<br>[1.25]        | URI<br>[1.03]        | Skin Viral<br>[0.97] | Endocrine<br>[1.17]    | Urticaria<br>[1.12]  |
| Hiroshima                       | Dermatitis<br>[1.32] | Neonatal<br>[1.17]   | Congenital<br>[0.74] | Asthma<br>[1.02]     | Diarrhea<br>[1.41]   | URI<br>[1.02]        | Skin Viral<br>[0.99] | Urticaria<br>[1.17]  | ASD<br>[1.34]          | LRI<br>[1.31]        |
| Hokkaido                        | Dermatitis<br>[1.32] | Neonatal<br>[1.07]   | Congenital<br>[0.72] | Asthma<br>[0.97]     | Diarrhea<br>[1.3]    | LRI<br>[1.14]        | URI<br>[1.03]        | Skin Viral<br>[0.96] | Urticaria<br>[1.09]    | ASD<br>[1.34]        |
| Hyogo                           | Dermatitis<br>[1.32] | Neonatal<br>[1.14]   | Congenital<br>[0.73] | Diarrhea<br>[1.42]   | Asthma<br>[0.88]     | URI<br>[1.03]        | Skin Viral<br>[0.98] | LRI<br>[1.38]        | Urticaria<br>[1.15]    | ASD<br>[1.35]        |
| Ibaraki                         | Dermatitis<br>[1.32] | Neonatal<br>[1.16]   | Congenital<br>[0.8]  | Asthma<br>[0.99]     | Diarrhea<br>[1.1]    | URI<br>[1.03]        | Skin Viral<br>[0.97] | LRI<br>[1.17]        | Urticaria<br>[1.12]    | Road Inj<br>[0.57]   |
| Ishikawa                        | Dermatitis<br>[1.32] | Neonatal<br>[1.08]   | Congenital<br>[0.75] | Asthma<br>[0.99]     | Diarrhea<br>[1.35]   | URI<br>[1.03]        | Skin Viral<br>[0.98] | LRI<br>[1.24]        | Urticaria<br>[1.14]    | ASD<br>[1.34]        |
| Iwate                           | Dermatitis<br>[1.33] | Neonatal<br>[1.14]   | Congenital<br>[0.8]  | Asthma<br>[0.94]     | LRI<br>[1.22]        | Diarrhea<br>[1.2]    | URI<br>[1.03]        | Skin Viral<br>[0.95] | Drown<br>[0.7]         | F Body<br>[1.33]     |

**eFigure 7c. Leading ten causes of DALYs with the ratio of observed DALYs to DALYs expected on the basis of Socio-Demographic Index alone in 2017, 1-4 years, both sexes combined.** The top ten causes contributing to DALYs are listed globally, by socio-demographic quintile, and then by GBD superregion, region, country, and subnationally where modeled. For each cell, the ratio of observed DALYs to DALYs expected on the basis of socio-demographic index (SDI) alone are listed. Abbreviations: DALY=disability-adjusted life year, GBD=Global Burden of Disease.

Values shown in brackets represent the ratio of observed DALYs to predicted DALYs on the basis of Socio-Demographic Index (SDI), rounded to two (2) digits. Color ranges (shown below) were calculated to place a roughly equal number of cells into each bin.

| COLOR KEY: |                      | [0.0-0.5]            | [0.5-0.72]           | [0.72-0.86]        | [0.86-0.97]        | [0.97-1.1]         | [1.1-1.23]           | [1.23-1.41]          | [1.41-2.15]          | 2.15+               |
|------------|----------------------|----------------------|----------------------|--------------------|--------------------|--------------------|----------------------|----------------------|----------------------|---------------------|
|            | 1                    | 2                    | 3                    | 4                  | 5                  | 6                  | 7                    | 8                    | 9                    | 10                  |
| Kagawa     | Dermatitis<br>[1.32] | Neonatal<br>[1.06]   | Congenital<br>[0.73] | Diarrhea<br>[1.59] | Asthma<br>[0.98]   | URI<br>[1.03]      | LRI<br>[1.2]         | Skin Viral<br>[0.97] | Urticaria<br>[1.12]  | Road Inj<br>[0.58]  |
| Kagoshima  | Dermatitis<br>[1.33] | Neonatal<br>[0.95]   | Congenital<br>[0.67] | Asthma<br>[0.94]   | Diarrhea<br>[1.24] | LRI<br>[0.96]      | URI<br>[1.03]        | Skin Viral<br>[0.95] | Urticaria<br>[1.06]  | ASD<br>[1.34]       |
| Kanagawa   | Dermatitis<br>[1.32] | Neonatal<br>[1.19]   | Congenital<br>[0.96] | Asthma<br>[1.06]   | ASD<br>[1.62]      | LRI<br>[1.84]      | Diarrhea<br>[1.14]   | URI<br>[1.03]        | Skin Viral<br>[1.0]  | Urticaria<br>[1.21] |
| Kochi      | Dermatitis<br>[1.32] | Neonatal<br>[1.03]   | Congenital<br>[0.77] | Asthma<br>[0.93]   | Diarrhea<br>[1.36] | LRI<br>[1.2]       | Drown<br>[0.84]      | URI<br>[1.03]        | Skin Viral<br>[0.95] | Endocrine<br>[1.09] |
| Kumamoto   | Dermatitis<br>[1.33] | Neonatal<br>[0.98]   | Congenital<br>[0.65] | Asthma<br>[0.94]   | Diarrhea<br>[1.18] | URI<br>[1.03]      | Skin Viral<br>[0.95] | LRI<br>[0.86]        | Endocrine<br>[1.07]  | Urticaria<br>[1.06] |
| Kyoto      | Congenital<br>[1.08] | Neonatal<br>[1.2]    | Dermatitis<br>[1.09] | Asthma<br>[1.05]   | Diarrhea<br>[1.45] | LRI<br>[2.02]      | URI<br>[1.02]        | Skin Viral<br>[1.0]  | Endocrine<br>[1.26]  | Urticaria<br>[1.21] |
| Mie        | Dermatitis<br>[1.32] | Neonatal<br>[1.16]   | Congenital<br>[0.75] | Diarrhea<br>[1.65] | Asthma<br>[0.99]   | URI<br>[1.03]      | LRI<br>[1.29]        | Skin Viral<br>[0.98] | Endocrine<br>[1.2]   | Road Inj<br>[0.62]  |
| Miyagi     | Dermatitis<br>[1.32] | Congenital<br>[0.96] | Neonatal<br>[1.08]   | Diarrhea<br>[1.31] | Asthma<br>[0.83]   | LRI<br>[1.48]      | URI<br>[1.03]        | Skin Viral<br>[0.97] | Drown<br>[0.88]      | Endocrine<br>[1.2]  |
| Miyazaki   | Dermatitis<br>[1.33] | Neonatal<br>[0.97]   | Congenital<br>[0.55] | Asthma<br>[0.92]   | URI<br>[1.03]      | Diarrhea<br>[0.91] | Skin Viral<br>[0.95] | Urticaria<br>[1.05]  | ASD<br>[1.33]        | Endocrine<br>[0.91] |
| Nagano     | Dermatitis<br>[1.32] | Neonatal<br>[1.16]   | Congenital<br>[0.72] | Diarrhea<br>[1.59] | Asthma<br>[0.98]   | URI<br>[1.03]      | Skin Viral<br>[0.97] | Urticaria<br>[1.12]  | ASD<br>[1.34]        | Endocrine<br>[1.09] |
| Nagasaki   | Dermatitis<br>[1.33] | Neonatal<br>[0.99]   | Congenital<br>[0.71] | Asthma<br>[0.92]   | Diarrhea<br>[1.06] | LRI<br>[0.9]       | URI<br>[1.03]        | Skin Viral<br>[0.95] | Urticaria<br>[1.05]  | Endocrine<br>[1.04] |
| Nara       | Dermatitis<br>[1.32] | Congenital<br>[0.87] | Neonatal<br>[1.01]   | Asthma<br>[0.99]   | Diarrhea<br>[1.31] | LRI<br>[1.37]      | URI<br>[1.03]        | Skin Viral<br>[0.97] | Urticaria<br>[1.12]  | ASD<br>[1.34]       |
| Niigata    | Dermatitis<br>[1.32] | Neonatal<br>[1.11]   | Congenital<br>[0.67] | Asthma<br>[0.96]   | Diarrhea<br>[1.17] | URI<br>[1.03]      | Skin Viral<br>[0.97] | Urticaria<br>[1.11]  | ASD<br>[1.34]        | Endocrine<br>[1.0]  |
| Oita       | Dermatitis<br>[1.32] | Neonatal<br>[1.16]   | Congenital<br>[0.67] | Asthma<br>[0.96]   | Diarrhea<br>[1.36] | URI<br>[1.03]      | Skin Viral<br>[0.96] | Urticaria<br>[1.1]   | ASD<br>[1.36]        | LRI<br>[0.98]       |
| Okayama    | Dermatitis<br>[1.32] | Neonatal<br>[1.18]   | Congenital<br>[0.7]  | Asthma<br>[1.0]    | Diarrhea<br>[1.3]  | URI<br>[1.02]      | LRI<br>[1.3]         | Skin Viral<br>[0.98] | Urticaria<br>[1.13]  | ASD<br>[1.34]       |
| Okinawa    | Dermatitis<br>[1.33] | Neonatal<br>[1.0]    | Congenital<br>[0.44] | Asthma<br>[0.8]    | Diarrhea<br>[0.99] | URI<br>[1.03]      | Skin Viral<br>[0.95] | Urticaria<br>[1.04]  | ASD<br>[1.33]        | Endocrine<br>[0.94] |
| Osaka      | Dermatitis<br>[1.32] | Neonatal<br>[1.08]   | Congenital<br>[0.82] | Asthma<br>[1.05]   | Diarrhea<br>[1.27] | LRI<br>[1.72]      | URI<br>[1.02]        | Skin Viral<br>[0.99] | Urticaria<br>[1.19]  | Endocrine<br>[1.15] |
| Saga       | Dermatitis<br>[1.33] | Neonatal<br>[1.03]   | Congenital<br>[0.58] | Asthma<br>[0.95]   | Diarrhea<br>[1.17] | URI<br>[1.03]      | Skin Viral<br>[0.96] | Urticaria<br>[1.07]  | ASD<br>[1.32]        | LRI<br>[0.84]       |
| Saitama    | Dermatitis<br>[1.32] | Neonatal<br>[1.1]    | Congenital<br>[0.82] | Asthma<br>[0.99]   | Diarrhea<br>[1.25] | LRI<br>[1.45]      | URI<br>[1.03]        | Skin Viral<br>[0.97] | Endocrine<br>[1.17]  | Urticaria<br>[1.13] |
| Shiga      | Dermatitis<br>[1.57] | Neonatal<br>[1.08]   | Congenital<br>[0.8]  | Asthma<br>[1.03]   | Diarrhea<br>[1.44] | URI<br>[1.03]      | Skin Viral<br>[0.99] | Urticaria<br>[1.19]  | Endocrine<br>[1.19]  | ASD<br>[1.36]       |
| Shimane    | Dermatitis<br>[1.32] | Neonatal<br>[1.0]    | Congenital<br>[0.57] | Asthma<br>[0.93]   | Diarrhea<br>[1.22] | URI<br>[1.02]      | Skin Viral<br>[0.95] | Urticaria<br>[1.06]  | ASD<br>[1.35]        | Endocrine<br>[0.93] |
| Shizuoka   | Dermatitis<br>[1.32] | Neonatal<br>[1.22]   | Congenital<br>[0.72] | Asthma<br>[1.0]    | Diarrhea<br>[1.28] | URI<br>[1.02]      | Skin Viral<br>[0.98] | Urticaria<br>[1.16]  | ASD<br>[1.35]        | Endocrine<br>[1.13] |
| Tochigi    | Congenital<br>[1.07] | Dermatitis<br>[1.32] | Neonatal<br>[1.2]    | Asthma<br>[1.01]   | LRI<br>[1.83]      | Diarrhea<br>[1.22] | Road Inj<br>[0.72]   | URI<br>[1.03]        | Skin Viral<br>[0.98] | Endocrine<br>[1.16] |
| Tokushima  | Dermatitis<br>[1.32] | Neonatal<br>[1.11]   | Congenital<br>[0.67] | Asthma<br>[0.97]   | Diarrhea<br>[1.34] | URI<br>[1.02]      | Skin Viral<br>[0.97] | Urticaria<br>[1.11]  | LRI<br>[1.02]        | ASD<br>[1.34]       |
| Tokyo      | Dermatitis<br>[1.33] | Neonatal<br>[1.3]    | Congenital<br>[1.27] | Asthma<br>[1.21]   | LRI<br>[3.99]      | Diarrhea<br>[1.44] | URI<br>[1.03]        | Skin Viral<br>[1.06] | Urticaria<br>[1.4]   | Endocrine<br>[1.41] |
| Tottori    | Dermatitis<br>[1.32] | Neonatal<br>[1.1]    | Congenital<br>[0.73] | Asthma<br>[0.95]   | Diarrhea<br>[1.15] | Drown<br>[0.8]     | URI<br>[1.02]        | Skin Viral<br>[0.96] | LRI<br>[0.93]        | Endocrine<br>[1.11] |
| Toyama     | Dermatitis<br>[1.32] | Neonatal<br>[1.09]   | Congenital<br>[0.76] | Asthma<br>[1.0]    | Diarrhea<br>[1.35] | Drown<br>[1.14]    | URI<br>[1.03]        | LRI<br>[1.39]        | Skin Viral<br>[0.98] | Urticaria<br>[1.15] |
| Wakayama   | Dermatitis<br>[1.32] | Neonatal<br>[1.14]   | Congenital<br>[0.56] | Asthma<br>[0.95]   | Diarrhea<br>[1.12] | URI<br>[1.03]      | Skin Viral<br>[0.96] | Urticaria<br>[1.09]  | ASD<br>[1.35]        | Endocrine<br>[0.97] |
| Yamagata   | Dermatitis<br>[1.33] | Neonatal<br>[0.95]   | Congenital<br>[0.69] | Asthma<br>[0.94]   | Diarrhea<br>[1.25] | URI<br>[1.03]      | Skin Viral<br>[0.96] | LRI<br>[0.86]        | Drown<br>[0.7]       | Urticaria<br>[1.06] |
| Yamaguchi  | Dermatitis<br>[1.32] | Neonatal<br>[1.0]    | Congenital<br>[0.72] | Asthma<br>[0.98]   | Diarrhea<br>[1.4]  | LRI<br>[1.4]       | URI<br>[1.03]        | Skin Viral<br>[0.97] | Urticaria<br>[1.12]  | ASD<br>[1.35]       |
| Yamanashi  | Dermatitis<br>[1.32] | Neonatal<br>[1.23]   | Congenital<br>[0.75] | Asthma<br>[0.99]   | Diarrhea<br>[1.25] | URI<br>[1.03]      | Skin Viral<br>[0.98] | Urticaria<br>[1.14]  | ASD<br>[1.32]        | Falls<br>[0.92]     |

**eFigure 7c. Leading ten causes of DALYs with the ratio of observed DALYs to DALYs expected on the basis of Socio-Demographic Index alone in 2017, 1-4 years, both sexes combined.** The top ten causes contributing to DALYs are listed globally, by socio-demographic quintile, and then by GBD superregion, region, country, and subnationally where modeled. For each cell, the ratio of observed DALYs to DALYs expected on the basis of socio-demographic index (SDI) alone are listed. Abbreviations: DALY=disability-adjusted life year, GBD=Global Burden of Disease.

Values shown in brackets represent the ratio of observed DALYs to predicted DALYs on the basis of Socio-Demographic Index (SDI), rounded to two (2) digits. Color ranges (shown below) were calculated to place a roughly equal number of cells into each bin.

| COLOR KEY:                |                      | [0.0-0.5]            | [0.5-0.72]           | [0.72-0.86]          | [0.86-0.97]        | [0.97-1.1]           | [1.1-1.23]           | [1.23-1.41]          | [1.41-2.15]          | 2.15+                |
|---------------------------|----------------------|----------------------|----------------------|----------------------|--------------------|----------------------|----------------------|----------------------|----------------------|----------------------|
|                           | 1                    | 2                    | 3                    | 4                    | 5                  | 6                    | 7                    | 8                    | 9                    | 10                   |
| S Korea                   | Neonatal<br>[1.24]   | Dermatitis<br>[1.16] | Congenital<br>[0.6]  | Asthma<br>[1.02]     | Iron<br>[13.49]    | Diarrhea<br>[1.36]   | Road Inj<br>[0.91]   | Falls<br>[1.29]      | Skin Viral<br>[1.0]  | URI<br>[1.0]         |
| Singapore                 | Neonatal<br>[1.12]   | Dermatitis<br>[1.1]  | Congenital<br>[0.42] | Asthma<br>[1.02]     | Diarrhea<br>[1.25] | Skin Viral<br>[1.0]  | URI<br>[1.01]        | Urticaria<br>[1.14]  | Falls<br>[0.92]      | ASD<br>[1.18]        |
| High-income North America | Dermatitis<br>[1.61] | Neonatal<br>[0.96]   | Congenital<br>[0.77] | Asthma<br>[1.49]     | Road Inj<br>[1.25] | Drown<br>[1.49]      | Violence<br>[3.61]   | URI<br>[1.17]        | Skin Viral<br>[0.97] | Urticaria<br>[1.16]  |
| Canada                    | Dermatitis<br>[1.75] | Congenital<br>[0.7]  | Neonatal<br>[0.7]    | Asthma<br>[1.68]     | URI<br>[1.18]      | Skin Viral<br>[1.1]  | Road Inj<br>[0.81]   | ASD<br>[1.53]        | Diarrhea<br>[1.05]   | Urticaria<br>[1.2]   |
| Greenland                 | Congenital<br>[0.89] | Dermatitis<br>[1.68] | Violence<br>[7.73]   | Fire<br>[4.31]       | Drown<br>[1.78]    | Neonatal<br>[0.93]   | Meningitis<br>[2.37] | LRI<br>[1.12]        | HIV<br>[12.77]       | Asthma<br>[1.32]     |
| USA                       | Dermatitis<br>[1.6]  | Neonatal<br>[0.98]   | Congenital<br>[0.76] | Asthma<br>[1.46]     | Road Inj<br>[1.26] | Violence<br>[3.79]   | Drown<br>[1.5]       | URI<br>[1.17]        | Skin Viral<br>[0.95] | Urticaria<br>[1.14]  |
| Alabama                   | Dermatitis<br>[1.41] | Neonatal<br>[0.99]   | Congenital<br>[0.71] | Road Inj<br>[1.9]    | Violence<br>[4.69] | Asthma<br>[1.34]     | Drown<br>[1.67]      | Fire<br>[2.22]       | URI<br>[1.18]        | Skin Viral<br>[1.06] |
| Alaska                    | Dermatitis<br>[1.45] | Neonatal<br>[0.9]    | Congenital<br>[0.75] | Drown<br>[2.81]      | Road Inj<br>[1.23] | Asthma<br>[1.12]     | F Body<br>[2.39]     | Violence<br>[3.23]   | Fire<br>[2.7]        | URI<br>[1.18]        |
| Arizona                   | Dermatitis<br>[1.67] | Neonatal<br>[0.94]   | Congenital<br>[0.74] | Road Inj<br>[1.56]   | Asthma<br>[1.42]   | Drown<br>[1.81]      | Violence<br>[3.98]   | URI<br>[1.17]        | Urticaria<br>[1.08]  | ASD<br>[1.26]        |
| Arkansas                  | Dermatitis<br>[1.29] | Neonatal<br>[0.85]   | Congenital<br>[0.61] | Road Inj<br>[1.39]   | Drown<br>[1.26]    | Violence<br>[3.64]   | Asthma<br>[1.0]      | URI<br>[1.18]        | Fire<br>[1.6]        | Skin Viral<br>[0.89] |
| California                | Dermatitis<br>[1.8]  | Neonatal<br>[0.82]   | Congenital<br>[0.69] | Asthma<br>[1.42]     | Road Inj<br>[0.94] | Drown<br>[1.36]      | Violence<br>[3.19]   | URI<br>[1.17]        | ASD<br>[1.41]        | Urticaria<br>[1.12]  |
| Colorado                  | Dermatitis<br>[1.46] | Neonatal<br>[0.98]   | Congenital<br>[0.8]  | Asthma<br>[1.34]     | Road Inj<br>[1.4]  | Drown<br>[1.38]      | URI<br>[1.19]        | Violence<br>[3.09]   | Urticaria<br>[1.14]  | F Body<br>[1.68]     |
| Connecticut               | Dermatitis<br>[1.78] | Neonatal<br>[1.16]   | Asthma<br>[1.99]     | Congenital<br>[0.65] | URI<br>[1.16]      | Skin Viral<br>[1.14] | Urticaria<br>[1.44]  | Road Inj<br>[0.76]   | ASD<br>[1.17]        | Diarrhea<br>[0.86]   |
| Delaware                  | Dermatitis<br>[1.42] | Neonatal<br>[0.99]   | Congenital<br>[0.79] | Asthma<br>[1.59]     | Road Inj<br>[1.47] | URI<br>[1.17]        | Violence<br>[3.06]   | Drown<br>[1.24]      | Skin Viral<br>[1.1]  | Urticaria<br>[1.21]  |
| DC                        | Dermatitis<br>[2.06] | Violence<br>[18.18]  | Congenital<br>[1.13] | Neonatal<br>[1.16]   | Asthma<br>[1.69]   | Road Inj<br>[1.29]   | Endocrine<br>[2.08]  | LRI<br>[3.13]        | Drown<br>[1.8]       | Fire<br>[3.67]       |
| Florida                   | Dermatitis<br>[1.6]  | Neonatal<br>[1.08]   | Drown<br>[3.74]      | Congenital<br>[0.83] | Asthma<br>[1.77]   | Violence<br>[5.37]   | Road Inj<br>[1.43]   | Skin Viral<br>[1.15] | URI<br>[1.17]        | Urticaria<br>[1.21]  |
| Georgia                   | Dermatitis<br>[1.73] | Neonatal<br>[0.94]   | Congenital<br>[0.7]  | Asthma<br>[1.55]     | Road Inj<br>[1.52] | Violence<br>[4.88]   | Drown<br>[1.55]      | URI<br>[1.17]        | Skin Viral<br>[1.03] | LRI<br>[1.05]        |
| Hawaii                    | Dermatitis<br>[1.83] | Neonatal<br>[0.88]   | Congenital<br>[0.66] | Asthma<br>[1.65]     | Drown<br>[2.04]    | Road Inj<br>[0.93]   | URI<br>[1.16]        | Skin Viral<br>[1.13] | Urticaria<br>[1.38]  | ASD<br>[1.16]        |
| Idaho                     | Dermatitis<br>[1.35] | Neonatal<br>[0.76]   | Congenital<br>[0.51] | Road Inj<br>[0.99]   | Asthma<br>[0.82]   | URI<br>[1.18]        | Drown<br>[0.89]      | Skin Viral<br>[1.04] | ASD<br>[1.15]        | Diarrhea<br>[0.67]   |
| Illinois                  | Dermatitis<br>[1.41] | Neonatal<br>[1.13]   | Congenital<br>[0.79] | Asthma<br>[1.32]     | Violence<br>[4.28] | Road Inj<br>[0.9]    | URI<br>[1.16]        | Urticaria<br>[1.25]  | Skin Viral<br>[0.94] | Drown<br>[1.05]      |
| Indiana                   | Dermatitis<br>[1.37] | Neonatal<br>[0.94]   | Congenital<br>[0.75] | Asthma<br>[1.35]     | Road Inj<br>[1.15] | Violence<br>[3.36]   | Drown<br>[1.11]      | URI<br>[1.17]        | Skin Viral<br>[0.81] | Urticaria<br>[0.97]  |
| Iowa                      | Dermatitis<br>[1.23] | Congenital<br>[0.8]  | Neonatal<br>[0.91]   | Road Inj<br>[1.38]   | Asthma<br>[0.91]   | URI<br>[1.17]        | Drown<br>[1.14]      | Skin Viral<br>[0.93] | Urticaria<br>[1.1]   | ASD<br>[1.15]        |
| Kansas                    | Dermatitis<br>[1.31] | Neonatal<br>[0.99]   | Congenital<br>[0.72] | Asthma<br>[1.35]     | Road Inj<br>[1.41] | URI<br>[1.17]        | Drown<br>[1.15]      | Violence<br>[2.7]    | Skin Viral<br>[0.86] | Urticaria<br>[1.08]  |
| Kentucky                  | Dermatitis<br>[1.39] | Neonatal<br>[0.94]   | Congenital<br>[0.72] | Road Inj<br>[1.37]   | Asthma<br>[1.33]   | Drown<br>[1.16]      | Violence<br>[2.73]   | URI<br>[1.17]        | Fire<br>[1.89]       | Skin Viral<br>[0.97] |
| Louisiana                 | Dermatitis<br>[1.48] | Congenital<br>[0.89] | Neonatal<br>[0.95]   | Violence<br>[7.38]   | Road Inj<br>[1.88] | Drown<br>[2.35]      | Asthma<br>[1.24]     | Fire<br>[2.44]       | Skin Viral<br>[1.32] | F Body<br>[2.06]     |
| Maine                     | Dermatitis<br>[1.21] | Neonatal<br>[0.99]   | Congenital<br>[0.74] | Asthma<br>[1.61]     | Road Inj<br>[1.17] | Drown<br>[1.28]      | URI<br>[1.2]         | Urticaria<br>[1.15]  | Skin Viral<br>[0.81] | Diarrhea<br>[0.85]   |
| Maryland                  | Dermatitis<br>[1.78] | Neonatal<br>[1.17]   | Congenital<br>[0.92] | Asthma<br>[1.77]     | Violence<br>[6.38] | Road Inj<br>[1.37]   | URI<br>[1.17]        | Drown<br>[1.52]      | Urticaria<br>[1.29]  | Skin Viral<br>[0.94] |
| Massachusetts             | Dermatitis<br>[1.59] | Neonatal<br>[1.15]   | Congenital<br>[0.89] | Asthma<br>[1.78]     | URI<br>[1.17]      | Skin Viral<br>[1.1]  | ASD<br>[1.55]        | Urticaria<br>[1.51]  | Road Inj<br>[0.95]   | Drown<br>[1.37]      |
| Michigan                  | Dermatitis<br>[1.43] | Neonatal<br>[1.01]   | Congenital<br>[0.82] | Asthma<br>[1.56]     | Violence<br>[4.47] | Road Inj<br>[1.14]   | URI<br>[1.16]        | Drown<br>[1.21]      | Skin Viral<br>[1.02] | Urticaria<br>[1.18]  |
| Minnesota                 | Dermatitis<br>[1.26] | Neonatal<br>[1.01]   | Congenital<br>[0.82] | Asthma<br>[1.15]     | URI<br>[1.17]      | Road Inj<br>[0.99]   | Skin Viral<br>[1.01] | Urticaria<br>[1.27]  | ASD<br>[1.37]        | Drown<br>[1.11]      |
| Mississippi               | Dermatitis<br>[1.29] | Road Inj<br>[2.22]   | Congenital<br>[0.72] | Neonatal<br>[0.93]   | Violence<br>[5.21] | Drown<br>[1.59]      | Fire<br>[2.7]        | Asthma<br>[1.0]      | F Body<br>[1.79]     | URI<br>[1.18]        |

**eFigure 7c. Leading ten causes of DALYs with the ratio of observed DALYs to DALYs expected on the basis of Socio-Demographic Index alone in 2017, 1-4 years, both sexes combined.** The top ten causes contributing to DALYs are listed globally, by socio-demographic quintile, and then by GBD superregion, region, country, and subnationally where modeled. For each cell, the ratio of observed DALYs to DALYs expected on the basis of socio-demographic index (SDI) alone are listed. Abbreviations: DALY=disability-adjusted life year, GBD=Global Burden of Disease.

Values shown in brackets represent the ratio of observed DALYs to predicted DALYs on the basis of Socio-Demographic Index (SDI), rounded to two (2) digits. Color ranges (shown below) were calculated to place a roughly equal number of cells into each bin.

| COLOR KEY:             |                      | [0.0-0.5]            | [0.5-0.72]           | [0.72-0.86]          | [0.86-0.97]        | [0.97-1.1]           | [1.1-1.23]           | [1.23-1.41]          | [1.41-2.15]          | 2.15+                |
|------------------------|----------------------|----------------------|----------------------|----------------------|--------------------|----------------------|----------------------|----------------------|----------------------|----------------------|
|                        | 1                    | 2                    | 3                    | 4                    | 5                  | 6                    | 7                    | 8                    | 9                    | 10                   |
| Missouri               | Dermatitis<br>[1.24] | Neonatal<br>[0.98]   | Congenital<br>[0.75] | Asthma<br>[1.36]     | Road Inj<br>[1.34] | Violence<br>[4.37]   | Drown<br>[1.11]      | URI<br>[1.17]        | Skin Viral<br>[0.87] | F Body<br>[1.46]     |
| Montana                | Dermatitis<br>[1.26] | Neonatal<br>[0.97]   | Congenital<br>[0.81] | Road Inj<br>[2.02]   | Drown<br>[1.72]    | Asthma<br>[1.06]     | URI<br>[1.22]        | Skin Viral<br>[0.94] | Violence<br>[2.26]   | F Body<br>[1.51]     |
| Nebraska               | Dermatitis<br>[1.25] | Neonatal<br>[0.92]   | Congenital<br>[0.78] | Road Inj<br>[1.28]   | Asthma<br>[0.94]   | URI<br>[1.17]        | Skin Viral<br>[0.96] | Drown<br>[0.99]      | Urticaria<br>[1.14]  | ASD<br>[1.17]        |
| Nevada                 | Dermatitis<br>[1.58] | Neonatal<br>[0.91]   | Congenital<br>[0.65] | Asthma<br>[1.27]     | Road Inj<br>[1.23] | Violence<br>[4.21]   | Drown<br>[1.35]      | URI<br>[1.17]        | Urticaria<br>[1.02]  | LRI<br>[0.94]        |
| New Hampshire          | Dermatitis<br>[1.23] | Neonatal<br>[0.97]   | Congenital<br>[0.8]  | Asthma<br>[1.5]      | Road Inj<br>[1.1]  | URI<br>[1.17]        | Skin Viral<br>[0.92] | Drown<br>[1.22]      | Urticaria<br>[1.2]   | ASD<br>[1.17]        |
| New Jersey             | Dermatitis<br>[1.94] | Neonatal<br>[1.07]   | Congenital<br>[0.85] | Asthma<br>[2.05]     | URI<br>[1.15]      | ASD<br>[1.7]         | Skin Viral<br>[1.12] | Urticaria<br>[1.37]  | Road Inj<br>[0.85]   | Violence<br>[2.77]   |
| New Mexico             | Dermatitis<br>[1.46] | Neonatal<br>[1.01]   | Congenital<br>[0.76] | Road Inj<br>[1.77]   | Asthma<br>[1.38]   | Violence<br>[3.61]   | Drown<br>[1.2]       | URI<br>[1.2]         | Endocrine<br>[1.0]   | Urticaria<br>[0.96]  |
| New York               | Dermatitis<br>[1.95] | Neonatal<br>[1.12]   | Congenital<br>[0.96] | Asthma<br>[2.17]     | Violence<br>[4.44] | URI<br>[1.16]        | Skin Viral<br>[1.17] | Road Inj<br>[0.87]   | Urticaria<br>[1.38]  | Drown<br>[1.06]      |
| N Carolina             | Dermatitis<br>[1.49] | Neonatal<br>[0.97]   | Congenital<br>[0.74] | Road Inj<br>[1.51]   | Asthma<br>[1.29]   | Violence<br>[4.06]   | Drown<br>[1.35]      | URI<br>[1.17]        | Skin Viral<br>[0.97] | Urticaria<br>[1.11]  |
| N Dakota               | Dermatitis<br>[1.23] | Neonatal<br>[1.0]    | Congenital<br>[0.89] | Road Inj<br>[1.49]   | Asthma<br>[1.21]   | URI<br>[1.2]         | Drown<br>[1.31]      | Skin Viral<br>[0.91] | ASD<br>[1.16]        | Urticaria<br>[0.98]  |
| Ohio                   | Dermatitis<br>[1.51] | Congenital<br>[0.81] | Neonatal<br>[0.95]   | Asthma<br>[1.4]      | Violence<br>[3.64] | Road Inj<br>[0.99]   | Drown<br>[1.2]       | URI<br>[1.19]        | Urticaria<br>[1.15]  | Skin Viral<br>[0.9]  |
| Oklahoma               | Dermatitis<br>[1.58] | Congenital<br>[0.91] | Neonatal<br>[0.93]   | Road Inj<br>[2.01]   | Drown<br>[2.15]    | Asthma<br>[1.43]     | Violence<br>[4.78]   | URI<br>[1.18]        | Fire<br>[2.04]       | LRI<br>[1.03]        |
| Oregon                 | Dermatitis<br>[1.67] | Neonatal<br>[0.85]   | Congenital<br>[0.65] | Asthma<br>[1.16]     | Road Inj<br>[1.0]  | Drown<br>[1.39]      | URI<br>[1.16]        | Skin Viral<br>[0.94] | Urticaria<br>[1.11]  | ASD<br>[1.16]        |
| Pennsylvania           | Dermatitis<br>[1.53] | Neonatal<br>[1.0]    | Congenital<br>[0.82] | Asthma<br>[1.59]     | Road Inj<br>[1.21] | Violence<br>[3.39]   | URI<br>[1.16]        | Drown<br>[1.12]      | Skin Viral<br>[0.93] | Urticaria<br>[1.21]  |
| Rhode Island           | Dermatitis<br>[1.41] | Neonatal<br>[0.97]   | Congenital<br>[0.78] | Asthma<br>[1.63]     | URI<br>[1.18]      | Skin Viral<br>[1.14] | Road Inj<br>[0.91]   | Drown<br>[1.26]      | Urticaria<br>[1.34]  | ASD<br>[1.16]        |
| S Carolina             | Dermatitis<br>[1.72] | Neonatal<br>[0.93]   | Congenital<br>[0.7]  | Road Inj<br>[1.62]   | Asthma<br>[1.35]   | Violence<br>[4.57]   | Drown<br>[1.64]      | Fire<br>[2.24]       | URI<br>[1.17]        | F Body<br>[1.89]     |
| S Dakota               | Dermatitis<br>[1.23] | Congenital<br>[0.75] | Neonatal<br>[0.83]   | Road Inj<br>[1.52]   | Asthma<br>[0.89]   | Drown<br>[1.19]      | URI<br>[1.17]        | Skin Viral<br>[0.98] | ASD<br>[1.15]        | Urticaria<br>[0.93]  |
| Tennessee              | Dermatitis<br>[1.4]  | Neonatal<br>[0.92]   | Congenital<br>[0.64] | Road Inj<br>[1.16]   | Violence<br>[3.61] | Asthma<br>[1.04]     | Drown<br>[1.06]      | URI<br>[1.17]        | ASD<br>[1.49]        | Skin Viral<br>[0.88] |
| Texas                  | Dermatitis<br>[1.71] | Neonatal<br>[0.99]   | Congenital<br>[0.66] | Asthma<br>[1.45]     | Road Inj<br>[1.37] | Violence<br>[4.02]   | Drown<br>[1.4]       | URI<br>[1.16]        | ASD<br>[1.61]        | Skin Viral<br>[0.88] |
| Utah                   | Dermatitis<br>[1.39] | Neonatal<br>[0.85]   | Congenital<br>[0.63] | Road Inj<br>[0.99]   | Asthma<br>[0.89]   | ASD<br>[1.92]        | URI<br>[1.17]        | Skin Viral<br>[1.08] | Drown<br>[0.89]      | Urticaria<br>[0.94]  |
| Vermont                | Dermatitis<br>[1.23] | Neonatal<br>[1.04]   | Congenital<br>[0.76] | Asthma<br>[1.39]     | Road Inj<br>[1.15] | URI<br>[1.17]        | Drown<br>[1.18]      | Skin Viral<br>[0.86] | ASD<br>[1.17]        | Diarrhea<br>[0.88]   |
| Virginia               | Dermatitis<br>[1.81] | Neonatal<br>[1.08]   | Congenital<br>[0.78] | Asthma<br>[1.51]     | Violence<br>[4.11] | Road Inj<br>[1.13]   | Drown<br>[1.52]      | URI<br>[1.16]        | Urticaria<br>[1.29]  | Skin Viral<br>[0.84] |
| Washington             | Dermatitis<br>[1.64] | Neonatal<br>[0.91]   | Congenital<br>[0.77] | Asthma<br>[1.12]     | Road Inj<br>[1.1]  | Drown<br>[1.42]      | URI<br>[1.17]        | Urticaria<br>[1.29]  | Skin Viral<br>[0.96] | Violence<br>[2.45]   |
| W Virginia             | Dermatitis<br>[1.43] | Congenital<br>[0.71] | Neonatal<br>[0.94]   | Road Inj<br>[1.36]   | Asthma<br>[1.39]   | Drown<br>[1.05]      | Violence<br>[2.72]   | URI<br>[1.17]        | Endocrine<br>[1.15]  | Fire<br>[1.53]       |
| Wisconsin              | Dermatitis<br>[1.26] | Neonatal<br>[1.04]   | Congenital<br>[0.8]  | Asthma<br>[1.13]     | Road Inj<br>[1.07] | URI<br>[1.16]        | Drown<br>[1.09]      | Skin Viral<br>[0.93] | Urticaria<br>[1.13]  | Violence<br>[2.21]   |
| Wyoming                | Dermatitis<br>[1.37] | Congenital<br>[0.82] | Road Inj<br>[2.18]   | Neonatal<br>[0.83]   | Asthma<br>[1.11]   | Drown<br>[1.68]      | URI<br>[1.17]        | F Body<br>[1.83]     | LRI<br>[1.39]        | Violence<br>[2.21]   |
| Southern Latin America | Congenital<br>[0.56] | Diarrhea<br>[2.21]   | Neonatal<br>[0.85]   | Dermatitis<br>[1.05] | LRI<br>[0.42]      | Asthma<br>[0.88]     | Road Inj<br>[0.5]    | Drown<br>[0.5]       | F Body<br>[0.77]     | Skin Viral<br>[0.92] |
| Argentina              | Diarrhea<br>[2.29]   | Congenital<br>[0.56] | Neonatal<br>[0.81]   | Dermatitis<br>[1.0]  | LRI<br>[0.43]      | Drown<br>[0.52]      | Asthma<br>[0.85]     | Road Inj<br>[0.49]   | F Body<br>[0.87]     | Skin Viral<br>[0.92] |
| Chile                  | Congenital<br>[0.57] | Neonatal<br>[0.95]   | Dermatitis<br>[1.22] | Diarrhea<br>[1.92]   | Asthma<br>[0.94]   | Road Inj<br>[0.55]   | Drown<br>[0.45]      | Skin Viral<br>[0.93] | Epilepsy<br>[0.9]    | Urticaria<br>[0.86]  |
| Uruguay                | Congenital<br>[0.49] | Neonatal<br>[0.86]   | Dermatitis<br>[0.99] | Diarrhea<br>[1.08]   | Asthma<br>[0.97]   | LRI<br>[0.35]        | F Body<br>[0.78]     | Road Inj<br>[0.33]   | Skin Viral<br>[0.92] | Drown<br>[0.27]      |
| Western Europe         | Dermatitis<br>[1.12] | Neonatal<br>[0.83]   | Congenital<br>[0.68] | URI<br>[1.29]        | Asthma<br>[0.78]   | Skin Viral<br>[0.95] | Diarrhea<br>[0.91]   | Endocrine<br>[1.0]   | ASD<br>[1.04]        | Epilepsy<br>[1.01]   |

**eFigure 7c. Leading ten causes of DALYs with the ratio of observed DALYs to DALYs expected on the basis of Socio-Demographic Index alone in 2017, 1-4 years, both sexes combined.** The top ten causes contributing to DALYs are listed globally, by socio-demographic quintile, and then by GBD superregion, region, country, and subnationally where modeled. For each cell, the ratio of observed DALYs to DALYs expected on the basis of socio-demographic index (SDI) alone are listed. Abbreviations: DALY=disability-adjusted life year, GBD=Global Burden of Disease.

Values shown in brackets represent the ratio of observed DALYs to predicted DALYs on the basis of Socio-Demographic Index (SDI), rounded to two (2) digits. Color ranges (shown below) were calculated to place a roughly equal number of cells into each bin.

| COLOR KEY:           |                      | [0.0-0.5]            | [0.5-0.72]           | [0.72-0.86]          | [0.86-0.97]          | [0.97-1.1]           | [1.1-1.23]           | [1.23-1.41]          | [1.41-2.15]          | 2.15+               |
|----------------------|----------------------|----------------------|----------------------|----------------------|----------------------|----------------------|----------------------|----------------------|----------------------|---------------------|
|                      | 1                    | 2                    | 3                    | 4                    | 5                    | 6                    | 7                    | 8                    | 9                    | 10                  |
| Andorra              | Dermatitis<br>[1.31] | Congenital<br>[1.13] | Neonatal<br>[0.96]   | Asthma<br>[0.99]     | URI<br>[1.3]         | Skin Viral<br>[1.01] | Road Inj<br>[0.76]   | Diarrhea<br>[0.97]   | Endocrine<br>[1.05]  | Leukemia<br>[1.12]  |
| Austria              | Neonatal<br>[1.29]   | Congenital<br>[0.74] | Dermatitis<br>[0.83] | Diarrhea<br>[1.38]   | URI<br>[1.29]        | Endocrine<br>[1.39]  | Asthma<br>[0.72]     | Hernia<br>[3.66]     | Skin Viral<br>[0.96] | Falls<br>[0.78]     |
| Belgium              | Dermatitis<br>[0.98] | Congenital<br>[0.68] | Neonatal<br>[0.6]    | URI<br>[1.29]        | Diarrhea<br>[1.34]   | Asthma<br>[0.71]     | Skin Viral<br>[0.98] | Falls<br>[0.97]      | Endocrine<br>[1.08]  | Epilepsy<br>[1.28]  |
| Cyprus               | Neonatal<br>[1.12]   | Dermatitis<br>[0.85] | Congenital<br>[0.5]  | URI<br>[1.27]        | Asthma<br>[0.73]     | Skin Viral<br>[0.96] | Diarrhea<br>[1.01]   | ASD<br>[1.04]        | Falls<br>[0.67]      | Road Inj<br>[0.4]   |
| Denmark              | Dermatitis<br>[1.22] | Congenital<br>[0.88] | Neonatal<br>[0.75]   | URI<br>[1.27]        | Asthma<br>[0.96]     | Diarrhea<br>[1.45]   | Skin Viral<br>[1.14] | Endocrine<br>[1.31]  | ASD<br>[1.22]        | Falls<br>[0.63]     |
| Finland              | Neonatal<br>[1.69]   | Dermatitis<br>[1.3]  | Congenital<br>[0.75] | URI<br>[1.27]        | Asthma<br>[0.88]     | Diarrhea<br>[1.37]   | Skin Viral<br>[1.01] | ASD<br>[1.05]        | Falls<br>[0.74]      | Endocrine<br>[0.91] |
| France               | Dermatitis<br>[1.21] | Congenital<br>[0.72] | Neonatal<br>[0.68]   | URI<br>[1.31]        | Asthma<br>[0.81]     | Endocrine<br>[1.26]  | Skin Viral<br>[0.96] | Drown<br>[0.92]      | Road Inj<br>[0.61]   | Falls<br>[0.91]     |
| Germany              | Neonatal<br>[1.0]    | Dermatitis<br>[0.97] | Congenital<br>[0.76] | Diarrhea<br>[1.47]   | URI<br>[1.27]        | Epilepsy<br>[1.85]   | Skin Viral<br>[0.98] | Asthma<br>[0.59]     | Endocrine<br>[0.98]  | Falls<br>[0.79]     |
| Greece               | Congenital<br>[0.73] | Neonatal<br>[0.8]    | Dermatitis<br>[0.74] | Road Inj<br>[0.67]   | URI<br>[1.3]         | Asthma<br>[0.63]     | Skin Viral<br>[0.92] | Brain C<br>[1.13]    | LRI<br>[0.62]        | Diarrhea<br>[0.64]  |
| Iceland              | Dermatitis<br>[1.35] | Congenital<br>[1.03] | Neonatal<br>[0.93]   | Asthma<br>[1.26]     | URI<br>[1.27]        | Skin Viral<br>[1.1]  | Diarrhea<br>[1.2]    | Brain C<br>[1.33]    | LRI<br>[1.94]        | Falls<br>[0.82]     |
| Ireland              | Dermatitis<br>[1.15] | Congenital<br>[0.72] | Neonatal<br>[0.78]   | Asthma<br>[1.06]     | URI<br>[1.26]        | Skin Viral<br>[0.98] | ASD<br>[1.11]        | Diarrhea<br>[0.74]   | Endocrine<br>[0.87]  | Falls<br>[0.71]     |
| Israel               | Dermatitis<br>[1.05] | Neonatal<br>[0.87]   | Congenital<br>[0.59] | URI<br>[1.27]        | Asthma<br>[0.68]     | Road Inj<br>[0.57]   | Blindness<br>[2.53]  | Endocrine<br>[1.1]   | Skin Viral<br>[0.9]  | Falls<br>[0.74]     |
| Italy                | Dermatitis<br>[0.98] | Congenital<br>[0.56] | Neonatal<br>[0.64]   | URI<br>[1.29]        | Skin Viral<br>[0.95] | Endocrine<br>[0.89]  | ASD<br>[1.03]        | Asthma<br>[0.42]     | Diarrhea<br>[0.63]   | Leukemia<br>[0.67]  |
| Luxembourg           | Dermatitis<br>[1.31] | Neonatal<br>[1.17]   | Congenital<br>[0.65] | Asthma<br>[1.05]     | URI<br>[1.28]        | Diarrhea<br>[1.3]    | Skin Viral<br>[1.02] | ASD<br>[1.05]        | Falls<br>[0.73]      | Epilepsy<br>[1.2]   |
| Malta                | Congenital<br>[0.81] | Dermatitis<br>[0.88] | Neonatal<br>[0.7]    | URI<br>[1.32]        | Asthma<br>[0.76]     | Skin Viral<br>[0.93] | Falls<br>[0.94]      | ASD<br>[1.04]        | LRI<br>[0.62]        | Brain C<br>[0.71]   |
| Netherlands          | Dermatitis<br>[1.22] | Neonatal<br>[0.93]   | Congenital<br>[0.86] | URI<br>[1.32]        | Asthma<br>[0.85]     | Skin Viral<br>[0.95] | Endocrine<br>[1.22]  | ASD<br>[1.15]        | Epilepsy<br>[1.25]   | Falls<br>[0.71]     |
| Norway               | Dermatitis<br>[1.31] | Neonatal<br>[1.06]   | Diarrhea<br>[4.08]   | Congenital<br>[0.81] | Asthma<br>[1.3]      | URI<br>[1.26]        | Poison<br>[10.21]    | Skin Viral<br>[1.09] | Falls<br>[0.81]      | ASD<br>[0.98]       |
| Portugal             | Dermatitis<br>[0.94] | Congenital<br>[0.41] | Neonatal<br>[0.56]   | Asthma<br>[0.94]     | URI<br>[1.27]        | Skin Viral<br>[0.86] | Fire<br>[1.01]       | Road Inj<br>[0.34]   | Endocrine<br>[0.75]  | ASD<br>[1.03]       |
| Spain                | Neonatal<br>[0.69]   | Congenital<br>[0.52] | Dermatitis<br>[0.75] | URI<br>[1.29]        | Asthma<br>[0.6]      | Skin Viral<br>[0.92] | Endocrine<br>[0.9]   | ASD<br>[1.04]        | Falls<br>[0.74]      | Diarrhea<br>[0.53]  |
| Sweden               | Dermatitis<br>[1.63] | Congenital<br>[0.78] | Neonatal<br>[0.83]   | Asthma<br>[1.09]     | URI<br>[1.27]        | Diarrhea<br>[1.29]   | Skin Viral<br>[1.07] | ASD<br>[1.13]        | Falls<br>[0.74]      | Urticaria<br>[0.77] |
| Stockholm            | Dermatitis<br>[1.34] | Congenital<br>[0.98] | Neonatal<br>[0.83]   | Asthma<br>[1.01]     | URI<br>[1.26]        | Diarrhea<br>[1.41]   | Skin Viral<br>[1.11] | ASD<br>[1.43]        | Endocrine<br>[1.24]  | Vit A<br>[2.98]     |
| Sweden w/o Stockholm | Dermatitis<br>[1.73] | Neonatal<br>[0.82]   | Congenital<br>[0.72] | Asthma<br>[1.11]     | URI<br>[1.27]        | Diarrhea<br>[1.24]   | Skin Viral<br>[1.06] | ASD<br>[1.04]        | Falls<br>[0.75]      | Urticaria<br>[0.75] |
| Switzerland          | Dermatitis<br>[1.3]  | Congenital<br>[0.83] | Neonatal<br>[0.84]   | URI<br>[1.28]        | Asthma<br>[0.85]     | Diarrhea<br>[1.29]   | Skin Viral<br>[0.99] | ASD<br>[1.04]        | Endocrine<br>[0.91]  | Falls<br>[0.7]      |
| UK                   | Dermatitis<br>[1.43] | Neonatal<br>[0.99]   | Congenital<br>[0.71] | Asthma<br>[1.19]     | URI<br>[1.3]         | Diarrhea<br>[0.9]    | Skin Viral<br>[0.88] | Endocrine<br>[0.98]  | ASD<br>[1.11]        | LRI<br>[0.82]       |
| England              | Dermatitis<br>[1.46] | Neonatal<br>[1.03]   | Congenital<br>[0.73] | Asthma<br>[1.23]     | URI<br>[1.3]         | Diarrhea<br>[0.93]   | Skin Viral<br>[0.87] | Endocrine<br>[1.02]  | LRI<br>[0.92]        | ASD<br>[1.12]       |
| E Midlands           | Dermatitis<br>[1.44] | Neonatal<br>[0.95]   | Congenital<br>[0.64] | Asthma<br>[1.12]     | URI<br>[1.31]        | Diarrhea<br>[0.86]   | Skin Viral<br>[0.85] | Endocrine<br>[0.93]  | ASD<br>[1.1]         | LRI<br>[0.63]       |
| Derby                | Dermatitis<br>[1.43] | Congenital<br>[0.83] | Neonatal<br>[1.01]   | Asthma<br>[1.18]     | URI<br>[1.33]        | LRI<br>[1.24]        | Endocrine<br>[1.18]  | Skin Viral<br>[0.86] | Diarrhea<br>[0.8]    | Epilepsy<br>[1.05]  |
| Derbyshire           | Dermatitis<br>[1.44] | Neonatal<br>[0.87]   | Congenital<br>[0.59] | Asthma<br>[1.07]     | URI<br>[1.3]         | Diarrhea<br>[0.83]   | Skin Viral<br>[0.84] | Endocrine<br>[0.84]  | ASD<br>[1.1]         | Falls<br>[0.7]      |
| Leicester            | Dermatitis<br>[1.44] | Congenital<br>[0.73] | Neonatal<br>[0.86]   | Asthma<br>[1.15]     | URI<br>[1.28]        | Diarrhea<br>[0.9]    | Skin Viral<br>[0.86] | Endocrine<br>[1.06]  | LRI<br>[0.91]        | ASD<br>[1.1]        |
| Leicestershire       | Dermatitis<br>[1.44] | Congenital<br>[0.68] | Neonatal<br>[0.83]   | Asthma<br>[1.15]     | URI<br>[1.27]        | Skin Viral<br>[0.86] | Diarrhea<br>[0.83]   | Iron<br>[6.52]       | Endocrine<br>[0.97]  | ASD<br>[1.1]        |
| Lincolnshire         | Dermatitis<br>[1.44] | Neonatal<br>[0.91]   | Congenital<br>[0.55] | Asthma<br>[1.06]     | URI<br>[1.32]        | Diarrhea<br>[0.8]    | Skin Viral<br>[0.84] | Endocrine<br>[0.84]  | ASD<br>[1.1]         | Epilepsy<br>[0.73]  |

**eFigure 7c. Leading ten causes of DALYs with the ratio of observed DALYs to DALYs expected on the basis of Socio-Demographic Index alone in 2017, 1-4 years, both sexes combined.** The top ten causes contributing to DALYs are listed globally, by socio-demographic quintile, and then by GBD superregion, region, country, and subnationally where modeled. For each cell, the ratio of observed DALYs to DALYs expected on the basis of socio-demographic index (SDI) alone are listed. Abbreviations: DALY=disability-adjusted life year, GBD=Global Burden of Disease.

Values shown in brackets represent the ratio of observed DALYs to predicted DALYs on the basis of Socio-Demographic Index (SDI), rounded to two (2) digits. Color ranges (shown below) were calculated to place a roughly equal number of cells into each bin.

| COLOR KEY:           |                      | [0.0-0.5]            | [0.5-0.72]           | [0.72-0.86]      | [0.86-0.97]   | [0.97-1.1]           | [1.1-1.23]           | [1.23-1.41]          | [1.41-2.15]          | 2.15+                |
|----------------------|----------------------|----------------------|----------------------|------------------|---------------|----------------------|----------------------|----------------------|----------------------|----------------------|
|                      | 1                    | 2                    | 3                    | 4                | 5             | 6                    | 7                    | 8                    | 9                    | 10                   |
| Northamptonshire     | Dermatitis<br>[1.44] | Neonatal<br>[1.03]   | Congenital<br>[0.63] | Asthma<br>[1.12] | URI<br>[1.31] | Diarrhea<br>[0.96]   | Skin Viral<br>[0.85] | Endocrine<br>[0.93]  | ASD<br>[1.1]         | LRI<br>[0.61]        |
| Nottingham           | Dermatitis<br>[1.43] | Neonatal<br>[1.2]    | Congenital<br>[0.86] | Asthma<br>[1.24] | URI<br>[1.39] | Endocrine<br>[1.21]  | Skin Viral<br>[0.88] | LRI<br>[1.31]        | Diarrhea<br>[0.9]    | ASD<br>[1.11]        |
| Nottinghamshire      | Dermatitis<br>[1.44] | Neonatal<br>[0.99]   | Congenital<br>[0.54] | Asthma<br>[1.08] | URI<br>[1.31] | Diarrhea<br>[0.8]    | Skin Viral<br>[0.84] | ASD<br>[1.1]         | Endocrine<br>[0.77]  | Falls<br>[0.65]      |
| Rutland              | Dermatitis<br>[1.44] | Congenital<br>[0.66] | Neonatal<br>[0.69]   | Asthma<br>[1.13] | URI<br>[1.27] | Skin Viral<br>[0.86] | Diarrhea<br>[0.78]   | Endocrine<br>[0.93]  | ASD<br>[1.09]        | Road Inj<br>[0.41]   |
| E England            | Dermatitis<br>[1.44] | Neonatal<br>[0.91]   | Congenital<br>[0.63] | Asthma<br>[1.14] | URI<br>[1.3]  | Skin Viral<br>[0.86] | Diarrhea<br>[0.84]   | Endocrine<br>[0.94]  | ASD<br>[1.17]        | LRI<br>[0.68]        |
| Bedford              | Dermatitis<br>[1.44] | Neonatal<br>[1.14]   | Congenital<br>[0.8]  | Asthma<br>[1.15] | URI<br>[1.29] | Endocrine<br>[1.25]  | LRI<br>[0.96]        | Skin Viral<br>[0.86] | Diarrhea<br>[0.84]   | Other MN<br>[1.48]   |
| Cambridgeshire       | Dermatitis<br>[1.43] | Neonatal<br>[0.96]   | Congenital<br>[0.68] | Asthma<br>[1.22] | URI<br>[1.28] | ASD<br>[1.67]        | Skin Viral<br>[0.89] | Diarrhea<br>[0.96]   | Endocrine<br>[0.98]  | Other MN<br>[1.23]   |
| Cen Bedfordshire     | Dermatitis<br>[1.44] | Neonatal<br>[1.0]    | Congenital<br>[0.73] | Asthma<br>[1.15] | URI<br>[1.36] | Diarrhea<br>[0.89]   | LRI<br>[0.92]        | Endocrine<br>[1.09]  | Skin Viral<br>[0.86] | Other MN<br>[1.34]   |
| Essex                | Dermatitis<br>[1.44] | Neonatal<br>[0.89]   | Congenital<br>[0.56] | Asthma<br>[1.1]  | URI<br>[1.29] | Skin Viral<br>[0.85] | Diarrhea<br>[0.73]   | ASD<br>[1.11]        | Endocrine<br>[0.84]  | Epilepsy<br>[0.82]   |
| Hertfordshire        | Dermatitis<br>[1.43] | Neonatal<br>[0.93]   | Congenital<br>[0.65] | Asthma<br>[1.22] | URI<br>[1.28] | Skin Viral<br>[0.89] | Diarrhea<br>[0.89]   | ASD<br>[1.12]        | Endocrine<br>[0.85]  | Falls<br>[0.66]      |
| Luton                | Dermatitis<br>[1.44] | Congenital<br>[0.93] | Neonatal<br>[1.08]   | Asthma<br>[1.19] | LRI<br>[1.32] | URI<br>[1.31]        | Endocrine<br>[1.52]  | Diarrhea<br>[1.01]   | Epilepsy<br>[1.29]   | Skin Viral<br>[0.85] |
| Norfolk              | Dermatitis<br>[1.44] | Neonatal<br>[0.76]   | Congenital<br>[0.53] | Asthma<br>[1.09] | URI<br>[1.29] | Diarrhea<br>[0.86]   | Skin Viral<br>[0.85] | ASD<br>[1.11]        | Iron<br>[4.43]       | Endocrine<br>[0.79]  |
| Peterborough         | Dermatitis<br>[1.44] | Congenital<br>[0.77] | Neonatal<br>[0.8]    | Asthma<br>[1.13] | URI<br>[1.36] | Endocrine<br>[1.43]  | LRI<br>[0.96]        | Diarrhea<br>[0.88]   | Skin Viral<br>[0.84] | Other MN<br>[1.36]   |
| Southend-on-Sea      | Dermatitis<br>[1.44] | Neonatal<br>[1.05]   | Congenital<br>[0.7]  | Asthma<br>[1.07] | URI<br>[1.3]  | LRI<br>[0.75]        | Endocrine<br>[1.08]  | Skin Viral<br>[0.84] | Epilepsy<br>[0.99]   | Diarrhea<br>[0.66]   |
| Suffolk              | Dermatitis<br>[1.44] | Neonatal<br>[0.91]   | Congenital<br>[0.5]  | Asthma<br>[1.07] | URI<br>[1.28] | Diarrhea<br>[0.81]   | Skin Viral<br>[0.84] | ASD<br>[1.11]        | Endocrine<br>[0.77]  | Falls<br>[0.63]      |
| Thurrock             | Dermatitis<br>[1.45] | Neonatal<br>[0.99]   | Congenital<br>[0.6]  | Asthma<br>[1.08] | URI<br>[1.32] | Endocrine<br>[1.07]  | Skin Viral<br>[0.84] | LRI<br>[0.56]        | Diarrhea<br>[0.64]   | ASD<br>[1.09]        |
| Greater London       | Dermatitis<br>[1.44] | Neonatal<br>[1.13]   | Congenital<br>[0.9]  | Asthma<br>[1.52] | URI<br>[1.28] | Skin Viral<br>[0.91] | LRI<br>[1.94]        | Diarrhea<br>[1.0]    | Endocrine<br>[1.16]  | ASD<br>[1.12]        |
| Barking & Dagenham   | Dermatitis<br>[1.81] | Neonatal<br>[0.96]   | Congenital<br>[0.56] | Asthma<br>[1.21] | URI<br>[1.28] | LRI<br>[0.57]        | Iron<br>[4.13]       | Skin Viral<br>[0.83] | Diarrhea<br>[0.7]    | Endocrine<br>[0.86]  |
| Barnet               | Dermatitis<br>[1.43] | Neonatal<br>[1.02]   | Congenital<br>[0.7]  | Asthma<br>[1.38] | URI<br>[1.27] | Skin Viral<br>[0.88] | Diarrhea<br>[0.84]   | LRI<br>[1.1]         | ASD<br>[1.11]        | Endocrine<br>[0.92]  |
| Bexley               | Dermatitis<br>[1.44] | Neonatal<br>[0.95]   | Congenital<br>[0.63] | Asthma<br>[1.28] | URI<br>[1.32] | Skin Viral<br>[0.85] | Diarrhea<br>[0.79]   | Endocrine<br>[1.0]   | ASD<br>[1.18]        | Other MN<br>[1.25]   |
| Brent                | Dermatitis<br>[1.43] | Neonatal<br>[1.08]   | Congenital<br>[0.75] | Asthma<br>[1.36] | URI<br>[1.26] | Skin Viral<br>[0.87] | Diarrhea<br>[0.85]   | LRI<br>[1.01]        | Endocrine<br>[1.02]  | ASD<br>[1.1]         |
| Bromley              | Dermatitis<br>[1.43] | Neonatal<br>[1.09]   | Congenital<br>[0.66] | Asthma<br>[1.34] | URI<br>[1.28] | Skin Viral<br>[0.87] | ASD<br>[1.18]        | Diarrhea<br>[0.72]   | Endocrine<br>[0.83]  | Other MN<br>[1.22]   |
| Camden               | Dermatitis<br>[1.44] | Neonatal<br>[1.06]   | Congenital<br>[1.02] | Asthma<br>[1.66] | URI<br>[1.37] | Skin Viral<br>[0.95] | LRI<br>[3.2]         | Other MN<br>[2.17]   | Endocrine<br>[1.27]  | Diarrhea<br>[1.07]   |
| Croydon              | Dermatitis<br>[1.44] | Neonatal<br>[0.99]   | Congenital<br>[0.58] | Asthma<br>[1.3]  | URI<br>[1.28] | Skin Viral<br>[0.86] | Diarrhea<br>[0.75]   | ASD<br>[1.1]         | Endocrine<br>[0.79]  | Epilepsy<br>[0.83]   |
| Ealing               | Dermatitis<br>[1.43] | Neonatal<br>[1.17]   | Congenital<br>[0.75] | Asthma<br>[1.41] | URI<br>[1.26] | LRI<br>[1.45]        | Diarrhea<br>[0.98]   | Endocrine<br>[1.17]  | Skin Viral<br>[0.88] | ASD<br>[1.1]         |
| Enfield              | Dermatitis<br>[1.44] | Neonatal<br>[1.04]   | Congenital<br>[0.62] | Asthma<br>[1.32] | URI<br>[1.31] | Skin Viral<br>[0.86] | Diarrhea<br>[0.85]   | ASD<br>[1.11]        | Endocrine<br>[0.88]  | LRI<br>[0.75]        |
| Greenwich            | Dermatitis<br>[1.44] | Neonatal<br>[0.99]   | Congenital<br>[0.69] | Asthma<br>[1.32] | URI<br>[1.31] | Skin Viral<br>[0.86] | Diarrhea<br>[0.82]   | LRI<br>[0.82]        | ASD<br>[1.17]        | Endocrine<br>[0.85]  |
| Hackney              | Dermatitis<br>[1.43] | Neonatal<br>[1.12]   | Congenital<br>[0.84] | Asthma<br>[1.52] | URI<br>[1.3]  | Endocrine<br>[1.26]  | LRI<br>[1.79]        | Skin Viral<br>[0.9]  | Diarrhea<br>[0.98]   | ASD<br>[1.09]        |
| Hammersmith & Fulham | Dermatitis<br>[1.44] | Neonatal<br>[1.15]   | Congenital<br>[0.98] | Asthma<br>[1.63] | URI<br>[1.26] | Skin Viral<br>[0.95] | Diarrhea<br>[1.15]   | Endocrine<br>[1.26]  | LRI<br>[2.59]        | ASD<br>[1.11]        |
| Haringey             | Dermatitis<br>[1.43] | Neonatal<br>[1.14]   | Congenital<br>[0.79] | Asthma<br>[1.37] | URI<br>[1.31] | LRI<br>[1.32]        | Endocrine<br>[1.21]  | Skin Viral<br>[0.87] | Diarrhea<br>[0.85]   | Other MN<br>[1.4]    |
| Harrow               | Dermatitis<br>[1.43] | Neonatal<br>[1.15]   | Congenital<br>[0.72] | Asthma<br>[1.35] | URI<br>[1.3]  | Endocrine<br>[1.1]   | Skin Viral<br>[0.87] | Diarrhea<br>[0.86]   | Other MN<br>[1.47]   | ASD<br>[1.1]         |

**eFigure 7c. Leading ten causes of DALYs with the ratio of observed DALYs to DALYs expected on the basis of Socio-Demographic Index alone in 2017, 1-4 years, both sexes combined.** The top ten causes contributing to DALYs are listed globally, by socio-demographic quintile, and then by GBD superregion, region, country, and subnationally where modeled. For each cell, the ratio of observed DALYs to DALYs expected on the basis of socio-demographic index (SDI) alone are listed. Abbreviations: DALY=disability-adjusted life year, GBD=Global Burden of Disease.

Values shown in brackets represent the ratio of observed DALYs to predicted DALYs on the basis of Socio-Demographic Index (SDI), rounded to two (2) digits. Color ranges (shown below) were calculated to place a roughly equal number of cells into each bin.

| COLOR KEY:           |                      | [0.0-0.5]            | [0.5-0.72]           | [0.72-0.86]      | [0.86-0.97]        | [0.97-1.1]           | [1.1-1.23]           | [1.23-1.41]          | [1.41-2.15]          | 2.15+               |
|----------------------|----------------------|----------------------|----------------------|------------------|--------------------|----------------------|----------------------|----------------------|----------------------|---------------------|
|                      | 1                    | 2                    | 3                    | 4                | 5                  | 6                    | 7                    | 8                    | 9                    | 10                  |
| Havering             | Dermatitis<br>[1.44] | Neonatal<br>[0.96]   | Congenital<br>[0.61] | Asthma<br>[1.27] | URI<br>[1.32]      | Skin Viral<br>[0.85] | Diarrhea<br>[0.75]   | LRI<br>[0.68]        | Endocrine<br>[0.88]  | ASD<br>[1.11]       |
| Hillingdon           | Dermatitis<br>[1.43] | Neonatal<br>[1.22]   | Congenital<br>[0.92] | Asthma<br>[1.48] | URI<br>[1.28]      | LRI<br>[1.81]        | Diarrhea<br>[1.1]    | Skin Viral<br>[0.89] | Endocrine<br>[1.15]  | Other MN<br>[1.75]  |
| Hounslow             | Dermatitis<br>[1.43] | Neonatal<br>[1.16]   | Congenital<br>[0.88] | Asthma<br>[1.48] | URI<br>[1.29]      | LRI<br>[1.73]        | Endocrine<br>[1.25]  | Skin Viral<br>[0.89] | Diarrhea<br>[0.97]   | ASD<br>[1.11]       |
| Islington            | Dermatitis<br>[1.44] | Congenital<br>[1.14] | Neonatal<br>[1.05]   | Asthma<br>[1.64] | URI<br>[1.31]      | LRI<br>[3.72]        | Endocrine<br>[1.43]  | Skin Viral<br>[0.94] | Diarrhea<br>[1.11]   | Other MN<br>[2.12]  |
| Kensington & Chelsea | Dermatitis<br>[1.44] | Neonatal<br>[1.02]   | Congenital<br>[0.95] | Asthma<br>[1.65] | URI<br>[1.29]      | Skin Viral<br>[0.95] | Other MN<br>[2.36]   | Endocrine<br>[1.28]  | ASD<br>[1.14]        | Diarrhea<br>[1.0]   |
| Kingston upon Thames | Dermatitis<br>[1.43] | Neonatal<br>[1.18]   | Congenital<br>[0.95] | Asthma<br>[1.51] | URI<br>[1.26]      | LRI<br>[2.32]        | Endocrine<br>[1.28]  | Skin Viral<br>[0.9]  | Other MN<br>[1.81]   | Diarrhea<br>[0.94]  |
| Lambeth              | Dermatitis<br>[1.43] | Congenital<br>[0.95] | Neonatal<br>[0.88]   | Asthma<br>[1.54] | URI<br>[1.27]      | LRI<br>[2.35]        | Skin Viral<br>[0.92] | Endocrine<br>[1.16]  | Diarrhea<br>[0.94]   | ASD<br>[1.11]       |
| Lewisham             | Dermatitis<br>[1.43] | Neonatal<br>[1.19]   | Congenital<br>[0.62] | Asthma<br>[1.32] | URI<br>[1.29]      | Skin Viral<br>[0.86] | LRI<br>[0.95]        | ASD<br>[1.17]        | Diarrhea<br>[0.75]   | Endocrine<br>[0.87] |
| Merton               | Dermatitis<br>[1.43] | Neonatal<br>[1.1]    | Congenital<br>[0.89] | Asthma<br>[1.46] | URI<br>[1.27]      | Skin Viral<br>[0.89] | Endocrine<br>[1.17]  | LRI<br>[1.5]         | Diarrhea<br>[0.85]   | Other MN<br>[1.55]  |
| Newham               | Dermatitis<br>[1.43] | Neonatal<br>[1.12]   | Congenital<br>[0.8]  | Asthma<br>[1.36] | URI<br>[1.28]      | LRI<br>[1.25]        | Endocrine<br>[1.43]  | Diarrhea<br>[0.93]   | Skin Viral<br>[0.86] | Other MN<br>[1.53]  |
| Redbridge            | Dermatitis<br>[1.44] | Neonatal<br>[0.99]   | Congenital<br>[0.63] | Asthma<br>[1.28] | URI<br>[1.28]      | Skin Viral<br>[0.85] | Diarrhea<br>[0.81]   | LRI<br>[0.75]        | Endocrine<br>[0.88]  | ASD<br>[1.11]       |
| Richmond upon Thames | Dermatitis<br>[1.43] | Neonatal<br>[1.24]   | Congenital<br>[1.03] | Asthma<br>[1.53] | URI<br>[1.34]      | Other MN<br>[2.11]   | LRI<br>[2.18]        | Skin Viral<br>[0.91] | Endocrine<br>[1.25]  | ASD<br>[1.12]       |
| Southwark            | Dermatitis<br>[1.43] | Congenital<br>[0.94] | Neonatal<br>[0.89]   | Asthma<br>[1.57] | URI<br>[1.27]      | Skin Viral<br>[0.93] | LRI<br>[2.49]        | Endocrine<br>[1.22]  | Diarrhea<br>[0.99]   | ASD<br>[1.17]       |
| Sutton               | Dermatitis<br>[1.43] | Neonatal<br>[1.24]   | Congenital<br>[0.78] | Asthma<br>[1.35] | URI<br>[1.25]      | Skin Viral<br>[0.86] | LRI<br>[0.97]        | Endocrine<br>[1.01]  | Diarrhea<br>[0.81]   | ASD<br>[1.11]       |
| Tower Hamlets        | Dermatitis<br>[1.43] | Neonatal<br>[1.23]   | Congenital<br>[0.95] | Asthma<br>[1.58] | URI<br>[1.28]      | Skin Viral<br>[0.92] | Endocrine<br>[1.28]  | Diarrhea<br>[1.06]   | LRI<br>[2.19]        | ASD<br>[1.12]       |
| Waltham Forest       | Dermatitis<br>[1.44] | Neonatal<br>[0.99]   | Congenital<br>[0.59] | Asthma<br>[1.25] | URI<br>[1.28]      | Diarrhea<br>[0.79]   | LRI<br>[0.71]        | Skin Viral<br>[0.84] | Endocrine<br>[0.88]  | ASD<br>[1.11]       |
| Wandsworth           | Dermatitis<br>[1.43] | Neonatal<br>[1.0]    | Congenital<br>[0.81] | Asthma<br>[1.56] | URI<br>[1.27]      | Skin Viral<br>[0.93] | ASD<br>[1.12]        | Diarrhea<br>[0.89]   | LRI<br>[1.89]        | Endocrine<br>[0.99] |
| Westminster          | Dermatitis<br>[1.44] | Congenital<br>[1.08] | Neonatal<br>[1.0]    | Asthma<br>[1.65] | URI<br>[1.28]      | Other MN<br>[2.45]   | Endocrine<br>[1.46]  | LRI<br>[3.21]        | Skin Viral<br>[0.94] | Diarrhea<br>[1.06]  |
| NE England           | Dermatitis<br>[1.54] | Congenital<br>[0.68] | Neonatal<br>[0.9]    | Asthma<br>[1.1]  | URI<br>[1.3]       | Diarrhea<br>[1.02]   | Skin Viral<br>[0.84] | Endocrine<br>[0.91]  | LRI<br>[0.63]        | ASD<br>[1.1]        |
| County Durham        | Dermatitis<br>[1.68] | Neonatal<br>[0.92]   | Congenital<br>[0.58] | Asthma<br>[1.09] | URI<br>[1.29]      | Diarrhea<br>[0.98]   | Skin Viral<br>[0.84] | Endocrine<br>[0.82]  | ASD<br>[1.1]         | Falls<br>[0.66]     |
| Darlington           | Dermatitis<br>[1.44] | Congenital<br>[0.77] | Neonatal<br>[0.89]   | Asthma<br>[1.13] | URI<br>[1.34]      | Diarrhea<br>[1.0]    | Endocrine<br>[1.05]  | Skin Viral<br>[0.85] | LRI<br>[0.74]        | Epilepsy<br>[0.97]  |
| Gateshead            | Dermatitis<br>[1.66] | Neonatal<br>[0.98]   | Congenital<br>[0.62] | Asthma<br>[1.11] | URI<br>[1.28]      | Diarrhea<br>[0.98]   | Skin Viral<br>[0.85] | ASD<br>[1.1]         | Endocrine<br>[0.8]   | LRI<br>[0.56]       |
| Hartlepool           | Dermatitis<br>[1.45] | Congenital<br>[0.71] | Neonatal<br>[1.01]   | Asthma<br>[1.09] | URI<br>[1.26]      | LRI<br>[0.67]        | Diarrhea<br>[0.83]   | Skin Viral<br>[0.83] | Endocrine<br>[0.93]  | Epilepsy<br>[0.87]  |
| Middlesbrough        | Dermatitis<br>[1.45] | Congenital<br>[0.72] | Neonatal<br>[0.82]   | Asthma<br>[1.11] | URI<br>[1.28]      | Diarrhea<br>[1.06]   | LRI<br>[0.75]        | Skin Viral<br>[0.84] | Endocrine<br>[0.92]  | ASD<br>[1.08]       |
| Newcastle upon Tyne  | Dermatitis<br>[1.43] | Congenital<br>[1.0]  | Neonatal<br>[0.95]   | Asthma<br>[1.27] | URI<br>[1.32]      | Diarrhea<br>[1.27]   | Endocrine<br>[1.31]  | LRI<br>[1.57]        | Skin Viral<br>[0.88] | Epilepsy<br>[1.25]  |
| N Tyneside           | Dermatitis<br>[1.44] | Congenital<br>[0.68] | Neonatal<br>[0.85]   | Asthma<br>[1.11] | Diarrhea<br>[1.14] | URI<br>[1.26]        | Skin Viral<br>[0.84] | LRI<br>[0.64]        | ASD<br>[1.12]        | Endocrine<br>[0.84] |
| Northumberland       | Dermatitis<br>[1.44] | Neonatal<br>[0.83]   | Congenital<br>[0.59] | Asthma<br>[1.08] | URI<br>[1.34]      | Diarrhea<br>[0.92]   | Skin Viral<br>[0.84] | ASD<br>[1.11]        | Endocrine<br>[0.79]  | Falls<br>[0.67]     |
| Redcar & Cleveland   | Dermatitis<br>[1.45] | Congenital<br>[0.55] | Neonatal<br>[0.79]   | Asthma<br>[1.04] | URI<br>[1.29]      | Diarrhea<br>[0.89]   | Skin Viral<br>[0.83] | ASD<br>[1.11]        | LRI<br>[0.38]        | Endocrine<br>[0.71] |
| S Tyneside           | Dermatitis<br>[1.68] | Congenital<br>[0.61] | Neonatal<br>[0.83]   | Asthma<br>[1.05] | URI<br>[1.3]       | Diarrhea<br>[0.87]   | Skin Viral<br>[0.83] | LRI<br>[0.46]        | Endocrine<br>[0.79]  | ASD<br>[1.1]        |
| Stockton-on-Tees     | Dermatitis<br>[1.44] | Neonatal<br>[1.07]   | Congenital<br>[0.72] | Asthma<br>[1.13] | URI<br>[1.33]      | Diarrhea<br>[0.99]   | Skin Viral<br>[0.85] | LRI<br>[0.75]        | Endocrine<br>[0.94]  | Other MN<br>[1.2]   |
| Sunderland           | Dermatitis<br>[1.67] | Congenital<br>[0.69] | Neonatal<br>[0.8]    | Asthma<br>[0.99] | URI<br>[1.28]      | Diarrhea<br>[1.03]   | LRI<br>[0.72]        | Endocrine<br>[1.01]  | Skin Viral<br>[0.84] | ASD<br>[1.1]        |

**eFigure 7c. Leading ten causes of DALYs with the ratio of observed DALYs to DALYs expected on the basis of Socio-Demographic Index alone in 2017, 1-4 years, both sexes combined.** The top ten causes contributing to DALYs are listed globally, by socio-demographic quintile, and then by GBD superregion, region, country, and subnationally where modeled. For each cell, the ratio of observed DALYs to DALYs expected on the basis of socio-demographic index (SDI) alone are listed. Abbreviations: DALY=disability-adjusted life year, GBD=Global Burden of Disease.

Values shown in brackets represent the ratio of observed DALYs to predicted DALYs on the basis of Socio-Demographic Index (SDI), rounded to two (2) digits. Color ranges (shown below) were calculated to place a roughly equal number of cells into each bin.

| COLOR KEY:            |                      | [0.0-0.5]            | [0.5-0.72]           | [0.72-0.86]      | [0.86-0.97]   | [0.97-1.1]           | [1.1-1.23]           | [1.23-1.41]          | [1.41-2.15]          | 2.15+                |
|-----------------------|----------------------|----------------------|----------------------|------------------|---------------|----------------------|----------------------|----------------------|----------------------|----------------------|
|                       | 1                    | 2                    | 3                    | 4                | 5             | 6                    | 7                    | 8                    | 9                    | 10                   |
| NW England            | Dermatitis<br>[1.44] | Neonatal<br>[1.11]   | Congenital<br>[0.79] | Asthma<br>[1.16] | URI<br>[1.3]  | Diarrhea<br>[0.99]   | LRI<br>[0.94]        | Endocrine<br>[1.1]   | Skin Viral<br>[0.85] | ASD<br>[1.1]         |
| Blackburn with Darwen | Congenital<br>[0.91] | Dermatitis<br>[1.45] | Neonatal<br>[1.13]   | Asthma<br>[1.15] | LRI<br>[1.04] | Endocrine<br>[1.57]  | URI<br>[1.34]        | Diarrhea<br>[1.02]   | Other MN<br>[1.48]   | Iron<br>[4.45]       |
| Blackpool             | Dermatitis<br>[1.47] | Congenital<br>[0.73] | Neonatal<br>[1.04]   | Asthma<br>[1.08] | URI<br>[0.68] | Diarrhea<br>[1.29]   | Endocrine<br>[1.17]  | Diarrhea<br>[0.7]    | Skin Viral<br>[0.83] | Falls<br>[0.92]      |
| Bolton                | Dermatitis<br>[1.45] | Neonatal<br>[1.03]   | Congenital<br>[0.67] | Asthma<br>[1.08] | URI<br>[1.28] | Diarrhea<br>[0.86]   | Endocrine<br>[1.12]  | LRI<br>[0.65]        | Skin Viral<br>[0.84] | Iron<br>[4.15]       |
| Bury                  | Dermatitis<br>[1.44] | Congenital<br>[0.76] | Neonatal<br>[1.01]   | Asthma<br>[1.09] | URI<br>[1.31] | LRI<br>[0.81]        | Diarrhea<br>[0.93]   | Iron<br>[5.53]       | Endocrine<br>[1.05]  | Skin Viral<br>[0.84] |
| Cheshire E            | Neonatal<br>[1.37]   | Dermatitis<br>[1.43] | Congenital<br>[0.9]  | Asthma<br>[1.23] | URI<br>[1.29] | Diarrhea<br>[1.06]   | Skin Viral<br>[0.88] | LRI<br>[1.2]         | Endocrine<br>[1.03]  | ASD<br>[1.11]        |
| Cheshire W & Chester  | Dermatitis<br>[1.43] | Neonatal<br>[1.14]   | Congenital<br>[0.88] | Asthma<br>[1.2]  | URI<br>[1.28] | Diarrhea<br>[1.05]   | Skin Viral<br>[0.87] | LRI<br>[1.1]         | Endocrine<br>[1.06]  | ASD<br>[1.11]        |
| Cumbria               | Dermatitis<br>[1.44] | Neonatal<br>[1.07]   | Congenital<br>[0.7]  | Asthma<br>[1.13] | URI<br>[1.28] | Diarrhea<br>[1.02]   | Skin Viral<br>[0.85] | Iron<br>[5.68]       | Endocrine<br>[0.89]  | ASD<br>[1.1]         |
| Halton                | Dermatitis<br>[1.44] | Congenital<br>[0.88] | Neonatal<br>[1.16]   | Asthma<br>[1.15] | LRI<br>[1.24] | URI<br>[1.37]        | Endocrine<br>[1.28]  | Diarrhea<br>[0.99]   | Meningitis<br>[1.34] | Skin Viral<br>[0.85] |
| Knowsley              | Dermatitis<br>[1.44] | Congenital<br>[0.88] | Neonatal<br>[1.09]   | Asthma<br>[1.12] | LRI<br>[1.04] | URI<br>[1.35]        | Diarrhea<br>[0.9]    | Endocrine<br>[1.16]  | Skin Viral<br>[0.84] | Epilepsy<br>[1.1]    |
| Lancashire            | Dermatitis<br>[1.44] | Neonatal<br>[1.08]   | Congenital<br>[0.75] | Asthma<br>[1.14] | URI<br>[1.31] | Diarrhea<br>[1.05]   | LRI<br>[0.83]        | Endocrine<br>[1.05]  | Skin Viral<br>[0.85] | ASD<br>[1.1]         |
| Liverpool             | Dermatitis<br>[1.43] | Neonatal<br>[1.21]   | Congenital<br>[0.82] | Asthma<br>[1.19] | URI<br>[1.29] | LRI<br>[1.25]        | Diarrhea<br>[0.92]   | Skin Viral<br>[0.87] | Endocrine<br>[1.08]  | ASD<br>[1.1]         |
| Manchester            | Dermatitis<br>[1.43] | Neonatal<br>[1.28]   | Congenital<br>[0.94] | Asthma<br>[1.32] | URI<br>[1.28] | Diarrhea<br>[1.24]   | Endocrine<br>[1.34]  | Skin Viral<br>[0.9]  | LRI<br>[1.74]        | ASD<br>[1.1]         |
| Oldham                | Dermatitis<br>[1.46] | Congenital<br>[0.77] | Neonatal<br>[0.85]   | Asthma<br>[1.09] | URI<br>[1.33] | LRI<br>[0.62]        | Endocrine<br>[1.21]  | Diarrhea<br>[0.83]   | Skin Viral<br>[0.83] | Epilepsy<br>[0.97]   |
| Rochdale              | Dermatitis<br>[1.45] | Congenital<br>[0.67] | Neonatal<br>[0.86]   | Asthma<br>[1.09] | URI<br>[1.3]  | Iron<br>[5.08]       | LRI<br>[0.62]        | Diarrhea<br>[0.86]   | Endocrine<br>[1.12]  | Skin Viral<br>[0.83] |
| Salford               | Dermatitis<br>[1.43] | Neonatal<br>[1.23]   | Congenital<br>[0.83] | Asthma<br>[1.18] | URI<br>[1.28] | LRI<br>[1.07]        | Endocrine<br>[1.17]  | Diarrhea<br>[0.92]   | Skin Viral<br>[0.86] | ASD<br>[1.1]         |
| Sefton                | Dermatitis<br>[1.44] | Neonatal<br>[1.06]   | Congenital<br>[0.67] | Asthma<br>[1.08] | URI<br>[1.31] | Diarrhea<br>[0.8]    | Skin Viral<br>[0.84] | Endocrine<br>[0.96]  | LRI<br>[0.57]        | ASD<br>[1.11]        |
| St Helens             | Dermatitis<br>[1.45] | Neonatal<br>[1.08]   | Congenital<br>[0.7]  | Asthma<br>[1.07] | URI<br>[1.29] | LRI<br>[0.7]         | Diarrhea<br>[0.84]   | Endocrine<br>[1.04]  | Skin Viral<br>[0.84] | ASD<br>[1.1]         |
| Stockport             | Dermatitis<br>[1.43] | Neonatal<br>[0.95]   | Congenital<br>[0.72] | Asthma<br>[1.16] | URI<br>[1.29] | Diarrhea<br>[1.11]   | Skin Viral<br>[0.86] | Endocrine<br>[1.0]   | Iron<br>[6.08]       | ASD<br>[1.11]        |
| Tameside              | Dermatitis<br>[1.45] | Congenital<br>[0.63] | Neonatal<br>[0.89]   | Asthma<br>[1.07] | URI<br>[1.27] | Diarrhea<br>[0.88]   | Skin Viral<br>[0.83] | LRI<br>[0.48]        | Endocrine<br>[0.89]  | ASD<br>[1.1]         |
| Trafford              | Dermatitis<br>[1.43] | Neonatal<br>[1.26]   | Congenital<br>[0.86] | Asthma<br>[1.27] | URI<br>[1.27] | Diarrhea<br>[1.03]   | Skin Viral<br>[0.89] | Endocrine<br>[1.12]  | ASD<br>[1.1]         | Other MN<br>[1.46]   |
| Warrington            | Dermatitis<br>[1.43] | Neonatal<br>[1.31]   | Congenital<br>[0.86] | Asthma<br>[1.23] | URI<br>[1.27] | LRI<br>[1.51]        | Diarrhea<br>[1.04]   | Skin Viral<br>[0.88] | Endocrine<br>[0.96]  | ASD<br>[1.1]         |
| Wigan                 | Dermatitis<br>[1.45] | Neonatal<br>[1.05]   | Congenital<br>[0.56] | Asthma<br>[1.05] | URI<br>[1.32] | Diarrhea<br>[0.76]   | Iron<br>[4.1]        | Skin Viral<br>[0.83] | LRI<br>[0.45]        | Endocrine<br>[0.8]   |
| Wirral                | Dermatitis<br>[1.44] | Neonatal<br>[1.16]   | Congenital<br>[0.73] | Asthma<br>[1.07] | URI<br>[1.33] | LRI<br>[0.68]        | Diarrhea<br>[0.86]   | Endocrine<br>[1.07]  | Skin Viral<br>[0.83] | Epilepsy<br>[0.91]   |
| SE England            | Dermatitis<br>[1.54] | Neonatal<br>[1.02]   | Congenital<br>[0.67] | Asthma<br>[1.26] | URI<br>[1.3]  | Skin Viral<br>[0.87] | Diarrhea<br>[0.89]   | ASD<br>[1.19]        | Endocrine<br>[0.89]  | Epilepsy<br>[0.92]   |
| Bracknell Forest      | Dermatitis<br>[1.43] | Congenital<br>[0.8]  | Neonatal<br>[0.86]   | Asthma<br>[1.21] | URI<br>[1.31] | Skin Viral<br>[0.89] | LRI<br>[1.3]         | Iron<br>[8.48]       | Diarrhea<br>[0.87]   | Endocrine<br>[0.99]  |
| Brighton & Hove       | Dermatitis<br>[1.65] | Neonatal<br>[1.16]   | Congenital<br>[0.84] | Asthma<br>[1.27] | URI<br>[1.28] | Skin Viral<br>[0.9]  | Endocrine<br>[1.1]   | Diarrhea<br>[0.87]   | ASD<br>[1.1]         | LRI<br>[1.36]        |
| Buckinghamshire       | Dermatitis<br>[1.43] | Neonatal<br>[1.19]   | Congenital<br>[0.73] | Asthma<br>[1.19] | URI<br>[1.33] | Epilepsy<br>[1.72]   | Diarrhea<br>[0.98]   | Skin Viral<br>[0.88] | Endocrine<br>[0.96]  | ASD<br>[1.11]        |
| E Sussex              | Dermatitis<br>[1.64] | Neonatal<br>[1.03]   | Congenital<br>[0.63] | Asthma<br>[1.03] | URI<br>[1.3]  | Diarrhea<br>[0.8]    | Skin Viral<br>[0.84] | ASD<br>[1.18]        | Endocrine<br>[0.83]  | Iron<br>[4.08]       |
| Hampshire             | Dermatitis<br>[1.43] | Neonatal<br>[0.98]   | Congenital<br>[0.59] | Asthma<br>[1.68] | URI<br>[1.3]  | Skin Viral<br>[0.87] | Diarrhea<br>[0.89]   | Iron<br>[6.7]        | Skin Viral<br>[1.11] | Endocrine<br>[0.85]  |
| Isle of Wight         | Dermatitis<br>[1.42] | Neonatal<br>[0.92]   | Congenital<br>[0.66] | Asthma<br>[1.58] | URI<br>[1.3]  | Skin Viral<br>[0.84] | Diarrhea<br>[0.76]   | LRI<br>[0.59]        | Endocrine<br>[0.87]  | ASD<br>[1.1]         |

**eFigure 7c. Leading ten causes of DALYs with the ratio of observed DALYs to DALYs expected on the basis of Socio-Demographic Index alone in 2017, 1-4 years, both sexes combined.** The top ten causes contributing to DALYs are listed globally, by socio-demographic quintile, and then by GBD superregion, region, country, and subnationally where modeled. For each cell, the ratio of observed DALYs to DALYs expected on the basis of socio-demographic index (SDI) alone are listed. Abbreviations: DALY=disability-adjusted life year, GBD=Global Burden of Disease.

Values shown in brackets represent the ratio of observed DALYs to predicted DALYs on the basis of Socio-Demographic Index (SDI), rounded to two (2) digits. Color ranges (shown below) were calculated to place a roughly equal number of cells into each bin.

| COLOR KEY:           |                      | [0.0-0.5]            | [0.5-0.72]           | [0.72-0.86]      | [0.86-0.97]   | [0.97-1.1]           | [1.1-1.23]           | [1.23-1.41]          | [1.41-2.15]          | 2.15+               |
|----------------------|----------------------|----------------------|----------------------|------------------|---------------|----------------------|----------------------|----------------------|----------------------|---------------------|
|                      | 1                    | 2                    | 3                    | 4                | 5             | 6                    | 7                    | 8                    | 9                    | 10                  |
| Kent                 | Dermatitis<br>[1.63] | Neonatal<br>[0.95]   | Congenital<br>[0.54] | Asthma<br>[1.09] | URI<br>[1.28] | ASD<br>[1.55]        | Skin Viral<br>[0.85] | Diarrhea<br>[0.79]   | Endocrine<br>[0.77]  | Falls<br>[0.65]     |
| Medway               | Dermatitis<br>[1.44] | Neonatal<br>[1.0]    | Congenital<br>[0.55] | Asthma<br>[1.05] | URI<br>[1.32] | Diarrhea<br>[0.8]    | Skin Viral<br>[0.84] | ASD<br>[1.1]         | Endocrine<br>[0.75]  | Epilepsy<br>[0.8]   |
| Milton Keynes        | Dermatitis<br>[1.43] | Neonatal<br>[0.93]   | Congenital<br>[0.74] | Asthma<br>[1.21] | URI<br>[1.28] | Diarrhea<br>[1.01]   | LRI<br>[1.27]        | Skin Viral<br>[0.88] | Endocrine<br>[0.96]  | ASD<br>[1.11]       |
| Oxfordshire          | Dermatitis<br>[1.79] | Neonatal<br>[0.98]   | Congenital<br>[0.74] | Asthma<br>[1.24] | URI<br>[1.28] | Skin Viral<br>[0.9]  | Diarrhea<br>[0.91]   | Endocrine<br>[1.0]   | ASD<br>[1.11]        | Other MN<br>[1.27]  |
| Portsmouth           | Dermatitis<br>[1.43] | Neonatal<br>[1.01]   | Congenital<br>[0.66] | Asthma<br>[1.18] | URI<br>[1.27] | Diarrhea<br>[0.96]   | Skin Viral<br>[0.88] | Endocrine<br>[0.95]  | ASD<br>[1.1]         | Epilepsy<br>[0.99]  |
| Reading              | Dermatitis<br>[1.79] | Neonatal<br>[1.3]    | Congenital<br>[1.05] | Asthma<br>[1.33] | URI<br>[1.3]  | LRI<br>[2.61]        | Endocrine<br>[1.44]  | Diarrhea<br>[1.06]   | Skin Viral<br>[0.91] | Epilepsy<br>[1.37]  |
| Slough               | Dermatitis<br>[1.43] | Congenital<br>[0.97] | Neonatal<br>[1.13]   | Asthma<br>[1.28] | LRI<br>[1.91] | URI<br>[1.28]        | Endocrine<br>[1.27]  | Diarrhea<br>[1.04]   | Skin Viral<br>[0.88] | Epilepsy<br>[1.16]  |
| Southampton          | Dermatitis<br>[1.43] | Neonatal<br>[1.01]   | Congenital<br>[0.82] | Asthma<br>[1.2]  | URI<br>[1.3]  | Diarrhea<br>[0.95]   | Skin Viral<br>[0.87] | Endocrine<br>[1.12]  | LRI<br>[1.15]        | Other MN<br>[1.46]  |
| Surrey               | Dermatitis<br>[1.61] | Neonatal<br>[1.12]   | Congenital<br>[0.66] | Asthma<br>[1.24] | URI<br>[1.29] | Skin Viral<br>[0.9]  | Diarrhea<br>[0.88]   | ASD<br>[1.12]        | Iron<br>[7.35]       | Falls<br>[0.64]     |
| West Berkshire       | Dermatitis<br>[1.43] | Neonatal<br>[0.98]   | Congenital<br>[0.79] | Asthma<br>[1.23] | URI<br>[1.29] | Skin Viral<br>[0.88] | Diarrhea<br>[0.92]   | ASD<br>[1.12]        | Endocrine<br>[0.95]  | Other MN<br>[1.46]  |
| W Sussex             | Dermatitis<br>[1.48] | Neonatal<br>[1.0]    | Congenital<br>[0.62] | Asthma<br>[1.28] | URI<br>[1.3]  | Skin Viral<br>[0.86] | Diarrhea<br>[0.84]   | ASD<br>[1.11]        | Endocrine<br>[0.8]   | Falls<br>[0.64]     |
| Windsor & Maidenhead | Dermatitis<br>[1.43] | Congenital<br>[1.02] | Neonatal<br>[1.06]   | Asthma<br>[1.3]  | URI<br>[1.33] | LRI<br>[2.27]        | Diarrhea<br>[1.06]   | Endocrine<br>[1.24]  | Skin Viral<br>[0.9]  | Other MN<br>[1.9]   |
| Wokingham            | Dermatitis<br>[1.43] | Neonatal<br>[1.05]   | Congenital<br>[0.87] | Asthma<br>[1.26] | URI<br>[1.3]  | Skin Viral<br>[0.9]  | Diarrhea<br>[0.99]   | LRI<br>[1.53]        | Other MN<br>[1.66]   | Endocrine<br>[1.04] |
| SW England           | Dermatitis<br>[1.44] | Neonatal<br>[1.04]   | Congenital<br>[0.62] | Asthma<br>[1.13] | URI<br>[1.3]  | Skin Viral<br>[0.86] | Diarrhea<br>[0.85]   | ASD<br>[1.15]        | Iron<br>[5.66]       | Endocrine<br>[0.88] |
| Bath & NE Somerset   | Neonatal<br>[1.4]    | Dermatitis<br>[1.43] | Congenital<br>[0.79] | Asthma<br>[1.23] | URI<br>[1.27] | Diarrhea<br>[1.03]   | Skin Viral<br>[0.89] | ASD<br>[1.32]        | Other MN<br>[1.56]   | Endocrine<br>[0.92] |
| Bournemouth          | Dermatitis<br>[1.43] | Neonatal<br>[1.06]   | Congenital<br>[0.69] | Asthma<br>[1.18] | URI<br>[1.26] | Skin Viral<br>[0.88] | Diarrhea<br>[0.92]   | Endocrine<br>[1.07]  | Iron<br>[7.49]       | ASD<br>[1.1]        |
| Bristol              | Dermatitis<br>[1.43] | Neonatal<br>[1.25]   | Congenital<br>[0.75] | Asthma<br>[1.27] | URI<br>[1.28] | Skin Viral<br>[0.9]  | ASD<br>[1.31]        | Diarrhea<br>[0.92]   | Endocrine<br>[0.98]  | Epilepsy<br>[1.02]  |
| Cornwall             | Dermatitis<br>[1.44] | Neonatal<br>[1.0]    | Congenital<br>[0.5]  | Asthma<br>[1.05] | URI<br>[1.29] | Diarrhea<br>[0.81]   | Iron<br>[5.03]       | Skin Viral<br>[0.84] | ASD<br>[1.11]        | Endocrine<br>[0.79] |
| Devon                | Dermatitis<br>[1.44] | Neonatal<br>[0.94]   | Congenital<br>[0.59] | Asthma<br>[1.1]  | URI<br>[1.3]  | Iron<br>[7.6]        | Diarrhea<br>[0.86]   | Skin Viral<br>[0.85] | Endocrine<br>[0.89]  | ASD<br>[1.11]       |
| Dorset               | Dermatitis<br>[1.44] | Neonatal<br>[1.0]    | Congenital<br>[0.61] | Asthma<br>[1.09] | URI<br>[1.3]  | Diarrhea<br>[0.8]    | Skin Viral<br>[0.85] | Endocrine<br>[0.93]  | ASD<br>[1.1]         | Other MN<br>[1.13]  |
| Gloucestershire      | Dermatitis<br>[1.43] | Neonatal<br>[0.97]   | Congenital<br>[0.59] | Asthma<br>[1.14] | URI<br>[1.28] | Iron<br>[9.51]       | Diarrhea<br>[0.94]   | Skin Viral<br>[0.87] | ASD<br>[1.1]         | Endocrine<br>[0.83] |
| N Somerset           | Dermatitis<br>[1.44] | Neonatal<br>[1.11]   | Congenital<br>[0.62] | Asthma<br>[1.1]  | URI<br>[1.29] | Skin Viral<br>[0.85] | ASD<br>[1.32]        | Diarrhea<br>[0.73]   | Endocrine<br>[0.72]  | Epilepsy<br>[0.81]  |
| Plymouth             | Dermatitis<br>[1.44] | Neonatal<br>[1.03]   | Congenital<br>[0.67] | Asthma<br>[1.11] | URI<br>[1.26] | Diarrhea<br>[0.9]    | Skin Viral<br>[0.85] | Endocrine<br>[0.96]  | ASD<br>[1.1]         | LRI<br>[0.71]       |
| Poole                | Dermatitis<br>[1.43] | Neonatal<br>[1.07]   | Congenital<br>[0.84] | Asthma<br>[1.15] | URI<br>[1.33] | LRI<br>[1.14]        | Endocrine<br>[1.18]  | Diarrhea<br>[0.88]   | Skin Viral<br>[0.86] | Other MN<br>[1.49]  |
| Somerset             | Dermatitis<br>[1.44] | Neonatal<br>[1.04]   | Congenital<br>[0.54] | Asthma<br>[1.06] | URI<br>[1.33] | Iron<br>[6.08]       | Diarrhea<br>[0.78]   | Skin Viral<br>[0.84] | Endocrine<br>[0.87]  | ASD<br>[1.1]        |
| S Gloucestershire    | Dermatitis<br>[1.43] | Neonatal<br>[1.11]   | Congenital<br>[0.67] | Asthma<br>[1.2]  | URI<br>[1.29] | Skin Viral<br>[0.88] | ASD<br>[1.3]         | Diarrhea<br>[0.79]   | Endocrine<br>[0.8]   | Other MN<br>[1.22]  |
| Swindon              | Dermatitis<br>[1.44] | Neonatal<br>[0.8]    | Congenital<br>[0.63] | Asthma<br>[1.15] | URI<br>[1.38] | Skin Viral<br>[0.86] | Diarrhea<br>[0.87]   | LRI<br>[0.9]         | ASD<br>[1.11]        | Endocrine<br>[0.79] |
| Torbay               | Dermatitis<br>[1.46] | Neonatal<br>[0.84]   | Congenital<br>[0.55] | Asthma<br>[1.02] | URI<br>[1.32] | Iron<br>[4.39]       | Endocrine<br>[1.05]  | Skin Viral<br>[0.83] | Diarrhea<br>[0.67]   | ASD<br>[1.09]       |
| Wiltshire            | Dermatitis<br>[1.44] | Neonatal<br>[1.15]   | Congenital<br>[0.57] | Asthma<br>[1.1]  | URI<br>[1.32] | Skin Viral<br>[0.85] | Diarrhea<br>[0.77]   | ASD<br>[1.1]         | Endocrine<br>[0.79]  | LRI<br>[0.59]       |
| W Midlands           | Dermatitis<br>[1.44] | Neonatal<br>[1.0]    | Congenital<br>[0.72] | Asthma<br>[1.13] | URI<br>[1.3]  | Diarrhea<br>[0.92]   | Endocrine<br>[1.15]  | Skin Viral<br>[0.85] | LRI<br>[0.77]        | Epilepsy<br>[0.93]  |
| Birmingham           | Dermatitis<br>[1.44] | Congenital<br>[0.81] | Neonatal<br>[1.02]   | Asthma<br>[1.16] | URI<br>[1.27] | Endocrine<br>[1.38]  | Diarrhea<br>[0.98]   | LRI<br>[1.04]        | Skin Viral<br>[0.86] | Falls<br>[0.84]     |

**eFigure 7c. Leading ten causes of DALYs with the ratio of observed DALYs to DALYs expected on the basis of Socio-Demographic Index alone in 2017, 1-4 years, both sexes combined.** The top ten causes contributing to DALYs are listed globally, by socio-demographic quintile, and then by GBD superregion, region, country, and subnationally where modeled. For each cell, the ratio of observed DALYs to DALYs expected on the basis of socio-demographic index (SDI) alone are listed. Abbreviations: DALY=disability-adjusted life year, GBD=Global Burden of Disease.

Values shown in brackets represent the ratio of observed DALYs to predicted DALYs on the basis of Socio-Demographic Index (SDI), rounded to two (2) digits. Color ranges (shown below) were calculated to place a roughly equal number of cells into each bin.

| COLOR KEY:            |                      | [0.0-0.5]            | [0.5-0.72]           | [0.72-0.86]      | [0.86-0.97]   | [0.97-1.1]           | [1.1-1.23]           | [1.23-1.41]          | [1.41-2.15]          | 2.15+                |
|-----------------------|----------------------|----------------------|----------------------|------------------|---------------|----------------------|----------------------|----------------------|----------------------|----------------------|
|                       | 1                    | 2                    | 3                    | 4                | 5             | 6                    | 7                    | 8                    | 9                    | 10                   |
| Coventry              | Dermatitis<br>[1.43] | Neonatal<br>[0.98]   | Congenital<br>[0.78] | Asthma<br>[1.2]  | URI<br>[1.28] | Endocrine<br>[1.22]  | Diarrhea<br>[0.9]    | Skin Viral<br>[0.86] | LRI<br>[0.94]        | Epilepsy<br>[1.09]   |
| Dudley                | Dermatitis<br>[1.45] | Neonatal<br>[1.05]   | Congenital<br>[0.67] | Asthma<br>[1.06] | URI<br>[1.31] | Endocrine<br>[1.19]  | Diarrhea<br>[0.86]   | LRI<br>[0.54]        | Skin Viral<br>[0.84] | Epilepsy<br>[0.88]   |
| Herefordshire         | Dermatitis<br>[1.43] | Neonatal<br>[1.02]   | Congenital<br>[0.71] | Asthma<br>[1.13] | URI<br>[1.29] | Diarrhea<br>[0.93]   | Endocrine<br>[1.09]  | Skin Viral<br>[0.85] | ASD<br>[1.11]        | Other MN<br>[1.19]   |
| Sandwell              | Dermatitis<br>[1.45] | Neonatal<br>[1.02]   | Congenital<br>[0.58] | Asthma<br>[1.06] | URI<br>[1.32] | Endocrine<br>[1.18]  | Diarrhea<br>[0.84]   | Skin Viral<br>[0.83] | LRI<br>[0.46]        | ASD<br>[1.1]         |
| Shropshire            | Dermatitis<br>[1.44] | Congenital<br>[0.81] | Neonatal<br>[1.0]    | Asthma<br>[1.12] | URI<br>[1.31] | Diarrhea<br>[0.87]   | LRI<br>[0.84]        | Skin Viral<br>[0.85] | Other MN<br>[1.33]   | Endocrine<br>[0.92]  |
| Solihull              | Dermatitis<br>[1.43] | Congenital<br>[0.86] | Neonatal<br>[0.79]   | Asthma<br>[1.19] | URI<br>[1.35] | Diarrhea<br>[0.92]   | Skin Viral<br>[0.87] | Endocrine<br>[1.09]  | Other MN<br>[1.57]   | LRI<br>[1.01]        |
| Staffordshire         | Dermatitis<br>[1.44] | Neonatal<br>[0.96]   | Congenital<br>[0.63] | Asthma<br>[1.1]  | URI<br>[1.31] | Diarrhea<br>[0.96]   | Skin Viral<br>[0.85] | Endocrine<br>[0.93]  | ASD<br>[1.04]        | Falls<br>[0.75]      |
| Stoke-on-Trent        | Dermatitis<br>[1.45] | Neonatal<br>[1.15]   | Congenital<br>[0.73] | Asthma<br>[1.08] | URI<br>[1.27] | Diarrhea<br>[0.92]   | Endocrine<br>[1.1]   | LRI<br>[0.61]        | Skin Viral<br>[0.84] | Falls<br>[0.92]      |
| Telford & Wrekin      | Dermatitis<br>[1.44] | Neonatal<br>[1.01]   | Congenital<br>[0.72] | Asthma<br>[1.11] | URI<br>[1.33] | Diarrhea<br>[0.86]   | LRI<br>[0.73]        | Endocrine<br>[1.01]  | Skin Viral<br>[0.84] | Iron<br>[5.17]       |
| Walsall               | Dermatitis<br>[1.45] | Neonatal<br>[0.97]   | Congenital<br>[0.62] | Asthma<br>[1.05] | URI<br>[1.3]  | Endocrine<br>[1.23]  | LRI<br>[0.53]        | Diarrhea<br>[0.73]   | Skin Viral<br>[0.83] | ASD<br>[1.1]         |
| Warwickshire          | Dermatitis<br>[1.43] | Neonatal<br>[1.02]   | Congenital<br>[0.68] | Asthma<br>[1.19] | URI<br>[1.29] | Skin Viral<br>[0.87] | Diarrhea<br>[0.91]   | Endocrine<br>[0.94]  | ASD<br>[1.1]         | LRI<br>[0.81]        |
| Wolverhampton         | Dermatitis<br>[1.45] | Congenital<br>[0.62] | Neonatal<br>[0.75]   | Asthma<br>[1.08] | URI<br>[1.33] | Diarrhea<br>[0.93]   | Endocrine<br>[1.14]  | Skin Viral<br>[0.84] | LRI<br>[0.62]        | ASD<br>[1.09]        |
| Worcestershire        | Dermatitis<br>[1.43] | Neonatal<br>[1.09]   | Congenital<br>[0.68] | Asthma<br>[1.13] | URI<br>[1.36] | Skin Viral<br>[0.85] | Endocrine<br>[1.04]  | Diarrhea<br>[0.83]   | LRI<br>[0.75]        | ASD<br>[1.11]        |
| Yorkshire & Humber    | Dermatitis<br>[1.44] | Neonatal<br>[0.95]   | Congenital<br>[0.7]  | Asthma<br>[1.14] | URI<br>[1.3]  | Diarrhea<br>[0.92]   | Skin Viral<br>[0.85] | Endocrine<br>[1.0]   | LRI<br>[0.76]        | ASD<br>[1.1]         |
| Barnsley              | Dermatitis<br>[1.46] | Neonatal<br>[0.97]   | Congenital<br>[0.6]  | Asthma<br>[1.06] | URI<br>[1.3]  | Diarrhea<br>[0.83]   | LRI<br>[0.49]        | Skin Viral<br>[0.83] | Endocrine<br>[0.88]  | Epilepsy<br>[0.84]   |
| Bradford              | Dermatitis<br>[1.45] | Congenital<br>[0.74] | Neonatal<br>[1.02]   | Asthma<br>[1.11] | URI<br>[1.29] | LRI<br>[0.76]        | Endocrine<br>[1.2]   | Diarrhea<br>[0.85]   | Skin Viral<br>[0.84] | Epilepsy<br>[0.89]   |
| Calderdale            | Dermatitis<br>[1.44] | Congenital<br>[0.85] | Neonatal<br>[0.96]   | Asthma<br>[1.14] | URI<br>[1.34] | LRI<br>[1.1]         | Endocrine<br>[1.37]  | Diarrhea<br>[0.95]   | Other MN<br>[1.55]   | Skin Viral<br>[0.85] |
| Doncaster             | Dermatitis<br>[1.46] | Neonatal<br>[1.12]   | Congenital<br>[0.55] | Asthma<br>[1.05] | URI<br>[1.33] | Diarrhea<br>[0.78]   | Skin Viral<br>[0.83] | LRI<br>[0.41]        | Endocrine<br>[0.8]   | ASD<br>[1.1]         |
| E Riding of Yorkshire | Dermatitis<br>[1.44] | Neonatal<br>[0.91]   | Congenital<br>[0.64] | Asthma<br>[1.1]  | URI<br>[1.28] | Diarrhea<br>[0.82]   | Skin Viral<br>[0.84] | ASD<br>[1.11]        | Endocrine<br>[0.83]  | LRI<br>[0.56]        |
| Kingston upon Hull    | Dermatitis<br>[1.44] | Neonatal<br>[0.87]   | Congenital<br>[0.63] | Asthma<br>[1.12] | URI<br>[1.28] | Diarrhea<br>[0.85]   | Skin Viral<br>[0.84] | LRI<br>[0.66]        | Endocrine<br>[0.92]  | Epilepsy<br>[0.96]   |
| Kirklees              | Dermatitis<br>[1.45] | Congenital<br>[0.7]  | Neonatal<br>[0.89]   | Asthma<br>[1.11] | URI<br>[1.31] | Diarrhea<br>[0.9]    | LRI<br>[0.73]        | Endocrine<br>[1.1]   | Skin Viral<br>[0.84] | Iron<br>[4.88]       |
| Leeds                 | Dermatitis<br>[1.43] | Neonatal<br>[0.91]   | Congenital<br>[0.74] | Asthma<br>[1.24] | URI<br>[1.31] | Skin Viral<br>[0.89] | Diarrhea<br>[0.97]   | Endocrine<br>[1.02]  | ASD<br>[1.1]         | LRI<br>[1.02]        |
| NE Lincolnshire       | Dermatitis<br>[1.45] | Congenital<br>[0.7]  | Neonatal<br>[0.92]   | Asthma<br>[1.1]  | URI<br>[1.3]  | LRI<br>[0.72]        | Endocrine<br>[1.16]  | Skin Viral<br>[0.84] | Diarrhea<br>[0.7]    | Epilepsy<br>[0.9]    |
| N Lincolnshire        | Dermatitis<br>[1.44] | Neonatal<br>[0.84]   | Congenital<br>[0.6]  | Asthma<br>[1.1]  | URI<br>[1.3]  | Diarrhea<br>[0.79]   | Skin Viral<br>[0.84] | LRI<br>[0.54]        | Endocrine<br>[0.86]  | ASD<br>[1.1]         |
| N Yorkshire           | Dermatitis<br>[1.43] | Neonatal<br>[1.05]   | Congenital<br>[0.7]  | Asthma<br>[1.15] | URI<br>[1.3]  | Diarrhea<br>[1.0]    | Skin Viral<br>[0.86] | Endocrine<br>[0.94]  | Other MN<br>[1.3]    | ASD<br>[1.11]        |
| Rotherham             | Dermatitis<br>[1.45] | Neonatal<br>[0.83]   | Congenital<br>[0.56] | Asthma<br>[1.06] | URI<br>[1.29] | Diarrhea<br>[0.76]   | Skin Viral<br>[0.83] | LRI<br>[0.45]        | ASD<br>[1.11]        | Endocrine<br>[0.77]  |
| Sheffield             | Dermatitis<br>[1.43] | Neonatal<br>[1.01]   | Congenital<br>[0.74] | Asthma<br>[1.19] | URI<br>[1.29] | Diarrhea<br>[1.01]   | Skin Viral<br>[0.87] | Endocrine<br>[0.99]  | ASD<br>[1.11]        | Iron<br>[6.22]       |
| Wakefield             | Dermatitis<br>[1.45] | Neonatal<br>[0.74]   | Congenital<br>[0.51] | Asthma<br>[1.09] | URI<br>[1.29] | Diarrhea<br>[0.91]   | Skin Viral<br>[0.84] | ASD<br>[1.1]         | Endocrine<br>[0.8]   | LRI<br>[0.45]        |
| York                  | Dermatitis<br>[1.43] | Congenital<br>[0.91] | Neonatal<br>[0.94]   | Asthma<br>[1.28] | URI<br>[1.34] | Diarrhea<br>[1.05]   | Skin Viral<br>[0.9]  | Other MN<br>[1.81]   | LRI<br>[1.48]        | ASD<br>[1.1]         |
| N Ireland             | Dermatitis<br>[1.19] | Neonatal<br>[0.87]   | Congenital<br>[0.63] | Asthma<br>[1.01] | URI<br>[1.31] | Skin Viral<br>[0.94] | Diarrhea<br>[0.75]   | Endocrine<br>[0.85]  | ASD<br>[1.03]        | Falls<br>[0.71]      |
| Scotland              | Dermatitis<br>[1.29] | Congenital<br>[0.61] | Neonatal<br>[0.8]    | Asthma<br>[1.02] | URI<br>[1.31] | Skin Viral<br>[0.91] | Diarrhea<br>[0.64]   | Endocrine<br>[0.82]  | ASD<br>[1.04]        | Epilepsy<br>[0.79]   |

**eFigure 7c. Leading ten causes of DALYs with the ratio of observed DALYs to DALYs expected on the basis of Socio-Demographic Index alone in 2017, 1-4 years, both sexes combined.** The top ten causes contributing to DALYs are listed globally, by socio-demographic quintile, and then by GBD superregion, region, country, and subnationally where modeled. For each cell, the ratio of observed DALYs to DALYs expected on the basis of socio-demographic index (SDI) alone are listed. Abbreviations: DALY=disability-adjusted life year, GBD=Global Burden of Disease.

Values shown in brackets represent the ratio of observed DALYs to predicted DALYs on the basis of Socio-Demographic Index (SDI), rounded to two (2) digits. Color ranges (shown below) were calculated to place a roughly equal number of cells into each bin.

| COLOR KEY:                  |                       | [0.0-0.5]            | [0.5-0.72]           | [0.72-0.86]          | [0.86-0.97]          | [0.97-1.1]           | [1.1-1.23]           | [1.23-1.41]          | [1.41-2.15]          | 2.15+                |
|-----------------------------|-----------------------|----------------------|----------------------|----------------------|----------------------|----------------------|----------------------|----------------------|----------------------|----------------------|
|                             | 1                     | 2                    | 3                    | 4                    | 5                    | 6                    | 7                    | 8                    | 9                    | 10                   |
| Wales                       | Dermatitis<br>[1.21]  | Neonatal<br>[0.8]    | Congenital<br>[0.53] | Asthma<br>[1.01]     | URI<br>[1.32]        | Skin Viral<br>[1.02] | Diarrhea<br>[0.68]   | Endocrine<br>[0.73]  | ASD<br>[0.98]        | Falls<br>[0.69]      |
| Latin America and Caribbean | LRI<br>[0.52]         | Diarrhea<br>[1.35]   | Congenital<br>[0.49] | Neonatal<br>[1.0]    | Asthma<br>[1.27]     | Road Inj<br>[0.55]   | Dermatitis<br>[0.88] | HIV<br>[3.21]        | Drown<br>[0.37]      | PEM<br>[2.45]        |
| Andean Latin America        | HIV<br>[13.61]        | LRI<br>[0.68]        | Congenital<br>[0.44] | Diarrhea<br>[1.02]   | Neonatal<br>[0.9]    | Dermatitis<br>[1.43] | Asthma<br>[1.55]     | Road Inj<br>[0.72]   | F Body<br>[1.31]     | Iron<br>[1.92]       |
| Bolivia                     | LRI<br>[0.65]         | HIV<br>[9.5]         | Congenital<br>[0.5]  | Diarrhea<br>[0.72]   | Iron<br>[2.5]        | Asthma<br>[1.65]     | Road Inj<br>[0.77]   | Neonatal<br>[0.85]   | Dermatitis<br>[1.53] | F Body<br>[1.34]     |
| Ecuador                     | LRI<br>[0.94]         | Congenital<br>[0.66] | Road Inj<br>[1.1]    | Diarrhea<br>[1.06]   | Neonatal<br>[0.97]   | Dermatitis<br>[1.3]  | Asthma<br>[1.47]     | Drown<br>[0.61]      | F Body<br>[0.99]     | Leukemia<br>[0.92]   |
| Peru                        | HIV<br>[19.81]        | LRI<br>[0.47]        | Diarrhea<br>[0.96]   | Neonatal<br>[0.88]   | Dermatitis<br>[1.47] | Asthma<br>[1.48]     | Congenital<br>[0.3]  | F Body<br>[1.37]     | Iron<br>[2.1]        | Road Inj<br>[0.49]   |
| Caribbean                   | Diarrhea<br>[3.8]     | LRI<br>[1.19]        | Congenital<br>[0.89] | Road Inj<br>[1.5]    | Asthma<br>[2.83]     | Whooping<br>[15.1]   | Drown<br>[0.92]      | Neonatal<br>[0.89]   | Meningitis<br>[0.96] | PEM<br>[5.48]        |
| Antigua                     | LRI<br>[1.63]         | Congenital<br>[0.78] | Asthma<br>[2.37]     | Neonatal<br>[0.96]   | Drown<br>[1.04]      | Dermatitis<br>[1.03] | Iron<br>[4.03]       | Endocrine<br>[2.34]  | Diarrhea<br>[1.13]   | PEM<br>[15.54]       |
| Bahamas                     | Asthma<br>[2.59]      | LRI<br>[1.51]        | Congenital<br>[0.6]  | Neonatal<br>[0.97]   | Dermatitis<br>[1.01] | Endocrine<br>[2.8]   | Drown<br>[1.07]      | Diarrhea<br>[1.17]   | HIV<br>[7.04]        | Road Inj<br>[0.49]   |
| Barbados                    | Asthma<br>[2.18]      | Neonatal<br>[0.94]   | Dermatitis<br>[1.0]  | Congenital<br>[0.39] | LRI<br>[0.57]        | Diarrhea<br>[0.92]   | Urticaria<br>[1.03]  | Endocrine<br>[0.99]  | Skin Viral<br>[0.81] | URI<br>[0.84]        |
| Belize                      | LRI<br>[0.32]         | Asthma<br>[1.86]     | Congenital<br>[0.36] | Neonatal<br>[0.87]   | Dermatitis<br>[1.19] | Drown<br>[0.43]      | Diarrhea<br>[0.4]    | PEM<br>[1.66]        | Iron<br>[1.18]       | Road Inj<br>[0.35]   |
| Bermuda                     | Asthma<br>[3.23]      | Congenital<br>[0.75] | Neonatal<br>[1.02]   | Dermatitis<br>[0.98] | LRI<br>[1.42]        | Drown<br>[1.26]      | Diarrhea<br>[1.45]   | Endocrine<br>[1.73]  | Leukemia<br>[1.2]    | Road Inj<br>[0.55]   |
| Cuba                        | Asthma<br>[2.17]      | Congenital<br>[0.4]  | Neonatal<br>[0.79]   | Dermatitis<br>[1.06] | LRI<br>[0.28]        | Iron<br>[1.55]       | Diarrhea<br>[0.42]   | Urticaria<br>[0.94]  | Drown<br>[0.26]      | Leukemia<br>[0.54]   |
| Dominica                    | Congenital<br>[0.97]  | LRI<br>[1.25]        | Asthma<br>[2.61]     | Neonatal<br>[1.13]   | Drown<br>[0.92]      | Dermatitis<br>[1.07] | Endocrine<br>[2.55]  | Road Inj<br>[0.66]   | Diarrhea<br>[0.96]   | Leukemia<br>[1.23]   |
| Dominican Rep               | Congenital<br>[0.5]   | LRI<br>[0.32]        | Diarrhea<br>[0.72]   | Neonatal<br>[0.84]   | Asthma<br>[1.39]     | Whooping<br>[4.01]   | Road Inj<br>[0.57]   | Dermatitis<br>[1.2]  | Violence<br>[1.73]   | Meningitis<br>[0.29] |
| Grenada                     | LRI<br>[0.41]         | Neonatal<br>[0.89]   | Asthma<br>[1.74]     | Congenital<br>[0.32] | Dermatitis<br>[1.11] | Iron<br>[2.28]       | Diarrhea<br>[0.51]   | Drown<br>[0.33]      | Endocrine<br>[1.17]  | Vit A<br>[0.78]      |
| Guyana                      | LRI<br>[0.23]         | Neonatal<br>[0.93]   | Asthma<br>[1.63]     | Diarrhea<br>[0.51]   | Congenital<br>[0.31] | PEM<br>[2.0]         | Dermatitis<br>[1.2]  | Drown<br>[0.33]      | Iron<br>[1.11]       | Endocrine<br>[1.27]  |
| Haiti                       | Diarrhea<br>[0.69]    | LRI<br>[0.46]        | Congenital<br>[0.8]  | Road Inj<br>[1.53]   | Whooping<br>[1.27]   | Drown<br>[0.72]      | Asthma<br>[2.23]     | Meningitis<br>[0.45] | PEM<br>[0.5]         | Iron<br>[1.47]       |
| Jamaica                     | Neonatal<br>[1.43]    | Congenital<br>[0.64] | Asthma<br>[2.16]     | Dermatitis<br>[1.07] | LRI<br>[0.28]        | Iron<br>[2.02]       | Diarrhea<br>[0.57]   | HIV<br>[3.42]        | Vit A<br>[0.98]      | Violence<br>[1.44]   |
| Puerto Rico                 | Disaster<br>[7969.54] | Asthma<br>[3.91]     | Neonatal<br>[1.0]    | Dermatitis<br>[0.97] | Congenital<br>[0.48] | Diarrhea<br>[1.32]   | Urticaria<br>[1.19]  | Endocrine<br>[1.02]  | Skin Viral<br>[0.83] | Road Inj<br>[0.44]   |
| St Lucia                    | Asthma<br>[1.99]      | Neonatal<br>[0.9]    | Dermatitis<br>[1.1]  | Congenital<br>[0.27] | Diarrhea<br>[0.66]   | LRI<br>[0.23]        | Drown<br>[0.22]      | Urticaria<br>[0.91]  | Endocrine<br>[0.79]  | Epilepsy<br>[0.66]   |
| St Vincent                  | Asthma<br>[1.71]      | Neonatal<br>[0.85]   | Congenital<br>[0.29] | LRI<br>[0.2]         | Dermatitis<br>[1.17] | Diarrhea<br>[0.36]   | PEM<br>[1.87]        | Vit A<br>[0.93]      | Endocrine<br>[1.39]  | Drown<br>[0.23]      |
| Suriname                    | Asthma<br>[2.06]      | Congenital<br>[0.41] | Neonatal<br>[0.96]   | LRI<br>[0.39]        | Diarrhea<br>[0.87]   | Dermatitis<br>[1.12] | Drown<br>[0.45]      | HIV<br>[3.02]        | Road Inj<br>[0.37]   | PEM<br>[2.44]        |
| Trinidad Tobago             | Congenital<br>[0.75]  | Asthma<br>[2.54]     | Neonatal<br>[0.97]   | Dermatitis<br>[1.05] | LRI<br>[0.48]        | Road Inj<br>[0.55]   | Diarrhea<br>[0.77]   | Endocrine<br>[1.41]  | Violence<br>[1.87]   | F Body<br>[0.93]     |
| Virgin Isl US               | Asthma<br>[2.88]      | Neonatal<br>[1.02]   | Congenital<br>[0.67] | Dermatitis<br>[0.98] | Diarrhea<br>[1.62]   | Disaster<br>[568.38] | Endocrine<br>[1.57]  | LRI<br>[0.91]        | Drown<br>[0.74]      | Urticaria<br>[1.17]  |
| Central Latin America       | Diarrhea<br>[1.22]    | Congenital<br>[0.49] | LRI<br>[0.42]        | Neonatal<br>[1.15]   | Road Inj<br>[0.45]   | Dermatitis<br>[0.78] | Asthma<br>[0.81]     | PEM<br>[2.16]        | Violence<br>[1.61]   | Drown<br>[0.28]      |
| Colombia                    | Neonatal<br>[1.18]    | Congenital<br>[0.41] | LRI<br>[0.33]        | Diarrhea<br>[0.82]   | Drown<br>[0.47]      | Dermatitis<br>[0.86] | PEM<br>[3.12]        | Asthma<br>[0.83]     | Road Inj<br>[0.35]   | Epilepsy<br>[1.07]   |
| Costa Rica                  | Neonatal<br>[1.05]    | Congenital<br>[0.38] | Diarrhea<br>[0.93]   | Asthma<br>[1.19]     | Dermatitis<br>[0.81] | LRI<br>[0.13]        | Epilepsy<br>[0.84]   | Road Inj<br>[0.26]   | Drown<br>[0.22]      | Urticaria<br>[0.91]  |
| El Salvador                 | HIV<br>[12.7]         | Neonatal<br>[1.06]   | Diarrhea<br>[0.46]   | Congenital<br>[0.22] | Asthma<br>[0.9]      | Dermatitis<br>[0.82] | LRI<br>[0.11]        | Vit A<br>[0.53]      | Whooping<br>[1.26]   | Epilepsy<br>[0.67]   |
| Guatemala                   | LRI<br>[0.83]         | Diarrhea<br>[1.32]   | Congenital<br>[0.39] | Neonatal<br>[1.03]   | PEM<br>[1.09]        | F Body<br>[0.93]     | Dermatitis<br>[1.01] | Asthma<br>[0.66]     | Iron<br>[0.66]       | Road Inj<br>[0.25]   |
| Honduras                    | Diarrhea<br>[0.29]    | Neonatal<br>[1.11]   | Asthma<br>[1.06]     | Violence<br>[1.72]   | Congenital<br>[0.15] | Dermatitis<br>[1.01] | Endocrine<br>[1.67]  | Whooping<br>[0.55]   | Leukemia<br>[0.79]   | LRI<br>[0.05]        |

**eFigure 7c. Leading ten causes of DALYs with the ratio of observed DALYs to DALYs expected on the basis of Socio-Demographic Index alone in 2017, 1-4 years, both sexes combined.** The top ten causes contributing to DALYs are listed globally, by socio-demographic quintile, and then by GBD superregion, region, country, and subnationally where modeled. For each cell, the ratio of observed DALYs to DALYs expected on the basis of socio-demographic index (SDI) alone are listed. Abbreviations: DALY=disability-adjusted life year, GBD=Global Burden of Disease.

Values shown in brackets represent the ratio of observed DALYs to predicted DALYs on the basis of Socio-Demographic Index (SDI), rounded to two (2) digits. Color ranges (shown below) were calculated to place a roughly equal number of cells into each bin.

| COLOR KEY:      |                      | [0.0-0.5]            | [0.5-0.72]           | [0.72-0.86]        | [0.86-0.97]         | [0.97-1.1]           | [1.1-1.23]           | [1.23-1.41]          | [1.41-2.15]          | 2.15+                |
|-----------------|----------------------|----------------------|----------------------|--------------------|---------------------|----------------------|----------------------|----------------------|----------------------|----------------------|
|                 | 1                    | 2                    | 3                    | 4                  | 5                   | 6                    | 7                    | 8                    | 9                    | 10                   |
| Mexico          | Congenital<br>[0.57] | Neonatal<br>[1.17]   | Diarrhea<br>[0.79]   | LRI<br>[0.26]      | Road Inj<br>[0.54]  | Violence<br>[2.1]    | Epilepsy<br>[1.24]   | Dermatitis<br>[0.65] | Asthma<br>[0.67]     | Vit A<br>[0.88]      |
| Aguascalientes  | Congenital<br>[0.58] | Neonatal<br>[1.18]   | Diarrhea<br>[0.86]   | Road Inj<br>[0.63] | LRI<br>[0.2]        | Asthma<br>[0.8]      | Dermatitis<br>[0.64] | Epilepsy<br>[1.29]   | F Body<br>[0.8]      | Violence<br>[1.6]    |
| Baja CA         | Neonatal<br>[1.13]   | Congenital<br>[0.41] | Violence<br>[2.13]   | F Body<br>[0.94]   | Diarrhea<br>[0.54]  | Road Inj<br>[0.41]   | Dermatitis<br>[0.64] | LRI<br>[0.18]        | Epilepsy<br>[1.09]   | Vit A<br>[0.92]      |
| Baja CA Sur     | Neonatal<br>[1.2]    | Congenital<br>[0.43] | Diarrhea<br>[0.79]   | Road Inj<br>[0.52] | LRI<br>[0.21]       | Dermatitis<br>[0.64] | Violence<br>[1.87]   | Vit A<br>[1.12]      | Asthma<br>[0.74]     | Epilepsy<br>[1.13]   |
| Campeche        | Neonatal<br>[1.22]   | Congenital<br>[0.43] | Diarrhea<br>[0.55]   | LRI<br>[0.16]      | Road Inj<br>[0.38]  | Vit A<br>[0.95]      | Dermatitis<br>[0.67] | Violence<br>[1.57]   | Asthma<br>[0.65]     | Drown<br>[0.24]      |
| Chiapas         | Diarrhea<br>[0.52]   | LRI<br>[0.2]         | Congenital<br>[0.36] | Neonatal<br>[1.1]  | Vit A<br>[0.76]     | PEM<br>[0.51]        | Epilepsy<br>[1.12]   | Dermatitis<br>[0.72] | Leukemia<br>[0.67]   | Asthma<br>[0.52]     |
| Chihuahua       | Congenital<br>[0.65] | Neonatal<br>[1.15]   | Road Inj<br>[0.97]   | Diarrhea<br>[0.36] | Diarrhea<br>[0.87]  | Violence<br>[3.29]   | F Body<br>[1.46]     | Drown<br>[0.39]      | Epilepsy<br>[1.38]   | Asthma<br>[0.81]     |
| Coahuila        | Congenital<br>[0.6]  | Neonatal<br>[1.03]   | Diarrhea<br>[0.83]   | Road Inj<br>[0.6]  | LRI<br>[0.21]       | Violence<br>[1.92]   | F Body<br>[0.87]     | Asthma<br>[0.77]     | Dermatitis<br>[0.65] | Epilepsy<br>[1.23]   |
| Colima          | Neonatal<br>[1.24]   | Congenital<br>[0.51] | Diarrhea<br>[0.73]   | Road Inj<br>[0.55] | Violence<br>[2.31]  | LRI<br>[0.22]        | Dermatitis<br>[0.64] | Asthma<br>[0.73]     | Epilepsy<br>[1.22]   | Drown<br>[0.33]      |
| Mexico City     | Congenital<br>[0.92] | Neonatal<br>[1.33]   | LRI<br>[0.75]        | Diarrhea<br>[1.24] | Violence<br>[3.12]  | Dermatitis<br>[0.77] | Epilepsy<br>[1.62]   | Road Inj<br>[0.54]   | Leukemia<br>[1.04]   | Vit A<br>[1.26]      |
| Durango         | Congenital<br>[0.56] | Neonatal<br>[1.08]   | Road Inj<br>[0.75]   | Diarrhea<br>[0.58] | LRI<br>[0.2]        | Violence<br>[2.38]   | Dermatitis<br>[0.86] | F Body<br>[0.86]     | Asthma<br>[0.76]     | Drown<br>[0.3]       |
| Guanajuato      | Congenital<br>[0.45] | Neonatal<br>[1.02]   | Diarrhea<br>[0.49]   | Road Inj<br>[0.52] | LRI<br>[0.15]       | Vit A<br>[0.99]      | Dermatitis<br>[0.67] | Asthma<br>[0.71]     | Epilepsy<br>[1.13]   | Violence<br>[1.5]    |
| Guerrero        | Congenital<br>[0.74] | Diarrhea<br>[0.59]   | LRI<br>[0.25]        | Neonatal<br>[1.27] | Violence<br>[3.77]  | Road Inj<br>[0.82]   | PEM<br>[1.16]        | Drown<br>[0.35]      | F Body<br>[0.95]     | Leukemia<br>[1.01]   |
| Hidalgo         | Neonatal<br>[1.31]   | Congenital<br>[0.35] | Diarrhea<br>[0.27]   | LRI<br>[0.1]       | Dermatitis<br>[0.7] | Epilepsy<br>[1.08]   | Road Inj<br>[0.3]    | Asthma<br>[0.6]      | Violence<br>[1.32]   | F Body<br>[0.5]      |
| Jalisco         | Congenital<br>[0.55] | Neonatal<br>[1.13]   | Road Inj<br>[0.7]    | Diarrhea<br>[0.64] | LRI<br>[0.21]       | Violence<br>[1.93]   | Epilepsy<br>[1.36]   | Dermatitis<br>[0.65] | Vit A<br>[0.95]      | Drown<br>[0.31]      |
| Mexico          | Neonatal<br>[1.33]   | Congenital<br>[0.46] | Diarrhea<br>[0.66]   | LRI<br>[0.19]      | Violence<br>[2.18]  | Vit A<br>[1.23]      | Road Inj<br>[0.38]   | Iron<br>[1.25]       | Epilepsy<br>[1.11]   | Dermatitis<br>[0.57] |
| Michoacan       | Congenital<br>[0.56] | Neonatal<br>[1.02]   | Road Inj<br>[0.76]   | LRI<br>[0.19]      | Diarrhea<br>[0.39]  | Violence<br>[2.21]   | Drown<br>[0.35]      | F Body<br>[0.81]     | Asthma<br>[0.67]     | Leukemia<br>[0.75]   |
| Morelos         | Congenital<br>[0.56] | Neonatal<br>[1.13]   | Diarrhea<br>[0.61]   | Violence<br>[2.32] | LRI<br>[0.18]       | Road Inj<br>[0.42]   | Epilepsy<br>[1.2]    | Disaster<br>[126.68] | Dermatitis<br>[0.56] | Asthma<br>[0.63]     |
| Nayarit         | Congenital<br>[0.5]  | Neonatal<br>[1.23]   | Road Inj<br>[0.71]   | Diarrhea<br>[0.59] | LRI<br>[0.2]        | Violence<br>[2.17]   | Drown<br>[0.32]      | Dermatitis<br>[0.67] | Asthma<br>[0.7]      | Epilepsy<br>[1.14]   |
| Nuevo Leon      | Congenital<br>[0.55] | Neonatal<br>[0.97]   | Diarrhea<br>[0.78]   | LRI<br>[0.24]      | Violence<br>[2.03]  | Road Inj<br>[0.45]   | Dermatitis<br>[0.54] | Epilepsy<br>[1.18]   | F Body<br>[0.8]      | Asthma<br>[0.6]      |
| Oaxaca          | Congenital<br>[0.86] | Diarrhea<br>[0.77]   | LRI<br>[0.3]         | PEM<br>[2.14]      | Neonatal<br>[1.18]  | Road Inj<br>[0.62]   | Violence<br>[2.54]   | Epilepsy<br>[1.62]   | F Body<br>[0.81]     | Drown<br>[0.28]      |
| Puebla          | Congenital<br>[0.74] | LRI<br>[0.31]        | Neonatal<br>[1.13]   | Diarrhea<br>[0.55] | Road Inj<br>[0.6]   | PEM<br>[1.42]        | Violence<br>[1.67]   | F Body<br>[0.74]     | Leukemia<br>[0.87]   | Drown<br>[0.26]      |
| Queretaro       | Congenital<br>[0.51] | Neonatal<br>[1.2]    | Diarrhea<br>[0.61]   | Road Inj<br>[0.49] | LRI<br>[0.18]       | Dermatitis<br>[0.65] | Asthma<br>[0.73]     | Epilepsy<br>[1.17]   | Vit A<br>[0.93]      | Violence<br>[1.57]   |
| Quintana Roo    | Neonatal<br>[1.4]    | Congenital<br>[0.43] | Diarrhea<br>[0.7]    | LRI<br>[0.17]      | Road Inj<br>[0.43]  | Violence<br>[1.75]   | Dermatitis<br>[0.67] | Asthma<br>[0.67]     | Vit A<br>[0.88]      | F Body<br>[0.65]     |
| San Luis Potosi | Congenital<br>[0.66] | Neonatal<br>[1.04]   | LRI<br>[0.28]        | Diarrhea<br>[0.66] | Road Inj<br>[0.65]  | Epilepsy<br>[1.5]    | Vit A<br>[1.06]      | Violence<br>[1.84]   | Drown<br>[0.32]      | Asthma<br>[0.73]     |
| Sinaloa         | Congenital<br>[0.53] | Neonatal<br>[1.07]   | Road Inj<br>[0.76]   | Diarrhea<br>[0.71] | Violence<br>[2.5]   | LRI<br>[0.22]        | Vit A<br>[1.31]      | Drown<br>[0.4]       | Dermatitis<br>[0.64] | Asthma<br>[0.75]     |
| Sonora          | Congenital<br>[0.48] | Neonatal<br>[1.07]   | Road Inj<br>[0.68]   | Diarrhea<br>[0.77] | LRI<br>[0.24]       | Violence<br>[2.01]   | Vit A<br>[1.19]      | Dermatitis<br>[0.64] | Asthma<br>[0.75]     | Epilepsy<br>[1.24]   |
| Tabasco         | Congenital<br>[0.62] | Neonatal<br>[1.25]   | Diarrhea<br>[0.63]   | Drown<br>[0.52]    | LRI<br>[0.21]       | Road Inj<br>[0.64]   | Violence<br>[1.7]    | Epilepsy<br>[1.19]   | Leukemia<br>[0.81]   | Dermatitis<br>[0.67] |
| Tamaulipas      | Congenital<br>[0.54] | Neonatal<br>[1.27]   | Diarrhea<br>[0.72]   | Road Inj<br>[0.6]  | Violence<br>[2.14]  | Vit A<br>[1.24]      | LRI<br>[0.17]        | Drown<br>[0.33]      | Asthma<br>[0.7]      | Dermatitis<br>[0.54] |
| Tlaxcala        | Neonatal<br>[1.19]   | Congenital<br>[0.43] | LRI<br>[0.19]        | Diarrhea<br>[0.43] | Road Inj<br>[0.42]  | Epilepsy<br>[1.16]   | Dermatitis<br>[0.69] | Asthma<br>[0.64]     | Violence<br>[1.41]   | F Body<br>[0.51]     |
| Veracruz        | Congenital<br>[0.45] | Neonatal<br>[1.16]   | Diarrhea<br>[0.41]   | LRI<br>[0.12]      | Violence<br>[1.51]  | Dermatitis<br>[0.7]  | Epilepsy<br>[1.09]   | Asthma<br>[0.63]     | Iron<br>[0.83]       | PEM<br>[0.82]        |

**eFigure 7c. Leading ten causes of DALYs with the ratio of observed DALYs to DALYs expected on the basis of Socio-Demographic Index alone in 2017, 1-4 years, both sexes combined.** The top ten causes contributing to DALYs are listed globally, by socio-demographic quintile, and then by GBD superregion, region, country, and subnationally where modeled. For each cell, the ratio of observed DALYs to DALYs expected on the basis of socio-demographic index (SDI) alone are listed. Abbreviations: DALY=disability-adjusted life year, GBD=Global Burden of Disease.

Values shown in brackets represent the ratio of observed DALYs to predicted DALYs on the basis of Socio-Demographic Index (SDI), rounded to two (2) digits. Color ranges (shown below) were calculated to place a roughly equal number of cells into each bin.

| COLOR KEY:                    |                      | [0.0-0.5]            | [0.5-0.72]           | [0.72-0.86]          | [0.86-0.97]          | [0.97-1.1]           | [1.1-1.23]           | [1.23-1.41]          | [1.41-2.15]          | 2.15+                |
|-------------------------------|----------------------|----------------------|----------------------|----------------------|----------------------|----------------------|----------------------|----------------------|----------------------|----------------------|
|                               | 1                    | 2                    | 3                    | 4                    | 5                    | 6                    | 7                    | 8                    | 9                    | 10                   |
| Yucatan                       | Congenital<br>[0.52] | Neonatal<br>[1.07]   | LRI<br>[0.27]        | Diarrhea<br>[0.7]    | Road Inj<br>[0.38]   | Dermatitis<br>[0.63] | Epilepsy<br>[1.16]   | Violence<br>[1.51]   | Asthma<br>[0.66]     | Vit A<br>[0.83]      |
| Zacatecas                     | Congenital<br>[0.42] | Neonatal<br>[0.82]   | Road Inj<br>[0.67]   | LRI<br>[0.17]        | Diarrhea<br>[0.43]   | Epilepsy<br>[1.21]   | Violence<br>[1.6]    | Asthma<br>[0.7]      | Dermatitis<br>[0.68] | F Body<br>[0.61]     |
| Nicaragua                     | HIV<br>[3.83]        | Neonatal<br>[1.03]   | Diarrhea<br>[0.24]   | LRI<br>[0.12]        | Congenital<br>[0.22] | Dermatitis<br>[1.01] | Asthma<br>[0.62]     | Iron<br>[0.51]       | Epilepsy<br>[0.62]   | PEM<br>[0.26]        |
| Panama                        | Diarrhea<br>[3.47]   | LRI<br>[1.15]        | Congenital<br>[0.69] | PEM<br>[16.33]       | Neonatal<br>[1.11]   | Asthma<br>[1.51]     | Dermatitis<br>[1.01] | Drown<br>[0.59]      | Road Inj<br>[0.47]   | Iron<br>[1.53]       |
| Venezuela                     | Diarrhea<br>[2.01]   | Congenital<br>[0.55] | Neonatal<br>[1.15]   | LRI<br>[0.44]        | Road Inj<br>[0.6]    | Dermatitis<br>[0.9]  | Asthma<br>[0.96]     | PEM<br>[3.83]        | Drown<br>[0.35]      | F Body<br>[0.81]     |
| <b>Tropical Latin America</b> | Congenital<br>[0.41] | Neonatal<br>[0.84]   | LRI<br>[0.38]        | Asthma<br>[1.48]     | Diarrhea<br>[0.81]   | Dermatitis<br>[0.77] | Road Inj<br>[0.4]    | Vit A<br>[1.1]       | Drown<br>[0.33]      | Urticaria<br>[0.95]  |
| Brazil                        | Congenital<br>[0.43] | Neonatal<br>[0.85]   | LRI<br>[0.42]        | Asthma<br>[1.5]      | Diarrhea<br>[0.84]   | Dermatitis<br>[0.75] | Road Inj<br>[0.43]   | Vit A<br>[1.13]      | Drown<br>[0.36]      | Urticaria<br>[0.95]  |
| Acre                          | LRI<br>[0.33]        | Congenital<br>[0.39] | Neonatal<br>[0.85]   | Diarrhea<br>[0.55]   | Asthma<br>[1.17]     | Iron<br>[1.37]       | Drown<br>[0.35]      | Dermatitis<br>[0.83] | Road Inj<br>[0.34]   | Vit A<br>[0.84]      |
| Alagoas                       | LRI<br>[0.18]        | Diarrhea<br>[0.37]   | Congenital<br>[0.3]  | Neonatal<br>[0.73]   | Asthma<br>[0.92]     | Road Inj<br>[0.33]   | Vit A<br>[0.66]      | Dermatitis<br>[0.71] | PEM<br>[0.55]        | Drown<br>[0.19]      |
| Amapa                         | LRI<br>[0.76]        | Congenital<br>[0.46] | Drown<br>[0.9]       | Neonatal<br>[0.89]   | Asthma<br>[1.4]      | Diarrhea<br>[0.74]   | Dermatitis<br>[0.76] | Road Inj<br>[0.46]   | Vit A<br>[1.04]      | Iron<br>[1.29]       |
| Amazonas                      | LRI<br>[0.46]        | Congenital<br>[0.45] | Diarrhea<br>[1.05]   | Drown<br>[0.69]      | Neonatal<br>[0.75]   | Asthma<br>[1.3]      | Dermatitis<br>[0.79] | Vit A<br>[0.96]      | Road Inj<br>[0.36]   | PEM<br>[1.88]        |
| Bahia                         | Neonatal<br>[0.78]   | Congenital<br>[0.27] | Diarrhea<br>[0.39]   | Asthma<br>[1.08]     | LRI<br>[0.14]        | Dermatitis<br>[1.09] | Vit A<br>[1.09]      | Drown<br>[0.23]      | Road Inj<br>[0.24]   | Urticaria<br>[0.91]  |
| Ceara                         | Neonatal<br>[0.7]    | Asthma<br>[1.09]     | Congenital<br>[0.21] | Diarrhea<br>[0.32]   | Dermatitis<br>[0.83] | Vit A<br>[0.92]      | LRI<br>[0.09]        | Iron<br>[0.68]       | Leish<br>[31.01]     | Urticaria<br>[0.91]  |
| Distrito Federal              | Congenital<br>[0.81] | Neonatal<br>[1.01]   | Asthma<br>[2.06]     | Dermatitis<br>[0.68] | LRI<br>[1.11]        | Road Inj<br>[0.87]   | Diarrhea<br>[1.26]   | Urticaria<br>[1.18]  | Drown<br>[0.5]       | Vit A<br>[1.63]      |
| Espirito Santo                | Congenital<br>[0.52] | Neonatal<br>[0.84]   | Asthma<br>[1.76]     | LRI<br>[0.36]        | Dermatitis<br>[0.75] | Diarrhea<br>[0.74]   | Road Inj<br>[0.51]   | Drown<br>[0.43]      | Vit A<br>[1.15]      | Iron<br>[1.18]       |
| Goias                         | Congenital<br>[0.42] | Neonatal<br>[0.75]   | Asthma<br>[1.47]     | LRI<br>[0.29]        | Road Inj<br>[0.5]    | Dermatitis<br>[0.77] | Diarrhea<br>[0.57]   | Vit A<br>[0.99]      | Drown<br>[0.24]      | Urticaria<br>[0.94]  |
| Maranhao                      | Congenital<br>[0.28] | LRI<br>[0.11]        | Diarrhea<br>[0.16]   | Neonatal<br>[0.74]   | Vit A<br>[0.95]      | Asthma<br>[0.74]     | Road Inj<br>[0.31]   | Dermatitis<br>[0.86] | Drown<br>[0.17]      | Leish<br>[9.0]       |
| Mato Grosso                   | LRI<br>[0.62]        | Congenital<br>[0.49] | Neonatal<br>[0.82]   | Asthma<br>[1.59]     | Diarrhea<br>[0.95]   | Road Inj<br>[0.71]   | Drown<br>[0.54]      | Dermatitis<br>[0.76] | PEM<br>[3.27]        | Vit A<br>[0.89]      |
| Mato Grosso do Sul            | Congenital<br>[0.49] | LRI<br>[0.46]        | Neonatal<br>[0.88]   | Diarrhea<br>[0.91]   | Asthma<br>[1.44]     | Leish<br>[155.04]    | Road Inj<br>[0.56]   | Dermatitis<br>[0.77] | Vit A<br>[1.3]       | Drown<br>[0.33]      |
| Minas Gerais                  | Congenital<br>[0.49] | Neonatal<br>[0.9]    | Asthma<br>[1.59]     | LRI<br>[0.38]        | Diarrhea<br>[0.73]   | Road Inj<br>[0.47]   | Dermatitis<br>[0.66] | Drown<br>[0.35]      | Vit A<br>[1.01]      | Leukemia<br>[0.56]   |
| Para                          | LRI<br>[0.36]        | Congenital<br>[0.37] | Diarrhea<br>[0.54]   | Neonatal<br>[0.79]   | Drown<br>[0.49]      | Asthma<br>[1.11]     | Road Inj<br>[0.46]   | Iron<br>[1.02]       | Vit A<br>[0.92]      | Dermatitis<br>[0.85] |
| Paraiba                       | Congenital<br>[0.31] | LRI<br>[0.17]        | Neonatal<br>[0.69]   | Diarrhea<br>[0.34]   | Asthma<br>[0.99]     | Dermatitis<br>[0.85] | Vit A<br>[0.72]      | Road Inj<br>[0.29]   | Drown<br>[0.17]      | Iron<br>[0.45]       |
| Parana                        | Congenital<br>[0.55] | Neonatal<br>[0.87]   | Asthma<br>[1.76]     | Road Inj<br>[0.64]   | LRI<br>[0.33]        | Diarrhea<br>[0.79]   | Dermatitis<br>[0.67] | Vit A<br>[1.22]      | Drown<br>[0.35]      | Epilepsy<br>[0.89]   |
| Pernambuco                    | Congenital<br>[0.27] | Neonatal<br>[0.72]   | Asthma<br>[1.15]     | Diarrhea<br>[0.37]   | LRI<br>[0.12]        | Dermatitis<br>[0.81] | Vit A<br>[0.81]      | Urticaria<br>[0.91]  | Drown<br>[0.15]      | Road Inj<br>[0.19]   |
| Piaui                         | Congenital<br>[0.29] | Neonatal<br>[0.76]   | Diarrhea<br>[0.24]   | LRI<br>[0.11]        | Asthma<br>[0.93]     | Dermatitis<br>[0.86] | Leish<br>[24.68]     | Road Inj<br>[0.25]   | Vit A<br>[0.47]      | Drown<br>[0.13]      |
| Rio de Janeiro                | Neonatal<br>[1.08]   | Congenital<br>[0.53] | LRI<br>[0.86]        | Asthma<br>[1.67]     | Dermatitis<br>[0.73] | Diarrhea<br>[0.83]   | F Body<br>[1.04]     | Road Inj<br>[0.44]   | Vit A<br>[1.21]      | Drown<br>[0.4]       |
| Rio Grande do Norte           | Neonatal<br>[0.66]   | Congenital<br>[0.25] | Diarrhea<br>[0.46]   | Asthma<br>[1.11]     | Vit A<br>[1.22]      | LRI<br>[0.15]        | Dermatitis<br>[0.82] | Urticaria<br>[0.91]  | Road Inj<br>[0.2]    | Drown<br>[0.13]      |
| Rio Grande do Sul             | Congenital<br>[0.64] | Neonatal<br>[0.89]   | Asthma<br>[1.93]     | Dermatitis<br>[0.95] | LRI<br>[0.42]        | Epilepsy<br>[1.42]   | Diarrhea<br>[0.65]   | Road Inj<br>[0.43]   | Drown<br>[0.39]      | Vit A<br>[0.99]      |
| Rondonia                      | Congenital<br>[0.39] | Neonatal<br>[0.84]   | LRI<br>[0.27]        | Asthma<br>[1.23]     | Diarrhea<br>[0.47]   | Dermatitis<br>[0.81] | Road Inj<br>[0.4]    | Drown<br>[0.32]      | Vit A<br>[0.98]      | Urticaria<br>[0.92]  |
| Roraima                       | LRI<br>[0.68]        | Congenital<br>[0.49] | Neonatal<br>[0.92]   | Diarrhea<br>[0.97]   | Road Inj<br>[0.7]    | Drown<br>[0.6]       | Asthma<br>[1.31]     | Dermatitis<br>[0.78] | PEM<br>[3.1]         | Vit A<br>[0.9]       |
| Santa Catarina                | Congenital<br>[0.54] | Asthma<br>[1.94]     | Neonatal<br>[0.82]   | LRI<br>[0.52]        | Road Inj<br>[0.78]   | Dermatitis<br>[0.73] | Diarrhea<br>[0.76]   | Drown<br>[0.48]      | Vit A<br>[1.29]      | Leukemia<br>[0.67]   |

**eFigure 7c. Leading ten causes of DALYs with the ratio of observed DALYs to DALYs expected on the basis of Socio-Demographic Index alone in 2017, 1-4 years, both sexes combined.** The top ten causes contributing to DALYs are listed globally, by socio-demographic quintile, and then by GBD superregion, region, country, and subnationally where modeled. For each cell, the ratio of observed DALYs to DALYs expected on the basis of socio-demographic index (SDI) alone are listed. Abbreviations: DALY=disability-adjusted life year, GBD=Global Burden of Disease.

Values shown in brackets represent the ratio of observed DALYs to predicted DALYs on the basis of Socio-Demographic Index (SDI), rounded to two (2) digits. Color ranges (shown below) were calculated to place a roughly equal number of cells into each bin.

| COLOR KEY:                   |                                  | [0.0-0.5]                       | [0.5-0.72]                     | [0.72-0.86]                     | [0.86-0.97]          | [0.97-1.1]                     | [1.1-1.23]           | [1.23-1.41]          | [1.41-2.15]          | 2.15+                          |
|------------------------------|----------------------------------|---------------------------------|--------------------------------|---------------------------------|----------------------|--------------------------------|----------------------|----------------------|----------------------|--------------------------------|
|                              | 1                                | 2                               | 3                              | 4                               | 5                    | 6                              | 7                    | 8                    | 9                    | 10                             |
| Sao Paulo                    | Congenital<br>[0.51]             | Neonatal<br>[0.95]              | Asthma<br>[1.84]               | LRI<br>[0.71]                   | Dermatitis<br>[0.63] | Diarrhea<br>[0.77]             | Road Inj<br>[0.44]   | Drown<br>[0.4]       | Urticaria<br>[1.04]  | Epilepsy<br>[0.89]             |
| Sergipe                      | LRI<br>[0.37]                    | Congenital<br>[0.41]            | Neonatal<br>[0.92]             | Diarrhea<br>[0.7]               | Asthma<br>[1.31]     | Road Inj<br>[0.61]             | Drown<br>[0.44]      | Vit A<br>[1.21]      | Dermatitis<br>[0.68] | PEM<br>[1.53]                  |
| Tocantins                    | Leish<br>[132.03]                | Neonatal<br>[0.82]              | Congenital<br>[0.29]           | Asthma<br>[1.16]                | LRI<br>[0.18]        | Diarrhea<br>[0.44]             | Vit A<br>[1.26]      | Road Inj<br>[0.42]   | Dermatitis<br>[0.82] | Iron<br>[1.04]                 |
| Paraguay                     | HIV<br>[15.02]                   | Asthma<br>[1.42]                | Diarrhea<br>[0.65]             | Neonatal<br>[0.6]               | Dermatitis<br>[1.04] | Vit A<br>[0.84]                | Congenital<br>[0.13] | Iron<br>[0.86]       | Urticaria<br>[0.88]  | Skin Viral<br>[0.83]           |
| North Africa and Middle East | Diarrhea<br>[2.83]               | Congenital<br>[0.97]            | LRI<br>[0.78]                  | Conflict<br>Terror<br>[1172.11] | Road Inj<br>[1.31]   | Neonatal<br>[1.11]             | Whooping<br>[8.46]   | Iron<br>[2.44]       | Measles<br>[14.2]    | Asthma<br>[1.08]               |
| Afghanistan                  | LRI<br>[0.22]                    | Measles<br>[0.24]               | Diarrhea<br>[0.12]             | Congenital<br>[0.5]             | Whooping<br>[0.64]   | Meningitis<br>[0.37]           | Drown<br>[0.33]      | Falls<br>[2.81]      | Neonatal<br>[1.06]   | Road Inj<br>[0.34]             |
| Algeria                      | Congenital<br>[1.04]             | Neonatal<br>[1.11]              | Road Inj<br>[1.23]             | Diarrhea<br>[1.14]              | Asthma<br>[1.2]      | LRI<br>[0.39]                  | Dermatitis<br>[0.64] | Drown<br>[0.36]      | Epilepsy<br>[1.09]   | Falls<br>[1.17]                |
| Bahrain                      | Congenital<br>[0.65]             | Neonatal<br>[1.08]              | Asthma<br>[1.14]               | Road Inj<br>[0.67]              | Diarrhea<br>[1.05]   | Dermatitis<br>[0.72]           | Epilepsy<br>[1.08]   | Endocrine<br>[1.04]  | Urticaria<br>[1.05]  | LRI<br>[0.18]                  |
| Egypt                        | LRI<br>[0.72]                    | Diarrhea<br>[1.54]              | Congenital<br>[0.6]            | Road Inj<br>[1.29]              | Neonatal<br>[0.95]   | Asthma<br>[1.32]               | Iron<br>[1.03]       | Encepha<br>[0.9]     | Dermatitis<br>[0.57] | Cirrhosis<br>[1.61]            |
| Iran                         | Congenital<br>[0.9]              | Road Inj<br>[1.66]              | Neonatal<br>[1.27]             | Diarrhea<br>[0.93]              | LRI<br>[0.34]        | Asthma<br>[0.83]               | Dermatitis<br>[0.51] | Epilepsy<br>[1.21]   | Fire<br>[0.83]       | Iron<br>[1.61]                 |
| Iraq                         | Conflict<br>Terror<br>[3196.23]  | Congenital<br>[0.67]            | Neonatal<br>[1.14]             | LRI<br>[0.24]                   | Iron<br>[1.33]       | Road Inj<br>[0.47]             | Diarrhea<br>[0.31]   | Asthma<br>[0.81]     | Whooping<br>[1.96]   | Meningitis<br>[0.26]           |
| Jordan                       | Congenital<br>[1.1]              | Neonatal<br>[1.52]              | Road Inj<br>[1.46]             | LRI<br>[0.55]                   | Asthma<br>[1.34]     | Diarrhea<br>[1.07]             | Dermatitis<br>[0.64] | Vit A<br>[1.17]      | Iron<br>[1.75]       | Drown<br>[0.37]                |
| Kuwait                       | Congenital<br>[0.91]             | Neonatal<br>[1.22]              | Asthma<br>[1.53]               | Diarrhea<br>[1.7]               | Road Inj<br>[0.95]   | Dermatitis<br>[0.61]           | LRI<br>[0.83]        | Urticaria<br>[1.2]   | Epilepsy<br>[1.14]   | Skin Viral<br>[0.8]            |
| Lebanon                      | Neonatal<br>[1.01]               | Asthma<br>[1.52]                | Congenital<br>[0.37]           | Diarrhea<br>[1.5]               | Dermatitis<br>[0.73] | Conflict<br>Terror<br>[569.26] | HIV<br>[6.35]        | Urticaria<br>[1.08]  | Epilepsy<br>[0.87]   | Iron<br>[1.59]                 |
| Libya                        | Congenital<br>[1.77]             | Conflict<br>Terror<br>[3643.11] | Neonatal<br>[1.27]             | Road Inj<br>[1.83]              | Diarrhea<br>[2.49]   | Oth Cardio<br>[20.47]          | LRI<br>[0.99]        | Whooping<br>[32.0]   | Measles<br>[127.66]  | Asthma<br>[1.28]               |
| Morocco                      | Congenital<br>[0.67]             | Diarrhea<br>[0.66]              | Neonatal<br>[0.99]             | LRI<br>[0.13]                   | Road Inj<br>[0.48]   | Meningitis<br>[0.29]           | Iron<br>[0.93]       | Dermatitis<br>[0.78] | HIV<br>[1.86]        | Asthma<br>[0.65]               |
| Palestine                    | Congenital<br>[0.51]             | Neonatal<br>[1.37]              | Road Inj<br>[0.53]             | Diarrhea<br>[0.16]              | Asthma<br>[0.71]     | LRI<br>[0.07]                  | Dermatitis<br>[0.77] | Vit A<br>[0.53]      | Falls<br>[0.96]      | Epilepsy<br>[0.73]             |
| Oman                         | Road Inj<br>[3.05]               | Neonatal<br>[1.18]              | Congenital<br>[0.64]           | Diarrhea<br>[1.54]              | Drown<br>[0.96]      | Iron<br>[4.92]                 | Asthma<br>[1.05]     | Dermatitis<br>[0.57] | Oth Cardio<br>[9.51] | LRI<br>[0.51]                  |
| Qatar                        | Congenital<br>[0.71]             | Neonatal<br>[1.02]              | Road Inj<br>[1.1]              | Dermatitis<br>[0.69]            | Asthma<br>[1.06]     | Diarrhea<br>[0.98]             | Urticaria<br>[1.16]  | Epilepsy<br>[1.07]   | Drown<br>[0.39]      | Skin Viral<br>[0.8]            |
| Saudi Arabia                 | Congenital<br>[1.04]             | Neonatal<br>[1.01]              | Conflict<br>Terror<br>[1299.5] | Diarrhea<br>[1.84]              | Dermatitis<br>[0.69] | Road Inj<br>[0.83]             | Asthma<br>[0.94]     | Urticaria<br>[1.19]  | Epilepsy<br>[1.24]   | Drown<br>[0.56]                |
| Sudan                        | Diarrhea<br>[1.16]               | Congenital<br>[1.44]            | LRI<br>[0.37]                  | Road Inj<br>[2.02]              | Malaria<br>[71.74]   | Neonatal<br>[1.07]             | Drown<br>[0.45]      | Iron<br>[1.29]       | Whooping<br>[0.8]    | PEM<br>[0.41]                  |
| Syria                        | Conflict<br>Terror<br>[12418.82] | Congenital<br>[0.59]            | Whooping<br>[10.66]            | LRI<br>[0.39]                   | Neonatal<br>[0.95]   | PEM<br>[2.99]                  | Asthma<br>[1.08]     | Measles<br>[7.56]    | Iron<br>[1.37]       | Diarrhea<br>[0.34]             |
| Tunisia                      | Congenital<br>[0.52]             | Neonatal<br>[1.0]               | Road Inj<br>[0.62]             | Diarrhea<br>[0.8]               | Mech<br>[2.89]       | Dermatitis<br>[0.72]           | Asthma<br>[0.87]     | HIV<br>[3.06]        | Iron<br>[1.31]       | LRI<br>[0.16]                  |
| Turkey                       | Congenital<br>[1.3]              | Neonatal<br>[1.14]              | Road Inj<br>[0.91]             | LRI<br>[0.62]                   | Endocrine<br>[2.34]  | Epilepsy<br>[2.16]             | Diarrhea<br>[1.19]   | Asthma<br>[1.07]     | Dermatitis<br>[0.58] | Conflict<br>Terror<br>[473.99] |
| UAE                          | Congenital<br>[2.05]             | Road Inj<br>[2.92]              | Neonatal<br>[1.12]             | Asthma<br>[1.77]                | Diarrhea<br>[2.15]   | Dermatitis<br>[0.68]           | Epilepsy<br>[1.86]   | Drown<br>[0.87]      | PEM<br>[47.26]       | Other MN<br>[1.85]             |
| Yemen                        | Diarrhea<br>[0.67]               | Conflict<br>Terror<br>[754.88]  | Iron<br>[3.88]                 | Road Inj<br>[0.95]              | Congenital<br>[0.41] | LRI<br>[0.13]                  | Whooping<br>[0.65]   | Vit A<br>[1.27]      | Neonatal<br>[1.05]   | PEM<br>[0.22]                  |

**eFigure 7c. Leading ten causes of DALYs with the ratio of observed DALYs to DALYs expected on the basis of Socio-Demographic Index alone in 2017, 1-4 years, both sexes combined.** The top ten causes contributing to DALYs are listed globally, by socio-demographic quintile, and then by GBD superregion, region, country, and subnationally where modeled. For each cell, the ratio of observed DALYs to DALYs expected on the basis of socio-demographic index (SDI) alone are listed. Abbreviations: DALY=disability-adjusted life year, GBD=Global Burden of Disease.

Values shown in brackets represent the ratio of observed DALYs to predicted DALYs on the basis of Socio-Demographic Index (SDI), rounded to two (2) digits. Color ranges (shown below) were calculated to place a roughly equal number of cells into each bin.

| COLOR KEY:        |                             | [0.0-0.5]                 | [0.5-0.72]                         | [0.72-0.86]                         | [0.86-0.97]                        | [0.97-1.1]                         | [1.1-1.23]                  | [1.23-1.41]                        | [1.41-2.15]                       | 2.15+                             |
|-------------------|-----------------------------|---------------------------|------------------------------------|-------------------------------------|------------------------------------|------------------------------------|-----------------------------|------------------------------------|-----------------------------------|-----------------------------------|
|                   | 1                           | 2                         | 3                                  | 4                                   | 5                                  | 6                                  | 7                           | 8                                  | 9                                 | 10                                |
| <b>South Asia</b> | <b>Diarrhea</b><br>[0.89]   | <b>LRI</b><br>[0.44]      | <b>Drown</b><br>[0.69]             | <b>Typh + Paratyph</b><br>[49.05]   | <b>Iron</b><br>[1.94]              | <b>Neonatal</b><br>[1.12]          | <b>PEM</b><br>[1.33]        | <b>Congenital</b><br>[0.33]        | <b>Malaria</b><br>[210.94]        | <b>Measles</b><br>[2.32]          |
| Bangladesh        | <b>Drown</b><br>[1.55]      | <b>LRI</b><br>[0.27]      | <b>Typh + Paratyph</b><br>[22.19]  | <b>PEM</b><br>[0.47]                | <b>Diarrhea</b><br>[0.13]          | <b>Neonatal</b><br>[1.0]           | <b>Congenital</b><br>[0.25] | <b>Whooping</b><br>[0.55]          | <b>Iron</b><br>[0.96]             | <b>Vit A</b><br>[0.46]            |
| Bhutan            | <b>Iron</b><br>[4.45]       | <b>LRI</b><br>[0.25]      | <b>Congenital</b><br>[0.38]        | <b>Neonatal</b><br>[1.05]           | <b>HIV</b><br>[3.34]               | <b>Vit A</b><br>[1.33]             | <b>Encepha</b><br>[1.24]    | <b>Diarrhea</b><br>[0.26]          | <b>Measles</b><br>[2.76]          | <b>Malaria</b><br>[262.96]        |
| India             | <b>Diarrhea</b><br>[0.99]   | <b>LRI</b><br>[0.45]      | <b>Malaria</b><br>[396.97]         | <b>Typh + Paratyph</b><br>[64.94]   | <b>PEM</b><br>[1.77]               | <b>Measles</b><br>[3.92]           | <b>Iron</b><br>[2.09]       | <b>Neonatal</b><br>[1.12]          | <b>Congenital</b><br>[0.31]       | <b>Drown</b><br>[0.51]            |
| Andhra Pradesh    | <b>Iron</b><br>[2.01]       | <b>Neonatal</b><br>[1.13] | <b>PEM</b><br>[1.06]               | <b>Vit A</b><br>[1.31]              | <b>Diarrhea</b><br>[0.23]          | <b>Typh + Paratyph</b><br>[31.82]  | <b>Measles</b><br>[1.49]    | <b>Congenital</b><br>[0.18]        | <b>LRI</b><br>[0.07]              | <b>Encepha</b><br>[0.74]          |
| Arunachal Pradesh | <b>Diarrhea</b><br>[0.76]   | <b>LRI</b><br>[0.33]      | <b>Malaria</b><br>[626.67]         | <b>Neonatal</b><br>[1.14]           | <b>Measles</b><br>[4.1]            | <b>PEM</b><br>[1.63]               | <b>Iron</b><br>[1.77]       | <b>Congenital</b><br>[0.25]        | <b>Drown</b><br>[0.4]             | <b>Typh + Paratyph</b><br>[41.88] |
| Assam             | <b>Diarrhea</b><br>[1.57]   | <b>LRI</b><br>[0.75]      | <b>Malaria</b><br>[576.55]         | <b>Drown</b><br>[1.48]              | <b>Hep</b><br>[10.74]              | <b>Measles</b><br>[3.42]           | <b>Congenital</b><br>[0.49] | <b>PEM</b><br>[1.45]               | <b>Neonatal</b><br>[1.13]         | <b>Typh + Paratyph</b><br>[40.11] |
| Bihar             | <b>Diarrhea</b><br>[0.63]   | <b>LRI</b><br>[0.43]      | <b>Measles</b><br>[0.57]           | <b>Malaria</b><br>[13.24]           | <b>Drown</b><br>[0.49]             | <b>Neonatal</b><br>[1.06]          | <b>PEM</b><br>[0.36]        | <b>Iron</b><br>[1.21]              | <b>Congenital</b><br>[0.23]       | <b>Encepha</b><br>[1.67]          |
| Chhattisgarh      | <b>LRI</b><br>[0.29]        | <b>Diarrhea</b><br>[0.4]  | <b>Malaria</b><br>[183.41]         | <b>Typh + Paratyph</b><br>[36.58]   | <b>PEM</b><br>[1.12]               | <b>Measles</b><br>[1.87]           | <b>Neonatal</b><br>[1.09]   | <b>Drown</b><br>[0.41]             | <b>Congenital</b><br>[0.23]       | <b>Vit A</b><br>[0.91]            |
| Delhi             | <b>LRI</b><br>[1.94]        | <b>Iron</b><br>[13.69]    | <b>Diarrhea</b><br>[3.82]          | <b>Typh + Paratyph</b><br>[1960.66] | <b>Neonatal</b><br>[1.31]          | <b>Congenital</b><br>[0.58]        | <b>PEM</b><br>[31.17]       | <b>Vit A</b><br>[3.77]             | <b>Meningitis</b><br>[1.07]       | <b>Measles</b><br>[47.64]         |
| Goa               | <b>LRI</b><br>[1.97]        | <b>Neonatal</b><br>[1.59] | <b>Congenital</b><br>[0.7]         | <b>Encepha</b><br>[8.58]            | <b>Drown</b><br>[1.5]              | <b>PEM</b><br>[44.38]              | <b>Iron</b><br>[7.18]       | <b>Diarrhea</b><br>[2.11]          | <b>Measles</b><br>[118.49]        | <b>Vit A</b><br>[2.4]             |
| Gujarat           | <b>LRI</b><br>[0.38]        | <b>Iron</b><br>[3.13]     | <b>Malaria</b><br>[894.27]         | <b>Neonatal</b><br>[1.17]           | <b>PEM</b><br>[3.22]               | <b>Diarrhea</b><br>[0.67]          | <b>Congenital</b><br>[0.4]  | <b>Measles</b><br>[6.48]           | <b>Typh + Paratyph</b><br>[87.78] | <b>Vit A</b><br>[1.59]            |
| Haryana           | <b>Iron</b><br>[5.03]       | <b>LRI</b><br>[0.39]      | <b>Typh + Paratyph</b><br>[199.45] | <b>Diarrhea</b><br>[0.97]           | <b>Neonatal</b><br>[1.18]          | <b>Vit A</b><br>[2.03]             | <b>PEM</b><br>[2.81]        | <b>Congenital</b><br>[0.3]         | <b>Measles</b><br>[8.06]          | <b>Malaria</b><br>[504.32]        |
| Himachal Pradesh  | <b>LRI</b><br>[0.51]        | <b>Iron</b><br>[4.54]     | <b>Neonatal</b><br>[1.31]          | <b>Congenital</b><br>[0.41]         | <b>Diarrhea</b><br>[1.05]          | <b>Typh + Paratyph</b><br>[248.12] | <b>Vit A</b><br>[2.12]      | <b>Measles</b><br>[9.93]           | <b>Falls</b><br>[1.47]            | <b>PEM</b><br>[2.52]              |
| Jammu & Kashmir   | <b>Iron</b><br>[2.98]       | <b>Neonatal</b><br>[1.13] | <b>LRI</b><br>[0.25]               | <b>Vit A</b><br>[1.7]               | <b>Congenital</b><br>[0.27]        | <b>Diarrhea</b><br>[0.31]          | <b>Measles</b><br>[4.15]    | <b>Typh + Paratyph</b><br>[44.94]  | <b>Drown</b><br>[0.23]            | <b>ID</b><br>[7.1]                |
| Jharkhand         | <b>Diarrhea</b><br>[0.67]   | <b>LRI</b><br>[0.35]      | <b>Drown</b><br>[0.72]             | <b>Malaria</b><br>[81.48]           | <b>PEM</b><br>[0.87]               | <b>Measles</b><br>[1.13]           | <b>Iron</b><br>[1.71]       | <b>Congenital</b><br>[0.35]        | <b>Neonatal</b><br>[1.1]          | <b>Typh + Paratyph</b><br>[13.96] |
| Karnataka         | <b>Congenital</b><br>[0.49] | <b>Neonatal</b><br>[1.3]  | <b>Iron</b><br>[2.26]              | <b>PEM</b><br>[2.36]                | <b>Measles</b><br>[5.88]           | <b>LRI</b><br>[0.19]               | <b>Diarrhea</b><br>[0.39]   | <b>Drown</b><br>[0.45]             | <b>Vit A</b><br>[1.38]            | <b>Encepha</b><br>[1.2]           |
| Kerala            | <b>Neonatal</b><br>[1.58]   | <b>PEM</b><br>[7.85]      | <b>Congenital</b><br>[0.3]         | <b>Iron</b><br>[2.36]               | <b>Measles</b><br>[17.54]          | <b>Vit A</b><br>[1.39]             | <b>Dermatitis</b><br>[0.43] | <b>Urticaria</b><br>[0.96]         | <b>LRI</b><br>[0.11]              | <b>Encepha</b><br>[0.92]          |
| Madhya Pradesh    | <b>LRI</b><br>[0.36]        | <b>Diarrhea</b><br>[0.33] | <b>Typh + Paratyph</b><br>[33.02]  | <b>Measles</b><br>[1.46]            | <b>PEM</b><br>[0.95]               | <b>Malaria</b><br>[72.66]          | <b>Iron</b><br>[1.82]       | <b>Drown</b><br>[0.55]             | <b>Neonatal</b><br>[1.01]         | <b>Vit A</b><br>[1.21]            |
| Maharashtra       | <b>Neonatal</b><br>[1.27]   | <b>PEM</b><br>[6.4]       | <b>LRI</b><br>[0.4]                | <b>Iron</b><br>[3.26]               | <b>Congenital</b><br>[0.38]        | <b>Diarrhea</b><br>[0.72]          | <b>Measles</b><br>[12.0]    | <b>Typh + Paratyph</b><br>[149.29] | <b>Vit A</b><br>[1.57]            | <b>Drown</b><br>[0.48]            |
| Manipur           | <b>LRI</b><br>[0.64]        | <b>Diarrhea</b><br>[1.42] | <b>Drown</b><br>[1.06]             | <b>Typh + Paratyph</b><br>[165.54]  | <b>Congenital</b><br>[0.52]        | <b>Neonatal</b><br>[1.29]          | <b>Malaria</b><br>[819.45]  | <b>Measles</b><br>[7.19]           | <b>Whooping</b><br>[3.95]         | <b>Road Inj</b><br>[0.47]         |
| Meghalaya         | <b>Malaria</b><br>[2957.46] | <b>LRI</b><br>[0.89]      | <b>Diarrhea</b><br>[1.33]          | <b>Congenital</b><br>[0.65]         | <b>Typh + Paratyph</b><br>[129.07] | <b>Neonatal</b><br>[1.25]          | <b>Measles</b><br>[5.09]    | <b>Meningitis</b><br>[0.55]        | <b>Drown</b><br>[0.47]            | <b>Whooping</b><br>[2.25]         |

**eFigure 7c. Leading ten causes of DALYs with the ratio of observed DALYs to DALYs expected on the basis of Socio-Demographic Index alone in 2017, 1-4 years, both sexes combined.** The top ten causes contributing to DALYs are listed globally, by socio-demographic quintile, and then by GBD superregion, region, country, and subnationally where modeled. For each cell, the ratio of observed DALYs to DALYs expected on the basis of socio-demographic index (SDI) alone are listed. Abbreviations: DALY=disability-adjusted life year, GBD=Global Burden of Disease.

Values shown in brackets represent the ratio of observed DALYs to predicted DALYs on the basis of Socio-Demographic Index (SDI), rounded to two (2) digits. Color ranges (shown below) were calculated to place a roughly equal number of cells into each bin.

| COLOR KEY:                             |                             | [0.0-0.5]            | [0.5-0.72]                  | [0.72-0.86]                 | [0.86-0.97]                 | [0.97-1.1]                 | [1.1-1.23]           | [1.23-1.41]          | [1.41-2.15]          | 2.15+                |
|----------------------------------------|-----------------------------|----------------------|-----------------------------|-----------------------------|-----------------------------|----------------------------|----------------------|----------------------|----------------------|----------------------|
|                                        | 1                           | 2                    | 3                           | 4                           | 5                           | 6                          | 7                    | 8                    | 9                    | 10                   |
| Mizoram                                | LRI<br>[1.58]               | Malaria<br>[4504.71] | Typh + Paratyph<br>[430.03] | Congenital<br>[0.55]        | Neonatal<br>[1.31]          | Diarrhea<br>[0.96]         | Drown<br>[0.66]      | PEM<br>[3.59]        | Meningitis<br>[0.62] | Whooping<br>[5.08]   |
| Nagaland                               | LRI<br>[1.97]               | Malaria<br>[6787.94] | Drown<br>[1.95]             | Typh + Paratyph<br>[480.24] | Diarrhea<br>[1.82]          | Neonatal<br>[1.45]         | Hep<br>[21.23]       | Whooping<br>[12.94]  | Measles<br>[24.75]   | Congenital<br>[0.46] |
| Odisha                                 | Malaria<br>[813.6]          | Diarrhea<br>[0.81]   | LRI<br>[0.36]               | Drown<br>[0.74]             | PEM<br>[1.35]               | Typh + Paratyph<br>[41.25] | Neonatal<br>[1.1]    | Congenital<br>[0.3]  | Hep<br>[5.54]        | Encepha<br>[1.23]    |
| Punjab                                 | Diarrhea<br>[1.69]          | LRI<br>[0.61]        | Typh + Paratyph<br>[310.53] | Congenital<br>[0.54]        | Neonatal<br>[1.24]          | Iron<br>[3.6]              | Vit A<br>[1.78]      | Measles<br>[10.25]   | PEM<br>[3.15]        | Drown<br>[0.35]      |
| Rajasthan                              | LRI<br>[0.37]               | Diarrhea<br>[0.33]   | Typh + Paratyph<br>[35.08]  | Measles<br>[1.35]           | PEM<br>[0.82]               | Malaria<br>[69.29]         | Iron<br>[1.62]       | Neonatal<br>[0.96]   | Drown<br>[0.36]      | Vit A<br>[1.13]      |
| Sikkim                                 | LRI<br>[0.82]               | Measles<br>[27.57]   | Neonatal<br>[1.33]          | Diarrhea<br>[1.12]          | Typh + Paratyph<br>[231.29] | Congenital<br>[0.35]       | Iron<br>[2.75]       | Vit A<br>[1.57]      | Encepha<br>[1.69]    | Drown<br>[0.28]      |
| Tamil Nadu                             | Neonatal<br>[1.19]          | PEM<br>[4.51]        | Iron<br>[2.4]               | Vit A<br>[1.55]             | Congenital<br>[0.23]        | Typh + Paratyph<br>[94.52] | Diarrhea<br>[0.34]   | Measles<br>[5.77]    | LRI<br>[0.11]        | Encepha<br>[0.75]    |
| Telangana                              | Iron<br>[2.96]              | Neonatal<br>[1.18]   | PEM<br>[2.54]               | Vit A<br>[1.61]             | Typh + Paratyph<br>[61.69]  | Diarrhea<br>[0.3]          | Measles<br>[3.09]    | Congenital<br>[0.17] | LRI<br>[0.07]        | Encepha<br>[0.66]    |
| Tripura                                | LRI<br>[0.32]               | Measles<br>[4.71]    | Diarrhea<br>[0.49]          | Neonatal<br>[1.15]          | Malaria<br>[332.3]          | Congenital<br>[0.33]       | PEM<br>[1.3]         | Whooping<br>[1.84]   | Drown<br>[0.38]      | Iron<br>[1.03]       |
| Uttar Pradesh                          | Diarrhea<br>[0.78]          | LRI<br>[0.35]        | Typh + Paratyph<br>[32.41]  | Malaria<br>[82.27]          | Iron<br>[1.88]              | PEM<br>[0.85]              | Measles<br>[1.26]    | Neonatal<br>[0.98]   | Congenital<br>[0.27] | Meningitis<br>[0.29] |
| Uttarakhand                            | Typh + Paratyph<br>[256.62] | LRI<br>[0.45]        | Iron<br>[4.04]              | Neonatal<br>[1.27]          | Diarrhea<br>[0.8]           | Congenital<br>[0.32]       | Vit A<br>[1.82]      | PEM<br>[2.27]        | Malaria<br>[504.77]  | Drown<br>[0.38]      |
| W Bengal                               | Measles<br>[3.98]           | LRI<br>[0.19]        | Drown<br>[0.62]             | Neonatal<br>[1.06]          | Congenital<br>[0.3]         | Iron<br>[1.43]             | Diarrhea<br>[0.24]   | Vit A<br>[1.14]      | PEM<br>[0.84]        | Malaria<br>[109.15]  |
| UTs other than Delhi                   | LRI<br>[0.77]               | Neonatal<br>[1.44]   | Iron<br>[5.65]              | Congenital<br>[0.5]         | Diarrhea<br>[1.46]          | Drown<br>[0.85]            | Vit A<br>[2.3]       | PEM<br>[7.11]        | Malaria<br>[3247.36] | Encepha<br>[2.57]    |
| Nepal                                  | LRI<br>[0.16]               | Neonatal<br>[1.05]   | Diarrhea<br>[0.1]           | Whooping<br>[0.41]          | Typh + Paratyph<br>[6.09]   | HIV<br>[1.51]              | Iron<br>[0.67]       | Drown<br>[0.2]       | Malaria<br>[3.73]    | Encepha<br>[0.8]     |
| Pakistan                               | Diarrhea<br>[0.94]          | LRI<br>[0.48]        | Meningitis<br>[0.75]        | Drown<br>[0.83]             | Congenital<br>[0.42]        | Iron<br>[1.95]             | Neonatal<br>[1.17]   | Whooping<br>[1.03]   | Road Inj<br>[0.62]   | PEM<br>[0.58]        |
| Southeast Asia, East Asia, and Oceania | LRI<br>[0.87]               | Congenital<br>[0.59] | Drown<br>[1.36]             | Diarrhea<br>[1.81]          | Neonatal<br>[1.0]           | Road Inj<br>[0.7]          | Asthma<br>[1.19]     | Measles<br>[26.96]   | Dermatitis<br>[0.67] | Leukemia<br>[0.89]   |
| East Asia                              | Neonatal<br>[1.26]          | Drown<br>[1.49]      | Congenital<br>[0.56]        | Road Inj<br>[1.01]          | LRI<br>[0.51]               | Diarrhea<br>[0.84]         | Dermatitis<br>[0.55] | Leukemia<br>[0.95]   | Falls<br>[1.39]      | Asthma<br>[0.71]     |
| China                                  | Neonatal<br>[1.27]          | Drown<br>[1.43]      | Congenital<br>[0.54]        | Road Inj<br>[0.99]          | LRI<br>[0.46]               | Diarrhea<br>[0.76]         | Dermatitis<br>[0.55] | Leukemia<br>[0.93]   | Falls<br>[1.38]      | Asthma<br>[0.68]     |
| N Korea                                | Drown<br>[1.01]             | LRI<br>[0.3]         | Congenital<br>[0.55]        | Diarrhea<br>[0.41]          | Road Inj<br>[0.63]          | Neonatal<br>[0.69]         | Whooping<br>[1.15]   | HIV<br>[1.58]        | Leukemia<br>[0.84]   | Vit A<br>[0.64]      |
| Taiwan                                 | Asthma<br>[2.58]            | Congenital<br>[0.82] | Diarrhea<br>[2.64]          | Neonatal<br>[0.64]          | Dermatitis<br>[0.62]        | Road Inj<br>[0.9]          | LRI<br>[1.84]        | Skin Viral<br>[1.04] | Urticaria<br>[1.24]  | Drown<br>[0.95]      |
| Oceania                                | Diarrhea<br>[0.86]          | PEM<br>[1.77]        | LRI<br>[0.33]               | Congenital<br>[0.77]        | Drown<br>[0.89]             | Whooping<br>[1.11]         | Asthma<br>[1.88]     | Measles<br>[0.93]    | Meningitis<br>[0.42] | Iron<br>[1.23]       |
| Am Samoa                               | Asthma<br>[2.32]            | LRI<br>[0.71]        | Congenital<br>[0.45]        | Diarrhea<br>[1.61]          | Measles<br>[58.23]          | Neonatal<br>[0.72]         | Dermatitis<br>[0.91] | Drown<br>[0.74]      | Vit A<br>[1.63]      | PEM<br>[9.59]        |
| Micronesia                             | LRI<br>[0.31]               | Whooping<br>[5.11]   | Congenital<br>[0.46]        | HIV<br>[4.54]               | Asthma<br>[1.47]            | Diarrhea<br>[0.4]          | Neonatal<br>[0.77]   | Drown<br>[0.41]      | PEM<br>[1.32]        | Dermatitis<br>[1.05] |
| Fiji                                   | LRI<br>[1.19]               | Congenital<br>[1.15] | Diarrhea<br>[2.81]          | Drown<br>[1.32]             | Asthma<br>[2.09]            | Measles<br>[25.33]         | Neonatal<br>[0.87]   | PEM<br>[5.02]        | Iron<br>[2.37]       | F Body<br>[1.31]     |
| Guam                                   | Diarrhea<br>[4.44]          | Congenital<br>[0.87] | Asthma<br>[2.63]            | LRI<br>[2.49]               | Neonatal<br>[0.85]          | Dermatitis<br>[0.85]       | Drown<br>[1.11]      | Measles<br>[203.81]  | Road Inj<br>[0.86]   | Vit A<br>[2.28]      |

**eFigure 7c. Leading ten causes of DALYs with the ratio of observed DALYs to DALYs expected on the basis of Socio-Demographic Index alone in 2017, 1-4 years, both sexes combined.** The top ten causes contributing to DALYs are listed globally, by socio-demographic quintile, and then by GBD superregion, region, country, and subnationally where modeled. For each cell, the ratio of observed DALYs to DALYs expected on the basis of socio-demographic index (SDI) alone are listed. Abbreviations: DALY=disability-adjusted life year, GBD=Global Burden of Disease.

Values shown in brackets represent the ratio of observed DALYs to predicted DALYs on the basis of Socio-Demographic Index (SDI), rounded to two (2) digits. Color ranges (shown below) were calculated to place a roughly equal number of cells into each bin.

| COLOR KEY:                 |                       | [0.0-0.5]            | [0.5-0.72]           | [0.72-0.86]          | [0.86-0.97]          | [0.97-1.1]                  | [1.1-1.23]           | [1.23-1.41]          | [1.41-2.15]                 | 2.15+                |
|----------------------------|-----------------------|----------------------|----------------------|----------------------|----------------------|-----------------------------|----------------------|----------------------|-----------------------------|----------------------|
|                            | 1                     | 2                    | 3                    | 4                    | 5                    | 6                           | 7                    | 8                    | 9                           | 10                   |
| Kiribati                   | PEM<br>[1.34]         | Measles<br>[1.26]    | Congenital<br>[0.91] | Diarrhea<br>[0.31]   | LRI<br>[0.17]        | Whooping<br>[0.89]          | Meningitis<br>[0.41] | Neonatal<br>[1.46]   | Asthma<br>[1.34]            | Drown<br>[0.25]      |
| Marshall                   | LRI<br>[0.37]         | Congenital<br>[0.59] | Whooping<br>[3.95]   | Measles<br>[5.34]    | Iron<br>[1.54]       | PEM<br>[1.27]               | Diarrhea<br>[0.3]    | Asthma<br>[1.28]     | Drown<br>[0.44]             | Neonatal<br>[0.74]   |
| N Mariana                  | Asthma<br>[2.6]       | Congenital<br>[0.67] | Diarrhea<br>[2.86]   | LRI<br>[1.49]        | Drown<br>[1.61]      | Neonatal<br>[0.86]          | Dermatitis<br>[0.87] | Measles<br>[112.46]  | Road Inj<br>[0.68]          | PEM<br>[28.78]       |
| PNG                        | Diarrhea<br>[0.61]    | PEM<br>[1.17]        | LRI<br>[0.25]        | Congenital<br>[0.7]  | Drown<br>[0.83]      | Whooping<br>[0.74]          | Asthma<br>[1.79]     | Measles<br>[0.45]    | Meningitis<br>[0.38]        | Iron<br>[1.12]       |
| Samoa                      | Measles<br>[10.66]    | LRI<br>[0.27]        | Congenital<br>[0.4]  | Whooping<br>[3.66]   | Asthma<br>[1.39]     | Diarrhea<br>[0.38]          | Neonatal<br>[0.74]   | Vit A<br>[1.11]      | Drown<br>[0.35]             | Dermatitis<br>[1.05] |
| Solomon                    | LRI<br>[0.24]         | Congenital<br>[0.47] | Diarrhea<br>[0.17]   | PEM<br>[0.36]        | Whooping<br>[0.54]   | Drown<br>[0.37]             | Neonatal<br>[0.8]    | Iron<br>[0.87]       | Asthma<br>[0.86]            | STI<br>[5.54]        |
| Tonga                      | LRI<br>[0.59]         | Asthma<br>[2.22]     | Congenital<br>[0.45] | Drown<br>[0.87]      | Meningitis<br>[0.93] | Measles<br>[16.69]          | Neonatal<br>[0.8]    | Diarrhea<br>[0.72]   | PEM<br>[3.96]               | Road Inj<br>[0.69]   |
| Vanuatu                    | LRI<br>[0.36]         | Congenital<br>[0.55] | Diarrhea<br>[0.3]    | Whooping<br>[1.2]    | PEM<br>[0.71]        | Drown<br>[0.46]             | Asthma<br>[1.2]      | Neonatal<br>[0.81]   | Iron<br>[0.86]              | Road Inj<br>[0.39]   |
| Southeast Asia             | LRI<br>[0.91]         | Diarrhea<br>[1.97]   | Congenital<br>[0.58] | Drown<br>[1.08]      | Measles<br>[20.81]   | Asthma<br>[1.67]            | Dengue<br>[77.67]    | Neonatal<br>[0.64]   | Meningitis<br>[0.59]        | PEM<br>[3.93]        |
| Cambodia                   | LRI<br>[0.41]         | Drown<br>[0.8]       | Congenital<br>[0.34] | Iron<br>[1.26]       | Diarrhea<br>[0.15]   | Mech<br>[2.59]              | Malaria<br>[25.66]   | Neonatal<br>[0.56]   | Dermatitis<br>[1.05]        | Asthma<br>[0.63]     |
| Indonesia                  | Diarrhea<br>[2.76]    | Measles<br>[59.69]   | LRI<br>[0.58]        | Dengue<br>[153.44]   | Congenital<br>[0.35] | Drown<br>[0.74]             | PEM<br>[6.86]        | Asthma<br>[1.32]     | Neonatal<br>[0.63]          | HIV<br>[4.65]        |
| Laos                       | LRI<br>[0.82]         | Diarrhea<br>[1.16]   | Drown<br>[0.91]      | Congenital<br>[0.57] | Whooping<br>[1.49]   | Asthma<br>[1.44]            | Road Inj<br>[0.69]   | HIV<br>[3.13]        | Meningitis<br>[0.35]        | Measles<br>[1.23]    |
| Malaysia                   | HIV<br>[50.94]        | Neonatal<br>[0.73]   | Dermatitis<br>[0.93] | Diarrhea<br>[1.92]   | Congenital<br>[0.32] | Asthma<br>[1.12]            | PEM<br>[28.16]       | Dengue<br>[821.44]   | Urticaria<br>[1.02]         | Skin Viral<br>[0.94] |
| Maldives                   | Congenital<br>[0.38]  | Dengue<br>[86.15]    | Neonatal<br>[0.56]   | Dermatitis<br>[0.93] | Asthma<br>[1.13]     | Drown<br>[0.52]             | Diarrhea<br>[0.44]   | LRI<br>[0.14]        | PEM<br>[2.74]               | Vit A<br>[0.81]      |
| Mauritius                  | Congenital<br>[0.63]  | Asthma<br>[1.84]     | Diarrhea<br>[1.76]   | Neonatal<br>[0.73]   | Dermatitis<br>[0.87] | Iron<br>[4.14]              | LRI<br>[0.55]        | PEM<br>[15.17]       | Epilepsy<br>[1.23]          | Leukemia<br>[0.76]   |
| Myanmar                    | LRI<br>[0.57]         | Drown<br>[1.5]       | Congenital<br>[0.83] | Diarrhea<br>[0.76]   | Whooping<br>[2.77]   | Meningitis<br>[0.47]        | Asthma<br>[1.39]     | Neonatal<br>[0.66]   | Typh + Paratyph<br>[38.13]  | Malaria<br>[202.51]  |
| Philippines                | LRI<br>[1.51]         | Congenital<br>[0.93] | Diarrhea<br>[1.97]   | Asthma<br>[3.13]     | Drown<br>[0.94]      | Dengue<br>[77.65]           | Meningitis<br>[0.82] | Neonatal<br>[0.73]   | PEM<br>[3.29]               | Leukemia<br>[1.35]   |
| Sri Lanka                  | Congenital<br>[0.48]  | Neonatal<br>[0.64]   | Dermatitis<br>[0.9]  | Asthma<br>[1.09]     | Diarrhea<br>[0.58]   | Typh + Paratyph<br>[221.87] | LRI<br>[0.2]         | PEM<br>[4.5]         | Vit A<br>[0.87]             | Epilepsy<br>[0.88]   |
| Seychelles                 | LRI<br>[0.89]         | Congenital<br>[0.47] | Drown<br>[0.91]      | Neonatal<br>[0.68]   | Dermatitis<br>[0.9]  | Asthma<br>[1.16]            | Diarrhea<br>[0.86]   | Meningitis<br>[0.54] | Leukemia<br>[0.59]          | Urticaria<br>[0.91]  |
| Thailand                   | Drown<br>[1.27]       | Congenital<br>[0.5]  | LRI<br>[0.47]        | Dermatitis<br>[0.98] | Neonatal<br>[0.58]   | Road Inj<br>[0.66]          | Asthma<br>[1.16]     | HIV<br>[5.74]        | Typh + Paratyph<br>[328.16] | Diarrhea<br>[0.74]   |
| Timor-Leste                | LRI<br>[0.58]         | Diarrhea<br>[0.53]   | HIV<br>[7.14]        | Congenital<br>[0.57] | Drown<br>[0.63]      | Iron<br>[1.92]              | PEM<br>[0.73]        | Asthma<br>[1.11]     | Whooping<br>[0.82]          | Vit A<br>[0.94]      |
| Vietnam                    | Drown<br>[1.33]       | Congenital<br>[0.43] | LRI<br>[0.25]        | Neonatal<br>[0.49]   | Whooping<br>[3.18]   | Dermatitis<br>[0.88]        | Asthma<br>[0.76]     | Diarrhea<br>[0.3]    | Enceph<br>[0.94]            | Iron<br>[0.82]       |
| Sub-Saharan Africa         | Malaria<br>[225.14]   | Diarrhea<br>[1.34]   | LRI<br>[0.91]        | PEM<br>[1.95]        | Meningitis<br>[1.04] | Congenital<br>[0.89]        | Measles<br>[1.35]    | Whooping<br>[1.29]   | HIV<br>[3.84]               | iNTS<br>[6.66]       |
| Central Sub-Saharan Africa | Malaria<br>[421.1]    | LRI<br>[0.88]        | Diarrhea<br>[1.18]   | PEM<br>[2.34]        | Congenital<br>[1.36] | Road Inj<br>[2.3]           | Drown<br>[1.25]      | Whooping<br>[1.94]   | TB<br>[2.74]                | Measles<br>[1.18]    |
| Angola                     | Diarrhea<br>[1.49]    | Malaria<br>[152.63]  | LRI<br>[0.6]         | PEM<br>[2.34]        | Measles<br>[2.28]    | Congenital<br>[0.99]        | Road Inj<br>[1.78]   | Drown<br>[1.08]      | Meningitis<br>[0.51]        | Iron<br>[2.04]       |
| C African Rep              | Diarrhea<br>[1.57]    | Malaria<br>[11.68]   | LRI<br>[0.84]        | PEM<br>[1.48]        | Road Inj<br>[4.59]   | Whooping<br>[1.93]          | Congenital<br>[1.18] | TB<br>[2.26]         | Measles<br>[0.55]           | Drown<br>[1.36]      |
| Congo                      | Malaria<br>[6093.11]  | Diarrhea<br>[3.73]   | HIV<br>[25.2]        | LRI<br>[0.97]        | Congenital<br>[1.34] | PEM<br>[6.15]               | Road Inj<br>[2.13]   | Drown<br>[1.36]      | Measles<br>[12.59]          | Whooping<br>[5.1]    |
| Congo DR                   | Malaria<br>[29.76]    | LRI<br>[0.6]         | Diarrhea<br>[0.43]   | Congenital<br>[1.15] | PEM<br>[0.93]        | Road Inj<br>[1.82]          | Whooping<br>[1.15]   | Drown<br>[0.99]      | TB<br>[1.43]                | Meningitis<br>[0.41] |
| Eq Guinea                  | Malaria<br>[27791.16] | HIV<br>[21.75]       | Diarrhea<br>[2.51]   | Measles<br>[42.63]   | Congenital<br>[0.96] | LRI<br>[0.68]               | Road Inj<br>[1.52]   | Drown<br>[1.14]      | PEM<br>[6.48]               | Neonatal<br>[0.94]   |

**eFigure 7c. Leading ten causes of DALYs with the ratio of observed DALYs to DALYs expected on the basis of Socio-Demographic Index alone in 2017, 1-4 years, both sexes combined.** The top ten causes contributing to DALYs are listed globally, by socio-demographic quintile, and then by GBD superregion, region, country, and subnationally where modeled. For each cell, the ratio of observed DALYs to DALYs expected on the basis of socio-demographic index (SDI) alone are listed. Abbreviations: DALY=disability-adjusted life year, GBD=Global Burden of Disease.

Values shown in brackets represent the ratio of observed DALYs to predicted DALYs on the basis of Socio-Demographic Index (SDI), rounded to two (2) digits. Color ranges (shown below) were calculated to place a roughly equal number of cells into each bin.

| COLOR KEY:                 |                      | [0.0-0.5]          | (0.5-0.72]            | (0.72-0.86]          | (0.86-0.97]          | (0.97-1.1]           | (1.1-1.23]           | (1.23-1.41]          | (1.41-2.15]          | 2.15+                |
|----------------------------|----------------------|--------------------|-----------------------|----------------------|----------------------|----------------------|----------------------|----------------------|----------------------|----------------------|
|                            | 1                    | 2                  | 3                     | 4                    | 5                    | 6                    | 7                    | 8                    | 9                    | 10                   |
| Gabon                      | Malaria<br>[38826.8] | Diarrhea<br>[3.4]  | Congenital<br>[1.13]  | LRI<br>[1.03]        | Road Inj<br>[2.25]   | Measles<br>[50.37]   | Drown<br>[1.52]      | Neonatal<br>[1.35]   | PEM<br>[11.18]       | Iron<br>[4.2]        |
| Eastern Sub-Saharan Africa | Diarrhea<br>[0.54]   | LRI<br>[0.4]       | Malaria<br>[10.27]    | PEM<br>[0.95]        | Congenital<br>[0.73] | Measles<br>[0.51]    | Whooping<br>[0.84]   | HIV<br>[3.65]        | Meningitis<br>[0.42] | TB<br>[0.74]         |
| Burundi                    | Malaria<br>[4.64]    | Diarrhea<br>[0.38] | LRI<br>[0.35]         | PEM<br>[0.84]        | Congenital<br>[1.01] | Measles<br>[0.33]    | TB<br>[0.75]         | Meningitis<br>[0.34] | Drown<br>[0.32]      | Whooping<br>[0.3]    |
| Comoros                    | Diarrhea<br>[0.39]   | LRI<br>[0.23]      | Congenital<br>[0.51]  | PEM<br>[0.63]        | Whooping<br>[0.88]   | Measles<br>[0.5]     | Neonatal<br>[1.11]   | Meningitis<br>[0.21] | Vit A<br>[0.72]      | Iron<br>[0.59]       |
| Djibouti                   | LRI<br>[0.5]         | Diarrhea<br>[0.63] | PEM<br>[2.13]         | Congenital<br>[0.8]  | Whooping<br>[1.83]   | Neonatal<br>[1.11]   | Meningitis<br>[0.37] | Iron<br>[1.28]       | TB<br>[1.1]          | Drown<br>[0.28]      |
| Eritrea                    | Diarrhea<br>[1.0]    | LRI<br>[0.69]      | PEM<br>[1.83]         | Congenital<br>[1.02] | Meningitis<br>[0.58] | TB<br>[1.66]         | Oth Un Inf<br>[3.44] | Neonatal<br>[1.26]   | Drown<br>[0.42]      | Iron<br>[1.15]       |
| Ethiopia                   | Diarrhea<br>[0.42]   | LRI<br>[0.26]      | PEM<br>[0.5]          | Whooping<br>[0.82]   | Measles<br>[0.26]    | Congenital<br>[0.35] | Meningitis<br>[0.31] | Iron<br>[0.9]        | TB<br>[0.39]         | Neonatal<br>[0.94]   |
| Kenya                      | Diarrhea<br>[1.32]   | LRI<br>[0.5]       | PEM<br>[1.75]         | Congenital<br>[0.56] | iNTS<br>[10.78]      | HIV<br>[4.87]        | Malaria<br>[100.85]  | Neonatal<br>[1.14]   | Whooping<br>[1.17]   | Meningitis<br>[0.39] |
| Baringo                    | Diarrhea<br>[0.71]   | LRI<br>[0.26]      | PEM<br>[0.76]         | iNTS<br>[6.47]       | Congenital<br>[0.36] | Leish<br>[18.44]     | Neonatal<br>[1.04]   | Vit A<br>[1.07]      | Measles<br>[0.31]    | Meningitis<br>[0.2]  |
| Bomet                      | Diarrhea<br>[0.42]   | HIV<br>[5.84]      | Neonatal<br>[1.19]    | iNTS<br>[5.6]        | LRI<br>[0.09]        | Congenital<br>[0.19] | Vit A<br>[0.79]      | PEM<br>[0.36]        | Dermatitis<br>[1.03] | Iron<br>[0.45]       |
| Bungoma                    | Diarrhea<br>[1.21]   | LRI<br>[0.44]      | PEM<br>[1.29]         | iNTS<br>[11.22]      | Malaria<br>[65.67]   | Congenital<br>[0.55] | Whooping<br>[1.29]   | Meningitis<br>[0.36] | Neonatal<br>[1.12]   | Measles<br>[0.64]    |
| Busia                      | Diarrhea<br>[0.66]   | Malaria<br>[67.8]  | LRI<br>[0.25]         | iNTS<br>[7.73]       | PEM<br>[0.59]        | Congenital<br>[0.37] | Whooping<br>[0.7]    | Neonatal<br>[1.06]   | Meningitis<br>[0.21] | Measles<br>[0.31]    |
| Elgeyo-Marakwet            | Diarrhea<br>[0.99]   | LRI<br>[0.26]      | iNTS<br>[9.33]        | PEM<br>[1.06]        | Congenital<br>[0.36] | Neonatal<br>[1.2]    | Whooping<br>[0.95]   | Measles<br>[0.85]    | Meningitis<br>[0.21] | Dermatitis<br>[1.03] |
| Embu                       | Diarrhea<br>[2.13]   | LRI<br>[0.53]      | PEM<br>[2.43]         | Congenital<br>[0.62] | iNTS<br>[12.59]      | Neonatal<br>[1.26]   | Meningitis<br>[0.45] | Whooping<br>[1.7]    | Measles<br>[1.98]    | HIV<br>[2.74]        |
| Garissa                    | Diarrhea<br>[0.15]   | iNTS<br>[2.9]      | LRI<br>[0.07]         | HIV<br>[1.95]        | Neonatal<br>[1.05]   | Congenital<br>[0.15] | Measles<br>[0.07]    | PEM<br>[0.08]        | Vit A<br>[0.57]      | Whooping<br>[0.16]   |
| HomaBay                    | LRI<br>[0.87]        | Diarrhea<br>[1.02] | HIV<br>[17.89]        | PEM<br>[1.68]        | Congenital<br>[1.03] | Malaria<br>[29.57]   | iNTS<br>[11.24]      | Meningitis<br>[0.7]  | TB<br>[1.49]         | Whooping<br>[0.67]   |
| Isiolo                     | LRI<br>[0.35]        | Diarrhea<br>[0.28] | PEM<br>[0.6]          | Congenital<br>[0.46] | Whooping<br>[0.72]   | iNTS<br>[4.37]       | Measles<br>[0.27]    | Conflict<br>[146.44] | Meningitis<br>[0.27] | Iron<br>[1.08]       |
| Kajiado                    | Diarrhea<br>[0.92]   | LRI<br>[0.31]      | iNTS<br>[9.8]         | Neonatal<br>[1.3]    | Whooping<br>[2.31]   | Congenital<br>[0.4]  | Iron<br>[2.07]       | Vit A<br>[1.93]      | PEM<br>[1.27]        | Meningitis<br>[0.3]  |
| Kakamega                   | Diarrhea<br>[1.19]   | LRI<br>[0.58]      | PEM<br>[1.5]          | Malaria<br>[44.11]   | Congenital<br>[0.69] | iNTS<br>[8.96]       | Meningitis<br>[0.46] | Whooping<br>[0.88]   | HIV<br>[2.3]         | Neonatal<br>[1.01]   |
| Kericho                    | Diarrhea<br>[1.3]    | LRI<br>[0.39]      | iNTS<br>[16.94]       | PEM<br>[1.49]        | Congenital<br>[0.5]  | HIV<br>[4.29]        | Neonatal<br>[1.31]   | Whooping<br>[1.24]   | Meningitis<br>[0.31] | Measles<br>[0.98]    |
| Kiambu                     | Diarrhea<br>[2.69]   | LRI<br>[0.86]      | Congenital<br>[0.85]  | PEM<br>[5.09]        | iNTS<br>[17.82]      | Whooping<br>[6.71]   | Neonatal<br>[1.4]    | Meningitis<br>[0.8]  | Measles<br>[6.38]    | Other MN<br>[2.3]    |
| Kilifi                     | Diarrhea<br>[1.32]   | LRI<br>[0.4]       | PEM<br>[1.26]         | Congenital<br>[0.51] | HIV<br>[3.06]        | Whooping<br>[0.8]    | Malaria<br>[24.15]   | Neonatal<br>[1.06]   | Meningitis<br>[0.31] | Measles<br>[0.49]    |
| Kirinyaga                  | Diarrhea<br>[2.98]   | LRI<br>[1.1]       | Congenital<br>[1.19]  | PEM<br>[4.33]        | Meningitis<br>[0.9]  | iNTS<br>[13.89]      | Neonatal<br>[1.33]   | Malaria<br>[248.3]   | Measles<br>[2.11]    | TB<br>[2.2]          |
| Kisii                      | Diarrhea<br>[1.45]   | LRI<br>[0.3]       | iNTS<br>[13.66]       | PEM<br>[1.3]         | Congenital<br>[0.4]  | Neonatal<br>[1.07]   | Vit A<br>[0.95]      | Meningitis<br>[0.22] | Measles<br>[0.9]     | Dermatitis<br>[1.03] |
| Kisumu                     | LRI<br>[0.84]        | HIV<br>[15.01]     | iNTS<br>[30.19]       | Diarrhea<br>[0.95]   | Congenital<br>[1.22] | Malaria<br>[313.76]  | PEM<br>[2.58]        | Meningitis<br>[0.79] | Whooping<br>[2.29]   | TB<br>[2.24]         |
| Kitui                      | Diarrhea<br>[0.92]   | LRI<br>[0.23]      | iNTS<br>[8.17]        | PEM<br>[0.78]        | HIV<br>[3.58]        | Congenital<br>[0.33] | Whooping<br>[0.81]   | Neonatal<br>[1.18]   | Measles<br>[0.43]    | Meningitis<br>[0.19] |
| Kwale                      | Diarrhea<br>[0.41]   | iNTS<br>[7.78]     | LRI<br>[0.13]         | Malaria<br>[27.03]   | Neonatal<br>[1.07]   | PEM<br>[0.43]        | Congenital<br>[0.24] | HIV<br>[1.62]        | Whooping<br>[0.43]   | Vit A<br>[0.77]      |
| Laikipia                   | Diarrhea<br>[1.72]   | HIV<br>[10.55]     | LRI<br>[0.32]         | Neonatal<br>[1.34]   | Congenital<br>[0.41] | iNTS<br>[9.87]       | PEM<br>[1.74]        | Whooping<br>[1.41]   | Meningitis<br>[0.28] | Dermatitis<br>[1.02] |
| Lamu                       | Diarrhea<br>[0.91]   | LRI<br>[0.64]      | Conflict<br>[1198.31] | PEM<br>[1.83]        | Congenital<br>[0.88] | iNTS<br>[13.17]      | Whooping<br>[1.85]   | Meningitis<br>[0.61] | Malaria<br>[30.72]   | Measles<br>[0.76]    |
| Machakos                   | Diarrhea<br>[2.46]   | LRI<br>[0.43]      | iNTS<br>[17.56]       | HIV<br>[8.19]        | PEM<br>[1.83]        | Congenital<br>[0.51] | Neonatal<br>[1.26]   | Whooping<br>[1.54]   | Measles<br>[1.65]    | Meningitis<br>[0.37] |

**eFigure 7c. Leading ten causes of DALYs with the ratio of observed DALYs to DALYs expected on the basis of Socio-Demographic Index alone in 2017, 1-4 years, both sexes combined.** The top ten causes contributing to DALYs are listed globally, by socio-demographic quintile, and then by GBD superregion, region, country, and subnationally where modeled. For each cell, the ratio of observed DALYs to DALYs expected on the basis of socio-demographic index (SDI) alone are listed. Abbreviations: DALY=disability-adjusted life year, GBD=Global Burden of Disease.

Values shown in brackets represent the ratio of observed DALYs to predicted DALYs on the basis of Socio-Demographic Index (SDI), rounded to two (2) digits. Color ranges (shown below) were calculated to place a roughly equal number of cells into each bin.

| COLOR KEY:   |                     | [0.0-0.5]            | [0.5-0.72]           | [0.72-0.86]          | [0.86-0.97]          | [0.97-1.1]           | [1.1-1.23]           | [1.23-1.41]          | [1.41-2.15]                | 2.15+                |
|--------------|---------------------|----------------------|----------------------|----------------------|----------------------|----------------------|----------------------|----------------------|----------------------------|----------------------|
|              | 1                   | 2                    | 3                    | 4                    | 5                    | 6                    | 7                    | 8                    | 9                          | 10                   |
| Makueni      | HIV<br>[4.89]       | Diarrhea<br>[0.27]   | Neonatal<br>[1.11]   | iNTS<br>[2.85]       | Congenital<br>[0.15] | Dermatitis<br>[1.04] | LRI<br>[0.04]        | Vit A<br>[0.44]      | Typh + Paratyph<br>[4.15]  | Whooping<br>[0.22]   |
| Mandera      | Diarrhea<br>[0.31]  | LRI<br>[0.27]        | PEM<br>[0.36]        | Measles<br>[0.12]    | iNTS<br>[2.16]       | HIV<br>[2.54]        | Congenital<br>[0.25] | Meningitis<br>[0.19] | Vit A<br>[0.91]            | Whooping<br>[0.22]   |
| Marsabit     | Diarrhea<br>[0.33]  | LRI<br>[0.17]        | PEM<br>[0.4]         | HIV<br>[3.83]        | iNTS<br>[2.69]       | Measles<br>[0.15]    | Congenital<br>[0.22] | Neonatal<br>[1.07]   | Whooping<br>[0.29]         | Meningitis<br>[0.13] |
| Meru         | Diarrhea<br>[2.64]  | LRI<br>[0.92]        | PEM<br>[3.51]        | Congenital<br>[0.99] | HIV<br>[9.61]        | iNTS<br>[11.65]      | Meningitis<br>[0.72] | Whooping<br>[1.87]   | Neonatal<br>[1.29]         | Malaria<br>[124.06]  |
| Migori       | Diarrhea<br>[1.22]  | LRI<br>[0.77]        | HIV<br>[13.92]       | PEM<br>[1.54]        | Malaria<br>[23.53]   | Congenital<br>[0.88] | iNTS<br>[8.69]       | Meningitis<br>[0.59] | TB<br>[1.19]               | Measles<br>[0.39]    |
| Mombasa      | Diarrhea<br>[3.01]  | LRI<br>[0.91]        | iNTS<br>[33.22]      | Congenital<br>[0.94] | PEM<br>[5.6]         | Whooping<br>[5.16]   | Meningitis<br>[0.83] | Neonatal<br>[1.22]   | Measles<br>[4.24]          | Malaria<br>[395.23]  |
| Murang'a     | LRI<br>[0.63]       | Congenital<br>[0.93] | Whooping<br>[4.34]   | iNTS<br>[15.86]      | Meningitis<br>[0.75] | Diarrhea<br>[0.47]   | HIV<br>[5.5]         | PEM<br>[1.77]        | Neonatal<br>[1.31]         | Measles<br>[1.95]    |
| Nairobi      | LRI<br>[1.23]       | Diarrhea<br>[2.97]   | Congenital<br>[0.78] | Neonatal<br>[1.42]   | PEM<br>[17.08]       | iNTS<br>[17.46]      | Meningitis<br>[1.13] | Dermatitis<br>[1.15] | Other MN<br>[2.28]         | Whooping<br>[10.62]  |
| Nakuru       | Diarrhea<br>[1.64]  | LRI<br>[0.53]        | PEM<br>[2.66]        | Congenital<br>[0.62] | Neonatal<br>[1.38]   | iNTS<br>[9.22]       | Meningitis<br>[0.44] | Whooping<br>[1.57]   | Typh + Paratyph<br>[27.56] | Dermatitis<br>[1.02] |
| Nandi        | Diarrhea<br>[0.75]  | iNTS<br>[10.87]      | LRI<br>[0.19]        | Neonatal<br>[1.23]   | HIV<br>[3.21]        | Congenital<br>[0.3]  | PEM<br>[0.71]        | Dermatitis<br>[1.03] | Measles<br>[0.56]          | Malaria<br>[36.85]   |
| Narok        | Diarrhea<br>[0.15]  | Neonatal<br>[1.15]   | Vit A<br>[1.05]      | LRI<br>[0.05]        | iNTS<br>[2.03]       | Congenital<br>[0.14] | Iron<br>[0.49]       | PEM<br>[0.11]        | Dermatitis<br>[1.06]       | Measles<br>[0.09]    |
| Nyamira      | Diarrhea<br>[1.05]  | iNTS<br>[11.94]      | Neonatal<br>[1.19]   | LRI<br>[0.19]        | Congenital<br>[0.29] | PEM<br>[1.0]         | HIV<br>[2.48]        | Dermatitis<br>[1.03] | Typh + Paratyph<br>[17.53] | Meningitis<br>[0.17] |
| Nyandarua    | Diarrhea<br>[1.71]  | LRI<br>[0.52]        | PEM<br>[2.39]        | Whooping<br>[3.26]   | Congenital<br>[0.58] | Neonatal<br>[1.35]   | iNTS<br>[8.28]       | Meningitis<br>[0.45] | Measles<br>[1.45]          | Dermatitis<br>[1.02] |
| Nyeri        | LRI<br>[0.85]       | Diarrhea<br>[1.69]   | Congenital<br>[0.92] | PEM<br>[4.27]        | Whooping<br>[6.43]   | Meningitis<br>[0.87] | iNTS<br>[12.55]      | Neonatal<br>[1.35]   | HIV<br>[3.62]              | Measles<br>[3.18]    |
| Samburu      | Diarrhea<br>[0.2]   | HIV<br>[5.18]        | LRI<br>[0.07]        | PEM<br>[0.15]        | iNTS<br>[1.86]       | Measles<br>[0.09]    | Neonatal<br>[1.06]   | Whooping<br>[0.23]   | Vit A<br>[0.83]            | Congenital<br>[0.13] |
| Siaya        | Malaria<br>[207.06] | Diarrhea<br>[1.1]    | LRI<br>[0.59]        | Congenital<br>[0.77] | iNTS<br>[9.86]       | PEM<br>[1.0]         | HIV<br>[5.18]        | Meningitis<br>[0.44] | Neonatal<br>[0.88]         | Vit A<br>[1.13]      |
| TaitaTaveta  | Diarrhea<br>[1.89]  | LRI<br>[0.82]        | PEM<br>[3.8]         | HIV<br>[11.26]       | Congenital<br>[0.97] | iNTS<br>[21.21]      | Whooping<br>[2.8]    | Meningitis<br>[0.73] | Neonatal<br>[1.25]         | Malaria<br>[197.48]  |
| TanaRiver    | LRI<br>[0.58]       | Diarrhea<br>[0.6]    | PEM<br>[1.31]        | HIV<br>[8.74]        | iNTS<br>[8.37]       | Congenital<br>[0.67] | Whooping<br>[0.8]    | Measles<br>[0.37]    | Meningitis<br>[0.45]       | TB<br>[0.87]         |
| TharakaNithi | Diarrhea<br>[5.14]  | LRI<br>[1.22]        | PEM<br>[6.38]        | Congenital<br>[1.22] | iNTS<br>[22.6]       | Meningitis<br>[0.94] | Whooping<br>[2.64]   | Measles<br>[2.88]    | Neonatal<br>[1.18]         | Malaria<br>[201.94]  |
| TransNzoia   | Diarrhea<br>[1.66]  | LRI<br>[0.56]        | HIV<br>[10.99]       | PEM<br>[1.87]        | iNTS<br>[11.65]      | Congenital<br>[0.6]  | Whooping<br>[1.48]   | Meningitis<br>[0.45] | Neonatal<br>[1.2]          | Malaria<br>[59.27]   |
| Turkana      | Diarrhea<br>[0.31]  | LRI<br>[0.18]        | PEM<br>[0.35]        | HIV<br>[4.04]        | iNTS<br>[1.81]       | Congenital<br>[0.25] | Malaria<br>[0.26]    | Measles<br>[0.08]    | Meningitis<br>[0.16]       | Whooping<br>[0.23]   |
| UasinGishu   | Diarrhea<br>[2.1]   | LRI<br>[0.42]        | Congenital<br>[0.5]  | iNTS<br>[10.96]      | PEM<br>[1.94]        | Neonatal<br>[1.23]   | Whooping<br>[1.7]    | Dermatitis<br>[1.44] | Meningitis<br>[0.34]       | Vit A<br>[0.92]      |
| Vihiga       | Diarrhea<br>[0.43]  | LRI<br>[0.18]        | Malaria<br>[54.98]   | Neonatal<br>[1.09]   | Congenital<br>[0.3]  | PEM<br>[0.52]        | iNTS<br>[4.35]       | Vit A<br>[1.05]      | Typh + Paratyph<br>[7.92]  | Meningitis<br>[0.17] |
| Wajir        | Diarrhea<br>[0.13]  | Measles<br>[0.1]     | iNTS<br>[1.78]       | LRI<br>[0.06]        | Whooping<br>[0.23]   | PEM<br>[0.07]        | Neonatal<br>[0.98]   | Congenital<br>[0.13] | Vit A<br>[0.63]            | Tetanus<br>[1.23]    |
| WestPokot    | Diarrhea<br>[0.63]  | LRI<br>[0.18]        | PEM<br>[0.48]        | iNTS<br>[4.57]       | Leish<br>[10.23]     | Whooping<br>[0.43]   | Neonatal<br>[1.1]    | Measles<br>[0.19]    | Congenital<br>[0.23]       | Vit A<br>[0.96]      |
| Madagascar   | Diarrhea<br>[0.77]  | PEM<br>[1.57]        | LRI<br>[0.38]        | Measles<br>[0.33]    | Congenital<br>[0.55] | Malaria<br>[1.3]     | Whooping<br>[0.45]   | Meningitis<br>[0.27] | Neonatal<br>[1.24]         | Oth Un Inf<br>[2.25] |
| Malawi       | Malaria<br>[5.77]   | Diarrhea<br>[0.3]    | LRI<br>[0.29]        | HIV<br>[9.17]        | Congenital<br>[0.81] | PEM<br>[0.61]        | Measles<br>[0.38]    | Meningitis<br>[0.43] | Whooping<br>[0.61]         | TB<br>[0.53]         |
| Mozambique   | Malaria<br>[6.78]   | HIV<br>[16.11]       | Diarrhea<br>[0.22]   | Congenital<br>[0.74] | LRI<br>[0.17]        | PEM<br>[0.31]        | Meningitis<br>[0.25] | TB<br>[0.54]         | iNTS<br>[2.11]             | Measles<br>[0.12]    |
| Rwanda       | LRI<br>[0.41]       | Diarrhea<br>[0.43]   | Congenital<br>[0.95] | PEM<br>[1.04]        | Malaria<br>[14.13]   | Meningitis<br>[0.45] | TB<br>[0.76]         | Road Inj<br>[0.52]   | Neonatal<br>[1.01]         | Drown<br>[0.3]       |

**eFigure 7c. Leading ten causes of DALYs with the ratio of observed DALYs to DALYs expected on the basis of Socio-Demographic Index alone in 2017, 1-4 years, both sexes combined.** The top ten causes contributing to DALYs are listed globally, by socio-demographic quintile, and then by GBD superregion, region, country, and subnationally where modeled. For each cell, the ratio of observed DALYs to DALYs expected on the basis of socio-demographic index (SDI) alone are listed. Abbreviations: DALY=disability-adjusted life year, GBD=Global Burden of Disease.

Values shown in brackets represent the ratio of observed DALYs to predicted DALYs on the basis of Socio-Demographic Index (SDI), rounded to two (2) digits. Color ranges (shown below) were calculated to place a roughly equal number of cells into each bin.

| COLOR KEY:                  |                      | [0.0-0.5]          | [0.5-0.72]           | [0.72-0.86]          | [0.86-0.97]          | [0.97-1.1]                    | [1.1-1.23]                     | [1.23-1.41]          | [1.41-2.15]          | 2.15+                |
|-----------------------------|----------------------|--------------------|----------------------|----------------------|----------------------|-------------------------------|--------------------------------|----------------------|----------------------|----------------------|
|                             | 1                    | 2                  | 3                    | 4                    | 5                    | 6                             | 7                              | 8                    | 9                    | 10                   |
| Somalia                     | Measles<br>[0.61]    | Whooping<br>[2.16] | Diarrhea<br>[0.25]   | LRI<br>[0.28]        | PEM<br>[0.37]        | Conflict<br>Terror<br>[51.23] | Meningitis<br>[0.35]           | Congenital<br>[0.33] | TB<br>[0.41]         | Road Inj<br>[0.43]   |
| S Sudan                     | Diarrhea<br>[0.68]   | LRI<br>[0.71]      | PEM<br>[0.77]        | Malaria<br>[1.12]    | Measles<br>[0.36]    | Meningitis<br>[0.71]          | Conflict<br>Terror<br>[106.82] | Leish<br>[6.56]      | Congenital<br>[0.47] | TB<br>[0.74]         |
| Tanzania                    | LRI<br>[0.59]        | Malaria<br>[27.85] | Congenital<br>[1.44] | PEM<br>[1.09]        | Diarrhea<br>[0.26]   | Meningitis<br>[0.39]          | Whooping<br>[0.66]             | TB<br>[1.13]         | Drown<br>[0.39]      | Neonatal<br>[1.06]   |
| Uganda                      | Malaria<br>[30.59]   | Diarrhea<br>[0.29] | LRI<br>[0.24]        | Congenital<br>[0.73] | PEM<br>[0.56]        | Meningitis<br>[0.54]          | HIV<br>[3.85]                  | Whooping<br>[0.65]   | Measles<br>[0.32]    | TB<br>[0.63]         |
| Zambia                      | Diarrhea<br>[1.14]   | HIV<br>[17.17]     | LRI<br>[0.66]        | Malaria<br>[201.61]  | PEM<br>[2.93]        | Congenital<br>[1.32]          | Meningitis<br>[0.75]           | TB<br>[1.97]         | Drown<br>[0.5]       | Iron<br>[1.35]       |
| Southern Sub-Saharan Africa | Diarrhea<br>[5.74]   | LRI<br>[1.45]      | PEM<br>[25.43]       | HIV<br>[15.85]       | TB<br>[15.42]        | Congenital<br>[0.46]          | Neonatal<br>[1.03]             | Measles<br>[24.03]   | Road Inj<br>[0.98]   | Dermatitis<br>[1.19] |
|                             | Diarrhea<br>[8.77]   | LRI<br>[1.27]      | PEM<br>[23.06]       | Neonatal<br>[1.14]   | Congenital<br>[0.36] | Road Inj<br>[0.83]            | HIV<br>[6.98]                  | TB<br>[11.34]        | Dermatitis<br>[1.17] | Vit A<br>[1.31]      |
|                             | Diarrhea<br>[2.05]   | HIV<br>[14.02]     | LRI<br>[0.56]        | PEM<br>[2.52]        | TB<br>[3.48]         | Road Inj<br>[0.71]            | Congenital<br>[0.3]            | Measles<br>[0.95]    | Neonatal<br>[0.82]   | Iron<br>[1.15]       |
|                             | Diarrhea<br>[5.94]   | HIV<br>[28.7]      | LRI<br>[1.13]        | PEM<br>[12.92]       | TB<br>[10.11]        | Neonatal<br>[1.04]            | Road Inj<br>[0.93]             | Congenital<br>[0.39] | Iron<br>[2.52]       | Dermatitis<br>[1.24] |
| Botswana                    | Diarrhea<br>[8.77]   | LRI<br>[1.27]      | PEM<br>[23.06]       | Neonatal<br>[1.14]   | Congenital<br>[0.36] | Road Inj<br>[0.83]            | HIV<br>[6.98]                  | TB<br>[11.34]        | Dermatitis<br>[1.17] | Vit A<br>[1.31]      |
| Lesotho                     | Diarrhea<br>[2.05]   | HIV<br>[14.02]     | LRI<br>[0.56]        | PEM<br>[2.52]        | TB<br>[3.48]         | Road Inj<br>[0.71]            | Congenital<br>[0.3]            | Measles<br>[0.95]    | Neonatal<br>[0.82]   | Iron<br>[1.15]       |
| Namibia                     | Diarrhea<br>[5.94]   | HIV<br>[28.7]      | LRI<br>[1.13]        | PEM<br>[12.92]       | TB<br>[10.11]        | Neonatal<br>[1.04]            | Road Inj<br>[0.93]             | Congenital<br>[0.39] | Iron<br>[2.52]       | Dermatitis<br>[1.24] |
| S Africa                    | Diarrhea<br>[6.37]   | LRI<br>[1.43]      | HIV<br>[22.39]       | PEM<br>[22.01]       | Road Inj<br>[1.37]   | Measles<br>[55.41]            | Neonatal<br>[1.13]             | Congenital<br>[0.51] | TB<br>[16.34]        | Violence<br>[3.83]   |
| Swaziland                   | Diarrhea<br>[4.02]   | LRI<br>[0.71]      | HIV<br>[13.28]       | PEM<br>[5.81]        | TB<br>[5.3]          | Road Inj<br>[0.8]             | Congenital<br>[0.33]           | Neonatal<br>[0.86]   | Dermatitis<br>[1.3]  | Meningitis<br>[0.33] |
| Zimbabwe                    | PEM<br>[3.57]        | LRI<br>[0.57]      | Diarrhea<br>[0.79]   | TB<br>[3.0]          | Malaria<br>[45.85]   | HIV<br>[2.9]                  | Whooping<br>[0.75]             | Congenital<br>[0.29] | Meningitis<br>[0.32] | Measles<br>[0.49]    |
| Western Sub-Saharan Africa  | Malaria<br>[307.59]  | Diarrhea<br>[1.8]  | LRI<br>[1.28]        | Meningitis<br>[1.67] | PEM<br>[2.04]        | Measles<br>[1.54]             | Congenital<br>[0.84]           | iNTS<br>[11.58]      | Whooping<br>[1.16]   | TB<br>[1.96]         |
|                             | Malaria<br>[32.59]   | Diarrhea<br>[0.69] | LRI<br>[0.53]        | PEM<br>[0.91]        | Measles<br>[0.6]     | Congenital<br>[0.7]           | iNTS<br>[7.14]                 | Meningitis<br>[0.61] | Whooping<br>[0.83]   | Road Inj<br>[1.14]   |
|                             | Malaria<br>[7.23]    | LRI<br>[0.52]      | Diarrhea<br>[0.35]   | iNTS<br>[7.77]       | PEM<br>[0.59]        | Meningitis<br>[0.84]          | Congenital<br>[0.92]           | Hemog<br>[4.46]      | Drown<br>[0.55]      | Iron<br>[1.82]       |
|                             | Malaria<br>[935.54]  | Diarrhea<br>[1.87] | LRI<br>[0.71]        | PEM<br>[1.65]        | Congenital<br>[0.72] | Meningitis<br>[0.64]          | iNTS<br>[8.68]                 | HIV<br>[3.43]        | Whooping<br>[0.95]   | Drown<br>[0.42]      |
| Cape Verde                  | Neonatal<br>[1.45]   | LRI<br>[0.21]      | Congenital<br>[0.37] | Drown<br>[0.49]      | Iron<br>[1.44]       | Diarrhea<br>[0.23]            | Violence<br>[1.87]             | iNTS<br>[4.08]       | Dermatitis<br>[0.83] | Epilepsy<br>[1.08]   |
| Chad                        | Diarrhea<br>[1.17]   | LRI<br>[0.73]      | Malaria<br>[1.07]    | PEM<br>[0.69]        | Meningitis<br>[0.74] | Measles<br>[0.19]             | Congenital<br>[0.49]           | Whooping<br>[0.58]   | TB<br>[0.63]         | iNTS<br>[2.11]       |
| Cote d'Ivoire               | Malaria<br>[67.82]   | Diarrhea<br>[0.97] | LRI<br>[0.59]        | PEM<br>[1.03]        | Congenital<br>[0.77] | iNTS<br>[9.25]                | Meningitis<br>[0.54]           | HIV<br>[3.66]        | Whooping<br>[0.66]   | Drown<br>[0.49]      |
| Gambia                      | Diarrhea<br>[0.52]   | LRI<br>[0.38]      | Hemog<br>[10.1]      | PEM<br>[0.95]        | Congenital<br>[0.52] | Meningitis<br>[0.5]           | Whooping<br>[0.79]             | iNTS<br>[4.86]       | Iron<br>[1.77]       | Neonatal<br>[1.28]   |
| Ghana                       | Malaria<br>[2769.22] | Diarrhea<br>[1.55] | LRI<br>[0.54]        | PEM<br>[3.2]         | Congenital<br>[0.67] | Meningitis<br>[0.77]          | Hemog<br>[6.62]                | iNTS<br>[9.27]       | Neonatal<br>[1.08]   | Iron<br>[1.84]       |
| Guinea                      | Malaria<br>[10.38]   | LRI<br>[0.67]      | Diarrhea<br>[0.35]   | PEM<br>[0.85]        | iNTS<br>[6.66]       | Meningitis<br>[0.71]          | Congenital<br>[0.73]           | Whooping<br>[1.03]   | Measles<br>[0.32]    | TB<br>[0.78]         |
| Guinea-Bissau               | Diarrhea<br>[0.76]   | Measles<br>[1.21]  | LRI<br>[0.36]        | Hemog<br>[8.32]      | PEM<br>[0.64]        | Congenital<br>[0.64]          | Meningitis<br>[0.6]            | Whooping<br>[0.84]   | Malaria<br>[1.54]    | Iron<br>[1.35]       |
| Liberia                     | Malaria<br>[5.47]    | Diarrhea<br>[0.42] | Measles<br>[0.73]    | LRI<br>[0.26]        | Whooping<br>[0.88]   | PEM<br>[0.41]                 | Congenital<br>[0.45]           | iNTS<br>[3.66]       | Meningitis<br>[0.36] | Hemog<br>[2.65]      |
| Mali                        | Malaria<br>[4.58]    | PEM<br>[1.11]      | Diarrhea<br>[0.38]   | LRI<br>[0.4]         | iNTS<br>[8.54]       | Congenital<br>[0.97]          | Meningitis<br>[0.76]           | Whooping<br>[0.85]   | Measles<br>[0.17]    | Drown<br>[0.76]      |
| Mauritania                  | Diarrhea<br>[0.85]   | PEM<br>[2.0]       | LRI<br>[0.32]        | Iron<br>[1.83]       | Whooping<br>[1.01]   | Congenital<br>[0.33]          | Neonatal<br>[1.14]             | Malaria<br>[31.54]   | Vit A<br>[1.32]      | Meningitis<br>[0.28] |
| Niger                       | Malaria<br>[1.47]    | Diarrhea<br>[0.51] | LRI<br>[0.51]        | Meningitis<br>[1.35] | PEM<br>[0.21]        | Measles<br>[0.11]             | Congenital<br>[0.59]           | iNTS<br>[2.46]       | Whooping<br>[0.53]   | TB<br>[0.36]         |
| Nigeria                     | Malaria<br>[1941.47] | LRI<br>[2.36]      | Diarrhea<br>[3.54]   | Meningitis<br>[2.98] | Measles<br>[6.15]    | PEM<br>[3.84]                 | Congenital<br>[0.9]            | TB<br>[4.54]         | iNTS<br>[14.2]       | HIV<br>[7.04]        |
| Sao Tome Principe           | Other MN<br>[5.13]   | Diarrhea<br>[0.27] | LRI<br>[0.17]        | Neonatal<br>[1.28]   | Congenital<br>[0.33] | PEM<br>[0.62]                 | iNTS<br>[5.03]                 | Whooping<br>[0.86]   | Oth NTD<br>[3.49]    | Vit A<br>[0.83]      |
| Senegal                     | Diarrhea<br>[0.57]   | LRI<br>[0.3]       | Congenital<br>[0.48] | Malaria<br>[3.03]    | Meningitis<br>[0.41] | PEM<br>[0.35]                 | Hemog<br>[3.08]                | Iron<br>[1.26]       | Whooping<br>[0.41]   | Neonatal<br>[1.17]   |

**eFigure 7c. Leading ten causes of DALYs with the ratio of observed DALYs to DALYs expected on the basis of Socio-Demographic Index alone in 2017, 1-4 years, both sexes combined.** The top ten causes contributing to DALYs are listed globally, by socio-demographic quintile, and then by GBD superregion, region, country, and subnationally where modeled. For each cell, the ratio of observed DALYs to DALYs expected on the basis of socio-demographic index (SDI) alone are listed. Abbreviations: DALY=disability-adjusted life year, GBD=Global Burden of Disease.

*Values shown in brackets represent the ratio of observed DALYs to predicted DALYs on the basis of Socio-Demographic Index (SDI), rounded to two (2) digits. Color ranges (shown below) were calculated to place a roughly equal number of cells into each bin.*

| COLOR KEY:   |                     | [0.0-0.5]          | (0.5-0.72]         | (0.72-0.86]    | (0.86-0.97]          | (0.97-1.1]           | (1.1-1.23]      | (1.23-1.41]          | (1.41-2.15]        | 2.15+          |
|--------------|---------------------|--------------------|--------------------|----------------|----------------------|----------------------|-----------------|----------------------|--------------------|----------------|
|              | 1                   | 2                  | 3                  | 4              | 5                    | 6                    | 7               | 8                    | 9                  | 10             |
| Sierra Leone | Malaria<br>[35.87]  | LRI<br>[0.62]      | Diarrhea<br>[0.51] | PEM<br>[1.06]  | Congenital<br>[0.94] | Meningitis<br>[0.75] | iNTS<br>[6.34]  | Drown<br>[0.54]      | Iron<br>[1.6]      | TB<br>[0.83]   |
| Togo         | Malaria<br>[125.31] | Diarrhea<br>[0.74] | LRI<br>[0.38]      | iNTS<br>[9.77] | PEM<br>[0.75]        | Congenital<br>[0.53] | Hemog<br>[4.61] | Meningitis<br>[0.34] | Whooping<br>[0.61] | Iron<br>[1.35] |

**eFigure 7d. Leading ten causes of DALYs with the ratio of observed DALYs to DALYs expected on the basis of Socio-Demographic Index alone in 2017, 5-9 years, both sexes combined.** The top ten causes contributing to DALYs are listed globally, by socio-demographic quintile, and then by GBD superregion, region, country, and subnationally where modeled. For each cell, the ratio of observed DALYs to DALYs expected on the basis of socio-demographic index (SDI) alone are listed. Abbreviations: DALY=disability-adjusted life year, GBD=Global Burden of Disease.

Values shown in brackets represent the ratio of observed DALYs to predicted DALYs on the basis of Socio-Demographic Index (SDI), rounded to two (2) digits. Color ranges (shown below) were calculated to place a roughly equal number of cells into each bin.

| COLOR KEY:                                          |                      | [0.0-0.62]           | [0.62-0.79]          | [0.79-0.89]          | [0.89-0.97]                  | [0.97-1.07]                    | [1.07-1.26]            | [1.26-1.44]            | [1.44-2.32]          | 2.32+                |
|-----------------------------------------------------|----------------------|----------------------|----------------------|----------------------|------------------------------|--------------------------------|------------------------|------------------------|----------------------|----------------------|
|                                                     | 1                    | 2                    | 3                    | 4                    | 5                            | 6                              | 7                      | 8                      | 9                    | 10                   |
| Global                                              | Iron<br>[2.11]       | Vit A<br>[1.74]      | Diarrhea<br>[2.82]   | Malaria<br>[964.64]  | Neonatal<br>[1.07]           | Typh +<br>Paratyph<br>[205.52] | Road Inj<br>[0.59]     | Congenital<br>[0.73]   | LRI<br>[1.16]        | Drown<br>[0.8]       |
| Low SDI                                             | Iron<br>[1.24]       | Malaria<br>[8.63]    | Diarrhea<br>[0.78]   | Vit A<br>[1.04]      | Typh +<br>Paratyph<br>[3.06] | HIV<br>[11.63]                 | LRI<br>[0.45]          | Road Inj<br>[0.36]     | Neonatal<br>[1.42]   | Drown<br>[0.46]      |
| Low-middle SDI                                      | Iron<br>[1.77]       | Malaria<br>[158.24]  | Vit A<br>[1.32]      | Diarrhea<br>[1.29]   | Road Inj<br>[0.5]            | Typh +<br>Paratyph<br>[16.82]  | LRI<br>[0.6]           | Neonatal<br>[1.13]     | Congenital<br>[0.69] | Drown<br>[0.46]      |
| Middle SDI                                          | Neonatal<br>[1.18]   | Drown<br>[1.05]      | Road Inj<br>[0.56]   | Iron<br>[1.07]       | Congenital<br>[0.71]         | Vit A<br>[1.14]                | Asthma<br>[0.88]       | LRI<br>[0.82]          | Dermatitis<br>[0.69] | Diarrhea<br>[1.34]   |
| High-middle SDI                                     | Neonatal<br>[1.31]   | Road Inj<br>[1.73]   | Congenital<br>[1.17] | Drown<br>[3.22]      | Asthma<br>[1.0]              | Dermatitis<br>[0.59]           | Iron<br>[3.49]         | Skin Viral<br>[0.94]   | Leukemia<br>[1.41]   | Conduct<br>[0.86]    |
| High SDI                                            | Dermatitis<br>[1.18] | Neonatal<br>[0.88]   | Asthma<br>[0.96]     | Congenital<br>[0.56] | Anxiety<br>[1.16]            | Skin Viral<br>[1.01]           | Conduct<br>[1.0]       | URI<br>[1.15]          | Road Inj<br>[0.29]   | Falls<br>[0.96]      |
| Central Europe, Eastern Europe,<br>and Central Asia | Neonatal<br>[1.35]   | Iron<br>[2.39]       | Congenital<br>[0.89] | LRI<br>[2.97]        | Road Inj<br>[0.68]           | Drown<br>[1.34]                | Dermatitis<br>[0.59]   | Falls<br>[1.49]        | Vit A<br>[1.28]      | Conduct<br>[0.92]    |
| Central Asia                                        | LRI<br>[2.95]        | Iron<br>[2.18]       | Vit A<br>[1.53]      | Road Inj<br>[0.64]   | Neonatal<br>[0.94]           | Drown<br>[1.08]                | Congenital<br>[0.75]   | Epilepsy<br>[1.47]     | Leukemia<br>[0.77]   | Dermatitis<br>[0.52] |
| Armenia                                             | Iron<br>[3.52]       | Neonatal<br>[0.96]   | Congenital<br>[0.85] | LRI<br>[1.25]        | Dermatitis<br>[0.52]         | Road Inj<br>[0.33]             | Diarrhea<br>[1.31]     | Conduct<br>[0.91]      | Epilepsy<br>[1.0]    | Brain C<br>[1.12]    |
| Azerbaijan                                          | LRI<br>[5.12]        | Congenital<br>[1.02] | Leukemia<br>[1.7]    | Neonatal<br>[0.92]   | Epilepsy<br>[2.03]           | Drown<br>[0.95]                | Iron<br>[1.07]         | Road Inj<br>[0.48]     | Vit A<br>[0.88]      | Fire<br>[2.24]       |
| Georgia                                             | Neonatal<br>[0.96]   | Congenital<br>[0.67] | Road Inj<br>[0.5]    | Iron<br>[1.08]       | Vit A<br>[1.07]              | Leukemia<br>[0.81]             | Epilepsy<br>[1.11]     | Asthma<br>[0.57]       | Conduct<br>[0.91]    | Dermatitis<br>[0.47] |
| Kazakhstan                                          | Vit A<br>[3.06]      | Road Inj<br>[1.06]   | Neonatal<br>[1.02]   | Congenital<br>[0.98] | Iron<br>[1.74]               | Drown<br>[1.54]                | Epilepsy<br>[1.36]     | LRI<br>[1.36]          | Dermatitis<br>[0.47] | Conduct<br>[0.9]     |
| Kyrgyzstan                                          | Iron<br>[1.79]       | Vit A<br>[1.2]       | Neonatal<br>[1.01]   | Road Inj<br>[0.45]   | Congenital<br>[0.6]          | LRI<br>[0.66]                  | Drown<br>[0.53]        | Epilepsy<br>[1.07]     | Dermatitis<br>[0.56] | Asthma<br>[0.54]     |
| Mongolia                                            | Road Inj<br>[1.14]   | Vit A<br>[2.03]      | Iron<br>[1.5]        | Congenital<br>[0.85] | Neonatal<br>[0.98]           | LRI<br>[1.34]                  | Drown<br>[0.82]        | Falls<br>[1.7]         | Epilepsy<br>[1.19]   | Fire<br>[1.79]       |
| Tajikistan                                          | LRI<br>[1.43]        | Drown<br>[0.91]      | Iron<br>[1.02]       | Vit A<br>[1.15]      | Congenital<br>[0.83]         | Diarrhea<br>[0.87]             | Neonatal<br>[1.05]     | Epilepsy<br>[1.56]     | Road Inj<br>[0.31]   | Dermatitis<br>[0.58] |
| Turkmenistan                                        | LRI<br>[2.97]        | Iron<br>[1.36]       | Congenital<br>[0.78] | Neonatal<br>[0.84]   | Vit A<br>[1.29]              | Drown<br>[0.84]                | Epilepsy<br>[1.3]      | Dermatitis<br>[0.52]   | Leukemia<br>[0.8]    | Road Inj<br>[0.32]   |
| Uzbekistan                                          | LRI<br>[2.71]        | Iron<br>[2.48]       | Road Inj<br>[0.58]   | Drown<br>[0.9]       | Neonatal<br>[0.9]            | Vit A<br>[0.99]                | Congenital<br>[0.51]   | Epilepsy<br>[1.33]     | Leukemia<br>[0.73]   | Dermatitis<br>[0.55] |
| Central Europe                                      | Neonatal<br>[1.39]   | Congenital<br>[0.87] | Falls<br>[1.77]      | Dermatitis<br>[0.64] | Vit A<br>[2.77]              | Diarrhea<br>[2.68]             | Asthma<br>[0.66]       | Conduct<br>[0.9]       | Iron<br>[1.98]       | Road Inj<br>[0.53]   |
| Albania                                             | Neonatal<br>[1.17]   | Congenital<br>[0.96] | Vit A<br>[1.65]      | Falls<br>[2.04]      | Road Inj<br>[0.41]           | Epilepsy<br>[1.31]             | Brain C<br>[1.5]       | Leukemia<br>[0.78]     | LRI<br>[0.85]        | Iron<br>[0.66]       |
| Bosnia                                              | Neonatal<br>[1.35]   | Vit A<br>[1.87]      | Congenital<br>[0.69] | Falls<br>[1.96]      | Dermatitis<br>[0.58]         | Iron<br>[0.83]                 | Asthma<br>[0.61]       | Conduct<br>[0.9]       | Epilepsy<br>[1.06]   | Diarrhea<br>[1.3]    |
| Bulgaria                                            | Neonatal<br>[1.24]   | Congenital<br>[0.99] | Falls<br>[1.88]      | Vit A<br>[2.07]      | Diarrhea<br>[2.27]           | Dermatitis<br>[0.52]           | Conduct<br>[0.9]       | Road Inj<br>[0.48]     | Skin Viral<br>[0.79] | Asthma<br>[0.53]     |
| Croatia                                             | Neonatal<br>[1.51]   | Congenital<br>[0.88] | Dermatitis<br>[0.54] | Diarrhea<br>[2.36]   | Road Inj<br>[0.62]           | Falls<br>[1.17]                | Conduct<br>[0.9]       | Asthma<br>[0.62]       | Vit A<br>[1.96]      | Skin Viral<br>[0.8]  |
| Czech                                               | Neonatal<br>[0.93]   | Falls<br>[2.0]       | Dermatitis<br>[0.66] | Congenital<br>[0.78] | Diarrhea<br>[3.21]           | Conduct<br>[0.91]              | Skin Viral<br>[0.81]   | Asthma<br>[0.53]       | Anxiety<br>[0.63]    | Urticaria<br>[1.65]  |
| Hungary                                             | Neonatal<br>[1.34]   | Diarrhea<br>[4.03]   | Dermatitis<br>[0.75] | Congenital<br>[0.89] | Falls<br>[1.73]              | Vit A<br>[2.02]                | Conduct<br>[0.9]       | Skin Viral<br>[0.8]    | Asthma<br>[0.51]     | Anxiety<br>[0.64]    |
| Macedonia                                           | Neonatal<br>[1.33]   | Vit A<br>[2.38]      | Iron<br>[1.79]       | Congenital<br>[0.73] | Falls<br>[1.91]              | Road Inj<br>[0.59]             | Dermatitis<br>[0.54]   | Diarrhea<br>[1.8]      | Asthma<br>[0.64]     | Conduct<br>[0.9]     |
| Montenegro                                          | Neonatal<br>[1.31]   | Vit A<br>[2.67]      | Falls<br>[1.78]      | Congenital<br>[0.7]  | Dermatitis<br>[0.56]         | Road Inj<br>[0.59]             | Iron<br>[1.57]         | Conduct<br>[0.9]       | Asthma<br>[0.58]     | Skin Viral<br>[0.79] |
| Poland                                              | Neonatal<br>[1.55]   | Congenital<br>[0.96] | Dermatitis<br>[0.73] | Falls<br>[1.65]      | Asthma<br>[0.85]             | Diarrhea<br>[2.65]             | Vit A<br>[2.68]        | Upper Digest<br>[7.33] | Conduct<br>[0.91]    | Skin Viral<br>[0.81] |
| Romania                                             | Neonatal<br>[1.43]   | Iron<br>[4.52]       | Vit A<br>[3.43]      | Congenital<br>[0.77] | Diarrhea<br>[2.93]           | Falls<br>[1.87]                | Upper Digest<br>[8.96] | Road Inj<br>[0.67]     | Dermatitis<br>[0.6]  | LRI<br>[2.56]        |
| Serbia                                              | Neonatal<br>[1.72]   | Vit A<br>[1.57]      | Congenital<br>[0.66] | Falls<br>[1.85]      | Dermatitis<br>[0.56]         | Conduct<br>[0.91]              | Diarrhea<br>[1.58]     | Skin Viral<br>[0.8]    | Anxiety<br>[0.7]     | Asthma<br>[0.44]     |

**eFigure 7d. Leading ten causes of DALYs with the ratio of observed DALYs to DALYs expected on the basis of Socio-Demographic Index alone in 2017, 5-9 years, both sexes combined.** The top ten causes contributing to DALYs are listed globally, by socio-demographic quintile, and then by GBD superregion, region, country, and subnationally where modeled. For each cell, the ratio of observed DALYs to DALYs expected on the basis of socio-demographic index (SDI) alone are listed. Abbreviations: DALY=disability-adjusted life year, GBD=Global Burden of Disease.

Values shown in brackets represent the ratio of observed DALYs to predicted DALYs on the basis of Socio-Demographic Index (SDI), rounded to two (2) digits. Color ranges (shown below) were calculated to place a roughly equal number of cells into each bin.

| COLOR KEY:               |                      | [0.0-0.62]              | [0.62-0.79]             | [0.79-0.89]            | [0.89-0.97]            | [0.97-1.07]          | [1.07-1.26]            | [1.26-1.44]          | [1.44-2.32]          | 2.32+                  |
|--------------------------|----------------------|-------------------------|-------------------------|------------------------|------------------------|----------------------|------------------------|----------------------|----------------------|------------------------|
|                          | 1                    | 2                       | 3                       | 4                      | 5                      | 6                    | 7                      | 8                    | 9                    | 10                     |
| Slovakia                 | Neonatal<br>[1.03]   | Congenital<br>[0.96]    | Falls<br>[1.72]         | Dermatitis<br>[0.66]   | Diarrhea<br>[3.45]     | Vit A<br>[3.42]      | Upper Digest<br>[7.57] | Road Inj<br>[0.66]   | Conduct<br>[0.91]    | Skin Viral<br>[0.8]    |
| Slovenia                 | Neonatal<br>[1.1]    | Falls<br>[2.01]         | Congenital<br>[0.89]    | Diarrhea<br>[3.16]     | Dermatitis<br>[0.54]   | Asthma<br>[0.76]     | Vit A<br>[2.75]        | Conduct<br>[0.92]    | Skin Viral<br>[0.81] | Upper Digest<br>[5.87] |
| Eastern Europe           | Neonatal<br>[1.62]   | Congenital<br>[0.97]    | Iron<br>[2.37]          | Upper Digest<br>[9.57] | Road Inj<br>[0.67]     | Dermatitis<br>[0.62] | Drown<br>[1.53]        | Falls<br>[1.52]      | Conduct<br>[0.94]    | Asthma<br>[0.6]        |
| Belarus                  | Neonatal<br>[1.59]   | Congenital<br>[0.94]    | Drown<br>[1.72]         | Dermatitis<br>[0.74]   | Upper Digest<br>[9.95] | Falls<br>[1.62]      | Road Inj<br>[0.56]     | Asthma<br>[0.71]     | Conduct<br>[0.9]     | Skin Viral<br>[0.8]    |
| Estonia                  | Neonatal<br>[1.69]   | Dermatitis<br>[0.91]    | Congenital<br>[1.0]     | Upper Digest<br>[10.9] | Falls<br>[1.24]        | Iron<br>[3.49]       | Conduct<br>[0.92]      | Diarrhea<br>[2.47]   | Skin Viral<br>[0.82] | Drown<br>[1.83]        |
| Latvia                   | Neonatal<br>[1.52]   | Congenital<br>[1.07]    | Upper Digest<br>[11.02] | Dermatitis<br>[0.64]   | Drown<br>[2.07]        | Falls<br>[1.35]      | Diarrhea<br>[2.38]     | Asthma<br>[0.72]     | Road Inj<br>[0.59]   | Conduct<br>[0.9]       |
| Lithuania                | Neonatal<br>[1.74]   | Upper Digest<br>[13.05] | Congenital<br>[0.89]    | Diarrhea<br>[2.81]     | Falls<br>[1.26]        | Conduct<br>[0.91]    | Skin Viral<br>[0.81]   | Asthma<br>[0.62]     | Dermatitis<br>[0.37] | Urticaria<br>[1.59]    |
| Moldova                  | Neonatal<br>[1.67]   | Iron<br>[1.67]          | Congenital<br>[0.78]    | Drown<br>[1.01]        | Upper Digest<br>[9.8]  | Road Inj<br>[0.54]   | Dermatitis<br>[0.79]   | Falls<br>[1.68]      | LRI<br>[0.84]        | Conduct<br>[0.9]       |
| Russian Federation       | Neonatal<br>[1.62]   | Congenital<br>[0.88]    | Iron<br>[2.55]          | Upper Digest<br>[9.48] | Road Inj<br>[0.72]     | Dermatitis<br>[0.62] | Drown<br>[1.54]        | Falls<br>[1.53]      | Conduct<br>[0.94]    | Diarrhea<br>[1.74]     |
| Ukraine                  | Neonatal<br>[1.6]    | Congenital<br>[1.21]    | Iron<br>[1.66]          | Upper Digest<br>[8.86] | Drown<br>[1.16]        | Dermatitis<br>[0.64] | Road Inj<br>[0.47]     | Falls<br>[1.53]      | Asthma<br>[0.69]     | Conduct<br>[0.95]      |
| High-income              | Dermatitis<br>[1.16] | Neonatal<br>[0.89]      | Asthma<br>[1.11]        | Anxiety<br>[1.08]      | Congenital<br>[0.75]   | Skin Viral<br>[1.03] | Conduct<br>[1.02]      | URI<br>[1.07]        | Road Inj<br>[0.55]   | Falls<br>[0.76]        |
| Australasia              | Asthma<br>[2.05]     | Dermatitis<br>[1.07]    | Falls<br>[2.18]         | Neonatal<br>[0.9]      | Anxiety<br>[1.15]      | Conduct<br>[1.07]    | Skin Viral<br>[1.01]   | Congenital<br>[0.66] | Road Inj<br>[0.67]   | URI<br>[0.95]          |
| Australia                | Asthma<br>[2.1]      | Dermatitis<br>[1.01]    | Falls<br>[2.08]         | Neonatal<br>[0.88]     | Anxiety<br>[1.11]      | Conduct<br>[1.07]    | Skin Viral<br>[1.01]   | Congenital<br>[0.64] | Road Inj<br>[0.6]    | URI<br>[0.94]          |
| New Zealand              | Dermatitis<br>[1.36] | Asthma<br>[1.84]        | Falls<br>[2.74]         | Neonatal<br>[1.01]     | Anxiety<br>[1.38]      | Road Inj<br>[0.94]   | Congenital<br>[0.74]   | Conduct<br>[1.09]    | Skin Viral<br>[0.98] | Mech<br>[3.65]         |
| High-income Asia Pacific | Dermatitis<br>[1.24] | Neonatal<br>[1.16]      | Asthma<br>[0.93]        | Congenital<br>[0.72]   | Skin Viral<br>[1.01]   | Falls<br>[1.1]       | Anxiety<br>[0.8]       | Conduct<br>[0.88]    | Diarrhea<br>[2.36]   | URI<br>[0.97]          |
| Brunei                   | Dermatitis<br>[1.16] | Neonatal<br>[1.13]      | Road Inj<br>[1.15]      | Iron<br>[5.03]         | Congenital<br>[0.86]   | Drown<br>[2.68]      | Asthma<br>[0.86]       | Skin Viral<br>[1.0]  | LRI<br>[4.84]        | Falls<br>[1.18]        |
| Japan                    | Dermatitis<br>[1.3]  | Neonatal<br>[1.14]      | Asthma<br>[0.94]        | Congenital<br>[0.78]   | Skin Viral<br>[1.0]    | Falls<br>[1.14]      | Conduct<br>[0.91]      | Anxiety<br>[0.78]    | Diarrhea<br>[2.22]   | URI<br>[0.99]          |
| Aichi                    | Dermatitis<br>[1.31] | Neonatal<br>[1.17]      | Asthma<br>[0.96]        | Congenital<br>[0.75]   | Skin Viral<br>[1.01]   | ASD<br>[1.98]        | Falls<br>[1.12]        | Conduct<br>[0.91]    | Anxiety<br>[0.78]    | Diarrhea<br>[2.36]     |
| Akita                    | Dermatitis<br>[1.31] | Neonatal<br>[1.23]      | Congenital<br>[0.89]    | Asthma<br>[0.9]        | Skin Viral<br>[0.98]   | Falls<br>[1.21]      | Conduct<br>[0.89]      | Diarrhea<br>[2.09]   | Anxiety<br>[0.81]    | Iron<br>[1.95]         |
| Aomori                   | Dermatitis<br>[1.31] | Neonatal<br>[1.15]      | Asthma<br>[0.89]        | Congenital<br>[0.66]   | Skin Viral<br>[0.98]   | Falls<br>[1.2]       | Conduct<br>[0.89]      | Diarrhea<br>[2.05]   | Anxiety<br>[0.81]    | Vit A<br>[1.9]         |
| Chiba                    | Dermatitis<br>[1.31] | Neonatal<br>[1.13]      | Asthma<br>[0.94]        | Congenital<br>[0.78]   | Skin Viral<br>[1.0]    | Falls<br>[1.15]      | Conduct<br>[0.9]       | Anxiety<br>[0.79]    | URI<br>[0.99]        | Diarrhea<br>[1.9]      |
| Ehime                    | Dermatitis<br>[1.31] | Neonatal<br>[0.94]      | Asthma<br>[0.9]         | Congenital<br>[0.74]   | Skin Viral<br>[0.98]   | Falls<br>[1.22]      | Conduct<br>[0.9]       | Anxiety<br>[0.8]     | Vit A<br>[1.94]      | Road Inj<br>[0.5]      |
| Fukui                    | Dermatitis<br>[1.31] | Neonatal<br>[1.12]      | Asthma<br>[0.91]        | Congenital<br>[0.72]   | Skin Viral<br>[0.99]   | Falls<br>[1.18]      | Conduct<br>[0.9]       | Diarrhea<br>[2.34]   | Anxiety<br>[0.79]    | Road Inj<br>[0.55]     |
| Fukuoka                  | Dermatitis<br>[1.31] | Neonatal<br>[1.12]      | Asthma<br>[0.93]        | Congenital<br>[0.74]   | Skin Viral<br>[1.0]    | Falls<br>[1.16]      | Conduct<br>[0.9]       | Anxiety<br>[0.79]    | Diarrhea<br>[1.96]   | Iron<br>[2.35]         |
| Fukushima                | Dermatitis<br>[1.31] | Neonatal<br>[1.06]      | Asthma<br>[0.89]        | Congenital<br>[0.72]   | Skin Viral<br>[0.98]   | Falls<br>[1.19]      | Diarrhea<br>[2.33]     | Conduct<br>[0.89]    | Anxiety<br>[0.8]     | URI<br>[1.01]          |
| Gifu                     | Dermatitis<br>[1.31] | Neonatal<br>[1.16]      | Asthma<br>[0.92]        | Congenital<br>[0.66]   | Skin Viral<br>[0.99]   | Falls<br>[1.18]      | Iron<br>[3.04]         | Conduct<br>[0.9]     | Diarrhea<br>[2.33]   | Anxiety<br>[0.79]      |
| Gunma                    | Dermatitis<br>[1.3]  | Neonatal<br>[1.1]       | Asthma<br>[0.92]        | Congenital<br>[0.72]   | Skin Viral<br>[0.99]   | Falls<br>[1.16]      | Conduct<br>[0.9]       | Diarrhea<br>[2.31]   | Anxiety<br>[0.79]    | Iron<br>[2.23]         |
| Hiroshima                | Dermatitis<br>[1.31] | Neonatal<br>[1.18]      | Asthma<br>[0.94]        | Skin Viral<br>[1.0]    | Congenital<br>[0.65]   | Falls<br>[1.12]      | Conduct<br>[0.91]      | Anxiety<br>[0.78]    | Diarrhea<br>[2.28]   | URI<br>[0.98]          |
| Hokkaido                 | Dermatitis<br>[1.31] | Neonatal<br>[1.1]       | Asthma<br>[0.91]        | Congenital<br>[0.71]   | Skin Viral<br>[0.98]   | Falls<br>[1.16]      | Diarrhea<br>[2.3]      | Conduct<br>[0.89]    | Anxiety<br>[0.8]     | Vit A<br>[2.18]        |
| Hyogo                    | Dermatitis<br>[1.31] | Neonatal<br>[1.15]      | Asthma<br>[0.79]        | Skin Viral<br>[1.0]    | Falls<br>[1.14]        | Congenital<br>[0.62] | Conduct<br>[0.9]       | Diarrhea<br>[2.36]   | Anxiety<br>[0.78]    | URI<br>[1.0]           |
| Ibaraki                  | Dermatitis<br>[1.31] | Neonatal<br>[1.19]      | Congenital<br>[0.8]     | Asthma<br>[0.92]       | Skin Viral<br>[0.99]   | Falls<br>[1.15]      | Conduct<br>[0.9]       | Anxiety<br>[0.79]    | Vit A<br>[2.37]      | Diarrhea<br>[1.99]     |

**eFigure 7d. Leading ten causes of DALYs with the ratio of observed DALYs to DALYs expected on the basis of Socio-Demographic Index alone in 2017, 5-9 years, both sexes combined.** The top ten causes contributing to DALYs are listed globally, by socio-demographic quintile, and then by GBD superregion, region, country, and subnationally where modeled. For each cell, the ratio of observed DALYs to DALYs expected on the basis of socio-demographic index (SDI) alone are listed. Abbreviations: DALY=disability-adjusted life year, GBD=Global Burden of Disease.

Values shown in brackets represent the ratio of observed DALYs to predicted DALYs on the basis of Socio-Demographic Index (SDI), rounded to two (2) digits. Color ranges (shown below) were calculated to place a roughly equal number of cells into each bin.

| COLOR KEY: |                      | [0.0-0.62]           | [0.62-0.79]          | [0.79-0.89]          | [0.89-0.97]          | [0.97-1.07]          | [1.07-1.26]        | [1.26-1.44]        | [1.44-2.32]        | 2.32+              |
|------------|----------------------|----------------------|----------------------|----------------------|----------------------|----------------------|--------------------|--------------------|--------------------|--------------------|
|            | 1                    | 2                    | 3                    | 4                    | 5                    | 6                    | 7                  | 8                  | 9                  | 10                 |
| Ishikawa   | Dermatitis<br>[1.31] | Neonatal<br>[1.1]    | Congenital<br>[0.81] | Asthma<br>[0.93]     | Skin Viral<br>[0.99] | Falls<br>[1.16]      | Conduct<br>[0.89]  | Diarrhea<br>[2.33] | Anxiety<br>[0.79]  | URI<br>[0.99]      |
| Iwate      | Dermatitis<br>[1.31] | Neonatal<br>[1.18]   | Congenital<br>[0.78] | Asthma<br>[0.89]     | Skin Viral<br>[0.97] | Falls<br>[1.21]      | Conduct<br>[0.89]  | Diarrhea<br>[2.04] | Anxiety<br>[0.81]  | Vit A<br>[1.62]    |
| Kagawa     | Dermatitis<br>[1.3]  | Neonatal<br>[1.08]   | Asthma<br>[0.92]     | Diarrhea<br>[3.03]   | Congenital<br>[0.69] | Skin Viral<br>[0.99] | Falls<br>[1.14]    | Conduct<br>[0.9]   | Anxiety<br>[0.79]  | URI<br>[1.0]       |
| Kagoshima  | Dermatitis<br>[1.31] | Neonatal<br>[0.98]   | Congenital<br>[0.77] | Asthma<br>[0.89]     | Skin Viral<br>[0.98] | Falls<br>[1.19]      | Conduct<br>[0.89]  | Diarrhea<br>[2.15] | Anxiety<br>[0.81]  | Iron<br>[2.0]      |
| Kanagawa   | Dermatitis<br>[1.31] | Neonatal<br>[1.19]   | Congenital<br>[0.87] | Asthma<br>[0.98]     | Skin Viral<br>[1.01] | Falls<br>[1.13]      | Conduct<br>[0.91]  | Anxiety<br>[0.78]  | ASD<br>[1.59]      | URI<br>[0.99]      |
| Kochi      | Dermatitis<br>[1.31] | Neonatal<br>[1.05]   | Asthma<br>[0.89]     | Congenital<br>[0.7]  | Skin Viral<br>[0.98] | Falls<br>[1.21]      | Conduct<br>[0.88]  | Diarrhea<br>[2.07] | Anxiety<br>[0.81]  | Iron<br>[1.79]     |
| Kumamoto   | Dermatitis<br>[1.31] | Neonatal<br>[1.03]   | Asthma<br>[0.89]     | Congenital<br>[0.64] | Skin Viral<br>[0.98] | Falls<br>[1.19]      | Conduct<br>[0.89]  | Anxiety<br>[0.81]  | Iron<br>[2.05]     | Diarrhea<br>[1.84] |
| Kyoto      | Neonatal<br>[1.19]   | Dermatitis<br>[1.04] | Congenital<br>[0.98] | Asthma<br>[0.97]     | Skin Viral<br>[1.01] | Falls<br>[1.13]      | Conduct<br>[0.92]  | Anxiety<br>[0.77]  | Diarrhea<br>[2.41] | URI<br>[0.98]      |
| Mie        | Dermatitis<br>[1.31] | Neonatal<br>[1.17]   | Asthma<br>[0.92]     | Skin Viral<br>[0.99] | Diarrhea<br>[2.72]   | Congenital<br>[0.65] | Falls<br>[1.14]    | Conduct<br>[0.9]   | Anxiety<br>[0.79]  | URI<br>[0.99]      |
| Miyagi     | Dermatitis<br>[1.31] | Neonatal<br>[1.09]   | Congenital<br>[0.84] | Asthma<br>[0.77]     | Skin Viral<br>[0.99] | Falls<br>[1.16]      | Conduct<br>[0.9]   | Anxiety<br>[0.79]  | Diarrhea<br>[2.09] | URI<br>[1.0]       |
| Miyazaki   | Dermatitis<br>[1.31] | Neonatal<br>[1.03]   | Asthma<br>[0.88]     | Congenital<br>[0.69] | Skin Viral<br>[0.98] | Falls<br>[1.21]      | Conduct<br>[0.89]  | Anxiety<br>[0.81]  | URI<br>[1.01]      | ASD<br>[1.34]      |
| Nagano     | Dermatitis<br>[1.31] | Neonatal<br>[1.19]   | Asthma<br>[0.92]     | Congenital<br>[0.72] | Diarrhea<br>[2.82]   | Skin Viral<br>[0.99] | Falls<br>[1.18]    | Conduct<br>[0.9]   | Anxiety<br>[0.79]  | URI<br>[1.0]       |
| Nagasaki   | Dermatitis<br>[1.31] | Neonatal<br>[1.03]   | Congenital<br>[0.73] | Asthma<br>[0.88]     | Skin Viral<br>[0.98] | Falls<br>[1.19]      | Conduct<br>[0.89]  | Anxiety<br>[0.81]  | Diarrhea<br>[1.69] | URI<br>[1.01]      |
| Nara       | Dermatitis<br>[1.31] | Neonatal<br>[1.02]   | Congenital<br>[0.87] | Asthma<br>[0.92]     | Skin Viral<br>[0.99] | Falls<br>[1.17]      | Conduct<br>[0.9]   | Anxiety<br>[0.8]   | Diarrhea<br>[2.24] | Vit A<br>[2.1]     |
| Niigata    | Dermatitis<br>[1.3]  | Neonatal<br>[1.15]   | Asthma<br>[0.91]     | Congenital<br>[0.74] | Skin Viral<br>[0.99] | Falls<br>[1.17]      | Iron<br>[2.9]      | Conduct<br>[0.89]  | Anxiety<br>[0.8]   | Diarrhea<br>[2.14] |
| Oita       | Dermatitis<br>[1.3]  | Neonatal<br>[1.2]    | Asthma<br>[0.9]      | Congenital<br>[0.74] | Skin Viral<br>[0.99] | Falls<br>[1.2]       | Diarrhea<br>[2.51] | Conduct<br>[0.9]   | Anxiety<br>[0.79]  | URI<br>[1.0]       |
| Okayama    | Dermatitis<br>[1.3]  | Neonatal<br>[1.21]   | Asthma<br>[0.93]     | Skin Viral<br>[0.99] | Congenital<br>[0.64] | Falls<br>[1.15]      | Conduct<br>[0.91]  | Anxiety<br>[0.79]  | Diarrhea<br>[2.08] | URI<br>[0.99]      |
| Okinawa    | Dermatitis<br>[1.31] | Neonatal<br>[1.08]   | Asthma<br>[0.75]     | Skin Viral<br>[0.98] | Falls<br>[1.21]      | Congenital<br>[0.56] | Vit A<br>[2.04]    | Conduct<br>[0.88]  | Anxiety<br>[0.81]  | Diarrhea<br>[1.76] |
| Osaka      | Dermatitis<br>[1.31] | Neonatal<br>[1.09]   | Asthma<br>[0.96]     | Congenital<br>[0.82] | Skin Viral<br>[1.01] | Falls<br>[1.15]      | Conduct<br>[0.91]  | Anxiety<br>[0.78]  | Diarrhea<br>[2.15] | URI<br>[0.99]      |
| Saga       | Dermatitis<br>[1.31] | Neonatal<br>[1.08]   | Asthma<br>[0.9]      | Congenital<br>[0.68] | Skin Viral<br>[0.98] | Falls<br>[1.19]      | Conduct<br>[0.89]  | Anxiety<br>[0.8]   | Diarrhea<br>[2.07] | URI<br>[1.0]       |
| Saitama    | Dermatitis<br>[1.31] | Neonatal<br>[1.12]   | Asthma<br>[0.93]     | Congenital<br>[0.68] | Skin Viral<br>[0.99] | Falls<br>[1.18]      | Conduct<br>[0.9]   | Anxiety<br>[0.79]  | Diarrhea<br>[2.07] | URI<br>[1.0]       |
| Shiga      | Dermatitis<br>[1.59] | Neonatal<br>[1.08]   | Asthma<br>[0.95]     | Congenital<br>[0.76] | Skin Viral<br>[1.0]  | Falls<br>[1.13]      | Conduct<br>[0.91]  | Anxiety<br>[0.78]  | Diarrhea<br>[2.4]  | URI<br>[0.99]      |
| Shimane    | Dermatitis<br>[1.31] | Neonatal<br>[1.06]   | Asthma<br>[0.88]     | Congenital<br>[0.63] | Skin Viral<br>[0.98] | Falls<br>[1.2]       | Conduct<br>[0.9]   | Diarrhea<br>[2.1]  | Anxiety<br>[0.8]   | URI<br>[1.01]      |
| Shizuoka   | Dermatitis<br>[1.31] | Neonatal<br>[1.25]   | Asthma<br>[0.93]     | Congenital<br>[0.7]  | Skin Viral<br>[1.0]  | Falls<br>[1.13]      | Conduct<br>[0.91]  | Anxiety<br>[0.79]  | Diarrhea<br>[2.14] | Vit A<br>[2.24]    |
| Tochigi    | Dermatitis<br>[1.31] | Neonatal<br>[1.2]    | Congenital<br>[0.94] | Asthma<br>[0.93]     | Skin Viral<br>[0.99] | Falls<br>[1.13]      | Conduct<br>[0.9]   | Anxiety<br>[0.79]  | URI<br>[0.99]      | ASD<br>[1.33]      |
| Tokushima  | Dermatitis<br>[1.3]  | Neonatal<br>[1.14]   | Congenital<br>[0.84] | Asthma<br>[0.91]     | Skin Viral<br>[0.99] | Falls<br>[1.21]      | Diarrhea<br>[2.51] | Road Inj<br>[0.66] | Conduct<br>[0.9]   | Anxiety<br>[0.79]  |
| Tokyo      | Dermatitis<br>[1.33] | Neonatal<br>[1.25]   | Congenital<br>[1.07] | Asthma<br>[1.07]     | Skin Viral<br>[1.05] | Falls<br>[1.05]      | Conduct<br>[0.95]  | Anxiety<br>[0.76]  | Diarrhea<br>[2.52] | URI<br>[0.97]      |
| Tottori    | Dermatitis<br>[1.3]  | Neonatal<br>[1.14]   | Congenital<br>[0.82] | Asthma<br>[0.89]     | Skin Viral<br>[0.98] | Falls<br>[1.2]       | Conduct<br>[0.9]   | Anxiety<br>[0.8]   | Iron<br>[2.27]     | Road Inj<br>[0.52] |
| Toyama     | Dermatitis<br>[1.3]  | Neonatal<br>[1.1]    | Asthma<br>[0.94]     | Congenital<br>[0.74] | Skin Viral<br>[1.0]  | Falls<br>[1.13]      | Conduct<br>[0.91]  | Diarrhea<br>[2.43] | Iron<br>[3.01]     | Anxiety<br>[0.78]  |
| Wakayama   | Dermatitis<br>[1.31] | Neonatal<br>[1.19]   | Asthma<br>[0.9]      | Skin Viral<br>[0.98] | Congenital<br>[0.62] | Falls<br>[1.18]      | Conduct<br>[0.9]   | Iron<br>[2.56]     | Anxiety<br>[0.8]   | Diarrhea<br>[2.11] |
| Yamagata   | Dermatitis<br>[1.31] | Neonatal<br>[0.97]   | Asthma<br>[0.9]      | Congenital<br>[0.69] | Skin Viral<br>[0.98] | Diarrhea<br>[2.44]   | Falls<br>[1.21]    | Conduct<br>[0.89]  | Anxiety<br>[0.8]   | URI<br>[1.01]      |

**eFigure 7d. Leading ten causes of DALYs with the ratio of observed DALYs to DALYs expected on the basis of Socio-Demographic Index alone in 2017, 5-9 years, both sexes combined.** The top ten causes contributing to DALYs are listed globally, by socio-demographic quintile, and then by GBD superregion, region, country, and subnationally where modeled. For each cell, the ratio of observed DALYs to DALYs expected on the basis of socio-demographic index (SDI) alone are listed. Abbreviations: DALY=disability-adjusted life year, GBD=Global Burden of Disease.

Values shown in brackets represent the ratio of observed DALYs to predicted DALYs on the basis of Socio-Demographic Index (SDI), rounded to two (2) digits. Color ranges (shown below) were calculated to place a roughly equal number of cells into each bin.

| COLOR KEY:                |                      | [0.0-0.62]           | [0.62-0.79]          | [0.79-0.89]          | [0.89-0.97]          | [0.97-1.07]          | [1.07-1.26]          | [1.26-1.44]          | [1.44-2.32]          | 2.32+               |
|---------------------------|----------------------|----------------------|----------------------|----------------------|----------------------|----------------------|----------------------|----------------------|----------------------|---------------------|
|                           | 1                    | 2                    | 3                    | 4                    | 5                    | 6                    | 7                    | 8                    | 9                    | 10                  |
| Yamaguchi                 | Dermatitis<br>[1.31] | Neonatal<br>[1.01]   | Asthma<br>[0.91]     | Skin Viral<br>[0.99] | Congenital<br>[0.61] | Falls<br>[1.13]      | Conduct<br>[0.9]     | Diarrhea<br>[2.33]   | Anxiety<br>[0.79]    | URI<br>[1.0]        |
| Yamanashi                 | Dermatitis<br>[1.31] | Neonatal<br>[1.26]   | Asthma<br>[0.93]     | Congenital<br>[0.74] | Skin Viral<br>[1.0]  | Falls<br>[1.16]      | Conduct<br>[0.9]     | Anxiety<br>[0.79]    | Diarrhea<br>[2.13]   | URI<br>[0.99]       |
| S Korea                   | Neonatal<br>[1.18]   | Dermatitis<br>[1.11] | Asthma<br>[0.89]     | Skin Viral<br>[1.01] | Anxiety<br>[0.85]    | Diarrhea<br>[2.57]   | Falls<br>[1.04]      | Congenital<br>[0.57] | Road Inj<br>[0.7]    | Conduct<br>[0.82]   |
| Singapore                 | Neonatal<br>[1.17]   | Dermatitis<br>[1.03] | Asthma<br>[0.88]     | Skin Viral<br>[1.01] | Anxiety<br>[0.83]    | Falls<br>[1.04]      | Diarrhea<br>[2.4]    | Conduct<br>[0.85]    | Congenital<br>[0.56] | Iron<br>[2.96]      |
| High-income North America | Dermatitis<br>[1.28] | Asthma<br>[1.44]     | Neonatal<br>[0.88]   | Skin Viral<br>[1.16] | Conduct<br>[1.18]    | Congenital<br>[0.77] | Anxiety<br>[0.92]    | Road Inj<br>[0.81]   | Psoriasis<br>[3.75]  | URI<br>[0.98]       |
| Canada                    | Dermatitis<br>[1.38] | Asthma<br>[1.58]     | Skin Viral<br>[1.28] | Neonatal<br>[0.61]   | Congenital<br>[0.68] | Conduct<br>[0.97]    | Anxiety<br>[0.77]    | Psoriasis<br>[3.73]  | ASD<br>[1.51]        | URI<br>[1.03]       |
| Greenland                 | Dermatitis<br>[1.33] | Asthma<br>[1.43]     | Drown<br>[1.61]      | Congenital<br>[0.7]  | Fire<br>[3.81]       | Neonatal<br>[0.6]    | Skin Viral<br>[1.18] | Conduct<br>[1.0]     | Violence<br>[3.0]    | Anxiety<br>[0.96]   |
| USA                       | Dermatitis<br>[1.27] | Asthma<br>[1.42]     | Neonatal<br>[0.9]    | Conduct<br>[1.19]    | Skin Viral<br>[1.15] | Congenital<br>[0.76] | Anxiety<br>[0.94]    | Road Inj<br>[0.81]   | Psoriasis<br>[3.76]  | URI<br>[0.98]       |
| Alabama                   | Dermatitis<br>[1.12] | Asthma<br>[1.39]     | Neonatal<br>[0.89]   | Road Inj<br>[1.22]   | Skin Viral<br>[1.2]  | Conduct<br>[1.14]    | Congenital<br>[0.67] | Anxiety<br>[0.96]    | Iron<br>[2.52]       | Psoriasis<br>[3.43] |
| Alaska                    | Dermatitis<br>[1.12] | Neonatal<br>[0.85]   | Asthma<br>[1.08]     | Congenital<br>[0.82] | Conduct<br>[1.16]    | Anxiety<br>[0.94]    | Road Inj<br>[0.72]   | Drown<br>[1.96]      | Skin Viral<br>[0.83] | Oth Trans<br>[6.44] |
| Arizona                   | Dermatitis<br>[1.3]  | Asthma<br>[1.5]      | Neonatal<br>[0.89]   | Conduct<br>[1.15]    | Congenital<br>[0.7]  | Road Inj<br>[0.79]   | Anxiety<br>[0.95]    | Skin Viral<br>[0.89] | Iron<br>[2.81]       | Psoriasis<br>[3.42] |
| Arkansas                  | Dermatitis<br>[1.03] | Road Inj<br>[1.16]   | Neonatal<br>[0.78]   | Asthma<br>[1.05]     | Congenital<br>[0.68] | Conduct<br>[1.14]    | Anxiety<br>[0.97]    | Skin Viral<br>[0.97] | Iron<br>[1.99]       | URI<br>[0.99]       |
| California                | Dermatitis<br>[1.42] | Asthma<br>[1.36]     | Neonatal<br>[0.75]   | Conduct<br>[1.18]    | Congenital<br>[0.71] | Anxiety<br>[0.93]    | Skin Viral<br>[0.97] | Psoriasis<br>[3.89]  | Road Inj<br>[0.6]    | ASD<br>[1.39]       |
| Colorado                  | Dermatitis<br>[1.14] | Neonatal<br>[0.92]   | Asthma<br>[1.37]     | Conduct<br>[1.18]    | Congenital<br>[0.74] | Anxiety<br>[0.93]    | Skin Viral<br>[0.98] | Road Inj<br>[0.75]   | URI<br>[0.97]        | Psoriasis<br>[2.68] |
| Connecticut               | Dermatitis<br>[1.44] | Asthma<br>[1.94]     | Neonatal<br>[1.08]   | Skin Viral<br>[1.53] | Conduct<br>[1.19]    | Anxiety<br>[0.91]    | Congenital<br>[0.74] | Psoriasis<br>[4.13]  | URI<br>[0.97]        | Epilepsy<br>[1.37]  |
| Delaware                  | Dermatitis<br>[1.14] | Asthma<br>[1.58]     | Neonatal<br>[0.88]   | Skin Viral<br>[1.36] | Conduct<br>[1.17]    | Congenital<br>[0.73] | Anxiety<br>[0.93]    | Road Inj<br>[0.79]   | Psoriasis<br>[4.09]  | Epilepsy<br>[1.38]  |
| DC                        | Dermatitis<br>[1.69] | Asthma<br>[1.6]      | Neonatal<br>[0.93]   | Violence<br>[7.8]    | Skin Viral<br>[1.36] | Congenital<br>[0.94] | Conduct<br>[1.17]    | Anxiety<br>[0.93]    | Road Inj<br>[0.86]   | Psoriasis<br>[3.68] |
| Florida                   | Dermatitis<br>[1.28] | Neonatal<br>[1.01]   | Asthma<br>[1.55]     | Skin Viral<br>[1.35] | Conduct<br>[1.16]    | Congenital<br>[0.76] | Road Inj<br>[0.86]   | Anxiety<br>[0.94]    | Psoriasis<br>[4.71]  | Iron<br>[2.76]      |
| Georgia                   | Dermatitis<br>[1.39] | Asthma<br>[1.49]     | Neonatal<br>[0.83]   | Road Inj<br>[0.98]   | Skin Viral<br>[1.19] | Conduct<br>[1.15]    | Congenital<br>[0.7]  | Anxiety<br>[0.95]    | Psoriasis<br>[4.18]  | Epilepsy<br>[1.24]  |
| Hawaii                    | Dermatitis<br>[1.49] | Asthma<br>[1.55]     | Neonatal<br>[0.82]   | Skin Viral<br>[1.37] | Conduct<br>[1.17]    | Congenital<br>[0.74] | Anxiety<br>[0.94]    | Road Inj<br>[0.71]   | Psoriasis<br>[3.86]  | URI<br>[0.98]       |
| Idaho                     | Dermatitis<br>[1.04] | Neonatal<br>[0.74]   | Skin Viral<br>[1.26] | Road Inj<br>[0.81]   | Conduct<br>[1.15]    | Congenital<br>[0.66] | Asthma<br>[0.78]     | Anxiety<br>[0.96]    | URI<br>[0.99]        | Psoriasis<br>[2.82] |
| Illinois                  | Dermatitis<br>[1.12] | Neonatal<br>[1.06]   | Asthma<br>[1.33]     | Congenital<br>[0.82] | Skin Viral<br>[1.16] | Conduct<br>[1.17]    | Anxiety<br>[0.93]    | Road Inj<br>[0.68]   | Psoriasis<br>[3.57]  | URI<br>[0.97]       |
| Indiana                   | Dermatitis<br>[1.09] | Asthma<br>[1.33]     | Neonatal<br>[0.85]   | Congenital<br>[0.81] | Iron<br>[3.79]       | Conduct<br>[1.15]    | Road Inj<br>[0.8]    | Anxiety<br>[0.95]    | Skin Viral<br>[1.0]  | Epilepsy<br>[1.23]  |
| Iowa                      | Dermatitis<br>[1.0]  | Neonatal<br>[0.87]   | Skin Viral<br>[1.17] | Conduct<br>[1.17]    | Congenital<br>[0.76] | Asthma<br>[0.83]     | Road Inj<br>[0.89]   | Anxiety<br>[0.94]    | Iron<br>[3.53]       | URI<br>[0.97]       |
| Kansas                    | Dermatitis<br>[1.06] | Neonatal<br>[0.92]   | Asthma<br>[1.38]     | Road Inj<br>[1.11]   | Conduct<br>[1.16]    | Congenital<br>[0.77] | Skin Viral<br>[1.05] | Anxiety<br>[0.94]    | URI<br>[0.97]        | Psoriasis<br>[3.14] |
| Kentucky                  | Dermatitis<br>[1.12] | Asthma<br>[1.37]     | Neonatal<br>[0.87]   | Road Inj<br>[0.93]   | Skin Viral<br>[1.21] | Congenital<br>[0.74] | Conduct<br>[1.14]    | Anxiety<br>[0.97]    | Iron<br>[2.03]       | Epilepsy<br>[1.22]  |
| Louisiana                 | Dermatitis<br>[1.2]  | Neonatal<br>[0.81]   | Skin Viral<br>[1.59] | Asthma<br>[1.1]      | Road Inj<br>[1.0]    | Congenital<br>[0.76] | Conduct<br>[1.14]    | Anxiety<br>[0.97]    | Psoriasis<br>[4.06]  | Epilepsy<br>[1.25]  |
| Maine                     | Dermatitis<br>[0.97] | Asthma<br>[1.52]     | Neonatal<br>[0.91]   | Congenital<br>[0.8]  | Conduct<br>[1.17]    | Road Inj<br>[0.9]    | Skin Viral<br>[1.05] | Anxiety<br>[0.94]    | Psoriasis<br>[3.46]  | URI<br>[0.99]       |
| Maryland                  | Dermatitis<br>[1.44] | Neonatal<br>[1.06]   | Asthma<br>[1.65]     | Skin Viral<br>[1.18] | Conduct<br>[1.19]    | Congenital<br>[0.84] | Anxiety<br>[0.92]    | Road Inj<br>[0.88]   | Psoriasis<br>[4.11]  | URI<br>[0.96]       |
| Massachusetts             | Dermatitis<br>[1.29] | Neonatal<br>[1.03]   | Asthma<br>[1.69]     | Skin Viral<br>[1.42] | Conduct<br>[1.2]     | Congenital<br>[0.87] | Anxiety<br>[0.91]    | Psoriasis<br>[4.13]  | ASD<br>[1.5]         | URI<br>[0.97]       |
| Michigan                  | Dermatitis<br>[1.13] | Asthma<br>[1.53]     | Neonatal<br>[0.89]   | Skin Viral<br>[1.36] | Congenital<br>[0.83] | Conduct<br>[1.16]    | Anxiety<br>[0.94]    | Road Inj<br>[0.76]   | Iron<br>[3.26]       | Psoriasis<br>[3.59] |

**eFigure 7d. Leading ten causes of DALYs with the ratio of observed DALYs to DALYs expected on the basis of Socio-Demographic Index alone in 2017, 5-9 years, both sexes combined.** The top ten causes contributing to DALYs are listed globally, by socio-demographic quintile, and then by GBD superregion, region, country, and subnationally where modeled. For each cell, the ratio of observed DALYs to DALYs expected on the basis of socio-demographic index (SDI) alone are listed. Abbreviations: DALY=disability-adjusted life year, GBD=Global Burden of Disease.

Values shown in brackets represent the ratio of observed DALYs to predicted DALYs on the basis of Socio-Demographic Index (SDI), rounded to two (2) digits. Color ranges (shown below) were calculated to place a roughly equal number of cells into each bin.

| COLOR KEY:             |                      | [0.0-0.62]           | [0.62-0.79]         | [0.79-0.89]          | [0.89-0.97]          | [0.97-1.07]          | [1.07-1.26]          | [1.26-1.44]          | [1.44-2.32]          | 2.32+               |
|------------------------|----------------------|----------------------|---------------------|----------------------|----------------------|----------------------|----------------------|----------------------|----------------------|---------------------|
|                        | 1                    | 2                    | 3                   | 4                    | 5                    | 6                    | 7                    | 8                    | 9                    | 10                  |
| Minnesota              | Dermatitis<br>[1.0]  | Neonatal<br>[0.96]   | Asthma<br>[1.19]    | Skin Viral<br>[1.34] | Congenital<br>[0.89] | Conduct<br>[1.19]    | Anxiety<br>[0.93]    | Road Inj<br>[0.88]   | URI<br>[0.97]        | ASD<br>[1.34]       |
| Mississippi            | Dermatitis<br>[1.02] | Road Inj<br>[1.19]   | Neonatal<br>[0.85]  | Asthma<br>[0.95]     | Conduct<br>[1.13]    | Iron<br>[2.62]       | Congenital<br>[0.63] | Anxiety<br>[0.98]    | Skin Viral<br>[0.97] | URI<br>[0.99]       |
| Missouri               | Dermatitis<br>[1.01] | Neonatal<br>[0.92]   | Asthma<br>[1.33]    | Road Inj<br>[0.96]   | Congenital<br>[0.8]  | Conduct<br>[1.16]    | Skin Viral<br>[1.04] | Anxiety<br>[0.95]    | URI<br>[0.98]        | Psoriasis<br>[3.22] |
| Montana                | Dermatitis<br>[0.99] | Neonatal<br>[0.87]   | Road Inj<br>[1.23]  | Asthma<br>[1.02]     | Skin Viral<br>[1.19] | Conduct<br>[1.16]    | Congenital<br>[0.77] | Anxiety<br>[0.94]    | Iron<br>[2.55]       | URI<br>[0.98]       |
| Nebraska               | Dermatitis<br>[1.0]  | Neonatal<br>[0.87]   | Asthma<br>[0.96]    | Skin Viral<br>[1.18] | Congenital<br>[0.82] | Road Inj<br>[1.0]    | Conduct<br>[1.17]    | Anxiety<br>[0.94]    | URI<br>[0.97]        | Psoriasis<br>[3.01] |
| Nevada                 | Dermatitis<br>[1.23] | Neonatal<br>[0.84]   | Asthma<br>[1.22]    | Conduct<br>[1.15]    | Anxiety<br>[0.96]    | Road Inj<br>[0.74]   | Congenital<br>[0.63] | Skin Viral<br>[0.71] | URI<br>[0.99]        | Psoriasis<br>[2.99] |
| New Hampshire          | Dermatitis<br>[1.01] | Asthma<br>[1.46]     | Neonatal<br>[0.87]  | Skin Viral<br>[1.2]  | Conduct<br>[1.19]    | Congenital<br>[0.82] | Anxiety<br>[0.92]    | Psoriasis<br>[3.83]  | Road Inj<br>[0.82]   | URI<br>[0.97]       |
| New Jersey             | Dermatitis<br>[1.57] | Asthma<br>[1.95]     | Neonatal<br>[0.97]  | Skin Viral<br>[1.4]  | Congenital<br>[0.88] | Conduct<br>[1.19]    | Anxiety<br>[0.92]    | Psoriasis<br>[4.59]  | ASD<br>[1.65]        | URI<br>[0.96]       |
| New Mexico             | Dermatitis<br>[1.13] | Asthma<br>[1.48]     | Neonatal<br>[0.95]  | Road Inj<br>[0.99]   | Congenital<br>[0.73] | Conduct<br>[1.14]    | Anxiety<br>[0.97]    | Skin Viral<br>[0.72] | URI<br>[0.99]        | Epilepsy<br>[1.06]  |
| New York               | Dermatitis<br>[1.62] | Asthma<br>[2.11]     | Neonatal<br>[1.01]  | Skin Viral<br>[1.45] | Congenital<br>[0.91] | Conduct<br>[1.18]    | Psoriasis<br>[5.0]   | Anxiety<br>[0.92]    | URI<br>[0.96]        | Epilepsy<br>[1.39]  |
| N Carolina             | Dermatitis<br>[1.18] | Neonatal<br>[0.9]    | Asthma<br>[1.28]    | Skin Viral<br>[1.16] | Road Inj<br>[0.87]   | Congenital<br>[0.72] | Conduct<br>[1.06]    | Anxiety<br>[0.9]     | Psoriasis<br>[3.76]  | URI<br>[0.98]       |
| N Dakota               | Dermatitis<br>[0.96] | Neonatal<br>[0.95]   | Asthma<br>[1.16]    | Congenital<br>[0.89] | Skin Viral<br>[1.14] | Conduct<br>[1.18]    | Anxiety<br>[0.93]    | Road Inj<br>[0.85]   | URI<br>[0.97]        | Iron<br>[2.63]      |
| Ohio                   | Dermatitis<br>[1.2]  | Asthma<br>[1.41]     | Neonatal<br>[0.86]  | Congenital<br>[0.84] | Conduct<br>[1.16]    | Skin Viral<br>[1.12] | Anxiety<br>[0.94]    | Road Inj<br>[0.68]   | Psoriasis<br>[3.44]  | Epilepsy<br>[1.31]  |
| Oklahoma               | Dermatitis<br>[1.25] | Asthma<br>[1.5]      | Road Inj<br>[1.26]  | Neonatal<br>[0.81]   | Congenital<br>[0.82] | Conduct<br>[1.15]    | Anxiety<br>[0.96]    | Skin Viral<br>[0.94] | Epilepsy<br>[1.22]   | URI<br>[0.98]       |
| Oregon                 | Dermatitis<br>[1.32] | Neonatal<br>[0.78]   | Asthma<br>[1.08]    | Skin Viral<br>[1.16] | Congenital<br>[0.7]  | Conduct<br>[1.02]    | Anxiety<br>[0.87]    | Psoriasis<br>[3.64]  | Road Inj<br>[0.63]   | URI<br>[0.97]       |
| Pennsylvania           | Dermatitis<br>[1.24] | Asthma<br>[1.59]     | Neonatal<br>[0.9]   | Congenital<br>[0.86] | Skin Viral<br>[1.2]  | Conduct<br>[1.17]    | Anxiety<br>[0.93]    | Road Inj<br>[0.75]   | Psoriasis<br>[3.7]   | URI<br>[0.97]       |
| Rhode Island           | Dermatitis<br>[1.14] | Asthma<br>[1.57]     | Neonatal<br>[0.88]  | Skin Viral<br>[1.43] | Conduct<br>[1.18]    | Anxiety<br>[0.92]    | Congenital<br>[0.74] | Psoriasis<br>[3.87]  | URI<br>[0.98]        | Epilepsy<br>[1.29]  |
| S Carolina             | Dermatitis<br>[1.37] | Neonatal<br>[0.85]   | Asthma<br>[1.28]    | Iron<br>[4.38]       | Road Inj<br>[0.99]   | Skin Viral<br>[1.19] | Congenital<br>[0.72] | Conduct<br>[1.14]    | Anxiety<br>[0.96]    | Psoriasis<br>[3.97] |
| S Dakota               | Dermatitis<br>[0.97] | Road Inj<br>[1.5]    | Neonatal<br>[0.77]  | Congenital<br>[0.9]  | Skin Viral<br>[1.29] | Asthma<br>[0.89]     | Conduct<br>[1.16]    | Anxiety<br>[0.95]    | Iron<br>[2.43]       | URI<br>[0.98]       |
| Tennessee              | Dermatitis<br>[1.12] | Neonatal<br>[0.84]   | Asthma<br>[1.08]    | Road Inj<br>[0.89]   | Conduct<br>[1.14]    | Congenital<br>[0.68] | Skin Viral<br>[1.01] | Anxiety<br>[0.96]    | ASD<br>[1.49]        | Psoriasis<br>[3.39] |
| Texas                  | Dermatitis<br>[1.33] | Neonatal<br>[0.96]   | Asthma<br>[1.48]    | Conduct<br>[1.49]    | Road Inj<br>[0.86]   | Congenital<br>[0.69] | Anxiety<br>[0.96]    | Skin Viral<br>[1.0]  | Psoriasis<br>[3.97]  | ASD<br>[1.6]        |
| Utah                   | Dermatitis<br>[1.06] | Neonatal<br>[0.83]   | Skin Viral<br>[1.3] | Conduct<br>[1.15]    | Asthma<br>[0.85]     | Congenital<br>[0.7]  | Anxiety<br>[0.95]    | ASD<br>[1.9]         | Iron<br>[3.2]        | Road Inj<br>[0.63]  |
| Vermont                | Dermatitis<br>[0.99] | Neonatal<br>[0.97]   | Asthma<br>[1.31]    | Conduct<br>[1.19]    | Congenital<br>[0.82] | Anxiety<br>[0.92]    | Skin Viral<br>[1.04] | Road Inj<br>[0.87]   | Psoriasis<br>[3.31]  | URI<br>[0.96]       |
| Virginia               | Dermatitis<br>[1.45] | Neonatal<br>[0.98]   | Asthma<br>[1.49]    | Conduct<br>[1.18]    | Skin Viral<br>[1.06] | Congenital<br>[0.74] | Anxiety<br>[0.93]    | Road Inj<br>[0.78]   | Psoriasis<br>[3.75]  | URI<br>[0.97]       |
| Washington             | Dermatitis<br>[1.28] | Neonatal<br>[0.83]   | Asthma<br>[1.06]    | Skin Viral<br>[1.22] | Conduct<br>[1.18]    | Congenital<br>[0.78] | Anxiety<br>[0.93]    | Psoriasis<br>[3.56]  | Road Inj<br>[0.63]   | URI<br>[0.97]       |
| W Virginia             | Dermatitis<br>[1.14] | Asthma<br>[1.42]     | Neonatal<br>[0.85]  | Road Inj<br>[0.96]   | Congenital<br>[0.74] | Conduct<br>[1.14]    | Anxiety<br>[0.97]    | Skin Viral<br>[0.97] | Iron<br>[2.25]       | Epilepsy<br>[1.25]  |
| Wisconsin              | Dermatitis<br>[1.0]  | Neonatal<br>[0.96]   | Asthma<br>[1.07]    | Skin Viral<br>[1.2]  | Congenital<br>[0.82] | Conduct<br>[1.18]    | Anxiety<br>[0.93]    | Road Inj<br>[0.73]   | URI<br>[0.97]        | Psoriasis<br>[3.2]  |
| Wyoming                | Dermatitis<br>[1.05] | Road Inj<br>[1.41]   | Neonatal<br>[0.73]  | Asthma<br>[1.09]     | Congenital<br>[0.8]  | Conduct<br>[1.17]    | Anxiety<br>[0.94]    | Skin Viral<br>[0.91] | URI<br>[0.98]        | Epilepsy<br>[1.16]  |
| Southern Latin America | Neonatal<br>[0.95]   | Dermatitis<br>[1.0]  | Asthma<br>[0.94]    | Anxiety<br>[1.37]    | Congenital<br>[0.57] | Road Inj<br>[0.42]   | Diarrhea<br>[1.77]   | Skin Viral<br>[0.99] | Conduct<br>[0.92]    | Leukemia<br>[0.58]  |
| Argentina              | Neonatal<br>[0.94]   | Dermatitis<br>[0.94] | Asthma<br>[0.92]    | Congenital<br>[0.56] | Anxiety<br>[1.38]    | Road Inj<br>[0.41]   | Diarrhea<br>[1.72]   | Skin Viral<br>[0.99] | Conduct<br>[0.93]    | Leukemia<br>[0.59]  |
| Chile                  | Dermatitis<br>[1.19] | Neonatal<br>[1.0]    | Asthma<br>[0.99]    | Anxiety<br>[1.32]    | Congenital<br>[0.59] | Diarrhea<br>[2.07]   | Road Inj<br>[0.46]   | Skin Viral<br>[0.99] | Conduct<br>[0.89]    | Epilepsy<br>[0.97]  |

Values shown in brackets represent the ratio of observed DALYs to predicted DALYs on the basis of Socio-Demographic Index (SDI), rounded to two (2) digits. Color ranges (shown below) were calculated to place a roughly equal number of cells into each bin.

**eFigure 7d. Leading ten causes of DALYs with the ratio of observed DALYs to DALYs expected on the basis of Socio-Demographic Index alone in 2017, 5-9 years, both sexes combined.** The top ten causes contributing to DALYs are listed globally, by socio-demographic quintile, and then by GBD superregion, region, country, and subnationally where modeled. For each cell, the ratio of observed DALYs to DALYs expected on the basis of socio-demographic index (SDI) alone are listed. Abbreviations: DALY=disability-adjusted life year, GBD=Global Burden of Disease.

Values shown in brackets represent the ratio of observed DALYs to predicted DALYs on the basis of Socio-Demographic Index (SDI), rounded to two (2) digits. Color ranges (shown below) were calculated to place a roughly equal number of cells into each bin.

| COLOR KEY:           |                      | [0.0-0.62]         | [0.62-0.79]        | [0.79-0.89]          | [0.89-0.97]          | [0.97-1.07]          | [1.07-1.26]          | [1.26-1.44]          | [1.44-2.32]     | 2.32+           |
|----------------------|----------------------|--------------------|--------------------|----------------------|----------------------|----------------------|----------------------|----------------------|-----------------|-----------------|
|                      | 1                    | 2                  | 3                  | 4                    | 5                    | 6                    | 7                    | 8                    | 9               | 10              |
| Leicestershire       | Dermatitis<br>[1.44] | Asthma<br>[1.32]   | Neonatal<br>[0.79] | Iron<br>[4.19]       | Congenital<br>[0.79] | Anxiety<br>[1.05]    | Conduct<br>[0.98]    | Skin Viral<br>[0.88] | URI<br>[1.28]   | Falls<br>[0.87] |
| Lincolnshire         | Dermatitis<br>[1.44] | Neonatal<br>[0.92] | Asthma<br>[1.28]   | Congenital<br>[0.82] | Iron<br>[2.98]       | Anxiety<br>[1.09]    | Conduct<br>[0.96]    | Skin Viral<br>[0.87] | URI<br>[1.32]   | Falls<br>[0.93] |
| Northamptonshire     | Dermatitis<br>[1.44] | Neonatal<br>[1.03] | Asthma<br>[1.3]    | Iron<br>[3.52]       | Congenital<br>[0.76] | Anxiety<br>[1.07]    | Conduct<br>[0.97]    | Skin Viral<br>[0.87] | URI<br>[1.29]   | Falls<br>[0.89] |
| Nottingham           | Dermatitis<br>[1.44] | Neonatal<br>[1.15] | Asthma<br>[1.41]   | Congenital<br>[0.84] | Anxiety<br>[1.03]    | Iron<br>[3.96]       | Conduct<br>[1.0]     | Skin Viral<br>[0.89] | URI<br>[1.26]   | Falls<br>[0.84] |
| Nottinghamshire      | Dermatitis<br>[1.44] | Neonatal<br>[1.03] | Asthma<br>[1.27]   | Congenital<br>[0.69] | Anxiety<br>[1.08]    | Iron<br>[2.48]       | Conduct<br>[0.97]    | Skin Viral<br>[0.87] | URI<br>[1.31]   | Falls<br>[0.9]  |
| Rutland              | Dermatitis<br>[1.44] | Asthma<br>[1.29]   | Iron<br>[3.92]     | Neonatal<br>[0.66]   | Congenital<br>[0.72] | Anxiety<br>[1.07]    | Conduct<br>[0.97]    | Skin Viral<br>[0.88] | URI<br>[1.3]    | Falls<br>[0.87] |
| E England            | Dermatitis<br>[1.44] | Neonatal<br>[0.9]  | Asthma<br>[1.33]   | Congenital<br>[0.76] | Anxiety<br>[1.06]    | Iron<br>[2.97]       | Conduct<br>[0.98]    | Skin Viral<br>[0.88] | URI<br>[1.29]   | Falls<br>[0.88] |
| Bedford              | Dermatitis<br>[1.44] | Neonatal<br>[1.1]  | Asthma<br>[1.32]   | Congenital<br>[0.76] | Iron<br>[3.44]       | Anxiety<br>[1.06]    | Conduct<br>[0.98]    | Skin Viral<br>[0.88] | URI<br>[1.27]   | Falls<br>[0.87] |
| Cambridgeshire       | Dermatitis<br>[1.43] | Neonatal<br>[0.92] | Asthma<br>[1.41]   | Congenital<br>[0.88] | Anxiety<br>[1.03]    | Conduct<br>[1.0]     | Skin Viral<br>[0.89] | URI<br>[1.27]        | ASD<br>[1.65]   | Iron<br>[2.92]  |
| Cen Bedfordshire     | Dermatitis<br>[1.44] | Neonatal<br>[0.98] | Asthma<br>[1.3]    | Congenital<br>[0.7]  | Anxiety<br>[1.07]    | Conduct<br>[0.97]    | Skin Viral<br>[0.88] | Iron<br>[2.51]       | URI<br>[1.3]    | Falls<br>[0.88] |
| Essex                | Dermatitis<br>[1.44] | Neonatal<br>[0.89] | Asthma<br>[1.29]   | Congenital<br>[0.7]  | Anxiety<br>[1.08]    | Conduct<br>[0.97]    | Skin Viral<br>[0.88] | URI<br>[1.3]         | Iron<br>[2.3]   | Falls<br>[0.88] |
| Hertfordshire        | Dermatitis<br>[1.43] | Neonatal<br>[0.89] | Asthma<br>[1.39]   | Congenital<br>[0.78] | Anxiety<br>[1.03]    | Conduct<br>[1.0]     | Iron<br>[3.54]       | Skin Viral<br>[0.89] | URI<br>[1.27]   | Falls<br>[0.83] |
| Luton                | Dermatitis<br>[1.43] | Neonatal<br>[1.02] | Asthma<br>[1.37]   | Congenital<br>[0.9]  | Anxiety<br>[1.06]    | Conduct<br>[0.99]    | Skin Viral<br>[0.87] | URI<br>[1.28]        | Iron<br>[2.29]  | Falls<br>[0.93] |
| Norfolk              | Dermatitis<br>[1.44] | Asthma<br>[1.3]    | Neonatal<br>[0.76] | Congenital<br>[0.74] | Iron<br>[2.99]       | Anxiety<br>[1.07]    | Conduct<br>[0.98]    | Skin Viral<br>[0.87] | URI<br>[1.3]    | Falls<br>[0.91] |
| Peterborough         | Dermatitis<br>[1.44] | Asthma<br>[1.35]   | Neonatal<br>[0.71] | Congenital<br>[0.81] | Iron<br>[2.94]       | Anxiety<br>[1.07]    | Conduct<br>[0.98]    | Skin Viral<br>[0.87] | URI<br>[1.29]   | Falls<br>[0.94] |
| Southend-on-Sea      | Dermatitis<br>[1.44] | Neonatal<br>[1.06] | Asthma<br>[1.3]    | Congenital<br>[0.85] | Iron<br>[2.78]       | Anxiety<br>[1.09]    | Conduct<br>[0.97]    | Skin Viral<br>[0.87] | URI<br>[1.31]   | Falls<br>[0.95] |
| Suffolk              | Dermatitis<br>[1.44] | Neonatal<br>[0.94] | Asthma<br>[1.28]   | Iron<br>[3.15]       | Congenital<br>[0.71] | Anxiety<br>[1.07]    | Conduct<br>[0.97]    | Skin Viral<br>[0.87] | URI<br>[1.31]   | Falls<br>[0.91] |
| Thurrock             | Dermatitis<br>[1.45] | Neonatal<br>[0.99] | Asthma<br>[1.29]   | Congenital<br>[0.69] | Iron<br>[2.41]       | Anxiety<br>[1.1]     | Conduct<br>[0.96]    | Skin Viral<br>[0.87] | URI<br>[1.32]   | Falls<br>[0.92] |
| Greater London       | Dermatitis<br>[1.46] | Asthma<br>[1.75]   | Neonatal<br>[1.05] | Iron<br>[6.32]       | Congenital<br>[0.93] | Anxiety<br>[1.02]    | Conduct<br>[1.01]    | Skin Viral<br>[0.91] | URI<br>[1.24]   | Falls<br>[0.8]  |
| Barking & Dagenham   | Dermatitis<br>[1.87] | Iron<br>[4.98]     | Asthma<br>[1.49]   | Neonatal<br>[0.98]   | Congenital<br>[0.7]  | Anxiety<br>[1.09]    | Conduct<br>[0.97]    | Skin Viral<br>[0.86] | URI<br>[1.31]   | Falls<br>[0.93] |
| Barnet               | Dermatitis<br>[1.43] | Asthma<br>[1.63]   | Neonatal<br>[0.97] | Iron<br>[5.0]        | Congenital<br>[0.8]  | Anxiety<br>[1.04]    | Conduct<br>[0.99]    | Skin Viral<br>[0.89] | URI<br>[1.27]   | Falls<br>[0.84] |
| Bexley               | Dermatitis<br>[1.43] | Asthma<br>[1.55]   | Neonatal<br>[0.92] | Iron<br>[4.25]       | Congenital<br>[0.76] | Anxiety<br>[1.07]    | Conduct<br>[0.97]    | Skin Viral<br>[0.87] | URI<br>[1.31]   | Falls<br>[0.91] |
| Brent                | Dermatitis<br>[1.43] | Asthma<br>[1.63]   | Neonatal<br>[1.03] | Iron<br>[5.4]        | Congenital<br>[0.82] | Anxiety<br>[1.04]    | Conduct<br>[0.99]    | Skin Viral<br>[0.88] | URI<br>[1.26]   | Falls<br>[0.86] |
| Bromley              | Dermatitis<br>[1.44] | Neonatal<br>[1.1]  | Asthma<br>[1.6]    | Congenital<br>[0.82] | Anxiety<br>[1.05]    | Conduct<br>[0.98]    | Skin Viral<br>[0.89] | URI<br>[1.29]        | Falls<br>[0.87] | Iron<br>[2.14]  |
| Camden               | Dermatitis<br>[1.46] | Asthma<br>[1.88]   | Neonatal<br>[0.92] | Congenital<br>[1.05] | Anxiety<br>[1.0]     | Iron<br>[6.63]       | Conduct<br>[1.04]    | Skin Viral<br>[0.94] | URI<br>[1.24]   | Falls<br>[0.79] |
| Croydon              | Dermatitis<br>[1.44] | Asthma<br>[1.56]   | Neonatal<br>[0.98] | Iron<br>[4.66]       | Congenital<br>[0.71] | Anxiety<br>[1.06]    | Conduct<br>[0.97]    | Skin Viral<br>[0.88] | URI<br>[1.29]   | Falls<br>[0.87] |
| Ealing               | Dermatitis<br>[1.43] | Neonatal<br>[1.11] | Asthma<br>[1.64]   | Iron<br>[6.63]       | Anxiety<br>[1.04]    | Congenital<br>[0.76] | Conduct<br>[0.99]    | Skin Viral<br>[0.89] | URI<br>[1.26]   | Falls<br>[0.83] |
| Enfield              | Dermatitis<br>[1.44] | Asthma<br>[1.59]   | Neonatal<br>[1.03] | Iron<br>[4.61]       | Congenital<br>[0.83] | Anxiety<br>[1.06]    | Conduct<br>[0.98]    | Skin Viral<br>[0.88] | URI<br>[1.29]   | Falls<br>[0.89] |
| Greenwich            | Dermatitis<br>[1.43] | Asthma<br>[1.54]   | Neonatal<br>[0.95] | Iron<br>[3.76]       | Anxiety<br>[1.06]    | Congenital<br>[0.69] | Conduct<br>[0.98]    | Skin Viral<br>[0.87] | URI<br>[1.28]   | Falls<br>[0.85] |
| Hackney              | Dermatitis<br>[1.45] | Asthma<br>[1.8]    | Neonatal<br>[1.02] | Congenital<br>[0.93] | Anxiety<br>[1.03]    | Iron<br>[4.28]       | Conduct<br>[0.99]    | Skin Viral<br>[0.91] | URI<br>[1.24]   | Falls<br>[0.83] |
| Hammersmith & Fulham | Dermatitis<br>[1.46] | Asthma<br>[1.85]   | Neonatal<br>[1.03] | Congenital<br>[0.94] | Anxiety<br>[1.01]    | Conduct<br>[1.03]    | Skin Viral<br>[0.94] | URI<br>[1.23]        | Falls<br>[0.76] | Iron<br>[3.1]   |

**eFigure 7d. Leading ten causes of DALYs with the ratio of observed DALYs to DALYs expected on the basis of Socio-Demographic Index alone in 2017, 5-9 years, both sexes combined.** The top ten causes contributing to DALYs are listed globally, by socio-demographic quintile, and then by GBD superregion, region, country, and subnationally where modeled. For each cell, the ratio of observed DALYs to DALYs expected on the basis of socio-demographic index (SDI) alone are listed. Abbreviations: DALY=disability-adjusted life year, GBD=Global Burden of Disease.

Values shown in brackets represent the ratio of observed DALYs to predicted DALYs on the basis of Socio-Demographic Index (SDI), rounded to two (2) digits. Color ranges (shown below) were calculated to place a roughly equal number of cells into each bin.

| COLOR KEY:           |                      | [0.0-0.62]         | [0.62-0.79]          | [0.79-0.89]          | [0.89-0.97]          | [0.97-1.07]       | [1.07-1.26]          | [1.26-1.44]          | [1.44-2.32]       | 2.32+               |
|----------------------|----------------------|--------------------|----------------------|----------------------|----------------------|-------------------|----------------------|----------------------|-------------------|---------------------|
|                      | 1                    | 2                  | 3                    | 4                    | 5                    | 6                 | 7                    | 8                    | 9                 | 10                  |
| Haringey             | Dermatitis<br>[1.44] | Neonatal<br>[1.08] | Asthma<br>[1.61]     | Iron<br>[4.5]        | Congenital<br>[0.79] | Anxiety<br>[1.05] | Conduct<br>[0.98]    | Skin Viral<br>[0.89] | URI<br>[1.26]     | Falls<br>[0.84]     |
| Harrow               | Dermatitis<br>[1.44] | Neonatal<br>[1.12] | Asthma<br>[1.58]     | Iron<br>[5.13]       | Congenital<br>[0.8]  | Anxiety<br>[1.05] | Conduct<br>[0.98]    | Skin Viral<br>[0.89] | URI<br>[1.28]     | Falls<br>[0.85]     |
| Havering             | Dermatitis<br>[1.44] | Asthma<br>[1.54]   | Neonatal<br>[0.97]   | Congenital<br>[0.74] | Iron<br>[3.14]       | Anxiety<br>[1.07] | Conduct<br>[0.97]    | Skin Viral<br>[0.87] | URI<br>[1.31]     | Falls<br>[0.9]      |
| Hillingdon           | Dermatitis<br>[1.44] | Neonatal<br>[1.15] | Asthma<br>[1.79]     | Congenital<br>[1.25] | Iron<br>[5.48]       | Anxiety<br>[1.03] | Other MN<br>[3.5]    | Conduct<br>[1.0]     | Brain C<br>[1.48] | Skin Viral<br>[0.9] |
| Hounslow             | Dermatitis<br>[1.44] | Neonatal<br>[1.09] | Asthma<br>[1.7]      | Congenital<br>[0.88] | Iron<br>[5.0]        | Anxiety<br>[1.03] | Conduct<br>[1.0]     | Skin Viral<br>[0.9]  | URI<br>[1.25]     | Falls<br>[0.83]     |
| Islington            | Dermatitis<br>[1.45] | Asthma<br>[1.89]   | Neonatal<br>[0.89]   | Congenital<br>[1.08] | Anxiety<br>[1.01]    | Conduct<br>[1.03] | Skin Viral<br>[0.94] | URI<br>[1.23]        | Iron<br>[4.37]    | Falls<br>[0.8]      |
| Kensington & Chelsea | Dermatitis<br>[1.45] | Asthma<br>[1.86]   | Neonatal<br>[0.89]   | Iron<br>[8.37]       | Congenital<br>[0.92] | Anxiety<br>[0.99] | Conduct<br>[1.05]    | Skin Viral<br>[0.94] | URI<br>[1.23]     | Falls<br>[0.76]     |
| Kingston upon Thames | Dermatitis<br>[1.44] | Neonatal<br>[1.09] | Asthma<br>[1.73]     | Congenital<br>[0.9]  | Anxiety<br>[1.02]    | Conduct<br>[1.0]  | Iron<br>[4.1]        | Skin Viral<br>[0.91] | URI<br>[1.26]     | Falls<br>[0.8]      |
| Lambeth              | Dermatitis<br>[1.44] | Asthma<br>[1.76]   | Iron<br>[7.47]       | Neonatal<br>[0.75]   | Congenital<br>[0.94] | Anxiety<br>[1.02] | Conduct<br>[1.01]    | Skin Viral<br>[0.92] | URI<br>[1.23]     | Falls<br>[0.79]     |
| Lewisham             | Dermatitis<br>[1.43] | Neonatal<br>[1.18] | Asthma<br>[1.58]     | Iron<br>[3.96]       | Congenital<br>[0.73] | Anxiety<br>[1.06] | Conduct<br>[0.98]    | Skin Viral<br>[0.88] | URI<br>[1.27]     | Falls<br>[0.85]     |
| Merton               | Dermatitis<br>[1.43] | Asthma<br>[1.68]   | Neonatal<br>[1.04]   | Iron<br>[5.71]       | Congenital<br>[0.84] | Anxiety<br>[1.03] | Conduct<br>[0.99]    | Skin Viral<br>[0.9]  | URI<br>[1.26]     | Falls<br>[0.82]     |
| Newham               | Dermatitis<br>[1.44] | Neonatal<br>[1.06] | Asthma<br>[1.61]     | Congenital<br>[0.8]  | Anxiety<br>[1.06]    | Iron<br>[3.29]    | Conduct<br>[0.98]    | Skin Viral<br>[0.88] | URI<br>[1.27]     | Falls<br>[0.86]     |
| Redbridge            | Dermatitis<br>[1.44] | Asthma<br>[1.55]   | Neonatal<br>[0.98]   | Iron<br>[4.4]        | Congenital<br>[0.79] | Anxiety<br>[1.06] | Conduct<br>[0.98]    | Skin Viral<br>[0.87] | URI<br>[1.29]     | Falls<br>[0.89]     |
| Richmond upon Thames | Dermatitis<br>[1.44] | Neonatal<br>[1.15] | Asthma<br>[1.76]     | Congenital<br>[1.08] | Iron<br>[6.01]       | Anxiety<br>[1.02] | Conduct<br>[1.01]    | Skin Viral<br>[0.91] | URI<br>[1.26]     | Other MN<br>[2.77]  |
| Southwark            | Dermatitis<br>[1.45] | Asthma<br>[1.84]   | Neonatal<br>[0.77]   | Congenital<br>[1.01] | Anxiety<br>[1.01]    | Iron<br>[5.39]    | Conduct<br>[1.02]    | Skin Viral<br>[0.92] | URI<br>[1.23]     | Falls<br>[0.82]     |
| Sutton               | Dermatitis<br>[1.43] | Neonatal<br>[1.25] | Asthma<br>[1.6]      | Iron<br>[4.31]       | Congenital<br>[0.82] | Anxiety<br>[1.05] | Conduct<br>[0.98]    | Skin Viral<br>[0.88] | URI<br>[1.28]     | Falls<br>[0.87]     |
| Tower Hamlets        | Dermatitis<br>[1.45] | Neonatal<br>[1.13] | Asthma<br>[1.84]     | Congenital<br>[1.02] | Anxiety<br>[1.01]    | Iron<br>[5.16]    | Conduct<br>[1.01]    | Skin Viral<br>[0.92] | URI<br>[1.23]     | Falls<br>[0.81]     |
| Waltham Forest       | Dermatitis<br>[1.44] | Asthma<br>[1.53]   | Neonatal<br>[0.99]   | Iron<br>[4.15]       | Congenital<br>[0.76] | Anxiety<br>[1.07] | Conduct<br>[0.97]    | Skin Viral<br>[0.87] | URI<br>[1.28]     | Falls<br>[0.91]     |
| Wandsworth           | Dermatitis<br>[1.45] | Asthma<br>[1.77]   | Neonatal<br>[0.92]   | Congenital<br>[0.91] | Anxiety<br>[1.01]    | Iron<br>[5.41]    | Conduct<br>[1.02]    | Skin Viral<br>[0.93] | URI<br>[1.24]     | Falls<br>[0.77]     |
| Westminster          | Dermatitis<br>[1.46] | Asthma<br>[1.88]   | Neonatal<br>[0.83]   | Iron<br>[6.92]       | Congenital<br>[0.92] | Anxiety<br>[1.0]  | Conduct<br>[1.04]    | Skin Viral<br>[0.94] | URI<br>[1.22]     | Falls<br>[0.77]     |
| NE England           | Dermatitis<br>[1.55] | Iron<br>[4.59]     | Neonatal<br>[0.88]   | Asthma<br>[1.3]      | Congenital<br>[0.84] | Anxiety<br>[1.07] | Conduct<br>[0.97]    | Skin Viral<br>[0.87] | URI<br>[1.3]      | Falls<br>[0.9]      |
| County Durham        | Dermatitis<br>[1.72] | Iron<br>[4.73]     | Neonatal<br>[0.95]   | Asthma<br>[1.29]     | Congenital<br>[0.79] | Anxiety<br>[1.09] | Conduct<br>[0.96]    | Skin Viral<br>[0.87] | URI<br>[1.31]     | Falls<br>[0.91]     |
| Darlington           | Dermatitis<br>[1.43] | Iron<br>[5.15]     | Asthma<br>[1.33]     | Neonatal<br>[0.86]   | Congenital<br>[0.89] | Anxiety<br>[1.06] | Conduct<br>[0.98]    | Skin Viral<br>[0.87] | URI<br>[1.3]      | Falls<br>[0.9]      |
| Gateshead            | Dermatitis<br>[1.69] | Iron<br>[5.85]     | Neonatal<br>[0.98]   | Asthma<br>[1.32]     | Congenital<br>[0.85] | Anxiety<br>[1.07] | Conduct<br>[0.96]    | Skin Viral<br>[0.87] | URI<br>[1.29]     | Falls<br>[0.9]      |
| Hartlepool           | Dermatitis<br>[1.45] | Neonatal<br>[1.0]  | Asthma<br>[1.29]     | Iron<br>[2.77]       | Congenital<br>[0.79] | Anxiety<br>[1.1]  | Conduct<br>[0.97]    | Skin Viral<br>[0.86] | URI<br>[1.31]     | Falls<br>[0.92]     |
| Middlesbrough        | Dermatitis<br>[1.44] | Asthma<br>[1.33]   | Congenital<br>[0.94] | Neonatal<br>[0.77]   | Iron<br>[3.06]       | Anxiety<br>[1.09] | Conduct<br>[0.97]    | Skin Viral<br>[0.87] | URI<br>[1.3]      | Falls<br>[0.94]     |
| Newcastle upon Tyne  | Dermatitis<br>[1.43] | Asthma<br>[1.42]   | Neonatal<br>[0.84]   | Congenital<br>[0.91] | Iron<br>[5.02]       | Anxiety<br>[1.03] | Conduct<br>[1.0]     | Skin Viral<br>[0.89] | URI<br>[1.26]     | Falls<br>[0.81]     |
| N Tyneside           | Dermatitis<br>[1.43] | Asthma<br>[1.32]   | Iron<br>[4.64]       | Neonatal<br>[0.82]   | Congenital<br>[0.87] | Anxiety<br>[1.07] | Conduct<br>[0.98]    | Skin Viral<br>[0.87] | URI<br>[1.29]     | Falls<br>[0.93]     |
| Northumberland       | Dermatitis<br>[1.44] | Neonatal<br>[0.85] | Asthma<br>[1.28]     | Iron<br>[3.64]       | Congenital<br>[0.77] | Anxiety<br>[1.08] | Conduct<br>[0.98]    | Skin Viral<br>[0.86] | URI<br>[1.31]     | Falls<br>[0.91]     |
| Redcar & Cleveland   | Dermatitis<br>[1.45] | Iron<br>[3.71]     | Asthma<br>[1.29]     | Congenital<br>[0.95] | Neonatal<br>[0.8]    | Anxiety<br>[1.1]  | Conduct<br>[0.98]    | Skin Viral<br>[0.86] | URI<br>[1.33]     | Falls<br>[1.0]      |
| S Tyneside           | Dermatitis<br>[1.73] | Iron<br>[3.29]     | Asthma<br>[1.27]     | Neonatal<br>[0.84]   | Congenital<br>[0.79] | Anxiety<br>[1.1]  | Conduct<br>[0.96]    | Skin Viral<br>[0.87] | URI<br>[1.33]     | Falls<br>[0.94]     |

**eFigure 7d. Leading ten causes of DALYs with the ratio of observed DALYs to DALYs expected on the basis of Socio-Demographic Index alone in 2017, 5-9 years, both sexes combined.** The top ten causes contributing to DALYs are listed globally, by socio-demographic quintile, and then by GBD superregion, region, country, and subnationally where modeled. For each cell, the ratio of observed DALYs to DALYs expected on the basis of socio-demographic index (SDI) alone are listed. Abbreviations: DALY=disability-adjusted life year, GBD=Global Burden of Disease.

Values shown in brackets represent the ratio of observed DALYs to predicted DALYs on the basis of Socio-Demographic Index (SDI), rounded to two (2) digits. Color ranges (shown below) were calculated to place a roughly equal number of cells into each bin.

| COLOR KEY:            |                      | [0.0-0.62]         | [0.62-0.79]       | [0.79-0.89]          | [0.89-0.97]          | [0.97-1.07]       | [1.07-1.26]          | [1.26-1.44]          | [1.44-2.32]     | 2.32+              |
|-----------------------|----------------------|--------------------|-------------------|----------------------|----------------------|-------------------|----------------------|----------------------|-----------------|--------------------|
|                       | 1                    | 2                  | 3                 | 4                    | 5                    | 6                 | 7                    | 8                    | 9               | 10                 |
| Stockton-on-Tees      | Dermatitis<br>[1.44] | Neonatal<br>[1.07] | Asthma<br>[1.34]  | Iron<br>[4.7]        | Congenital<br>[0.87] | Anxiety<br>[1.08] | Conduct<br>[0.97]    | Skin Viral<br>[0.87] | URI<br>[1.3]    | Falls<br>[0.9]     |
| Sunderland            | Dermatitis<br>[1.71] | Iron<br>[4.99]     | Asthma<br>[1.15]  | Neonatal<br>[0.75]   | Congenital<br>[0.83] | Anxiety<br>[1.08] | Conduct<br>[0.97]    | Skin Viral<br>[0.87] | URI<br>[1.3]    | Falls<br>[0.91]    |
| NW England            | Dermatitis<br>[1.44] | Neonatal<br>[1.09] | Asthma<br>[1.36]  | Congenital<br>[0.9]  | Iron<br>[3.3]        | Anxiety<br>[1.06] | Conduct<br>[0.98]    | Skin Viral<br>[0.88] | URI<br>[1.28]   | Falls<br>[0.91]    |
| Blackburn with Darwen | Dermatitis<br>[1.45] | Neonatal<br>[1.07] | Asthma<br>[1.33]  | Congenital<br>[0.88] | Iron<br>[2.41]       | Anxiety<br>[1.1]  | Conduct<br>[0.97]    | Skin Viral<br>[0.87] | URI<br>[1.3]    | Falls<br>[0.96]    |
| Blackpool             | Dermatitis<br>[1.46] | Neonatal<br>[1.03] | Asthma<br>[1.27]  | Iron<br>[2.14]       | Congenital<br>[0.68] | Anxiety<br>[1.12] | Conduct<br>[0.97]    | Skin Viral<br>[0.87] | URI<br>[1.33]   | Falls<br>[0.98]    |
| Bolton                | Dermatitis<br>[1.44] | Neonatal<br>[1.02] | Asthma<br>[1.32]  | Congenital<br>[0.91] | Iron<br>[2.58]       | Anxiety<br>[1.09] | Conduct<br>[0.97]    | Skin Viral<br>[0.87] | URI<br>[1.3]    | Falls<br>[0.97]    |
| Bury                  | Dermatitis<br>[1.44] | Neonatal<br>[0.98] | Asthma<br>[1.29]  | Iron<br>[3.34]       | Congenital<br>[0.83] | Anxiety<br>[1.07] | Conduct<br>[0.98]    | Skin Viral<br>[0.87] | URI<br>[1.29]   | Falls<br>[0.93]    |
| Cheshire E            | Dermatitis<br>[1.43] | Neonatal<br>[1.35] | Asthma<br>[1.42]  | Congenital<br>[1.03] | Anxiety<br>[1.03]    | Conduct<br>[1.0]  | Skin Viral<br>[0.89] | URI<br>[1.27]        | Iron<br>[3.15]  | Falls<br>[0.85]    |
| Cheshire W & Chester  | Dermatitis<br>[1.44] | Neonatal<br>[1.11] | Asthma<br>[1.39]  | Congenital<br>[1.03] | Anxiety<br>[1.05]    | Iron<br>[3.29]    | Conduct<br>[0.99]    | Skin Viral<br>[0.89] | URI<br>[1.27]   | Falls<br>[0.88]    |
| Cumbria               | Dermatitis<br>[1.43] | Neonatal<br>[1.08] | Asthma<br>[1.31]  | Congenital<br>[0.77] | Iron<br>[3.23]       | Anxiety<br>[1.07] | Conduct<br>[0.97]    | Skin Viral<br>[0.87] | URI<br>[1.29]   | Falls<br>[0.89]    |
| Halton                | Dermatitis<br>[1.44] | Neonatal<br>[1.11] | Asthma<br>[1.38]  | Congenital<br>[1.05] | Iron<br>[3.56]       | Anxiety<br>[1.08] | Conduct<br>[0.97]    | Skin Viral<br>[0.87] | URI<br>[1.29]   | Falls<br>[0.96]    |
| Knowsley              | Dermatitis<br>[1.44] | Neonatal<br>[1.05] | Asthma<br>[1.33]  | Congenital<br>[0.98] | Iron<br>[3.6]        | Anxiety<br>[1.08] | Conduct<br>[0.97]    | Skin Viral<br>[0.87] | URI<br>[1.29]   | Falls<br>[0.95]    |
| Lancashire            | Dermatitis<br>[1.43] | Neonatal<br>[1.05] | Asthma<br>[1.35]  | Congenital<br>[0.91] | Iron<br>[3.21]       | Anxiety<br>[1.07] | Conduct<br>[0.98]    | Skin Viral<br>[0.87] | URI<br>[1.29]   | Falls<br>[0.93]    |
| Liverpool             | Dermatitis<br>[1.44] | Neonatal<br>[1.19] | Asthma<br>[1.39]  | Congenital<br>[1.06] | Anxiety<br>[0.97]    | Conduct<br>[0.98] | Skin Viral<br>[0.88] | URI<br>[1.27]        | Falls<br>[0.91] | Iron<br>[2.39]     |
| Manchester            | Dermatitis<br>[1.44] | Neonatal<br>[1.2]  | Asthma<br>[1.5]   | Congenital<br>[0.99] | Anxiety<br>[1.02]    | Conduct<br>[1.0]  | Skin Viral<br>[0.91] | URI<br>[1.24]        | Falls<br>[0.84] | Iron<br>[3.07]     |
| Oldham                | Dermatitis<br>[1.45] | Asthma<br>[1.32]   | Neonatal<br>[0.8] | Congenital<br>[0.77] | Iron<br>[2.06]       | Anxiety<br>[1.12] | Conduct<br>[0.96]    | Skin Viral<br>[0.87] | URI<br>[1.32]   | Falls<br>[0.95]    |
| Rochdale              | Dermatitis<br>[1.44] | Iron<br>[3.26]     | Asthma<br>[1.28]  | Neonatal<br>[0.83]   | Congenital<br>[0.68] | Anxiety<br>[1.1]  | Conduct<br>[0.97]    | Skin Viral<br>[0.86] | URI<br>[1.32]   | Falls<br>[0.92]    |
| Salford               | Dermatitis<br>[1.44] | Neonatal<br>[1.22] | Asthma<br>[1.38]  | Congenital<br>[0.92] | Anxiety<br>[1.06]    | Conduct<br>[0.98] | Skin Viral<br>[0.88] | URI<br>[1.27]        | Falls<br>[0.91] | Iron<br>[2.18]     |
| Sefton                | Dermatitis<br>[1.44] | Neonatal<br>[1.08] | Asthma<br>[1.29]  | Congenital<br>[0.86] | Iron<br>[3.1]        | Anxiety<br>[1.08] | Conduct<br>[0.97]    | Skin Viral<br>[0.86] | URI<br>[1.31]   | Falls<br>[0.94]    |
| St Helens             | Dermatitis<br>[1.44] | Neonatal<br>[1.09] | Asthma<br>[1.28]  | Congenital<br>[0.84] | Iron<br>[2.86]       | Anxiety<br>[1.09] | Conduct<br>[0.96]    | Skin Viral<br>[0.87] | URI<br>[1.3]    | Falls<br>[0.94]    |
| Stockport             | Dermatitis<br>[1.43] | Neonatal<br>[0.92] | Asthma<br>[1.34]  | Congenital<br>[0.84] | Iron<br>[3.93]       | Anxiety<br>[1.05] | Conduct<br>[0.99]    | Skin Viral<br>[0.88] | URI<br>[1.29]   | Falls<br>[0.89]    |
| Tameside              | Dermatitis<br>[1.44] | Neonatal<br>[0.89] | Asthma<br>[1.3]   | Congenital<br>[0.83] | Iron<br>[2.32]       | Anxiety<br>[1.1]  | Conduct<br>[0.97]    | Skin Viral<br>[0.87] | URI<br>[1.32]   | Falls<br>[0.98]    |
| Trafford              | Dermatitis<br>[1.44] | Neonatal<br>[1.21] | Asthma<br>[1.44]  | Congenital<br>[0.96] | Iron<br>[4.83]       | Anxiety<br>[1.03] | Conduct<br>[1.0]     | Skin Viral<br>[0.9]  | URI<br>[1.25]   | Falls<br>[0.85]    |
| Warrington            | Dermatitis<br>[1.43] | Neonatal<br>[1.28] | Asthma<br>[1.41]  | Iron<br>[5.78]       | Congenital<br>[0.9]  | Anxiety<br>[1.04] | Conduct<br>[0.99]    | Skin Viral<br>[0.89] | URI<br>[1.26]   | Falls<br>[0.85]    |
| Wigan                 | Dermatitis<br>[1.44] | Neonatal<br>[1.08] | Asthma<br>[1.29]  | Congenital<br>[0.78] | Iron<br>[2.34]       | Anxiety<br>[1.09] | Conduct<br>[0.97]    | Skin Viral<br>[0.86] | URI<br>[1.33]   | Falls<br>[0.95]    |
| Wirral                | Dermatitis<br>[1.44] | Neonatal<br>[1.21] | Asthma<br>[1.29]  | Congenital<br>[0.89] | Iron<br>[1.09]       | Anxiety<br>[1.98] | Conduct<br>[0.97]    | Skin Viral<br>[0.87] | URI<br>[1.31]   | Falls<br>[0.93]    |
| SE England            | Dermatitis<br>[1.57] | Neonatal<br>[1.02] | Asthma<br>[1.47]  | Congenital<br>[0.8]  | Anxiety<br>[1.05]    | Iron<br>[3.57]    | Conduct<br>[0.99]    | Skin Viral<br>[0.89] | URI<br>[1.28]   | Falls<br>[0.85]    |
| Bracknell Forest      | Dermatitis<br>[1.43] | Asthma<br>[1.38]   | Neonatal<br>[0.8] | Congenital<br>[0.89] | Anxiety<br>[1.04]    | Conduct<br>[1.0]  | Skin Viral<br>[0.9]  | URI<br>[1.27]        | Falls<br>[0.85] | Iron<br>[2.17]     |
| Brighton & Hove       | Dermatitis<br>[1.7]  | Neonatal<br>[1.12] | Asthma<br>[1.46]  | Congenital<br>[1.1]  | Iron<br>[5.15]       | Anxiety<br>[1.03] | Conduct<br>[1.0]     | Skin Viral<br>[0.91] | URI<br>[1.24]   | Falls<br>[0.86]    |
| Buckinghamshire       | Dermatitis<br>[1.43] | Neonatal<br>[1.15] | Asthma<br>[1.36]  | Congenital<br>[0.87] | Anxiety<br>[1.04]    | Iron<br>[3.68]    | Conduct<br>[0.99]    | Skin Viral<br>[0.89] | URI<br>[1.28]   | Epilepsy<br>[1.62] |
| E Sussex              | Dermatitis<br>[1.67] | Neonatal<br>[1.06] | Asthma<br>[1.22]  | Congenital<br>[0.76] | Iron<br>[2.83]       | Anxiety<br>[1.08] | Conduct<br>[0.98]    | Skin Viral<br>[0.86] | URI<br>[1.31]   | Falls<br>[0.91]    |

**eFigure 7d. Leading ten causes of DALYs with the ratio of observed DALYs to DALYs expected on the basis of Socio-Demographic Index alone in 2017, 5-9 years, both sexes combined.** The top ten causes contributing to DALYs are listed globally, by socio-demographic quintile, and then by GBD superregion, region, country, and subnationally where modeled. For each cell, the ratio of observed DALYs to DALYs expected on the basis of socio-demographic index (SDI) alone are listed. Abbreviations: DALY=disability-adjusted life year, GBD=Global Burden of Disease.

Values shown in brackets represent the ratio of observed DALYs to predicted DALYs on the basis of Socio-Demographic Index (SDI), rounded to two (2) digits. Color ranges (shown below) were calculated to place a roughly equal number of cells into each bin.

| COLOR KEY:           |                      | [0.0-0.62]         | [0.62-0.79]        | [0.79-0.89]          | [0.89-0.97]          | [0.97-1.07]          | [1.07-1.26]          | [1.26-1.44]          | [1.44-2.32]     | 2.32+             |
|----------------------|----------------------|--------------------|--------------------|----------------------|----------------------|----------------------|----------------------|----------------------|-----------------|-------------------|
|                      | 1                    | 2                  | 3                  | 4                    | 5                    | 6                    | 7                    | 8                    | 9               | 10                |
| Hampshire            | Dermatitis<br>[1.43] | Asthma<br>[2.06]   | Neonatal<br>[0.99] | Iron<br>[3.84]       | Congenital<br>[0.73] | Anxiety<br>[1.05]    | Conduct<br>[0.98]    | Skin Viral<br>[0.88] | URI<br>[1.29]   | Falls<br>[0.85]   |
| Isle of Wight        | Dermatitis<br>[1.41] | Asthma<br>[1.96]   | Neonatal<br>[0.92] | Iron<br>[3.33]       | Congenital<br>[0.69] | Anxiety<br>[1.08]    | Conduct<br>[0.97]    | Skin Viral<br>[0.87] | URI<br>[1.3]    | Falls<br>[0.9]    |
| Kent                 | Dermatitis<br>[1.67] | Neonatal<br>[0.98] | Asthma<br>[1.26]   | Congenital<br>[0.7]  | Anxiety<br>[1.07]    | Iron<br>[2.67]       | Conduct<br>[0.98]    | Skin Viral<br>[0.87] | URI<br>[1.3]    | ASD<br>[1.55]     |
| Medway               | Dermatitis<br>[1.44] | Neonatal<br>[1.03] | Asthma<br>[1.26]   | Iron<br>[2.98]       | Congenital<br>[0.78] | Anxiety<br>[1.09]    | Conduct<br>[0.96]    | Skin Viral<br>[0.87] | URI<br>[1.31]   | Falls<br>[0.92]   |
| Milton Keynes        | Dermatitis<br>[1.43] | Asthma<br>[1.41]   | Neonatal<br>[0.88] | Congenital<br>[0.93] | Anxiety<br>[1.04]    | Conduct<br>[0.99]    | Skin Viral<br>[0.89] | URI<br>[1.27]        | Iron<br>[2.87]  | Falls<br>[0.9]    |
| Oxfordshire          | Dermatitis<br>[1.87] | Neonatal<br>[0.94] | Asthma<br>[1.39]   | Iron<br>[5.55]       | Congenital<br>[0.85] | Anxiety<br>[1.03]    | Conduct<br>[0.99]    | Skin Viral<br>[0.9]  | URI<br>[1.26]   | Falls<br>[0.81]   |
| Portsmouth           | Dermatitis<br>[1.44] | Neonatal<br>[0.97] | Asthma<br>[1.33]   | Iron<br>[4.95]       | Congenital<br>[1.05] | Anxiety<br>[0.74]    | Conduct<br>[0.99]    | Skin Viral<br>[0.89] | URI<br>[1.26]   | Falls<br>[0.84]   |
| Reading              | Dermatitis<br>[1.87] | Neonatal<br>[1.22] | Asthma<br>[1.47]   | Congenital<br>[0.93] | Anxiety<br>[1.02]    | Conduct<br>[1.01]    | Skin Viral<br>[0.91] | URI<br>[1.24]        | Iron<br>[3.78]  | Falls<br>[0.81]   |
| Slough               | Dermatitis<br>[1.43] | Neonatal<br>[1.06] | Asthma<br>[1.43]   | Congenital<br>[0.89] | Anxiety<br>[1.05]    | Conduct<br>[0.99]    | Skin Viral<br>[0.89] | URI<br>[1.26]        | Falls<br>[0.86] | Iron<br>[2.41]    |
| Southampton          | Dermatitis<br>[1.43] | Neonatal<br>[0.96] | Asthma<br>[1.34]   | Iron<br>[4.07]       | Congenital<br>[0.75] | Anxiety<br>[1.04]    | Conduct<br>[0.99]    | Skin Viral<br>[0.89] | URI<br>[1.27]   | Falls<br>[0.84]   |
| Surrey               | Dermatitis<br>[1.66] | Neonatal<br>[1.11] | Asthma<br>[1.4]    | Congenital<br>[0.88] | Anxiety<br>[1.02]    | Conduct<br>[1.0]     | Skin Viral<br>[0.91] | URI<br>[1.27]        | Falls<br>[0.81] | Iron<br>[2.81]    |
| West Berkshire       | Dermatitis<br>[1.43] | Neonatal<br>[0.93] | Asthma<br>[1.39]   | Congenital<br>[0.88] | Anxiety<br>[1.04]    | Iron<br>[3.72]       | Conduct<br>[1.0]     | Skin Viral<br>[0.89] | URI<br>[1.26]   | Falls<br>[0.84]   |
| W Sussex             | Dermatitis<br>[1.48] | Neonatal<br>[1.02] | Asthma<br>[1.51]   | Iron<br>[4.18]       | Congenital<br>[0.73] | Anxiety<br>[1.05]    | Conduct<br>[0.99]    | Skin Viral<br>[0.88] | URI<br>[1.29]   | Falls<br>[0.85]   |
| Windsor & Maidenhead | Dermatitis<br>[1.44] | Neonatal<br>[0.97] | Asthma<br>[1.43]   | Congenital<br>[0.87] | Anxiety<br>[1.02]    | Conduct<br>[1.02]    | Skin Viral<br>[0.9]  | URI<br>[1.25]        | Iron<br>[3.45]  | Falls<br>[0.8]    |
| Wokingham            | Dermatitis<br>[1.44] | Neonatal<br>[1.0]  | Asthma<br>[1.41]   | Congenital<br>[0.92] | Anxiety<br>[1.02]    | Iron<br>[4.25]       | Conduct<br>[1.01]    | Skin Viral<br>[0.91] | URI<br>[1.27]   | Falls<br>[0.83]   |
| SW England           | Dermatitis<br>[1.43] | Neonatal<br>[1.05] | Iron<br>[5.7]      | Asthma<br>[1.3]      | Congenital<br>[0.73] | Anxiety<br>[1.06]    | Conduct<br>[0.98]    | Skin Viral<br>[0.88] | URI<br>[1.29]   | Falls<br>[0.88]   |
| Bath & NE Somerset   | Dermatitis<br>[1.43] | Neonatal<br>[1.41] | Iron<br>[8.02]     | Asthma<br>[1.37]     | Anxiety<br>[1.03]    | Congenital<br>[0.75] | Conduct<br>[1.0]     | Skin Viral<br>[0.89] | URI<br>[1.26]   | Falls<br>[0.82]   |
| Bournemouth          | Dermatitis<br>[1.44] | Iron<br>[7.82]     | Neonatal<br>[1.04] | Asthma<br>[1.34]     | Anxiety<br>[1.05]    | Congenital<br>[0.72] | Conduct<br>[0.98]    | Skin Viral<br>[0.89] | URI<br>[1.27]   | Falls<br>[0.84]   |
| Bristol              | Dermatitis<br>[1.44] | Neonatal<br>[1.22] | Iron<br>[8.25]     | Asthma<br>[1.42]     | Anxiety<br>[1.03]    | Congenital<br>[0.75] | Conduct<br>[1.0]     | Skin Viral<br>[0.9]  | URI<br>[1.25]   | Falls<br>[0.79]   |
| Cornwall             | Dermatitis<br>[1.44] | Iron<br>[6.67]     | Neonatal<br>[1.03] | Asthma<br>[1.26]     | Congenital<br>[0.7]  | Anxiety<br>[1.08]    | Conduct<br>[0.97]    | Skin Viral<br>[0.87] | URI<br>[1.3]    | Falls<br>[0.93]   |
| Devon                | Dermatitis<br>[1.43] | Neonatal<br>[0.95] | Asthma<br>[1.28]   | Iron<br>[4.2]        | Congenital<br>[0.72] | Anxiety<br>[1.06]    | Conduct<br>[0.98]    | Skin Viral<br>[0.87] | URI<br>[1.29]   | Falls<br>[0.9]    |
| Dorset               | Dermatitis<br>[1.44] | Iron<br>[5.78]     | Neonatal<br>[1.01] | Asthma<br>[1.28]     | Congenital<br>[0.72] | Anxiety<br>[1.07]    | Conduct<br>[0.97]    | Skin Viral<br>[0.87] | URI<br>[1.29]   | Falls<br>[0.91]   |
| Gloucestershire      | Dermatitis<br>[1.43] | Neonatal<br>[0.97] | Asthma<br>[1.33]   | Iron<br>[3.94]       | Congenital<br>[0.78] | Anxiety<br>[1.06]    | Conduct<br>[0.98]    | Skin Viral<br>[0.88] | URI<br>[1.28]   | Falls<br>[0.88]   |
| N Somerset           | Dermatitis<br>[1.43] | Neonatal<br>[1.13] | Iron<br>[6.29]     | Asthma<br>[1.3]      | Congenital<br>[0.81] | Anxiety<br>[1.06]    | Conduct<br>[0.98]    | Skin Viral<br>[0.87] | URI<br>[1.29]   | Falls<br>[0.89]   |
| Plymouth             | Dermatitis<br>[1.44] | Neonatal<br>[1.04] | Asthma<br>[1.31]   | Iron<br>[4.17]       | Congenital<br>[0.81] | Anxiety<br>[1.06]    | Conduct<br>[0.97]    | Skin Viral<br>[0.88] | URI<br>[1.28]   | Falls<br>[0.91]   |
| Poole                | Dermatitis<br>[1.43] | Neonatal<br>[1.03] | Iron<br>[5.41]     | Asthma<br>[1.3]      | Anxiety<br>[1.05]    | Congenital<br>[0.69] | Conduct<br>[0.99]    | Skin Viral<br>[0.87] | URI<br>[1.29]   | Falls<br>[0.87]   |
| Somerset             | Dermatitis<br>[1.44] | Neonatal<br>[1.09] | Asthma<br>[1.24]   | Anxiety<br>[1.09]    | Iron<br>[2.52]       | Congenital<br>[0.62] | Conduct<br>[0.97]    | Skin Viral<br>[0.87] | URI<br>[1.31]   | Falls<br>[0.91]   |
| S Gloucestershire    | Dermatitis<br>[1.44] | Neonatal<br>[1.1]  | Asthma<br>[1.37]   | Iron<br>[5.57]       | Congenital<br>[0.81] | Anxiety<br>[1.04]    | Conduct<br>[0.99]    | Skin Viral<br>[0.89] | URI<br>[1.27]   | Falls<br>[0.83]   |
| Swindon              | Dermatitis<br>[1.43] | Iron<br>[8.33]     | Asthma<br>[1.35]   | Neonatal<br>[0.75]   | Congenital<br>[0.83] | Anxiety<br>[1.05]    | Conduct<br>[0.98]    | Skin Viral<br>[0.88] | URI<br>[1.29]   | Brain C<br>[1.05] |
| Torbay               | Dermatitis<br>[1.45] | Neonatal<br>[0.85] | Iron<br>[2.96]     | Asthma<br>[1.23]     | Congenital<br>[0.62] | Anxiety<br>[1.11]    | Conduct<br>[0.97]    | Skin Viral<br>[0.87] | URI<br>[1.34]   | Falls<br>[0.96]   |
| Wiltshire            | Dermatitis<br>[1.43] | Iron<br>[7.49]     | Neonatal<br>[1.2]  | Asthma<br>[1.27]     | Anxiety<br>[1.07]    | Congenital<br>[0.68] | Conduct<br>[0.97]    | Skin Viral<br>[0.87] | URI<br>[1.29]   | Falls<br>[0.88]   |

**eFigure 7d. Leading ten causes of DALYs with the ratio of observed DALYs to DALYs expected on the basis of Socio-Demographic Index alone in 2017, 5-9 years, both sexes combined.** The top ten causes contributing to DALYs are listed globally, by socio-demographic quintile, and then by GBD superregion, region, country, and subnationally where modeled. For each cell, the ratio of observed DALYs to DALYs expected on the basis of socio-demographic index (SDI) alone are listed. Abbreviations: DALY=disability-adjusted life year, GBD=Global Burden of Disease.

Values shown in brackets represent the ratio of observed DALYs to predicted DALYs on the basis of Socio-Demographic Index (SDI), rounded to two (2) digits. Color ranges (shown below) were calculated to place a roughly equal number of cells into each bin.

| COLOR KEY:            |                      | [0.0-0.62]         | [0.62-0.79]        | [0.79-0.89]          | [0.89-0.97]          | [0.97-1.07]       | [1.07-1.26]          | [1.26-1.44]          | [1.44-2.32]    | 2.32+           |
|-----------------------|----------------------|--------------------|--------------------|----------------------|----------------------|-------------------|----------------------|----------------------|----------------|-----------------|
|                       | 1                    | 2                  | 3                  | 4                    | 5                    | 6                 | 7                    | 8                    | 9              | 10              |
| W Midlands            | Dermatitis<br>[1.44] | Neonatal<br>[0.98] | Asthma<br>[1.33]   | Congenital<br>[0.83] | Iron<br>[3.62]       | Anxiety<br>[1.07] | Conduct<br>[0.98]    | Skin Viral<br>[0.87] | URI<br>[1.29]  | Falls<br>[0.94] |
| Birmingham            | Dermatitis<br>[1.44] | Neonatal<br>[0.96] | Asthma<br>[1.35]   | Congenital<br>[0.89] | Iron<br>[3.55]       | Anxiety<br>[1.06] | Conduct<br>[0.98]    | Skin Viral<br>[0.88] | URI<br>[1.28]  | Falls<br>[0.97] |
| Coventry              | Dermatitis<br>[1.44] | Neonatal<br>[0.93] | Asthma<br>[1.38]   | Congenital<br>[0.83] | Anxiety<br>[1.05]    | Iron<br>[3.23]    | Conduct<br>[0.98]    | Skin Viral<br>[0.88] | URI<br>[1.26]  | Falls<br>[0.86] |
| Dudley                | Dermatitis<br>[1.45] | Neonatal<br>[1.07] | Asthma<br>[1.31]   | Congenital<br>[0.89] | Iron<br>[2.44]       | Anxiety<br>[1.1]  | Conduct<br>[0.96]    | Skin Viral<br>[0.87] | URI<br>[1.31]  | Falls<br>[1.0]  |
| Herefordshire         | Dermatitis<br>[1.43] | Neonatal<br>[1.01] | Asthma<br>[1.29]   | Iron<br>[3.93]       | Congenital<br>[0.71] | Anxiety<br>[1.07] | Conduct<br>[0.98]    | Skin Viral<br>[0.87] | URI<br>[1.29]  | Falls<br>[0.88] |
| Sandwell              | Dermatitis<br>[1.45] | Neonatal<br>[1.06] | Asthma<br>[1.32]   | Iron<br>[2.69]       | Congenital<br>[0.81] | Anxiety<br>[1.1]  | Conduct<br>[0.97]    | Skin Viral<br>[0.86] | URI<br>[1.32]  | Falls<br>[1.0]  |
| Shropshire            | Dermatitis<br>[1.44] | Neonatal<br>[0.98] | Asthma<br>[1.29]   | Congenital<br>[0.77] | Anxiety<br>[1.07]    | Iron<br>[2.82]    | Conduct<br>[0.97]    | Skin Viral<br>[0.87] | URI<br>[1.29]  | Falls<br>[0.89] |
| Solihull              | Dermatitis<br>[1.43] | Asthma<br>[1.36]   | Neonatal<br>[0.72] | Congenital<br>[0.86] | Iron<br>[3.96]       | Anxiety<br>[1.05] | Conduct<br>[0.99]    | Skin Viral<br>[0.89] | URI<br>[1.28]  | Falls<br>[0.91] |
| Staffordshire         | Dermatitis<br>[1.44] | Neonatal<br>[0.95] | Iron<br>[4.87]     | Asthma<br>[1.3]      | Congenital<br>[0.79] | Anxiety<br>[1.07] | Conduct<br>[0.98]    | Skin Viral<br>[0.87] | URI<br>[1.3]   | Falls<br>[0.97] |
| Stoke-on-Trent        | Dermatitis<br>[1.45] | Neonatal<br>[1.17] | Asthma<br>[1.31]   | Congenital<br>[0.88] | Iron<br>[2.63]       | Anxiety<br>[1.09] | Conduct<br>[0.96]    | Skin Viral<br>[0.87] | URI<br>[1.3]   | Falls<br>[1.09] |
| Telford & Wrekin      | Dermatitis<br>[1.44] | Neonatal<br>[0.99] | Asthma<br>[1.32]   | Congenital<br>[0.89] | Anxiety<br>[1.08]    | Iron<br>[2.59]    | Conduct<br>[0.96]    | Skin Viral<br>[0.87] | URI<br>[1.3]   | Falls<br>[0.95] |
| Walsall               | Dermatitis<br>[1.45] | Neonatal<br>[0.98] | Asthma<br>[1.28]   | Iron<br>[2.26]       | Congenital<br>[0.7]  | Anxiety<br>[1.1]  | Conduct<br>[0.97]    | Skin Viral<br>[0.86] | URI<br>[1.32]  | Falls<br>[0.98] |
| Warwickshire          | Dermatitis<br>[1.44] | Neonatal<br>[1.0]  | Asthma<br>[1.37]   | Iron<br>[4.97]       | Congenital<br>[0.82] | Anxiety<br>[1.05] | Conduct<br>[0.99]    | Skin Viral<br>[0.89] | URI<br>[1.28]  | Falls<br>[0.88] |
| Wolverhampton         | Dermatitis<br>[1.44] | Asthma<br>[1.27]   | Neonatal<br>[0.72] | Congenital<br>[0.7]  | Iron<br>[2.44]       | Anxiety<br>[1.09] | Conduct<br>[0.97]    | Skin Viral<br>[0.87] | URI<br>[1.3]   | Falls<br>[0.92] |
| Worcestershire        | Dermatitis<br>[1.44] | Neonatal<br>[1.1]  | Asthma<br>[1.32]   | Congenital<br>[0.81] | Iron<br>[3.6]        | Anxiety<br>[1.07] | Conduct<br>[0.98]    | Skin Viral<br>[0.88] | URI<br>[1.3]   | Falls<br>[0.92] |
| Yorkshire & Humber    | Dermatitis<br>[1.44] | Neonatal<br>[0.92] | Asthma<br>[1.35]   | Iron<br>[3.62]       | Congenital<br>[0.8]  | Anxiety<br>[1.07] | Conduct<br>[0.97]    | Skin Viral<br>[0.87] | URI<br>[1.29]  | Falls<br>[0.89] |
| Barnsley              | Dermatitis<br>[1.45] | Neonatal<br>[0.97] | Asthma<br>[1.3]    | Iron<br>[2.31]       | Congenital<br>[0.73] | Anxiety<br>[1.12] | Conduct<br>[0.97]    | Skin Viral<br>[0.87] | URI<br>[1.34]  | Falls<br>[0.95] |
| Bradford              | Dermatitis<br>[1.44] | Neonatal<br>[1.02] | Asthma<br>[1.3]    | Iron<br>[2.89]       | Congenital<br>[0.74] | Anxiety<br>[1.1]  | Conduct<br>[0.97]    | Skin Viral<br>[0.87] | URI<br>[1.3]   | Falls<br>[0.93] |
| Calderdale            | Dermatitis<br>[1.44] | Neonatal<br>[0.89] | Asthma<br>[1.33]   | Congenital<br>[0.78] | Anxiety<br>[1.08]    | Conduct<br>[0.96] | Skin Viral<br>[0.88] | URI<br>[1.29]        | Iron<br>[2.18] | Falls<br>[0.9]  |
| Doncaster             | Dermatitis<br>[1.45] | Neonatal<br>[1.19] | Asthma<br>[1.3]    | Congenital<br>[0.76] | Anxiety<br>[1.11]    | Iron<br>[1.8]     | Conduct<br>[0.96]    | Skin Viral<br>[0.87] | URI<br>[1.34]  | Falls<br>[0.96] |
| E Riding of Yorkshire | Dermatitis<br>[1.44] | Neonatal<br>[0.91] | Asthma<br>[1.29]   | Iron<br>[3.21]       | Congenital<br>[0.66] | Anxiety<br>[1.08] | Conduct<br>[0.98]    | Skin Viral<br>[0.87] | URI<br>[1.3]   | Falls<br>[0.88] |
| Kingston upon Hull    | Dermatitis<br>[1.44] | Asthma<br>[1.37]   | Neonatal<br>[0.84] | Congenital<br>[0.81] | Anxiety<br>[1.08]    | Conduct<br>[0.97] | Iron<br>[2.16]       | Skin Viral<br>[0.87] | URI<br>[1.3]   | Falls<br>[0.94] |
| Kirklees              | Dermatitis<br>[1.44] | Asthma<br>[1.32]   | Neonatal<br>[0.86] | Congenital<br>[0.81] | Iron<br>[3.18]       | Anxiety<br>[1.08] | Conduct<br>[0.97]    | Skin Viral<br>[0.87] | URI<br>[1.3]   | Falls<br>[0.92] |
| Leeds                 | Dermatitis<br>[1.43] | Asthma<br>[1.43]   | Neonatal<br>[0.84] | Iron<br>[5.7]        | Congenital<br>[0.91] | Anxiety<br>[1.03] | Conduct<br>[0.99]    | Skin Viral<br>[0.9]  | URI<br>[1.27]  | Falls<br>[0.84] |
| NE Lincolnshire       | Dermatitis<br>[1.44] | Asthma<br>[1.35]   | Neonatal<br>[0.88] | Iron<br>[3.3]        | Congenital<br>[0.84] | Anxiety<br>[1.1]  | Conduct<br>[0.97]    | Skin Viral<br>[0.87] | URI<br>[1.31]  | Falls<br>[0.94] |
| N Lincolnshire        | Dermatitis<br>[1.44] | Asthma<br>[1.3]    | Neonatal<br>[0.82] | Iron<br>[3.44]       | Congenital<br>[0.68] | Anxiety<br>[1.09] | Conduct<br>[0.97]    | Skin Viral<br>[0.87] | URI<br>[1.3]   | Falls<br>[0.9]  |
| N Yorkshire           | Dermatitis<br>[1.43] | Neonatal<br>[1.05] | Asthma<br>[1.32]   | Iron<br>[3.75]       | Congenital<br>[0.75] | Anxiety<br>[1.06] | Conduct<br>[0.98]    | Skin Viral<br>[0.88] | URI<br>[1.28]  | Falls<br>[0.87] |
| Rotherham             | Dermatitis<br>[1.44] | Asthma<br>[1.3]    | Neonatal<br>[0.83] | Congenital<br>[0.82] | Iron<br>[2.29]       | Anxiety<br>[1.1]  | Conduct<br>[0.97]    | Skin Viral<br>[0.86] | URI<br>[1.32]  | Falls<br>[0.96] |
| Sheffield             | Dermatitis<br>[1.44] | Neonatal<br>[0.97] | Asthma<br>[1.37]   | Congenital<br>[0.81] | Iron<br>[4.14]       | Anxiety<br>[1.05] | Conduct<br>[0.98]    | Skin Viral<br>[0.89] | URI<br>[1.28]  | Falls<br>[0.85] |
| Wakefield             | Dermatitis<br>[1.44] | Asthma<br>[1.34]   | Iron<br>[3.62]     | Neonatal<br>[0.73]   | Congenital<br>[0.76] | Anxiety<br>[1.09] | Conduct<br>[0.97]    | Skin Viral<br>[0.86] | URI<br>[1.31]  | Falls<br>[0.93] |
| York                  | Dermatitis<br>[1.44] | Asthma<br>[1.45]   | Neonatal<br>[0.86] | Congenital<br>[0.89] | Anxiety<br>[1.03]    | Conduct<br>[0.99] | Iron<br>[3.89]       | Skin Viral<br>[0.9]  | URI<br>[1.26]  | Falls<br>[0.82] |

**eFigure 7d. Leading ten causes of DALYs with the ratio of observed DALYs to DALYs expected on the basis of Socio-Demographic Index alone in 2017, 5-9 years, both sexes combined.** The top ten causes contributing to DALYs are listed globally, by socio-demographic quintile, and then by GBD superregion, region, country, and subnationally where modeled. For each cell, the ratio of observed DALYs to DALYs expected on the basis of socio-demographic index (SDI) alone are listed. Abbreviations: DALY=disability-adjusted life year, GBD=Global Burden of Disease.

Values shown in brackets represent the ratio of observed DALYs to predicted DALYs on the basis of Socio-Demographic Index (SDI), rounded to two (2) digits. Color ranges (shown below) were calculated to place a roughly equal number of cells into each bin.

| COLOR KEY:                  |                       | [0.0-0.62]           | [0.62-0.79]          | [0.79-0.89]          | [0.89-0.97]          | [0.97-1.07]          | [1.07-1.26]          | [1.26-1.44]          | [1.44-2.32]          | 2.32+                |
|-----------------------------|-----------------------|----------------------|----------------------|----------------------|----------------------|----------------------|----------------------|----------------------|----------------------|----------------------|
|                             | 1                     | 2                    | 3                    | 4                    | 5                    | 6                    | 7                    | 8                    | 9                    | 10                   |
| N Ireland                   | Dermatitis<br>[1.19]  | Anxiety<br>[1.71]    | Neonatal<br>[0.84]   | Asthma<br>[1.15]     | Congenital<br>[0.75] | Skin Viral<br>[0.94] | Conduct<br>[0.88]    | URI<br>[1.27]        | Falls<br>[0.87]      | Headaches<br>[0.97]  |
| Scotland                    | Dermatitis<br>[1.29]  | Asthma<br>[1.24]     | Iron<br>[3.4]        | Neonatal<br>[0.79]   | Congenital<br>[0.82] | Anxiety<br>[1.17]    | Skin Viral<br>[0.93] | Conduct<br>[0.95]    | Vit A<br>[1.78]      | URI<br>[1.3]         |
| Wales                       | Dermatitis<br>[1.2]   | Neonatal<br>[0.81]   | Asthma<br>[1.17]     | Iron<br>[3.27]       | Congenital<br>[0.72] | Anxiety<br>[1.19]    | Skin Viral<br>[1.01] | Conduct<br>[0.95]    | URI<br>[1.31]        | Falls<br>[1.05]      |
| Latin America and Caribbean | Neonatal<br>[1.15]    | Asthma<br>[1.28]     | Road Inj<br>[0.48]   | Dermatitis<br>[0.9]  | Congenital<br>[0.6]  | Vit A<br>[0.94]      | Iron<br>[0.72]       | Diarrhea<br>[1.3]    | LRI<br>[0.58]        | Leukemia<br>[0.68]   |
| Andean Latin America        | Asthma<br>[1.6]       | Road Inj<br>[0.68]   | Dermatitis<br>[1.48] | Iron<br>[1.31]       | Neonatal<br>[1.09]   | LRI<br>[1.04]        | Congenital<br>[0.55] | Leukemia<br>[0.93]   | LRI<br>[0.77]        | Diarrhea<br>[1.2]    |
| Bolivia                     | Iron<br>[1.64]        | Asthma<br>[1.78]     | Road Inj<br>[0.7]    | Dermatitis<br>[1.58] | LRI<br>[0.81]        | Neonatal<br>[1.07]   | Diarrhea<br>[1.11]   | Congenital<br>[0.55] | Leukemia<br>[0.92]   | Vit A<br>[0.63]      |
| Ecuador                     | Road Inj<br>[0.97]    | Asthma<br>[1.48]     | Neonatal<br>[1.12]   | Dermatitis<br>[1.3]  | LRI<br>[0.98]        | Congenital<br>[0.59] | Leukemia<br>[1.04]   | Diarrhea<br>[1.27]   | Epilepsy<br>[1.11]   | Drown<br>[0.47]      |
| Peru                        | Iron<br>[1.63]        | Dermatitis<br>[1.54] | Asthma<br>[1.58]     | Neonatal<br>[1.1]    | LRI<br>[1.09]        | Road Inj<br>[0.51]   | Vit A<br>[1.0]       | Congenital<br>[0.53] | Leukemia<br>[0.86]   | F Body<br>[2.18]     |
| Caribbean                   | Road Inj<br>[0.96]    | Iron<br>[1.84]       | Asthma<br>[1.85]     | Dermatitis<br>[1.15] | Neonatal<br>[0.93]   | Congenital<br>[0.71] | Drown<br>[0.73]      | Vit A<br>[1.02]      | Disaster<br>[169.05] | LRI<br>[0.74]        |
| Antigua                     | Iron<br>[4.36]        | Asthma<br>[1.97]     | Dermatitis<br>[1.08] | Neonatal<br>[0.96]   | Drown<br>[1.23]      | Congenital<br>[0.63] | Vit A<br>[0.97]      | Epilepsy<br>[1.17]   | Road Inj<br>[0.32]   | Skin Viral<br>[0.8]  |
| Bahamas                     | Asthma<br>[2.13]      | Dermatitis<br>[1.07] | Neonatal<br>[0.96]   | Drown<br>[1.61]      | Congenital<br>[0.69] | Road Inj<br>[0.62]   | Iron<br>[1.35]       | Skin Viral<br>[0.8]  | Anxiety<br>[0.85]    | Diarrhea<br>[1.46]   |
| Barbados                    | Asthma<br>[1.85]      | Neonatal<br>[1.04]   | Dermatitis<br>[1.05] | Congenital<br>[0.62] | Iron<br>[1.04]       | Skin Viral<br>[0.8]  | Anxiety<br>[0.86]    | Headaches<br>[1.31]  | Epilepsy<br>[0.94]   | Road Inj<br>[0.3]    |
| Belize                      | Iron<br>[1.58]        | Asthma<br>[1.84]     | Neonatal<br>[1.02]   | Dermatitis<br>[1.21] | Road Inj<br>[0.36]   | Drown<br>[0.53]      | Congenital<br>[0.45] | LRI<br>[0.38]        | Vit A<br>[0.48]      | Diarrhea<br>[0.63]   |
| Bermuda                     | Asthma<br>[2.53]      | Dermatitis<br>[1.03] | Neonatal<br>[0.98]   | Congenital<br>[0.56] | Skin Viral<br>[0.79] | Anxiety<br>[0.79]    | Iron<br>[1.57]       | Headaches<br>[1.33]  | Diarrhea<br>[1.71]   | Conduct<br>[0.68]    |
| Cuba                        | Asthma<br>[1.96]      | Dermatitis<br>[1.11] | Neonatal<br>[0.92]   | Iron<br>[1.31]       | Congenital<br>[0.52] | Skin Viral<br>[0.81] | Road Inj<br>[0.27]   | Anxiety<br>[0.91]    | Headaches<br>[1.3]   | Drown<br>[0.42]      |
| Dominica                    | Iron<br>[2.17]        | Asthma<br>[1.91]     | Neonatal<br>[1.1]    | Dermatitis<br>[1.11] | Congenital<br>[0.75] | Road Inj<br>[0.52]   | Drown<br>[0.92]      | Epilepsy<br>[1.31]   | Leukemia<br>[0.82]   | Vit A<br>[0.78]      |
| Dominican Rep               | Iron<br>[1.37]        | Road Inj<br>[0.6]    | Asthma<br>[1.36]     | Neonatal<br>[1.03]   | Dermatitis<br>[1.21] | Congenital<br>[0.62] | Diarrhea<br>[0.97]   | Vit A<br>[0.61]      | LRI<br>[0.45]        | Violence<br>[1.7]    |
| Grenada                     | Asthma<br>[1.58]      | Neonatal<br>[1.06]   | Dermatitis<br>[1.15] | Iron<br>[0.96]       | Drown<br>[0.72]      | Vit A<br>[0.96]      | Congenital<br>[0.54] | LRI<br>[0.62]        | Diarrhea<br>[1.12]   | Road Inj<br>[0.25]   |
| Guyana                      | Iron<br>[1.41]        | Asthma<br>[1.7]      | Neonatal<br>[1.1]    | Dermatitis<br>[1.22] | Drown<br>[0.63]      | Road Inj<br>[0.35]   | Congenital<br>[0.51] | Vit A<br>[0.69]      | LRI<br>[0.47]        | Diarrhea<br>[0.77]   |
| Haiti                       | Road Inj<br>[1.13]    | Iron<br>[1.22]       | Asthma<br>[1.74]     | Drown<br>[0.75]      | Vit A<br>[0.74]      | Congenital<br>[0.75] | LRI<br>[0.38]        | Dermatitis<br>[1.2]  | HIV<br>[6.94]        | Neonatal<br>[1.08]   |
| Jamaica                     | Asthma<br>[1.96]      | Neonatal<br>[1.02]   | Dermatitis<br>[1.12] | Congenital<br>[0.62] | Iron<br>[0.99]       | Vit A<br>[0.89]      | Road Inj<br>[0.3]    | Epilepsy<br>[0.98]   | Skin Viral<br>[0.81] | Anxiety<br>[0.93]    |
| Puerto Rico                 | Disaster<br>[6687.47] | Asthma<br>[3.09]     | Neonatal<br>[1.04]   | Dermatitis<br>[1.03] | Congenital<br>[0.6]  | Iron<br>[2.02]       | Vit A<br>[1.84]      | Skin Viral<br>[0.79] | Anxiety<br>[0.78]    | Headaches<br>[1.32]  |
| St Lucia                    | Asthma<br>[1.87]      | Neonatal<br>[1.08]   | Dermatitis<br>[1.14] | Iron<br>[0.88]       | Congenital<br>[0.48] | Drown<br>[0.52]      | Road Inj<br>[0.3]    | Diarrhea<br>[1.13]   | Vit A<br>[0.61]      | Epilepsy<br>[0.86]   |
| St Vincent                  | Iron<br>[1.79]        | Asthma<br>[1.75]     | Neonatal<br>[1.03]   | Dermatitis<br>[1.19] | Drown<br>[0.63]      | Congenital<br>[0.53] | Vit A<br>[0.67]      | Epilepsy<br>[0.84]   | Diarrhea<br>[0.7]    | Road Inj<br>[0.21]   |
| Suriname                    | Asthma<br>[1.91]      | Iron<br>[1.55]       | Neonatal<br>[1.02]   | Dermatitis<br>[1.15] | Road Inj<br>[0.4]    | Congenital<br>[0.53] | Vit A<br>[0.84]      | Drown<br>[0.52]      | Diarrhea<br>[1.09]   | Epilepsy<br>[0.93]   |
| Trinidad Tobago             | Asthma<br>[2.14]      | Neonatal<br>[1.04]   | Dermatitis<br>[1.1]  | Road Inj<br>[0.54]   | Congenital<br>[0.68] | Leukemia<br>[0.67]   | Skin Viral<br>[0.8]  | Anxiety<br>[0.9]     | Epilepsy<br>[0.92]   | Headaches<br>[1.3]   |
| Virgin Isl US               | Asthma<br>[2.26]      | Neonatal<br>[1.0]    | Dermatitis<br>[1.03] | Congenital<br>[0.74] | Disaster<br>[480.83] | Iron<br>[2.2]        | Diarrhea<br>[2.11]   | Road Inj<br>[0.54]   | Drown<br>[1.23]      | Skin Viral<br>[0.79] |
| Central Latin America       | Neonatal<br>[1.37]    | Congenital<br>[0.57] | Diarrhea<br>[1.39]   | Asthma<br>[0.88]     | Road Inj<br>[0.37]   | Dermatitis<br>[0.81] | Epilepsy<br>[1.21]   | Vit A<br>[0.69]      | Leukemia<br>[0.75]   | Violence<br>[1.72]   |
| Colombia                    | Neonatal<br>[1.37]    | Dermatitis<br>[0.89] | Asthma<br>[0.89]     | Diarrhea<br>[1.36]   | Road Inj<br>[0.34]   | Congenital<br>[0.47] | Epilepsy<br>[1.22]   | Leukemia<br>[0.76]   | Drown<br>[0.36]      | Skin Viral<br>[0.83] |
| Costa Rica                  | Neonatal<br>[1.27]    | Asthma<br>[1.28]     | Dermatitis<br>[0.83] | Diarrhea<br>[1.65]   | Congenital<br>[0.5]  | Road Inj<br>[0.32]   | Epilepsy<br>[1.07]   | Skin Viral<br>[0.82] | Conduct<br>[0.81]    | Vit A<br>[0.48]      |
| El Salvador                 | Neonatal<br>[1.39]    | Iron<br>[1.16]       | Vit A<br>[1.07]      | Asthma<br>[1.11]     | Diarrhea<br>[1.14]   | Congenital<br>[0.53] | Road Inj<br>[0.34]   | Dermatitis<br>[0.82] | Epilepsy<br>[0.93]   | LRI<br>[0.36]        |

**eFigure 7d. Leading ten causes of DALYs with the ratio of observed DALYs to DALYs expected on the basis of Socio-Demographic Index alone in 2017, 5-9 years, both sexes combined.** The top ten causes contributing to DALYs are listed globally, by socio-demographic quintile, and then by GBD superregion, region, country, and subnationally where modeled. For each cell, the ratio of observed DALYs to DALYs expected on the basis of socio-demographic index (SDI) alone are listed. Abbreviations: DALY=disability-adjusted life year, GBD=Global Burden of Disease.

Values shown in brackets represent the ratio of observed DALYs to predicted DALYs on the basis of Socio-Demographic Index (SDI), rounded to two (2) digits. Color ranges (shown below) were calculated to place a roughly equal number of cells into each bin.

| COLOR KEY:      |                    | [0.0-0.62]           | [0.62-0.79]          | [0.79-0.89]          | [0.89-0.97]          | [0.97-1.07]          | [1.07-1.26]          | [1.26-1.44]          | [1.44-2.32]          | 2.32+                |
|-----------------|--------------------|----------------------|----------------------|----------------------|----------------------|----------------------|----------------------|----------------------|----------------------|----------------------|
|                 | 1                  | 2                    | 3                    | 4                    | 5                    | 6                    | 7                    | 8                    | 9                    | 10                   |
| Guatemala       | Diarrhea<br>[1.41] | LRI<br>[0.85]        | Neonatal<br>[1.46]   | Iron<br>[0.71]       | Dermatitis<br>[1.07] | Congenital<br>[0.45] | Asthma<br>[0.73]     | Road Inj<br>[0.22]   | Epilepsy<br>[0.86]   | Vit A<br>[0.39]      |
| Honduras        | Diarrhea<br>[1.12] | Iron<br>[0.88]       | Neonatal<br>[1.58]   | Violence<br>[2.95]   | Asthma<br>[1.14]     | Road Inj<br>[0.34]   | Dermatitis<br>[1.06] | Vit A<br>[0.6]       | Leukemia<br>[0.87]   | Epilepsy<br>[1.11]   |
| Mexico          | Neonatal<br>[1.38] | Congenital<br>[0.63] | Road Inj<br>[0.39]   | Vit A<br>[0.83]      | Asthma<br>[0.81]     | Epilepsy<br>[1.32]   | Leukemia<br>[0.82]   | Dermatitis<br>[0.66] | Violence<br>[1.94]   | Conduct<br>[0.87]    |
| Aguascalientes  | Neonatal<br>[1.36] | Asthma<br>[0.91]     | Congenital<br>[0.55] | Epilepsy<br>[1.34]   | Dermatitis<br>[0.65] | Road Inj<br>[0.32]   | Vit A<br>[0.68]      | Leukemia<br>[0.62]   | Conduct<br>[0.87]    | Skin Viral<br>[0.81] |
| Baja CA         | Neonatal<br>[1.34] | Vit A<br>[1.1]       | Congenital<br>[0.52] | Asthma<br>[0.78]     | Epilepsy<br>[1.25]   | Dermatitis<br>[0.65] | Road Inj<br>[0.28]   | Violence<br>[1.9]    | Leukemia<br>[0.62]   | Conduct<br>[0.87]    |
| Baja CA Sur     | Neonatal<br>[1.42] | Road Inj<br>[0.52]   | Congenital<br>[0.66] | Vit A<br>[1.09]      | Asthma<br>[0.88]     | Epilepsy<br>[1.33]   | Dermatitis<br>[0.65] | Leukemia<br>[0.8]    | Violence<br>[1.81]   | Conduct<br>[0.87]    |
| Campeche        | Neonatal<br>[1.51] | Vit A<br>[0.97]      | Congenital<br>[0.55] | Asthma<br>[0.8]      | Road Inj<br>[0.32]   | Epilepsy<br>[1.16]   | Dermatitis<br>[0.68] | Leukemia<br>[0.75]   | Iron<br>[0.51]       | Violence<br>[1.49]   |
| Chiapas         | Neonatal<br>[1.45] | Leukemia<br>[1.25]   | Congenital<br>[0.65] | Diarrhea<br>[0.73]   | Epilepsy<br>[1.34]   | Vit A<br>[0.62]      | Road Inj<br>[0.28]   | Asthma<br>[0.75]     | LRI<br>[0.31]        | Dermatitis<br>[0.7]  |
| Chihuahua       | Neonatal<br>[1.27] | Road Inj<br>[0.48]   | Congenital<br>[0.62] | Asthma<br>[0.92]     | Epilepsy<br>[1.32]   | Violence<br>[2.52]   | Leukemia<br>[0.7]    | Dermatitis<br>[0.56] | Vit A<br>[0.61]      | Conduct<br>[0.87]    |
| Coahuila        | Neonatal<br>[1.16] | Road Inj<br>[0.42]   | Congenital<br>[0.58] | Asthma<br>[0.91]     | Epilepsy<br>[1.31]   | Dermatitis<br>[0.66] | Vit A<br>[0.72]      | Leukemia<br>[0.74]   | Diarrhea<br>[1.01]   | Iron<br>[0.5]        |
| Colima          | Neonatal<br>[1.45] | Road Inj<br>[0.51]   | Congenital<br>[0.65] | Vit A<br>[0.98]      | Asthma<br>[0.85]     | Epilepsy<br>[1.37]   | Dermatitis<br>[0.65] | Violence<br>[2.35]   | Leukemia<br>[0.72]   | Conduct<br>[0.87]    |
| Mexico City     | Neonatal<br>[1.45] | Congenital<br>[0.84] | Dermatitis<br>[0.81] | Epilepsy<br>[1.69]   | Leukemia<br>[0.82]   | Asthma<br>[0.82]     | Road Inj<br>[0.42]   | Violence<br>[2.88]   | Vit A<br>[0.77]      | Skin Viral<br>[0.8]  |
| Durango         | Neonatal<br>[1.22] | Dermatitis<br>[0.88] | Asthma<br>[0.89]     | Road Inj<br>[0.34]   | Vit A<br>[0.79]      | Congenital<br>[0.48] | Epilepsy<br>[1.19]   | Violence<br>[1.77]   | Conduct<br>[0.87]    | Skin Viral<br>[0.83] |
| Guanajuato      | Neonatal<br>[1.25] | Road Inj<br>[0.43]   | Vit A<br>[1.01]      | Congenital<br>[0.59] | Asthma<br>[0.86]     | Epilepsy<br>[1.3]    | Dermatitis<br>[0.68] | Leukemia<br>[0.76]   | Conduct<br>[0.88]    | Violence<br>[1.47]   |
| Guerrero        | Neonatal<br>[1.49] | Violence<br>[3.09]   | Road Inj<br>[0.43]   | Congenital<br>[0.62] | Vit A<br>[0.67]      | Asthma<br>[0.77]     | Epilepsy<br>[1.13]   | Leukemia<br>[0.77]   | Dermatitis<br>[0.71] | Diarrhea<br>[0.48]   |
| Hidalgo         | Neonatal<br>[1.72] | Congenital<br>[0.59] | Road Inj<br>[0.36]   | Epilepsy<br>[1.31]   | Asthma<br>[0.82]     | Leukemia<br>[0.76]   | Vit A<br>[0.6]       | Dermatitis<br>[0.7]  | Violence<br>[1.44]   | Conduct<br>[0.9]     |
| Jalisco         | Neonatal<br>[1.31] | Road Inj<br>[0.54]   | Congenital<br>[0.69] | Epilepsy<br>[1.53]   | Leukemia<br>[0.98]   | Asthma<br>[0.77]     | Vit A<br>[0.8]       | Dermatitis<br>[0.66] | Violence<br>[1.88]   | Conduct<br>[0.87]    |
| Mexico          | Neonatal<br>[1.63] | Congenital<br>[0.57] | Epilepsy<br>[1.27]   | Vit A<br>[0.79]      | Asthma<br>[0.75]     | Road Inj<br>[0.31]   | Violence<br>[2.04]   | Leukemia<br>[0.7]    | Dermatitis<br>[0.57] | Conduct<br>[0.87]    |
| Michoacan       | Neonatal<br>[1.2]  | Road Inj<br>[0.47]   | Congenital<br>[0.61] | Vit A<br>[0.74]      | Asthma<br>[0.83]     | Leukemia<br>[0.8]    | Epilepsy<br>[1.15]   | Violence<br>[1.95]   | Dermatitis<br>[0.7]  | Conduct<br>[0.9]     |
| Morelos         | Neonatal<br>[1.34] | Congenital<br>[0.67] | Vit A<br>[0.85]      | Epilepsy<br>[1.32]   | Asthma<br>[0.77]     | Road Inj<br>[0.33]   | Violence<br>[2.19]   | Leukemia<br>[0.77]   | Dermatitis<br>[0.57] | Disaster<br>[118.29] |
| Nayarit         | Neonatal<br>[1.47] | Road Inj<br>[0.62]   | Congenital<br>[0.66] | Vit A<br>[0.95]      | Asthma<br>[0.83]     | Epilepsy<br>[1.27]   | Violence<br>[2.21]   | Leukemia<br>[0.8]    | Dermatitis<br>[0.67] | Conduct<br>[0.88]    |
| Nuevo Leon      | Neonatal<br>[1.1]  | Vit A<br>[1.34]      | Congenital<br>[0.63] | Asthma<br>[0.79]     | Epilepsy<br>[1.36]   | Road Inj<br>[0.32]   | Dermatitis<br>[0.55] | Leukemia<br>[0.77]   | Violence<br>[1.92]   | Conduct<br>[0.86]    |
| Oaxaca          | Neonatal<br>[1.42] | Congenital<br>[0.74] | Road Inj<br>[0.36]   | Epilepsy<br>[1.38]   | Leukemia<br>[0.93]   | Violence<br>[2.25]   | Asthma<br>[0.78]     | Diarrhea<br>[0.66]   | Dermatitis<br>[0.71] | Vit A<br>[0.51]      |
| Puebla          | Neonatal<br>[1.32] | Congenital<br>[0.71] | Road Inj<br>[0.4]    | Leukemia<br>[1.01]   | Asthma<br>[0.82]     | Vit A<br>[0.61]      | Dermatitis<br>[0.7]  | Epilepsy<br>[1.05]   | Violence<br>[1.56]   | Disaster<br>[74.38]  |
| Queretaro       | Neonatal<br>[1.44] | Road Inj<br>[0.49]   | Congenital<br>[0.68] | Asthma<br>[0.88]     | Epilepsy<br>[1.35]   | Dermatitis<br>[0.66] | Leukemia<br>[0.77]   | Vit A<br>[0.62]      | Conduct<br>[0.87]    | Violence<br>[1.59]   |
| Quintana Roo    | Neonatal<br>[1.73] | Vit A<br>[1.11]      | Congenital<br>[0.64] | Road Inj<br>[0.4]    | Asthma<br>[0.81]     | Iron<br>[0.67]       | Epilepsy<br>[1.26]   | Leukemia<br>[0.81]   | Dermatitis<br>[0.67] | Diarrhea<br>[0.96]   |
| San Luis Potosi | Neonatal<br>[1.19] | Congenital<br>[0.62] | Road Inj<br>[0.37]   | Asthma<br>[0.85]     | Epilepsy<br>[1.35]   | Vit A<br>[0.83]      | Dermatitis<br>[0.68] | Leukemia<br>[0.65]   | Violence<br>[1.6]    | Conduct<br>[0.88]    |
| Sinaloa         | Neonatal<br>[1.24] | Road Inj<br>[0.53]   | Vit A<br>[1.05]      | Congenital<br>[0.59] | Asthma<br>[0.85]     | Epilepsy<br>[1.29]   | Dermatitis<br>[0.66] | Violence<br>[2.28]   | Leukemia<br>[0.64]   | Iron<br>[0.48]       |
| Sonora          | Neonatal<br>[1.21] | Road Inj<br>[0.56]   | Congenital<br>[0.65] | Asthma<br>[0.89]     | Vit A<br>[0.97]      | Epilepsy<br>[1.39]   | Leukemia<br>[0.91]   | Dermatitis<br>[0.66] | Violence<br>[2.01]   | Iron<br>[0.51]       |
| Tabasco         | Neonatal<br>[1.49] | Road Inj<br>[0.48]   | Congenital<br>[0.69] | Vit A<br>[1.04]      | Leukemia<br>[0.77]   | Leukemia<br>[0.98]   | Epilepsy<br>[1.26]   | Asthma<br>[0.75]     | Dermatitis<br>[0.67] | Diarrhea<br>[0.78]   |
| Tamaulipas      | Neonatal<br>[1.52] | Congenital<br>[0.59] | Road Inj<br>[0.41]   | Asthma<br>[0.84]     | Vit A<br>[0.88]      | Epilepsy<br>[1.24]   | Violence<br>[2.0]    | Dermatitis<br>[0.55] | Leukemia<br>[0.67]   | Diarrhea<br>[0.92]   |

**eFigure 7d. Leading ten causes of DALYs with the ratio of observed DALYs to DALYs expected on the basis of Socio-Demographic Index alone in 2017, 5-9 years, both sexes combined.** The top ten causes contributing to DALYs are listed globally, by socio-demographic quintile, and then by GBD superregion, region, country, and subnationally where modeled. For each cell, the ratio of observed DALYs to DALYs expected on the basis of socio-demographic index (SDI) alone are listed. Abbreviations: DALY=disability-adjusted life year, GBD=Global Burden of Disease.

Values shown in brackets represent the ratio of observed DALYs to predicted DALYs on the basis of Socio-Demographic Index (SDI), rounded to two (2) digits. Color ranges (shown below) were calculated to place a roughly equal number of cells into each bin.

| COLOR KEY:                    |                    | [0.0-0.62]           | [0.62-0.79]          | [0.79-0.89]          | [0.89-0.97]          | [0.97-1.07]          | [1.07-1.26]          | [1.26-1.44]          | [1.44-2.32]          | 2.32+                |
|-------------------------------|--------------------|----------------------|----------------------|----------------------|----------------------|----------------------|----------------------|----------------------|----------------------|----------------------|
|                               | 1                  | 2                    | 3                    | 4                    | 5                    | 6                    | 7                    | 8                    | 9                    | 10                   |
| Tlaxcala                      | Neonatal<br>[1.48] | Congenital<br>[0.58] | Asthma<br>[0.84]     | Road Inj<br>[0.34]   | Vit A<br>[0.77]      | Epilepsy<br>[1.28]   | Dermatitis<br>[0.69] | Leukemia<br>[0.73]   | Conduct<br>[0.88]    | Violence<br>[1.37]   |
| Veracruz                      | Neonatal<br>[1.48] | Congenital<br>[0.58] | Vit A<br>[0.74]      | Epilepsy<br>[1.23]   | Asthma<br>[0.78]     | Dermatitis<br>[0.7]  | Leukemia<br>[0.66]   | Violence<br>[1.48]   | Road Inj<br>[0.19]   | Conduct<br>[0.89]    |
| Yucatan                       | Neonatal<br>[1.27] | Congenital<br>[0.61] | Asthma<br>[0.78]     | Epilepsy<br>[1.28]   | Vit A<br>[0.77]      | Leukemia<br>[0.77]   | Dermatitis<br>[0.63] | Road Inj<br>[0.26]   | Iron<br>[0.51]       | Conduct<br>[0.87]    |
| Zacatecas                     | Road Inj<br>[0.61] | Neonatal<br>[0.95]   | Congenital<br>[0.56] | Asthma<br>[0.87]     | Epilepsy<br>[1.33]   | Vit A<br>[0.71]      | Dermatitis<br>[0.68] | Leukemia<br>[0.62]   | Violence<br>[1.61]   | Conduct<br>[0.88]    |
| Nicaragua                     | Neonatal<br>[1.47] | Diarrhea<br>[0.78]   | Dermatitis<br>[1.07] | Asthma<br>[0.83]     | Congenital<br>[0.42] | Epilepsy<br>[0.85]   | Road Inj<br>[0.18]   | Leukemia<br>[0.5]    | Iron<br>[0.26]       | Skin Viral<br>[0.87] |
| Panama                        | Neonatal<br>[1.25] | Diarrhea<br>[2.99]   | Asthma<br>[1.27]     | Dermatitis<br>[1.1]  | Iron<br>[1.17]       | Congenital<br>[0.61] | Road Inj<br>[0.35]   | Vit A<br>[0.71]      | Epilepsy<br>[0.99]   | LRI<br>[0.71]        |
| Venezuela                     | Neonatal<br>[1.36] | Diarrhea<br>[2.8]    | Road Inj<br>[0.49]   | Dermatitis<br>[0.95] | Congenital<br>[0.63] | Asthma<br>[0.97]     | Epilepsy<br>[1.14]   | Leukemia<br>[0.69]   | Vit A<br>[0.62]      | LRI<br>[0.53]        |
| <b>Tropical Latin America</b> | Asthma<br>[1.6]    | Vit A<br>[1.38]      | Neonatal<br>[0.91]   | Congenital<br>[0.66] | Road Inj<br>[0.44]   | Dermatitis<br>[0.77] | Iron<br>[0.74]       | Headaches<br>[1.67]  | Diarrhea<br>[1.08]   | Anxiety<br>[1.06]    |
| Brazil                        | Asthma<br>[1.6]    | Vit A<br>[1.42]      | Neonatal<br>[0.92]   | Congenital<br>[0.67] | Road Inj<br>[0.46]   | Dermatitis<br>[0.75] | Iron<br>[0.75]       | Headaches<br>[1.66]  | Diarrhea<br>[1.07]   | Anxiety<br>[1.05]    |
| Acre                          | Iron<br>[1.07]     | Asthma<br>[1.37]     | Neonatal<br>[0.99]   | Vit A<br>[1.07]      | Congenital<br>[0.69] | Road Inj<br>[0.42]   | LRI<br>[0.56]        | Dermatitis<br>[0.8]  | Drown<br>[0.46]      | Diarrhea<br>[0.95]   |
| Alagoas                       | Vit A<br>[1.22]    | Asthma<br>[1.23]     | Road Inj<br>[0.42]   | Neonatal<br>[0.85]   | Congenital<br>[0.54] | Diarrhea<br>[0.61]   | LRI<br>[0.35]        | Dermatitis<br>[0.68] | Iron<br>[0.36]       | Drown<br>[0.31]      |
| Amapa                         | Drown<br>[1.25]    | Asthma<br>[1.52]     | Neonatal<br>[0.96]   | Road Inj<br>[0.54]   | Congenital<br>[0.73] | Iron<br>[1.0]        | Vit A<br>[1.04]      | LRI<br>[0.99]        | Dermatitis<br>[0.76] | Headaches<br>[1.67]  |
| Amazonas                      | Asthma<br>[1.47]   | Vit A<br>[1.33]      | Iron<br>[1.1]        | Congenital<br>[0.69] | Neonatal<br>[0.82]   | Drown<br>[0.7]       | Road Inj<br>[0.36]   | Dermatitis<br>[0.78] | LRI<br>[0.59]        | Headaches<br>[1.68]  |
| Bahia                         | Vit A<br>[1.46]    | Asthma<br>[1.31]     | Iron<br>[0.82]       | Neonatal<br>[0.91]   | Dermatitis<br>[1.09] | Congenital<br>[0.56] | Road Inj<br>[0.36]   | Diarrhea<br>[0.87]   | Drown<br>[0.42]      | LRI<br>[0.36]        |
| Ceara                         | Vit A<br>[1.51]    | Asthma<br>[1.39]     | Neonatal<br>[0.86]   | Road Inj<br>[0.41]   | Congenital<br>[0.59] | Dermatitis<br>[0.81] | Diarrhea<br>[0.85]   | Drown<br>[0.34]      | Headaches<br>[1.7]   | LRI<br>[0.37]        |
| Distrito Federal              | Asthma<br>[1.95]   | Neonatal<br>[1.01]   | Road Inj<br>[1.1]    | Congenital<br>[1.06] | Dermatitis<br>[0.69] | Vit A<br>[1.85]      | Headaches<br>[1.68]  | Anxiety<br>[0.9]     | Skin Viral<br>[0.79] | Brain C<br>[1.11]    |
| Espirito Santo                | Asthma<br>[1.86]   | Vit A<br>[2.01]      | Neonatal<br>[0.9]    | Congenital<br>[0.78] | Road Inj<br>[0.52]   | Iron<br>[1.0]        | Dermatitis<br>[0.75] | Drown<br>[0.53]      | Headaches<br>[1.66]  | Anxiety<br>[1.04]    |
| Goias                         | Asthma<br>[1.62]   | Road Inj<br>[0.58]   | Neonatal<br>[0.83]   | Vit A<br>[1.16]      | Congenital<br>[0.65] | Dermatitis<br>[0.77] | Iron<br>[0.66]       | Headaches<br>[1.68]  | Anxiety<br>[1.07]    | Diarrhea<br>[0.95]   |
| Maranhao                      | Vit A<br>[1.09]    | Asthma<br>[1.16]     | Iron<br>[0.55]       | Road Inj<br>[0.35]   | Neonatal<br>[0.95]   | Congenital<br>[0.54] | Dermatitis<br>[0.81] | Diarrhea<br>[0.37]   | LRI<br>[0.22]        | Drown<br>[0.26]      |
| Mato Grosso                   | Asthma<br>[1.71]   | Road Inj<br>[0.59]   | Vit A<br>[1.35]      | Neonatal<br>[0.87]   | Congenital<br>[0.63] | Dermatitis<br>[0.76] | Headaches<br>[1.67]  | Drown<br>[0.48]      | Diarrhea<br>[1.07]   | Anxiety<br>[1.06]    |
| Mato Grosso do Sul            | Asthma<br>[1.56]   | Neonatal<br>[1.0]    | Road Inj<br>[0.5]    | Congenital<br>[0.67] | Vit A<br>[0.98]      | Dermatitis<br>[0.77] | Headaches<br>[1.68]  | Diarrhea<br>[1.04]   | Anxiety<br>[1.07]    | LRI<br>[0.51]        |
| Minas Gerais                  | Asthma<br>[1.69]   | Neonatal<br>[0.96]   | Vit A<br>[1.31]      | Congenital<br>[0.64] | Road Inj<br>[0.45]   | Dermatitis<br>[0.65] | Headaches<br>[1.66]  | Diarrhea<br>[1.08]   | Iron<br>[0.55]       | Anxiety<br>[1.06]    |
| Para                          | Asthma<br>[1.38]   | Vit A<br>[0.99]      | Iron<br>[0.79]       | Neonatal<br>[0.88]   | Congenital<br>[0.55] | Diarrhea<br>[0.97]   | Road Inj<br>[0.33]   | Dermatitis<br>[0.83] | Drown<br>[0.45]      | LRI<br>[0.47]        |
| Paraiba                       | Vit A<br>[1.52]    | Asthma<br>[1.3]      | Road Inj<br>[0.42]   | Congenital<br>[0.61] | Neonatal<br>[0.82]   | Diarrhea<br>[0.86]   | Dermatitis<br>[0.82] | LRI<br>[0.36]        | Drown<br>[0.34]      | Headaches<br>[1.74]  |
| Parana                        | Asthma<br>[1.83]   | Neonatal<br>[0.94]   | Congenital<br>[0.72] | Road Inj<br>[0.53]   | Vit A<br>[1.18]      | Dermatitis<br>[0.67] | Headaches<br>[1.67]  | Anxiety<br>[1.03]    | Diarrhea<br>[1.1]    | Skin Viral<br>[0.8]  |
| Pernambuco                    | Vit A<br>[1.4]     | Asthma<br>[1.43]     | Iron<br>[1.05]       | Congenital<br>[0.67] | Neonatal<br>[0.86]   | Road Inj<br>[0.37]   | Dermatitis<br>[0.79] | LRI<br>[0.38]        | Headaches<br>[1.69]  | Diarrhea<br>[0.68]   |
| Piaui                         | Asthma<br>[1.31]   | Road Inj<br>[0.46]   | Vit A<br>[0.83]      | Congenital<br>[0.65] | Neonatal<br>[0.98]   | Dermatitis<br>[0.83] | Diarrhea<br>[0.61]   | Drown<br>[0.35]      | LRI<br>[0.31]        | Headaches<br>[1.78]  |
| Rio de Janeiro                | Asthma<br>[1.68]   | Neonatal<br>[1.14]   | Congenital<br>[0.7]  | Dermatitis<br>[0.73] | Road Inj<br>[0.38]   | Headaches<br>[1.67]  | Vit A<br>[0.84]      | LRI<br>[1.03]        | Anxiety<br>[0.99]    | Skin Viral<br>[0.79] |
| Rio Grande do Norte           | Asthma<br>[1.39]   | Vit A<br>[1.12]      | Neonatal<br>[0.79]   | Iron<br>[0.69]       | Congenital<br>[0.54] | Dermatitis<br>[0.8]  | Diarrhea<br>[0.98]   | Road Inj<br>[0.29]   | Headaches<br>[1.69]  | LRI<br>[0.4]         |
| Rio Grande do Sul             | Asthma<br>[1.88]   | Congenital<br>[1.01] | Neonatal<br>[0.96]   | Dermatitis<br>[0.98] | Epilepsy<br>[1.58]   | Vit A<br>[1.01]      | Road Inj<br>[0.38]   | Back Pain<br>[3.24]  | Headaches<br>[1.71]  | Anxiety<br>[1.01]    |
| Rondonia                      | Asthma<br>[1.44]   | Congenital<br>[0.83] | Neonatal<br>[1.01]   | Road Inj<br>[0.53]   | Vit A<br>[1.09]      | Iron<br>[0.71]       | Dermatitis<br>[0.79] | Drown<br>[0.47]      | Headaches<br>[1.68]  | LRI<br>[0.45]        |

**eFigure 7d. Leading ten causes of DALYs with the ratio of observed DALYs to DALYs expected on the basis of Socio-Demographic Index alone in 2017, 5-9 years, both sexes combined.** The top ten causes contributing to DALYs are listed globally, by socio-demographic quintile, and then by GBD superregion, region, country, and subnationally where modeled. For each cell, the ratio of observed DALYs to DALYs expected on the basis of socio-demographic index (SDI) alone are listed. Abbreviations: DALY=disability-adjusted life year, GBD=Global Burden of Disease.

Values shown in brackets represent the ratio of observed DALYs to predicted DALYs on the basis of Socio-Demographic Index (SDI), rounded to two (2) digits. Color ranges (shown below) were calculated to place a roughly equal number of cells into each bin.

| COLOR KEY:                   |                                  | [0.0-0.62]           | [0.62-0.79]          | [0.79-0.89]          | [0.89-0.97]                     | [0.97-1.07]          | [1.07-1.26]          | [1.26-1.44]         | [1.44-2.32]                   | 2.32+                |
|------------------------------|----------------------------------|----------------------|----------------------|----------------------|---------------------------------|----------------------|----------------------|---------------------|-------------------------------|----------------------|
|                              | 1                                | 2                    | 3                    | 4                    | 5                               | 6                    | 7                    | 8                   | 9                             | 10                   |
| Roraima                      | Road Inj<br>[0.77]               | Asthma<br>[1.48]     | Neonatal<br>[1.01]   | Vit A<br>[1.38]      | Congenital<br>[0.78]            | Drown<br>[0.74]      | Iron<br>[0.83]       | LRI<br>[0.88]       | Dermatitis<br>[0.77]          | Headaches<br>[1.67]  |
| Santa Catarina               | Asthma<br>[1.99]                 | Road Inj<br>[0.76]   | Vit A<br>[1.63]      | Congenital<br>[0.79] | Neonatal<br>[0.86]              | Iron<br>[1.1]        | Dermatitis<br>[0.74] | Headaches<br>[2.07] | Anxiety<br>[1.01]             | Skin Viral<br>[0.79] |
| Sao Paulo                    | Asthma<br>[1.84]                 | Neonatal<br>[0.98]   | Vit A<br>[1.26]      | Congenital<br>[0.62] | Dermatitis<br>[0.63]            | Road Inj<br>[0.37]   | Headaches<br>[1.6]   | Anxiety<br>[0.97]   | Iron<br>[0.74]                | Skin Viral<br>[0.79] |
| Sergipe                      | Vit A<br>[1.59]                  | Asthma<br>[1.51]     | Neonatal<br>[1.0]    | Road Inj<br>[0.45]   | Congenital<br>[0.57]            | Iron<br>[0.59]       | Dermatitis<br>[0.66] | Headaches<br>[1.69] | Drown<br>[0.35]               | Anxiety<br>[1.13]    |
| Tocantins                    | Road Inj<br>[0.77]               | Asthma<br>[1.42]     | Neonatal<br>[0.98]   | Vit A<br>[1.09]      | Congenital<br>[0.68]            | Leish<br>[223.65]    | Dermatitis<br>[0.8]  | Drown<br>[0.49]     | Iron<br>[0.5]                 | Headaches<br>[1.69]  |
| Paraguay                     | Asthma<br>[1.62]                 | Dermatitis<br>[1.05] | Iron<br>[0.82]       | Neonatal<br>[0.78]   | Diarrhea<br>[1.46]              | Congenital<br>[0.58] | Vit A<br>[0.89]      | Road Inj<br>[0.32]  | Headaches<br>[1.72]           | Anxiety<br>[1.14]    |
| North Africa and Middle East | Conflict<br>Terror<br>[1335.19]  | Road Inj<br>[1.08]   | Iron<br>[1.81]       | Congenital<br>[0.92] | Neonatal<br>[0.96]              | Asthma<br>[1.0]      | Vit A<br>[1.04]      | LRI<br>[0.92]       | Diarrhea<br>[1.44]            | Dermatitis<br>[0.7]  |
| Afghanistan                  | LRI<br>[0.47]                    | Road Inj<br>[0.49]   | Meningitis<br>[0.6]  | Congenital<br>[0.79] | Vit A<br>[0.47]                 | Measles<br>[0.25]    | Drown<br>[0.44]      | Iron<br>[0.38]      | Falls<br>[1.78]               | Asthma<br>[1.04]     |
| Algeria                      | Road Inj<br>[1.41]               | Congenital<br>[1.19] | Neonatal<br>[1.07]   | Asthma<br>[1.13]     | Iron<br>[1.1]                   | Dermatitis<br>[0.68] | Vit A<br>[0.98]      | Conduct<br>[1.07]   | Epilepsy<br>[1.11]            | LRI<br>[0.89]        |
| Bahrain                      | Neonatal<br>[1.03]               | Road Inj<br>[0.77]   | Dermatitis<br>[0.9]  | Asthma<br>[1.06]     | Congenital<br>[0.63]            | Diarrhea<br>[1.71]   | Conduct<br>[1.06]    | Hemog<br>[3.44]     | Vit A<br>[0.8]                | Epilepsy<br>[1.07]   |
| Egypt                        | Road Inj<br>[1.06]               | LRI<br>[1.29]        | Iron<br>[1.38]       | Congenital<br>[0.89] | Neonatal<br>[1.04]              | Asthma<br>[1.2]      | Diarrhea<br>[1.06]   | Conduct<br>[1.1]    | Dermatitis<br>[0.57]          | Epilepsy<br>[0.88]   |
| Iran                         | Road Inj<br>[1.73]               | Neonatal<br>[1.24]   | Congenital<br>[1.04] | Iron<br>[1.1]        | Asthma<br>[0.85]                | Diarrhea<br>[1.83]   | Anxiety<br>[1.26]    | Conduct<br>[1.12]   | Epilepsy<br>[1.21]            | Dermatitis<br>[0.54] |
| Iraq                         | Conflict<br>Terror<br>[3235.72]  | Iron<br>[1.59]       | Road Inj<br>[0.73]   | Congenital<br>[1.07] | Neonatal<br>[1.12]              | Vit A<br>[0.97]      | Asthma<br>[0.94]     | Mech<br>[2.34]      | Violence<br>[2.21]            | Oth Unint<br>[3.3]   |
| Jordan                       | Neonatal<br>[1.39]               | Road Inj<br>[0.98]   | Congenital<br>[0.97] | Asthma<br>[1.27]     | Iron<br>[1.23]                  | Vit A<br>[1.07]      | Dermatitis<br>[0.68] | Conduct<br>[1.06]   | Diarrhea<br>[1.24]            | Anxiety<br>[0.97]    |
| Kuwait                       | Neonatal<br>[1.16]               | Road Inj<br>[1.03]   | Congenital<br>[1.01] | Asthma<br>[1.28]     | Iron<br>[2.31]                  | Dermatitis<br>[0.67] | Diarrhea<br>[2.22]   | Conduct<br>[1.06]   | Anxiety<br>[0.87]             | Epilepsy<br>[1.17]   |
| Lebanon                      | Neonatal<br>[1.03]               | Asthma<br>[1.4]      | Congenital<br>[0.73] | Dermatitis<br>[0.8]  | Iron<br>[1.26]                  | Diarrhea<br>[1.78]   | Anxiety<br>[1.11]    | Conduct<br>[1.02]   | Conflict<br>Terror<br>[520.3] | Leukemia<br>[0.77]   |
| Libya                        | Conflict<br>Terror<br>[3712.72]  | Road Inj<br>[1.32]   | Congenital<br>[1.3]  | Iron<br>[2.54]       | Neonatal<br>[1.03]              | Dermatitis<br>[0.87] | Diarrhea<br>[3.02]   | Asthma<br>[1.08]    | Leukemia<br>[1.22]            | Conduct<br>[1.06]    |
| Morocco                      | Road Inj<br>[0.93]               | Congenital<br>[1.08] | Iron<br>[1.11]       | Vit A<br>[1.24]      | Neonatal<br>[1.06]              | Dermatitis<br>[0.82] | Asthma<br>[0.76]     | Diarrhea<br>[0.74]  | LRI<br>[0.4]                  | Conduct<br>[1.11]    |
| Palestine                    | Neonatal<br>[1.14]               | Road Inj<br>[0.43]   | Iron<br>[0.58]       | Congenital<br>[0.58] | Asthma<br>[0.93]                | Dermatitis<br>[0.79] | Vit A<br>[0.47]      | Conduct<br>[1.13]   | Epilepsy<br>[0.76]            | Diarrhea<br>[0.4]    |
| Oman                         | Road Inj<br>[1.99]               | Iron<br>[2.35]       | Neonatal<br>[1.07]   | Asthma<br>[0.93]     | Congenital<br>[0.62]            | Diarrhea<br>[2.21]   | Dermatitis<br>[0.6]  | Conduct<br>[1.06]   | Anxiety<br>[0.91]             | Epilepsy<br>[1.08]   |
| Qatar                        | Road Inj<br>[1.24]               | Neonatal<br>[0.97]   | Congenital<br>[0.97] | Dermatitis<br>[0.87] | Asthma<br>[0.93]                | Iron<br>[1.36]       | Conduct<br>[1.06]    | Anxiety<br>[0.89]   | Skin Viral<br>[0.78]          | Epilepsy<br>[1.09]   |
| Saudi Arabia                 | Dermatitis<br>[0.85]             | Congenital<br>[0.85] | Neonatal<br>[0.73]   | Road Inj<br>[0.76]   | Conflict<br>Terror<br>[1131.51] | Asthma<br>[0.84]     | Diarrhea<br>[2.25]   | Conduct<br>[1.07]   | Anxiety<br>[0.88]             | Skin Viral<br>[0.78] |
| Sudan                        | Road Inj<br>[1.18]               | Iron<br>[1.09]       | Congenital<br>[0.92] | Diarrhea<br>[0.61]   | Vit A<br>[0.7]                  | Asthma<br>[0.95]     | Neonatal<br>[0.86]   | LRI<br>[0.29]       | Hemog<br>[1.42]               | Dermatitis<br>[0.72] |
| Syria                        | Conflict<br>Terror<br>[12320.41] | Iron<br>[1.53]       | Neonatal<br>[0.93]   | Congenital<br>[0.59] | Asthma<br>[0.94]                | Road Inj<br>[0.33]   | Vit A<br>[0.7]       | LRI<br>[0.52]       | Conduct<br>[1.08]             | Leukemia<br>[0.62]   |
| Tunisia                      | Road Inj<br>[0.7]                | Neonatal<br>[1.03]   | Congenital<br>[0.61] | Dermatitis<br>[0.79] | Asthma<br>[0.84]                | Mech<br>[2.32]       | Conduct<br>[1.07]    | Diarrhea<br>[1.1]   | Anxiety<br>[1.0]              | Skin Viral<br>[0.79] |
| Turkey                       | Road Inj<br>[0.68]               | Congenital<br>[0.77] | Neonatal<br>[0.75]   | Iron<br>[1.24]       | Asthma<br>[0.9]                 | Vit A<br>[1.24]      | Dermatitis<br>[0.61] | Epilepsy<br>[1.38]  | Conduct<br>[1.04]             | Diarrhea<br>[1.58]   |
| UAE                          | Road Inj<br>[1.51]               | Congenital<br>[1.2]  | Neonatal<br>[1.02]   | Asthma<br>[1.43]     | Iron<br>[3.32]                  | Dermatitis<br>[0.85] | Diarrhea<br>[2.45]   | Conduct<br>[1.02]   | Epilepsy<br>[1.41]            | Anxiety<br>[0.82]    |

**eFigure 7d. Leading ten causes of DALYs with the ratio of observed DALYs to DALYs expected on the basis of Socio-Demographic Index alone in 2017, 5-9 years, both sexes combined.** The top ten causes contributing to DALYs are listed globally, by socio-demographic quintile, and then by GBD superregion, region, country, and subnationally where modeled. For each cell, the ratio of observed DALYs to DALYs expected on the basis of socio-demographic index (SDI) alone are listed. Abbreviations: DALY=disability-adjusted life year, GBD=Global Burden of Disease.

Values shown in brackets represent the ratio of observed DALYs to predicted DALYs on the basis of Socio-Demographic Index (SDI), rounded to two (2) digits. Color ranges (shown below) were calculated to place a roughly equal number of cells into each bin.

| COLOR KEY:        |                               | [0.0-0.62]                      | [0.62-0.79]                    | [0.79-0.89]                    | [0.89-0.97]                   | [0.97-1.07]          | [1.07-1.26]          | [1.26-1.44]          | [1.44-2.32]          | 2.32+                |
|-------------------|-------------------------------|---------------------------------|--------------------------------|--------------------------------|-------------------------------|----------------------|----------------------|----------------------|----------------------|----------------------|
|                   | 1                             | 2                               | 3                              | 4                              | 5                             | 6                    | 7                    | 8                    | 9                    | 10                   |
| Yemen             | Iron<br>[3.47]                | Conflict<br>Terror<br>[682.95]  | Road Inj<br>[1.17]             | Vit A<br>[1.37]                | Diarrhea<br>[0.5]             | Congenital<br>[0.63] | Neonatal<br>[1.29]   | Dermatitis<br>[0.97] | Hemog<br>[1.5]       | Oth NTD<br>[1.51]    |
| South Asia        | Iron<br>[1.96]                | Typh +<br>Paratyph<br>[39.04]   | Vit A<br>[1.56]                | Diarrhea<br>[1.67]             | Neonatal<br>[1.5]             | LRI<br>[0.61]        | Drown<br>[0.64]      | Malaria<br>[88.37]   | Congenital<br>[0.64] | Road Inj<br>[0.32]   |
| Bangladesh        | Typh +<br>Paratyph<br>[14.34] | Drown<br>[1.55]                 | Iron<br>[0.99]                 | Diarrhea<br>[0.62]             | LRI<br>[0.48]                 | Neonatal<br>[1.56]   | Congenital<br>[0.7]  | Vit A<br>[0.48]      | Road Inj<br>[0.28]   | Dermatitis<br>[0.89] |
| Bhutan            | Iron<br>[3.55]                | Vit A<br>[1.46]                 | Neonatal<br>[1.33]             | Diarrhea<br>[1.29]             | Typh +<br>Paratyph<br>[29.07] | Congenital<br>[0.65] | LRI<br>[0.49]        | Dermatitis<br>[0.9]  | Malaria<br>[103.05]  | Encepha<br>[1.98]    |
| India             | Iron<br>[2.09]                | Typh +<br>Paratyph<br>[53.8]    | Vit A<br>[1.89]                | Diarrhea<br>[1.96]             | Neonatal<br>[1.52]            | LRI<br>[0.64]        | Malaria<br>[121.43]  | Congenital<br>[0.6]  | Drown<br>[0.47]      | ID<br>[6.37]         |
| Andhra Pradesh    | Iron<br>[1.62]                | Typh +<br>Paratyph<br>[27.99]   | Vit A<br>[1.51]                | Neonatal<br>[1.69]             | Diarrhea<br>[0.68]            | Congenital<br>[0.44] | ID<br>[5.32]         | Malaria<br>[42.81]   | Dermatitis<br>[0.52] | Skin Viral<br>[0.85] |
| Arunachal Pradesh | Iron<br>[1.78]                | Vit A<br>[1.71]                 | Neonatal<br>[1.59]             | Typh +<br>Paratyph<br>[34.03]  | Malaria<br>[189.29]           | Diarrhea<br>[1.1]    | Congenital<br>[0.47] | LRI<br>[0.38]        | Drown<br>[0.29]      | ID<br>[5.2]          |
| Assam             | Malaria<br>[205.55]           | Iron<br>[1.47]                  | Typh +<br>Paratyph<br>[28.8]   | Diarrhea<br>[1.68]             | Vit A<br>[1.47]               | Neonatal<br>[1.47]   | Drown<br>[0.72]      | LRI<br>[0.6]         | Hep<br>[6.38]        | Congenital<br>[0.59] |
| Bihar             | Diarrhea<br>[1.87]            | Iron<br>[1.46]                  | Vit A<br>[1.35]                | Typh +<br>Paratyph<br>[4.65]   | LRI<br>[0.64]                 | Neonatal<br>[1.79]   | Drown<br>[0.53]      | Encepha<br>[3.38]    | Animal<br>[5.89]     | Congenital<br>[0.52] |
| Chhattisgarh      | Typh +<br>Paratyph<br>[31.78] | Diarrhea<br>[1.81]              | Iron<br>[1.33]                 | Malaria<br>[98.48]             | Drown<br>[0.94]               | LRI<br>[0.77]        | Vit A<br>[1.12]      | Neonatal<br>[1.59]   | Congenital<br>[0.59] | Road Inj<br>[0.3]    |
| Delhi             | Iron<br>[6.17]                | Typh +<br>Paratyph<br>[2464.07] | Vit A<br>[3.26]                | Neonatal<br>[1.46]             | Diarrhea<br>[2.65]            | Congenital<br>[0.65] | LRI<br>[1.53]        | Leukemia<br>[0.86]   | Dengue<br>[94.83]    | Road Inj<br>[0.33]   |
| Goa               | Neonatal<br>[1.8]             | Vit A<br>[3.35]                 | Congenital<br>[0.88]           | Diarrhea<br>[2.45]             | Drown<br>[1.17]               | LRI<br>[1.75]        | Epilepsy<br>[1.25]   | Dermatitis<br>[0.46] | Road Inj<br>[0.34]   | Skin Viral<br>[0.79] |
| Gujarat           | Iron<br>[3.69]                | Vit A<br>[2.16]                 | Typh +<br>Paratyph<br>[78.64]  | Neonatal<br>[1.53]             | Malaria<br>[269.63]           | Diarrhea<br>[1.34]   | Congenital<br>[0.61] | LRI<br>[0.49]        | Hemog<br>[1.72]      | ID<br>[5.12]         |
| Haryana           | Iron<br>[4.72]                | Typh +<br>Paratyph<br>[187.72]  | Vit A<br>[2.53]                | Neonatal<br>[1.51]             | Diarrhea<br>[1.17]            | Congenital<br>[0.53] | Malaria<br>[142.96]  | LRI<br>[0.44]        | Hemog<br>[2.1]       | Oth NTD<br>[6.06]    |
| Himachal Pradesh  | Iron<br>[5.53]                | Vit A<br>[2.49]                 | Typh +<br>Paratyph<br>[254.29] | Neonatal<br>[1.63]             | Congenital<br>[0.6]           | Diarrhea<br>[1.5]    | LRI<br>[0.58]        | Hemog<br>[2.2]       | Dermatitis<br>[0.49] | ID<br>[5.11]         |
| Jammu & Kashmir   | Iron<br>[1.95]                | Vit A<br>[2.1]                  | Neonatal<br>[1.51]             | Typh +<br>Paratyph<br>[52.65]  | Congenital<br>[0.77]          | Diarrhea<br>[1.5]    | LRI<br>[0.77]        | Road Inj<br>[0.4]    | Drown<br>[0.46]      | ID<br>[6.22]         |
| Jharkhand         | Diarrhea<br>[1.99]            | Iron<br>[1.8]                   | Vit A<br>[1.55]                | Typh +<br>Paratyph<br>[10.58]  | Malaria<br>[48.0]             | Drown<br>[0.91]      | LRI<br>[0.61]        | Neonatal<br>[1.7]    | Congenital<br>[0.73] | Road Inj<br>[0.31]   |
| Karnataka         | Iron<br>[1.84]                | Vit A<br>[1.92]                 | Neonatal<br>[1.77]             | Typh +<br>Paratyph<br>[43.18]  | Congenital<br>[0.82]          | Diarrhea<br>[1.29]   | Drown<br>[0.52]      | LRI<br>[0.36]        | Epilepsy<br>[0.91]   | ID<br>[5.35]         |
| Kerala            | Neonatal<br>[2.01]            | Vit A<br>[2.41]                 | Iron<br>[1.54]                 | Congenital<br>[0.74]           | Diarrhea<br>[1.06]            | Dermatitis<br>[0.48] | Skin Viral<br>[0.8]  | Conduct<br>[0.78]    | ID<br>[4.9]          | Epilepsy<br>[0.7]    |
| Madhya Pradesh    | Typh +<br>Paratyph<br>[21.21] | Iron<br>[2.13]                  | Vit A<br>[1.67]                | Diarrhea<br>[1.01]             | Neonatal<br>[1.51]            | LRI<br>[0.54]        | Malaria<br>[30.9]    | Drown<br>[0.58]      | Congenital<br>[0.48] | Animal<br>[5.77]     |
| Maharashtra       | Iron<br>[3.24]                | Vit A<br>[2.29]                 | Neonatal<br>[1.62]             | Typh +<br>Paratyph<br>[143.63] | Congenital<br>[0.66]          | Diarrhea<br>[1.52]   | Malaria<br>[208.67]  | LRI<br>[0.58]        | Drown<br>[0.39]      | ID<br>[5.18]         |

**eFigure 7d. Leading ten causes of DALYs with the ratio of observed DALYs to DALYs expected on the basis of Socio-Demographic Index alone in 2017, 5-9 years, both sexes combined.** The top ten causes contributing to DALYs are listed globally, by socio-demographic quintile, and then by GBD superregion, region, country, and subnationally where modeled. For each cell, the ratio of observed DALYs to DALYs expected on the basis of socio-demographic index (SDI) alone are listed. Abbreviations: DALY=disability-adjusted life year, GBD=Global Burden of Disease.

Values shown in brackets represent the ratio of observed DALYs to predicted DALYs on the basis of Socio-Demographic Index (SDI), rounded to two (2) digits. Color ranges (shown below) were calculated to place a roughly equal number of cells into each bin.

| COLOR KEY:                             |                             | [0.0-0.62]                  | [0.62-0.79]          | [0.79-0.89]                 | [0.89-0.97]                | [0.97-1.07]          | [1.07-1.26]          | [1.26-1.44]          | [1.44-2.32]          | 2.32+                       |
|----------------------------------------|-----------------------------|-----------------------------|----------------------|-----------------------------|----------------------------|----------------------|----------------------|----------------------|----------------------|-----------------------------|
|                                        | 1                           | 2                           | 3                    | 4                           | 5                          | 6                    | 7                    | 8                    | 9                    | 10                          |
| Manipur                                | Typh + Paratyph<br>[123.5]  | Neonatal<br>[1.69]          | Vit A<br>[1.36]      | Diarrhea<br>[1.38]          | Iron<br>[0.7]              | Congenital<br>[0.56] | Malaria<br>[157.49]  | Drown<br>[0.42]      | ID<br>[6.81]         | LRI<br>[0.43]               |
| Meghalaya                              | Iron<br>[2.3]               | Typh + Paratyph<br>[82.44]  | Malaria<br>[457.64]  | Vit A<br>[2.07]             | Neonatal<br>[1.63]         | Diarrhea<br>[1.11]   | Congenital<br>[0.56] | LRI<br>[0.48]        | ID<br>[6.25]         | Dermatitis<br>[0.52]        |
| Mizoram                                | Typh + Paratyph<br>[322.98] | Malaria<br>[565.28]         | Neonatal<br>[1.66]   | Vit A<br>[1.85]             | Congenital<br>[0.54]       | Diarrhea<br>[1.21]   | LRI<br>[0.64]        | Iron<br>[0.63]       | ID<br>[6.14]         | Dermatitis<br>[0.51]        |
| Nagaland                               | Typh + Paratyph<br>[368.82] | Iron<br>[2.14]              | Malaria<br>[993.73]  | Neonatal<br>[1.72]          | Vit A<br>[1.81]            | LRI<br>[0.77]        | Congenital<br>[0.47] | Drown<br>[0.52]      | Diarrhea<br>[1.22]   | HIV<br>[11.2]               |
| Odisha                                 | Malaria<br>[230.48]         | Typh + Paratyph<br>[29.14]  | Diarrhea<br>[1.95]   | Vit A<br>[1.7]              | Neonatal<br>[1.48]         | LRI<br>[0.58]        | Iron<br>[0.73]       | Drown<br>[0.54]      | Congenital<br>[0.54] | Animal<br>[7.16]            |
| Punjab                                 | Iron<br>[3.8]               | Typh + Paratyph<br>[198.42] | Vit A<br>[2.38]      | Neonatal<br>[1.54]          | Congenital<br>[0.46]       | Diarrhea<br>[0.89]   | Dermatitis<br>[0.48] | ID<br>[5.05]         | Hemog<br>[1.81]      | Conduct<br>[0.83]           |
| Rajasthan                              | Typh + Paratyph<br>[26.06]  | Iron<br>[1.8]               | Vit A<br>[1.58]      | Diarrhea<br>[0.85]          | Neonatal<br>[1.48]         | LRI<br>[0.53]        | Malaria<br>[27.37]   | Drown<br>[0.42]      | Congenital<br>[0.44] | ID<br>[6.0]                 |
| Sikkim                                 | Iron<br>[3.65]              | Typh + Paratyph<br>[280.78] | Vit A<br>[2.31]      | Neonatal<br>[1.67]          | LRI<br>[0.91]              | Diarrhea<br>[1.64]   | Congenital<br>[0.58] | Dermatitis<br>[0.49] | Skin Viral<br>[0.81] | Conduct<br>[0.81]           |
| Tamil Nadu                             | Iron<br>[3.36]              | Vit A<br>[2.4]              | Neonatal<br>[1.57]   | Typh + Paratyph<br>[134.79] | Diarrhea<br>[1.99]         | Congenital<br>[0.84] | Drown<br>[0.56]      | LRI<br>[0.66]        | Road Inj<br>[0.28]   | Encepha<br>[2.41]           |
| Telangana                              | Iron<br>[2.67]              | Typh + Paratyph<br>[71.74]  | Vit A<br>[1.93]      | Neonatal<br>[1.65]          | Diarrhea<br>[1.46]         | Congenital<br>[0.53] | Malaria<br>[89.05]   | ID<br>[5.31]         | Drown<br>[0.3]       | LRI<br>[0.29]               |
| Tripura                                | Iron<br>[1.76]              | Vit A<br>[2.04]             | Malaria<br>[231.63]  | Neonatal<br>[1.62]          | Typh + Paratyph<br>[22.67] | Diarrhea<br>[1.11]   | LRI<br>[0.55]        | Congenital<br>[0.64] | Drown<br>[0.4]       | ID<br>[6.25]                |
| Uttar Pradesh                          | Typh + Paratyph<br>[23.9]   | Iron<br>[1.66]              | Vit A<br>[1.67]      | Diarrhea<br>[1.42]          | LRI<br>[0.63]              | Neonatal<br>[1.46]   | Malaria<br>[33.74]   | Congenital<br>[0.59] | Meningitis<br>[0.59] | Road Inj<br>[0.27]          |
| Uttarakhand                            | Typh + Paratyph<br>[229.9]  | Iron<br>[2.99]              | Vit A<br>[1.94]      | Neonatal<br>[1.64]          | Diarrhea<br>[1.44]         | Congenital<br>[0.56] | LRI<br>[0.63]        | Road Inj<br>[0.26]   | Malaria<br>[123.28]  | Dermatitis<br>[0.51]        |
| W Bengal                               | Iron<br>[1.61]              | Vit A<br>[1.84]             | Neonatal<br>[1.5]    | Typh + Paratyph<br>[15.43]  | Diarrhea<br>[0.87]         | Congenital<br>[0.59] | Drown<br>[0.45]      | ID<br>[6.74]         | LRI<br>[0.3]         | Malaria<br>[54.38]          |
| UTs other than Delhi                   | Iron<br>[4.77]              | Vit A<br>[2.89]             | Neonatal<br>[1.75]   | Typh + Paratyph<br>[246.32] | Malaria<br>[812.61]        | Congenital<br>[0.63] | Diarrhea<br>[1.64]   | LRI<br>[0.68]        | Drown<br>[0.48]      | Road Inj<br>[0.27]          |
| Nepal                                  | Typh + Paratyph<br>[3.98]   | Iron<br>[0.81]              | Neonatal<br>[1.9]    | Diarrhea<br>[0.52]          | Vit A<br>[0.65]            | Road Inj<br>[0.26]   | Dermatitis<br>[0.89] | Malaria<br>[4.11]    | LRI<br>[0.2]         | Drown<br>[0.26]             |
| Pakistan                               | Iron<br>[1.95]              | Diarrhea<br>[1.25]          | Road Inj<br>[0.77]   | Typh + Paratyph<br>[10.61]  | Drown<br>[0.84]            | LRI<br>[0.61]        | Neonatal<br>[1.42]   | Congenital<br>[0.79] | Vit A<br>[0.8]       | Malaria<br>[32.73]          |
| Southeast Asia, East Asia, and Oceania | Drown<br>[1.82]             | Road Inj<br>[0.75]          | Neonatal<br>[1.06]   | Congenital<br>[0.78]        | Asthma<br>[0.99]           | Dermatitis<br>[0.64] | LRI<br>[1.0]         | Leukemia<br>[0.87]   | Skin Viral<br>[1.05] | Typh + Paratyph<br>[225.32] |
| East Asia                              | Drown<br>[2.65]             | Road Inj<br>[1.04]          | Neonatal<br>[1.35]   | Congenital<br>[0.75]        | Asthma<br>[0.81]           | Leukemia<br>[1.02]   | Skin Viral<br>[1.11] | Dermatitis<br>[0.52] | Falls<br>[1.22]      | Hernia<br>[4.38]            |
| China                                  | Drown<br>[2.59]             | Road Inj<br>[1.03]          | Neonatal<br>[1.37]   | Congenital<br>[0.74]        | Asthma<br>[0.79]           | Leukemia<br>[1.01]   | Skin Viral<br>[1.11] | Dermatitis<br>[0.51] | Falls<br>[1.24]      | Hernia<br>[4.38]            |
| N Korea                                | Drown<br>[1.04]             | Road Inj<br>[0.47]          | Congenital<br>[0.54] | Vit A<br>[0.58]             | Neonatal<br>[0.72]         | Diarrhea<br>[0.59]   | Asthma<br>[0.69]     | LRI<br>[0.32]        | Leukemia<br>[0.71]   | Dermatitis<br>[0.65]        |
| Taiwan                                 | Asthma<br>[1.9]             | Dermatitis<br>[0.6]         | Neonatal<br>[0.57]   | Congenital<br>[0.77]        | Skin Viral<br>[1.04]       | Conduct<br>[0.81]    | Anxiety<br>[0.72]    | Diarrhea<br>[2.03]   | Road Inj<br>[0.51]   | Urticaria<br>[1.35]         |

**eFigure 7d. Leading ten causes of DALYs with the ratio of observed DALYs to DALYs expected on the basis of Socio-Demographic Index alone in 2017, 5-9 years, both sexes combined.** The top ten causes contributing to DALYs are listed globally, by socio-demographic quintile, and then by GBD superregion, region, country, and subnationally where modeled. For each cell, the ratio of observed DALYs to DALYs expected on the basis of socio-demographic index (SDI) alone are listed. Abbreviations: DALY=disability-adjusted life year, GBD=Global Burden of Disease.

Values shown in brackets represent the ratio of observed DALYs to predicted DALYs on the basis of Socio-Demographic Index (SDI), rounded to two (2) digits. Color ranges (shown below) were calculated to place a roughly equal number of cells into each bin.

| COLOR KEY:            |                             | [0.0-0.62]                  | [0.62-0.79]                | [0.79-0.89]                 | [0.89-0.97]          | [0.97-1.07]          | [1.07-1.26]          | [1.26-1.44]               | [1.44-2.32]               | 2.32+                     |
|-----------------------|-----------------------------|-----------------------------|----------------------------|-----------------------------|----------------------|----------------------|----------------------|---------------------------|---------------------------|---------------------------|
|                       | 1                           | 2                           | 3                          | 4                           | 5                    | 6                    | 7                    | 8                         | 9                         | 10                        |
| <b>Oceania</b>        | LRI<br>[1.0]                | Iron<br>[1.23]              | Diarrhea<br>[0.9]          | Asthma<br>[1.92]            | Congenital<br>[0.91] | Drown<br>[0.73]      | Road Inj<br>[0.45]   | RHD<br>[4.01]             | Dermatitis<br>[1.02]      | Typh + Paratyph<br>[3.1]  |
| Am Samoa              | Asthma<br>[2.17]            | Iron<br>[2.17]              | Dermatitis<br>[0.93]       | Diarrhea<br>[2.33]          | Vit A<br>[1.25]      | Neonatal<br>[0.69]   | Congenital<br>[0.58] | Skin Viral<br>[0.99]      | Road Inj<br>[0.34]        | Drown<br>[0.6]            |
| Micronesia            | Iron<br>[1.64]              | Vit A<br>[1.67]             | Asthma<br>[1.71]           | Congenital<br>[0.79]        | Road Inj<br>[0.5]    | Dermatitis<br>[1.03] | LRI<br>[0.56]        | Diarrhea<br>[0.96]        | Drown<br>[0.47]           | Neonatal<br>[0.71]        |
| Fiji                  | Iron<br>[1.86]              | Asthma<br>[1.88]            | Congenital<br>[1.04]       | LRI<br>[1.33]               | Road Inj<br>[0.56]   | Drown<br>[0.8]       | Diarrhea<br>[1.86]   | Dermatitis<br>[0.97]      | Neonatal<br>[0.65]        | Vit A<br>[0.86]           |
| Guam                  | Asthma<br>[2.22]            | Diarrhea<br>[5.79]          | Iron<br>[3.91]             | Dermatitis<br>[0.87]        | Congenital<br>[0.91] | Road Inj<br>[0.89]   | Neonatal<br>[0.74]   | Skin Viral<br>[0.97]      | LRI<br>[2.33]             | Conduct<br>[0.79]         |
| Kiribati              | Iron<br>[1.28]              | Congenital<br>[1.31]        | Meningitis<br>[1.03]       | Vit A<br>[0.95]             | Asthma<br>[1.82]     | Measles<br>[1.74]    | LRI<br>[0.45]        | Diarrhea<br>[0.49]        | Road Inj<br>[0.3]         | Typh + Paratyph<br>[1.68] |
| Marshall              | Vit A<br>[1.17]             | Asthma<br>[1.57]            | Congenital<br>[0.85]       | Road Inj<br>[0.51]          | LRI<br>[0.5]         | Dermatitis<br>[1.04] | Iron<br>[0.57]       | Diarrhea<br>[0.75]        | Neonatal<br>[0.74]        | Drown<br>[0.43]           |
| N Mariana             | Asthma<br>[2.28]            | Neonatal<br>[0.84]          | Dermatitis<br>[0.9]        | Diarrhea<br>[3.19]          | Vit A<br>[1.94]      | Congenital<br>[0.6]  | Iron<br>[1.24]       | Skin Viral<br>[0.98]      | Road Inj<br>[0.43]        | Drown<br>[0.8]            |
| PNG                   | LRI<br>[0.94]               | Iron<br>[1.09]              | Diarrhea<br>[0.72]         | Asthma<br>[1.99]            | Drown<br>[0.76]      | Congenital<br>[0.91] | Road Inj<br>[0.43]   | RHD<br>[4.08]             | Typh + Paratyph<br>[1.62] | Meningitis<br>[0.43]      |
| Samoa                 | Iron<br>[1.55]              | Vit A<br>[1.34]             | Asthma<br>[1.62]           | Dermatitis<br>[1.04]        | Congenital<br>[0.57] | Diarrhea<br>[0.97]   | Neonatal<br>[0.73]   | Road Inj<br>[0.27]        | Skin Viral<br>[1.06]      | LRI<br>[0.31]             |
| Solomon               | Iron<br>[1.62]              | LRI<br>[0.65]               | Vit A<br>[0.77]            | Road Inj<br>[0.45]          | Asthma<br>[1.48]     | Congenital<br>[0.78] | Drown<br>[0.41]      | Dermatitis<br>[1.02]      | Diarrhea<br>[0.3]         | Falls<br>[1.79]           |
| Tonga                 | Asthma<br>[2.26]            | Meningitis<br>[2.17]        | Dermatitis<br>[1.0]        | Road Inj<br>[0.43]          | Iron<br>[0.79]       | Diarrhea<br>[1.44]   | Vit A<br>[0.88]      | Neonatal<br>[0.69]        | Congenital<br>[0.52]      | LRI<br>[0.62]             |
| Vanuatu               | Iron<br>[1.09]              | Asthma<br>[1.76]            | Road Inj<br>[0.55]         | Vit A<br>[0.98]             | Congenital<br>[0.88] | LRI<br>[0.47]        | Drown<br>[0.55]      | Dermatitis<br>[1.02]      | Diarrhea<br>[0.42]        | Typh + Paratyph<br>[3.14] |
| <b>Southeast Asia</b> | Drown<br>[0.96]             | Congenital<br>[0.78]        | Asthma<br>[1.17]           | Typh + Paratyph<br>[142.28] | LRI<br>[0.92]        | Road Inj<br>[0.42]   | Neonatal<br>[0.72]   | Diarrhea<br>[1.52]        | Dermatitis<br>[0.82]      | Dengue<br>[22.23]         |
| Cambodia              | Iron<br>[1.59]              | Drown<br>[0.92]             | Mech<br>[2.85]             | Vit A<br>[0.71]             | LRI<br>[0.41]        | Congenital<br>[0.6]  | Road Inj<br>[0.33]   | Typh + Paratyph<br>[3.92] | Dermatitis<br>[1.02]      | Asthma<br>[0.82]          |
| Indonesia             | Typh + Paratyph<br>[254.58] | Asthma<br>[1.17]            | Diarrhea<br>[1.98]         | Dengue<br>[33.36]           | Vit A<br>[1.07]      | Road Inj<br>[0.43]   | Neonatal<br>[0.73]   | Congenital<br>[0.58]      | Drown<br>[0.64]           | Dermatitis<br>[0.61]      |
| Laos                  | Drown<br>[1.03]             | Road Inj<br>[0.69]          | Typh + Paratyph<br>[15.71] | Vit A<br>[0.99]             | Congenital<br>[0.79] | LRI<br>[0.57]        | Asthma<br>[1.11]     | Diarrhea<br>[0.69]        | Iron<br>[0.53]            | Dermatitis<br>[1.03]      |
| Malaysia              | Dermatitis<br>[0.95]        | Neonatal<br>[0.81]          | Asthma<br>[0.99]           | Congenital<br>[0.7]         | Diarrhea<br>[2.36]   | Skin Viral<br>[0.98] | Road Inj<br>[0.46]   | Dengue<br>[427.11]        | Leukemia<br>[0.96]        | LRI<br>[1.59]             |
| Maldives              | Dermatitis<br>[0.96]        | Asthma<br>[1.01]            | Congenital<br>[0.63]       | Neonatal<br>[0.66]          | Dengue<br>[27.39]    | Iron<br>[0.69]       | Drown<br>[0.53]      | Skin Viral<br>[1.0]       | Conduct<br>[0.85]         | Road Inj<br>[0.22]        |
| Mauritius             | Iron<br>[2.61]              | Asthma<br>[1.27]            | Dermatitis<br>[0.91]       | Neonatal<br>[0.82]          | Congenital<br>[0.72] | Diarrhea<br>[1.82]   | Skin Viral<br>[0.98] | Epilepsy<br>[1.05]        | Conduct<br>[0.83]         | Vit A<br>[0.7]            |
| Myanmar               | Typh + Paratyph<br>[36.54]  | Congenital<br>[1.06]        | Drown<br>[0.9]             | Iron<br>[0.83]              | LRI<br>[0.67]        | Vit A<br>[0.82]      | Asthma<br>[1.0]      | Dermatitis<br>[1.04]      | Road Inj<br>[0.34]        | Diarrhea<br>[0.84]        |
| Philippines           | LRI<br>[1.96]               | Congenital<br>[1.19]        | Drown<br>[1.18]            | Asthma<br>[1.72]            | Dengue<br>[34.36]    | Road Inj<br>[0.5]    | Dermatitis<br>[1.05] | Diarrhea<br>[1.42]        | Neonatal<br>[0.77]        | Leukemia<br>[1.04]        |
| Sri Lanka             | Congenital<br>[0.83]        | Dermatitis<br>[0.9]         | Asthma<br>[1.0]            | Typh + Paratyph<br>[308.81] | Neonatal<br>[0.74]   | Vit A<br>[1.15]      | Iron<br>[1.02]       | Skin Viral<br>[1.02]      | Epilepsy<br>[1.0]         | Conduct<br>[0.83]         |
| Seychelles            | Drown<br>[1.77]             | LRI<br>[1.91]               | Congenital<br>[0.88]       | Dermatitis<br>[0.94]        | Neonatal<br>[0.81]   | Asthma<br>[1.04]     | Meningitis<br>[2.15] | Vit A<br>[0.8]            | Skin Viral<br>[0.99]      | Road Inj<br>[0.3]         |
| Thailand              | Drown<br>[1.97]             | Typh + Paratyph<br>[475.62] | Road Inj<br>[0.66]         | Congenital<br>[0.79]        | Dermatitis<br>[0.98] | Asthma<br>[0.98]     | Neonatal<br>[0.67]   | Skin Viral<br>[0.99]      | LRI<br>[0.85]             | Conduct<br>[0.84]         |

**eFigure 7d. Leading ten causes of DALYs with the ratio of observed DALYs to DALYs expected on the basis of Socio-Demographic Index alone in 2017, 5-9 years, both sexes combined.** The top ten causes contributing to DALYs are listed globally, by socio-demographic quintile, and then by GBD superregion, region, country, and subnationally where modeled. For each cell, the ratio of observed DALYs to DALYs expected on the basis of socio-demographic index (SDI) alone are listed. Abbreviations: DALY=disability-adjusted life year, GBD=Global Burden of Disease.

Values shown in brackets represent the ratio of observed DALYs to predicted DALYs on the basis of Socio-Demographic Index (SDI), rounded to two (2) digits. Color ranges (shown below) were calculated to place a roughly equal number of cells into each bin.

| COLOR KEY:                 |                    | [0.0-0.62]           | [0.62-0.79]                    | [0.79-0.89]                   | [0.89-0.97]          | [0.97-1.07]          | [1.07-1.26]                  | [1.26-1.44]                  | [1.44-2.32]                   | 2.32+                        |
|----------------------------|--------------------|----------------------|--------------------------------|-------------------------------|----------------------|----------------------|------------------------------|------------------------------|-------------------------------|------------------------------|
|                            | 1                  | 2                    | 3                              | 4                             | 5                    | 6                    | 7                            | 8                            | 9                             | 10                           |
| Timor-Leste                | Iron<br>[1.05]     | Drown<br>[0.72]      | Congenital<br>[0.8]            | Typh +<br>Paratyph<br>[8.5]   | Vit A<br>[0.66]      | LRI<br>[0.39]        | Asthma<br>[0.96]             | Dermatitis<br>[1.02]         | Diarrhea<br>[0.53]            | Road Inj<br>[0.26]           |
| Vietnam                    | Drown<br>[1.01]    | Congenital<br>[0.6]  | Dermatitis<br>[0.84]           | Typh +<br>Paratyph<br>[44.47] | Neonatal<br>[0.61]   | Asthma<br>[0.74]     | Skin Viral<br>[1.04]         | Road Inj<br>[0.23]           | Vit A<br>[0.5]                | Conduct<br>[0.87]            |
| Sub-Saharan Africa         | Malaria<br>[37.89] | Iron<br>[1.43]       | HIV<br>[21.71]                 | Diarrhea<br>[0.93]            | Vit A<br>[1.22]      | LRI<br>[0.51]        | Road Inj<br>[0.43]           | Meningitis<br>[0.6]          | Congenital<br>[0.59]          | Dermatitis<br>[1.0]          |
| Central Sub-Saharan Africa | Malaria<br>[71.78] | Iron<br>[1.51]       | Vit A<br>[1.34]                | Diarrhea<br>[1.0]             | Road Inj<br>[0.73]   | HIV<br>[13.54]       | Meningitis<br>[0.77]         | LRI<br>[0.45]                | Hemog<br>[2.07]               | Congenital<br>[0.59]         |
| Angola                     | Iron<br>[1.97]     | Diarrhea<br>[1.28]   | Malaria<br>[30.76]             | Road Inj<br>[0.72]            | HIV<br>[15.37]       | Vit A<br>[1.16]      | Meningitis<br>[0.77]         | LRI<br>[0.42]                | Neonatal<br>[1.21]            | Dermatitis<br>[1.16]         |
| C African Rep              | Malaria<br>[5.24]  | Road Inj<br>[1.65]   | Conflict<br>Terror<br>[167.03] | Iron<br>[1.66]                | HIV<br>[29.25]       | Diarrhea<br>[0.84]   | Vit A<br>[1.06]              | Meningitis<br>[0.87]         | LRI<br>[0.55]                 | Hemog<br>[2.44]              |
| Congo                      | HIV<br>[77.88]     | Malaria<br>[2142.75] | Iron<br>[2.16]                 | Vit A<br>[2.43]               | Diarrhea<br>[2.9]    | Road Inj<br>[0.86]   | LRI<br>[0.82]                | Neonatal<br>[1.13]           | Meningitis<br>[1.62]          | Asthma<br>[1.22]             |
| Congo DR                   | Malaria<br>[9.21]  | Iron<br>[1.07]       | Vit A<br>[1.03]                | Diarrhea<br>[0.51]            | Road Inj<br>[0.59]   | LRI<br>[0.33]        | Meningitis<br>[0.51]         | HIV<br>[8.58]                | Hemog<br>[1.71]               | Oncho<br>[144.34]            |
| Eq Guinea                  | HIV<br>[186.66]    | Malaria<br>[2142.75] | Iron<br>[1.59]                 | Road Inj<br>[0.69]            | Diarrhea<br>[2.16]   | Vit A<br>[1.3]       | Dermatitis<br>[1.12]         | Asthma<br>[1.1]              | Epilepsy<br>[1.67]            | Neonatal<br>[0.73]           |
| Gabon                      | Iron<br>[5.13]     | Malaria<br>[2274.7]  | HIV<br>[38.52]                 | Road Inj<br>[0.99]            | Vit A<br>[2.23]      | Neonatal<br>[1.22]   | Diarrhea<br>[2.68]           | Dermatitis<br>[1.1]          | Asthma<br>[1.2]               | Epilepsy<br>[1.8]            |
| Eastern Sub-Saharan Africa | HIV<br>[32.87]     | Diarrhea<br>[0.73]   | Vit A<br>[0.89]                | Iron<br>[0.79]                | Malaria<br>[3.72]    | LRI<br>[0.41]        | Road Inj<br>[0.33]           | Congenital<br>[0.59]         | Neonatal<br>[1.46]            | Meningitis<br>[0.4]          |
| Burundi                    | Malaria<br>[2.34]  | Diarrhea<br>[0.48]   | LRI<br>[0.39]                  | Iron<br>[0.61]                | Road Inj<br>[0.43]   | HIV<br>[11.55]       | Congenital<br>[0.72]         | Vit A<br>[0.43]              | Typh +<br>Paratyph<br>[0.57]  | Dermatitis<br>[1.18]         |
| Comoros                    | Iron<br>[1.39]     | Diarrhea<br>[0.88]   | Vit A<br>[0.87]                | LRI<br>[0.49]                 | Neonatal<br>[1.61]   | Road Inj<br>[0.38]   | Congenital<br>[0.64]         | Dermatitis<br>[1.16]         | Asthma<br>[0.96]              | Meningitis<br>[0.44]         |
| Djibouti                   | HIV<br>[18.31]     | Diarrhea<br>[0.85]   | LRI<br>[0.56]                  | Iron<br>[0.69]                | Road Inj<br>[0.45]   | Neonatal<br>[1.35]   | Congenital<br>[0.66]         | Dermatitis<br>[1.16]         | Typh +<br>Paratyph<br>[4.73]  | Meningitis<br>[0.54]         |
| Eritrea                    | Diarrhea<br>[1.22] | Iron<br>[1.37]       | LRI<br>[0.56]                  | Vit A<br>[0.74]               | Road Inj<br>[0.48]   | HIV<br>[8.72]        | Neonatal<br>[1.64]           | Meningitis<br>[0.52]         | Congenital<br>[0.63]          | Typh +<br>Paratyph<br>[1.59] |
| Ethiopia                   | Diarrhea<br>[0.59] | Vit A<br>[0.97]      | Iron<br>[0.6]                  | HIV<br>[10.88]                | LRI<br>[0.31]        | Meningitis<br>[0.39] | Neonatal<br>[1.77]           | Typh +<br>Paratyph<br>[0.67] | Road Inj<br>[0.25]            | Dermatitis<br>[1.05]         |
| Kenya                      | HIV<br>[26.8]      | Diarrhea<br>[1.49]   | Neonatal<br>[1.73]             | Vit A<br>[1.02]               | Congenital<br>[0.71] | LRI<br>[0.47]        | Typh +<br>Paratyph<br>[6.85] | Dermatitis<br>[1.15]         | iNTS<br>[3.09]                | Meningitis<br>[0.68]         |
| Baringo                    | Diarrhea<br>[1.04] | Vit A<br>[0.95]      | Neonatal<br>[1.88]             | Leish<br>[23.69]              | Congenital<br>[0.68] | LRI<br>[0.37]        | Typh +<br>Paratyph<br>[2.65] | iNTS<br>[2.35]               | Dermatitis<br>[1.12]          | Meningitis<br>[0.5]          |
| Bomet                      | HIV<br>[50.85]     | Neonatal<br>[2.03]   | Diarrhea<br>[1.09]             | Vit A<br>[0.68]               | Dermatitis<br>[1.12] | Congenital<br>[0.54] | Typh +<br>Paratyph<br>[5.06] | Asthma<br>[0.67]             | iNTS<br>[1.9]                 | LRI<br>[0.2]                 |
| Bungoma                    | Diarrhea<br>[1.09] | Vit A<br>[1.31]      | Neonatal<br>[1.89]             | Malaria<br>[25.13]            | Congenital<br>[0.62] | Iron<br>[0.52]       | iNTS<br>[2.45]               | Dermatitis<br>[1.12]         | HIV<br>[6.87]                 | Typh +<br>Paratyph<br>[2.96] |
| Busia                      | Malaria<br>[33.66] | Diarrhea<br>[0.89]   | Vit A<br>[1.16]                | Neonatal<br>[1.89]            | iNTS<br>[2.69]       | Congenital<br>[0.67] | LRI<br>[0.37]                | Dermatitis<br>[1.12]         | Typh +<br>Paratyph<br>[2.03]  | Meningitis<br>[0.47]         |
| Elgeyo-Marakwet            | Diarrhea<br>[1.58] | Neonatal<br>[2.01]   | HIV<br>[13.84]                 | Congenital<br>[0.65]          | Dermatitis<br>[1.13] | Vit A<br>[0.62]      | Typh +<br>Paratyph<br>[5.25] | LRI<br>[0.35]                | Meningitis<br>[0.52]          | Asthma<br>[0.68]             |
| Embu                       | Diarrhea<br>[2.07] | HIV<br>[20.53]       | Vit A<br>[1.51]                | Neonatal<br>[1.87]            | Congenital<br>[0.71] | LRI<br>[0.51]        | Iron<br>[0.62]               | Dermatitis<br>[1.13]         | Typh +<br>Paratyph<br>[12.88] | Meningitis<br>[0.77]         |

**eFigure 7d. Leading ten causes of DALYs with the ratio of observed DALYs to DALYs expected on the basis of Socio-Demographic Index alone in 2017, 5-9 years, both sexes combined.** The top ten causes contributing to DALYs are listed globally, by socio-demographic quintile, and then by GBD superregion, region, country, and subnationally where modeled. For each cell, the ratio of observed DALYs to DALYs expected on the basis of socio-demographic index (SDI) alone are listed. Abbreviations: DALY=disability-adjusted life year, GBD=Global Burden of Disease.

Values shown in brackets represent the ratio of observed DALYs to predicted DALYs on the basis of Socio-Demographic Index (SDI), rounded to two (2) digits. Color ranges (shown below) were calculated to place a roughly equal number of cells into each bin.

| COLOR KEY: |                                 | [0.0-0.62]         | [0.62-0.79]          | [0.79-0.89]                    | [0.89-0.97]                   | [0.97-1.07]                   | [1.07-1.26]                   | [1.26-1.44]                  | [1.44-2.32]                  | 2.32+                        |
|------------|---------------------------------|--------------------|----------------------|--------------------------------|-------------------------------|-------------------------------|-------------------------------|------------------------------|------------------------------|------------------------------|
|            | 1                               | 2                  | 3                    | 4                              | 5                             | 6                             | 7                             | 8                            | 9                            | 10                           |
| Garissa    | Diarrhea<br>[0.5]               | HIV<br>[13.49]     | Neonatal<br>[2.59]   | Vit A<br>[0.58]                | iNTS<br>[1.38]                | Congenital<br>[0.59]          | Dermatitis<br>[1.13]          | Typh +<br>Paratyph<br>[0.58] | LRI<br>[0.21]                | Meningitis<br>[0.28]         |
| HomaBay    | HIV<br>[88.02]                  | Diarrhea<br>[1.24] | Vit A<br>[1.34]      | Road Inj<br>[0.8]              | LRI<br>[0.59]                 | iNTS<br>[3.72]                | Malaria<br>[10.1]             | Congenital<br>[0.85]         | Meningitis<br>[0.71]         | Iron<br>[0.65]               |
| Isiolo     | Diarrhea<br>[0.64]              | HIV<br>[13.72]     | LRI<br>[0.46]        | Conflict<br>Terror<br>[123.04] | Vit A<br>[0.73]               | Congenital<br>[0.79]          | Meningitis<br>[0.58]          | Neonatal<br>[1.76]           | Typh +<br>Paratyph<br>[1.32] | iNTS<br>[1.76]               |
| Kajiado    | Neonatal<br>[2.03]              | Diarrhea<br>[1.45] | Vit A<br>[0.89]      | Congenital<br>[0.67]           | Typh +<br>Paratyph<br>[13.48] | Dermatitis<br>[1.13]          | HIV<br>[9.55]                 | LRI<br>[0.4]                 | Meningitis<br>[0.69]         | Asthma<br>[0.71]             |
| Kakamega   | HIV<br>[21.41]                  | Diarrhea<br>[1.17] | Vit A<br>[1.28]      | Malaria<br>[18.35]             | LRI<br>[0.49]                 | Neonatal<br>[1.61]            | Congenital<br>[0.75]          | iNTS<br>[2.82]               | Typh +<br>Paratyph<br>[3.02] | Meningitis<br>[0.63]         |
| Kericho    | HIV<br>[26.69]                  | Neonatal<br>[2.14] | Diarrhea<br>[1.24]   | Vit A<br>[0.91]                | Congenital<br>[0.63]          | iNTS<br>[3.17]                | Dermatitis<br>[1.12]          | Typh +<br>Paratyph<br>[6.17] | LRI<br>[0.32]                | Asthma<br>[0.68]             |
| Kiambu     | Neonatal<br>[1.93]              | Diarrhea<br>[2.11] | HIV<br>[20.96]       | Congenital<br>[0.77]           | LRI<br>[0.7]                  | Dermatitis<br>[1.14]          | Typh +<br>Paratyph<br>[32.81] | Meningitis<br>[1.15]         | Vit A<br>[0.68]              | Road Inj<br>[0.31]           |
| Kilifi     | HIV<br>[18.98]                  | Diarrhea<br>[1.07] | Vit A<br>[0.99]      | Neonatal<br>[1.79]             | Iron<br>[0.61]                | Congenital<br>[0.68]          | Typh +<br>Paratyph<br>[3.05]  | LRI<br>[0.37]                | Dermatitis<br>[1.12]         | Meningitis<br>[0.52]         |
| Kirinyaga  | HIV<br>[26.0]                   | Diarrhea<br>[2.09] | Neonatal<br>[1.94]   | Congenital<br>[0.76]           | LRI<br>[0.58]                 | Typh +<br>Paratyph<br>[13.48] | Dermatitis<br>[1.14]          | Meningitis<br>[0.86]         | Road Inj<br>[0.32]           | Asthma<br>[0.72]             |
| Kisii      | Diarrhea<br>[2.21]              | Neonatal<br>[1.56] | Congenital<br>[0.73] | LRI<br>[0.52]                  | iNTS<br>[4.12]                | Typh +<br>Paratyph<br>[10.71] | Dermatitis<br>[1.13]          | Vit A<br>[0.7]               | Meningitis<br>[0.73]         | Road Inj<br>[0.29]           |
| Kisumu     | HIV<br>[46.25]                  | Diarrhea<br>[1.76] | Vit A<br>[1.21]      | Malaria<br>[73.26]             | LRI<br>[0.66]                 | iNTS<br>[4.71]                | Congenital<br>[0.82]          | Typh +<br>Paratyph<br>[8.38] | Meningitis<br>[0.89]         | Neonatal<br>[1.1]            |
| Kitui      | HIV<br>[21.59]                  | Diarrhea<br>[1.1]  | Neonatal<br>[2.15]   | Typh +<br>Paratyph<br>[3.41]   | Congenital<br>[0.61]          | iNTS<br>[2.36]                | Dermatitis<br>[1.12]          | LRI<br>[0.29]                | Meningitis<br>[0.41]         | Vit A<br>[0.39]              |
| Kwale      | HIV<br>[17.37]                  | Diarrhea<br>[0.85] | Vit A<br>[0.95]      | Neonatal<br>[1.84]             | Malaria<br>[15.17]            | iNTS<br>[2.81]                | Typh +<br>Paratyph<br>[3.21]  | Congenital<br>[0.67]         | LRI<br>[0.37]                | Dermatitis<br>[1.12]         |
| Laikipia   | HIV<br>[51.49]                  | Neonatal<br>[2.01] | Diarrhea<br>[1.71]   | Vit A<br>[0.94]                | Dermatitis<br>[1.14]          | Congenital<br>[0.61]          | Typh +<br>Paratyph<br>[17.58] | Asthma<br>[0.74]             | LRI<br>[0.33]                | Epilepsy<br>[0.85]           |
| Lamu       | Conflict<br>Terror<br>[1064.98] | Diarrhea<br>[0.89] | LRI<br>[0.5]         | Neonatal<br>[1.6]              | Congenital<br>[0.77]          | Vit A<br>[0.72]               | HIV<br>[9.39]                 | Typh +<br>Paratyph<br>[3.39] | Meningitis<br>[0.66]         | iNTS<br>[2.39]               |
| Machakos   | HIV<br>[31.21]                  | Diarrhea<br>[1.51] | Neonatal<br>[1.95]   | Typh +<br>Paratyph<br>[10.29]  | Congenital<br>[0.65]          | Dermatitis<br>[1.13]          | Vit A<br>[0.66]               | LRI<br>[0.38]                | iNTS<br>[2.64]               | Meningitis<br>[0.56]         |
| Makueni    | HIV<br>[60.19]                  | Diarrhea<br>[0.9]  | Neonatal<br>[2.0]    | Typh +<br>Paratyph<br>[3.59]   | Dermatitis<br>[1.12]          | Vit A<br>[0.57]               | Congenital<br>[0.55]          | Asthma<br>[0.64]             | iNTS<br>[1.54]               | LRI<br>[0.19]                |
| Mandera    | Diarrhea<br>[0.48]              | Vit A<br>[0.87]    | HIV<br>[16.81]       | Iron<br>[0.55]                 | LRI<br>[0.29]                 | iNTS<br>[1.41]                | Neonatal<br>[2.19]            | Typh +<br>Paratyph<br>[0.58] | Meningitis<br>[0.37]         | Congenital<br>[0.6]          |
| Marsabit   | HIV<br>[24.64]                  | Diarrhea<br>[0.67] | Neonatal<br>[2.69]   | Vit A<br>[0.59]                | iNTS<br>[1.37]                | Congenital<br>[0.59]          | LRI<br>[0.24]                 | Typh +<br>Paratyph<br>[0.65] | Dermatitis<br>[1.13]         | Meningitis<br>[0.34]         |
| Meru       | HIV<br>[29.78]                  | Diarrhea<br>[1.72] | Neonatal<br>[1.94]   | LRI<br>[0.59]                  | Congenital<br>[0.77]          | Vit A<br>[0.85]               | Meningitis<br>[0.82]          | Typh +<br>Paratyph<br>[7.91] | Dermatitis<br>[1.13]         | Road Inj<br>[0.33]           |
| Migori     | HIV<br>[60.36]                  | Diarrhea<br>[1.24] | LRI<br>[0.63]        | Vit A<br>[0.98]                | Malaria<br>[8.96]             | iNTS<br>[3.52]                | Meningitis<br>[0.75]          | Congenital<br>[0.87]         | Road Inj<br>[0.44]           | Typh +<br>Paratyph<br>[2.26] |

**eFigure 7d. Leading ten causes of DALYs with the ratio of observed DALYs to DALYs expected on the basis of Socio-Demographic Index alone in 2017, 5-9 years, both sexes combined.** The top ten causes contributing to DALYs are listed globally, by socio-demographic quintile, and then by GBD superregion, region, country, and subnationally where modeled. For each cell, the ratio of observed DALYs to DALYs expected on the basis of socio-demographic index (SDI) alone are listed. Abbreviations: DALY=disability-adjusted life year, GBD=Global Burden of Disease.

Values shown in brackets represent the ratio of observed DALYs to predicted DALYs on the basis of Socio-Demographic Index (SDI), rounded to two (2) digits. Color ranges (shown below) were calculated to place a roughly equal number of cells into each bin.

| COLOR KEY:   |                    | [0.0-0.62]           | [0.62-0.79]          | [0.79-0.89]                | [0.89-0.97]                | [0.97-1.07]                 | [1.07-1.26]                | [1.26-1.44]               | [1.44-2.32]                | 2.32+                |
|--------------|--------------------|----------------------|----------------------|----------------------------|----------------------------|-----------------------------|----------------------------|---------------------------|----------------------------|----------------------|
|              | 1                  | 2                    | 3                    | 4                          | 5                          | 6                           | 7                          | 8                         | 9                          | 10                   |
| Mombasa      | Neonatal<br>[1.57] | Diarrhea<br>[1.78]   | Congenital<br>[0.77] | Typh + Paratyph<br>[33.74] | LRI<br>[0.65]              | Dermatitis<br>[1.14]        | HIV<br>[12.02]             | Vit A<br>[0.86]           | Meningitis<br>[1.07]       | iNTS<br>[4.44]       |
| Murang'a     | HIV<br>[34.18]     | Diarrhea<br>[2.0]    | Neonatal<br>[1.95]   | Congenital<br>[0.71]       | LRI<br>[0.49]              | Typh + Paratyph<br>[12.01]  | Dermatitis<br>[1.13]       | Meningitis<br>[0.76]      | Road Inj<br>[0.28]         | Vit A<br>[0.52]      |
| Nairobi      | Neonatal<br>[1.73] | Dermatitis<br>[1.37] | Congenital<br>[0.92] | Diarrhea<br>[2.67]         | LRI<br>[1.63]              | Typh + Paratyph<br>[293.31] | Vit A<br>[1.24]            | Road Inj<br>[0.49]        | Meningitis<br>[2.81]       | Asthma<br>[0.83]     |
| Nakuru       | HIV<br>[26.41]     | Diarrhea<br>[2.0]    | Neonatal<br>[1.82]   | Congenital<br>[0.79]       | LRI<br>[0.63]              | Typh + Paratyph<br>[19.04]  | Dermatitis<br>[1.14]       | Meningitis<br>[0.95]      | Vit A<br>[0.7]             | Epilepsy<br>[1.29]   |
| Nandi        | HIV<br>[25.02]     | Neonatal<br>[2.05]   | Diarrhea<br>[1.17]   | Vit A<br>[0.88]            | Typh + Paratyph<br>[6.63]  | Congenital<br>[0.62]        | Dermatitis<br>[1.12]       | iNTS<br>[3.07]            | LRI<br>[0.31]              | Asthma<br>[0.68]     |
| Narok        | Diarrhea<br>[0.72] | Vit A<br>[0.9]       | Neonatal<br>[2.59]   | Typh + Paratyph<br>[1.57]  | iNTS<br>[2.04]             | HIV<br>[7.53]               | Congenital<br>[0.61]       | LRI<br>[0.27]             | Dermatitis<br>[1.12]       | Meningitis<br>[0.37] |
| Nyamira      | Diarrhea<br>[2.51] | HIV<br>[23.47]       | Neonatal<br>[1.77]   | LRI<br>[0.73]              | iNTS<br>[5.97]             | Congenital<br>[0.81]        | Typh + Paratyph<br>[18.61] | Meningitis<br>[1.09]      | Road Inj<br>[0.39]         | Dermatitis<br>[1.14] |
| Nyandarua    | HIV<br>[30.45]     | Diarrhea<br>[2.44]   | Neonatal<br>[2.06]   | LRI<br>[0.91]              | Congenital<br>[0.92]       | Meningitis<br>[1.31]        | Typh + Paratyph<br>[15.94] | Road Inj<br>[0.42]        | Vit A<br>[0.82]            | Dermatitis<br>[1.14] |
| Nyeri        | HIV<br>[42.48]     | Diarrhea<br>[2.15]   | Neonatal<br>[1.92]   | LRI<br>[0.8]               | Congenital<br>[0.84]       | Meningitis<br>[1.24]        | Road Inj<br>[0.4]          | Dermatitis<br>[1.14]      | Typh + Paratyph<br>[19.93] | Asthma<br>[0.76]     |
| Samburu      | HIV<br>[42.12]     | Diarrhea<br>[0.49]   | Neonatal<br>[3.02]   | iNTS<br>[1.1]              | Vit A<br>[0.35]            | Dermatitis<br>[1.13]        | Congenital<br>[0.52]       | Typh + Paratyph<br>[0.45] | Meningitis<br>[0.23]       | LRI<br>[0.15]        |
| Siaya        | Malaria<br>[44.53] | HIV<br>[18.75]       | Diarrhea<br>[1.11]   | Vit A<br>[0.87]            | iNTS<br>[3.58]             | Congenital<br>[0.75]        | LRI<br>[0.44]              | Typh + Paratyph<br>[3.2]  | Neonatal<br>[1.22]         | Meningitis<br>[0.57] |
| TaitaTaveta  | HIV<br>[42.95]     | Diarrhea<br>[1.49]   | Neonatal<br>[1.79]   | Congenital<br>[0.77]       | LRI<br>[0.59]              | Typh + Paratyph<br>[13.71]  | Dermatitis<br>[1.14]       | Meningitis<br>[0.85]      | Road Inj<br>[0.29]         | iNTS<br>[2.99]       |
| TanaRiver    | HIV<br>[32.01]     | Vit A<br>[1.31]      | Iron<br>[1.08]       | Diarrhea<br>[0.58]         | LRI<br>[0.43]              | Neonatal<br>[2.16]          | Congenital<br>[0.75]       | Typh + Paratyph<br>[1.33] | iNTS<br>[2.01]             | Meningitis<br>[0.52] |
| TharakaNithi | Diarrhea<br>[2.32] | Neonatal<br>[1.52]   | LRI<br>[0.64]        | Congenital<br>[0.78]       | Typh + Paratyph<br>[12.97] | Dermatitis<br>[1.13]        | Meningitis<br>[0.91]       | Road Inj<br>[0.33]        | Vit A<br>[0.64]            | iNTS<br>[2.91]       |
| TransNzoia   | HIV<br>[38.87]     | Diarrhea<br>[1.37]   | Neonatal<br>[1.95]   | Vit A<br>[1.0]             | Congenital<br>[0.6]        | Dermatitis<br>[1.12]        | Typh + Paratyph<br>[5.34]  | iNTS<br>[2.48]            | LRI<br>[0.31]              | Meningitis<br>[0.48] |
| Turkana      | HIV<br>[61.45]     | Diarrhea<br>[0.63]   | Vit A<br>[0.7]       | Neonatal<br>[2.63]         | iNTS<br>[1.25]             | Congenital<br>[0.62]        | Meningitis<br>[0.34]       | LRI<br>[0.22]             | PEM<br>[0.64]              | Dermatitis<br>[1.12] |
| UasinGishu   | HIV<br>[26.68]     | Diarrhea<br>[1.93]   | Neonatal<br>[1.83]   | Dermatitis<br>[1.66]       | Vit A<br>[0.96]            | Congenital<br>[0.69]        | Typh + Paratyph<br>[17.51] | LRI<br>[0.47]             | Meningitis<br>[0.74]       | Asthma<br>[0.72]     |
| Vihiga       | Diarrhea<br>[1.43] | Vit A<br>[1.05]      | LRI<br>[0.63]        | Neonatal<br>[1.84]         | iNTS<br>[3.85]             | Congenital<br>[0.81]        | Typh + Paratyph<br>[5.2]   | Malaria<br>[25.05]        | Meningitis<br>[0.77]       | HIV<br>[8.69]        |
| Wajir        | Diarrhea<br>[0.55] | Neonatal<br>[2.97]   | Vit A<br>[0.41]      | iNTS<br>[1.21]             | LRI<br>[0.24]              | Congenital<br>[0.67]        | Typh + Paratyph<br>[0.36]  | Meningitis<br>[0.35]      | Dermatitis<br>[1.12]       | Measles<br>[0.11]    |
| WestPokot    | Diarrhea<br>[0.77] | Neonatal<br>[2.49]   | HIV<br>[10.79]       | Leish<br>[10.31]           | Vit A<br>[0.62]            | iNTS<br>[1.66]              | Congenital<br>[0.55]       | Dermatitis<br>[1.12]      | Typh + Paratyph<br>[0.88]  | LRI<br>[0.2]         |
| Madagascar   | Diarrhea<br>[0.93] | PEM<br>[2.1]         | Iron<br>[0.96]       | LRI<br>[0.47]              | Vit A<br>[0.71]            | Congenital<br>[0.94]        | Malaria<br>[0.87]          | Road Inj<br>[0.29]        | Asthma<br>[1.06]           | Dermatitis<br>[1.17] |

**eFigure 7d. Leading ten causes of DALYs with the ratio of observed DALYs to DALYs expected on the basis of Socio-Demographic Index alone in 2017, 5-9 years, both sexes combined.** The top ten causes contributing to DALYs are listed globally, by socio-demographic quintile, and then by GBD superregion, region, country, and subnationally where modeled. For each cell, the ratio of observed DALYs to DALYs expected on the basis of socio-demographic index (SDI) alone are listed. Abbreviations: DALY=disability-adjusted life year, GBD=Global Burden of Disease.

Values shown in brackets represent the ratio of observed DALYs to predicted DALYs on the basis of Socio-Demographic Index (SDI), rounded to two (2) digits. Color ranges (shown below) were calculated to place a roughly equal number of cells into each bin.

| COLOR KEY:                  |                               | [0.0-0.62]                    | [0.62-0.79]          | [0.79-0.89]                  | [0.89-0.97]          | [0.97-1.07]                   | [1.07-1.26]                  | [1.26-1.44]          | [1.44-2.32]          | 2.32+                       |
|-----------------------------|-------------------------------|-------------------------------|----------------------|------------------------------|----------------------|-------------------------------|------------------------------|----------------------|----------------------|-----------------------------|
|                             | 1                             | 2                             | 3                    | 4                            | 5                    | 6                             | 7                            | 8                    | 9                    | 10                          |
| Malawi                      | HIV<br>[76.22]                | Iron<br>[1.16]                | Malaria<br>[2.28]    | Diarrhea<br>[0.58]           | Vit A<br>[0.86]      | LRI<br>[0.33]                 | Congenital<br>[0.62]         | Meningitis<br>[0.39] | Road Inj<br>[0.29]   | Dermatitis<br>[1.17]        |
| Mozambique                  | HIV<br>[116.58]               | Malaria<br>[3.76]             | Iron<br>[1.06]       | Diarrhea<br>[0.55]           | Vit A<br>[0.87]      | LRI<br>[0.4]                  | Typh +<br>Paratyph<br>[0.97] | Congenital<br>[0.72] | Road Inj<br>[0.27]   | Asthma<br>[0.89]            |
| Rwanda                      | Iron<br>[0.78]                | Diarrhea<br>[0.54]            | Vit A<br>[0.75]      | Road Inj<br>[0.48]           | Malaria<br>[4.42]    | LRI<br>[0.37]                 | HIV<br>[8.25]                | Asthma<br>[1.14]     | Congenital<br>[0.61] | Neonatal<br>[1.34]          |
| Somalia                     | Measles<br>[0.46]             | Conflict<br>Terror<br>[36.17] | Diarrhea<br>[0.45]   | Vit A<br>[0.81]              | Road Inj<br>[0.64]   | Iron<br>[0.72]                | LRI<br>[0.42]                | Whooping<br>[1.78]   | Meningitis<br>[0.48] | Dermatitis<br>[1.16]        |
| S Sudan                     | Conflict<br>Terror<br>[78.21] | Diarrhea<br>[0.64]            | Malaria<br>[0.72]    | Iron<br>[0.89]               | LRI<br>[0.47]        | Leish<br>[4.18]               | Vit A<br>[0.62]              | Road Inj<br>[0.44]   | Meningitis<br>[0.47] | Measles<br>[0.21]           |
| Tanzania                    | HIV<br>[26.53]                | Iron<br>[1.17]                | Diarrhea<br>[0.69]   | Malaria<br>[6.92]            | LRI<br>[0.51]        | Vit A<br>[0.75]               | Congenital<br>[0.65]         | Asthma<br>[1.11]     | Neonatal<br>[1.28]   | Hemog<br>[1.61]             |
| Uganda                      | HIV<br>[76.87]                | Malaria<br>[8.9]              | Diarrhea<br>[0.61]   | Vit A<br>[0.73]              | Iron<br>[0.67]       | Road Inj<br>[1.31]            | LRI<br>[0.33]                | Neonatal<br>[1.31]   | Dermatitis<br>[1.07] | Asthma<br>[0.94]            |
| Zambia                      | HIV<br>[60.76]                | Diarrhea<br>[1.34]            | Vit A<br>[1.5]       | Malaria<br>[38.76]           | Iron<br>[0.77]       | LRI<br>[0.55]                 | Congenital<br>[0.69]         | Meningitis<br>[0.71] | Road Inj<br>[0.38]   | Dermatitis<br>[1.16]        |
| Southern Sub-Saharan Africa | HIV<br>[137.73]               | Road Inj<br>[0.93]            | Diarrhea<br>[2.99]   | Vit A<br>[1.77]              | Dermatitis<br>[1.31] | LRI<br>[1.28]                 | Neonatal<br>[1.02]           | Iron<br>[1.16]       | TB<br>[17.2]         | Congenital<br>[0.6]         |
|                             | Diarrhea<br>[4.43]            | Vit A<br>[2.36]               | Iron<br>[2.06]       | Road Inj<br>[0.94]           | Neonatal<br>[1.26]   | Dermatitis<br>[1.3]           | LRI<br>[1.31]                | Congenital<br>[0.47] | HIV<br>[13.29]       | Asthma<br>[0.66]            |
|                             | HIV<br>[116.35]               | Road Inj<br>[1.51]            | Diarrhea<br>[2.25]   | TB<br>[1.02]                 | TB<br>[6.88]         | Vit A<br>[1.5]                | Iron<br>[1.06]               | Dermatitis<br>[1.39] | Drown<br>[0.57]      | Meningitis<br>[0.72]        |
|                             | HIV<br>[84.09]                | Diarrhea<br>[3.45]            | Road Inj<br>[0.93]   | Iron<br>[1.71]               | Dermatitis<br>[1.36] | Neonatal<br>[1.07]            | LRI<br>[0.96]                | Vit A<br>[1.09]      | TB<br>[9.24]         | Congenital<br>[0.44]        |
| S Africa                    | HIV<br>[173.82]               | Road Inj<br>[1.09]            | Vit A<br>[1.89]      | Dermatitis<br>[1.27]         | Neonatal<br>[1.05]   | Diarrhea<br>[2.52]            | Congenital<br>[0.68]         | LRI<br>[1.21]        | Iron<br>[0.96]       | Violence<br>[3.11]          |
| Swaziland                   | HIV<br>[181.37]               | Diarrhea<br>[4.14]            | Road Inj<br>[1.42]   | Iron<br>[1.65]               | Vit A<br>[1.75]      | LRI<br>[1.22]                 | TB<br>[9.19]                 | Dermatitis<br>[1.4]  | Neonatal<br>[0.84]   | Drown<br>[0.57]             |
| Zimbabwe                    | HIV<br>[50.23]                | Diarrhea<br>[1.0]             | TB<br>[4.56]         | LRI<br>[0.69]                | Iron<br>[0.82]       | Vit A<br>[0.96]               | Road Inj<br>[0.45]           | Dermatitis<br>[1.39] | PEM<br>[2.67]        | Drown<br>[0.53]             |
| Western Sub-Saharan Africa  | Malaria<br>[48.76]            | Iron<br>[1.97]                | Vit A<br>[1.35]      | Diarrhea<br>[0.81]           | LRI<br>[0.53]        | iNTS<br>[3.31]                | Meningitis<br>[0.66]         | Road Inj<br>[0.4]    | HIV<br>[8.62]        | Hemog<br>[2.12]             |
|                             | Malaria<br>[10.05]            | Vit A<br>[1.13]               | Iron<br>[1.03]       | Diarrhea<br>[0.54]           | Road Inj<br>[0.57]   | iNTS<br>[1.93]                | LRI<br>[0.32]                | HIV<br>[6.74]        | Congenital<br>[0.52] | Meningitis<br>[0.34]        |
|                             | Malaria<br>[2.56]             | Iron<br>[1.6]                 | Vit A<br>[0.97]      | Typh +<br>Paratyph<br>[0.94] | Diarrhea<br>[0.33]   | Hemog<br>[1.74]               | iNTS<br>[1.52]               | LRI<br>[0.31]        | Road Inj<br>[0.3]    | Meningitis<br>[0.37]        |
|                             | Malaria<br>[157.47]           | HIV<br>[24.39]                | Iron<br>[1.55]       | Vit A<br>[1.57]              | Diarrhea<br>[1.0]    | LRI<br>[0.53]                 | Road Inj<br>[0.37]           | iNTS<br>[2.68]       | Congenital<br>[0.57] | Meningitis<br>[0.57]        |
| Cape Verde                  | Iron<br>[1.64]                | Neonatal<br>[1.41]            | Dermatitis<br>[0.97] | Diarrhea<br>[0.65]           | Congenital<br>[0.44] | Drown<br>[0.37]               | Epilepsy<br>[0.98]           | Asthma<br>[0.63]     | HIV<br>[6.17]        | Conduct<br>[0.94]           |
| Chad                        | Iron<br>[1.92]                | Malaria<br>[0.8]              | Diarrhea<br>[0.6]    | Vit A<br>[0.88]              | LRI<br>[0.49]        | Road Inj<br>[0.47]            | Meningitis<br>[0.54]         | iNTS<br>[1.22]       | HIV<br>[11.5]        | Typh +<br>Paratyph<br>[0.4] |
| Cote d'Ivoire               | Malaria<br>[19.42]            | Iron<br>[1.58]                | Vit A<br>[1.34]      | Diarrhea<br>[0.58]           | iNTS<br>[3.0]        | LRI<br>[0.48]                 | Road Inj<br>[0.4]            | Congenital<br>[0.63] | HIV<br>[7.33]        | Meningitis<br>[0.46]        |
| Gambia                      | Iron<br>[1.52]                | Vit A<br>[1.4]                | Hemog<br>[4.42]      | Diarrhea<br>[0.53]           | HIV<br>[9.85]        | LRI<br>[0.4]                  | Neonatal<br>[1.64]           | Meningitis<br>[0.5]  | Road Inj<br>[0.3]    | Congenital<br>[0.53]        |
| Ghana                       | Malaria<br>[435.42]           | Iron<br>[2.18]                | Vit A<br>[2.23]      | HIV<br>[20.22]               | Diarrhea<br>[1.17]   | Typh +<br>Paratyph<br>[18.42] | Road Inj<br>[0.44]           | Meningitis<br>[1.1]  | Hemog<br>[3.04]      | LRI<br>[0.52]               |
| Guinea                      | Malaria<br>[4.23]             | Iron<br>[1.16]                | Vit A<br>[0.93]      | iNTS<br>[2.26]               | Diarrhea<br>[0.37]   | LRI<br>[0.4]                  | HIV<br>[11.09]               | Road Inj<br>[0.35]   | Meningitis<br>[0.42] | Congenital<br>[0.59]        |
| Guinea-Bissau               | HIV<br>[38.56]                | Diarrhea<br>[0.84]            | Iron<br>[1.33]       | Hemog<br>[4.11]              | Vit A<br>[1.13]      | Measles<br>[0.97]             | LRI<br>[0.46]                | Meningitis<br>[0.53] | Congenital<br>[0.67] | Road Inj<br>[0.34]          |
| Liberia                     | Malaria<br>[2.47]             | Iron<br>[1.47]                | Diarrhea<br>[0.62]   | Vit A<br>[0.84]              | Oncho<br>[211.61]    | Measles<br>[0.5]              | Hemog<br>[1.85]              | HIV<br>[9.78]        | iNTS<br>[1.48]       | LRI<br>[0.28]               |
| Mali                        | Malaria<br>[1.54]             | Iron<br>[1.82]                | Vit A<br>[1.11]      | Diarrhea<br>[0.53]           | iNTS<br>[2.86]       | Meningitis<br>[0.56]          | Road Inj<br>[0.38]           | HIV<br>[10.79]       | LRI<br>[0.25]        | Hemog<br>[1.09]             |

**eFigure 7d. Leading ten causes of DALYs with the ratio of observed DALYs to DALYs expected on the basis of Socio-Demographic Index alone in 2017, 5-9 years, both sexes combined.** The top ten causes contributing to DALYs are listed globally, by socio-demographic quintile, and then by GBD superregion, region, country, and subnationally where modeled. For each cell, the ratio of observed DALYs to DALYs expected on the basis of socio-demographic index (SDI) alone are listed. Abbreviations: DALY=disability-adjusted life year, GBD=Global Burden of Disease.

Values shown in brackets represent the ratio of observed DALYs to predicted DALYs on the basis of Socio-Demographic Index (SDI), rounded to two (2) digits. Color ranges (shown below) were calculated to place a roughly equal number of cells into each bin.

| COLOR KEY:        |                    | [0.0-0.62]         | [0.62-0.79]     | [0.79-0.89]          | [0.89-0.97]          | [0.97-1.07]        | [1.07-1.26]          | [1.26-1.44]          | [1.44-2.32]          | 2.32+                        |
|-------------------|--------------------|--------------------|-----------------|----------------------|----------------------|--------------------|----------------------|----------------------|----------------------|------------------------------|
|                   | 1                  | 2                  | 3               | 4                    | 5                    | 6                  | 7                    | 8                    | 9                    | 10                           |
| Mauritania        | Iron<br>[1.41]     | Diarrhea<br>[1.11] | Vit A<br>[1.25] | Road Inj<br>[0.53]   | LRI<br>[0.46]        | Neonatal<br>[1.24] | Congenital<br>[0.51] | Meningitis<br>[0.51] | Dermatitis<br>[0.95] | Asthma<br>[0.78]             |
| Niger             | Malaria<br>[0.78]  | Iron<br>[1.3]      | Vit A<br>[0.7]  | Diarrhea<br>[0.33]   | iNTS<br>[1.44]       | LRI<br>[0.32]      | Meningitis<br>[0.4]  | Road Inj<br>[0.26]   | Congenital<br>[0.55] | Hemog<br>[0.7]               |
| Nigeria           | Malaria<br>[184.1] | Iron<br>[2.58]     | Vit A<br>[1.56] | Diarrhea<br>[1.15]   | LRI<br>[0.76]        | iNTS<br>[5.18]     | Measles<br>[6.38]    | Meningitis<br>[0.98] | Road Inj<br>[0.43]   | Hemog<br>[2.72]              |
| Sao Tome Principe | Vit A<br>[1.53]    | Iron<br>[1.23]     | LRI<br>[0.74]   | Neonatal<br>[1.24]   | Congenital<br>[0.68] | Diarrhea<br>[0.61] | Road Inj<br>[0.34]   | Other MN<br>[2.47]   | Dermatitis<br>[0.95] | Typh +<br>Paratyph<br>[4.29] |
| Senegal           | Iron<br>[1.45]     | Diarrhea<br>[0.65] | Vit A<br>[0.99] | Meningitis<br>[0.48] | LRI<br>[0.3]         | Hemog<br>[1.67]    | Neonatal<br>[1.54]   | Malaria<br>[1.52]    | Congenital<br>[0.53] | Road Inj<br>[0.27]           |
| Sierra Leone      | Malaria<br>[11.98] | Iron<br>[1.68]     | Vit A<br>[1.09] | Diarrhea<br>[0.58]   | LRI<br>[0.46]        | iNTS<br>[1.96]     | Meningitis<br>[0.5]  | Road Inj<br>[0.35]   | Hemog<br>[1.59]      | Congenital<br>[0.6]          |
| Togo              | Malaria<br>[32.37] | Vit A<br>[1.15]    | Iron<br>[1.02]  | HIV<br>[15.28]       | Diarrhea<br>[0.61]   | iNTS<br>[3.09]     | Hemog<br>[2.38]      | LRI<br>[0.3]         | Neonatal<br>[1.12]   | Congenital<br>[0.49]         |

**eFigure 7e. Leading ten causes of DALYs with the ratio of observed DALYs to DALYs expected on the basis of Socio-Demographic Index alone in 2017, 10-19 years, both sexes combined.** The top ten causes contributing to DALYs are listed globally, by socio-demographic quintile, and then by GBD superregion, region, country, and subnationally where modeled. For each cell, the ratio of observed DALYs to DALYs expected on the basis of socio-demographic index (SDI) alone are listed. Abbreviations: DALY=disability-adjusted life year, GBD=Global Burden of Disease.

Values shown in brackets represent the ratio of observed DALYs to predicted DALYs on the basis of Socio-Demographic Index (SDI), rounded to two (2) digits. Color ranges (shown below) were calculated to place a roughly equal number of cells into each bin.

| COLOR KEY:                                       |                     | [0.0-0.73]          | [0.73-0.88]          | [0.88-0.95]         | [0.95-1.01]          | [1.01-1.09]          | [1.09-1.26]                                 | [1.26-1.55]          | [1.55-2.09]            | 2.09+                  |
|--------------------------------------------------|---------------------|---------------------|----------------------|---------------------|----------------------|----------------------|---------------------------------------------|----------------------|------------------------|------------------------|
|                                                  | 1                   | 2                   | 3                    | 4                   | 5                    | 6                    | 7                                           | 8                    | 9                      | 10                     |
| Global                                           | Road Inj<br>[0.66]  | Headaches<br>[0.85] | Iron<br>[1.82]       | Neonatal<br>[1.09]  | Conduct<br>[0.9]     | Anxiety<br>[0.88]    | HIV<br>[25.29]<br>Typh + Paratyph<br>[3.25] | Depression<br>[0.9]  | Back Pain<br>[0.82]    | Diarrhea<br>[2.7]      |
| Low SDI                                          | Iron<br>[1.17]      | HIV<br>[18.81]      | Road Inj<br>[0.53]   | Headaches<br>[0.92] | Diarrhea<br>[1.02]   | Malaria<br>[6.45]    |                                             | Conduct<br>[0.9]     | Neonatal<br>[1.43]     | Anxiety<br>[0.94]      |
| Low-middle SDI                                   | Iron<br>[1.53]      | Road Inj<br>[0.7]   | Headaches<br>[0.95]  | Neonatal<br>[1.15]  | HIV<br>[16.25]       | Conduct<br>[0.89]    | Diarrhea<br>[1.64]                          | Anxiety<br>[0.92]    | Back Pain<br>[0.91]    | Malaria<br>[101.42]    |
| Middle SDI                                       | Road Inj<br>[0.68]  | Headaches<br>[0.81] | Neonatal<br>[1.21]   | Violence<br>[1.4]   | Conduct<br>[0.88]    | Anxiety<br>[0.78]    | Back Pain<br>[0.75]                         | Drown<br>[0.86]      | Iron<br>[1.1]          | Depression<br>[0.73]   |
| High-middle SDI                                  | Road Inj<br>[0.8]   | Headaches<br>[0.79] | Neonatal<br>[1.25]   | Back Pain<br>[0.82] | Anxiety<br>[0.76]    | Conduct<br>[0.95]    | Depression<br>[0.87]                        | Congenital<br>[0.98] | Self Harm<br>[0.68]    | Violence<br>[2.61]     |
| High SDI                                         | Headaches<br>[0.93] | Anxiety<br>[1.16]   | Depression<br>[1.33] | Back Pain<br>[1.05] | Road Inj<br>[0.49]   | Drugs<br>[3.06]      | Conduct<br>[0.98]                           | Neonatal<br>[0.89]   | Acne<br>[1.63]         | Self Harm<br>[0.68]    |
| Central Europe, Eastern Europe, and Central Asia | Headaches<br>[0.9]  | Road Inj<br>[0.61]  | Neonatal<br>[1.38]   | Self Harm<br>[1.19] | Conduct<br>[1.03]    | Falls<br>[1.74]      | Back Pain<br>[0.8]                          | Anxiety<br>[0.62]    | Depression<br>[0.71]   | Congenital<br>[0.96]   |
| Central Asia                                     | Headaches<br>[0.88] | Iron<br>[2.39]      | Self Harm<br>[1.2]   | Conduct<br>[0.98]   | Road Inj<br>[0.46]   | Epilepsy<br>[1.85]   | Neonatal<br>[0.93]                          | LRI<br>[2.27]        | Back Pain<br>[0.74]    | Depression<br>[0.79]   |
| Armenia                                          | Headaches<br>[0.86] | Conduct<br>[1.0]    | Neonatal<br>[0.98]   | Iron<br>[1.82]      | Back Pain<br>[0.74]  | Congenital<br>[0.94] | Depression<br>[0.71]                        | Road Inj<br>[0.28]   | Anxiety<br>[0.57]      | Falls<br>[1.21]        |
| Azerbaijan                                       | Headaches<br>[0.87] | Conduct<br>[1.0]    | Neonatal<br>[0.89]   | Iron<br>[1.74]      | Epilepsy<br>[1.79]   | Back Pain<br>[0.72]  | LRI<br>[2.38]                               | Congenital<br>[0.9]  | Road Inj<br>[0.29]     | Falls<br>[1.31]        |
| Georgia                                          | Road Inj<br>[0.7]   | Headaches<br>[0.87] | Conduct<br>[1.0]     | Neonatal<br>[0.97]  | Depression<br>[0.72] | Back Pain<br>[0.64]  | Congenital<br>[0.86]                        | Anxiety<br>[0.58]    | Falls<br>[1.23]        | Iron<br>[1.27]         |
| Kazakhstan                                       | Self Harm<br>[1.8]  | Headaches<br>[0.86] | Road Inj<br>[0.6]    | Conduct<br>[1.01]   | Neonatal<br>[1.01]   | Depression<br>[0.91] | Back Pain<br>[0.75]                         | Iron<br>[2.14]       | Congenital<br>[0.98]   | Drown<br>[1.39]        |
| Kyrgyzstan                                       | Headaches<br>[0.9]  | Iron<br>[1.86]      | Self Harm<br>[1.24]  | Road Inj<br>[0.5]   | Conduct<br>[0.97]    | Neonatal<br>[1.03]   | Epilepsy<br>[1.46]                          | Depression<br>[0.84] | Back Pain<br>[0.78]    | Congenital<br>[0.87]   |
| Mongolia                                         | Self Harm<br>[2.02] | Headaches<br>[0.88] | Road Inj<br>[0.65]   | Conduct<br>[0.98]   | Falls<br>[2.21]      | Neonatal<br>[0.98]   | Depression<br>[0.96]                        | Congenital<br>[1.0]  | Iron<br>[1.27]         | Back Pain<br>[0.74]    |
| Tajikistan                                       | Headaches<br>[0.93] | LRI<br>[1.55]       | Epilepsy<br>[1.98]   | Drown<br>[0.95]     | Conduct<br>[0.97]    | Iron<br>[0.94]       | Neonatal<br>[1.04]                          | Congenital<br>[0.99] | Falls<br>[2.11]        | Road Inj<br>[0.33]     |
| Turkmenistan                                     | Headaches<br>[0.87] | Conduct<br>[0.99]   | Self Harm<br>[1.05]  | Iron<br>[1.83]      | LRI<br>[2.55]        | Epilepsy<br>[1.78]   | Neonatal<br>[0.83]                          | Cirrhosis<br>[8.37]  | Back Pain<br>[0.71]    | Congenital<br>[0.94]   |
| Uzbekistan                                       | Iron<br>[2.73]      | Headaches<br>[0.89] | Self Harm<br>[1.41]  | LRI<br>[2.26]       | Conduct<br>[0.97]    | Road Inj<br>[0.46]   | Epilepsy<br>[1.88]                          | Neonatal<br>[0.91]   | Back Pain<br>[0.76]    | Depression<br>[0.81]   |
| Central Europe                                   | Headaches<br>[0.87] | Neonatal<br>[1.43]  | Falls<br>[1.95]      | Road Inj<br>[0.54]  | Back Pain<br>[0.91]  | Conduct<br>[1.03]    | Anxiety<br>[0.69]                           | Congenital<br>[1.0]  | Self Harm<br>[0.63]    | Depression<br>[0.59]   |
| Albania                                          | Headaches<br>[0.9]  | Back Pain<br>[1.13] | Falls<br>[2.38]      | Neonatal<br>[1.19]  | Conduct<br>[0.97]    | Road Inj<br>[0.45]   | Anxiety<br>[0.79]                           | Congenital<br>[0.96] | Depression<br>[0.65]   | Epilepsy<br>[1.17]     |
| Bosnia                                           | Headaches<br>[0.89] | Neonatal<br>[1.42]  | Falls<br>[2.31]      | Conduct<br>[0.98]   | Back Pain<br>[0.92]  | Road Inj<br>[0.4]    | Anxiety<br>[0.77]                           | Congenital<br>[0.91] | Depression<br>[0.66]   | Self Harm<br>[0.54]    |
| Bulgaria                                         | Headaches<br>[0.87] | Road Inj<br>[0.61]  | Falls<br>[2.09]      | Neonatal<br>[1.26]  | Conduct<br>[1.02]    | Back Pain<br>[0.86]  | Anxiety<br>[0.74]                           | Congenital<br>[1.14] | Depression<br>[0.61]   | Self Harm<br>[0.56]    |
| Croatia                                          | Headaches<br>[0.88] | Neonatal<br>[1.55]  | Road Inj<br>[0.57]   | Conduct<br>[1.03]   | Back Pain<br>[0.89]  | Anxiety<br>[0.69]    | Falls<br>[1.2]                              | Depression<br>[0.71] | Congenital<br>[0.99]   | Self Harm<br>[0.61]    |
| Czech                                            | Headaches<br>[0.87] | Falls<br>[2.17]     | Back Pain<br>[1.01]  | Conduct<br>[1.06]   | Road Inj<br>[0.49]   | Neonatal<br>[0.93]   | Anxiety<br>[0.67]                           | Depression<br>[0.65] | Congenital<br>[0.89]   | Self Harm<br>[0.55]    |
| Hungary                                          | Headaches<br>[0.88] | Neonatal<br>[1.37]  | Back Pain<br>[1.01]  | Falls<br>[1.9]      | Conduct<br>[1.03]    | Anxiety<br>[0.69]    | Road Inj<br>[0.41]                          | Congenital<br>[1.16] | Depression<br>[0.62]   | Self Harm<br>[0.56]    |
| Macedonia                                        | Headaches<br>[0.88] | Neonatal<br>[1.38]  | Falls<br>[2.06]      | Road Inj<br>[0.5]   | Conduct<br>[1.0]     | Anxiety<br>[0.73]    | Back Pain<br>[0.69]                         | Congenital<br>[0.89] | Depression<br>[0.61]   | Iron<br>[1.74]         |
| Montenegro                                       | Headaches<br>[0.88] | Neonatal<br>[1.35]  | Falls<br>[1.95]      | Back Pain<br>[0.96] | Conduct<br>[1.02]    | Road Inj<br>[0.48]   | Anxiety<br>[0.71]                           | Depression<br>[0.64] | Congenital<br>[0.87]   | Self Harm<br>[0.47]    |
| Poland                                           | Headaches<br>[0.88] | Neonatal<br>[1.59]  | Road Inj<br>[0.61]   | Falls<br>[1.87]     | Conduct<br>[1.04]    | Back Pain<br>[0.74]  | Anxiety<br>[0.68]                           | Self Harm<br>[0.89]  | Congenital<br>[1.04]   | Depression<br>[0.52]   |
| Romania                                          | Headaches<br>[0.87] | Neonatal<br>[1.47]  | Road Inj<br>[0.58]   | Back Pain<br>[1.06] | Falls<br>[2.04]      | Conduct<br>[1.01]    | Iron<br>[3.64]                              | Anxiety<br>[0.67]    | Upper Digest<br>[4.67] | Congenital<br>[0.94]   |
| Serbia                                           | Neonatal<br>[1.82]  | Headaches<br>[0.87] | Falls<br>[2.07]      | Back Pain<br>[1.0]  | Conduct<br>[1.01]    | Anxiety<br>[0.73]    | Road Inj<br>[0.37]                          | Congenital<br>[0.89] | Depression<br>[0.6]    | Dermatitis<br>[0.61]   |
| Slovakia                                         | Headaches<br>[0.88] | Falls<br>[1.9]      | Back Pain<br>[1.01]  | Conduct<br>[1.04]   | Road Inj<br>[0.5]    | Neonatal<br>[1.03]   | Anxiety<br>[0.68]                           | Congenital<br>[1.05] | Depression<br>[0.58]   | Upper Digest<br>[3.32] |

**eFigure 7e. Leading ten causes of DALYs with the ratio of observed DALYs to DALYs expected on the basis of Socio-Demographic Index alone in 2017, 10-19 years, both sexes combined.** The top ten causes contributing to DALYs are listed globally, by socio-demographic quintile, and then by GBD superregion, region, country, and subnationally where modeled. For each cell, the ratio of observed DALYs to DALYs expected on the basis of socio-demographic index (SDI) alone are listed. Abbreviations: DALY=disability-adjusted life year, GBD=Global Burden of Disease.

Values shown in brackets represent the ratio of observed DALYs to predicted DALYs on the basis of Socio-Demographic Index (SDI), rounded to two (2) digits. Color ranges (shown below) were calculated to place a roughly equal number of cells into each bin.

| COLOR KEY:               |                      | [0.0-0.73]          | [0.73-0.88]          | [0.88-0.95]          | [0.95-1.01]            | [1.01-1.09]          | [1.09-1.26]            | [1.26-1.55]          | [1.55-2.09]          | 2.09+                  |
|--------------------------|----------------------|---------------------|----------------------|----------------------|------------------------|----------------------|------------------------|----------------------|----------------------|------------------------|
|                          | 1                    | 2                   | 3                    | 4                    | 5                      | 6                    | 7                      | 8                    | 9                    | 10                     |
| Slovenia                 | Headaches<br>[0.88]  | Falls<br>[2.18]     | Back Pain<br>[1.08]  | Road Inj<br>[0.6]    | Conduct<br>[1.06]      | Neonatal<br>[1.09]   | Anxiety<br>[0.67]      | Self Harm<br>[0.83]  | Congenital<br>[1.12] | Depression<br>[0.68]   |
| Eastern Europe           | Headaches<br>[0.95]  | Road Inj<br>[0.76]  | Neonatal<br>[1.65]   | Self Harm<br>[1.52]  | Conduct<br>[1.08]      | Falls<br>[1.8]       | Back Pain<br>[0.79]    | Depression<br>[0.74] | Anxiety<br>[0.6]     | Congenital<br>[1.0]    |
| Belarus                  | Headaches<br>[0.96]  | Neonatal<br>[1.66]  | Conduct<br>[1.01]    | Falls<br>[1.78]      | Back Pain<br>[0.82]    | Road Inj<br>[0.41]   | Self Harm<br>[0.84]    | Depression<br>[0.82] | Anxiety<br>[0.62]    | Upper Digest<br>[4.68] |
| Estonia                  | Headaches<br>[0.97]  | Neonatal<br>[1.72]  | Conduct<br>[1.07]    | Falls<br>[1.4]       | Back Pain<br>[0.73]    | Depression<br>[0.83] | Road Inj<br>[0.41]     | Self Harm<br>[0.84]  | Anxiety<br>[0.57]    | Upper Digest<br>[5.47] |
| Latvia                   | Headaches<br>[0.96]  | Neonatal<br>[1.57]  | Road Inj<br>[0.54]   | Conduct<br>[1.04]    | Back Pain<br>[0.81]    | Falls<br>[1.48]      | Upper Digest<br>[6.67] | Self Harm<br>[0.81]  | Anxiety<br>[0.59]    | Depression<br>[0.68]   |
| Lithuania                | Headaches<br>[1.05]  | Neonatal<br>[1.79]  | Self Harm<br>[1.37]  | Road Inj<br>[0.56]   | Conduct<br>[1.03]      | Falls<br>[1.48]      | Back Pain<br>[0.78]    | Depression<br>[0.88] | Anxiety<br>[0.59]    | Upper Digest<br>[5.41] |
| Moldova                  | Headaches<br>[0.98]  | Neonatal<br>[1.79]  | Road Inj<br>[0.57]   | Conduct<br>[0.98]    | Upper Digest<br>[6.02] | Falls<br>[2.0]       | Back Pain<br>[0.89]    | Depression<br>[0.76] | Anxiety<br>[0.69]    | Self Harm<br>[0.74]    |
| Russian Federation       | Headaches<br>[0.94]  | Road Inj<br>[0.74]  | Neonatal<br>[1.65]   | Self Harm<br>[1.47]  | Conduct<br>[1.09]      | Falls<br>[1.79]      | Back Pain<br>[0.73]    | Anxiety<br>[0.6]     | Depression<br>[0.7]  | Upper Digest<br>[4.82] |
| Ukraine                  | Road Inj<br>[0.92]   | Self Harm<br>[1.94] | Headaches<br>[0.97]  | Neonatal<br>[1.65]   | Conduct<br>[1.06]      | Back Pain<br>[0.98]  | Falls<br>[1.99]        | Congenital<br>[1.34] | Drown<br>[1.77]      | Depression<br>[0.85]   |
| High-income              | Headaches<br>[0.94]  | Anxiety<br>[1.1]    | Depression<br>[1.38] | Back Pain<br>[1.03]  | Road Inj<br>[0.55]     | Drugs<br>[2.69]      | Conduct<br>[1.03]      | Neonatal<br>[0.89]   | Self Harm<br>[0.81]  | Acne<br>[1.26]         |
| Australasia              | Depression<br>[1.62] | Anxiety<br>[1.26]   | Headaches<br>[0.88]  | Back Pain<br>[1.22]  | Falls<br>[1.71]        | Road Inj<br>[0.55]   | Asthma<br>[1.88]       | Conduct<br>[1.02]    | Self Harm<br>[1.04]  | Neonatal<br>[0.89]     |
| Australia                | Depression<br>[1.65] | Anxiety<br>[1.21]   | Headaches<br>[0.88]  | Back Pain<br>[1.17]  | Falls<br>[1.65]        | Asthma<br>[1.95]     | Road Inj<br>[0.53]     | Conduct<br>[1.0]     | Self Harm<br>[0.97]  | Neonatal<br>[0.87]     |
| New Zealand              | Anxiety<br>[1.55]    | Back Pain<br>[1.51] | Headaches<br>[0.89]  | Depression<br>[1.49] | Falls<br>[2.03]        | Road Inj<br>[0.64]   | Self Harm<br>[1.36]    | Conduct<br>[1.09]    | Neonatal<br>[1.02]   | Asthma<br>[1.54]       |
| High-income Asia Pacific | Back Pain<br>[1.19]  | Headaches<br>[0.75] | Neonatal<br>[1.12]   | Anxiety<br>[0.78]    | Conduct<br>[0.99]      | Depression<br>[0.94] | Acne<br>[1.26]         | Falls<br>[1.05]      | Self Harm<br>[0.77]  | Dermatitis<br>[1.15]   |
| Brunei                   | Road Inj<br>[0.91]   | Headaches<br>[0.74] | Back Pain<br>[0.96]  | Neonatal<br>[1.13]   | Anxiety<br>[0.8]       | Conduct<br>[0.93]    | Depression<br>[0.86]   | Falls<br>[1.11]      | Drown<br>[3.13]      | Dermatitis<br>[1.07]   |
| Japan                    | Back Pain<br>[1.27]  | Headaches<br>[0.7]  | Neonatal<br>[1.11]   | Conduct<br>[1.03]    | Anxiety<br>[0.77]      | Depression<br>[0.92] | Falls<br>[1.14]        | Acne<br>[1.27]       | Dermatitis<br>[1.21] | Self Harm<br>[0.73]    |
| Aichi                    | Back Pain<br>[1.26]  | Neonatal<br>[1.13]  | Conduct<br>[1.04]    | Anxiety<br>[0.76]    | Headaches<br>[0.56]    | Depression<br>[0.92] | Falls<br>[1.12]        | Acne<br>[1.24]       | Dermatitis<br>[1.22] | Self Harm<br>[0.71]    |
| Akita                    | Back Pain<br>[1.29]  | Headaches<br>[0.71] | Neonatal<br>[1.22]   | Conduct<br>[1.01]    | Depression<br>[0.98]   | Anxiety<br>[0.79]    | Self Harm<br>[0.87]    | Falls<br>[1.2]       | Dermatitis<br>[1.22] | Acne<br>[1.36]         |
| Aomori                   | Back Pain<br>[1.29]  | Headaches<br>[0.71] | Neonatal<br>[1.14]   | Conduct<br>[1.0]     | Anxiety<br>[0.79]      | Depression<br>[0.95] | Falls<br>[1.19]        | Self Harm<br>[0.77]  | Dermatitis<br>[1.22] | Acne<br>[1.35]         |
| Chiba                    | Back Pain<br>[1.26]  | Headaches<br>[0.71] | Conduct<br>[1.03]    | Neonatal<br>[1.1]    | Anxiety<br>[0.77]      | Depression<br>[0.92] | Falls<br>[1.15]        | Acne<br>[1.28]       | Dermatitis<br>[1.22] | Self Harm<br>[0.79]    |
| Ehime                    | Back Pain<br>[1.25]  | Headaches<br>[0.71] | Conduct<br>[1.02]    | Anxiety<br>[0.78]    | Depression<br>[0.91]   | Neonatal<br>[0.93]   | Falls<br>[1.19]        | Self Harm<br>[0.79]  | Road Inj<br>[0.35]   | Dermatitis<br>[1.22]   |
| Fukui                    | Back Pain<br>[1.26]  | Headaches<br>[0.71] | Conduct<br>[1.02]    | Neonatal<br>[1.1]    | Anxiety<br>[0.77]      | Depression<br>[0.89] | Falls<br>[1.14]        | Acne<br>[1.31]       | Dermatitis<br>[1.22] | Road Inj<br>[0.28]     |
| Fukuoka                  | Back Pain<br>[1.26]  | Headaches<br>[0.71] | Conduct<br>[1.03]    | Neonatal<br>[1.09]   | Anxiety<br>[0.77]      | Depression<br>[0.91] | Falls<br>[1.15]        | Acne<br>[1.3]        | Dermatitis<br>[1.21] | Iron<br>[3.75]         |
| Fukushima                | Back Pain<br>[1.28]  | Headaches<br>[0.7]  | Conduct<br>[1.01]    | Neonatal<br>[1.05]   | Anxiety<br>[0.79]      | Depression<br>[0.92] | Self Harm<br>[0.88]    | Falls<br>[1.2]       | Dermatitis<br>[1.22] | Road Inj<br>[0.34]     |
| Gifu                     | Back Pain<br>[1.29]  | Headaches<br>[0.71] | Neonatal<br>[1.14]   | Conduct<br>[1.02]    | Anxiety<br>[0.78]      | Depression<br>[0.78] | Falls<br>[1.17]        | Road Inj<br>[0.36]   | Dermatitis<br>[1.22] | Acne<br>[1.3]          |
| Gunma                    | Back Pain<br>[1.28]  | Headaches<br>[0.71] | Conduct<br>[1.02]    | Neonatal<br>[1.08]   | Anxiety<br>[0.78]      | Depression<br>[0.95] | Road Inj<br>[0.39]     | Falls<br>[1.18]      | Self Harm<br>[0.85]  | Acne<br>[1.3]          |
| Hiroshima                | Back Pain<br>[1.24]  | Headaches<br>[0.71] | Neonatal<br>[1.15]   | Conduct<br>[1.04]    | Anxiety<br>[0.76]      | Depression<br>[0.88] | Falls<br>[1.13]        | Acne<br>[1.26]       | Dermatitis<br>[1.22] | Road Inj<br>[0.31]     |
| Hokkaido                 | Back Pain<br>[1.28]  | Headaches<br>[0.71] | Conduct<br>[1.01]    | Neonatal<br>[1.08]   | Anxiety<br>[0.78]      | Depression<br>[0.93] | Falls<br>[1.17]        | Self Harm<br>[0.78]  | Dermatitis<br>[1.21] | Acne<br>[1.33]         |
| Hyogo                    | Back Pain<br>[1.26]  | Headaches<br>[0.72] | Neonatal<br>[1.12]   | Conduct<br>[1.03]    | Anxiety<br>[0.77]      | Depression<br>[0.94] | Falls<br>[1.14]        | Acne<br>[1.29]       | Dermatitis<br>[1.22] | Self Harm<br>[0.75]    |
| Ibaraki                  | Back Pain<br>[1.27]  | Headaches<br>[0.62] | Neonatal<br>[1.16]   | Conduct<br>[1.03]    | Anxiety<br>[0.77]      | Depression<br>[0.93] | Road Inj<br>[0.45]     | Falls<br>[1.16]      | Acne<br>[1.31]       | Dermatitis<br>[1.21]   |
| Ishikawa                 | Back Pain<br>[1.26]  | Headaches<br>[0.72] | Conduct<br>[1.02]    | Neonatal<br>[1.08]   | Anxiety<br>[0.77]      | Depression<br>[0.9]  | Falls<br>[1.16]        | Acne<br>[1.31]       | Dermatitis<br>[1.21] | Road Inj<br>[0.31]     |

**eFigure 7e. Leading ten causes of DALYs with the ratio of observed DALYs to DALYs expected on the basis of Socio-Demographic Index alone in 2017, 10-19 years, both sexes combined.** The top ten causes contributing to DALYs are listed globally, by socio-demographic quintile, and then by GBD superregion, region, country, and subnationally where modeled. For each cell, the ratio of observed DALYs to DALYs expected on the basis of socio-demographic index (SDI) alone are listed. Abbreviations: DALY=disability-adjusted life year, GBD=Global Burden of Disease.

Values shown in brackets represent the ratio of observed DALYs to predicted DALYs on the basis of Socio-Demographic Index (SDI), rounded to two (2) digits. Color ranges (shown below) were calculated to place a roughly equal number of cells into each bin.

| COLOR KEY: |                     | [0.0-0.73]          | [0.73-0.88]        | [0.88-0.95]        | [0.95-1.01]        | [1.01-1.09]          | [1.09-1.26]          | [1.26-1.55]          | [1.55-2.09]          | 2.09+                |
|------------|---------------------|---------------------|--------------------|--------------------|--------------------|----------------------|----------------------|----------------------|----------------------|----------------------|
|            | 1                   | 2                   | 3                  | 4                  | 5                  | 6                    | 7                    | 8                    | 9                    | 10                   |
| Iwate      | Back Pain<br>[1.29] | Headaches<br>[0.71] | Neonatal<br>[1.17] | Conduct<br>[1.01]  | Anxiety<br>[0.79]  | Depression<br>[0.96] | Falls<br>[1.19]      | Self Harm<br>[0.81]  | Dermatitis<br>[1.22] | Acne<br>[1.35]       |
| Kagawa     | Back Pain<br>[1.24] | Headaches<br>[0.71] | Conduct<br>[1.02]  | Neonatal<br>[1.06] | Anxiety<br>[0.78]  | Road Inj<br>[0.45]   | Depression<br>[0.88] | Falls<br>[1.16]      | Dermatitis<br>[1.22] | Acne<br>[1.3]        |
| Kagoshima  | Back Pain<br>[1.25] | Headaches<br>[0.7]  | Conduct<br>[1.02]  | Anxiety<br>[0.79]  | Neonatal<br>[0.97] | Depression<br>[0.78] | Falls<br>[1.2]       | Dermatitis<br>[1.23] | Acne<br>[1.31]       | Road Inj<br>[0.33]   |
| Kanagawa   | Back Pain<br>[1.26] | Headaches<br>[0.72] | Neonatal<br>[1.15] | Conduct<br>[1.04]  | Anxiety<br>[0.76]  | Depression<br>[0.95] | Falls<br>[1.13]      | Acne<br>[1.26]       | Dermatitis<br>[1.21] | Self Harm<br>[0.73]  |
| Kochi      | Back Pain<br>[1.27] | Headaches<br>[0.71] | Conduct<br>[1.01]  | Neonatal<br>[1.04] | Anxiety<br>[0.79]  | Depression<br>[0.9]  | Falls<br>[1.21]      | Iron<br>[3.9]        | Dermatitis<br>[1.22] | Acne<br>[1.35]       |
| Kumamoto   | Back Pain<br>[1.25] | Headaches<br>[0.7]  | Conduct<br>[1.02]  | Anxiety<br>[0.79]  | Neonatal<br>[1.02] | Depression<br>[0.89] | Falls<br>[1.19]      | Dermatitis<br>[1.22] | Acne<br>[1.34]       | Iron<br>[3.14]       |
| Kyoto      | Back Pain<br>[1.29] | Headaches<br>[0.73] | Neonatal<br>[1.15] | Conduct<br>[1.03]  | Anxiety<br>[0.76]  | Depression<br>[0.94] | Falls<br>[1.12]      | Acne<br>[1.27]       | Congenital<br>[0.9]  | Road Inj<br>[0.28]   |
| Mie        | Back Pain<br>[1.25] | Headaches<br>[0.71] | Neonatal<br>[1.14] | Conduct<br>[1.03]  | Anxiety<br>[0.77]  | Depression<br>[0.89] | Road Inj<br>[0.38]   | Falls<br>[1.15]      | Acne<br>[1.29]       | Dermatitis<br>[1.22] |
| Miyagi     | Back Pain<br>[1.29] | Headaches<br>[0.72] | Conduct<br>[1.02]  | Neonatal<br>[1.06] | Anxiety<br>[0.78]  | Depression<br>[0.97] | Falls<br>[1.16]      | Acne<br>[1.34]       | Dermatitis<br>[1.21] | Self Harm<br>[0.66]  |
| Miyazaki   | Back Pain<br>[1.26] | Headaches<br>[0.7]  | Conduct<br>[1.01]  | Anxiety<br>[0.79]  | Neonatal<br>[1.02] | Depression<br>[0.91] | Iron<br>[4.08]       | Falls<br>[1.22]      | Dermatitis<br>[1.22] | Self Harm<br>[0.76]  |
| Nagano     | Back Pain<br>[1.26] | Headaches<br>[0.71] | Neonatal<br>[1.17] | Conduct<br>[1.03]  | Anxiety<br>[0.77]  | Depression<br>[0.9]  | Self Harm<br>[0.88]  | Falls<br>[1.17]      | Acne<br>[1.31]       | Dermatitis<br>[1.22] |
| Nagasaki   | Back Pain<br>[1.25] | Headaches<br>[0.71] | Conduct<br>[1.01]  | Anxiety<br>[0.79]  | Neonatal<br>[1.02] | Depression<br>[0.89] | Falls<br>[1.21]      | Dermatitis<br>[1.22] | Acne<br>[1.35]       | Iron<br>[3.42]       |
| Nara       | Back Pain<br>[1.31] | Headaches<br>[0.72] | Conduct<br>[1.02]  | Anxiety<br>[0.78]  | Neonatal<br>[1.0]  | Depression<br>[0.91] | Falls<br>[1.18]      | Acne<br>[1.31]       | Dermatitis<br>[1.21] | Road Inj<br>[0.31]   |
| Niigata    | Back Pain<br>[1.43] | Headaches<br>[0.71] | Neonatal<br>[1.13] | Conduct<br>[1.02]  | Anxiety<br>[0.78]  | Depression<br>[0.97] | Falls<br>[1.17]      | Self Harm<br>[0.82]  | Acne<br>[1.33]       | Dermatitis<br>[1.22] |
| Oita       | Back Pain<br>[1.25] | Headaches<br>[0.71] | Neonatal<br>[1.17] | Conduct<br>[1.02]  | Anxiety<br>[0.78]  | Depression<br>[0.91] | Falls<br>[1.18]      | Dermatitis<br>[1.22] | Acne<br>[1.32]       | Self Harm<br>[0.7]   |
| Okayama    | Back Pain<br>[1.27] | Headaches<br>[0.72] | Neonatal<br>[1.18] | Conduct<br>[1.03]  | Anxiety<br>[0.77]  | Depression<br>[0.9]  | Falls<br>[1.14]      | Acne<br>[1.3]        | Dermatitis<br>[1.21] | Road Inj<br>[0.3]    |
| Okinawa    | Back Pain<br>[1.25] | Headaches<br>[0.7]  | Conduct<br>[1.01]  | Neonatal<br>[1.07] | Anxiety<br>[0.79]  | Depression<br>[0.88] | Falls<br>[1.22]      | Dermatitis<br>[1.22] | Acne<br>[1.34]       | Iron<br>[3.46]       |
| Osaka      | Back Pain<br>[1.28] | Headaches<br>[0.72] | Conduct<br>[1.03]  | Anxiety<br>[0.76]  | Neonatal<br>[1.05] | Depression<br>[0.96] | Falls<br>[1.14]      | Acne<br>[1.26]       | Dermatitis<br>[1.21] | Self Harm<br>[0.71]  |
| Saga       | Back Pain<br>[1.26] | Headaches<br>[0.71] | Conduct<br>[1.01]  | Neonatal<br>[1.06] | Anxiety<br>[0.79]  | Depression<br>[0.88] | Falls<br>[1.18]      | Dermatitis<br>[1.22] | Acne<br>[1.33]       | Road Inj<br>[0.33]   |
| Saitama    | Back Pain<br>[1.31] | Headaches<br>[0.71] | Conduct<br>[1.02]  | Neonatal<br>[1.09] | Anxiety<br>[0.78]  | Depression<br>[0.95] | Falls<br>[1.18]      | Self Harm<br>[0.83]  | Acne<br>[1.31]       | Dermatitis<br>[1.21] |
| Shiga      | Back Pain<br>[1.26] | Headaches<br>[0.71] | Conduct<br>[1.04]  | Anxiety<br>[0.76]  | Neonatal<br>[1.04] | Depression<br>[0.89] | Dermatitis<br>[1.5]  | Falls<br>[1.12]      | Acne<br>[1.26]       | Road Inj<br>[0.3]    |
| Shimane    | Back Pain<br>[1.18] | Headaches<br>[0.7]  | Conduct<br>[1.02]  | Neonatal<br>[1.05] | Anxiety<br>[0.79]  | Depression<br>[0.92] | Self Harm<br>[0.83]  | Falls<br>[1.2]       | Dermatitis<br>[1.21] | Acne<br>[1.33]       |
| Shizuoka   | Back Pain<br>[1.24] | Headaches<br>[0.71] | Neonatal<br>[1.22] | Conduct<br>[1.04]  | Anxiety<br>[0.77]  | Depression<br>[0.9]  | Falls<br>[1.13]      | Acne<br>[1.28]       | Dermatitis<br>[1.22] | Road Inj<br>[0.3]    |
| Tochigi    | Back Pain<br>[1.27] | Headaches<br>[0.71] | Neonatal<br>[1.17] | Conduct<br>[1.03]  | Anxiety<br>[0.77]  | Depression<br>[0.9]  | Road Inj<br>[0.41]   | Falls<br>[1.15]      | Self Harm<br>[0.84]  | Dermatitis<br>[1.22] |
| Tokushima  | Back Pain<br>[1.26] | Headaches<br>[0.72] | Neonatal<br>[1.11] | Conduct<br>[1.01]  | Anxiety<br>[0.78]  | Depression<br>[0.91] | Falls<br>[1.18]      | Road Inj<br>[0.37]   | Dermatitis<br>[1.22] | Acne<br>[1.3]        |
| Tokyo      | Back Pain<br>[1.24] | Headaches<br>[0.73] | Neonatal<br>[1.15] | Conduct<br>[1.08]  | Anxiety<br>[0.73]  | Depression<br>[0.88] | Falls<br>[1.04]      | Acne<br>[1.16]       | Dermatitis<br>[1.23] | Self Harm<br>[0.81]  |
| Tottori    | Back Pain<br>[1.26] | Headaches<br>[0.66] | Neonatal<br>[1.13] | Conduct<br>[1.01]  | Anxiety<br>[0.79]  | Depression<br>[0.91] | Falls<br>[1.19]      | Road Inj<br>[0.35]   | Dermatitis<br>[1.22] | Acne<br>[1.33]       |
| Toyama     | Back Pain<br>[1.25] | Headaches<br>[0.71] | Conduct<br>[1.04]  | Neonatal<br>[1.07] | Anxiety<br>[0.77]  | Depression<br>[0.91] | Self Harm<br>[0.9]   | Falls<br>[1.15]      | Road Inj<br>[0.37]   | Acne<br>[1.28]       |
| Wakayama   | Back Pain<br>[1.44] | Headaches<br>[0.71] | Neonatal<br>[1.17] | Conduct<br>[1.02]  | Anxiety<br>[0.78]  | Depression<br>[0.92] | Falls<br>[1.17]      | Dermatitis<br>[1.22] | Acne<br>[1.31]       | Road Inj<br>[0.28]   |
| Yamagata   | Back Pain<br>[1.28] | Headaches<br>[0.71] | Conduct<br>[1.01]  | Anxiety<br>[0.79]  | Neonatal<br>[0.96] | Depression<br>[0.88] | Falls<br>[1.21]      | Self Harm<br>[0.78]  | Dermatitis<br>[1.22] | Acne<br>[1.35]       |
| Yamaguchi  | Back Pain<br>[1.25] | Headaches<br>[0.71] | Conduct<br>[1.02]  | Anxiety<br>[0.78]  | Neonatal<br>[0.98] | Depression<br>[0.91] | Falls<br>[1.15]      | Acne<br>[1.31]       | Dermatitis<br>[1.22] | Road Inj<br>[0.33]   |

**eFigure 7e. Leading ten causes of DALYs with the ratio of observed DALYs to DALYs expected on the basis of Socio-Demographic Index alone in 2017, 10-19 years, both sexes combined.** The top ten causes contributing to DALYs are listed globally, by socio-demographic quintile, and then by GBD superregion, region, country, and subnationally where modeled. For each cell, the ratio of observed DALYs to DALYs expected on the basis of socio-demographic index (SDI) alone are listed. Abbreviations: DALY=disability-adjusted life year, GBD=Global Burden of Disease.

Values shown in brackets represent the ratio of observed DALYs to predicted DALYs on the basis of Socio-Demographic Index (SDI), rounded to two (2) digits. Color ranges (shown below) were calculated to place a roughly equal number of cells into each bin.

| COLOR KEY:                |                      | [0.0-0.73]           | [0.73-0.88]          | [0.88-0.95]          | [0.95-1.01]          | [1.01-1.09]          | [1.09-1.26]         | [1.26-1.55]          | [1.55-2.09]          | 2.09+                |
|---------------------------|----------------------|----------------------|----------------------|----------------------|----------------------|----------------------|---------------------|----------------------|----------------------|----------------------|
|                           | 1                    | 2                    | 3                    | 4                    | 5                    | 6                    | 7                   | 8                    | 9                    | 10                   |
| Yamanashi                 | Back Pain<br>[1.28]  | Headaches<br>[0.71]  | Neonatal<br>[1.23]   | Conduct<br>[1.03]    | Anxiety<br>[0.77]    | Depression<br>[0.91] | Falls<br>[1.15]     | Acne<br>[1.29]       | Dermatitis<br>[1.2]  | Iron<br>[3.84]       |
| S Korea                   | Headaches<br>[0.86]  | Back Pain<br>[1.06]  | Neonatal<br>[1.14]   | Anxiety<br>[0.83]    | Depression<br>[0.97] | Conduct<br>[0.89]    | Self Harm<br>[0.88] | Road Inj<br>[0.38]   | Acne<br>[1.29]       | Falls<br>[0.89]      |
| Singapore                 | Headaches<br>[0.72]  | Depression<br>[1.24] | Back Pain<br>[0.91]  | Neonatal<br>[1.14]   | Anxiety<br>[0.82]    | Conduct<br>[0.89]    | Acne<br>[1.23]      | Falls<br>[0.99]      | Dermatitis<br>[0.95] | Road Inj<br>[0.27]   |
| High-income North America | Drugs<br>[5.3]       | Depression<br>[1.83] | Headaches<br>[1.02]  | Road Inj<br>[0.77]   | Anxiety<br>[1.02]    | Conduct<br>[1.2]     | Back Pain<br>[0.83] | Self Harm<br>[1.09]  | Violence<br>[3.77]   | Neonatal<br>[0.86]   |
| Canada                    | Headaches<br>[1.04]  | Drugs<br>[4.22]      | Depression<br>[1.36] | Road Inj<br>[0.67]   | Back Pain<br>[0.93]  | Anxiety<br>[0.83]    | Self Harm<br>[1.23] | Conduct<br>[1.02]    | Acne<br>[1.25]       | Dermatitis<br>[1.22] |
| Greenland                 | Self Harm<br>[6.67]  | Depression<br>[2.51] | Headaches<br>[1.01]  | Drugs<br>[3.74]      | Anxiety<br>[1.04]    | Violence<br>[2.62]   | Conduct<br>[0.98]   | Back Pain<br>[0.79]  | Road Inj<br>[0.35]   | Dermatitis<br>[1.17] |
| USA                       | Drugs<br>[5.43]      | Depression<br>[1.87] | Headaches<br>[1.01]  | Road Inj<br>[0.78]   | Anxiety<br>[1.05]    | Conduct<br>[1.21]    | Back Pain<br>[0.82] | Self Harm<br>[1.07]  | Violence<br>[3.88]   | Neonatal<br>[0.88]   |
| Alabama                   | Drugs<br>[6.81]      | Road Inj<br>[1.29]   | Depression<br>[1.84] | Headaches<br>[1.02]  | Anxiety<br>[1.08]    | Back Pain<br>[1.05]  | Violence<br>[4.72]  | Conduct<br>[1.17]    | Self Harm<br>[1.09]  | Neonatal<br>[0.87]   |
| Alaska                    | Drugs<br>[6.02]      | Depression<br>[1.87] | Self Harm<br>[2.07]  | Headaches<br>[1.01]  | Anxiety<br>[1.05]    | Road Inj<br>[0.62]   | Conduct<br>[1.21]   | Back Pain<br>[0.93]  | Neonatal<br>[0.84]   | Oth MSK<br>[5.87]    |
| Arizona                   | Drugs<br>[7.0]       | Depression<br>[2.13] | Headaches<br>[1.01]  | Road Inj<br>[0.73]   | Anxiety<br>[1.07]    | Conduct<br>[1.18]    | Self Harm<br>[1.33] | Back Pain<br>[0.9]   | Neonatal<br>[0.88]   | Violence<br>[3.01]   |
| Arkansas                  | Road Inj<br>[1.27]   | Drugs<br>[6.4]       | Depression<br>[2.15] | Headaches<br>[1.02]  | Anxiety<br>[1.09]    | Self Harm<br>[1.36]  | Conduct<br>[1.17]   | Violence<br>[3.6]    | Back Pain<br>[0.82]  | Neonatal<br>[0.77]   |
| California                | Depression<br>[1.83] | Headaches<br>[1.02]  | Drugs<br>[3.92]      | Anxiety<br>[1.02]    | Conduct<br>[1.21]    | Road Inj<br>[0.58]   | Violence<br>[4.41]  | Back Pain<br>[0.7]   | Dermatitis<br>[1.31] | Acne<br>[1.3]        |
| Colorado                  | Depression<br>[2.07] | Drugs<br>[4.71]      | Headaches<br>[1.02]  | Self Harm<br>[1.74]  | Road Inj<br>[0.71]   | Anxiety<br>[1.04]    | Conduct<br>[1.22]   | Back Pain<br>[0.83]  | Neonatal<br>[0.89]   | Oth MSK<br>[5.77]    |
| Connecticut               | Drugs<br>[6.31]      | Headaches<br>[1.04]  | Depression<br>[1.67] | Anxiety<br>[1.02]    | Conduct<br>[1.23]    | Road Inj<br>[0.6]    | Neonatal<br>[1.03]  | Back Pain<br>[0.7]   | Dermatitis<br>[1.37] | Acne<br>[1.27]       |
| Delaware                  | Drugs<br>[7.23]      | Depression<br>[1.97] | Headaches<br>[1.03]  | Road Inj<br>[0.84]   | Anxiety<br>[1.05]    | Conduct<br>[1.2]     | Back Pain<br>[0.72] | Self Harm<br>[0.95]  | Neonatal<br>[0.85]   | Violence<br>[3.57]   |
| DC                        | Violence<br>[17.57]  | Drugs<br>[5.4]       | Headaches<br>[1.06]  | Depression<br>[1.63] | Anxiety<br>[1.06]    | Conduct<br>[1.2]     | Road Inj<br>[0.54]  | Dermatitis<br>[1.53] | Acne<br>[1.45]       | Neonatal<br>[0.89]   |
| Florida                   | Drugs<br>[5.68]      | Depression<br>[1.83] | Headaches<br>[1.03]  | Road Inj<br>[0.84]   | Anxiety<br>[1.06]    | Conduct<br>[1.2]     | Violence<br>[4.48]  | Neonatal<br>[0.98]   | Back Pain<br>[0.73]  | Self Harm<br>[0.99]  |
| Georgia                   | Drugs<br>[5.12]      | Headaches<br>[1.02]  | Road Inj<br>[0.89]   | Depression<br>[1.77] | Anxiety<br>[1.07]    | Conduct<br>[1.19]    | Violence<br>[4.4]   | Back Pain<br>[0.8]   | Self Harm<br>[0.96]  | Neonatal<br>[0.81]   |
| Hawaii                    | Depression<br>[1.85] | Headaches<br>[1.02]  | Anxiety<br>[1.04]    | Road Inj<br>[0.62]   | Conduct<br>[1.21]    | Drugs<br>[2.76]      | Self Harm<br>[1.04] | Dermatitis<br>[1.41] | Neonatal<br>[0.81]   | Acne<br>[1.32]       |
| Idaho                     | Drugs<br>[5.27]      | Depression<br>[2.07] | Road Inj<br>[0.89]   | Headaches<br>[1.01]  | Self Harm<br>[1.57]  | Anxiety<br>[1.07]    | Conduct<br>[1.19]   | Back Pain<br>[0.84]  | Oth MSK<br>[6.21]    | Neonatal<br>[0.73]   |
| Illinois                  | Drugs<br>[4.7]       | Headaches<br>[1.03]  | Depression<br>[1.7]  | Violence<br>[6.91]   | Anxiety<br>[1.04]    | Road Inj<br>[0.63]   | Conduct<br>[1.21]   | Back Pain<br>[0.9]   | Neonatal<br>[1.03]   | Oth MSK<br>[5.89]    |
| Indiana                   | Drugs<br>[6.68]      | Depression<br>[1.98] | Road Inj<br>[0.93]   | Headaches<br>[1.02]  | Anxiety<br>[1.07]    | Conduct<br>[1.18]    | Back Pain<br>[0.96] | Self Harm<br>[1.28]  | Violence<br>[4.02]   | Neonatal<br>[0.84]   |
| Iowa                      | Headaches<br>[1.02]  | Depression<br>[1.78] | Back Pain<br>[1.43]  | Road Inj<br>[0.83]   | Anxiety<br>[1.05]    | Conduct<br>[1.2]     | Drugs<br>[2.8]      | Self Harm<br>[1.25]  | Oth MSK<br>[7.04]    | Neonatal<br>[0.85]   |
| Kansas                    | Depression<br>[1.89] | Road Inj<br>[0.95]   | Headaches<br>[1.02]  | Drugs<br>[3.55]      | Back Pain<br>[1.13]  | Anxiety<br>[1.05]    | Conduct<br>[1.2]    | Self Harm<br>[1.24]  | Neonatal<br>[0.9]    | Oth MSK<br>[5.85]    |
| Kentucky                  | Drugs<br>[9.86]      | Road Inj<br>[1.06]   | Depression<br>[1.99] | Headaches<br>[1.01]  | Anxiety<br>[1.08]    | Back Pain<br>[1.09]  | Conduct<br>[1.17]   | Self Harm<br>[1.2]   | Neonatal<br>[0.86]   | Oth MSK<br>[6.3]     |
| Louisiana                 | Drugs<br>[7.14]      | Road Inj<br>[1.06]   | Violence<br>[7.22]   | Headaches<br>[1.02]  | Depression<br>[1.78] | Anxiety<br>[1.08]    | Conduct<br>[1.18]   | Self Harm<br>[1.14]  | Back Pain<br>[0.87]  | Neonatal<br>[0.79]   |
| Maine                     | Drugs<br>[7.24]      | Depression<br>[1.95] | Road Inj<br>[0.96]   | Headaches<br>[1.02]  | Anxiety<br>[1.05]    | Conduct<br>[1.2]     | Self Harm<br>[1.37] | Back Pain<br>[0.89]  | Oth MSK<br>[7.51]    | Neonatal<br>[0.88]   |
| Maryland                  | Depression<br>[1.78] | Headaches<br>[1.03]  | Drugs<br>[3.92]      | Anxiety<br>[1.03]    | Violence<br>[6.92]   | Road Inj<br>[0.66]   | Conduct<br>[1.23]   | Self Harm<br>[1.15]  | Neonatal<br>[1.02]   | Back Pain<br>[0.66]  |
| Massachusetts             | Drugs<br>[6.31]      | Depression<br>[1.81] | Headaches<br>[1.05]  | Anxiety<br>[1.02]    | Conduct<br>[1.24]    | Road Inj<br>[0.51]   | Neonatal<br>[0.98]  | Back Pain<br>[0.68]  | Oth MSK<br>[5.46]    | Self Harm<br>[0.94]  |
| Michigan                  | Drugs<br>[6.29]      | Depression<br>[1.93] | Road Inj<br>[0.76]   | Headaches<br>[0.83]  | Anxiety<br>[1.05]    | Conduct<br>[1.2]     | Self Harm<br>[1.25] | Violence<br>[4.6]    | Back Pain<br>[0.79]  | Neonatal<br>[0.87]   |
| Minnesota                 | Depression<br>[1.83] | Headaches<br>[1.03]  | Anxiety<br>[1.03]    | Conduct<br>[1.23]    | Road Inj<br>[0.61]   | Drugs<br>[2.74]      | Self Harm<br>[1.31] | Back Pain<br>[0.72]  | Neonatal<br>[0.92]   | Oth MSK<br>[5.58]    |

**eFigure 7e. Leading ten causes of DALYs with the ratio of observed DALYs to DALYs expected on the basis of Socio-Demographic Index alone in 2017, 10-19 years, both sexes combined.** The top ten causes contributing to DALYs are listed globally, by socio-demographic quintile, and then by GBD superregion, region, country, and subnationally where modeled. For each cell, the ratio of observed DALYs to DALYs expected on the basis of socio-demographic index (SDI) alone are listed. Abbreviations: DALY=disability-adjusted life year, GBD=Global Burden of Disease.

Values shown in brackets represent the ratio of observed DALYs to predicted DALYs on the basis of Socio-Demographic Index (SDI), rounded to two (2) digits. Color ranges (shown below) were calculated to place a roughly equal number of cells into each bin.

| COLOR KEY:             |                      | [0.0-0.73]           | (0.73-0.88]          | (0.88-0.95]          | (0.95-1.01]          | (1.01-1.09]          | (1.09-1.26]         | (1.26-1.55]         | (1.55-2.09]          | 2.09+                |
|------------------------|----------------------|----------------------|----------------------|----------------------|----------------------|----------------------|---------------------|---------------------|----------------------|----------------------|
|                        | 1                    | 2                    | 3                    | 4                    | 5                    | 6                    | 7                   | 8                   | 9                    | 10                   |
| Mississippi            | Road Inj<br>[1.52]   | Drugs<br>[6.35]      | Headaches<br>[1.02]  | Depression<br>[1.8]  | Anxiety<br>[1.1]     | Violence<br>[4.25]   | Conduct<br>[1.17]   | Self Harm<br>[1.0]  | Back Pain<br>[0.74]  | Neonatal<br>[0.84]   |
| Missouri               | Drugs<br>[5.89]      | Road Inj<br>[1.01]   | Depression<br>[2.01] | Headaches<br>[1.02]  | Anxiety<br>[1.06]    | Conduct<br>[1.19]    | Violence<br>[5.01]  | Self Harm<br>[1.23] | Back Pain<br>[0.9]   | Neonatal<br>[0.9]    |
| Montana                | Road Inj<br>[1.44]   | Drugs<br>[5.4]       | Depression<br>[1.97] | Self Harm<br>[2.08]  | Headaches<br>[1.01]  | Anxiety<br>[1.05]    | Conduct<br>[1.21]   | Back Pain<br>[0.94] | Oth MSK<br>[6.81]    | Neonatal<br>[0.85]   |
| Nebraska               | Road Inj<br>[1.0]    | Headaches<br>[1.02]  | Depression<br>[1.76] | Back Pain<br>[1.22]  | Anxiety<br>[1.04]    | Conduct<br>[1.22]    | Drugs<br>[2.8]      | Self Harm<br>[1.2]  | Neonatal<br>[0.85]   | Oth MSK<br>[5.51]    |
| Nevada                 | Drugs<br>[7.25]      | Depression<br>[1.96] | Headaches<br>[1.01]  | Road Inj<br>[0.77]   | Anxiety<br>[1.07]    | Conduct<br>[1.19]    | Violence<br>[4.52]  | Self Harm<br>[1.24] | Back Pain<br>[0.71]  | Neonatal<br>[0.83]   |
| New Hampshire          | Drugs<br>[7.22]      | Depression<br>[2.03] | Headaches<br>[1.04]  | Anxiety<br>[1.02]    | Road Inj<br>[0.67]   | Conduct<br>[1.23]    | Back Pain<br>[0.83] | Self Harm<br>[1.04] | Oth MSK<br>[5.97]    | Neonatal<br>[0.83]   |
| New Jersey             | Drugs<br>[5.15]      | Headaches<br>[1.03]  | Depression<br>[1.57] | Anxiety<br>[1.02]    | Conduct<br>[1.23]    | Back Pain<br>[0.77]  | Road Inj<br>[0.49]  | Neonatal<br>[0.93]  | Dermatitis<br>[1.43] | Acne<br>[1.3]        |
| New Mexico             | Drugs<br>[6.55]      | Depression<br>[2.14] | Road Inj<br>[0.96]   | Headaches<br>[1.01]  | Self Harm<br>[1.67]  | Anxiety<br>[1.08]    | Conduct<br>[1.18]   | Back Pain<br>[0.96] | Violence<br>[3.38]   | Neonatal<br>[0.93]   |
| New York               | Drugs<br>[4.59]      | Depression<br>[1.94] | Headaches<br>[1.03]  | Anxiety<br>[1.03]    | Conduct<br>[1.22]    | Road Inj<br>[0.48]   | Neonatal<br>[0.97]  | Acne<br>[1.48]      | Dermatitis<br>[1.5]  | Back Pain<br>[0.69]  |
| N Carolina             | Drugs<br>[5.57]      | Depression<br>[1.83] | Road Inj<br>[0.9]    | Headaches<br>[1.02]  | Anxiety<br>[1.0]     | Conduct<br>[1.11]    | Self Harm<br>[0.99] | Back Pain<br>[0.72] | Neonatal<br>[0.89]   | Violence<br>[3.4]    |
| N Dakota               | Road Inj<br>[1.29]   | Headaches<br>[1.02]  | Depression<br>[1.7]  | Self Harm<br>[1.68]  | Anxiety<br>[1.04]    | Back Pain<br>[1.02]  | Conduct<br>[1.22]   | Oth MSK<br>[8.75]   | Drugs<br>[2.71]      | Neonatal<br>[0.92]   |
| Ohio                   | Drugs<br>[7.85]      | Depression<br>[1.9]  | Headaches<br>[1.02]  | Road Inj<br>[0.76]   | Anxiety<br>[1.06]    | Conduct<br>[1.19]    | Back Pain<br>[0.87] | Self Harm<br>[1.15] | Violence<br>[3.82]   | Neonatal<br>[0.83]   |
| Oklahoma               | Drugs<br>[7.85]      | Road Inj<br>[1.16]   | Depression<br>[1.96] | Headaches<br>[1.01]  | Self Harm<br>[1.51]  | Anxiety<br>[1.07]    | Conduct<br>[1.18]   | Back Pain<br>[0.98] | Violence<br>[3.62]   | Oth MSK<br>[6.38]    |
| Oregon                 | Drugs<br>[6.55]      | Depression<br>[2.05] | Headaches<br>[1.02]  | Road Inj<br>[0.63]   | Anxiety<br>[0.97]    | Self Harm<br>[1.36]  | Conduct<br>[1.1]    | Back Pain<br>[0.76] | Oth MSK<br>[6.04]    | Dermatitis<br>[1.22] |
| Pennsylvania           | Drugs<br>[7.72]      | Depression<br>[1.84] | Headaches<br>[0.93]  | Road Inj<br>[0.73]   | Anxiety<br>[1.04]    | Back Pain<br>[1.04]  | Conduct<br>[1.21]   | Self Harm<br>[1.03] | Violence<br>[4.25]   | Oth MSK<br>[6.4]     |
| Rhode Island           | Drugs<br>[7.93]      | Depression<br>[2.02] | Headaches<br>[1.04]  | Anxiety<br>[1.04]    | Conduct<br>[1.21]    | Road Inj<br>[0.53]   | Back Pain<br>[0.68] | Neonatal<br>[0.84]  | Self Harm<br>[0.85]  | Oth MSK<br>[5.21]    |
| S Carolina             | Drugs<br>[6.56]      | Road Inj<br>[1.2]    | Depression<br>[1.91] | Headaches<br>[1.02]  | Anxiety<br>[1.07]    | Conduct<br>[1.18]    | Back Pain<br>[0.86] | Violence<br>[4.1]   | Self Harm<br>[1.05]  | Neonatal<br>[0.83]   |
| S Dakota               | Road Inj<br>[1.38]   | Headaches<br>[1.01]  | Self Harm<br>[1.94]  | Depression<br>[1.65] | Back Pain<br>[1.23]  | Anxiety<br>[1.05]    | Conduct<br>[1.21]   | Drugs<br>[2.77]     | Oth MSK<br>[7.55]    | Neonatal<br>[0.75]   |
| Tennessee              | Drugs<br>[8.07]      | Road Inj<br>[0.96]   | Depression<br>[1.95] | Headaches<br>[1.02]  | Anxiety<br>[1.08]    | Conduct<br>[1.17]    | Violence<br>[4.17]  | Back Pain<br>[0.85] | Self Harm<br>[1.07]  | Neonatal<br>[0.83]   |
| Texas                  | Depression<br>[1.81] | Headaches<br>[1.01]  | Road Inj<br>[0.83]   | Drugs<br>[3.73]      | Anxiety<br>[1.07]    | Conduct<br>[1.33]    | Self Harm<br>[1.04] | Back Pain<br>[0.8]  | Neonatal<br>[0.96]   | Violence<br>[2.98]   |
| Utah                   | Drugs<br>[6.1]       | Depression<br>[2.24] | Headaches<br>[1.01]  | Self Harm<br>[1.89]  | Anxiety<br>[1.06]    | Road Inj<br>[0.65]   | Conduct<br>[1.19]   | Back Pain<br>[0.83] | Neonatal<br>[0.81]   | Oth MSK<br>[5.26]    |
| Vermont                | Drugs<br>[5.45]      | Depression<br>[1.89] | Headaches<br>[1.04]  | Road Inj<br>[0.79]   | Anxiety<br>[1.04]    | Conduct<br>[1.23]    | Self Harm<br>[1.13] | Back Pain<br>[0.77] | Neonatal<br>[0.93]   | Oth MSK<br>[5.43]    |
| Virginia               | Depression<br>[1.98] | Drugs<br>[4.39]      | Headaches<br>[1.03]  | Road Inj<br>[0.71]   | Anxiety<br>[1.04]    | Conduct<br>[1.22]    | Self Harm<br>[1.11] | Back Pain<br>[0.75] | Neonatal<br>[0.95]   | Dermatitis<br>[1.33] |
| Washington             | Drugs<br>[5.36]      | Depression<br>[2.03] | Headaches<br>[1.02]  | Anxiety<br>[1.03]    | Conduct<br>[1.22]    | Self Harm<br>[1.29]  | Road Inj<br>[0.55]  | Back Pain<br>[0.83] | Oth MSK<br>[6.64]    | Neonatal<br>[0.81]   |
| W Virginia             | Drugs<br>[12.62]     | Road Inj<br>[1.15]   | Depression<br>[2.0]  | Headaches<br>[1.01]  | Anxiety<br>[1.09]    | Conduct<br>[1.16]    | Self Harm<br>[1.22] | Back Pain<br>[0.92] | Neonatal<br>[0.83]   | Oth MSK<br>[5.37]    |
| Wisconsin              | Drugs<br>[5.45]      | Depression<br>[1.97] | Headaches<br>[1.02]  | Road Inj<br>[0.71]   | Anxiety<br>[1.04]    | Conduct<br>[1.21]    | Back Pain<br>[0.94] | Self Harm<br>[1.26] | Neonatal<br>[0.93]   | Oth MSK<br>[5.61]    |
| Wyoming                | Road Inj<br>[1.18]   | Depression<br>[2.08] | Headaches<br>[1.01]  | Self Harm<br>[2.0]   | Drugs<br>[4.06]      | Back Pain<br>[1.15]  | Anxiety<br>[1.04]   | Conduct<br>[1.22]   | Oth MSK<br>[6.28]    | Neonatal<br>[0.71]   |
| Southern Latin America | Anxiety<br>[1.36]    | Road Inj<br>[0.67]   | Back Pain<br>[1.36]  | Depression<br>[1.38] | Self Harm<br>[1.33]  | Headaches<br>[0.66]  | Conduct<br>[0.93]   | Neonatal<br>[0.99]  | Violence<br>[1.67]   | Dermatitis<br>[1.02] |
| Argentina              | Road Inj<br>[0.74]   | Anxiety<br>[1.38]    | Self Harm<br>[1.46]  | Back Pain<br>[1.23]  | Depression<br>[1.35] | Headaches<br>[0.63]  | Conduct<br>[0.93]   | Violence<br>[1.73]  | Neonatal<br>[0.97]   | Drugs<br>[1.62]      |
| Chile                  | Back Pain<br>[1.8]   | Anxiety<br>[1.32]    | Depression<br>[1.51] | Headaches<br>[0.71]  | Road Inj<br>[0.47]   | Conduct<br>[0.92]    | Neonatal<br>[1.01]  | Self Harm<br>[0.94] | Dermatitis<br>[1.22] | Violence<br>[1.43]   |
| Uruguay                | Road Inj<br>[0.73]   | Anxiety<br>[1.39]    | Self Harm<br>[1.26]  | Headaches<br>[0.67]  | Back Pain<br>[1.08]  | Depression<br>[1.12] | Conduct<br>[0.93]   | Neonatal<br>[1.03]  | Violence<br>[1.53]   | Drown<br>[0.89]      |

**eFigure 7e. Leading ten causes of DALYs with the ratio of observed DALYs to DALYs expected on the basis of Socio-Demographic Index alone in 2017, 10-19 years, both sexes combined.** The top ten causes contributing to DALYs are listed globally, by socio-demographic quintile, and then by GBD superregion, region, country, and subnationally where modeled. For each cell, the ratio of observed DALYs to DALYs expected on the basis of socio-demographic index (SDI) alone are listed. Abbreviations: DALY=disability-adjusted life year, GBD=Global Burden of Disease.

Values shown in brackets represent the ratio of observed DALYs to predicted DALYs on the basis of Socio-Demographic Index (SDI), rounded to two (2) digits. Color ranges (shown below) were calculated to place a roughly equal number of cells into each bin.

| COLOR KEY:            |                     | [0.0-0.73]          | [0.73-0.88]          | [0.88-0.95]          | [0.95-1.01]          | [1.01-1.09]          | [1.09-1.26]          | [1.26-1.55]          | [1.55-2.09]          | 2.09+                |
|-----------------------|---------------------|---------------------|----------------------|----------------------|----------------------|----------------------|----------------------|----------------------|----------------------|----------------------|
|                       | 1                   | 2                   | 3                    | 4                    | 5                    | 6                    | 7                    | 8                    | 9                    | 10                   |
| <b>Western Europe</b> | Headaches<br>[1.0]  | Anxiety<br>[1.24]   | Back Pain<br>[1.1]   | Depression<br>[1.09] | Conduct<br>[0.91]    | Road Inj<br>[0.38]   | Neonatal<br>[0.81]   | Acne<br>[1.34]       | Dermatitis<br>[1.13] | Asthma<br>[1.08]     |
| Andorra               | Headaches<br>[1.02] | Anxiety<br>[1.14]   | Back Pain<br>[1.06]  | Depression<br>[1.05] | Conduct<br>[0.92]    | Dermatitis<br>[1.4]  | Acne<br>[1.27]       | Neonatal<br>[0.84]   | Road Inj<br>[0.39]   | Asthma<br>[1.2]      |
| Austria               | Headaches<br>[1.04] | Anxiety<br>[1.17]   | Neonatal<br>[1.36]   | Back Pain<br>[0.86]  | Road Inj<br>[0.46]   | Conduct<br>[0.89]    | Depression<br>[0.77] | Acne<br>[1.35]       | Self Harm<br>[0.74]  | Falls<br>[0.91]      |
| Belgium               | Headaches<br>[1.25] | Anxiety<br>[1.13]   | Back Pain<br>[0.94]  | Depression<br>[1.05] | Conduct<br>[0.91]    | Road Inj<br>[0.41]   | Acne<br>[1.14]       | Falls<br>[0.93]      | Dermatitis<br>[0.95] | Self Harm<br>[0.63]  |
| Cyprus                | Headaches<br>[1.02] | Road Inj<br>[0.83]  | Anxiety<br>[1.18]    | Back Pain<br>[1.13]  | Neonatal<br>[1.09]   | Depression<br>[1.0]  | Conduct<br>[0.89]    | Acne<br>[1.29]       | Falls<br>[0.86]      | Asthma<br>[0.94]     |
| Denmark               | Back Pain<br>[1.38] | Anxiety<br>[1.13]   | Headaches<br>[0.85]  | Conduct<br>[0.91]    | Dermatitis<br>[1.45] | Depression<br>[0.79] | Acne<br>[1.2]        | Road Inj<br>[0.35]   | Neonatal<br>[0.66]   | Asthma<br>[1.03]     |
| Finland               | Headaches<br>[1.01] | Neonatal<br>[1.7]   | Depression<br>[1.37] | Anxiety<br>[0.83]    | Conduct<br>[0.9]     | Dermatitis<br>[1.48] | Road Inj<br>[0.44]   | Back Pain<br>[0.62]  | Acne<br>[1.27]       | Self Harm<br>[0.9]   |
| France                | Anxiety<br>[1.41]   | Headaches<br>[0.83] | Back Pain<br>[1.08]  | Depression<br>[1.12] | Conduct<br>[0.9]     | Road Inj<br>[0.42]   | Acne<br>[1.48]       | Dermatitis<br>[1.31] | Neonatal<br>[0.64]   | Asthma<br>[1.05]     |
| Germany               | Anxiety<br>[1.4]    | Back Pain<br>[1.38] | Headaches<br>[0.87]  | Depression<br>[1.04] | Conduct<br>[0.9]     | Road Inj<br>[0.44]   | Neonatal<br>[0.92]   | Acne<br>[1.16]       | Falls<br>[0.84]      | Dermatitis<br>[0.91] |
| Greece                | Headaches<br>[1.19] | Anxiety<br>[1.33]   | Depression<br>[1.35] | Road Inj<br>[0.62]   | Back Pain<br>[0.95]  | Conduct<br>[0.87]    | Neonatal<br>[0.86]   | Acne<br>[1.49]       | Congenital<br>[0.89] | Falls<br>[0.89]      |
| Iceland               | Headaches<br>[1.02] | Anxiety<br>[1.14]   | Back Pain<br>[1.01]  | Dermatitis<br>[1.55] | Conduct<br>[0.92]    | Depression<br>[0.88] | Asthma<br>[1.6]      | Acne<br>[1.3]        | Neonatal<br>[0.85]   | Road Inj<br>[0.4]    |
| Ireland               | Headaches<br>[1.01] | Anxiety<br>[1.27]   | Depression<br>[1.21] | Back Pain<br>[0.81]  | Conduct<br>[0.9]     | Asthma<br>[1.42]     | Acne<br>[1.27]       | Dermatitis<br>[1.22] | Neonatal<br>[0.72]   | Road Inj<br>[0.31]   |
| Israel                | Headaches<br>[0.99] | Back Pain<br>[1.17] | Depression<br>[1.14] | Anxiety<br>[0.74]    | Neonatal<br>[0.95]   | Conduct<br>[0.87]    | Road Inj<br>[0.38]   | Acne<br>[1.29]       | Blindness<br>[3.01]  | Dermatitis<br>[1.03] |
| Italy                 | Headaches<br>[1.24] | Anxiety<br>[1.26]   | Back Pain<br>[1.01]  | Depression<br>[1.08] | Conduct<br>[0.89]    | Road Inj<br>[0.41]   | Acne<br>[1.39]       | Neonatal<br>[0.64]   | Dermatitis<br>[0.94] | Congenital<br>[0.8]  |
| Luxembourg            | Headaches<br>[1.17] | Anxiety<br>[1.13]   | Back Pain<br>[0.99]  | Neonatal<br>[1.1]    | Road Inj<br>[0.52]   | Depression<br>[0.96] | Conduct<br>[0.93]    | Dermatitis<br>[1.41] | Acne<br>[1.27]       | Asthma<br>[1.28]     |
| Malta                 | Headaches<br>[1.02] | Anxiety<br>[1.21]   | Back Pain<br>[1.12]  | Depression<br>[1.02] | Conduct<br>[0.87]    | Acne<br>[1.37]       | Congenital<br>[1.07] | Falls<br>[1.06]      | Road Inj<br>[0.33]   | Neonatal<br>[0.71]   |
| Netherlands           | Anxiety<br>[1.39]   | Headaches<br>[1.06] | Depression<br>[1.08] | Back Pain<br>[0.8]   | Conduct<br>[1.01]    | Acne<br>[1.27]       | Neonatal<br>[0.85]   | Dermatitis<br>[1.25] | Asthma<br>[1.16]     | Road Inj<br>[0.32]   |
| Norway                | Anxiety<br>[1.58]   | Headaches<br>[1.07] | Back Pain<br>[0.95]  | Depression<br>[1.02] | Conduct<br>[1.0]     | Neonatal<br>[1.0]    | Dermatitis<br>[1.44] | Acne<br>[1.29]       | Asthma<br>[1.46]     | Falls<br>[1.02]      |
| Portugal              | Headaches<br>[1.0]  | Anxiety<br>[1.27]   | Depression<br>[1.28] | Back Pain<br>[1.11]  | Conduct<br>[0.85]    | Asthma<br>[1.53]     | Road Inj<br>[0.36]   | Acne<br>[1.49]       | Neonatal<br>[0.6]    | Dermatitis<br>[0.86] |
| Spain                 | Headaches<br>[1.18] | Anxiety<br>[1.15]   | Back Pain<br>[1.19]  | Depression<br>[1.03] | Conduct<br>[0.88]    | Acne<br>[1.36]       | Neonatal<br>[0.7]    | Road Inj<br>[0.3]    | Falls<br>[0.85]      | Drugs<br>[1.3]       |
| Sweden                | Headaches<br>[1.06] | Anxiety<br>[1.14]   | Depression<br>[1.22] | Back Pain<br>[0.92]  | Dermatitis<br>[1.85] | Conduct<br>[1.01]    | Acne<br>[1.51]       | Asthma<br>[1.6]      | Falls<br>[1.01]      | Neonatal<br>[0.75]   |
| Stockholm             | Headaches<br>[1.06] | Anxiety<br>[1.12]   | Conduct<br>[1.04]    | Depression<br>[0.99] | Acne<br>[1.43]       | Dermatitis<br>[1.46] | Back Pain<br>[0.61]  | Asthma<br>[1.38]     | Falls<br>[0.96]      | Neonatal<br>[0.73]   |
| Sweden w/o Stockholm  | Headaches<br>[1.06] | Anxiety<br>[1.15]   | Depression<br>[1.28] | Back Pain<br>[1.01]  | Dermatitis<br>[1.96] | Conduct<br>[1.0]     | Asthma<br>[1.66]     | Acne<br>[1.53]       | Neonatal<br>[0.76]   | Falls<br>[1.03]      |
| Switzerland           | Back Pain<br>[2.12] | Anxiety<br>[1.15]   | Headaches<br>[0.86]  | Depression<br>[0.95] | Conduct<br>[0.91]    | Dermatitis<br>[1.4]  | Neonatal<br>[0.83]   | Acne<br>[1.28]       | Asthma<br>[1.07]     | Road Inj<br>[0.3]    |
| UK                    | Headaches<br>[0.93] | Anxiety<br>[1.04]   | Depression<br>[1.11] | Back Pain<br>[0.92]  | Conduct<br>[0.98]    | Asthma<br>[1.73]     | Neonatal<br>[0.98]   | Dermatitis<br>[1.56] | Drugs<br>[2.01]      | Acne<br>[1.33]       |
| England               | Headaches<br>[0.92] | Anxiety<br>[1.0]    | Back Pain<br>[0.92]  | Depression<br>[1.1]  | Conduct<br>[1.0]     | Asthma<br>[1.75]     | Neonatal<br>[1.01]   | Dermatitis<br>[1.59] | Drugs<br>[2.01]      | Acne<br>[1.32]       |
| E Midlands            | Headaches<br>[0.93] | Anxiety<br>[1.02]   | Depression<br>[1.1]  | Back Pain<br>[0.93]  | Conduct<br>[0.99]    | Asthma<br>[1.67]     | Neonatal<br>[0.96]   | Dermatitis<br>[1.55] | Drugs<br>[2.02]      | Road Inj<br>[0.35]   |
| Derby                 | Headaches<br>[0.92] | Anxiety<br>[1.01]   | Back Pain<br>[0.94]  | Depression<br>[1.09] | Conduct<br>[1.0]     | Asthma<br>[1.67]     | Neonatal<br>[0.96]   | Dermatitis<br>[1.55] | Drugs<br>[2.12]      | Acne<br>[1.3]        |
| Derbyshire            | Headaches<br>[0.92] | Anxiety<br>[1.04]   | Depression<br>[1.1]  | Conduct<br>[0.98]    | Back Pain<br>[0.83]  | Asthma<br>[1.66]     | Dermatitis<br>[1.56] | Neonatal<br>[0.89]   | Drugs<br>[2.08]      | Road Inj<br>[0.35]   |
| Leicester             | Headaches<br>[0.93] | Anxiety<br>[1.01]   | Back Pain<br>[0.95]  | Depression<br>[1.11] | Conduct<br>[0.99]    | Asthma<br>[1.7]      | Dermatitis<br>[1.55] | Drugs<br>[2.1]       | Neonatal<br>[0.82]   | Acne<br>[1.32]       |
| Leicestershire        | Headaches<br>[0.93] | Anxiety<br>[1.01]   | Back Pain<br>[0.95]  | Depression<br>[1.1]  | Conduct<br>[1.0]     | Dermatitis<br>[1.55] | Asthma<br>[1.64]     | Drugs<br>[1.93]      | Neonatal<br>[0.8]    | Acne<br>[1.39]       |

**eFigure 7e. Leading ten causes of DALYs with the ratio of observed DALYs to DALYs expected on the basis of Socio-Demographic Index alone in 2017, 10-19 years, both sexes combined.** The top ten causes contributing to DALYs are listed globally, by socio-demographic quintile, and then by GBD superregion, region, country, and subnationally where modeled. For each cell, the ratio of observed DALYs to DALYs expected on the basis of socio-demographic index (SDI) alone are listed. Abbreviations: DALY=disability-adjusted life year, GBD=Global Burden of Disease.

Values shown in brackets represent the ratio of observed DALYs to predicted DALYs on the basis of Socio-Demographic Index (SDI), rounded to two (2) digits. Color ranges (shown below) were calculated to place a roughly equal number of cells into each bin.

| COLOR KEY:           |                     | [0.0-0.73]        | (0.73-0.88]          | (0.88-0.95]          | (0.95-1.01]          | (1.01-1.09]          | (1.09-1.26]          | (1.26-1.55]          | (1.55-2.09]          | 2.09+              |
|----------------------|---------------------|-------------------|----------------------|----------------------|----------------------|----------------------|----------------------|----------------------|----------------------|--------------------|
|                      | 1                   | 2                 | 3                    | 4                    | 5                    | 6                    | 7                    | 8                    | 9                    | 10                 |
| Lincolnshire         | Headaches<br>[0.93] | Anxiety<br>[1.05] | Back Pain<br>[0.96]  | Depression<br>[1.11] | Conduct<br>[0.97]    | Road Inj<br>[0.46]   | Asthma<br>[1.68]     | Neonatal<br>[0.96]   | Dermatitis<br>[1.55] | Drugs<br>[2.1]     |
| Northamptonshire     | Headaches<br>[0.91] | Anxiety<br>[1.02] | Back Pain<br>[0.94]  | Depression<br>[1.08] | Conduct<br>[0.99]    | Neonatal<br>[1.06]   | Asthma<br>[1.67]     | Dermatitis<br>[1.57] | Drugs<br>[1.99]      | Road Inj<br>[0.36] |
| Nottingham           | Headaches<br>[0.96] | Anxiety<br>[1.0]  | Back Pain<br>[0.97]  | Depression<br>[1.13] | Neonatal<br>[1.16]   | Conduct<br>[1.0]     | Asthma<br>[1.74]     | Dermatitis<br>[1.54] | Drugs<br>[2.04]      | Acne<br>[1.3]      |
| Nottinghamshire      | Headaches<br>[0.91] | Anxiety<br>[1.03] | Back Pain<br>[0.95]  | Depression<br>[1.09] | Conduct<br>[0.98]    | Neonatal<br>[1.07]   | Asthma<br>[1.67]     | Dermatitis<br>[1.55] | Drugs<br>[1.93]      | Acne<br>[1.39]     |
| Rutland              | Headaches<br>[0.93] | Anxiety<br>[1.01] | Back Pain<br>[0.96]  | Depression<br>[1.12] | Conduct<br>[0.99]    | Dermatitis<br>[1.53] | Asthma<br>[1.61]     | Drugs<br>[1.95]      | Road Inj<br>[0.37]   | Acne<br>[1.42]     |
| E England            | Headaches<br>[0.92] | Anxiety<br>[1.01] | Depression<br>[1.09] | Back Pain<br>[0.92]  | Conduct<br>[1.0]     | Asthma<br>[1.65]     | Dermatitis<br>[1.55] | Neonatal<br>[0.92]   | Drugs<br>[1.94]      | Acne<br>[1.37]     |
| Bedford              | Headaches<br>[0.92] | Anxiety<br>[1.01] | Back Pain<br>[0.94]  | Depression<br>[1.09] | Neonatal<br>[1.13]   | Conduct<br>[0.99]    | Dermatitis<br>[1.55] | Asthma<br>[1.64]     | Drugs<br>[2.09]      | Acne<br>[1.35]     |
| Cambridgeshire       | Headaches<br>[0.93] | Anxiety<br>[0.99] | Depression<br>[1.1]  | Back Pain<br>[0.86]  | Conduct<br>[1.02]    | Dermatitis<br>[1.55] | Asthma<br>[1.65]     | Neonatal<br>[0.92]   | Drugs<br>[1.88]      | Acne<br>[1.35]     |
| Cen Bedfordshire     | Headaches<br>[0.91] | Anxiety<br>[1.01] | Back Pain<br>[0.92]  | Depression<br>[1.08] | Conduct<br>[1.0]     | Neonatal<br>[1.0]    | Dermatitis<br>[1.56] | Asthma<br>[1.64]     | Drugs<br>[1.87]      | Acne<br>[1.37]     |
| Essex                | Headaches<br>[0.92] | Anxiety<br>[1.02] | Back Pain<br>[0.93]  | Depression<br>[1.09] | Conduct<br>[0.99]    | Dermatitis<br>[1.55] | Asthma<br>[1.64]     | Neonatal<br>[0.91]   | Drugs<br>[1.96]      | Acne<br>[1.4]      |
| Hertfordshire        | Headaches<br>[0.92] | Anxiety<br>[0.99] | Back Pain<br>[0.91]  | Depression<br>[1.08] | Conduct<br>[1.02]    | Dermatitis<br>[1.56] | Asthma<br>[1.63]     | Neonatal<br>[0.9]    | Acne<br>[1.3]        | Drugs<br>[1.75]    |
| Luton                | Headaches<br>[0.91] | Anxiety<br>[1.01] | Back Pain<br>[0.92]  | Depression<br>[1.07] | Conduct<br>[1.0]     | Neonatal<br>[1.04]   | Asthma<br>[1.71]     | Dermatitis<br>[1.57] | Drugs<br>[1.84]      | Acne<br>[1.28]     |
| Norfolk              | Headaches<br>[0.93] | Anxiety<br>[1.03] | Back Pain<br>[0.95]  | Depression<br>[1.1]  | Conduct<br>[0.98]    | Asthma<br>[1.65]     | Dermatitis<br>[1.55] | Drugs<br>[2.19]      | Neonatal<br>[0.78]   | Acne<br>[1.43]     |
| Peterborough         | Headaches<br>[0.91] | Anxiety<br>[1.03] | Back Pain<br>[0.93]  | Depression<br>[1.07] | Conduct<br>[0.99]    | Asthma<br>[1.75]     | Dermatitis<br>[1.56] | Drugs<br>[2.17]      | Road Inj<br>[0.37]   | Neonatal<br>[0.73] |
| Southend-on-Sea      | Headaches<br>[0.91] | Anxiety<br>[1.04] | Depression<br>[1.09] | Back Pain<br>[0.92]  | Neonatal<br>[1.11]   | Conduct<br>[0.98]    | Asthma<br>[1.65]     | Dermatitis<br>[1.56] | Drugs<br>[2.29]      | Acne<br>[1.4]      |
| Suffolk              | Headaches<br>[0.91] | Anxiety<br>[1.03] | Depression<br>[1.09] | Back Pain<br>[0.93]  | Conduct<br>[0.98]    | Neonatal<br>[0.97]   | Dermatitis<br>[1.55] | Asthma<br>[1.63]     | Drugs<br>[1.99]      | Acne<br>[1.42]     |
| Thurrock             | Headaches<br>[0.91] | Anxiety<br>[1.04] | Depression<br>[1.08] | Back Pain<br>[0.91]  | Conduct<br>[0.98]    | Neonatal<br>[1.03]   | Asthma<br>[1.73]     | Dermatitis<br>[1.57] | Drugs<br>[1.83]      | Acne<br>[1.39]     |
| Greater London       | Headaches<br>[0.93] | Anxiety<br>[0.97] | Back Pain<br>[0.91]  | Depression<br>[1.08] | Asthma<br>[1.96]     | Conduct<br>[1.04]    | Neonatal<br>[1.04]   | Dermatitis<br>[1.58] | Drugs<br>[1.84]      | Acne<br>[1.2]      |
| Barking & Dagenham   | Headaches<br>[0.9]  | Anxiety<br>[1.04] | Dermatitis<br>[2.06] | Back Pain<br>[0.94]  | Depression<br>[1.07] | Asthma<br>[1.93]     | Conduct<br>[0.98]    | Neonatal<br>[1.02]   | Drugs<br>[2.01]      | Acne<br>[1.34]     |
| Barnet               | Headaches<br>[0.91] | Anxiety<br>[0.99] | Back Pain<br>[0.91]  | Depression<br>[1.07] | Asthma<br>[1.9]      | Conduct<br>[1.02]    | Neonatal<br>[0.98]   | Dermatitis<br>[1.56] | Drugs<br>[1.85]      | Acne<br>[1.3]      |
| Bexley               | Headaches<br>[0.92] | Anxiety<br>[1.03] | Back Pain<br>[0.95]  | Depression<br>[1.1]  | Asthma<br>[1.93]     | Conduct<br>[0.98]    | Dermatitis<br>[1.56] | Neonatal<br>[0.95]   | Drugs<br>[1.85]      | Acne<br>[1.41]     |
| Brent                | Headaches<br>[0.91] | Anxiety<br>[1.0]  | Back Pain<br>[0.92]  | Depression<br>[1.07] | Asthma<br>[1.94]     | Conduct<br>[1.01]    | Neonatal<br>[1.05]   | Dermatitis<br>[1.56] | Drugs<br>[1.88]      | Acne<br>[1.32]     |
| Bromley              | Headaches<br>[0.92] | Anxiety<br>[1.0]  | Back Pain<br>[0.93]  | Depression<br>[1.08] | Neonatal<br>[1.12]   | Asthma<br>[1.9]      | Conduct<br>[1.0]     | Dermatitis<br>[1.56] | Drugs<br>[1.82]      | Acne<br>[1.35]     |
| Camden               | Headaches<br>[0.97] | Anxiety<br>[0.96] | Back Pain<br>[0.94]  | Depression<br>[1.13] | Asthma<br>[1.98]     | Drugs<br>[2.29]      | Conduct<br>[1.05]    | Dermatitis<br>[1.57] | Neonatal<br>[0.88]   | Acne<br>[1.24]     |
| Croydon              | Headaches<br>[0.92] | Anxiety<br>[1.02] | Back Pain<br>[0.93]  | Depression<br>[1.08] | Asthma<br>[1.95]     | Conduct<br>[0.99]    | Neonatal<br>[1.01]   | Dermatitis<br>[1.57] | Drugs<br>[1.84]      | Acne<br>[1.34]     |
| Ealing               | Headaches<br>[0.91] | Anxiety<br>[0.99] | Back Pain<br>[0.91]  | Depression<br>[1.07] | Asthma<br>[1.95]     | Neonatal<br>[1.13]   | Conduct<br>[1.02]    | Dermatitis<br>[1.57] | Drugs<br>[1.77]      | Acne<br>[1.27]     |
| Enfield              | Headaches<br>[0.91] | Anxiety<br>[1.01] | Back Pain<br>[0.93]  | Depression<br>[1.07] | Asthma<br>[1.9]      | Conduct<br>[1.0]     | Neonatal<br>[1.05]   | Dermatitis<br>[1.56] | Drugs<br>[1.78]      | Acne<br>[1.34]     |
| Greenwich            | Headaches<br>[0.92] | Anxiety<br>[1.02] | Back Pain<br>[0.94]  | Depression<br>[1.09] | Asthma<br>[1.92]     | Conduct<br>[0.99]    | Neonatal<br>[0.97]   | Dermatitis<br>[1.56] | Drugs<br>[2.04]      | Acne<br>[1.34]     |
| Hackney              | Headaches<br>[0.93] | Anxiety<br>[0.98] | Asthma<br>[2.09]     | Back Pain<br>[0.92]  | Depression<br>[1.08] | Conduct<br>[1.03]    | Neonatal<br>[1.01]   | Dermatitis<br>[1.57] | Drugs<br>[2.1]       | Acne<br>[1.21]     |
| Hammersmith & Fulham | Headaches<br>[0.95] | Anxiety<br>[0.95] | Back Pain<br>[0.91]  | Depression<br>[1.1]  | Asthma<br>[1.99]     | Conduct<br>[1.06]    | Drugs<br>[2.13]      | Neonatal<br>[0.99]   | Dermatitis<br>[1.58] | Acne<br>[1.19]     |
| Haringey             | Headaches<br>[0.91] | Anxiety<br>[1.0]  | Back Pain<br>[0.92]  | Depression<br>[1.07] | Asthma<br>[1.96]     | Neonatal<br>[1.1]    | Conduct<br>[1.01]    | Dermatitis<br>[1.56] | Drugs<br>[1.89]      | Acne<br>[1.29]     |

**eFigure 7e. Leading ten causes of DALYs with the ratio of observed DALYs to DALYs expected on the basis of Socio-Demographic Index alone in 2017, 10-19 years, both sexes combined.** The top ten causes contributing to DALYs are listed globally, by socio-demographic quintile, and then by GBD superregion, region, country, and subnationally where modeled. For each cell, the ratio of observed DALYs to DALYs expected on the basis of socio-demographic index (SDI) alone are listed. Abbreviations: DALY=disability-adjusted life year, GBD=Global Burden of Disease.

Values shown in brackets represent the ratio of observed DALYs to predicted DALYs on the basis of Socio-Demographic Index (SDI), rounded to two (2) digits. Color ranges (shown below) were calculated to place a roughly equal number of cells into each bin.

| COLOR KEY:           |                     | [0.0-0.73]        | [0.73-0.88]          | [0.88-0.95]          | [0.95-1.01]          | [1.01-1.09]          | [1.09-1.26]          | [1.26-1.55]          | [1.55-2.09]          | 2.09+                |
|----------------------|---------------------|-------------------|----------------------|----------------------|----------------------|----------------------|----------------------|----------------------|----------------------|----------------------|
|                      | 1                   | 2                 | 3                    | 4                    | 5                    | 6                    | 7                    | 8                    | 9                    | 10                   |
| Harrow               | Headaches<br>[0.91] | Anxiety<br>[1.0]  | Back Pain<br>[0.92]  | Depression<br>[1.08] | Neonatal<br>[1.15]   | Asthma<br>[1.9]      | Conduct<br>[1.01]    | Dermatitis<br>[1.56] | Drugs<br>[1.79]      | Acne<br>[1.34]       |
| Havering             | Headaches<br>[0.93] | Anxiety<br>[1.03] | Back Pain<br>[0.96]  | Depression<br>[1.1]  | Asthma<br>[1.93]     | Conduct<br>[0.98]    | Neonatal<br>[1.0]    | Dermatitis<br>[1.55] | Drugs<br>[1.92]      | Acne<br>[1.4]        |
| Hillingdon           | Headaches<br>[0.93] | Anxiety<br>[0.98] | Back Pain<br>[0.93]  | Depression<br>[1.1]  | Asthma<br>[2.0]      | Neonatal<br>[1.15]   | Conduct<br>[1.02]    | Dermatitis<br>[1.56] | Drugs<br>[1.9]       | Acne<br>[1.29]       |
| Hounslow             | Headaches<br>[0.92] | Anxiety<br>[0.98] | Back Pain<br>[0.91]  | Depression<br>[1.08] | Asthma<br>[1.96]     | Conduct<br>[1.03]    | Neonatal<br>[1.09]   | Dermatitis<br>[1.57] | Drugs<br>[1.79]      | Acne<br>[1.24]       |
| Islington            | Headaches<br>[0.96] | Anxiety<br>[0.96] | Back Pain<br>[0.93]  | Asthma<br>[2.07]     | Depression<br>[1.11] | Drugs<br>[2.4]       | Conduct<br>[1.04]    | Dermatitis<br>[1.58] | Neonatal<br>[0.86]   | Acne<br>[1.2]        |
| Kensington & Chelsea | Headaches<br>[0.96] | Anxiety<br>[0.95] | Back Pain<br>[0.92]  | Depression<br>[1.12] | Asthma<br>[1.97]     | Drugs<br>[2.27]      | Conduct<br>[1.05]    | Dermatitis<br>[1.58] | Acne<br>[1.25]       | Neonatal<br>[0.85]   |
| Kingston upon Thames | Headaches<br>[0.95] | Anxiety<br>[0.98] | Back Pain<br>[0.93]  | Depression<br>[1.11] | Asthma<br>[1.95]     | Neonatal<br>[1.08]   | Conduct<br>[1.02]    | Dermatitis<br>[1.57] | Drugs<br>[1.97]      | Acne<br>[1.29]       |
| Lambeth              | Headaches<br>[0.94] | Anxiety<br>[0.97] | Back Pain<br>[0.91]  | Depression<br>[1.08] | Asthma<br>[1.98]     | Conduct<br>[1.04]    | Dermatitis<br>[1.58] | Drugs<br>[2.03]      | Acne<br>[1.19]       | Neonatal<br>[0.73]   |
| Lewisham             | Headaches<br>[0.92] | Anxiety<br>[1.01] | Neonatal<br>[1.21]   | Back Pain<br>[0.93]  | Depression<br>[1.08] | Asthma<br>[1.95]     | Conduct<br>[1.0]     | Dermatitis<br>[1.56] | Drugs<br>[1.83]      | Acne<br>[1.29]       |
| Merton               | Headaches<br>[0.91] | Anxiety<br>[0.98] | Back Pain<br>[0.9]   | Depression<br>[1.07] | Asthma<br>[1.95]     | Conduct<br>[1.03]    | Neonatal<br>[1.04]   | Dermatitis<br>[1.56] | Acne<br>[1.26]       | Drugs<br>[1.69]      |
| Newham               | Headaches<br>[0.93] | Anxiety<br>[1.02] | Back Pain<br>[0.95]  | Depression<br>[1.1]  | Asthma<br>[1.94]     | Neonatal<br>[1.08]   | Conduct<br>[0.99]    | Dermatitis<br>[1.56] | Drugs<br>[1.89]      | Acne<br>[1.32]       |
| Redbridge            | Headaches<br>[0.9]  | Anxiety<br>[1.02] | Back Pain<br>[0.93]  | Depression<br>[1.07] | Asthma<br>[1.92]     | Conduct<br>[1.0]     | Neonatal<br>[1.01]   | Dermatitis<br>[1.56] | Drugs<br>[1.81]      | Acne<br>[1.34]       |
| Richmond upon Thames | Headaches<br>[0.93] | Anxiety<br>[0.97] | Back Pain<br>[0.9]   | Depression<br>[1.07] | Neonatal<br>[1.14]   | Asthma<br>[1.91]     | Conduct<br>[1.04]    | Dermatitis<br>[1.58] | Drugs<br>[1.76]      | Acne<br>[1.23]       |
| Southwark            | Headaches<br>[0.94] | Anxiety<br>[0.96] | Back Pain<br>[0.91]  | Depression<br>[1.1]  | Asthma<br>[1.99]     | Conduct<br>[1.05]    | Dermatitis<br>[1.58] | Drugs<br>[1.92]      | Acne<br>[1.19]       | Neonatal<br>[0.75]   |
| Sutton               | Headaches<br>[0.92] | Anxiety<br>[1.01] | Neonatal<br>[1.29]   | Back Pain<br>[0.93]  | Depression<br>[1.09] | Asthma<br>[1.93]     | Conduct<br>[1.0]     | Dermatitis<br>[1.56] | Drugs<br>[1.88]      | Acne<br>[1.35]       |
| Tower Hamlets        | Headaches<br>[0.94] | Anxiety<br>[0.96] | Back Pain<br>[0.92]  | Asthma<br>[2.03]     | Depression<br>[1.09] | Neonatal<br>[1.11]   | Conduct<br>[1.04]    | Dermatitis<br>[1.57] | Drugs<br>[1.91]      | Acne<br>[1.19]       |
| Waltham Forest       | Headaches<br>[0.91] | Anxiety<br>[1.03] | Back Pain<br>[0.93]  | Depression<br>[1.08] | Asthma<br>[1.91]     | Conduct<br>[0.99]    | Neonatal<br>[1.02]   | Dermatitis<br>[1.57] | Drugs<br>[2.01]      | Acne<br>[1.35]       |
| Wandsworth           | Headaches<br>[0.94] | Anxiety<br>[0.96] | Back Pain<br>[0.9]   | Depression<br>[1.09] | Asthma<br>[1.94]     | Conduct<br>[1.04]    | Dermatitis<br>[1.59] | Neonatal<br>[0.9]    | Drugs<br>[1.76]      | Acne<br>[1.19]       |
| Westminster          | Headaches<br>[0.95] | Anxiety<br>[0.95] | Back Pain<br>[0.93]  | Depression<br>[1.11] | Asthma<br>[2.04]     | Conduct<br>[1.06]    | Drugs<br>[2.14]      | Dermatitis<br>[1.56] | Acne<br>[1.23]       | Neonatal<br>[0.8]    |
| NE England           | Headaches<br>[0.92] | Anxiety<br>[1.03] | Depression<br>[1.1]  | Back Pain<br>[0.94]  | Conduct<br>[0.98]    | Dermatitis<br>[1.68] | Asthma<br>[1.7]      | Drugs<br>[2.25]      | Neonatal<br>[0.91]   | Congenital<br>[1.05] |
| County Durham        | Headaches<br>[0.93] | Anxiety<br>[1.04] | Depression<br>[1.11] | Dermatitis<br>[1.87] | Back Pain<br>[0.89]  | Conduct<br>[0.97]    | Asthma<br>[1.74]     | Neonatal<br>[0.98]   | Drugs<br>[2.17]      | Congenital<br>[1.03] |
| Darlington           | Headaches<br>[0.92] | Anxiety<br>[1.03] | Back Pain<br>[0.95]  | Depression<br>[1.09] | Conduct<br>[0.99]    | Asthma<br>[1.72]     | Dermatitis<br>[1.56] | Drugs<br>[2.25]      | Neonatal<br>[0.88]   | Road Inj<br>[0.37]   |
| Gateshead            | Headaches<br>[0.92] | Anxiety<br>[1.03] | Back Pain<br>[0.96]  | Depression<br>[1.1]  | Dermatitis<br>[1.85] | Drugs<br>[2.58]      | Conduct<br>[0.98]    | Neonatal<br>[1.01]   | Asthma<br>[1.74]     | Congenital<br>[1.08] |
| Hartlepool           | Headaches<br>[0.92] | Anxiety<br>[1.05] | Back Pain<br>[0.96]  | Depression<br>[1.11] | Conduct<br>[0.96]    | Neonatal<br>[1.05]   | Asthma<br>[1.75]     | Drugs<br>[2.5]       | Dermatitis<br>[1.55] | Congenital<br>[1.01] |
| Middlesbrough        | Headaches<br>[0.92] | Anxiety<br>[1.04] | Back Pain<br>[0.95]  | Depression<br>[1.1]  | Conduct<br>[0.97]    | Asthma<br>[1.74]     | Dermatitis<br>[1.55] | Drugs<br>[2.22]      | Neonatal<br>[0.8]    | Congenital<br>[1.01] |
| Newcastle upon Tyne  | Headaches<br>[0.96] | Anxiety<br>[0.99] | Back Pain<br>[0.97]  | Depression<br>[1.14] | Conduct<br>[1.0]     | Drugs<br>[2.29]      | Asthma<br>[1.74]     | Dermatitis<br>[1.53] | Neonatal<br>[0.84]   | Acne<br>[1.35]       |
| N Tyneside           | Headaches<br>[0.91] | Anxiety<br>[1.02] | Back Pain<br>[0.93]  | Depression<br>[1.08] | Conduct<br>[0.99]    | Asthma<br>[1.69]     | Dermatitis<br>[1.56] | Drugs<br>[2.17]      | Neonatal<br>[0.84]   | Congenital<br>[1.07] |
| Northumberland       | Headaches<br>[0.91] | Anxiety<br>[1.03] | Back Pain<br>[0.94]  | Depression<br>[1.09] | Conduct<br>[0.98]    | Asthma<br>[1.68]     | Dermatitis<br>[1.55] | Drugs<br>[2.24]      | Neonatal<br>[0.88]   | Congenital<br>[1.04] |
| Redcar & Cleveland   | Headaches<br>[0.92] | Anxiety<br>[1.05] | Depression<br>[1.1]  | Back Pain<br>[0.95]  | Conduct<br>[0.97]    | Asthma<br>[1.69]     | Dermatitis<br>[1.55] | Drugs<br>[2.2]       | Neonatal<br>[0.83]   | Road Inj<br>[0.34]   |
| S Tyneside           | Headaches<br>[0.93] | Anxiety<br>[1.06] | Back Pain<br>[0.96]  | Depression<br>[1.11] | Dermatitis<br>[1.87] | Conduct<br>[0.96]    | Asthma<br>[1.7]      | Drugs<br>[2.27]      | Neonatal<br>[0.88]   | Congenital<br>[1.0]  |
| Stockton-on-Tees     | Headaches<br>[0.91] | Anxiety<br>[1.02] | Back Pain<br>[0.94]  | Depression<br>[1.09] | Neonatal<br>[1.12]   | Conduct<br>[0.99]    | Asthma<br>[1.73]     | Dermatitis<br>[1.55] | Drugs<br>[2.24]      | Road Inj<br>[0.37]   |

**eFigure 7e. Leading ten causes of DALYs with the ratio of observed DALYs to DALYs expected on the basis of Socio-Demographic Index alone in 2017, 10-19 years, both sexes combined.** The top ten causes contributing to DALYs are listed globally, by socio-demographic quintile, and then by GBD superregion, region, country, and subnationally where modeled. For each cell, the ratio of observed DALYs to DALYs expected on the basis of socio-demographic index (SDI) alone are listed. Abbreviations: DALY=disability-adjusted life year, GBD=Global Burden of Disease.

Values shown in brackets represent the ratio of observed DALYs to predicted DALYs on the basis of Socio-Demographic Index (SDI), rounded to two (2) digits. Color ranges (shown below) were calculated to place a roughly equal number of cells into each bin.

| COLOR KEY:            |                     | [0.0-0.73]           | (0.73-0.88]          | (0.88-0.95]          | (0.95-1.01]          | (1.01-1.09]          | (1.09-1.26]          | (1.26-1.55]          | (1.55-2.09]          | 2.09+                |
|-----------------------|---------------------|----------------------|----------------------|----------------------|----------------------|----------------------|----------------------|----------------------|----------------------|----------------------|
|                       | 1                   | 2                    | 3                    | 4                    | 5                    | 6                    | 7                    | 8                    | 9                    | 10                   |
| Sunderland            | Headaches<br>[0.92] | Anxiety<br>[1.03]    | Back Pain<br>[0.95]  | Depression<br>[1.1]  | Dermatitis<br>[1.87] | Conduct<br>[0.98]    | Drugs<br>[2.2]       | Asthma<br>[1.53]     | Neonatal<br>[0.77]   | Congenital<br>[1.04] |
| NW England            | Headaches<br>[0.92] | Anxiety<br>[1.01]    | Depression<br>[1.11] | Back Pain<br>[0.93]  | Neonatal<br>[1.12]   | Conduct<br>[0.99]    | Asthma<br>[1.74]     | Dermatitis<br>[1.55] | Drugs<br>[2.24]      | Congenital<br>[1.06] |
| Blackburn with Darwen | Headaches<br>[0.91] | Anxiety<br>[1.05]    | Back Pain<br>[0.95]  | Depression<br>[1.08] | Neonatal<br>[1.11]   | Conduct<br>[0.98]    | Asthma<br>[1.74]     | Dermatitis<br>[1.56] | Drugs<br>[2.17]      | Acne<br>[1.35]       |
| Blackpool             | Headaches<br>[0.92] | Anxiety<br>[1.07]    | Drugs<br>[3.09]      | Back Pain<br>[0.97]  | Depression<br>[1.1]  | Neonatal<br>[1.08]   | Conduct<br>[0.96]    | Asthma<br>[1.78]     | Dermatitis<br>[1.57] | Congenital<br>[0.92] |
| Bolton                | Headaches<br>[0.91] | Anxiety<br>[1.04]    | Back Pain<br>[0.96]  | Depression<br>[1.09] | Conduct<br>[0.98]    | Neonatal<br>[1.06]   | Asthma<br>[1.71]     | Drugs<br>[2.4]       | Dermatitis<br>[1.55] | Congenital<br>[0.98] |
| Bury                  | Headaches<br>[0.9]  | Anxiety<br>[1.02]    | Back Pain<br>[0.95]  | Depression<br>[1.08] | Conduct<br>[0.99]    | Neonatal<br>[1.01]   | Asthma<br>[1.66]     | Dermatitis<br>[1.55] | Drugs<br>[2.16]      | Acne<br>[1.34]       |
| Cheshire E            | Headaches<br>[0.93] | Neonatal<br>[1.38]   | Anxiety<br>[0.99]    | Back Pain<br>[0.94]  | Depression<br>[1.09] | Conduct<br>[1.01]    | Asthma<br>[1.7]      | Dermatitis<br>[1.56] | Drugs<br>[1.91]      | Acne<br>[1.3]        |
| Cheshire W & Chester  | Headaches<br>[0.93] | Anxiety<br>[1.0]     | Back Pain<br>[0.94]  | Depression<br>[1.1]  | Neonatal<br>[1.12]   | Conduct<br>[1.0]     | Asthma<br>[1.72]     | Dermatitis<br>[1.55] | Drugs<br>[2.15]      | Road Inj<br>[0.4]    |
| Cumbria               | Headaches<br>[0.92] | Anxiety<br>[1.02]    | Back Pain<br>[0.94]  | Depression<br>[1.1]  | Neonatal<br>[1.11]   | Conduct<br>[0.99]    | Asthma<br>[1.72]     | Dermatitis<br>[1.55] | Drugs<br>[2.27]      | Road Inj<br>[0.41]   |
| Halton                | Headaches<br>[0.92] | Anxiety<br>[1.03]    | Back Pain<br>[0.93]  | Depression<br>[1.09] | Neonatal<br>[1.14]   | Conduct<br>[0.98]    | Asthma<br>[1.73]     | Dermatitis<br>[1.56] | Drugs<br>[2.14]      | Acne<br>[1.34]       |
| Knowsley              | Headaches<br>[0.92] | Anxiety<br>[1.03]    | Back Pain<br>[0.95]  | Depression<br>[1.1]  | Neonatal<br>[1.09]   | Asthma<br>[1.84]     | Conduct<br>[0.98]    | Drugs<br>[2.37]      | Dermatitis<br>[1.55] | Congenital<br>[1.21] |
| Lancashire            | Headaches<br>[0.93] | Anxiety<br>[1.02]    | Depression<br>[1.1]  | Back Pain<br>[0.88]  | Neonatal<br>[1.08]   | Conduct<br>[0.99]    | Asthma<br>[1.75]     | Dermatitis<br>[1.55] | Drugs<br>[2.24]      | Congenital<br>[1.07] |
| Liverpool             | Headaches<br>[0.96] | Depression<br>[1.31] | Anxiety<br>[0.93]    | Back Pain<br>[0.96]  | Neonatal<br>[1.21]   | Drugs<br>[2.55]      | Conduct<br>[0.98]    | Asthma<br>[1.74]     | Dermatitis<br>[1.54] | Congenital<br>[1.15] |
| Manchester            | Headaches<br>[0.95] | Anxiety<br>[0.98]    | Back Pain<br>[0.98]  | Neonatal<br>[1.2]    | Depression<br>[1.11] | Conduct<br>[1.02]    | Asthma<br>[1.77]     | Dermatitis<br>[1.55] | Drugs<br>[2.05]      | Acne<br>[1.22]       |
| Oldham                | Headaches<br>[0.91] | Anxiety<br>[1.05]    | Back Pain<br>[0.96]  | Depression<br>[1.09] | Asthma<br>[1.88]     | Conduct<br>[0.97]    | Dermatitis<br>[1.56] | Drugs<br>[2.36]      | Congenital<br>[1.13] | Neonatal<br>[0.83]   |
| Rochdale              | Headaches<br>[0.91] | Anxiety<br>[1.05]    | Back Pain<br>[0.96]  | Depression<br>[1.09] | Conduct<br>[0.97]    | Asthma<br>[1.78]     | Drugs<br>[2.47]      | Dermatitis<br>[1.56] | Neonatal<br>[0.86]   | Congenital<br>[1.0]  |
| Salford               | Headaches<br>[0.92] | Anxiety<br>[1.02]    | Neonatal<br>[1.25]   | Back Pain<br>[0.95]  | Depression<br>[1.09] | Conduct<br>[0.99]    | Asthma<br>[1.79]     | Dermatitis<br>[1.56] | Drugs<br>[2.23]      | Road Inj<br>[0.37]   |
| Sefton                | Headaches<br>[0.92] | Anxiety<br>[1.04]    | Back Pain<br>[0.94]  | Depression<br>[1.09] | Neonatal<br>[1.12]   | Conduct<br>[0.98]    | Drugs<br>[2.49]      | Asthma<br>[1.71]     | Dermatitis<br>[1.55] | Congenital<br>[1.08] |
| St Helens             | Headaches<br>[0.91] | Anxiety<br>[1.04]    | Back Pain<br>[0.95]  | Depression<br>[1.09] | Neonatal<br>[1.13]   | Conduct<br>[0.98]    | Asthma<br>[1.73]     | Drugs<br>[2.45]      | Dermatitis<br>[1.55] | Road Inj<br>[0.38]   |
| Stockport             | Headaches<br>[0.92] | Anxiety<br>[1.01]    | Back Pain<br>[0.93]  | Depression<br>[1.09] | Conduct<br>[1.0]     | Asthma<br>[1.69]     | Dermatitis<br>[1.56] | Neonatal<br>[0.94]   | Drugs<br>[2.09]      | Acne<br>[1.31]       |
| Tameside              | Headaches<br>[0.91] | Anxiety<br>[1.05]    | Depression<br>[1.09] | Conduct<br>[0.97]    | Asthma<br>[1.74]     | Dermatitis<br>[1.56] | Back Pain<br>[0.77]  | Neonatal<br>[0.92]   | Drugs<br>[2.19]      | Congenital<br>[0.95] |
| Trafford              | Headaches<br>[0.91] | Anxiety<br>[0.98]    | Neonatal<br>[1.22]   | Back Pain<br>[0.91]  | Depression<br>[1.07] | Conduct<br>[1.03]    | Asthma<br>[1.73]     | Dermatitis<br>[1.57] | Drugs<br>[1.79]      | Acne<br>[1.25]       |
| Warrington            | Headaches<br>[0.92] | Anxiety<br>[0.99]    | Neonatal<br>[1.3]    | Back Pain<br>[0.93]  | Depression<br>[1.09] | Conduct<br>[1.01]    | Asthma<br>[1.74]     | Dermatitis<br>[1.55] | Drugs<br>[2.15]      | Acne<br>[1.29]       |
| Wigan                 | Headaches<br>[0.91] | Anxiety<br>[1.04]    | Back Pain<br>[0.95]  | Depression<br>[1.08] | Neonatal<br>[1.13]   | Conduct<br>[0.98]    | Asthma<br>[1.72]     | Dermatitis<br>[1.55] | Drugs<br>[2.28]      | Congenital<br>[0.99] |
| Wirral                | Headaches<br>[0.91] | Anxiety<br>[1.04]    | Neonatal<br>[1.27]   | Back Pain<br>[0.94]  | Depression<br>[1.09] | Conduct<br>[0.98]    | Asthma<br>[1.7]      | Drugs<br>[2.39]      | Dermatitis<br>[1.55] | Congenital<br>[1.08] |
| SE England            | Headaches<br>[0.92] | Anxiety<br>[1.0]     | Depression<br>[1.09] | Back Pain<br>[0.91]  | Conduct<br>[1.0]     | Dermatitis<br>[1.71] | Asthma<br>[1.78]     | Neonatal<br>[1.03]   | Drugs<br>[1.91]      | Acne<br>[1.34]       |
| Bracknell Forest      | Headaches<br>[0.92] | Anxiety<br>[0.99]    | Back Pain<br>[0.91]  | Depression<br>[1.08] | Conduct<br>[1.02]    | Dermatitis<br>[1.56] | Asthma<br>[1.62]     | Acne<br>[1.32]       | Neonatal<br>[0.8]    | Drugs<br>[1.73]      |
| Brighton & Hove       | Headaches<br>[0.96] | Anxiety<br>[0.98]    | Depression<br>[1.13] | Back Pain<br>[0.93]  | Dermatitis<br>[1.85] | Drugs<br>[2.46]      | Neonatal<br>[1.12]   | Conduct<br>[1.01]    | Asthma<br>[1.66]     | Acne<br>[1.32]       |
| Buckinghamshire       | Headaches<br>[0.92] | Anxiety<br>[0.99]    | Back Pain<br>[0.92]  | Depression<br>[1.09] | Neonatal<br>[1.15]   | Conduct<br>[1.01]    | Dermatitis<br>[1.56] | Asthma<br>[1.62]     | Drugs<br>[1.83]      | Acne<br>[1.31]       |
| E Sussex              | Headaches<br>[0.92] | Anxiety<br>[1.04]    | Depression<br>[1.1]  | Back Pain<br>[0.94]  | Dermatitis<br>[1.83] | Neonatal<br>[1.1]    | Conduct<br>[0.97]    | Asthma<br>[1.57]     | Drugs<br>[2.17]      | Acne<br>[1.42]       |
| Hampshire             | Headaches<br>[0.92] | Asthma<br>[2.43]     | Anxiety<br>[1.0]     | Back Pain<br>[0.92]  | Depression<br>[1.09] | Conduct<br>[1.0]     | Neonatal<br>[1.01]   | Dermatitis<br>[1.56] | Acne<br>[1.38]       | Drugs<br>[1.84]      |

**Figure 7e. Leading ten causes of DALYs with the ratio of observed DALYs to DALYs expected on the basis of Socio-Demographic Index alone in 2017, 10-19 years, both sexes combined.** The top ten causes contributing to DALYs are listed globally, by socio-demographic quintile, and then by GBD superregion, region, country, and subnationally where modeled. For each cell, the ratio of observed DALYs to DALYs expected on the basis of socio-demographic index (SDI) alone are listed. Abbreviations: DALY=disability-adjusted life year, GBD=Global Burden of Disease.

Values shown in brackets represent the ratio of observed DALYs to predicted DALYs on the basis of Socio-Demographic Index (SDI), rounded to two (2) digits. Color ranges (shown below) were calculated to place a roughly equal number of cells into each bin.

| COLOR KEY:           |                     | [0.0-0.73]         | [0.73-0.88]          | [0.88-0.95]          | [0.95-1.01]          | [1.01-1.09]          | [1.09-1.26]          | [1.26-1.55]          | [1.55-2.09]          | 2.09+           |
|----------------------|---------------------|--------------------|----------------------|----------------------|----------------------|----------------------|----------------------|----------------------|----------------------|-----------------|
|                      | 1                   | 2                  | 3                    | 4                    | 5                    | 6                    | 7                    | 8                    | 9                    | 10              |
| Isle of Wight        | Headaches<br>[0.92] | Asthma<br>[2.43]   | Anxiety<br>[1.03]    | Depression<br>[1.1]  | Back Pain<br>[0.94]  | Conduct<br>[0.98]    | Neonatal<br>[0.95]   | Dermatitis<br>[1.5]  | Drugs<br>[2.1]       | Acne<br>[1.46]  |
| Kent                 | Headaches<br>[0.92] | Anxiety<br>[1.02]  | Back Pain<br>[0.93]  | Depression<br>[1.1]  | Dermatitis<br>[1.83] | Conduct<br>[0.99]    | Neonatal<br>[1.0]    | Asthma<br>[1.6]      | Drugs<br>[1.98]      | Acne<br>[1.39]  |
| Medway               | Headaches<br>[0.92] | Anxiety<br>[1.04]  | Depression<br>[1.1]  | Back Pain<br>[0.93]  | Neonatal<br>[1.07]   | Conduct<br>[0.97]    | Asthma<br>[1.65]     | Dermatitis<br>[1.55] | Drugs<br>[2.08]      | Acne<br>[1.4]   |
| Milton Keynes        | Headaches<br>[0.91] | Anxiety<br>[1.0]   | Back Pain<br>[0.9]   | Depression<br>[1.06] | Conduct<br>[1.02]    | Dermatitis<br>[1.58] | Asthma<br>[1.66]     | Neonatal<br>[0.88]   | Drugs<br>[1.73]      | Acne<br>[1.25]  |
| Oxfordshire          | Headaches<br>[0.94] | Anxiety<br>[0.98]  | Dermatitis<br>[2.04] | Back Pain<br>[0.92]  | Depression<br>[1.1]  | Conduct<br>[1.02]    | Asthma<br>[1.63]     | Neonatal<br>[0.93]   | Drugs<br>[1.84]      | Acne<br>[1.32]  |
| Portsmouth           | Headaches<br>[0.94] | Anxiety<br>[1.0]   | Depression<br>[1.12] | Back Pain<br>[0.93]  | Conduct<br>[1.0]     | Neonatal<br>[0.98]   | Drugs<br>[2.22]      | Asthma<br>[1.65]     | Dermatitis<br>[1.54] | Acne<br>[1.35]  |
| Reading              | Headaches<br>[0.94] | Anxiety<br>[0.97]  | Dermatitis<br>[2.06] | Neonatal<br>[1.21]   | Back Pain<br>[0.91]  | Depression<br>[1.1]  | Conduct<br>[1.03]    | Asthma<br>[1.69]     | Drugs<br>[2.0]       | Acne<br>[1.23]  |
| Slough               | Headaches<br>[0.9]  | Anxiety<br>[0.99]  | Back Pain<br>[0.89]  | Depression<br>[1.05] | Conduct<br>[1.02]    | Neonatal<br>[1.07]   | Asthma<br>[1.77]     | Dermatitis<br>[1.58] | Drugs<br>[1.83]      | Acne<br>[1.22]  |
| Southampton          | Headaches<br>[0.94] | Anxiety<br>[1.0]   | Depression<br>[1.12] | Back Pain<br>[0.93]  | Conduct<br>[1.0]     | Neonatal<br>[0.97]   | Asthma<br>[1.66]     | Dermatitis<br>[1.54] | Drugs<br>[2.14]      | Acne<br>[1.36]  |
| Surrey               | Headaches<br>[0.93] | Anxiety<br>[0.98]  | Depression<br>[1.09] | Dermatitis<br>[1.83] | Neonatal<br>[1.12]   | Back Pain<br>[0.84]  | Conduct<br>[1.03]    | Asthma<br>[1.62]     | Acne<br>[1.29]       | Drugs<br>[1.73] |
| West Berkshire       | Headaches<br>[0.92] | Anxiety<br>[0.99]  | Back Pain<br>[0.92]  | Depression<br>[1.09] | Conduct<br>[1.02]    | Dermatitis<br>[1.56] | Asthma<br>[1.66]     | Neonatal<br>[0.93]   | Acne<br>[1.32]       | Drugs<br>[1.76] |
| W Sussex             | Headaches<br>[0.91] | Anxiety<br>[1.0]   | Back Pain<br>[0.92]  | Depression<br>[1.08] | Conduct<br>[1.0]     | Asthma<br>[1.86]     | Neonatal<br>[1.05]   | Dermatitis<br>[1.62] | Drugs<br>[1.94]      | Acne<br>[1.35]  |
| Windsor & Maidenhead | Headaches<br>[0.92] | Anxiety<br>[0.96]  | Back Pain<br>[0.9]   | Depression<br>[1.07] | Conduct<br>[1.04]    | Dermatitis<br>[1.56] | Neonatal<br>[0.96]   | Asthma<br>[1.63]     | Acne<br>[1.24]       | Drugs<br>[1.71] |
| Wokingham            | Headaches<br>[0.92] | Anxiety<br>[0.97]  | Back Pain<br>[0.9]   | Depression<br>[1.08] | Conduct<br>[1.03]    | Neonatal<br>[0.99]   | Dermatitis<br>[1.57] | Asthma<br>[1.62]     | Acne<br>[1.27]       | Drugs<br>[1.63] |
| SW England           | Headaches<br>[0.93] | Anxiety<br>[1.01]  | Depression<br>[1.1]  | Back Pain<br>[0.93]  | Neonatal<br>[1.08]   | Conduct<br>[0.99]    | Dermatitis<br>[1.55] | Asthma<br>[1.64]     | Drugs<br>[2.04]      | Acne<br>[1.39]  |
| Bath & NE Somerset   | Headaches<br>[0.96] | Neonatal<br>[1.43] | Anxiety<br>[0.99]    | Back Pain<br>[0.95]  | Depression<br>[1.14] | Conduct<br>[1.0]     | Dermatitis<br>[1.54] | Asthma<br>[1.61]     | Drugs<br>[2.01]      | Acne<br>[1.4]   |
| Bournemouth          | Headaches<br>[0.95] | Anxiety<br>[1.0]   | Depression<br>[1.12] | Back Pain<br>[0.94]  | Conduct<br>[1.0]     | Neonatal<br>[1.06]   | Drugs<br>[2.21]      | Dermatitis<br>[1.54] | Asthma<br>[1.63]     | Acne<br>[1.38]  |
| Bristol              | Headaches<br>[0.95] | Anxiety<br>[0.99]  | Neonatal<br>[1.22]   | Back Pain<br>[0.92]  | Depression<br>[1.12] | Conduct<br>[1.01]    | Asthma<br>[1.68]     | Dermatitis<br>[1.56] | Drugs<br>[2.05]      | Acne<br>[1.28]  |
| Cornwall             | Headaches<br>[0.93] | Anxiety<br>[1.04]  | Depression<br>[1.11] | Back Pain<br>[0.89]  | Neonatal<br>[1.07]   | Conduct<br>[0.98]    | Dermatitis<br>[1.55] | Asthma<br>[1.62]     | Drugs<br>[2.08]      | Acne<br>[1.44]  |
| Devon                | Headaches<br>[0.92] | Anxiety<br>[1.01]  | Back Pain<br>[0.94]  | Depression<br>[1.11] | Conduct<br>[0.99]    | Neonatal<br>[0.98]   | Dermatitis<br>[1.55] | Asthma<br>[1.63]     | Drugs<br>[2.12]      | Acne<br>[1.42]  |
| Dorset               | Headaches<br>[0.92] | Anxiety<br>[1.02]  | Back Pain<br>[0.93]  | Depression<br>[1.09] | Conduct<br>[0.99]    | Neonatal<br>[1.05]   | Dermatitis<br>[1.55] | Asthma<br>[1.64]     | Drugs<br>[2.04]      | Acne<br>[1.43]  |
| Gloucestershire      | Headaches<br>[0.93] | Anxiety<br>[1.01]  | Back Pain<br>[0.93]  | Depression<br>[1.1]  | Conduct<br>[1.0]     | Neonatal<br>[0.99]   | Dermatitis<br>[1.55] | Asthma<br>[1.64]     | Drugs<br>[1.97]      | Acne<br>[1.39]  |
| N Somerset           | Headaches<br>[0.92] | Anxiety<br>[1.02]  | Neonatal<br>[1.17]   | Depression<br>[1.09] | Back Pain<br>[0.92]  | Conduct<br>[0.99]    | Asthma<br>[1.66]     | Dermatitis<br>[1.56] | Drugs<br>[2.25]      | Acne<br>[1.35]  |
| Plymouth             | Headaches<br>[0.93] | Anxiety<br>[1.02]  | Depression<br>[1.11] | Back Pain<br>[0.93]  | Neonatal<br>[1.07]   | Conduct<br>[0.98]    | Drugs<br>[2.32]      | Dermatitis<br>[1.55] | Asthma<br>[1.64]     | Acne<br>[1.38]  |
| Poole                | Headaches<br>[0.92] | Anxiety<br>[1.01]  | Depression<br>[1.09] | Back Pain<br>[0.92]  | Conduct<br>[1.0]     | Neonatal<br>[1.05]   | Dermatitis<br>[1.56] | Asthma<br>[1.62]     | Drugs<br>[1.82]      | Acne<br>[1.37]  |
| Somerset             | Headaches<br>[0.92] | Anxiety<br>[1.03]  | Back Pain<br>[0.95]  | Depression<br>[1.11] | Neonatal<br>[1.13]   | Conduct<br>[0.98]    | Dermatitis<br>[1.55] | Asthma<br>[1.63]     | Drugs<br>[2.04]      | Acne<br>[1.45]  |
| S Gloucestershire    | Headaches<br>[0.93] | Anxiety<br>[0.99]  | Back Pain<br>[0.92]  | Depression<br>[1.09] | Neonatal<br>[1.12]   | Conduct<br>[1.01]    | Dermatitis<br>[1.55] | Asthma<br>[1.65]     | Acne<br>[1.35]       | Drugs<br>[1.82] |
| Swindon              | Headaches<br>[0.92] | Anxiety<br>[1.01]  | Back Pain<br>[0.93]  | Depression<br>[1.08] | Conduct<br>[1.0]     | Asthma<br>[1.67]     | Dermatitis<br>[1.56] | Drugs<br>[1.89]      | Neonatal<br>[0.77]   | Acne<br>[1.32]  |
| Torbay               | Headaches<br>[0.91] | Anxiety<br>[1.05]  | Depression<br>[1.1]  | Back Pain<br>[0.94]  | Conduct<br>[0.97]    | Dermatitis<br>[1.56] | Asthma<br>[1.63]     | Drugs<br>[2.38]      | Neonatal<br>[0.88]   | Acne<br>[1.46]  |
| Wiltshire            | Headaches<br>[0.92] | Anxiety<br>[1.02]  | Neonatal<br>[1.25]   | Back Pain<br>[0.94]  | Depression<br>[1.09] | Conduct<br>[0.99]    | Dermatitis<br>[1.55] | Asthma<br>[1.63]     | Drugs<br>[1.93]      | Acne<br>[1.41]  |
| W Midlands           | Headaches<br>[0.92] | Anxiety<br>[1.02]  | Back Pain<br>[0.93]  | Depression<br>[1.09] | Conduct<br>[0.99]    | Neonatal<br>[1.01]   | Asthma<br>[1.69]     | Dermatitis<br>[1.55] | Drugs<br>[2.02]      | Acne<br>[1.34]  |

**eFigure 7e. Leading ten causes of DALYs with the ratio of observed DALYs to DALYs expected on the basis of Socio-Demographic Index alone in 2017, 10-19 years, both sexes combined.** The top ten causes contributing to DALYs are listed globally, by socio-demographic quintile, and then by GBD superregion, region, country, and subnationally where modeled. For each cell, the ratio of observed DALYs to DALYs expected on the basis of socio-demographic index (SDI) alone are listed. Abbreviations: DALY=disability-adjusted life year, GBD=Global Burden of Disease.

Values shown in brackets represent the ratio of observed DALYs to predicted DALYs on the basis of Socio-Demographic Index (SDI), rounded to two (2) digits. Color ranges (shown below) were calculated to place a roughly equal number of cells into each bin.

| COLOR KEY:            |                     | [0.0-0.73]         | [0.73-0.88]          | [0.88-0.95]          | [0.95-1.01]          | [1.01-1.09]         | [1.09-1.26]          | [1.26-1.55]          | [1.55-2.09]          | 2.09+                |
|-----------------------|---------------------|--------------------|----------------------|----------------------|----------------------|---------------------|----------------------|----------------------|----------------------|----------------------|
|                       | 1                   | 2                  | 3                    | 4                    | 5                    | 6                   | 7                    | 8                    | 9                    | 10                   |
| Birmingham            | Headaches<br>[0.92] | Anxiety<br>[1.01]  | Back Pain<br>[0.94]  | Depression<br>[1.09] | Conduct<br>[0.99]    | Neonatal<br>[0.98]  | Asthma<br>[1.68]     | Dermatitis<br>[1.56] | Drugs<br>[2.0]       | Acne<br>[1.3]        |
| Coventry              | Headaches<br>[0.94] | Anxiety<br>[1.01]  | Back Pain<br>[0.95]  | Depression<br>[1.12] | Conduct<br>[0.99]    | Asthma<br>[1.73]    | Dermatitis<br>[1.55] | Neonatal<br>[0.95]   | Drugs<br>[2.03]      | Acne<br>[1.32]       |
| Dudley                | Headaches<br>[0.91] | Anxiety<br>[1.05]  | Back Pain<br>[0.96]  | Depression<br>[1.09] | Neonatal<br>[1.12]   | Conduct<br>[0.97]   | Asthma<br>[1.71]     | Dermatitis<br>[1.56] | Drugs<br>[2.11]      | Acne<br>[1.38]       |
| Herefordshire         | Headaches<br>[0.93] | Anxiety<br>[1.02]  | Back Pain<br>[0.95]  | Depression<br>[1.1]  | Road Inj<br>[0.5]    | Conduct<br>[0.98]   | Neonatal<br>[1.03]   | Asthma<br>[1.68]     | Dermatitis<br>[1.56] | Drugs<br>[2.15]      |
| Sandwell              | Headaches<br>[0.9]  | Anxiety<br>[1.04]  | Back Pain<br>[0.95]  | Depression<br>[1.08] | Neonatal<br>[1.1]    | Conduct<br>[0.98]   | Asthma<br>[1.77]     | Dermatitis<br>[1.56] | Drugs<br>[1.94]      | Congenital<br>[0.92] |
| Shropshire            | Headaches<br>[0.93] | Anxiety<br>[1.02]  | Back Pain<br>[0.96]  | Depression<br>[1.11] | Conduct<br>[0.98]    | Neonatal<br>[1.0]   | Dermatitis<br>[1.55] | Asthma<br>[1.64]     | Drugs<br>[2.0]       | Acne<br>[1.41]       |
| Solihull              | Headaches<br>[0.92] | Anxiety<br>[1.0]   | Back Pain<br>[0.93]  | Depression<br>[1.09] | Conduct<br>[1.01]    | Asthma<br>[1.7]     | Dermatitis<br>[1.55] | Drugs<br>[1.91]      | Road Inj<br>[0.38]   | Acne<br>[1.33]       |
| Staffordshire         | Headaches<br>[0.92] | Anxiety<br>[1.02]  | Depression<br>[1.1]  | Conduct<br>[0.99]    | Back Pain<br>[0.85]  | Neonatal<br>[0.99]  | Asthma<br>[1.68]     | Dermatitis<br>[1.55] | Drugs<br>[2.09]      | Road Inj<br>[0.37]   |
| Stoke-on-Trent        | Headaches<br>[0.91] | Anxiety<br>[1.04]  | Neonatal<br>[1.21]   | Depression<br>[1.09] | Conduct<br>[0.98]    | Back Pain<br>[0.85] | Asthma<br>[1.71]     | Dermatitis<br>[1.56] | Drugs<br>[2.25]      | Acne<br>[1.34]       |
| Telford & Wrekin      | Headaches<br>[0.93] | Anxiety<br>[1.04]  | Back Pain<br>[0.95]  | Depression<br>[1.1]  | Conduct<br>[0.97]    | Neonatal<br>[1.01]  | Asthma<br>[1.7]      | Dermatitis<br>[1.56] | Drugs<br>[2.14]      | Road Inj<br>[0.35]   |
| Walsall               | Headaches<br>[0.91] | Anxiety<br>[1.05]  | Back Pain<br>[0.97]  | Depression<br>[1.09] | Conduct<br>[0.97]    | Neonatal<br>[1.02]  | Asthma<br>[1.73]     | Dermatitis<br>[1.56] | Drugs<br>[2.17]      | Acne<br>[1.38]       |
| Warwickshire          | Headaches<br>[0.92] | Anxiety<br>[1.0]   | Back Pain<br>[0.93]  | Depression<br>[1.09] | Conduct<br>[1.01]    | Neonatal<br>[1.02]  | Asthma<br>[1.69]     | Dermatitis<br>[1.56] | Drugs<br>[1.91]      | Acne<br>[1.32]       |
| Wolverhampton         | Headaches<br>[0.92] | Anxiety<br>[1.04]  | Back Pain<br>[0.95]  | Depression<br>[1.1]  | Conduct<br>[0.98]    | Asthma<br>[1.69]    | Dermatitis<br>[1.55] | Drugs<br>[1.99]      | Neonatal<br>[0.74]   | Acne<br>[1.35]       |
| Worcestershire        | Headaches<br>[0.92] | Anxiety<br>[1.02]  | Back Pain<br>[0.94]  | Depression<br>[1.1]  | Neonatal<br>[1.14]   | Conduct<br>[0.99]   | Dermatitis<br>[1.55] | Asthma<br>[1.64]     | Drugs<br>[1.96]      | Acne<br>[1.36]       |
| Yorkshire & Humber    | Headaches<br>[0.92] | Anxiety<br>[1.02]  | Back Pain<br>[0.95]  | Depression<br>[1.1]  | Conduct<br>[0.99]    | Asthma<br>[1.72]    | Dermatitis<br>[1.55] | Neonatal<br>[0.95]   | Drugs<br>[2.12]      | Acne<br>[1.36]       |
| Barnsley              | Headaches<br>[0.92] | Anxiety<br>[1.06]  | Back Pain<br>[0.97]  | Depression<br>[1.1]  | Conduct<br>[0.96]    | Asthma<br>[1.81]    | Neonatal<br>[1.01]   | Dermatitis<br>[1.56] | Drugs<br>[2.38]      | Road Inj<br>[0.34]   |
| Bradford              | Headaches<br>[0.91] | Anxiety<br>[1.04]  | Back Pain<br>[0.95]  | Depression<br>[1.08] | Conduct<br>[0.98]    | Neonatal<br>[1.07]  | Asthma<br>[1.68]     | Dermatitis<br>[1.56] | Drugs<br>[1.98]      | Acne<br>[1.35]       |
| Calderdale            | Headaches<br>[0.92] | Anxiety<br>[1.03]  | Back Pain<br>[0.95]  | Depression<br>[1.09] | Conduct<br>[0.98]    | Asthma<br>[1.73]    | Drugs<br>[2.35]      | Dermatitis<br>[1.56] | Neonatal<br>[0.91]   | Road Inj<br>[0.39]   |
| Doncaster             | Headaches<br>[0.92] | Anxiety<br>[1.06]  | Neonatal<br>[1.24]   | Back Pain<br>[0.96]  | Depression<br>[1.09] | Conduct<br>[0.96]   | Asthma<br>[1.74]     | Dermatitis<br>[1.57] | Drugs<br>[2.23]      | Road Inj<br>[0.35]   |
| E Riding of Yorkshire | Headaches<br>[0.93] | Anxiety<br>[1.03]  | Back Pain<br>[0.95]  | Depression<br>[1.11] | Conduct<br>[0.98]    | Asthma<br>[1.73]    | Dermatitis<br>[1.55] | Road Inj<br>[0.43]   | Neonatal<br>[0.94]   | Drugs<br>[2.09]      |
| Kingston upon Hull    | Headaches<br>[0.91] | Anxiety<br>[1.03]  | Back Pain<br>[0.94]  | Depression<br>[1.09] | Conduct<br>[0.98]    | Asthma<br>[1.8]     | Drugs<br>[2.5]       | Dermatitis<br>[1.55] | Neonatal<br>[0.87]   | Acne<br>[1.36]       |
| Kirklees              | Headaches<br>[0.92] | Anxiety<br>[1.04]  | Back Pain<br>[0.95]  | Depression<br>[1.1]  | Conduct<br>[0.98]    | Asthma<br>[1.69]    | Dermatitis<br>[1.56] | Neonatal<br>[0.88]   | Drugs<br>[2.11]      | Acne<br>[1.38]       |
| Leeds                 | Headaches<br>[0.94] | Anxiety<br>[0.99]  | Back Pain<br>[0.94]  | Depression<br>[1.11] | Conduct<br>[1.01]    | Asthma<br>[1.71]    | Dermatitis<br>[1.55] | Drugs<br>[2.01]      | Neonatal<br>[0.84]   | Acne<br>[1.29]       |
| NE Lincolnshire       | Headaches<br>[0.92] | Anxiety<br>[1.04]  | Back Pain<br>[0.94]  | Depression<br>[1.09] | Conduct<br>[0.97]    | Asthma<br>[1.77]    | Dermatitis<br>[1.56] | Drugs<br>[2.29]      | Neonatal<br>[0.91]   | Road Inj<br>[0.35]   |
| N Lincolnshire        | Headaches<br>[0.91] | Anxiety<br>[1.04]  | Back Pain<br>[0.94]  | Depression<br>[1.08] | Conduct<br>[0.98]    | Road Inj<br>[0.48]  | Asthma<br>[1.78]     | Dermatitis<br>[1.56] | Drugs<br>[2.09]      | Neonatal<br>[0.84]   |
| N Yorkshire           | Headaches<br>[0.91] | Anxiety<br>[1.01]  | Back Pain<br>[0.94]  | Depression<br>[1.09] | Conduct<br>[1.0]     | Neonatal<br>[1.08]  | Asthma<br>[1.65]     | Dermatitis<br>[1.55] | Drugs<br>[1.9]       | Acne<br>[1.38]       |
| Rotherham             | Headaches<br>[0.92] | Anxiety<br>[1.05]  | Back Pain<br>[0.97]  | Depression<br>[1.1]  | Conduct<br>[0.97]    | Asthma<br>[1.75]    | Dermatitis<br>[1.56] | Drugs<br>[2.2]       | Neonatal<br>[0.86]   | Road Inj<br>[0.34]   |
| Sheffield             | Headaches<br>[0.95] | Anxiety<br>[1.0]   | Back Pain<br>[0.96]  | Depression<br>[1.12] | Conduct<br>[0.99]    | Neonatal<br>[0.98]  | Asthma<br>[1.69]     | Dermatitis<br>[1.54] | Drugs<br>[2.13]      | Acne<br>[1.35]       |
| Wakefield             | Headaches<br>[0.92] | Anxiety<br>[1.04]  | Back Pain<br>[0.96]  | Depression<br>[1.09] | Conduct<br>[0.97]    | Asthma<br>[1.79]    | Drugs<br>[2.43]      | Dermatitis<br>[1.56] | Road Inj<br>[0.4]    | Neonatal<br>[0.75]   |
| York                  | Headaches<br>[0.96] | Anxiety<br>[0.99]  | Back Pain<br>[0.96]  | Depression<br>[1.14] | Conduct<br>[1.01]    | Asthma<br>[1.71]    | Drugs<br>[2.18]      | Dermatitis<br>[1.54] | Neonatal<br>[0.85]   | Road Inj<br>[0.4]    |
| N Ireland             | Anxiety<br>[1.67]   | Headaches<br>[1.0] | Depression<br>[1.21] | Back Pain<br>[0.98]  | Road Inj<br>[0.43]   | Conduct<br>[0.83]   | Asthma<br>[1.55]     | Neonatal<br>[0.84]   | Dermatitis<br>[1.3]  | Acne<br>[1.36]       |

**eFigure 7e. Leading ten causes of DALYs with the ratio of observed DALYs to DALYs expected on the basis of Socio-Demographic Index alone in 2017, 10-19 years, both sexes combined.** The top ten causes contributing to DALYs are listed globally, by socio-demographic quintile, and then by GBD superregion, region, country, and subnationally where modeled. For each cell, the ratio of observed DALYs to DALYs expected on the basis of socio-demographic index (SDI) alone are listed. Abbreviations: DALY=disability-adjusted life year, GBD=Global Burden of Disease.

Values shown in brackets represent the ratio of observed DALYs to predicted DALYs on the basis of Socio-Demographic Index (SDI), rounded to two (2) digits. Color ranges (shown below) were calculated to place a roughly equal number of cells into each bin.

| COLOR KEY:                  |                       | [0.0-0.73]           | [0.73-0.88]          | [0.88-0.95]          | [0.95-1.01]          | [1.01-1.09]          | [1.09-1.26]          | [1.26-1.55]          | [1.55-2.09]          | 2.09+                |
|-----------------------------|-----------------------|----------------------|----------------------|----------------------|----------------------|----------------------|----------------------|----------------------|----------------------|----------------------|
|                             | 1                     | 2                    | 3                    | 4                    | 5                    | 6                    | 7                    | 8                    | 9                    | 10                   |
| Scotland                    | Headaches<br>[0.98]   | Anxiety<br>[1.12]    | Depression<br>[1.14] | Back Pain<br>[0.92]  | Asthma<br>[1.78]     | Drugs<br>[2.55]      | Conduct<br>[0.91]    | Dermatitis<br>[1.44] | Neonatal<br>[0.81]   | Road Inj<br>[0.35]   |
| Wales                       | Headaches<br>[1.0]    | Anxiety<br>[1.12]    | Depression<br>[1.2]  | Conduct<br>[0.9]     | Back Pain<br>[0.77]  | Asthma<br>[1.51]     | Neonatal<br>[0.83]   | Dermatitis<br>[1.31] | Road Inj<br>[0.36]   | Acne<br>[1.42]       |
| Latin America and Caribbean | Violence<br>[4.99]    | Headaches<br>[1.17]  | Road Inj<br>[0.81]   | Back Pain<br>[1.28]  | Neonatal<br>[1.18]   | Conduct<br>[0.95]    | Anxiety<br>[0.94]    | Depression<br>[0.93] | Self Harm<br>[0.71]  | Congenital<br>[0.75] |
| Andean Latin America        | Headaches<br>[1.12]   | Road Inj<br>[0.67]   | Back Pain<br>[1.08]  | Neonatal<br>[1.12]   | Conduct<br>[0.94]    | Anxiety<br>[0.97]    | Self Harm<br>[0.81]  | Violence<br>[0.96]   | Dermatitis<br>[1.4]  | Depression<br>[0.77] |
| Bolivia                     | Headaches<br>[1.16]   | Road Inj<br>[0.66]   | Back Pain<br>[1.21]  | Iron<br>[1.2]        | Conduct<br>[0.93]    | Neonatal<br>[1.08]   | Anxiety<br>[1.02]    | Violence<br>[0.89]   | Asthma<br>[1.38]     | Dermatitis<br>[1.46] |
| Ecuador                     | Road Inj<br>[1.02]    | Headaches<br>[1.33]  | Self Harm<br>[1.65]  | Violence<br>[1.63]   | Neonatal<br>[1.13]   | Back Pain<br>[1.0]   | Conduct<br>[0.93]    | Anxiety<br>[0.97]    | Depression<br>[0.98] | Epilepsy<br>[1.36]   |
| Peru                        | Headaches<br>[0.99]   | Back Pain<br>[1.08]  | Road Inj<br>[0.47]   | Neonatal<br>[1.13]   | Conduct<br>[0.94]    | Anxiety<br>[0.96]    | Dermatitis<br>[1.48] | LRI<br>[1.35]        | Asthma<br>[1.16]     | Iron<br>[0.9]        |
| Caribbean                   | Road Inj<br>[1.05]    | Headaches<br>[1.15]  | Violence<br>[2.27]   | Disaster<br>[363.5]  | Iron<br>[1.79]       | Anxiety<br>[1.05]    | Conduct<br>[0.86]    | Depression<br>[0.95] | Neonatal<br>[0.95]   | Asthma<br>[1.56]     |
| Antigua                     | Iron<br>[5.53]        | Headaches<br>[1.13]  | Anxiety<br>[0.97]    | Drown<br>[1.71]      | Road Inj<br>[0.45]   | Conduct<br>[0.87]    | Neonatal<br>[0.98]   | Asthma<br>[1.49]     | Depression<br>[0.83] | Violence<br>[1.55]   |
| Bahamas                     | Violence<br>[5.83]    | Headaches<br>[1.13]  | Road Inj<br>[0.72]   | Anxiety<br>[0.94]    | Drown<br>[2.14]      | Conduct<br>[0.89]    | Neonatal<br>[0.97]   | Asthma<br>[1.56]     | Depression<br>[0.82] | Back Pain<br>[0.71]  |
| Barbados                    | Headaches<br>[1.13]   | Violence<br>[3.02]   | Road Inj<br>[0.56]   | Anxiety<br>[0.95]    | Neonatal<br>[1.05]   | Conduct<br>[0.88]    | Depression<br>[0.87] | Back Pain<br>[0.73]  | Drown<br>[1.55]      | Asthma<br>[1.44]     |
| Belize                      | Violence<br>[2.97]    | Headaches<br>[1.16]  | Road Inj<br>[0.8]    | Iron<br>[1.57]       | Anxiety<br>[1.1]     | Drown<br>[0.99]      | Neonatal<br>[1.05]   | Conduct<br>[0.86]    | Asthma<br>[1.61]     | Depression<br>[0.94] |
| Bermuda                     | Headaches<br>[1.13]   | Anxiety<br>[0.89]    | Conduct<br>[0.91]    | Neonatal<br>[0.98]   | Asthma<br>[1.68]     | Depression<br>[0.87] | Road Inj<br>[0.41]   | Back Pain<br>[0.7]   | Acne<br>[1.21]       | Dermatitis<br>[0.98] |
| Cuba                        | Headaches<br>[1.14]   | Anxiety<br>[1.01]    | Conduct<br>[0.87]    | Neonatal<br>[0.96]   | Depression<br>[0.93] | Road Inj<br>[0.38]   | Asthma<br>[1.53]     | Iron<br>[1.37]       | Back Pain<br>[0.64]  | Violence<br>[0.96]   |
| Dominica                    | Road Inj<br>[1.02]    | Headaches<br>[1.13]  | Violence<br>[2.5]    | Drown<br>[1.94]      | Iron<br>[2.3]        | Anxiety<br>[1.0]     | Neonatal<br>[1.11]   | Epilepsy<br>[2.09]   | Asthma<br>[1.75]     | Conduct<br>[0.87]    |
| Dominican Rep               | Road Inj<br>[1.14]    | Headaches<br>[1.17]  | Violence<br>[2.18]   | Anxiety<br>[1.11]    | Neonatal<br>[1.05]   | Conduct<br>[0.86]    | Depression<br>[1.01] | Iron<br>[1.03]       | Back Pain<br>[0.85]  | Asthma<br>[1.21]     |
| Grenada                     | Headaches<br>[1.15]   | Anxiety<br>[1.05]    | Neonatal<br>[1.09]   | Drown<br>[1.09]      | Road Inj<br>[0.42]   | Conduct<br>[0.87]    | Asthma<br>[1.58]     | Depression<br>[0.92] | Back Pain<br>[0.8]   | Congenital<br>[0.74] |
| Guyana                      | Headaches<br>[1.18]   | Self Harm<br>[1.77]  | Road Inj<br>[0.69]   | Violence<br>[1.65]   | Depression<br>[1.41] | Drown<br>[1.03]      | Anxiety<br>[1.12]    | Neonatal<br>[1.11]   | Conduct<br>[0.85]    | Iron<br>[0.99]       |
| Haiti                       | Road Inj<br>[1.51]    | Disaster<br>[299.53] | Iron<br>[1.4]        | Headaches<br>[1.23]  | Violence<br>[1.83]   | HIV<br>[19.49]       | Drown<br>[0.88]      | Anxiety<br>[1.14]    | Asthma<br>[1.51]     | Conduct<br>[0.85]    |
| Jamaica                     | Violence<br>[3.82]    | Headaches<br>[1.14]  | Anxiety<br>[1.01]    | Iron<br>[1.91]       | Neonatal<br>[1.04]   | Road Inj<br>[0.42]   | Conduct<br>[0.86]    | Asthma<br>[1.63]     | Back Pain<br>[0.79]  | Depression<br>[0.86] |
| Puerto Rico                 | Disaster<br>[5205.94] | Violence<br>[7.58]   | Headaches<br>[1.13]  | Asthma<br>[2.03]     | Anxiety<br>[0.89]    | Road Inj<br>[0.49]   | Neonatal<br>[1.05]   | Conduct<br>[0.91]    | Back Pain<br>[0.68]  | Depression<br>[0.77] |
| St Lucia                    | Headaches<br>[1.15]   | Violence<br>[2.43]   | Road Inj<br>[0.56]   | Anxiety<br>[1.04]    | Neonatal<br>[1.11]   | Conduct<br>[0.86]    | Depression<br>[0.94] | Asthma<br>[1.61]     | Drown<br>[1.01]      | Back Pain<br>[0.8]   |
| St Vincent                  | Violence<br>[2.46]    | Headaches<br>[1.16]  | Road Inj<br>[0.53]   | Drown<br>[1.18]      | Anxiety<br>[1.09]    | Neonatal<br>[1.07]   | Conduct<br>[0.86]    | Depression<br>[0.96] | Asthma<br>[1.58]     | Back Pain<br>[0.83]  |
| Suriname                    | Road Inj<br>[0.92]    | Headaches<br>[1.14]  | Self Harm<br>[1.84]  | Depression<br>[1.29] | Anxiety<br>[1.05]    | Violence<br>[1.36]   | Drown<br>[1.11]      | Neonatal<br>[1.04]   | Conduct<br>[0.87]    | Asthma<br>[1.67]     |
| Trinidad Tobago             | Violence<br>[3.93]    | Headaches<br>[1.12]  | Road Inj<br>[0.59]   | Anxiety<br>[0.98]    | Depression<br>[1.05] | Neonatal<br>[1.06]   | Asthma<br>[1.79]     | Conduct<br>[0.88]    | Self Harm<br>[0.86]  | Back Pain<br>[0.75]  |
| Virgin Isl US               | Violence<br>[7.82]    | Headaches<br>[1.12]  | Anxiety<br>[0.89]    | Neonatal<br>[1.01]   | Conduct<br>[0.92]    | Road Inj<br>[0.44]   | Depression<br>[0.87] | Asthma<br>[1.55]     | Back Pain<br>[0.69]  | Disaster<br>[380.64] |
| Central Latin America       | Violence<br>[4.95]    | Headaches<br>[1.0]   | Road Inj<br>[0.71]   | Neonatal<br>[1.41]   | Conduct<br>[0.98]    | Back Pain<br>[0.81]  | Self Harm<br>[0.84]  | Epilepsy<br>[1.37]   | Depression<br>[0.74] | Anxiety<br>[0.69]    |
| Colombia                    | Violence<br>[4.5]     | Headaches<br>[1.05]  | Road Inj<br>[0.58]   | Neonatal<br>[1.39]   | Back Pain<br>[1.11]  | Conduct<br>[0.95]    | Self Harm<br>[0.8]   | Epilepsy<br>[1.33]   | Anxiety<br>[0.6]     | Depression<br>[0.63] |
| Costa Rica                  | Headaches<br>[1.0]    | Neonatal<br>[1.31]   | Road Inj<br>[0.53]   | Conduct<br>[0.95]    | Violence<br>[1.4]    | Back Pain<br>[0.85]  | Depression<br>[0.82] | Anxiety<br>[0.67]    | Asthma<br>[1.25]     | Self Harm<br>[0.68]  |
| El Salvador                 | Violence<br>[8.19]    | Headaches<br>[1.02]  | Road Inj<br>[0.64]   | Neonatal<br>[1.41]   | Self Harm<br>[1.26]  | Conduct<br>[0.94]    | Back Pain<br>[0.92]  | Depression<br>[0.95] | Drown<br>[0.76]      | Anxiety<br>[0.72]    |
| Guatemala                   | Violence<br>[3.72]    | Headaches<br>[1.04]  | Road Inj<br>[0.57]   | Neonatal<br>[1.48]   | Conduct<br>[0.94]    | Back Pain<br>[1.06]  | LRI<br>[1.03]        | Diarrhea<br>[1.51]   | Depression<br>[0.94] | Anxiety<br>[0.73]    |

**eFigure 7e. Leading ten causes of DALYs with the ratio of observed DALYs to DALYs expected on the basis of Socio-Demographic Index alone in 2017, 10-19 years, both sexes combined.** The top ten causes contributing to DALYs are listed globally, by socio-demographic quintile, and then by GBD superregion, region, country, and subnationally where modeled. For each cell, the ratio of observed DALYs to DALYs expected on the basis of socio-demographic index (SDI) alone are listed. Abbreviations: DALY=disability-adjusted life year, GBD=Global Burden of Disease.

Values shown in brackets represent the ratio of observed DALYs to predicted DALYs on the basis of Socio-Demographic Index (SDI), rounded to two (2) digits. Color ranges (shown below) were calculated to place a roughly equal number of cells into each bin.

| COLOR KEY:      |                    | [0.0-0.73]          | [0.73-0.88]         | [0.88-0.95]        | [0.95-1.01]         | [1.01-1.09]         | [1.09-1.26]          | [1.26-1.55]          | [1.55-2.09]          | 2.09+                |
|-----------------|--------------------|---------------------|---------------------|--------------------|---------------------|---------------------|----------------------|----------------------|----------------------|----------------------|
|                 | 1                  | 2                   | 3                   | 4                  | 5                   | 6                   | 7                    | 8                    | 9                    | 10                   |
| Honduras        | Violence<br>[3.63] | Headaches<br>[1.05] | Neonatal<br>[1.62]  | Road Inj<br>[0.48] | Conduct<br>[0.94]   | Back Pain<br>[0.97] | Epilepsy<br>[1.33]   | Diarrhea<br>[1.15]   | Anxiety<br>[0.73]    | Iron<br>[0.58]       |
| Mexico          | Violence<br>[4.49] | Headaches<br>[0.97] | Road Inj<br>[0.71]  | Neonatal<br>[1.42] | Conduct<br>[1.01]   | Self Harm<br>[0.83] | Epilepsy<br>[1.45]   | Anxiety<br>[0.72]    | Congenital<br>[0.84] | Depression<br>[0.73] |
| Aguascalientes  | Violence<br>[3.53] | Road Inj<br>[0.89]  | Headaches<br>[0.97] | Neonatal<br>[1.4]  | Conduct<br>[1.01]   | Self Harm<br>[0.94] | Epilepsy<br>[1.56]   | Congenital<br>[0.93] | Anxiety<br>[0.71]    | Back Pain<br>[0.67]  |
| Baja CA         | Violence<br>[4.61] | Headaches<br>[0.97] | Neonatal<br>[1.4]   | Road Inj<br>[0.54] | Conduct<br>[1.01]   | Anxiety<br>[0.71]   | Back Pain<br>[0.66]  | Epilepsy<br>[1.37]   | Depression<br>[0.67] | Congenital<br>[0.74] |
| Baja CA Sur     | Violence<br>[4.03] | Road Inj<br>[0.76]  | Headaches<br>[0.96] | Neonatal<br>[1.47] | Conduct<br>[1.01]   | Self Harm<br>[0.8]  | Anxiety<br>[0.7]     | Epilepsy<br>[1.43]   | Depression<br>[0.73] | Congenital<br>[0.85] |
| Campeche        | Violence<br>[3.42] | Headaches<br>[0.98] | Neonatal<br>[1.57]  | Road Inj<br>[0.62] | Self Harm<br>[1.29] | Conduct<br>[1.01]   | Depression<br>[0.86] | Anxiety<br>[0.74]    | Epilepsy<br>[1.28]   | Back Pain<br>[0.68]  |
| Chiapas         | Violence<br>[2.85] | Headaches<br>[1.01] | Road Inj<br>[0.56]  | Neonatal<br>[1.48] | Conduct<br>[1.01]   | Epilepsy<br>[1.43]  | Self Harm<br>[0.86]  | Leukemia<br>[1.44]   | Anxiety<br>[0.77]    | Back Pain<br>[0.72]  |
| Chihuahua       | Violence<br>[6.6]  | Road Inj<br>[0.84]  | Headaches<br>[0.97] | Neonatal<br>[1.3]  | Conduct<br>[1.01]   | Self Harm<br>[1.07] | Epilepsy<br>[1.48]   | Congenital<br>[0.91] | Anxiety<br>[0.72]    | Depression<br>[0.76] |
| Coahuila        | Violence<br>[4.09] | Headaches<br>[0.97] | Road Inj<br>[0.55]  | Neonatal<br>[1.19] | Conduct<br>[1.01]   | Anxiety<br>[0.71]   | Epilepsy<br>[1.4]    | Back Pain<br>[0.68]  | Self Harm<br>[0.72]  | Depression<br>[0.72] |
| Colima          | Violence<br>[4.83] | Road Inj<br>[0.75]  | Headaches<br>[0.97] | Neonatal<br>[1.5]  | Conduct<br>[1.01]   | Epilepsy<br>[1.47]  | Anxiety<br>[0.71]    | Back Pain<br>[0.66]  | Depression<br>[0.71] | Congenital<br>[0.79] |
| Mexico City     | Violence<br>[7.49] | Headaches<br>[0.96] | Neonatal<br>[1.48]  | Road Inj<br>[0.52] | Conduct<br>[0.98]   | Self Harm<br>[1.0]  | Epilepsy<br>[1.8]    | Congenital<br>[0.96] | Depression<br>[0.74] | Back Pain<br>[0.64]  |
| Durango         | Violence<br>[4.59] | Road Inj<br>[0.87]  | Headaches<br>[0.98] | Neonatal<br>[1.26] | Conduct<br>[1.01]   | Anxiety<br>[0.73]   | Epilepsy<br>[1.35]   | Back Pain<br>[0.69]  | Depression<br>[0.72] | Self Harm<br>[0.69]  |
| Guanajuato      | Violence<br>[3.83] | Road Inj<br>[0.91]  | Headaches<br>[0.98] | Neonatal<br>[1.29] | Conduct<br>[1.01]   | Self Harm<br>[1.11] | Epilepsy<br>[1.41]   | Anxiety<br>[0.74]    | Depression<br>[0.77] | Back Pain<br>[0.69]  |
| Guerrero        | Violence<br>[7.57] | Road Inj<br>[0.73]  | Headaches<br>[1.0]  | Neonatal<br>[1.53] | Conduct<br>[1.01]   | Epilepsy<br>[1.23]  | Anxiety<br>[0.77]    | Congenital<br>[0.83] | Back Pain<br>[0.71]  | Depression<br>[0.71] |
| Hidalgo         | Violence<br>[3.28] | Road Inj<br>[0.84]  | Headaches<br>[0.99] | Neonatal<br>[1.78] | Conduct<br>[1.01]   | Epilepsy<br>[1.44]  | Anxiety<br>[0.76]    | Self Harm<br>[0.74]  | Back Pain<br>[0.7]   | Congenital<br>[0.8]  |
| Jalisco         | Violence<br>[4.67] | Road Inj<br>[0.9]   | Headaches<br>[0.97] | Neonatal<br>[1.35] | Conduct<br>[1.01]   | Self Harm<br>[1.06] | Epilepsy<br>[1.64]   | Anxiety<br>[0.71]    | Congenital<br>[0.91] | Depression<br>[0.76] |
| Mexico          | Violence<br>[4.72] | Headaches<br>[0.93] | Neonatal<br>[1.7]   | Road Inj<br>[0.57] | Conduct<br>[1.01]   | Anxiety<br>[0.72]   | Epilepsy<br>[1.4]    | Self Harm<br>[0.76]  | Congenital<br>[0.82] | Depression<br>[0.71] |
| Michoacan       | Violence<br>[4.45] | Road Inj<br>[0.97]  | Headaches<br>[1.0]  | Neonatal<br>[1.23] | Conduct<br>[1.01]   | Self Harm<br>[0.87] | Epilepsy<br>[1.28]   | Anxiety<br>[0.76]    | Congenital<br>[0.86] | Back Pain<br>[0.71]  |
| Morelos         | Violence<br>[5.65] | Headaches<br>[0.98] | Road Inj<br>[0.6]   | Neonatal<br>[1.39] | Conduct<br>[1.01]   | Epilepsy<br>[1.5]   | Congenital<br>[0.94] | Anxiety<br>[0.72]    | Self Harm<br>[0.7]   | Depression<br>[0.7]  |
| Nayarit         | Violence<br>[4.13] | Road Inj<br>[0.9]   | Headaches<br>[0.98] | Neonatal<br>[1.52] | Conduct<br>[1.01]   | Anxiety<br>[0.73]   | Epilepsy<br>[1.35]   | Back Pain<br>[0.68]  | Depression<br>[0.7]  | Congenital<br>[0.79] |
| Nuevo Leon      | Violence<br>[4.91] | Headaches<br>[0.96] | Road Inj<br>[0.49]  | Conduct<br>[1.02]  | Neonatal<br>[1.14]  | Anxiety<br>[0.69]   | Self Harm<br>[0.73]  | Epilepsy<br>[1.45]   | Back Pain<br>[0.66]  | Depression<br>[0.71] |
| Oaxaca          | Violence<br>[3.9]  | Headaches<br>[1.01] | Road Inj<br>[0.62]  | Neonatal<br>[1.45] | Conduct<br>[1.01]   | Epilepsy<br>[1.45]  | Congenital<br>[0.89] | Anxiety<br>[0.77]    | Back Pain<br>[0.71]  | Depression<br>[0.7]  |
| Puebla          | Violence<br>[3.39] | Road Inj<br>[0.83]  | Headaches<br>[1.0]  | Neonatal<br>[1.35] | Conduct<br>[1.01]   | Self Harm<br>[0.87] | Congenital<br>[0.91] | Anxiety<br>[0.76]    | Back Pain<br>[0.71]  | Epilepsy<br>[1.19]   |
| Queretaro       | Violence<br>[3.49] | Road Inj<br>[0.74]  | Headaches<br>[0.97] | Neonatal<br>[1.49] | Conduct<br>[1.01]   | Epilepsy<br>[1.44]  | Anxiety<br>[0.72]    | Back Pain<br>[0.67]  | Depression<br>[0.73] | Congenital<br>[0.81] |
| Quintana Roo    | Violence<br>[3.86] | Neonatal<br>[1.81]  | Headaches<br>[0.98] | Road Inj<br>[0.6]  | Self Harm<br>[1.17] | Conduct<br>[1.01]   | Depression<br>[0.84] | Anxiety<br>[0.73]    | Epilepsy<br>[1.35]   | Back Pain<br>[0.66]  |
| San Luis Potosi | Violence<br>[4.02] | Road Inj<br>[0.88]  | Headaches<br>[0.98] | Neonatal<br>[1.23] | Conduct<br>[1.01]   | Self Harm<br>[1.13] | Epilepsy<br>[1.55]   | Congenital<br>[0.95] | Anxiety<br>[0.74]    | Depression<br>[0.74] |
| Sinaloa         | Violence<br>[5.82] | Road Inj<br>[0.85]  | Headaches<br>[0.97] | Neonatal<br>[1.28] | Conduct<br>[1.01]   | Anxiety<br>[0.71]   | Epilepsy<br>[1.37]   | Back Pain<br>[0.66]  | Depression<br>[0.68] | Congenital<br>[0.7]  |
| Sonora          | Violence<br>[4.36] | Road Inj<br>[0.74]  | Headaches<br>[0.97] | Neonatal<br>[1.24] | Conduct<br>[1.01]   | Epilepsy<br>[1.47]  | Anxiety<br>[0.71]    | Self Harm<br>[0.76]  | Back Pain<br>[0.67]  | Depression<br>[0.72] |
| Tabasco         | Violence<br>[3.72] | Road Inj<br>[1.14]  | Headaches<br>[0.98] | Neonatal<br>[1.55] | Self Harm<br>[1.4]  | Conduct<br>[1.01]   | Drown<br>[0.98]      | Congenital<br>[0.96] | Epilepsy<br>[1.42]   | Depression<br>[0.81] |
| Tamaulipas      | Violence<br>[4.89] | Headaches<br>[0.97] | Neonatal<br>[1.59]  | Road Inj<br>[0.55] | Conduct<br>[1.01]   | Anxiety<br>[0.71]   | Back Pain<br>[0.67]  | Epilepsy<br>[1.32]   | Depression<br>[0.68] | Congenital<br>[0.72] |
| Tlaxcala        | Violence<br>[3.15] | Road Inj<br>[0.8]   | Headaches<br>[0.99] | Neonatal<br>[1.53] | Conduct<br>[1.01]   | Epilepsy<br>[1.49]  | Anxiety<br>[0.75]    | Congenital<br>[0.87] | Back Pain<br>[0.7]   | CKD<br>[2.75]        |

**eFigure 7e. Leading ten causes of DALYs with the ratio of observed DALYs to DALYs expected on the basis of Socio-Demographic Index alone in 2017, 10-19 years, both sexes combined.** The top ten causes contributing to DALYs are listed globally, by socio-demographic quintile, and then by GBD superregion, region, country, and subnationally where modeled. For each cell, the ratio of observed DALYs to DALYs expected on the basis of socio-demographic index (SDI) alone are listed. Abbreviations: DALY=disability-adjusted life year, GBD=Global Burden of Disease.

Values shown in brackets represent the ratio of observed DALYs to predicted DALYs on the basis of Socio-Demographic Index (SDI), rounded to two (2) digits. Color ranges (shown below) were calculated to place a roughly equal number of cells into each bin.

| COLOR KEY:                    |                     | [0.0-0.73]          | [0.73-0.88]         | [0.88-0.95]         | [0.95-1.01]          | [1.01-1.09]          | [1.09-1.26]          | [1.26-1.55]          | [1.55-2.09]          | 2.09+                |
|-------------------------------|---------------------|---------------------|---------------------|---------------------|----------------------|----------------------|----------------------|----------------------|----------------------|----------------------|
|                               | 1                   | 2                   | 3                   | 4                   | 5                    | 6                    | 7                    | 8                    | 9                    | 10                   |
| Veracruz                      | Violence<br>[3.82]  | Headaches<br>[0.99] | Neonatal<br>[1.53]  | Road Inj<br>[0.55]  | Conduct<br>[1.01]    | Epilepsy<br>[1.46]   | Congenital<br>[0.9]  | Anxiety<br>[0.76]    | Depression<br>[0.75] | Self Harm<br>[0.72]  |
| Yucatan                       | Violence<br>[3.13]  | Headaches<br>[0.98] | Neonatal<br>[1.32]  | Road Inj<br>[0.51]  | Conduct<br>[1.01]    | Self Harm<br>[1.06]  | Depression<br>[0.82] | Epilepsy<br>[1.42]   | Anxiety<br>[0.73]    | Congenital<br>[0.85] |
| Zacatecas                     | Violence<br>[4.16]  | Road Inj<br>[1.23]  | Headaches<br>[0.98] | Conduct<br>[1.01]   | Neonatal<br>[0.98]   | Epilepsy<br>[1.48]   | Anxiety<br>[0.74]    | Back Pain<br>[0.7]   | Self Harm<br>[0.69]  | Depression<br>[0.69] |
| Nicaragua                     | Headaches<br>[1.04] | Neonatal<br>[1.51]  | Conduct<br>[0.95]   | Back Pain<br>[0.95] | Road Inj<br>[0.37]   | Self Harm<br>[0.85]  | Depression<br>[0.88] | Violence<br>[0.73]   | Anxiety<br>[0.73]    | Epilepsy<br>[0.95]   |
| Panama                        | Violence<br>[3.94]  | Headaches<br>[0.99] | Neonatal<br>[1.28]  | Road Inj<br>[0.51]  | Conduct<br>[0.96]    | Back Pain<br>[0.82]  | Dermatitis<br>[1.31] | Depression<br>[0.74] | Anxiety<br>[0.65]    | Asthma<br>[1.19]     |
| Venezuela                     | Violence<br>[10.66] | Road Inj<br>[1.22]  | Headaches<br>[0.98] | Neonatal<br>[1.4]   | Self Harm<br>[1.13]  | Conduct<br>[0.96]    | Back Pain<br>[0.75]  | Depression<br>[0.79] | Congenital<br>[0.9]  | Mech<br>[2.34]       |
| <b>Tropical Latin America</b> | Violence<br>[7.16]  | Headaches<br>[1.43] | Road Inj<br>[0.95]  | Back Pain<br>[2.06] | Anxiety<br>[1.22]    | Depression<br>[1.23] | Conduct<br>[0.94]    | Iron<br>[1.63]       | Neonatal<br>[0.93]   | Bipolar<br>[1.73]    |
| Brazil                        | Violence<br>[7.54]  | Headaches<br>[1.43] | Back Pain<br>[2.08] | Road Inj<br>[0.95]  | Anxiety<br>[1.21]    | Depression<br>[1.23] | Conduct<br>[0.94]    | Iron<br>[1.69]       | Neonatal<br>[0.94]   | Bipolar<br>[1.72]    |
| Acre                          | Violence<br>[5.94]  | Headaches<br>[1.45] | Back Pain<br>[2.2]  | Road Inj<br>[0.86]  | Iron<br>[1.75]       | Anxiety<br>[1.29]    | Depression<br>[1.23] | Conduct<br>[0.95]    | Drown<br>[0.99]      | Neonatal<br>[1.01]   |
| Alagoas                       | Violence<br>[11.74] | Headaches<br>[1.49] | Road Inj<br>[0.96]  | Back Pain<br>[2.22] | Iron<br>[1.33]       | Depression<br>[1.4]  | Anxiety<br>[1.33]    | Conduct<br>[0.95]    | Neonatal<br>[0.86]   | Drown<br>[0.63]      |
| Amapa                         | Violence<br>[11.13] | Headaches<br>[1.43] | Back Pain<br>[2.01] | Road Inj<br>[0.71]  | Drown<br>[1.59]      | Anxiety<br>[1.22]    | Iron<br>[2.0]        | Depression<br>[1.23] | Conduct<br>[0.95]    | Neonatal<br>[0.99]   |
| Amazonas                      | Violence<br>[6.78]  | Headaches<br>[1.44] | Back Pain<br>[2.12] | Road Inj<br>[0.57]  | Anxiety<br>[1.25]    | Iron<br>[1.74]       | Depression<br>[1.13] | Conduct<br>[0.95]    | Drown<br>[0.94]      | Self Harm<br>[0.88]  |
| Bahia                         | Violence<br>[5.06]  | Headaches<br>[1.46] | Back Pain<br>[2.18] | Iron<br>[1.63]      | Road Inj<br>[0.56]   | Anxiety<br>[1.31]    | Depression<br>[1.11] | Conduct<br>[0.86]    | Neonatal<br>[0.93]   | Bipolar<br>[1.8]     |
| Ceara                         | Violence<br>[8.72]  | Road Inj<br>[1.11]  | Headaches<br>[1.46] | Back Pain<br>[2.17] | Iron<br>[1.63]       | Anxiety<br>[1.3]     | Depression<br>[1.3]  | Conduct<br>[0.94]    | Neonatal<br>[0.88]   | Self Harm<br>[0.7]   |
| Distrito Federal              | Violence<br>[16.95] | Headaches<br>[1.42] | Back Pain<br>[1.9]  | Road Inj<br>[0.81]  | Anxiety<br>[1.07]    | Depression<br>[1.17] | Conduct<br>[0.99]    | Neonatal<br>[1.02]   | Asthma<br>[1.23]     | Congenital<br>[0.94] |
| Espirito Santo                | Violence<br>[12.72] | Headaches<br>[1.43] | Road Inj<br>[0.99]  | Back Pain<br>[2.0]  | Iron<br>[2.54]       | Anxiety<br>[1.2]     | Depression<br>[1.26] | Conduct<br>[0.95]    | Neonatal<br>[0.91]   | Asthma<br>[1.38]     |
| Goiás                         | Violence<br>[10.61] | Road Inj<br>[1.22]  | Headaches<br>[1.44] | Back Pain<br>[2.11] | Anxiety<br>[1.24]    | Depression<br>[1.28] | Conduct<br>[0.95]    | Iron<br>[1.35]       | Neonatal<br>[0.85]   | Asthma<br>[1.19]     |
| Maranhao                      | Headaches<br>[1.5]  | Back Pain<br>[2.25] | Iron<br>[1.55]      | Violence<br>[1.87]  | Road Inj<br>[0.61]   | Anxiety<br>[1.33]    | Depression<br>[1.19] | Conduct<br>[0.95]    | Neonatal<br>[0.97]   | Bipolar<br>[1.85]    |
| Mato Grosso                   | Violence<br>[7.11]  | Road Inj<br>[1.45]  | Headaches<br>[1.43] | Back Pain<br>[2.08] | Anxiety<br>[1.22]    | Depression<br>[1.18] | Conduct<br>[0.95]    | Iron<br>[1.38]       | Neonatal<br>[0.89]   | Drown<br>[0.98]      |
| Mato Grosso do Sul            | Violence<br>[5.04]  | Road Inj<br>[1.1]   | Headaches<br>[1.44] | Back Pain<br>[2.12] | Anxiety<br>[1.23]    | Depression<br>[1.32] | Conduct<br>[0.95]    | Self Harm<br>[1.06]  | Neonatal<br>[1.03]   | Iron<br>[1.26]       |
| Minas Gerais                  | Violence<br>[6.65]  | Headaches<br>[1.42] | Road Inj<br>[0.97]  | Back Pain<br>[2.1]  | Anxiety<br>[1.23]    | Depression<br>[1.21] | Conduct<br>[0.95]    | Neonatal<br>[0.99]   | Iron<br>[1.46]       | Drown<br>[0.84]      |
| Para                          | Violence<br>[5.13]  | Headaches<br>[1.47] | Back Pain<br>[2.17] | Road Inj<br>[0.69]  | Anxiety<br>[1.32]    | Conduct<br>[0.95]    | Depression<br>[1.04] | Iron<br>[1.03]       | Neonatal<br>[0.9]    | Bipolar<br>[1.8]     |
| Paraiba                       | Violence<br>[7.51]  | Headaches<br>[1.47] | Road Inj<br>[1.07]  | Back Pain<br>[2.2]  | Anxiety<br>[1.32]    | Iron<br>[1.34]       | Depression<br>[1.24] | Conduct<br>[0.95]    | Neonatal<br>[0.83]   | Congenital<br>[0.78] |
| Parana                        | Violence<br>[7.76]  | Road Inj<br>[1.33]  | Headaches<br>[1.43] | Back Pain<br>[2.08] | Anxiety<br>[1.2]     | Depression<br>[1.24] | Conduct<br>[0.95]    | Neonatal<br>[0.96]   | Iron<br>[1.63]       | Asthma<br>[1.24]     |
| Pernambuco                    | Violence<br>[9.87]  | Headaches<br>[1.46] | Road Inj<br>[1.0]   | Back Pain<br>[2.17] | Depression<br>[1.41] | Iron<br>[1.54]       | Anxiety<br>[1.31]    | Conduct<br>[0.95]    | Neonatal<br>[0.87]   | Congenital<br>[0.81] |
| Piaui                         | Road Inj<br>[1.39]  | Violence<br>[3.36]  | Headaches<br>[1.49] | Back Pain<br>[2.26] | Anxiety<br>[1.34]    | Depression<br>[1.17] | Conduct<br>[0.95]    | Neonatal<br>[1.0]    | Drown<br>[0.7]       | Self Harm<br>[0.78]  |
| Rio de Janeiro                | Violence<br>[15.09] | Road Inj<br>[1.15]  | Headaches<br>[1.43] | Back Pain<br>[1.77] | Anxiety<br>[1.16]    | Depression<br>[1.14] | Neonatal<br>[1.15]   | Conduct<br>[0.96]    | Iron<br>[1.47]       | Congenital<br>[0.84] |
| Rio Grande do Norte           | Violence<br>[11.99] | Headaches<br>[1.46] | Road Inj<br>[1.03]  | Back Pain<br>[2.16] | Anxiety<br>[1.3]     | Iron<br>[1.58]       | Depression<br>[1.28] | Conduct<br>[0.95]    | Self Harm<br>[0.82]  | Neonatal<br>[0.8]    |
| Rio Grande do Sul             | Violence<br>[8.11]  | Back Pain<br>[2.7]  | Headaches<br>[1.43] | Road Inj<br>[0.96]  | Anxiety<br>[1.17]    | Depression<br>[1.29] | Conduct<br>[0.88]    | Congenital<br>[1.2]  | Neonatal<br>[0.96]   | Self Harm<br>[0.86]  |
| Rondonia                      | Violence<br>[5.84]  | Road Inj<br>[1.38]  | Headaches<br>[1.45] | Back Pain<br>[2.16] | Anxiety<br>[1.27]    | Depression<br>[1.25] | Conduct<br>[0.95]    | Drown<br>[1.04]      | Neonatal<br>[1.05]   | Congenital<br>[1.13] |
| Roraima                       | Violence<br>[5.38]  | Road Inj<br>[1.36]  | Headaches<br>[1.43] | Back Pain<br>[2.08] | Iron<br>[2.08]       | Depression<br>[1.41] | Anxiety<br>[1.23]    | Drown<br>[1.33]      | Conduct<br>[0.95]    | Self Harm<br>[1.05]  |

**eFigure 7e. Leading ten causes of DALYs with the ratio of observed DALYs to DALYs expected on the basis of Socio-Demographic Index alone in 2017, 10-19 years, both sexes combined.** The top ten causes contributing to DALYs are listed globally, by socio-demographic quintile, and then by GBD superregion, region, country, and subnationally where modeled. For each cell, the ratio of observed DALYs to DALYs expected on the basis of socio-demographic index (SDI) alone are listed. Abbreviations: DALY=disability-adjusted life year, GBD=Global Burden of Disease.

Values shown in brackets represent the ratio of observed DALYs to predicted DALYs on the basis of Socio-Demographic Index (SDI), rounded to two (2) digits. Color ranges (shown below) were calculated to place a roughly equal number of cells into each bin.

| COLOR KEY:                   |                                  | [0.0-0.73]           | [0.73-0.88]                   | [0.88-0.95]          | [0.95-1.01]          | [1.01-1.09]          | [1.09-1.26]                     | [1.26-1.55]          | [1.55-2.09]                    | 2.09+                |
|------------------------------|----------------------------------|----------------------|-------------------------------|----------------------|----------------------|----------------------|---------------------------------|----------------------|--------------------------------|----------------------|
|                              | 1                                | 2                    | 3                             | 4                    | 5                    | 6                    | 7                               | 8                    | 9                              | 10                   |
| Santa Catarina               | Road Inj<br>[1.39]               | Headaches<br>[1.7]   | Violence<br>[3.87]            | Back Pain<br>[2.0]   | Depression<br>[1.37] | Anxiety<br>[1.17]    | Conduct<br>[0.96]               | Iron<br>[1.74]       | Neonatal<br>[0.87]             | Asthma<br>[1.36]     |
| Sao Paulo                    | Headaches<br>[1.36]              | Violence<br>[4.7]    | Back Pain<br>[2.0]            | Road Inj<br>[0.79]   | Depression<br>[1.3]  | Anxiety<br>[1.13]    | Conduct<br>[0.97]               | Neonatal<br>[0.97]   | Iron<br>[1.8]                  | Bipolar<br>[1.71]    |
| Sergipe                      | Violence<br>[11.37]              | Road Inj<br>[1.31]   | Headaches<br>[1.45]           | Back Pain<br>[2.12]  | Iron<br>[1.86]       | Anxiety<br>[1.28]    | Depression<br>[1.23]            | Conduct<br>[0.95]    | Drown<br>[0.97]                | Neonatal<br>[1.03]   |
| Tocantins                    | Violence<br>[5.29]               | Road Inj<br>[1.47]   | Headaches<br>[1.45]           | Back Pain<br>[2.17]  | Anxiety<br>[1.28]    | Iron<br>[1.58]       | Depression<br>[1.3]             | Conduct<br>[0.95]    | Neonatal<br>[1.01]             | Drown<br>[0.8]       |
| Paraguay                     | Road Inj<br>[1.1]                | Headaches<br>[1.44]  | Back Pain<br>[1.41]           | Violence<br>[1.69]   | Anxiety<br>[1.3]     | Depression<br>[1.06] | Conduct<br>[0.9]                | Self Harm<br>[0.99]  | Iron<br>[1.09]                 | Asthma<br>[1.43]     |
| North Africa and Middle East | Conflict<br>Terror<br>[1294.15]  | Road Inj<br>[1.04]   | Headaches<br>[1.02]           | Back Pain<br>[1.24]  | Anxiety<br>[1.15]    | Depression<br>[1.17] | Conduct<br>[0.94]               | Iron<br>[1.42]       | Neonatal<br>[0.96]             | Congenital<br>[1.0]  |
| Afghanistan                  | Road Inj<br>[1.03]               | Headaches<br>[1.19]  | Conflict<br>Terror<br>[22.45] | Back Pain<br>[1.56]  | Anxiety<br>[1.31]    | Violence<br>[0.93]   | Depression<br>[1.17]            | Meningitis<br>[0.6]  | Conduct<br>[0.95]              | LRI<br>[0.56]        |
| Algeria                      | Road Inj<br>[0.9]                | Headaches<br>[0.99]  | Back Pain<br>[1.13]           | Anxiety<br>[1.1]     | Depression<br>[1.11] | Conduct<br>[0.95]    | Neonatal<br>[1.07]              | Congenital<br>[1.05] | Asthma<br>[0.88]               | Dermatitis<br>[0.87] |
| Bahrain                      | Headaches<br>[0.98]              | Back Pain<br>[1.11]  | Anxiety<br>[1.08]             | Depression<br>[1.18] | Road Inj<br>[0.5]    | Conduct<br>[0.95]    | Neonatal<br>[1.05]              | Dermatitis<br>[1.01] | Hemog<br>[3.94]                | Iron<br>[1.06]       |
| Egypt                        | Road Inj<br>[1.25]               | Headaches<br>[1.08]  | Back Pain<br>[1.4]            | Iron<br>[1.39]       | Anxiety<br>[1.08]    | Congenital<br>[1.24] | Conduct<br>[0.94]               | LRI<br>[1.59]        | Neonatal<br>[1.04]             | Depression<br>[1.0]  |
| Iran                         | Road Inj<br>[1.52]               | Headaches<br>[1.38]  | Anxiety<br>[1.45]             | Depression<br>[1.42] | Back Pain<br>[1.09]  | Neonatal<br>[1.21]   | Conduct<br>[1.02]               | Congenital<br>[1.12] | Self Harm<br>[0.72]            | Drugs<br>[1.76]      |
| Iraq                         | Conflict<br>Terror<br>[3082.11]  | Headaches<br>[1.01]  | Back Pain<br>[1.24]           | Anxiety<br>[1.16]    | Neonatal<br>[1.11]   | Conduct<br>[0.92]    | Road Inj<br>[0.43]              | Depression<br>[1.06] | Congenital<br>[1.0]            | Violence<br>[0.88]   |
| Jordan                       | Headaches<br>[0.97]              | Neonatal<br>[1.38]   | Back Pain<br>[1.13]           | Anxiety<br>[1.09]    | Road Inj<br>[0.51]   | Depression<br>[1.1]  | Conduct<br>[0.96]               | Iron<br>[1.55]       | Congenital<br>[0.97]           | Asthma<br>[0.98]     |
| Kuwait                       | Road Inj<br>[0.84]               | Headaches<br>[0.81]  | Back Pain<br>[1.05]           | Anxiety<br>[0.99]    | Neonatal<br>[1.15]   | Depression<br>[1.06] | Conduct<br>[0.99]               | Congenital<br>[0.95] | Dermatitis<br>[0.88]           | Asthma<br>[0.9]      |
| Lebanon                      | Headaches<br>[0.98]              | Anxiety<br>[1.28]    | Depression<br>[1.05]          | Neonatal<br>[1.04]   | Conduct<br>[0.92]    | Back Pain<br>[0.84]  | Road Inj<br>[0.38]              | Congenital<br>[0.88] | Conflict<br>Terror<br>[469.59] | Dermatitis<br>[1.05] |
| Libya                        | Conflict<br>Terror<br>[3299.91]  | Road Inj<br>[1.13]   | Headaches<br>[0.98]           | Back Pain<br>[1.1]   | Anxiety<br>[1.02]    | Depression<br>[1.11] | Conduct<br>[0.97]               | Neonatal<br>[1.01]   | Congenital<br>[1.25]           | Oth Trans<br>[6.46]  |
| Morocco                      | Road Inj<br>[1.04]               | Headaches<br>[1.02]  | Depression<br>[1.72]          | Back Pain<br>[1.46]  | Anxiety<br>[1.24]    | Conduct<br>[0.94]    | Neonatal<br>[1.06]              | Congenital<br>[1.06] | Iron<br>[0.84]                 | Self Harm<br>[0.67]  |
| Palestine                    | Headaches<br>[1.03]              | Depression<br>[1.66] | Back Pain<br>[1.27]           | Anxiety<br>[1.25]    | Conduct<br>[0.94]    | Neonatal<br>[1.16]   | Conflict<br>Terror<br>[194.05]  | Road Inj<br>[0.36]   | Iron<br>[0.65]                 | Violence<br>[0.71]   |
| Oman                         | Road Inj<br>[1.66]               | Headaches<br>[0.97]  | Back Pain<br>[1.08]           | Anxiety<br>[1.04]    | Depression<br>[1.09] | Conduct<br>[0.97]    | Neonatal<br>[1.07]              | Congenital<br>[0.73] | Dermatitis<br>[0.77]           | Iron<br>[1.24]       |
| Qatar                        | Road Inj<br>[1.23]               | Headaches<br>[0.95]  | Back Pain<br>[1.12]           | Anxiety<br>[1.0]     | Depression<br>[1.07] | Conduct<br>[1.0]     | Neonatal<br>[0.95]              | Congenital<br>[0.95] | Self Harm<br>[0.61]            | Dermatitis<br>[0.98] |
| Saudi Arabia                 | Road Inj<br>[1.16]               | Headaches<br>[1.03]  | Back Pain<br>[1.11]           | Anxiety<br>[1.01]    | Depression<br>[1.11] | Conduct<br>[0.98]    | Conflict<br>Terror<br>[1053.22] | Congenital<br>[1.06] | Neonatal<br>[0.72]             | Dermatitis<br>[0.97] |
| Sudan                        | Road Inj<br>[1.14]               | Iron<br>[1.32]       | Headaches<br>[1.04]           | Back Pain<br>[1.39]  | Anxiety<br>[1.25]    | Depression<br>[1.13] | Conduct<br>[0.94]               | Congenital<br>[0.9]  | Malaria<br>[19.83]             | Diarrhea<br>[0.83]   |
| Syria                        | Conflict<br>Terror<br>[11074.46] | Headaches<br>[0.98]  | Back Pain<br>[1.2]            | Anxiety<br>[1.18]    | Road Inj<br>[0.48]   | Depression<br>[1.11] | Conduct<br>[0.94]               | Iron<br>[1.06]       | Neonatal<br>[0.9]              | Congenital<br>[0.79] |
| Tunisia                      | Road Inj<br>[0.94]               | Headaches<br>[0.99]  | Anxiety<br>[1.13]             | Depression<br>[1.15] | Back Pain<br>[1.04]  | Conduct<br>[0.95]    | Neonatal<br>[1.04]              | Dermatitis<br>[1.03] | Congenital<br>[0.69]           | Mech<br>[1.68]       |
| Turkey                       | Headaches<br>[0.8]               | Road Inj<br>[0.63]   | Back Pain<br>[1.26]           | Depression<br>[1.11] | Conduct<br>[0.94]    | Anxiety<br>[0.83]    | Neonatal<br>[0.74]              | Congenital<br>[0.78] | Conflict<br>Terror<br>[399.16] | Epilepsy<br>[1.11]   |
| UAE                          | Road Inj<br>[1.98]               | Headaches<br>[0.97]  | Back Pain<br>[1.02]           | Anxiety<br>[0.96]    | Conduct<br>[0.96]    | Neonatal<br>[1.01]   | Congenital<br>[1.33]            | Depression<br>[0.85] | Drugs<br>[1.84]                | Asthma<br>[1.13]     |

**eFigure 7e. Leading ten causes of DALYs with the ratio of observed DALYs to DALYs expected on the basis of Socio-Demographic Index alone in 2017, 10-19 years, both sexes combined.** The top ten causes contributing to DALYs are listed globally, by socio-demographic quintile, and then by GBD superregion, region, country, and subnationally where modeled. For each cell, the ratio of observed DALYs to DALYs expected on the basis of socio-demographic index (SDI) alone are listed. Abbreviations: DALY=disability-adjusted life year, GBD=Global Burden of Disease.

Values shown in brackets represent the ratio of observed DALYs to predicted DALYs on the basis of Socio-Demographic Index (SDI), rounded to two (2) digits. Color ranges (shown below) were calculated to place a roughly equal number of cells into each bin.

| COLOR KEY:        |                             | [0.0-0.73]                  | [0.73-0.88]                 | [0.88-0.95]                  | [0.95-1.01]                | [1.01-1.09]                 | [1.09-1.26]          | [1.26-1.55]                | [1.55-2.09]          | 2.09+                |
|-------------------|-----------------------------|-----------------------------|-----------------------------|------------------------------|----------------------------|-----------------------------|----------------------|----------------------------|----------------------|----------------------|
|                   | 1                           | 2                           | 3                           | 4                            | 5                          | 6                           | 7                    | 8                          | 9                    | 10                   |
| Yemen             | Conflict Terror<br>[614.02] | Iron<br>[2.95]              | Road Inj<br>[1.33]          | Headaches<br>[1.05]          | Back Pain<br>[1.3]         | Anxiety<br>[1.24]           | Depression<br>[1.16] | Conduct<br>[0.92]          | Neonatal<br>[1.28]   | Hemog<br>[1.8]       |
| South Asia        | Iron<br>[1.94]              | Headaches<br>[0.97]         | Typh + Paratyph<br>[32.66]  | Neonatal<br>[1.51]           | Self Harm<br>[1.24]        | Road Inj<br>[0.5]           | Diarrhea<br>[2.04]   | Conduct<br>[0.86]          | Anxiety<br>[0.84]    | Congenital<br>[0.8]  |
| Bangladesh        | Typh + Paratyph<br>[12.21]  | Headaches<br>[1.07]         | Iron<br>[0.85]              | Drown<br>[0.98]              | Neonatal<br>[1.56]         | Self Harm<br>[1.05]         | Anxiety<br>[1.05]    | Road Inj<br>[0.38]         | Depression<br>[1.0]  | Conduct<br>[0.8]     |
| Bhutan            | Iron<br>[2.02]              | Headaches<br>[1.01]         | Neonatal<br>[1.31]          | Road Inj<br>[0.4]            | Conduct<br>[0.81]          | Anxiety<br>[0.92]           | Diarrhea<br>[1.94]   | Back Pain<br>[0.83]        | Mech<br>[2.15]       | Depression<br>[0.77] |
| India             | Iron<br>[2.34]              | Headaches<br>[0.97]         | Typh + Paratyph<br>[45.11]  | Neonatal<br>[1.54]           | Self Harm<br>[1.37]        | Diarrhea<br>[2.29]          | Conduct<br>[0.87]    | Road Inj<br>[0.38]         | Anxiety<br>[0.8]     | Congenital<br>[0.8]  |
| Andhra Pradesh    | Iron<br>[1.84]              | Headaches<br>[0.99]         | Neonatal<br>[1.72]          | Self Harm<br>[1.42]          | Typh + Paratyph<br>[26.69] | Conduct<br>[0.86]           | Depression<br>[0.94] | Anxiety<br>[0.82]          | Diarrhea<br>[1.35]   | Road Inj<br>[0.28]   |
| Arunachal Pradesh | Iron<br>[2.19]              | Headaches<br>[0.98]         | Neonatal<br>[1.62]          | Self Harm<br>[1.13]          | Conduct<br>[0.87]          | Depression<br>[0.88]        | Diarrhea<br>[1.66]   | Typh + Paratyph<br>[28.38] | Anxiety<br>[0.81]    | Road Inj<br>[0.31]   |
| Assam             | Iron<br>[2.93]              | Headaches<br>[0.98]         | Self Harm<br>[1.29]         | Neonatal<br>[1.45]           | Diarrhea<br>[2.14]         | Typh + Paratyph<br>[25.39]  | Conduct<br>[0.86]    | Malaria<br>[101.02]        | Drown<br>[0.73]      | Hep<br>[8.88]        |
| Bihar             | Iron<br>[1.62]              | Diarrhea<br>[2.07]          | Headaches<br>[1.01]         | Neonatal<br>[1.82]           | Typh + Paratyph<br>[4.83]  | Conduct<br>[0.88]           | Vit A<br>[2.06]      | Road Inj<br>[0.31]         | Anxiety<br>[0.81]    | ID<br>[6.78]         |
| Chhattisgarh      | Iron<br>[2.61]              | Typh + Paratyph<br>[25.67]  | Headaches<br>[0.99]         | Neonatal<br>[1.61]           | Self Harm<br>[1.28]        | Diarrhea<br>[1.64]          | Conduct<br>[0.86]    | Road Inj<br>[0.38]         | Vit A<br>[3.22]      | Malaria<br>[49.27]   |
| Delhi             | Iron<br>[7.64]              | Headaches<br>[0.92]         | Neonatal<br>[1.47]          | Typh + Paratyph<br>[1757.38] | Conduct<br>[0.89]          | Anxiety<br>[0.68]           | Road Inj<br>[0.34]   | Diarrhea<br>[3.83]         | Self Harm<br>[0.69]  | Depression<br>[0.62] |
| Goa               | Neonatal<br>[1.82]          | Headaches<br>[0.93]         | Conduct<br>[0.9]            | Self Harm<br>[0.92]          | Road Inj<br>[0.35]         | Anxiety<br>[0.63]           | Depression<br>[0.68] | Congenital<br>[0.87]       | Epilepsy<br>[1.38]   | Diarrhea<br>[3.21]   |
| Gujarat           | Iron<br>[4.26]              | Headaches<br>[0.95]         | Neonatal<br>[1.55]          | Self Harm<br>[1.27]          | Conduct<br>[0.87]          | Typh + Paratyph<br>[62.94]  | Anxiety<br>[0.76]    | Diarrhea<br>[1.83]         | Vit A<br>[3.97]      | Congenital<br>[0.75] |
| Haryana           | Iron<br>[4.26]              | Typh + Paratyph<br>[170.73] | Headaches<br>[0.94]         | Neonatal<br>[1.55]           | Road Inj<br>[0.48]         | Self Harm<br>[1.14]         | Conduct<br>[0.88]    | Diarrhea<br>[2.19]         | Depression<br>[0.84] | Anxiety<br>[0.78]    |
| Himachal Pradesh  | Iron<br>[4.26]              | Headaches<br>[0.94]         | Neonatal<br>[1.69]          | Road Inj<br>[0.45]           | Self Harm<br>[1.05]        | Typh + Paratyph<br>[201.42] | Conduct<br>[0.87]    | Anxiety<br>[0.75]          | Congenital<br>[0.84] | Diarrhea<br>[2.38]   |
| Jammu & Kashmir   | Headaches<br>[0.96]         | Neonatal<br>[1.52]          | Iron<br>[1.43]              | Road Inj<br>[0.51]           | Conduct<br>[0.88]          | Self Harm<br>[0.86]         | Diarrhea<br>[2.05]   | Anxiety<br>[0.79]          | Congenital<br>[0.9]  | Depression<br>[0.67] |
| Jharkhand         | Iron<br>[1.89]              | Diarrhea<br>[2.12]          | Headaches<br>[1.0]          | Road Inj<br>[0.57]           | Neonatal<br>[1.74]         | Typh + Paratyph<br>[9.87]   | Conduct<br>[0.95]    | Drown<br>[0.68]            | Anxiety<br>[0.85]    | Congenital<br>[0.86] |
| Karnataka         | Self Harm<br>[3.15]         | Neonatal<br>[1.82]          | Headaches<br>[0.95]         | Iron<br>[1.35]               | Road Inj<br>[0.44]         | Congenital<br>[1.18]        | Diarrhea<br>[2.34]   | Drown<br>[0.83]            | Conduct<br>[0.74]    | Anxiety<br>[0.81]    |
| Kerala            | Neonatal<br>[2.08]          | Headaches<br>[0.95]         | Self Harm<br>[1.17]         | Conduct<br>[0.85]            | Anxiety<br>[0.82]          | Congenital<br>[0.89]        | Depression<br>[0.71] | Iron<br>[1.0]              | Road Inj<br>[0.26]   | Back Pain<br>[0.53]  |
| Madhya Pradesh    | Iron<br>[2.54]              | Typh + Paratyph<br>[20.59]  | Self Harm<br>[1.68]         | Headaches<br>[1.0]           | Diarrhea<br>[1.62]         | Neonatal<br>[1.54]          | Road Inj<br>[0.44]   | Conduct<br>[0.86]          | Drown<br>[0.67]      | Vit A<br>[2.52]      |
| Maharashtra       | Iron<br>[3.1]               | Headaches<br>[0.95]         | Neonatal<br>[1.66]          | Conduct<br>[0.92]            | Self Harm<br>[1.01]        | Typh + Paratyph<br>[117.69] | Anxiety<br>[0.77]    | Depression<br>[0.76]       | Diarrhea<br>[2.11]   | Congenital<br>[0.78] |
| Manipur           | Headaches<br>[0.97]         | Neonatal<br>[1.73]          | Typh + Paratyph<br>[105.88] | Road Inj<br>[0.45]           | Conduct<br>[0.87]          | Anxiety<br>[0.89]           | Self Harm<br>[0.83]  | HIV<br>[17.0]              | Depression<br>[0.84] | Diarrhea<br>[1.99]   |

**eFigure 7e. Leading ten causes of DALYs with the ratio of observed DALYs to DALYs expected on the basis of Socio-Demographic Index alone in 2017, 10-19 years, both sexes combined.** The top ten causes contributing to DALYs are listed globally, by socio-demographic quintile, and then by GBD superregion, region, country, and subnationally where modeled. For each cell, the ratio of observed DALYs to DALYs expected on the basis of socio-demographic index (SDI) alone are listed. Abbreviations: DALY=disability-adjusted life year, GBD=Global Burden of Disease.

Values shown in brackets represent the ratio of observed DALYs to predicted DALYs on the basis of Socio-Demographic Index (SDI), rounded to two (2) digits. Color ranges (shown below) were calculated to place a roughly equal number of cells into each bin.

| COLOR KEY:                             |                             | [0.0-0.73]                  | [0.73-0.88]         | [0.88-0.95]                 | [0.95-1.01]                | [1.01-1.09]                | [1.09-1.26]          | [1.26-1.55]               | [1.55-2.09]          | 2.09+                |
|----------------------------------------|-----------------------------|-----------------------------|---------------------|-----------------------------|----------------------------|----------------------------|----------------------|---------------------------|----------------------|----------------------|
|                                        | 1                           | 2                           | 3                   | 4                           | 5                          | 6                          | 7                    | 8                         | 9                    | 10                   |
| Meghalaya                              | Iron<br>[2.47]              | Typh + Paratyph<br>[81.31]  | Headaches<br>[0.97] | Neonatal<br>[1.68]          | Malaria<br>[302.03]        | Conduct<br>[0.87]          | Diarrhea<br>[1.85]   | Depression<br>[0.87]      | Anxiety<br>[0.8]     | Congenital<br>[0.77] |
| Mizoram                                | Typh + Paratyph<br>[306.02] | Headaches<br>[0.96]         | Neonatal<br>[1.7]   | Conduct<br>[0.88]           | Malaria<br>[478.44]        | Anxiety<br>[0.78]          | Road Inj<br>[0.34]   | Diarrhea<br>[2.21]        | Iron<br>[0.87]       | HIV<br>[15.42]       |
| Nagaland                               | Iron<br>[3.29]              | Neonatal<br>[1.76]          | Headaches<br>[0.94] | Typh + Paratyph<br>[315.74] | Conduct<br>[0.87]          | HIV<br>[25.88]             | Malaria<br>[869.1]   | Anxiety<br>[0.76]         | Road Inj<br>[0.3]    | Depression<br>[0.71] |
| Odisha                                 | Diarrhea<br>[2.8]           | Headaches<br>[0.99]         | Malaria<br>[143.72] | Self Harm<br>[1.42]         | Iron<br>[1.23]             | Typh + Paratyph<br>[25.03] | Neonatal<br>[1.51]   | Conduct<br>[0.86]         | Road Inj<br>[0.37]   | Depression<br>[0.89] |
| Punjab                                 | Iron<br>[3.72]              | Typh + Paratyph<br>[238.77] | Headaches<br>[0.93] | Neonatal<br>[1.6]           | Road Inj<br>[0.5]          | Conduct<br>[0.88]          | Diarrhea<br>[2.51]   | Self Harm<br>[0.8]        | Congenital<br>[0.89] | Anxiety<br>[0.73]    |
| Rajasthan                              | Typh + Paratyph<br>[23.61]  | Iron<br>[1.59]              | Headaches<br>[0.98] | Neonatal<br>[1.5]           | Conduct<br>[0.87]          | Diarrhea<br>[1.14]         | Road Inj<br>[0.32]   | Anxiety<br>[0.84]         | Self Harm<br>[0.71]  | Vit A<br>[2.3]       |
| Sikkim                                 | Iron<br>[2.85]              | Headaches<br>[0.96]         | Neonatal<br>[1.73]  | Typh + Paratyph<br>[242.85] | Conduct<br>[0.86]          | Self Harm<br>[0.9]         | Anxiety<br>[0.77]    | Road Inj<br>[0.32]        | Diarrhea<br>[2.44]   | Depression<br>[0.72] |
| Tamil Nadu                             | Self Harm<br>[3.39]         | Headaches<br>[0.96]         | Neonatal<br>[1.62]  | Iron<br>[1.69]              | Road Inj<br>[0.55]         | Conduct<br>[0.87]          | Depression<br>[0.95] | Congenital<br>[1.07]      | Diarrhea<br>[2.57]   | Anxiety<br>[0.77]    |
| Telangana                              | Iron<br>[2.8]               | Headaches<br>[0.98]         | Neonatal<br>[1.68]  | Self Harm<br>[1.54]         | Typh + Paratyph<br>[59.33] | Conduct<br>[0.86]          | Depression<br>[0.92] | Diarrhea<br>[2.01]        | Anxiety<br>[0.81]    | Road Inj<br>[0.33]   |
| Tripura                                | Self Harm<br>[1.97]         | Iron<br>[1.61]              | Headaches<br>[0.98] | Neonatal<br>[1.65]          | Conduct<br>[0.87]          | Malaria<br>[124.77]        | Road Inj<br>[0.34]   | Diarrhea<br>[1.52]        | Anxiety<br>[0.81]    | Congenital<br>[0.8]  |
| Uttar Pradesh                          | Iron<br>[2.12]              | Typh + Paratyph<br>[20.65]  | Headaches<br>[1.0]  | Self Harm<br>[1.28]         | Diarrhea<br>[1.54]         | Neonatal<br>[1.46]         | Conduct<br>[0.87]    | Road Inj<br>[0.38]        | Anxiety<br>[0.8]     | Vit A<br>[2.37]      |
| Uttarakhand                            | Iron<br>[3.4]               | Typh + Paratyph<br>[194.57] | Headaches<br>[0.96] | Road Inj<br>[0.7]           | Neonatal<br>[1.69]         | Conduct<br>[0.87]          | Self Harm<br>[0.82]  | Anxiety<br>[0.78]         | Diarrhea<br>[2.18]   | Congenital<br>[0.77] |
| W Bengal                               | Self Harm<br>[2.02]         | Headaches<br>[0.99]         | Iron<br>[1.33]      | Neonatal<br>[1.5]           | Conduct<br>[0.86]          | Diarrhea<br>[1.63]         | Road Inj<br>[0.36]   | Anxiety<br>[0.83]         | Congenital<br>[0.91] | Vit A<br>[2.96]      |
| UTs other than Delhi                   | Iron<br>[3.18]              | Neonatal<br>[1.81]          | Headaches<br>[0.94] | Self Harm<br>[1.26]         | Conduct<br>[0.88]          | Road Inj<br>[0.39]         | Anxiety<br>[0.74]    | Depression<br>[0.77]      | Congenital<br>[0.75] | Back Pain<br>[0.54]  |
| Nepal                                  | Headaches<br>[1.34]         | Road Inj<br>[0.66]          | Neonatal<br>[1.87]  | Typh + Paratyph<br>[4.12]   | Back Pain<br>[1.1]         | Iron<br>[0.61]             | Self Harm<br>[0.89]  | Anxiety<br>[0.95]         | Conduct<br>[0.81]    | Diarrhea<br>[0.75]   |
| Pakistan                               | Road Inj<br>[1.18]          | Headaches<br>[0.89]         | Diarrhea<br>[1.73]  | Neonatal<br>[1.38]          | Iron<br>[0.84]             | TB<br>[2.66]               | Drown<br>[0.79]      | Typh + Paratyph<br>[8.85] | Conduct<br>[0.82]    | Anxiety<br>[0.93]    |
| Southeast Asia, East Asia, and Oceania | Road Inj<br>[0.76]          | Headaches<br>[0.61]         | Neonatal<br>[1.08]  | Drown<br>[1.33]             | Conduct<br>[0.82]          | Anxiety<br>[0.72]          | Back Pain<br>[0.67]  | Congenital<br>[0.85]      | Depression<br>[0.65] | Leukemia<br>[0.91]   |
| East Asia                              | Road Inj<br>[0.6]           | Neonatal<br>[1.36]          | Drown<br>[1.83]     | Anxiety<br>[0.73]           | Headaches<br>[0.45]        | Conduct<br>[0.73]          | Back Pain<br>[0.63]  | Depression<br>[0.59]      | Congenital<br>[0.73] | Leukemia<br>[0.95]   |
| China                                  | Neonatal<br>[1.39]          | Road Inj<br>[0.58]          | Drown<br>[1.77]     | Anxiety<br>[0.73]           | Conduct<br>[0.73]          | Headaches<br>[0.44]        | Back Pain<br>[0.62]  | Depression<br>[0.59]      | Congenital<br>[0.73] | Leukemia<br>[0.94]   |
| N Korea                                | Road Inj<br>[0.99]          | Drown<br>[1.47]             | Headaches<br>[0.58] | Self Harm<br>[0.95]         | Back Pain<br>[0.94]        | Anxiety<br>[0.92]          | Iron<br>[0.74]       | Conduct<br>[0.72]         | Congenital<br>[0.88] | Neonatal<br>[0.72]   |
| Taiwan                                 | Road Inj<br>[0.95]          | Headaches<br>[0.7]          | Back Pain<br>[0.85] | Anxiety<br>[0.71]           | Conduct<br>[0.86]          | Depression<br>[0.53]       | Neonatal<br>[0.55]   | Congenital<br>[0.71]      | Self Harm<br>[0.43]  | Drugs<br>[0.88]      |
| Oceania                                | Self Harm<br>[2.73]         | Road Inj<br>[0.96]          | Drown<br>[1.46]     | LRI<br>[1.46]               | Iron<br>[1.02]             | RHD<br>[4.35]              | Diarrhea<br>[1.47]   | Asthma<br>[2.08]          | Headaches<br>[0.73]  | Conduct<br>[0.87]    |
| Am Samoa                               | Headaches<br>[0.68]         | Conduct<br>[0.88]           | Drown<br>[1.41]     | Iron<br>[1.79]              | Self Harm<br>[0.87]        | Anxiety<br>[0.78]          | Asthma<br>[1.5]      | Back Pain<br>[0.75]       | Road Inj<br>[0.35]   | Depression<br>[0.76] |
| Micronesia                             | Self Harm<br>[2.17]         | Road Inj<br>[0.64]          | Iron<br>[1.44]      | Headaches<br>[0.7]          | Drown<br>[0.95]            | Conduct<br>[0.87]          | Anxiety<br>[0.88]    | Asthma<br>[1.47]          | Depression<br>[0.87] | Back Pain<br>[0.82]  |
| Fiji                                   | Self Harm<br>[1.43]         | Headaches<br>[0.69]         | Drown<br>[1.18]     | Road Inj<br>[0.45]          | Iron<br>[1.45]             | Conduct<br>[0.87]          | Asthma<br>[1.71]     | LRI<br>[1.77]             | Anxiety<br>[0.83]    | Congenital<br>[1.03] |

**eFigure 7e. Leading ten causes of DALYs with the ratio of observed DALYs to DALYs expected on the basis of Socio-Demographic Index alone in 2017, 10-19 years, both sexes combined.** The top ten causes contributing to DALYs are listed globally, by socio-demographic quintile, and then by GBD superregion, region, country, and subnationally where modeled. For each cell, the ratio of observed DALYs to DALYs expected on the basis of socio-demographic index (SDI) alone are listed. Abbreviations: DALY=disability-adjusted life year, GBD=Global Burden of Disease.

Values shown in brackets represent the ratio of observed DALYs to predicted DALYs on the basis of Socio-Demographic Index (SDI), rounded to two (2) digits. Color ranges (shown below) were calculated to place a roughly equal number of cells into each bin.

| COLOR KEY:                        |                     | [0.0-0.73]               | [0.73-0.88]                 | [0.88-0.95]                 | [0.95-1.01]                | [1.01-1.09]          | [1.09-1.26]          | [1.26-1.55]          | [1.55-2.09]                | 2.09+                       |
|-----------------------------------|---------------------|--------------------------|-----------------------------|-----------------------------|----------------------------|----------------------|----------------------|----------------------|----------------------------|-----------------------------|
|                                   | 1                   | 2                        | 3                           | 4                           | 5                          | 6                    | 7                    | 8                    | 9                          | 10                          |
| Guam                              | Self Harm<br>[2.98] | Headaches<br>[0.68]      | Road Inj<br>[0.57]          | Depression<br>[0.97]        | Conduct<br>[0.91]          | Diarrhea<br>[6.68]   | Anxiety<br>[0.71]    | Back Pain<br>[0.68]  | Asthma<br>[1.33]           | Neonatal<br>[0.74]          |
| Kiribati                          | Self Harm<br>[3.37] | Iron<br>[1.08]           | TB<br>[2.4]                 | Meningitis<br>[1.64]        | Congenital<br>[1.38]       | Asthma<br>[1.9]      | Diarrhea<br>[0.99]   | Headaches<br>[0.76]  | LRI<br>[0.78]              | Road Inj<br>[0.38]          |
| Marshall                          | Self Harm<br>[2.7]  | Road Inj<br>[0.84]       | Drown<br>[1.16]             | Iron<br>[1.2]               | Headaches<br>[0.71]        | Conduct<br>[0.87]    | Congenital<br>[1.08] | LRI<br>[1.12]        | RHD<br>[4.06]              | Anxiety<br>[0.89]           |
| N Mariana                         | Self Harm<br>[1.7]  | Headaches<br>[0.71]      | Road Inj<br>[0.47]          | Drown<br>[2.07]             | Conduct<br>[0.87]          | Anxiety<br>[0.74]    | Depression<br>[0.87] | Back Pain<br>[0.73]  | Neonatal<br>[0.87]         | Asthma<br>[1.38]            |
| PNG                               | Self Harm<br>[2.9]  | Road Inj<br>[1.01]       | Drown<br>[1.61]             | LRI<br>[1.36]               | RHD<br>[4.4]               | Diarrhea<br>[1.2]    | Iron<br>[0.88]       | Asthma<br>[2.16]     | Headaches<br>[0.76]        | Maternal<br>[1.75]          |
| Samoa                             | Self Harm<br>[1.53] | Headaches<br>[0.7]       | Iron<br>[1.13]              | Road Inj<br>[0.44]          | Conduct<br>[0.87]          | Anxiety<br>[0.88]    | Back Pain<br>[0.81]  | Depression<br>[0.84] | Asthma<br>[1.32]           | Drown<br>[0.66]             |
| Solomon                           | Self Harm<br>[2.05] | Iron<br>[1.23]           | LRI<br>[1.39]               | Road Inj<br>[0.69]          | Drown<br>[1.05]            | Headaches<br>[0.75]  | Conduct<br>[0.87]    | Congenital<br>[0.98] | Anxiety<br>[0.9]           | Depression<br>[0.84]        |
| Tonga                             | Road Inj<br>[0.52]  | Headaches<br>[0.69]      | Asthma<br>[1.73]            | Conduct<br>[0.87]           | Drown<br>[0.96]            | Anxiety<br>[0.85]    | Self Harm<br>[0.88]  | Back Pain<br>[0.81]  | Meningitis<br>[3.58]       | Depression<br>[0.78]        |
| Vanuatu                           | Self Harm<br>[2.19] | Iron<br>[1.41]           | Road Inj<br>[0.71]          | Drown<br>[1.15]             | Headaches<br>[0.72]        | Asthma<br>[1.61]     | Conduct<br>[0.87]    | LRI<br>[0.8]         | Congenital<br>[0.98]       | RHD<br>[2.9]                |
| <b>Southeast Asia</b>             | Road Inj<br>[0.97]  | Headaches<br>[0.83]      | Conduct<br>[0.93]           | Congenital<br>[0.98]        | Back Pain<br>[0.74]        | Anxiety<br>[0.72]    | Depression<br>[0.73] | Drown<br>[0.74]      | Neonatal<br>[0.72]         | Typh + Paratyph<br>[144.45] |
| Cambodia                          | Road Inj<br>[1.02]  | Iron<br>[1.08]           | Headaches<br>[0.88]         | Mech<br>[3.26]              | Drown<br>[0.98]            | Conduct<br>[0.89]    | Back Pain<br>[1.05]  | Malaria<br>[26.73]   | Congenital<br>[0.92]       | Depression<br>[0.87]        |
| Indonesia                         | Road Inj<br>[0.99]  | Headaches<br>[0.83]      | Conduct<br>[0.98]           | Typh + Paratyph<br>[264.69] | Back Pain<br>[0.74]        | Anxiety<br>[0.72]    | Neonatal<br>[0.74]   | TB<br>[11.28]        | Congenital<br>[0.78]       | Depression<br>[0.64]        |
| Laos                              | Road Inj<br>[1.31]  | Headaches<br>[0.86]      | Iron<br>[0.91]              | Drown<br>[0.82]             | Conduct<br>[0.89]          | Anxiety<br>[1.01]    | Back Pain<br>[0.89]  | Congenital<br>[0.95] | Typh + Paratyph<br>[13.74] | Depression<br>[0.79]        |
| Malaysia                          | Road Inj<br>[1.31]  | Depression<br>[1.38]     | Headaches<br>[0.76]         | Conduct<br>[0.92]           | Anxiety<br>[0.82]          | Neonatal<br>[0.8]    | Back Pain<br>[0.64]  | Congenital<br>[0.85] | Dermatitis<br>[0.91]       | Drown<br>[1.14]             |
| Maldives                          | Headaches<br>[0.82] | Conduct<br>[0.91]        | Iron<br>[1.4]               | Depression<br>[0.85]        | Anxiety<br>[0.72]          | Back Pain<br>[0.7]   | Road Inj<br>[0.28]   | Congenital<br>[0.78] | Neonatal<br>[0.66]         | Dermatitis<br>[0.87]        |
| Mauritius                         | Headaches<br>[0.81] | Road Inj<br>[0.6]        | Iron<br>[3.15]              | Depression<br>[1.15]        | Conduct<br>[0.9]           | Self Harm<br>[0.92]  | Congenital<br>[1.05] | Neonatal<br>[0.83]   | Back Pain<br>[0.72]        | Anxiety<br>[0.68]           |
| Myanmar                           | Road Inj<br>[1.09]  | Exec & Police<br>[289.4] | Headaches<br>[0.85]         | Congenital<br>[1.41]        | Typh + Paratyph<br>[35.02] | Conduct<br>[0.89]    | Drown<br>[0.76]      | Iron<br>[0.81]       | Malaria<br>[148.79]        | Anxiety<br>[0.8]            |
| Philippines                       | Headaches<br>[0.83] | LRI<br>[1.92]            | Road Inj<br>[0.47]          | Congenital<br>[1.26]        | Conduct<br>[0.9]           | Violence<br>[1.12]   | Back Pain<br>[0.88]  | Asthma<br>[1.46]     | Anxiety<br>[0.76]          | Drown<br>[0.76]             |
| Sri Lanka                         | Headaches<br>[0.81] | Self Harm<br>[1.21]      | Conduct<br>[0.91]           | Congenital<br>[1.19]        | Depression<br>[0.9]        | Anxiety<br>[0.71]    | Neonatal<br>[0.75]   | Road Inj<br>[0.31]   | Back Pain<br>[0.63]        | Drown<br>[0.76]             |
| Seychelles                        | Headaches<br>[0.82] | Drown<br>[1.88]          | Road Inj<br>[0.53]          | Conduct<br>[0.91]           | Congenital<br>[1.13]       | Neonatal<br>[0.82]   | Anxiety<br>[0.7]     | Depression<br>[0.77] | Back Pain<br>[0.69]        | LRI<br>[1.85]               |
| Thailand                          | Road Inj<br>[1.82]  | Headaches<br>[0.92]      | Conduct<br>[0.9]            | Drown<br>[1.17]             | Anxiety<br>[0.71]          | Depression<br>[0.79] | Violence<br>[1.22]   | Back Pain<br>[0.7]   | Self Harm<br>[0.75]        | Congenital<br>[0.88]        |
| Timor-Leste                       | Iron<br>[1.32]      | Road Inj<br>[0.59]       | Headaches<br>[0.86]         | Conduct<br>[0.89]           | Congenital<br>[1.02]       | Depression<br>[0.94] | HIV<br>[11.92]       | Drown<br>[0.68]      | Anxiety<br>[0.8]           | Back Pain<br>[0.77]         |
| Vietnam                           | Road Inj<br>[1.06]  | Headaches<br>[0.84]      | Drown<br>[1.32]             | Conduct<br>[0.9]            | Congenital<br>[1.0]        | Depression<br>[0.75] | Back Pain<br>[0.66]  | Neonatal<br>[0.62]   | Epilepsy<br>[0.93]         | Anxiety<br>[0.5]            |
| <b>Sub-Saharan Africa</b>         | HIV<br>[45.35]      | Malaria<br>[26.89]       | Iron<br>[1.14]              | Road Inj<br>[0.57]          | Diarrhea<br>[1.25]         | Headaches<br>[0.8]   | Conduct<br>[0.94]    | Depression<br>[1.05] | Anxiety<br>[0.96]          | Epilepsy<br>[1.23]          |
| <b>Central Sub-Saharan Africa</b> | Malaria<br>[58.01]  | Road Inj<br>[1.06]       | HIV<br>[28.33]              | Diarrhea<br>[1.4]           | Iron<br>[0.88]             | Oncho<br>[244.55]    | Headaches<br>[0.79]  | Depression<br>[1.21] | TB<br>[2.06]               | Epilepsy<br>[1.5]           |
| Angola                            | Road Inj<br>[1.05]  | Iron<br>[1.62]           | Diarrhea<br>[1.79]          | Malaria<br>[28.2]           | HIV<br>[19.03]             | Headaches<br>[0.78]  | Epilepsy<br>[1.72]   | Depression<br>[1.21] | Conduct<br>[0.93]          | Yellow Fev<br>[15.47]       |
| C African Rep                     | HIV<br>[66.55]      | Road Inj<br>[2.34]       | Conflict Terror<br>[167.57] | Malaria<br>[5.45]           | TB<br>[2.24]               | Diarrhea<br>[1.05]   | Iron<br>[0.99]       | Hemog<br>[2.77]      | Meningitis<br>[1.02]       | LRI<br>[0.81]               |
| Congo                             | HIV<br>[125.31]     | Malaria<br>[781.81]      | Road Inj<br>[1.18]          | Iron<br>[1.78]              | Diarrhea<br>[3.26]         | Headaches<br>[0.75]  | Epilepsy<br>[1.96]   | Depression<br>[1.21] | Conduct<br>[0.94]          | Neonatal<br>[1.06]          |

**eFigure 7e. Leading ten causes of DALYs with the ratio of observed DALYs to DALYs expected on the basis of Socio-Demographic Index alone in 2017, 10-19 years, both sexes combined.** The top ten causes contributing to DALYs are listed globally, by socio-demographic quintile, and then by GBD superregion, region, country, and subnationally where modeled. For each cell, the ratio of observed DALYs to DALYs expected on the basis of socio-demographic index (SDI) alone are listed. Abbreviations: DALY=disability-adjusted life year, GBD=Global Burden of Disease.

Values shown in brackets represent the ratio of observed DALYs to predicted DALYs on the basis of Socio-Demographic Index (SDI), rounded to two (2) digits. Color ranges (shown below) were calculated to place a roughly equal number of cells into each bin.

| COLOR KEY:                 |                      | [0.0-0.73]           | [0.73-0.88]        | [0.88-0.95]          | [0.95-1.01]          | [1.01-1.09]          | [1.09-1.26]          | [1.26-1.55]          | [1.55-2.09]          | 2.09+                |
|----------------------------|----------------------|----------------------|--------------------|----------------------|----------------------|----------------------|----------------------|----------------------|----------------------|----------------------|
|                            | 1                    | 2                    | 3                  | 4                    | 5                    | 6                    | 7                    | 8                    | 9                    | 10                   |
| Congo DR                   | Malaria<br>[9.15]    | Road Inj<br>[0.86]   | HIV<br>[18.48]     | Oncho<br>[150.6]     | Diarrhea<br>[0.73]   | Headaches<br>[0.83]  | TB<br>[1.13]         | Hemog<br>[2.0]       | Depression<br>[1.19] | Conduct<br>[0.94]    |
| Eq Guinea                  | HIV<br>[170.14]      | Malaria<br>[3225.92] | Road Inj<br>[0.89] | Headaches<br>[0.72]  | Iron<br>[1.62]       | Depression<br>[1.22] | Epilepsy<br>[2.06]   | Conduct<br>[0.98]    | Anxiety<br>[0.86]    | Back Pain<br>[0.82]  |
| Gabon                      | Malaria<br>[3901.58] | Road Inj<br>[1.16]   | HIV<br>[75.92]     | Iron<br>[2.79]       | Headaches<br>[0.75]  | Depression<br>[1.22] | Epilepsy<br>[2.26]   | Neonatal<br>[1.2]    | Conduct<br>[0.93]    | Anxiety<br>[0.87]    |
| Eastern Sub-Saharan Africa | HIV<br>[52.29]       | Diarrhea<br>[1.0]    | Malaria<br>[4.25]  | Iron<br>[0.78]       | Road Inj<br>[0.49]   | Epilepsy<br>[1.36]   | Depression<br>[1.12] | Conduct<br>[0.96]    | TB<br>[1.09]         | Anxiety<br>[1.02]    |
| Burundi                    | HIV<br>[33.04]       | Malaria<br>[2.93]    | Road Inj<br>[0.64] | TB<br>[1.28]         | Diarrhea<br>[0.67]   | Epilepsy<br>[1.25]   | Depression<br>[1.13] | LRI<br>[0.58]        | Conduct<br>[0.94]    | Anxiety<br>[1.05]    |
| Comoros                    | Road Inj<br>[0.55]   | Diarrhea<br>[1.22]   | Epilepsy<br>[1.51] | Neonatal<br>[1.54]   | Iron<br>[0.67]       | Conduct<br>[0.92]    | Headaches<br>[0.61]  | Anxiety<br>[1.01]    | LRI<br>[0.72]        | Depression<br>[0.99] |
| Djibouti                   | HIV<br>[39.79]       | Road Inj<br>[0.65]   | Epilepsy<br>[1.65] | Depression<br>[1.14] | Conduct<br>[0.95]    | Neonatal<br>[1.28]   | Headaches<br>[0.58]  | Iron<br>[0.7]        | Anxiety<br>[0.98]    | Diarrhea<br>[1.06]   |
| Eritrea                    | HIV<br>[23.83]       | Diarrhea<br>[1.72]   | Road Inj<br>[0.8]  | Iron<br>[1.28]       | TB<br>[2.68]         | Epilepsy<br>[1.75]   | LRI<br>[0.88]        | Meningitis<br>[1.21] | Maternal<br>[1.55]   | Depression<br>[1.15] |
| Ethiopia                   | HIV<br>[22.66]       | Diarrhea<br>[0.84]   | Conduct<br>[1.01]  | Road Inj<br>[0.35]   | Depression<br>[1.04] | Epilepsy<br>[1.15]   | Meningitis<br>[0.66] | Anxiety<br>[1.04]    | Neonatal<br>[1.72]   | Headaches<br>[0.62]  |
| Kenya                      | HIV<br>[71.59]       | Neonatal<br>[1.71]   | Diarrhea<br>[1.88] | Road Inj<br>[0.47]   | Conduct<br>[1.0]     | Epilepsy<br>[1.59]   | Headaches<br>[0.59]  | Meningitis<br>[1.76] | Anxiety<br>[0.99]    | Congenital<br>[1.0]  |
| Baringo                    | Diarrhea<br>[1.48]   | Neonatal<br>[1.83]   | HIV<br>[12.4]      | Conduct<br>[1.0]     | Road Inj<br>[0.42]   | Meningitis<br>[1.38] | Epilepsy<br>[1.5]    | Headaches<br>[0.61]  | Congenital<br>[1.0]  | Anxiety<br>[0.99]    |
| Bomet                      | HIV<br>[99.01]       | Neonatal<br>[2.08]   | Diarrhea<br>[1.73] | Conduct<br>[1.0]     | Headaches<br>[0.6]   | Anxiety<br>[1.0]     | Depression<br>[0.94] | Epilepsy<br>[1.19]   | Congenital<br>[0.87] | Road Inj<br>[0.31]   |
| Bungoma                    | HIV<br>[22.63]       | Malaria<br>[35.22]   | Neonatal<br>[1.88] | Diarrhea<br>[1.44]   | Conduct<br>[1.0]     | Headaches<br>[0.6]   | Anxiety<br>[0.99]    | Road Inj<br>[0.36]   | Depression<br>[0.92] | Epilepsy<br>[1.22]   |
| Busia                      | HIV<br>[37.51]       | Malaria<br>[35.29]   | Neonatal<br>[1.82] | Diarrhea<br>[1.15]   | Iron<br>[0.77]       | Conduct<br>[0.99]    | Road Inj<br>[0.38]   | Headaches<br>[0.61]  | Anxiety<br>[0.99]    | Epilepsy<br>[1.22]   |
| Elgeyo-Marakwet            | HIV<br>[30.7]        | Diarrhea<br>[2.3]    | Neonatal<br>[2.03] | Epilepsy<br>[1.66]   | Conduct<br>[1.0]     | Meningitis<br>[1.9]  | Road Inj<br>[0.42]   | Headaches<br>[0.59]  | Anxiety<br>[0.99]    | Congenital<br>[1.03] |
| Embu                       | HIV<br>[58.06]       | Neonatal<br>[1.9]    | Diarrhea<br>[2.39] | Conduct<br>[1.0]     | Epilepsy<br>[1.56]   | Headaches<br>[0.59]  | Road Inj<br>[0.41]   | Anxiety<br>[0.98]    | Depression<br>[0.96] | Congenital<br>[1.0]  |
| Garissa                    | HIV<br>[27.19]       | Iron<br>[0.82]       | Diarrhea<br>[0.72] | Neonatal<br>[2.54]   | Conduct<br>[1.03]    | Road Inj<br>[0.36]   | Epilepsy<br>[1.25]   | Meningitis<br>[0.69] | Headaches<br>[0.64]  | TB<br>[0.75]         |
| HomaBay                    | HIV<br>[224.99]      | Road Inj<br>[1.09]   | Diarrhea<br>[1.42] | Malaria<br>[11.99]   | Violence<br>[1.29]   | Meningitis<br>[1.35] | Epilepsy<br>[1.6]    | TB<br>[1.61]         | Conduct<br>[0.99]    | LRI<br>[0.78]        |
| Isiolo                     | HIV<br>[27.04]       | Conflict<br>[127.51] | Diarrhea<br>[0.81] | Meningitis<br>[1.08] | Road Inj<br>[0.42]   | Epilepsy<br>[1.39]   | Conduct<br>[1.01]    | Neonatal<br>[1.67]   | TB<br>[1.1]          | Congenital<br>[1.04] |
| Kajiado                    | HIV<br>[55.27]       | Neonatal<br>[2.08]   | Epilepsy<br>[1.78] | Conduct<br>[1.0]     | Diarrhea<br>[1.93]   | Road Inj<br>[0.42]   | Headaches<br>[0.59]  | Meningitis<br>[2.24] | Anxiety<br>[0.99]    | Depression<br>[0.96] |
| Kakamega                   | HIV<br>[68.13]       | Malaria<br>[20.59]   | Diarrhea<br>[1.38] | Iron<br>[0.81]       | Road Inj<br>[0.44]   | Neonatal<br>[1.53]   | Conduct<br>[0.99]    | Epilepsy<br>[1.35]   | Headaches<br>[0.61]  | Meningitis<br>[1.23] |
| Kericho                    | HIV<br>[55.09]       | Neonatal<br>[2.21]   | Diarrhea<br>[1.64] | Conduct<br>[1.0]     | Headaches<br>[0.59]  | Anxiety<br>[0.99]    | Epilepsy<br>[1.34]   | Depression<br>[0.95] | Congenital<br>[0.95] | Road Inj<br>[0.34]   |
| Kiambu                     | HIV<br>[87.75]       | Neonatal<br>[1.97]   | Road Inj<br>[0.53] | Epilepsy<br>[2.04]   | Conduct<br>[1.0]     | Headaches<br>[0.58]  | Violence<br>[1.09]   | Anxiety<br>[0.98]    | Diarrhea<br>[2.24]   | Meningitis<br>[2.99] |
| Kilifi                     | HIV<br>[42.5]        | Neonatal<br>[1.77]   | Diarrhea<br>[1.29] | Conduct<br>[1.0]     | Road Inj<br>[0.39]   | Headaches<br>[0.6]   | Anxiety<br>[0.99]    | Malaria<br>[13.81]   | Epilepsy<br>[1.27]   | Congenital<br>[0.96] |
| Kirinyaga                  | HIV<br>[55.29]       | Neonatal<br>[1.95]   | Diarrhea<br>[2.33] | Road Inj<br>[0.49]   | Conduct<br>[0.99]    | Epilepsy<br>[1.71]   | Headaches<br>[0.59]  | Anxiety<br>[0.99]    | Congenital<br>[1.03] | Depression<br>[0.96] |
| Kisii                      | HIV<br>[30.13]       | Diarrhea<br>[2.91]   | Neonatal<br>[1.48] | Road Inj<br>[0.52]   | Epilepsy<br>[1.76]   | Conduct<br>[1.0]     | Meningitis<br>[2.28] | Headaches<br>[0.59]  | Congenital<br>[1.07] | Anxiety<br>[0.99]    |
| Kisumu                     | HIV<br>[180.55]      | Malaria<br>[97.97]   | Diarrhea<br>[2.14] | Epilepsy<br>[2.12]   | Meningitis<br>[2.27] | Violence<br>[1.16]   | TB<br>[3.39]         | Road Inj<br>[0.47]   | Conduct<br>[0.98]    | LRI<br>[1.06]        |
| Kitui                      | HIV<br>[46.31]       | Neonatal<br>[2.16]   | Diarrhea<br>[1.52] | Conduct<br>[1.0]     | Epilepsy<br>[1.43]   | Headaches<br>[0.61]  | Road Inj<br>[0.37]   | Anxiety<br>[1.0]     | Meningitis<br>[1.24] | Depression<br>[0.94] |
| Kwale                      | HIV<br>[44.6]        | Iron<br>[0.98]       | Neonatal<br>[1.77] | Malaria<br>[19.3]    | Diarrhea<br>[1.11]   | Conduct<br>[0.99]    | Epilepsy<br>[1.41]   | Road Inj<br>[0.38]   | Headaches<br>[0.6]   | Anxiety<br>[0.99]    |
| Laikipia                   | HIV<br>[98.37]       | Neonatal<br>[2.08]   | Diarrhea<br>[2.28] | Conduct<br>[1.01]    | Headaches<br>[0.58]  | Epilepsy<br>[1.53]   | Anxiety<br>[0.97]    | Depression<br>[0.96] | Congenital<br>[0.95] | Road Inj<br>[0.32]   |

**eFigure 7e. Leading ten causes of DALYs with the ratio of observed DALYs to DALYs expected on the basis of Socio-Demographic Index alone in 2017, 10-19 years, both sexes combined.** The top ten causes contributing to DALYs are listed globally, by socio-demographic quintile, and then by GBD superregion, region, country, and subnationally where modeled. For each cell, the ratio of observed DALYs to DALYs expected on the basis of socio-demographic index (SDI) alone are listed. Abbreviations: DALY=disability-adjusted life year, GBD=Global Burden of Disease.

Values shown in brackets represent the ratio of observed DALYs to predicted DALYs on the basis of Socio-Demographic Index (SDI), rounded to two (2) digits. Color ranges (shown below) were calculated to place a roughly equal number of cells into each bin.

| COLOR KEY:   |                                | [0.0-0.73]         | [0.73-0.88]               | [0.88-0.95]          | [0.95-1.01]          | [1.01-1.09]          | [1.09-1.26]          | [1.26-1.55]          | [1.55-2.09]          | 2.09+                |
|--------------|--------------------------------|--------------------|---------------------------|----------------------|----------------------|----------------------|----------------------|----------------------|----------------------|----------------------|
|              | 1                              | 2                  | 3                         | 4                    | 5                    | 6                    | 7                    | 8                    | 9                    | 10                   |
| Lamu         | Conflict<br>Terror<br>[903.69] | HIV<br>[27.19]     | Exec & Police<br>[244.81] | Neonatal<br>[1.52]   | Conduct<br>[1.0]     | Diarrhea<br>[1.1]    | Epilepsy<br>[1.48]   | Meningitis<br>[1.36] | Headaches<br>[0.61]  | Road Inj<br>[0.36]   |
| Machakos     | HIV<br>[69.75]                 | Neonatal<br>[1.97] | Diarrhea<br>[1.83]        | Conduct<br>[1.0]     | Headaches<br>[0.59]  | Epilepsy<br>[1.47]   | Anxiety<br>[0.98]    | Road Inj<br>[0.37]   | Depression<br>[0.95] | Congenital<br>[0.95] |
| Makueni      | HIV<br>[114.86]                | Neonatal<br>[2.0]  | Diarrhea<br>[1.49]        | Conduct<br>[0.99]    | Headaches<br>[0.61]  | Anxiety<br>[0.99]    | Epilepsy<br>[1.29]   | Depression<br>[0.95] | Congenital<br>[0.89] | Road Inj<br>[0.3]    |
| Mandera      | HIV<br>[19.25]                 | Diarrhea<br>[0.6]  | Road Inj<br>[0.4]         | Tetanus<br>[6.08]    | Meningitis<br>[0.67] | TB<br>[0.76]         | Conduct<br>[1.04]    | Epilepsy<br>[1.23]   | Neonatal<br>[2.1]    | Iron<br>[0.49]       |
| Marsabit     | HIV<br>[30.27]                 | Diarrhea<br>[0.9]  | Neonatal<br>[2.69]        | Conduct<br>[1.02]    | Meningitis<br>[0.76] | Road Inj<br>[0.36]   | Epilepsy<br>[1.17]   | Tetanus<br>[8.35]    | Headaches<br>[0.65]  | Anxiety<br>[1.01]    |
| Meru         | HIV<br>[73.72]                 | Neonatal<br>[1.94] | Diarrhea<br>[1.91]        | Conduct<br>[0.99]    | Road Inj<br>[0.43]   | Epilepsy<br>[1.51]   | Headaches<br>[0.6]   | Anxiety<br>[0.99]    | Congenital<br>[1.0]  | Depression<br>[0.96] |
| Migori       | HIV<br>[142.69]                | Malaria<br>[12.3]  | Diarrhea<br>[1.47]        | Road Inj<br>[0.6]    | Meningitis<br>[1.52] | Epilepsy<br>[1.68]   | LRI<br>[0.88]        | TB<br>[1.61]         | Conduct<br>[1.0]     | Congenital<br>[1.11] |
| Mombasa      | HIV<br>[66.53]                 | Neonatal<br>[1.52] | Iron<br>[1.29]            | Conduct<br>[0.98]    | Epilepsy<br>[1.68]   | Headaches<br>[0.59]  | Anxiety<br>[0.99]    | Depression<br>[0.97] | Road Inj<br>[0.38]   | Diarrhea<br>[2.0]    |
| Murang'a     | HIV<br>[67.96]                 | Neonatal<br>[1.98] | Diarrhea<br>[2.28]        | Conduct<br>[1.0]     | Road Inj<br>[0.44]   | Headaches<br>[0.59]  | Epilepsy<br>[1.54]   | Anxiety<br>[0.98]    | Depression<br>[0.95] | Congenital<br>[0.99] |
| Nairobi      | HIV<br>[59.85]                 | Neonatal<br>[1.71] | Road Inj<br>[0.61]        | Epilepsy<br>[2.73]   | Violence<br>[1.69]   | Conduct<br>[0.99]    | Headaches<br>[0.58]  | Meningitis<br>[6.24] | Anxiety<br>[0.9]     | Depression<br>[0.95] |
| Nakuru       | HIV<br>[102.15]                | Neonatal<br>[1.74] | Epilepsy<br>[1.79]        | Diarrhea<br>[2.14]   | Conduct<br>[1.0]     | Headaches<br>[0.58]  | Anxiety<br>[0.98]    | Depression<br>[0.95] | Congenital<br>[0.99] | Road Inj<br>[0.34]   |
| Nandi        | HIV<br>[52.01]                 | Neonatal<br>[2.11] | Diarrhea<br>[1.61]        | Conduct<br>[1.0]     | Road Inj<br>[0.43]   | Epilepsy<br>[1.52]   | Headaches<br>[0.6]   | Anxiety<br>[0.99]    | Depression<br>[0.95] | Congenital<br>[0.96] |
| Narok        | Neonatal<br>[2.64]             | HIV<br>[15.69]     | Diarrhea<br>[1.11]        | Road Inj<br>[0.45]   | Meningitis<br>[1.17] | Epilepsy<br>[1.54]   | Conduct<br>[1.0]     | Violence<br>[0.9]    | Headaches<br>[0.63]  | Congenital<br>[0.99] |
| Nyamira      | HIV<br>[72.16]                 | Road Inj<br>[0.81] | Diarrhea<br>[3.25]        | Epilepsy<br>[2.45]   | Neonatal<br>[1.7]    | Meningitis<br>[3.77] | LRI<br>[1.58]        | Violence<br>[1.29]   | TB<br>[5.42]         | Conduct<br>[1.0]     |
| Nyandarua    | HIV<br>[61.49]                 | Neonatal<br>[2.06] | Road Inj<br>[0.7]         | Epilepsy<br>[2.35]   | Diarrhea<br>[2.62]   | Meningitis<br>[3.26] | Violence<br>[1.32]   | LRI<br>[1.38]        | TB<br>[4.68]         | Conduct<br>[1.0]     |
| Nyeri        | HIV<br>[108.54]                | Neonatal<br>[1.92] | Road Inj<br>[0.52]        | Epilepsy<br>[1.9]    | Conduct<br>[1.0]     | Diarrhea<br>[2.25]   | Meningitis<br>[2.86] | Headaches<br>[0.59]  | Anxiety<br>[0.98]    | Congenital<br>[1.09] |
| Samburu      | HIV<br>[53.98]                 | Neonatal<br>[3.13] | Diarrhea<br>[0.71]        | Conduct<br>[1.03]    | Tetanus<br>[6.21]    | Headaches<br>[0.66]  | TB<br>[0.68]         | Anxiety<br>[1.01]    | Meningitis<br>[0.56] | Road Inj<br>[0.29]   |
| Siaya        | HIV<br>[85.45]                 | Malaria<br>[40.82] | Diarrhea<br>[1.36]        | Conduct<br>[0.99]    | Headaches<br>[0.61]  | Anxiety<br>[1.0]     | Depression<br>[0.95] | Congenital<br>[0.95] | Epilepsy<br>[1.22]   | Neonatal<br>[1.13]   |
| TaitaTaveta  | HIV<br>[96.85]                 | Neonatal<br>[1.76] | Epilepsy<br>[1.9]         | Road Inj<br>[0.47]   | Conduct<br>[1.0]     | Diarrhea<br>[1.83]   | Meningitis<br>[2.3]  | Headaches<br>[0.58]  | Congenital<br>[1.07] | Anxiety<br>[0.98]    |
| TanaRiver    | HIV<br>[49.99]                 | TB<br>[1.71]       | Road Inj<br>[0.51]        | Meningitis<br>[1.23] | Iron<br>[0.77]       | Epilepsy<br>[1.65]   | Neonatal<br>[2.1]    | Diarrhea<br>[0.8]    | LRI<br>[0.77]        | Violence<br>[1.03]   |
| TharakaNithi | Diarrhea<br>[2.67]             | Road Inj<br>[0.58] | Epilepsy<br>[2.0]         | Neonatal<br>[1.48]   | Conduct<br>[0.99]    | Meningitis<br>[2.49] | Malaria<br>[113.17]  | Violence<br>[1.03]   | Headaches<br>[0.59]  | Anxiety<br>[0.99]    |
| TransNzoia   | HIV<br>[94.13]                 | Neonatal<br>[1.99] | Diarrhea<br>[1.77]        | Conduct<br>[1.0]     | Headaches<br>[0.6]   | Anxiety<br>[0.99]    | Depression<br>[0.96] | Epilepsy<br>[1.28]   | Road Inj<br>[0.34]   | Congenital<br>[0.91] |
| Turkana      | HIV<br>[85.75]                 | Diarrhea<br>[0.8]  | Tetanus<br>[6.84]         | Neonatal<br>[2.63]   | Iron<br>[0.61]       | Conduct<br>[1.03]    | Meningitis<br>[0.64] | TB<br>[0.69]         | Road Inj<br>[0.31]   | Headaches<br>[0.66]  |
| UasinGishu   | HIV<br>[66.31]                 | Neonatal<br>[1.83] | Diarrhea<br>[2.35]        | Conduct<br>[0.99]    | Headaches<br>[0.59]  | Anxiety<br>[0.99]    | Epilepsy<br>[1.49]   | Dermatitis<br>[1.8]  | Depression<br>[0.95] | Congenital<br>[0.97] |
| Vihiga       | HIV<br>[37.54]                 | Diarrhea<br>[1.76] | Neonatal<br>[1.77]        | Road Inj<br>[0.52]   | Malaria<br>[29.69]   | Epilepsy<br>[1.68]   | Meningitis<br>[1.77] | Conduct<br>[0.99]    | LRI<br>[0.91]        | Headaches<br>[0.61]  |
| Wajir        | HIV<br>[21.0]                  | Diarrhea<br>[0.69] | Tetanus<br>[4.41]         | Neonatal<br>[2.99]   | Maternal<br>[0.62]   | Road Inj<br>[0.37]   | Meningitis<br>[0.6]  | Conduct<br>[1.06]    | Epilepsy<br>[1.13]   | TB<br>[0.54]         |
| WestPokot    | HIV<br>[16.28]                 | Diarrhea<br>[1.11] | Neonatal<br>[2.51]        | Conduct<br>[1.01]    | Leish<br>[22.18]     | Malaria<br>[2.8]     | Headaches<br>[0.63]  | Meningitis<br>[0.83] | Anxiety<br>[1.01]    | Depression<br>[0.94] |
| Madagascar   | Diarrhea<br>[1.17]             | Iron<br>[0.91]     | Congenital<br>[1.48]      | Road Inj<br>[0.46]   | Malaria<br>[1.35]    | LRI<br>[0.77]        | PEM<br>[3.96]        | Epilepsy<br>[1.29]   | Depression<br>[1.13] | Conduct<br>[0.93]    |
| Malawi       | HIV<br>[137.69]                | Iron<br>[1.3]      | Malaria<br>[3.5]          | Diarrhea<br>[0.83]   | Road Inj<br>[0.46]   | Epilepsy<br>[1.3]    | Meningitis<br>[0.77] | TB<br>[0.88]         | Conduct<br>[0.93]    | Headaches<br>[0.64]  |
| Mozambique   | HIV<br>[120.15]                | Malaria<br>[4.41]  | TB<br>[1.49]              | Iron<br>[0.91]       | Road Inj<br>[0.58]   | Diarrhea<br>[0.77]   | Epilepsy<br>[1.37]   | LRI<br>[0.65]        | Depression<br>[1.14] | Conduct<br>[0.93]    |

**eFigure 7e. Leading ten causes of DALYs with the ratio of observed DALYs to DALYs expected on the basis of Socio-Demographic Index alone in 2017, 10-19 years, both sexes combined.** The top ten causes contributing to DALYs are listed globally, by socio-demographic quintile, and then by GBD superregion, region, country, and subnationally where modeled. For each cell, the ratio of observed DALYs to DALYs expected on the basis of socio-demographic index (SDI) alone are listed. Abbreviations: DALY=disability-adjusted life year, GBD=Global Burden of Disease.

Values shown in brackets represent the ratio of observed DALYs to predicted DALYs on the basis of Socio-Demographic Index (SDI), rounded to two (2) digits. Color ranges (shown below) were calculated to place a roughly equal number of cells into each bin.

| COLOR KEY:                         |                               | [0.0-0.73]         | [0.73-0.88]         | [0.88-0.95]          | [0.95-1.01]          | [1.01-1.09]          | [1.09-1.26]          | [1.26-1.55]                  | [1.55-2.09]          | 2.09+                |
|------------------------------------|-------------------------------|--------------------|---------------------|----------------------|----------------------|----------------------|----------------------|------------------------------|----------------------|----------------------|
|                                    | 1                             | 2                  | 3                   | 4                    | 5                    | 6                    | 7                    | 8                            | 9                    | 10                   |
| Rwanda                             | HIV<br>[28.63]                | Road Inj<br>[0.71] | Malaria<br>[6.22]   | Depression<br>[1.24] | Diarrhea<br>[0.77]   | Iron<br>[0.6]        | Epilepsy<br>[1.31]   | Conduct<br>[0.93]            | Headaches<br>[0.62]  | Anxiety<br>[1.03]    |
| Somalia                            | Conflict<br>Terror<br>[40.6]  | Road Inj<br>[0.92] | Iron<br>[1.03]      | TB<br>[0.98]         | Diarrhea<br>[0.54]   | Meningitis<br>[0.69] | Epilepsy<br>[1.28]   | LRI<br>[0.63]                | Depression<br>[1.11] | HIV<br>[8.09]        |
| S Sudan                            | Conflict<br>Terror<br>[86.81] | Diarrhea<br>[0.86] | Malaria<br>[0.88]   | Iron<br>[0.9]        | HIV<br>[14.78]       | Oncho<br>[79.0]      | Road Inj<br>[0.56]   | Leish<br>[6.68]              | TB<br>[0.77]         | Meningitis<br>[0.67] |
| Tanzania                           | HIV<br>[58.48]                | Iron<br>[1.34]     | Malaria<br>[7.27]   | Diarrhea<br>[0.87]   | Epilepsy<br>[1.45]   | Depression<br>[1.14] | Conduct<br>[0.92]    | Road Inj<br>[0.36]           | Anxiety<br>[1.02]    | Hemog<br>[1.87]      |
| Uganda                             | HIV<br>[77.69]                | Malaria<br>[9.95]  | Iron<br>[1.11]      | Road Inj<br>[0.56]   | Depression<br>[1.59] | Diarrhea<br>[0.87]   | Epilepsy<br>[1.36]   | Conduct<br>[0.93]            | TB<br>[1.08]         | Headaches<br>[0.61]  |
| Zambia                             | HIV<br>[135.54]               | Malaria<br>[34.5]  | Diarrhea<br>[1.73]  | Road Inj<br>[0.52]   | Epilepsy<br>[1.79]   | Headaches<br>[0.77]  | TB<br>[2.41]         | Meningitis<br>[1.53]         | Conduct<br>[0.92]    | Iron<br>[0.69]       |
| <b>Southern Sub-Saharan Africa</b> | HIV<br>[300.73]               | Violence<br>[2.09] | Road Inj<br>[0.64]  | Headaches<br>[0.75]  | TB<br>[16.43]        | Conduct<br>[0.99]    | Anxiety<br>[0.95]    | Depression<br>[0.98]         | Diarrhea<br>[3.21]   | Neonatal<br>[0.91]   |
| Botswana                           | HIV<br>[81.66]                | Road Inj<br>[0.83] | Iron<br>[2.73]      | Headaches<br>[0.74]  | Neonatal<br>[1.23]   | Diarrhea<br>[4.35]   | Violence<br>[1.54]   | Conduct<br>[0.95]            | Depression<br>[1.07] | Anxiety<br>[0.89]    |
| Lesotho                            | HIV<br>[244.55]               | Violence<br>[3.84] | Road Inj<br>[1.56]  | TB<br>[7.6]          | Diarrhea<br>[2.74]   | Depression<br>[1.76] | LRI<br>[1.48]        | Self Harm<br>[1.45]          | Headaches<br>[0.79]  | Conduct<br>[0.93]    |
| Namibia                            | HIV<br>[225.65]               | Road Inj<br>[0.88] | Violence<br>[2.13]  | Headaches<br>[0.75]  | Diarrhea<br>[3.94]   | TB<br>[11.64]        | Conduct<br>[0.94]    | Iron<br>[1.32]               | Anxiety<br>[0.94]    | Neonatal<br>[1.0]    |
| S Africa                           | HIV<br>[374.34]               | Violence<br>[2.59] | Headaches<br>[0.75] | Road Inj<br>[0.54]   | Conduct<br>[1.02]    | Anxiety<br>[0.97]    | Depression<br>[1.0]  | Neonatal<br>[0.92]           | Congenital<br>[0.87] | Dermatitis<br>[1.27] |
| Swaziland                          | HIV<br>[296.57]               | Road Inj<br>[1.43] | Violence<br>[2.66]  | Diarrhea<br>[4.67]   | TB<br>[10.85]        | Headaches<br>[0.76]  | LRI<br>[1.78]        | Self Harm<br>[1.25]          | Depression<br>[1.14] | Conduct<br>[0.94]    |
| Zimbabwe                           | HIV<br>[110.78]               | TB<br>[4.88]       | Road Inj<br>[0.62]  | Headaches<br>[0.8]   | Diarrhea<br>[1.37]   | Self Harm<br>[1.21]  | LRI<br>[1.05]        | Iron<br>[0.73]               | Violence<br>[1.01]   | Conduct<br>[0.93]    |
| <b>Western Sub-Saharan Africa</b>  | Malaria<br>[31.04]            | Iron<br>[1.53]     | HIV<br>[22.55]      | Headaches<br>[1.02]  | Road Inj<br>[0.48]   | Diarrhea<br>[1.08]   | Conduct<br>[0.93]    | Back Pain<br>[1.12]          | Hemog<br>[2.26]      | Meningitis<br>[1.12] |
| Benin                              | Malaria<br>[8.49]             | Iron<br>[1.34]     | Road Inj<br>[0.81]  | Headaches<br>[1.0]   | HIV<br>[12.11]       | Diarrhea<br>[0.79]   | Conduct<br>[0.93]    | Back Pain<br>[1.11]          | Hemog<br>[1.56]      | Anxiety<br>[0.91]    |
| Burkina Faso                       | Malaria<br>[2.39]             | Iron<br>[1.22]     | Hemog<br>[2.45]     | Headaches<br>[1.1]   | Road Inj<br>[0.44]   | HIV<br>[10.83]       | Diarrhea<br>[0.52]   | Typh +<br>Paratyph<br>[1.04] | Conduct<br>[0.96]    | Meningitis<br>[0.57] |
| Cameroon                           | HIV<br>[56.53]                | Malaria<br>[107.6] | Headaches<br>[0.97] | Road Inj<br>[0.58]   | Diarrhea<br>[1.44]   | Iron<br>[0.8]        | Conduct<br>[0.94]    | Back Pain<br>[1.04]          | Anxiety<br>[0.9]     | LRI<br>[0.76]        |
| Cape Verde                         | Headaches<br>[0.97]           | Violence<br>[1.38] | Neonatal<br>[1.39]  | Iron<br>[1.18]       | Conduct<br>[0.93]    | HIV<br>[17.73]       | Back Pain<br>[0.96]  | Depression<br>[1.0]          | Anxiety<br>[0.9]     | Epilepsy<br>[1.04]   |
| Chad                               | Iron<br>[1.44]                | HIV<br>[17.19]     | Malaria<br>[0.73]   | Diarrhea<br>[0.73]   | Maternal<br>[0.98]   | Road Inj<br>[0.53]   | Headaches<br>[1.12]  | Meningitis<br>[0.66]         | Back Pain<br>[1.38]  | LRI<br>[0.56]        |
| Cote d'Ivoire                      | Malaria<br>[15.45]            | HIV<br>[28.77]     | Iron<br>[1.13]      | Headaches<br>[1.01]  | Road Inj<br>[0.55]   | Diarrhea<br>[0.85]   | Conduct<br>[0.95]    | LRI<br>[0.65]                | Meningitis<br>[0.92] | Violence<br>[0.82]   |
| Gambia                             | Iron<br>[1.86]                | Hemog<br>[6.03]    | Headaches<br>[1.02] | HIV<br>[15.24]       | Road Inj<br>[0.46]   | Meningitis<br>[1.05] | Diarrhea<br>[0.78]   | Vit A<br>[2.15]              | Depression<br>[1.13] | Neonatal<br>[1.59]   |
| Ghana                              | Malaria<br>[394.38]           | HIV<br>[42.39]     | Iron<br>[2.26]      | Road Inj<br>[0.81]   | Headaches<br>[0.96]  | Hemog<br>[4.49]      | Meningitis<br>[2.76] | Conduct<br>[0.93]            | Diarrhea<br>[1.57]   | Anxiety<br>[0.89]    |
| Guinea                             | Malaria<br>[3.66]             | Iron<br>[0.93]     | HIV<br>[13.91]      | Headaches<br>[1.08]  | Road Inj<br>[0.51]   | Diarrhea<br>[0.56]   | Meningitis<br>[0.75] | Maternal<br>[0.88]           | Conduct<br>[0.95]    | LRI<br>[0.56]        |
| Guinea-Bissau                      | HIV<br>[45.59]                | Hemog<br>[5.44]    | Road Inj<br>[0.92]  | Iron<br>[1.29]       | Diarrhea<br>[1.06]   | Headaches<br>[1.06]  | Meningitis<br>[0.98] | LRI<br>[0.67]                | Conduct<br>[0.94]    | TB<br>[0.81]         |
| Liberia                            | Oncho<br>[194.57]             | Malaria<br>[2.82]  | HIV<br>[20.29]      | Iron<br>[0.93]       | Diarrhea<br>[0.85]   | Headaches<br>[1.06]  | Hemog<br>[2.16]      | Road Inj<br>[0.35]           | Conduct<br>[0.94]    | Back Pain<br>[1.09]  |
| Mali                               | Iron<br>[1.62]                | Malaria<br>[1.26]  | Diarrhea<br>[0.68]  | Headaches<br>[1.12]  | HIV<br>[10.87]       | Meningitis<br>[0.72] | Road Inj<br>[0.41]   | Vit A<br>[1.36]              | Maternal<br>[0.6]    | Hemog<br>[1.26]      |
| Mauritania                         | Road Inj<br>[0.85]            | Iron<br>[1.19]     | Headaches<br>[0.98] | Diarrhea<br>[1.39]   | Conduct<br>[0.93]    | Neonatal<br>[1.22]   | Back Pain<br>[0.96]  | Anxiety<br>[0.91]            | Depression<br>[0.74] | Meningitis<br>[0.99] |
| Niger                              | Malaria<br>[0.77]             | Iron<br>[0.94]     | Headaches<br>[1.17] | Diarrhea<br>[0.47]   | Maternal<br>[0.46]   | Road Inj<br>[0.34]   | Conduct<br>[0.97]    | Meningitis<br>[0.49]         | Back Pain<br>[1.24]  | Anxiety<br>[0.95]    |
| Nigeria                            | Malaria<br>[107.06]           | Iron<br>[1.99]     | HIV<br>[26.56]      | Headaches<br>[1.01]  | Back Pain<br>[1.24]  | Conduct<br>[0.92]    | Diarrhea<br>[1.35]   | Depression<br>[1.03]         | Road Inj<br>[0.38]   | Hemog<br>[2.5]       |

**eFigure 7e. Leading ten causes of DALYs with the ratio of observed DALYs to DALYs expected on the basis of Socio-Demographic Index alone in 2017, 10-19 years, both sexes combined.** The top ten causes contributing to DALYs are listed globally, by socio-demographic quintile, and then by GBD superregion, region, country, and subnationally where modeled. For each cell, the ratio of observed DALYs to DALYs expected on the basis of socio-demographic index (SDI) alone are listed. Abbreviations: DALY=disability-adjusted life year, GBD=Global Burden of Disease.

*Values shown in brackets represent the ratio of observed DALYs to predicted DALYs on the basis of Socio-Demographic Index (SDI), rounded to two (2) digits. Color ranges (shown below) were calculated to place a roughly equal number of cells into each bin.*

| COLOR KEY:        |                     | [0.0-0.73]          | [0.73-0.88]        | [0.88-0.95]         | [0.95-1.01]        | [1.01-1.09]          | [1.09-1.26]         | [1.26-1.55]       | [1.55-2.09]          | 2.09+                |
|-------------------|---------------------|---------------------|--------------------|---------------------|--------------------|----------------------|---------------------|-------------------|----------------------|----------------------|
|                   | 1                   | 2                   | 3                  | 4                   | 5                  | 6                    | 7                   | 8                 | 9                    | 10                   |
| Sao Tome Principe | Headaches<br>[0.97] | LRI<br>[1.11]       | Iron<br>[0.91]     | Road Inj<br>[0.47]  | Conduct<br>[0.94]  | Neonatal<br>[1.23]   | Back Pain<br>[0.92] | Anxiety<br>[0.9]  | Depression<br>[0.85] | Congenital<br>[0.88] |
| Senegal           | Iron<br>[1.62]      | Headaches<br>[1.04] | Diarrhea<br>[0.89] | Hemog<br>[2.3]      | Road Inj<br>[0.42] | Meningitis<br>[0.93] | Conduct<br>[0.95]   | Neonatal<br>[1.5] | HIV<br>[7.65]        | Anxiety<br>[0.91]    |
| Sierra Leone      | Malaria<br>[8.59]   | Iron<br>[0.97]      | Diarrhea<br>[0.89] | Headaches<br>[1.07] | Road Inj<br>[0.51] | Maternal<br>[1.31]   | Meningitis<br>[0.9] | Conduct<br>[0.93] | LRI<br>[0.62]        | HIV<br>[8.28]        |
| Togo              | HIV<br>[48.7]       | Malaria<br>[26.86]  | Road Inj<br>[0.65] | Iron<br>[1.04]      | Hemog<br>[3.4]     | Headaches<br>[1.0]   | Diarrhea<br>[0.98]  | Conduct<br>[0.94] | Back Pain<br>[1.04]  | Anxiety<br>[0.9]     |

Appendix Figure 8: Co-evolution of YLL to YLD ratios and SDI for GBD regions and Level 1 causes, 1990 to 2017, both sexes combined.

(a) All causes

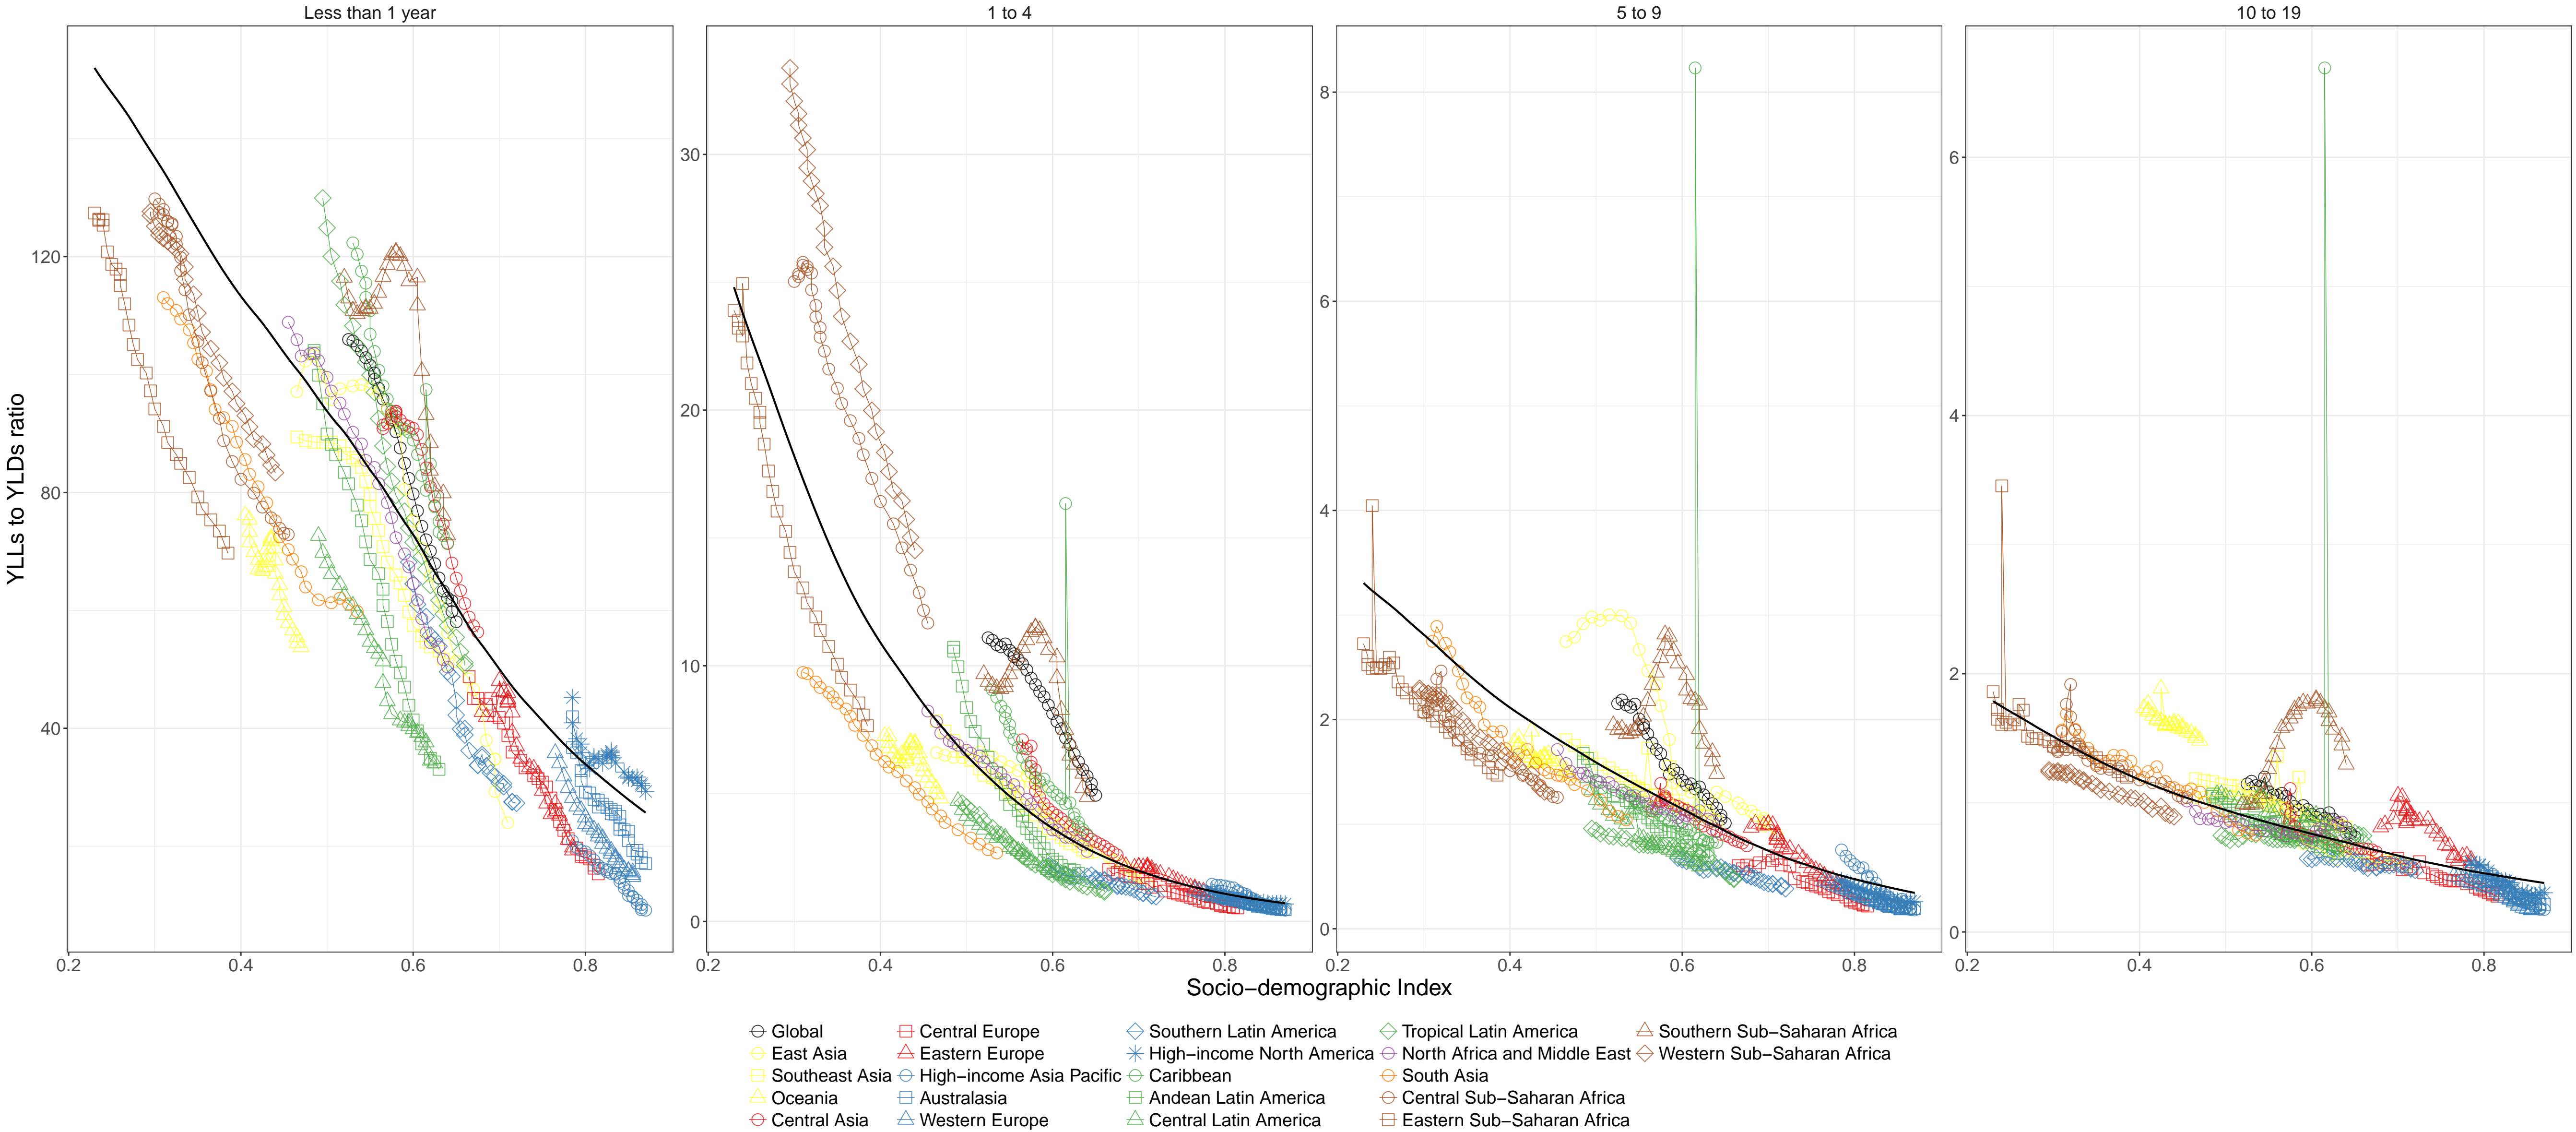

The coevolution of YLL to YLD ratio is plotted for each GBD region through time. In panel a) changes across all causes are plotted; in panel b) changes in the YLL to YLD ratio for maternal, neonatal, and nutritional (CMNN) conditions are plotted; in panel c), changes in the YLL to YLD ratio for non-communicable diseases (NCDs) is plotted and in panel d) changes in the YLL to YLD ratio for injuries is plotted. Within each panel, trends for children less than 1 are plotted in left sub-panel, between 1 and 4 in the second sub-panel, between 5 and 9 in the third sub-panel, and between 10 and 19 in the right sub-panel. Abbreviations: YLD=year of life lived with disability, YLL=year of life lost, GBD=Global Burden of Disease.

Appendix Figure 8: Co-evolution of YLL to YLD ratios and SDI for GBD regions and Level 1 causes, 1990 to 2017, both sexes combined.

(b) Communicable, maternal, neonatal, and nutritional diseases

© 2019 GBD 2017 Child and Adolescent Health Collaborators. JAMA Pediatrics.

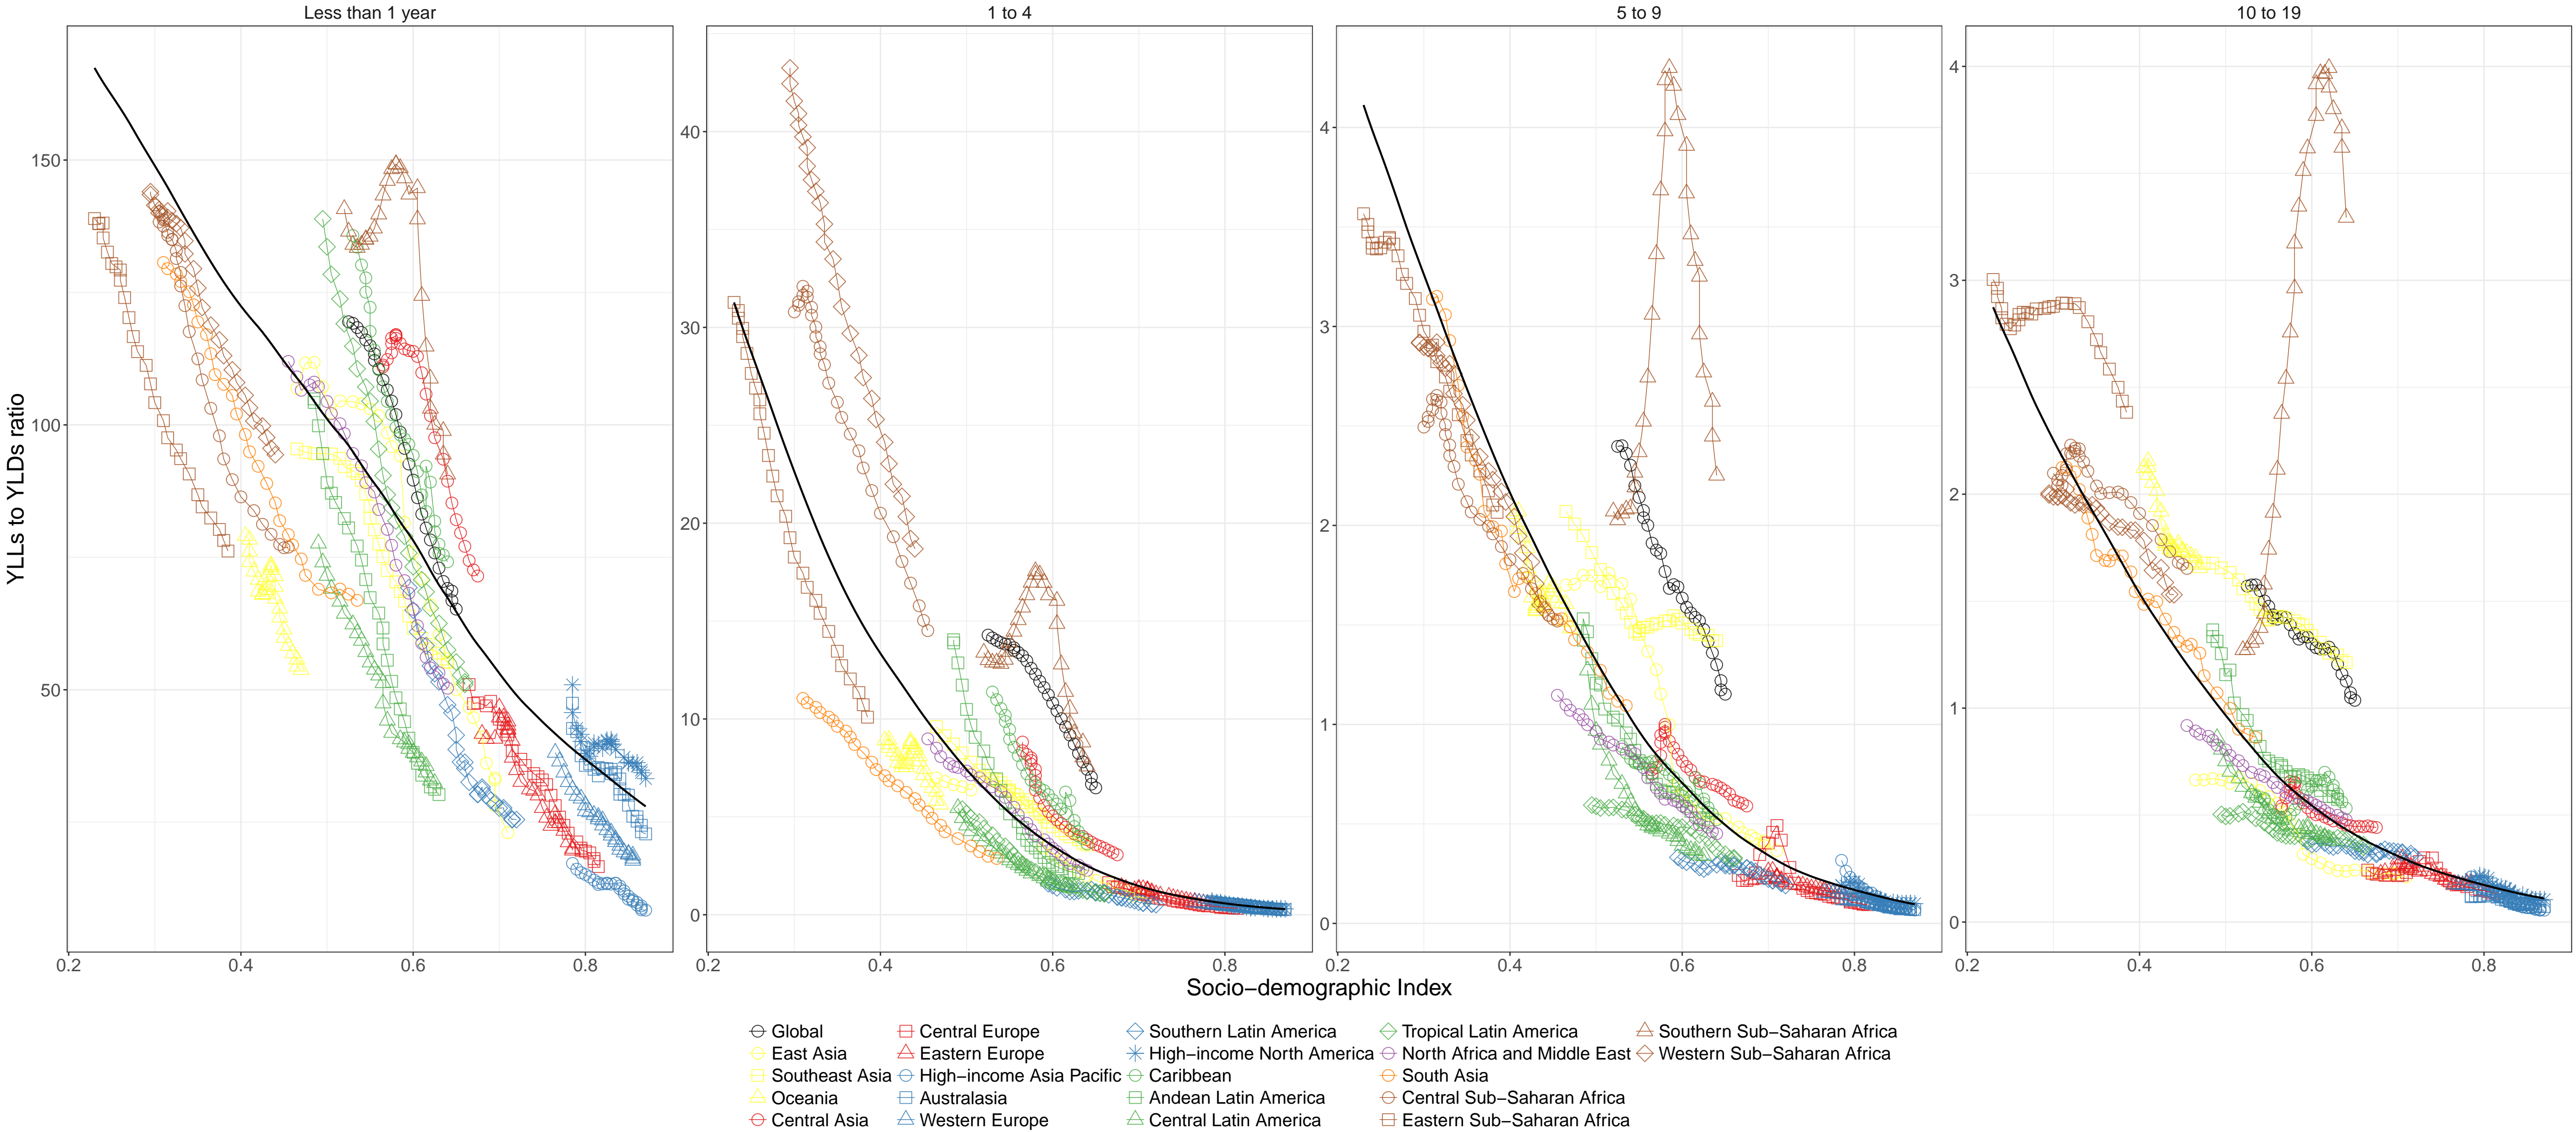

The coevolution of YLL to YLD ratio is plotted for each GBD region through time. In panel a) changes across all causes are plotted; in panel b) changes in the YLL to YLD ratio for maternal, neonatal, and nutritional (CMNN) conditions are plotted; in panel c), changes in the YLL to YLD ratio for non-communicable diseases (NCDs) is plotted and in panel d) changes in the YLL to YLD ratio for injuries is plotted. Within each panel, trends for children less than 1 are plotted in left sub-panel, between 1 and 4 in the second sub-panel, between 5 and 9 in the third sub-panel, and between 10 and 19 in the right sub-panel. Abbreviations: YLD=year of life lived with disability, YLL=year of life lost, GBD=Global Burden of Disease.

Appendix Figure 8: Co-evolution of YLL to YLD ratios and SDI for GBD regions and Level 1 causes, 1990 to 2017, both sexes combined.

(c) Non-communicable diseases

© 2019 GBD 2017 Child and Adolescent Health Collaborators. JAMA Pediatrics.

155

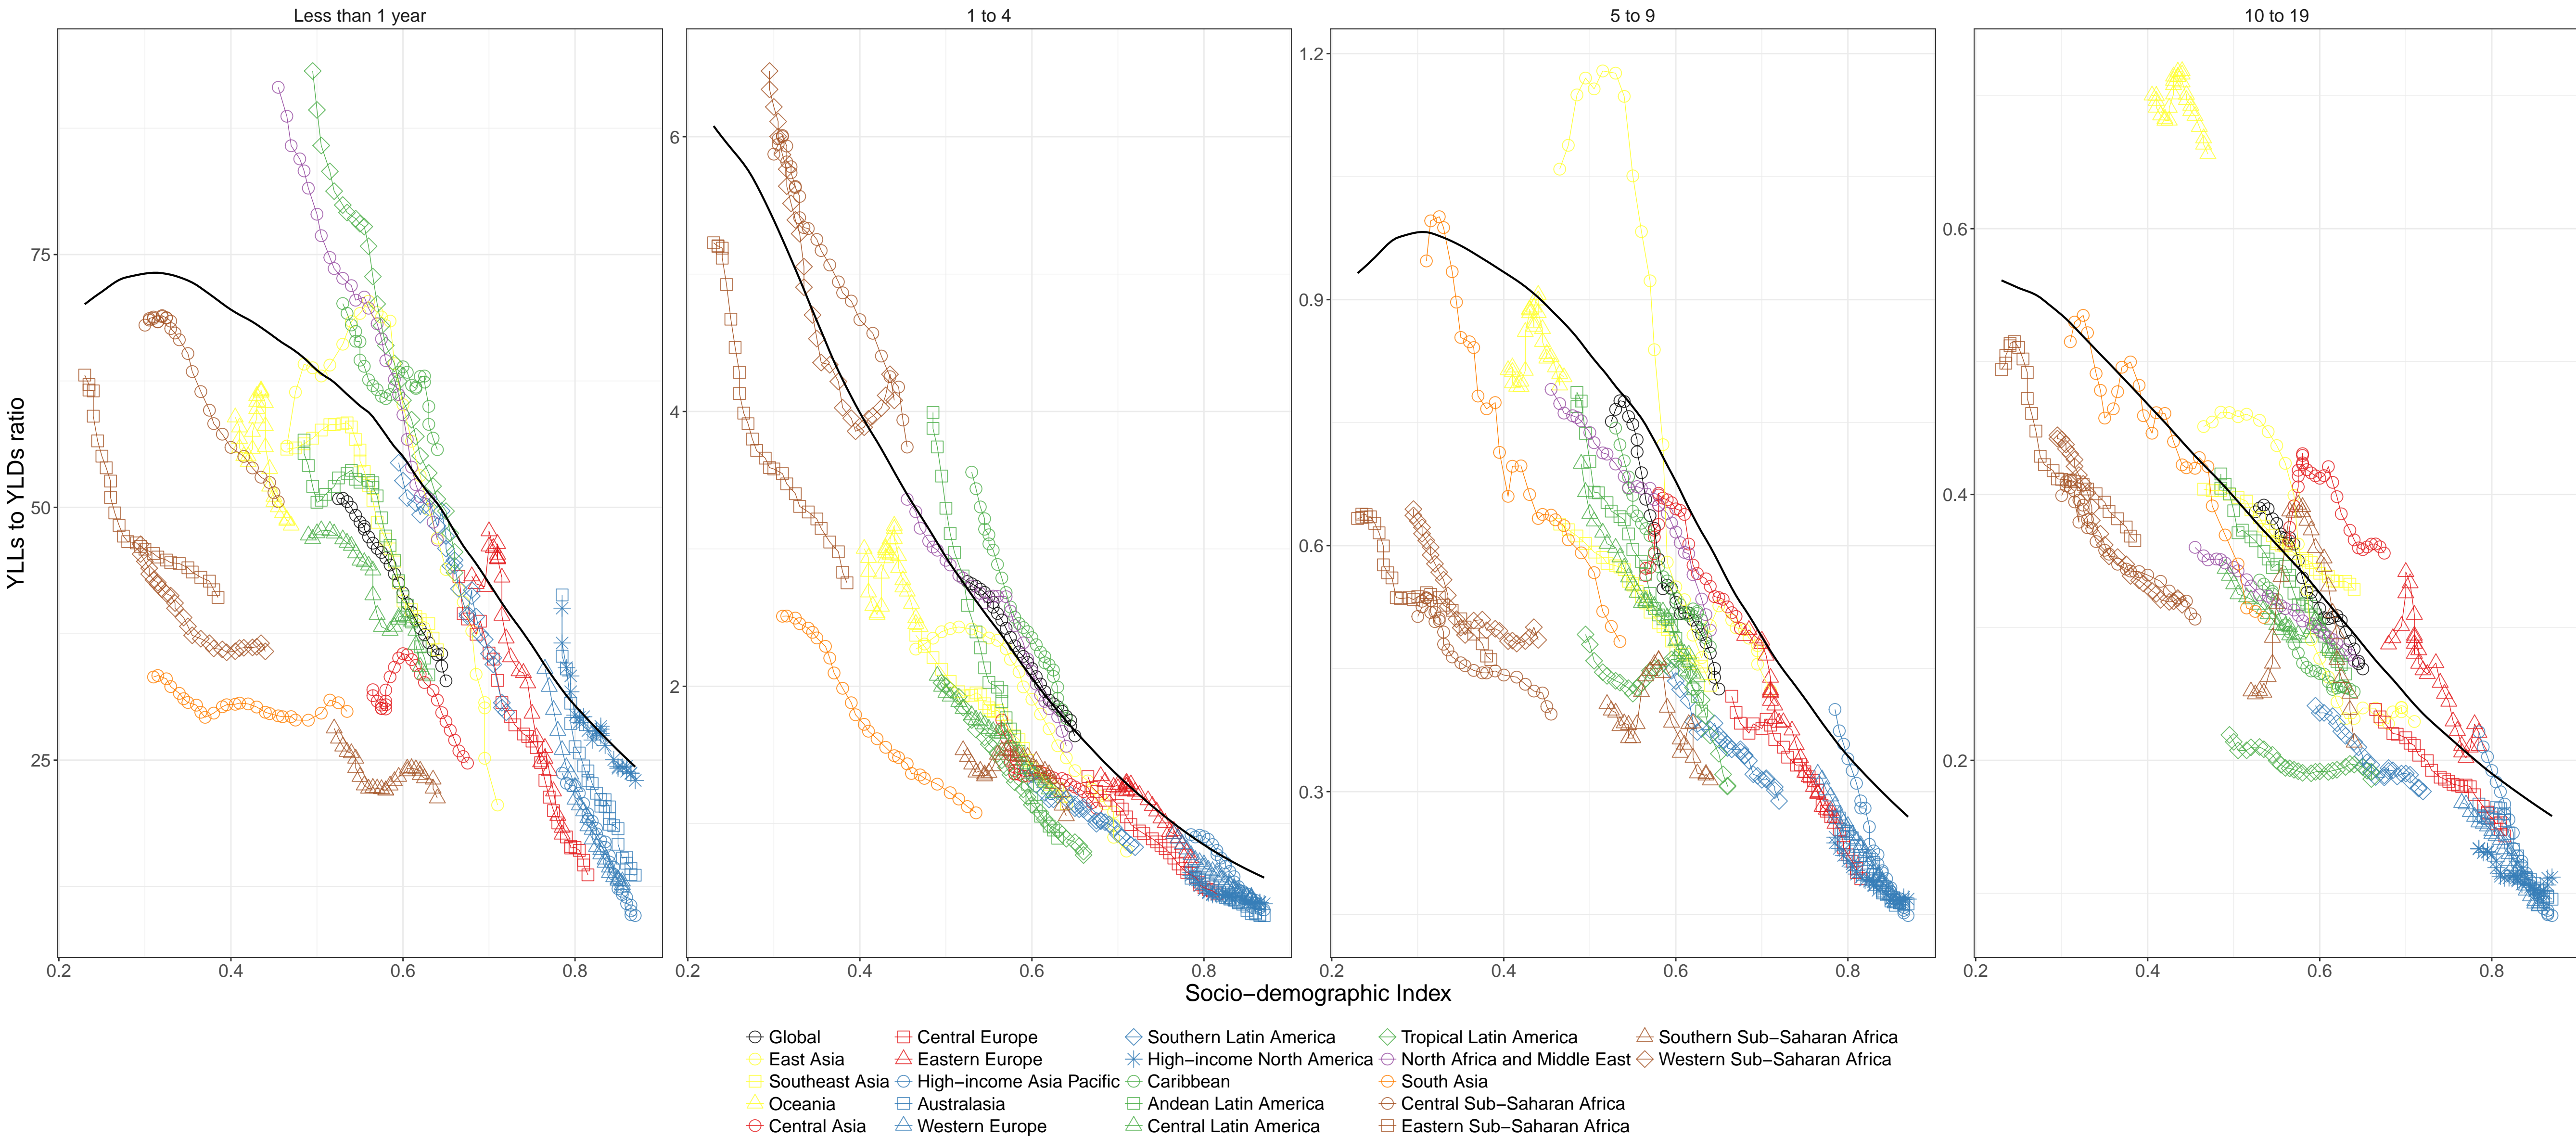

The coevolution of YLL to YLD ratio is plotted for each GBD region through time. In panel a) changes across all causes are plotted; in panel b) changes in the YLL to YLD ratio for maternal, neonatal, and nutritional (CMNN) conditions are plotted; in panel c), changes in the YLL to YLD ratio for non-communicable diseases (NCDs) is plotted and in panel d) changes in the YLL to YLD ratio for injuries is plotted. Within each panel, trends for children less than 1 are plotted in left sub-panel, between 1 and 4 in the second sub-panel, between 5 and 9 in the third sub-panel, and between 10 and 19 in the right sub-panel. Abbreviations: YLD=year of life lived with disability, YLL=year of life lost, GBD=Global Burden of Disease.

**Appendix Figure 8: Co-evolution of YLL to YLD ratios and SDI for GBD regions and Level 1 causes, 1990 to 2017, both sexes combined.**

(d) Injuries

© 2019 GBD 2017 Child and Adolescent Health Collaborators. JAMA Pediatrics.

156

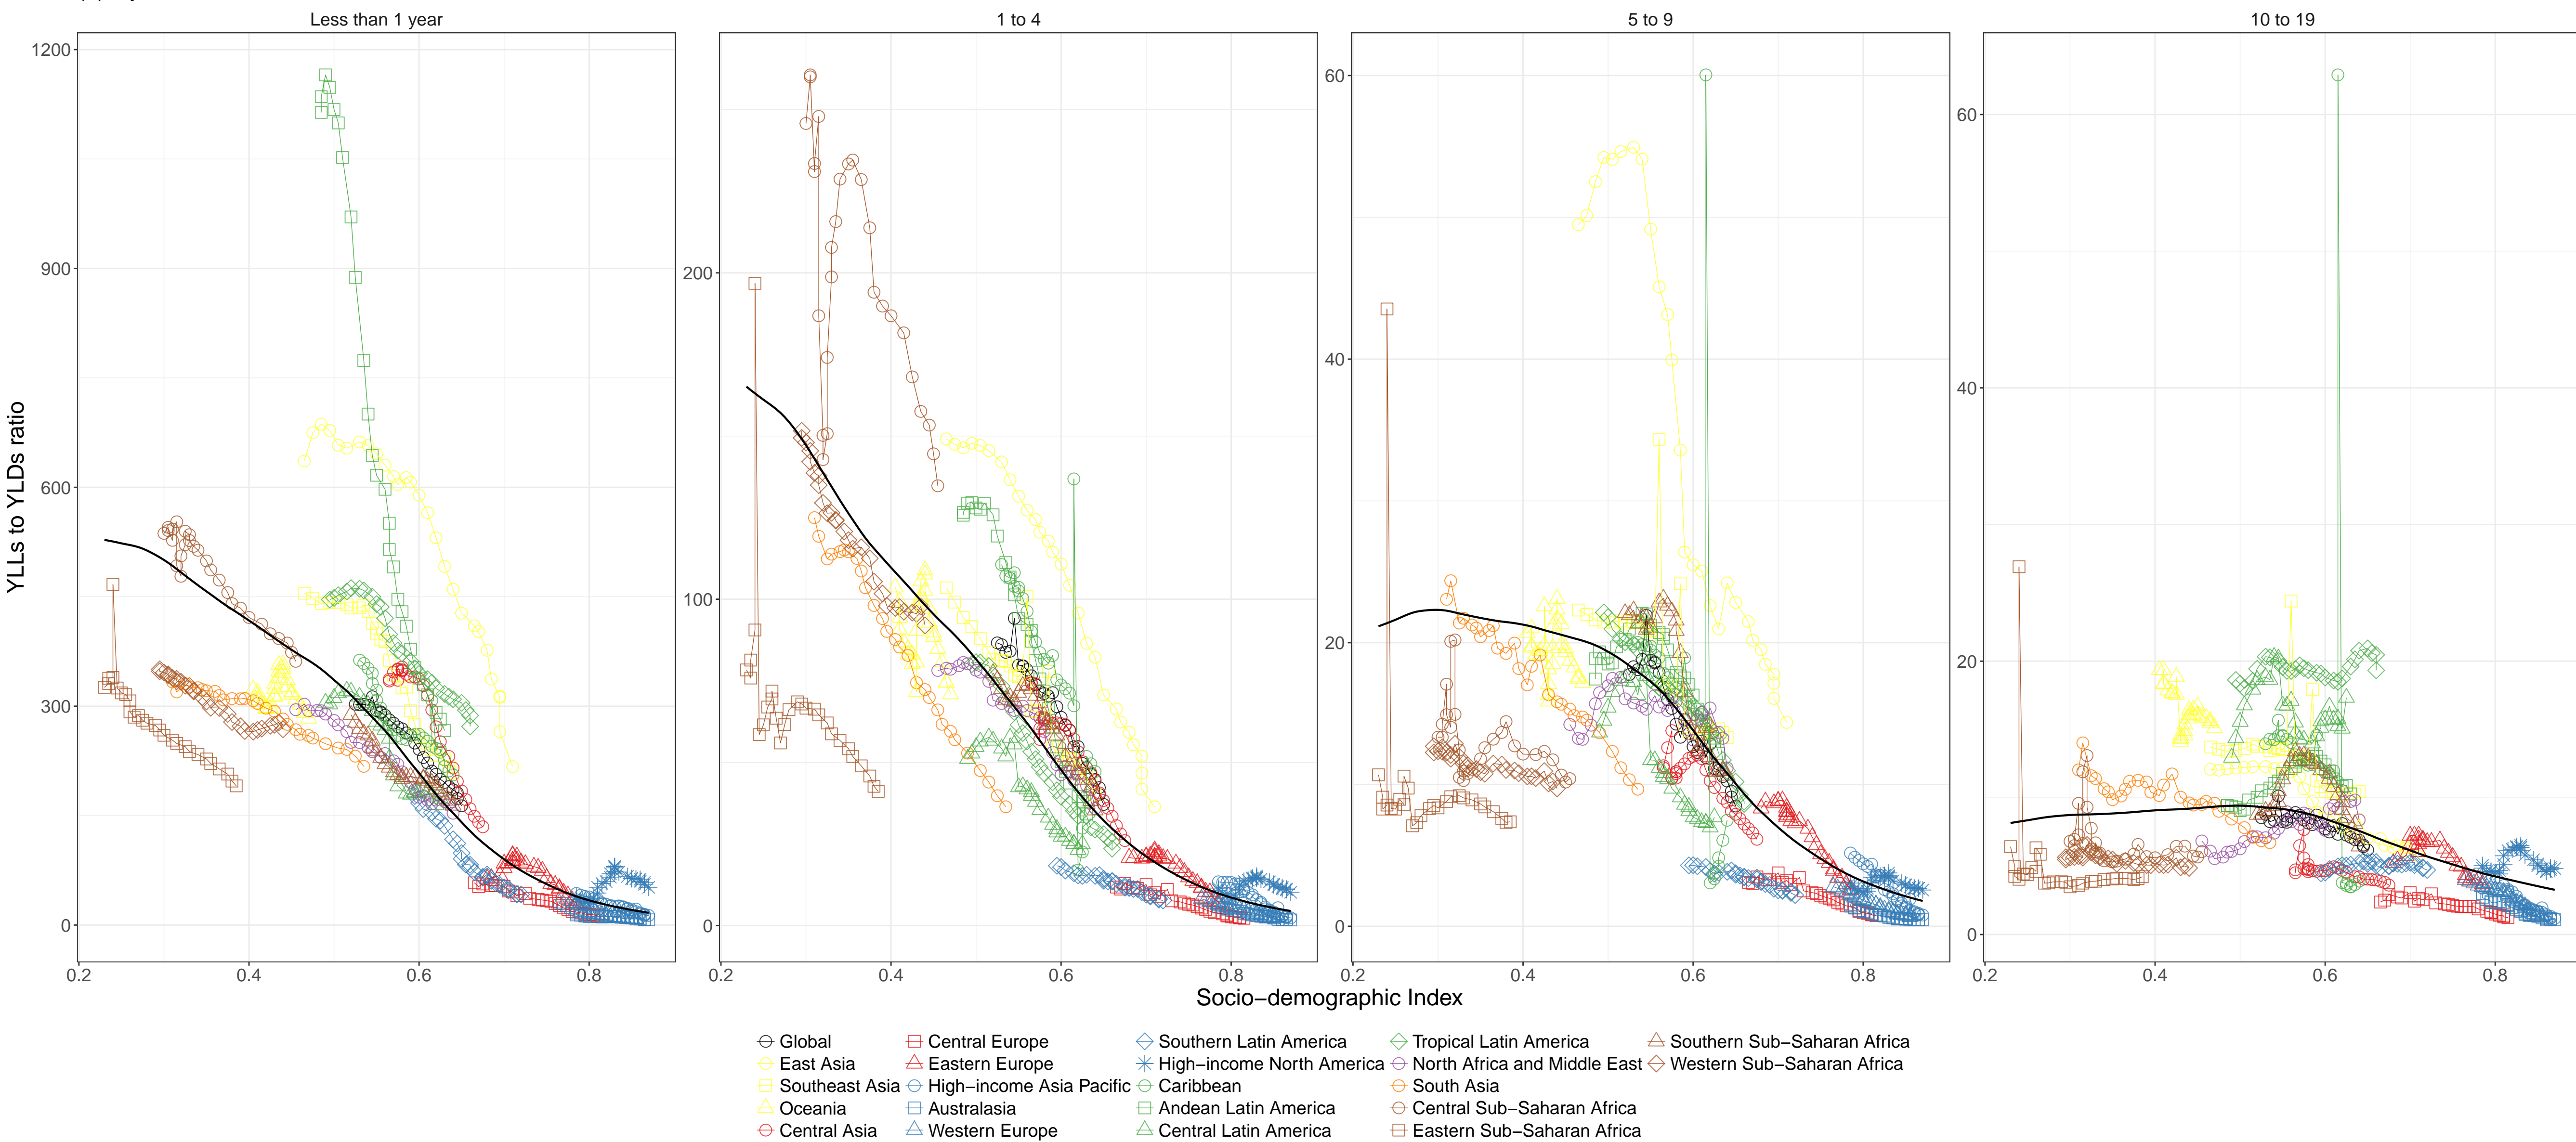

The coevolution of YLL to YLD ratio is plotted for each GBD region through time. In panel a) changes across all causes are plotted; in panel b) changes in the YLL to YLD ratio for maternal, neonatal, and nutritional (CMNN) conditions are plotted; in panel c), changes in the YLL to YLD ratio for non-communicable diseases (NCDs) is plotted and in panel d) changes in the YLL to YLD ratio for injuries is plotted. Within each panel, trends for children less than 1 are plotted in left sub-panel, between 1 and 4 in the second sub-panel, between 5 and 9 in the third sub-panel, and between 10 and 19 in the right sub-panel. Abbreviations: YLD=year of life lived with disability, YLL=year of life lost, GBD=Global Burden of Disease.

**eFigure 9a. Leading ten causes of YLDs with the ratio of observed YLDs to YLDs expected on the basis of Socio-Demographic Index alone in 2017, <20 years, both sexes combined.** The top ten causes contributing to YLDs are listed globally, by socio-demographic quintile, and then by GBD superregion, region, country, and subnationally where modeled. For each cell, the ratio of observed YLDs to YLDs expected on the basis of socio-demographic index (SDI) alone are listed. Abbreviations: YLD=year of life lived with disability, GBD=Global Burden of Disease.

Values shown in brackets represent the ratio of observed YLDs to predicted YLDs on the basis of Socio-Demographic Index (SDI), rounded to two (2) digits. Color ranges (shown below) were calculated to place a roughly equal number of cells into each bin.

| COLOR KEY:                                       |                    | [0.0-0.78]          | [0.78-0.88]         | [0.88-0.94]         | [0.94-1.0]           | [1.0-1.06]           | [1.06-1.18]            | [1.18-1.38]          | [1.38-1.66]            | 1.66+                  |
|--------------------------------------------------|--------------------|---------------------|---------------------|---------------------|----------------------|----------------------|------------------------|----------------------|------------------------|------------------------|
|                                                  | 1                  | 2                   | 3                   | 4                   | 5                    | 6                    | 7                      | 8                    | 9                      | 10                     |
| Global                                           | Iron<br>[2.08]     | Neonatal<br>[1.13]  | Headaches<br>[0.82] | Vit A<br>[1.88]     | Conduct<br>[0.87]    | Dermatitis<br>[0.79] | Anxiety<br>[0.86]      | Congenital<br>[0.99] | Back Pain<br>[0.79]    | Depression<br>[0.87]   |
| Low SDI                                          | Iron<br>[1.2]      | Vit A<br>[1.01]     | Neonatal<br>[1.34]  | Headaches<br>[0.96] | Dermatitis<br>[0.85] | Conduct<br>[0.94]    | Diarrhea<br>[0.94]     | Congenital<br>[1.04] | Anxiety<br>[0.98]      | Depression<br>[0.96]   |
| Low-middle SDI                                   | Iron<br>[1.64]     | Neonatal<br>[1.16]  | Vit A<br>[1.29]     | Headaches<br>[0.95] | Conduct<br>[0.89]    | Dermatitis<br>[0.79] | Anxiety<br>[0.92]      | Diarrhea<br>[1.13]   | Congenital<br>[1.05]   | Back Pain<br>[0.92]    |
| Middle SDI                                       | Neonatal<br>[1.2]  | Headaches<br>[0.81] | Iron<br>[1.12]      | Conduct<br>[0.87]   | Dermatitis<br>[0.77] | Anxiety<br>[0.77]    | Vit A<br>[1.16]        | Asthma<br>[0.79]     | Back Pain<br>[0.76]    | Congenital<br>[0.91]   |
| High-middle SDI                                  | Neonatal<br>[1.34] | Headaches<br>[0.75] | Anxiety<br>[0.72]   | Conduct<br>[0.89]   | Back Pain<br>[0.77]  | Dermatitis<br>[0.6]  | Depression<br>[0.82]   | Asthma<br>[0.83]     | Congenital<br>[0.92]   | Iron<br>[2.91]         |
| High SDI                                         | Neonatal<br>[0.88] | Headaches<br>[0.92] | Dermatitis<br>[1.2] | Anxiety<br>[1.16]   | Depression<br>[1.31] | Conduct<br>[0.98]    | Back Pain<br>[1.05]    | Asthma<br>[0.96]     | Drugs<br>[3.12]        | Congenital<br>[0.89]   |
| Central Europe, Eastern Europe, and Central Asia | Neonatal<br>[1.38] | Headaches<br>[0.82] | Iron<br>[2.41]      | Conduct<br>[0.94]   | Falls<br>[1.7]       | Congenital<br>[1.08] | Dermatitis<br>[0.61]   | Back Pain<br>[0.73]  | Anxiety<br>[0.56]      | Upper Digest<br>[3.75] |
| Central Asia                                     | Iron<br>[2.31]     | Neonatal<br>[0.98]  | Headaches<br>[0.78] | Conduct<br>[0.88]   | Vit A<br>[1.55]      | Congenital<br>[1.07] | Epilepsy<br>[1.3]      | Dermatitis<br>[0.54] | Back Pain<br>[0.66]    | Depression<br>[0.69]   |
| Armenia                                          | Iron<br>[3.01]     | Neonatal<br>[0.99]  | Headaches<br>[0.79] | Conduct<br>[0.92]   | Congenital<br>[1.06] | Back Pain<br>[0.68]  | Diarrhea<br>[1.37]     | Dermatitis<br>[0.53] | Anxiety<br>[0.53]      | Epilepsy<br>[1.22]     |
| Azerbaijan                                       | Neonatal<br>[0.96] | Headaches<br>[0.79] | Iron<br>[1.56]      | Conduct<br>[0.91]   | Congenital<br>[1.04] | Back Pain<br>[0.66]  | Dermatitis<br>[0.53]   | Epilepsy<br>[1.34]   | Diarrhea<br>[1.25]     | Anxiety<br>[0.53]      |
| Georgia                                          | Neonatal<br>[0.99] | Headaches<br>[0.79] | Conduct<br>[0.91]   | Iron<br>[1.1]       | Congenital<br>[1.08] | Epilepsy<br>[1.26]   | Anxiety<br>[0.53]      | Diarrhea<br>[1.23]   | Dermatitis<br>[0.49]   | Back Pain<br>[0.59]    |
| Kazakhstan                                       | Neonatal<br>[1.07] | Vit A<br>[3.21]     | Headaches<br>[0.71] | Iron<br>[1.74]      | Conduct<br>[0.84]    | Congenital<br>[1.1]  | Depression<br>[0.73]   | Back Pain<br>[0.62]  | Epilepsy<br>[1.43]     | Dermatitis<br>[0.5]    |
| Kyrgyzstan                                       | Iron<br>[1.88]     | Neonatal<br>[1.03]  | Headaches<br>[0.79] | Vit A<br>[1.14]     | Conduct<br>[0.87]    | Congenital<br>[1.09] | Hernia<br>[6.09]       | Dermatitis<br>[0.58] | Back Pain<br>[0.69]    | Epilepsy<br>[1.05]     |
| Mongolia                                         | Neonatal<br>[1.03] | Vit A<br>[2.22]     | Iron<br>[1.23]      | Headaches<br>[0.72] | Conduct<br>[0.82]    | Congenital<br>[1.1]  | Dermatitis<br>[0.56]   | Diarrhea<br>[1.19]   | Depression<br>[0.78]   | Epilepsy<br>[1.25]     |
| Tajikistan                                       | Iron<br>[0.9]      | Neonatal<br>[1.05]  | Vit A<br>[0.98]     | Headaches<br>[0.86] | Conduct<br>[0.91]    | Congenital<br>[1.1]  | Diarrhea<br>[0.99]     | Epilepsy<br>[1.09]   | Dermatitis<br>[0.58]   | Back Pain<br>[0.75]    |
| Turkmenistan                                     | Neonatal<br>[0.9]  | Iron<br>[1.56]      | Headaches<br>[0.75] | Conduct<br>[0.86]   | Congenital<br>[1.07] | Dermatitis<br>[0.54] | Epilepsy<br>[1.31]     | Vit A<br>[1.14]      | Back Pain<br>[0.61]    | Anxiety<br>[0.51]      |
| Uzbekistan                                       | Iron<br>[2.64]     | Neonatal<br>[0.93]  | Headaches<br>[0.83] | Conduct<br>[0.91]   | Congenital<br>[1.05] | Vit A<br>[1.04]      | Epilepsy<br>[1.25]     | Back Pain<br>[0.71]  | Dermatitis<br>[0.56]   | Depression<br>[0.75]   |
| Central Europe                                   | Neonatal<br>[1.42] | Headaches<br>[0.85] | Falls<br>[2.16]     | Conduct<br>[0.99]   | Back Pain<br>[0.89]  | Congenital<br>[1.22] | Anxiety<br>[0.67]      | Dermatitis<br>[0.65] | Diarrhea<br>[2.26]     | Upper Digest<br>[3.99] |
| Albania                                          | Neonatal<br>[1.18] | Headaches<br>[0.95] | Falls<br>[3.38]     | Back Pain<br>[1.19] | Conduct<br>[1.0]     | Congenital<br>[1.17] | Anxiety<br>[0.82]      | Vit A<br>[1.31]      | Iron<br>[0.78]         | Upper Digest<br>[3.38] |
| Bosnia                                           | Neonatal<br>[1.34] | Headaches<br>[0.93] | Falls<br>[3.21]     | Conduct<br>[1.0]    | Back Pain<br>[0.96]  | Anxiety<br>[0.79]    | Congenital<br>[1.17]   | Vit A<br>[1.61]      | Dermatitis<br>[0.59]   | Iron<br>[0.85]         |
| Bulgaria                                         | Neonatal<br>[1.26] | Headaches<br>[0.83] | Falls<br>[2.22]     | Conduct<br>[0.97]   | Congenital<br>[1.26] | Anxiety<br>[0.71]    | Back Pain<br>[0.83]    | Diarrhea<br>[1.97]   | Dermatitis<br>[0.53]   | Vit A<br>[2.25]        |
| Croatia                                          | Neonatal<br>[1.53] | Headaches<br>[0.88] | Conduct<br>[1.01]   | Back Pain<br>[0.9]  | Anxiety<br>[0.68]    | Congenital<br>[1.2]  | Falls<br>[1.35]        | Dermatitis<br>[0.56] | Diarrhea<br>[1.95]     | Depression<br>[0.7]    |
| Czech                                            | Neonatal<br>[0.96] | Falls<br>[2.33]     | Headaches<br>[0.79] | Back Pain<br>[0.93] | Conduct<br>[0.96]    | Dermatitis<br>[0.66] | Congenital<br>[1.17]   | Anxiety<br>[0.61]    | Diarrhea<br>[2.68]     | Depression<br>[0.59]   |
| Hungary                                          | Neonatal<br>[1.36] | Headaches<br>[0.87] | Falls<br>[2.24]     | Diarrhea<br>[3.35]  | Back Pain<br>[1.01]  | Conduct<br>[1.01]    | Dermatitis<br>[0.76]   | Congenital<br>[1.25] | Anxiety<br>[0.68]      | Depression<br>[0.62]   |
| Macedonia                                        | Neonatal<br>[1.34] | Headaches<br>[0.88] | Falls<br>[2.55]     | Conduct<br>[0.97]   | Iron<br>[1.81]       | Congenital<br>[1.16] | Anxiety<br>[0.72]      | Vit A<br>[2.35]      | Back Pain<br>[0.7]     | Dermatitis<br>[0.54]   |
| Montenegro                                       | Neonatal<br>[1.32] | Headaches<br>[0.89] | Falls<br>[2.36]     | Conduct<br>[1.01]   | Back Pain<br>[0.97]  | Congenital<br>[1.18] | Anxiety<br>[0.71]      | Dermatitis<br>[0.57] | Depression<br>[0.65]   | Vit A<br>[2.4]         |
| Poland                                           | Neonatal<br>[1.59] | Headaches<br>[0.84] | Falls<br>[1.96]     | Conduct<br>[0.98]   | Dermatitis<br>[0.75] | Congenital<br>[1.23] | Anxiety<br>[0.64]      | Back Pain<br>[0.72]  | Upper Digest<br>[4.72] | Asthma<br>[0.78]       |
| Romania                                          | Neonatal<br>[1.44] | Iron<br>[4.07]      | Headaches<br>[0.87] | Falls<br>[2.31]     | Back Pain<br>[1.08]  | Conduct<br>[1.0]     | Upper Digest<br>[5.78] | Diarrhea<br>[2.51]   | Congenital<br>[1.21]   | Vit A<br>[3.22]        |
| Serbia                                           | Neonatal<br>[1.73] | Headaches<br>[0.88] | Falls<br>[2.71]     | Conduct<br>[1.0]    | Back Pain<br>[1.01]  | Congenital<br>[1.26] | Anxiety<br>[0.73]      | Dermatitis<br>[0.58] | Vit A<br>[1.71]        | Diarrhea<br>[1.39]     |
| Slovakia                                         | Neonatal<br>[1.06] | Headaches<br>[0.84] | Falls<br>[1.99]     | Back Pain<br>[0.97] | Conduct<br>[0.98]    | Congenital<br>[1.3]  | Diarrhea<br>[2.83]     | Anxiety<br>[0.65]    | Dermatitis<br>[0.65]   | Upper Digest<br>[4.28] |
| Slovenia                                         | Neonatal<br>[1.13] | Falls<br>[2.23]     | Headaches<br>[0.81] | Back Pain<br>[0.98] | Conduct<br>[0.97]    | Congenital<br>[1.28] | Anxiety<br>[0.61]      | Diarrhea<br>[2.71]   | Dermatitis<br>[0.57]   | Asthma<br>[0.71]       |

**eFigure 9a. Leading ten causes of YLDs with the ratio of observed YLDs to YLDs expected on the basis of Socio-Demographic Index alone in 2017, <20 years, both sexes combined.**  
The top ten causes contributing to YLDs are listed globally, by socio-demographic quintile, and then by GBD superregion, region, country, and subnationally where modeled. For each cell, the ratio of observed YLDs to YLDs expected on the basis of socio-demographic index (SDI) alone are listed. Abbreviations: YLD=year of life lived with disability, GBD=Global Burden of Disease.

Values shown in brackets represent the ratio of observed YLDs to predicted YLDs on the basis of Socio-Demographic Index (SDI), rounded to two (2) digits. Color ranges (shown below) were calculated to place a roughly equal number of cells into each bin.

| COLOR KEY:                      |                      | [0.0-0.78]           | [0.78-0.88]            | [0.88-0.94]            | [0.94-1.0]             | [1.0-1.06]           | [1.06-1.18]          | [1.18-1.38]          | [1.38-1.66]          | 1.66+                |
|---------------------------------|----------------------|----------------------|------------------------|------------------------|------------------------|----------------------|----------------------|----------------------|----------------------|----------------------|
|                                 | 1                    | 2                    | 3                      | 4                      | 5                      | 6                    | 7                    | 8                    | 9                    | 10                   |
| <b>Eastern Europe</b>           | Neonatal<br>[1.66]   | Headaches<br>[0.84]  | Conduct<br>[0.96]      | Upper Digest<br>[5.86] | Falls<br>[1.67]        | Dermatitis<br>[0.65] | Iron<br>[1.95]       | Congenital<br>[1.03] | Back Pain<br>[0.71]  | Anxiety<br>[0.54]    |
| Belarus                         | Neonatal<br>[1.62]   | Headaches<br>[0.86]  | Conduct<br>[0.91]      | Upper Digest<br>[5.8]  | Dermatitis<br>[0.73]   | Falls<br>[1.7]       | Back Pain<br>[0.75]  | Congenital<br>[1.01] | Anxiety<br>[0.56]    | Depression<br>[0.72] |
| Estonia                         | Neonatal<br>[1.72]   | Headaches<br>[0.88]  | Dermatitis<br>[0.94]   | Conduct<br>[0.97]      | Upper Digest<br>[6.43] | Falls<br>[1.35]      | Congenital<br>[1.06] | Back Pain<br>[0.67]  | Diarrhea<br>[2.58]   | Anxiety<br>[0.53]    |
| Latvia                          | Neonatal<br>[1.55]   | Headaches<br>[0.88]  | Upper Digest<br>[7.25] | Conduct<br>[0.95]      | Falls<br>[1.49]        | Dermatitis<br>[0.66] | Back Pain<br>[0.76]  | Diarrhea<br>[2.38]   | Congenital<br>[0.97] | Anxiety<br>[0.54]    |
| Lithuania                       | Neonatal<br>[1.78]   | Headaches<br>[1.01]  | Conduct<br>[0.98]      | Upper Digest<br>[6.86] | Falls<br>[1.47]        | Back Pain<br>[0.77]  | Congenital<br>[1.14] | Diarrhea<br>[2.62]   | Depression<br>[0.83] | Anxiety<br>[0.56]    |
| Moldova                         | Neonatal<br>[1.68]   | Headaches<br>[0.97]  | Iron<br>[1.4]          | Upper Digest<br>[7.47] | Conduct<br>[0.97]      | Falls<br>[2.67]      | Dermatitis<br>[0.77] | Back Pain<br>[0.9]   | Congenital<br>[0.99] | Anxiety<br>[0.68]    |
| Russian Federation              | Neonatal<br>[1.66]   | Headaches<br>[0.82]  | Conduct<br>[0.96]      | Upper Digest<br>[5.74] | Falls<br>[1.65]        | Dermatitis<br>[0.64] | Iron<br>[2.14]       | Congenital<br>[1.01] | Back Pain<br>[0.65]  | Diarrhea<br>[1.88]   |
| Ukraine                         | Neonatal<br>[1.62]   | Headaches<br>[0.89]  | Conduct<br>[0.98]      | Upper Digest<br>[5.88] | Back Pain<br>[0.91]    | Falls<br>[1.92]      | Dermatitis<br>[0.66] | Congenital<br>[1.06] | Iron<br>[1.25]       | Anxiety<br>[0.59]    |
| <b>High-income</b>              | Dermatitis<br>[1.2]  | Neonatal<br>[0.9]    | Headaches<br>[0.93]    | Anxiety<br>[1.09]      | Depression<br>[1.35]   | Back Pain<br>[1.02]  | Conduct<br>[1.02]    | Asthma<br>[1.04]     | Drugs<br>[2.85]      | Congenital<br>[0.93] |
| <b>Australasia</b>              | Asthma<br>[1.97]     | Anxiety<br>[1.19]    | Neonatal<br>[0.91]     | Falls<br>[2.01]        | Dermatitis<br>[1.08]   | Depression<br>[1.52] | Headaches<br>[0.84]  | Back Pain<br>[1.14]  | Conduct<br>[0.99]    | Congenital<br>[0.78] |
| Australia                       | Asthma<br>[2.03]     | Anxiety<br>[1.14]    | Neonatal<br>[0.88]     | Depression<br>[1.54]   | Falls<br>[1.92]        | Headaches<br>[0.83]  | Dermatitis<br>[1.03] | Back Pain<br>[1.08]  | Conduct<br>[0.97]    | Congenital<br>[0.78] |
| New Zealand                     | Anxiety<br>[1.48]    | Dermatitis<br>[1.35] | Neonatal<br>[1.02]     | Falls<br>[2.49]        | Back Pain<br>[1.43]    | Asthma<br>[1.66]     | Headaches<br>[0.85]  | Depression<br>[1.41] | Conduct<br>[1.06]    | Mech<br>[5.29]       |
| <b>High-income Asia Pacific</b> | Neonatal<br>[1.15]   | Dermatitis<br>[1.2]  | Back Pain<br>[1.2]     | Headaches<br>[0.77]    | Anxiety<br>[0.8]       | Conduct<br>[0.99]    | Depression<br>[0.95] | Falls<br>[1.18]      | Asthma<br>[0.81]     | Congenital<br>[0.93] |
| Brunei                          | Neonatal<br>[1.15]   | Dermatitis<br>[1.13] | Headaches<br>[0.74]    | Anxiety<br>[0.81]      | Back Pain<br>[0.96]    | Conduct<br>[0.92]    | Depression<br>[0.85] | Iron<br>[3.52]       | Falls<br>[1.09]      | Asthma<br>[0.77]     |
| Japan                           | Neonatal<br>[1.13]   | Dermatitis<br>[1.27] | Back Pain<br>[1.28]    | Headaches<br>[0.72]    | Conduct<br>[1.03]      | Anxiety<br>[0.78]    | Falls<br>[1.29]      | Depression<br>[0.92] | Congenital<br>[1.02] | Asthma<br>[0.82]     |
| Aichi                           | Neonatal<br>[1.16]   | Dermatitis<br>[1.28] | Back Pain<br>[1.25]    | Conduct<br>[1.02]      | Anxiety<br>[0.77]      | Headaches<br>[0.56]  | Falls<br>[1.24]      | Depression<br>[0.91] | ASD<br>[2.01]        | Asthma<br>[0.83]     |
| Akita                           | Neonatal<br>[1.21]   | Dermatitis<br>[1.25] | Back Pain<br>[1.38]    | Headaches<br>[0.77]    | Conduct<br>[1.05]      | Anxiety<br>[0.85]    | Depression<br>[1.05] | Falls<br>[1.45]      | Congenital<br>[1.09] | Asthma<br>[0.8]      |
| Aomori                          | Neonatal<br>[1.14]   | Dermatitis<br>[1.25] | Back Pain<br>[1.37]    | Headaches<br>[0.76]    | Conduct<br>[1.04]      | Anxiety<br>[0.84]    | Falls<br>[1.46]      | Depression<br>[1.0]  | Asthma<br>[0.8]      | Acne<br>[1.46]       |
| Chiba                           | Neonatal<br>[1.12]   | Dermatitis<br>[1.26] | Back Pain<br>[1.29]    | Headaches<br>[0.74]    | Conduct<br>[1.04]      | Anxiety<br>[0.79]    | Falls<br>[1.31]      | Depression<br>[0.94] | Congenital<br>[1.05] | Asthma<br>[0.82]     |
| Ehime                           | Dermatitis<br>[1.27] | Neonatal<br>[0.93]   | Back Pain<br>[1.28]    | Headaches<br>[0.73]    | Conduct<br>[1.03]      | Anxiety<br>[0.81]    | Falls<br>[1.37]      | Depression<br>[0.92] | Asthma<br>[0.8]      | Congenital<br>[0.93] |
| Fukui                           | Neonatal<br>[1.11]   | Dermatitis<br>[1.26] | Back Pain<br>[1.29]    | Headaches<br>[0.73]    | Conduct<br>[1.04]      | Anxiety<br>[0.8]     | Falls<br>[1.33]      | Depression<br>[0.91] | Asthma<br>[0.81]     | Congenital<br>[0.91] |
| Fukuoka                         | Neonatal<br>[1.11]   | Dermatitis<br>[1.28] | Back Pain<br>[1.24]    | Headaches<br>[0.71]    | Conduct<br>[1.0]       | Anxiety<br>[0.78]    | Falls<br>[1.3]       | Depression<br>[0.89] | Asthma<br>[0.82]     | Congenital<br>[0.97] |
| Fukushima                       | Neonatal<br>[1.04]   | Dermatitis<br>[1.25] | Back Pain<br>[1.34]    | Headaches<br>[0.74]    | Conduct<br>[1.04]      | Anxiety<br>[0.83]    | Falls<br>[1.43]      | Depression<br>[0.96] | Congenital<br>[1.01] | Asthma<br>[0.79]     |
| Gifu                            | Neonatal<br>[1.15]   | Dermatitis<br>[1.26] | Back Pain<br>[1.33]    | Headaches<br>[0.75]    | Conduct<br>[1.04]      | Anxiety<br>[0.81]    | Falls<br>[1.35]      | Depression<br>[0.81] | Iron<br>[3.19]       | Asthma<br>[0.81]     |
| Gunma                           | Neonatal<br>[1.08]   | Dermatitis<br>[1.25] | Back Pain<br>[1.34]    | Headaches<br>[0.75]    | Conduct<br>[1.05]      | Anxiety<br>[0.82]    | Falls<br>[1.37]      | Depression<br>[0.99] | Iron<br>[3.47]       | Asthma<br>[0.81]     |
| Hiroshima                       | Neonatal<br>[1.17]   | Dermatitis<br>[1.28] | Back Pain<br>[1.23]    | Headaches<br>[0.71]    | Conduct<br>[1.02]      | Anxiety<br>[0.77]    | Falls<br>[1.26]      | Depression<br>[0.87] | Asthma<br>[0.83]     | Congenital<br>[0.91] |
| Hokkaido                        | Neonatal<br>[1.08]   | Dermatitis<br>[1.26] | Back Pain<br>[1.32]    | Headaches<br>[0.74]    | Conduct<br>[1.03]      | Anxiety<br>[0.81]    | Falls<br>[1.39]      | Depression<br>[0.95] | Congenital<br>[1.0]  | Iron<br>[3.02]       |
| Hyogo                           | Neonatal<br>[1.14]   | Dermatitis<br>[1.26] | Back Pain<br>[1.29]    | Headaches<br>[0.74]    | Conduct<br>[1.03]      | Anxiety<br>[0.79]    | Falls<br>[1.3]       | Depression<br>[0.95] | Acne<br>[1.33]       | Asthma<br>[0.68]     |
| Ibaraki                         | Neonatal<br>[1.17]   | Dermatitis<br>[1.26] | Back Pain<br>[1.31]    | Conduct<br>[1.04]      | Anxiety<br>[0.81]      | Headaches<br>[0.65]  | Falls<br>[1.34]      | Depression<br>[0.96] | Congenital<br>[1.08] | Asthma<br>[0.81]     |
| Ishikawa                        | Neonatal<br>[1.09]   | Dermatitis<br>[1.26] | Back Pain<br>[1.31]    | Headaches<br>[0.75]    | Conduct<br>[1.04]      | Anxiety<br>[0.81]    | Falls<br>[1.33]      | Depression<br>[0.92] | Congenital<br>[1.0]  | Asthma<br>[0.82]     |
| Iwate                           | Neonatal<br>[1.17]   | Dermatitis<br>[1.26] | Back Pain<br>[1.34]    | Headaches<br>[0.74]    | Conduct<br>[1.03]      | Anxiety<br>[0.83]    | Depression<br>[1.0]  | Falls<br>[1.44]      | Congenital<br>[1.07] | Asthma<br>[0.8]      |

**Figure 9a. Leading ten causes of YLDs with the ratio of observed YLDs to YLDs expected on the basis of Socio-Demographic Index alone in 2017, <20 years, both sexes combined.** The top ten causes contributing to YLDs are listed globally, by socio-demographic quintile, and then by GBD superregion, region, country, and subnationally where modeled. For each cell, the ratio of observed YLDs to YLDs expected on the basis of socio-demographic index (SDI) alone are listed. Abbreviations: YLD=year of life lived with disability, GBD=Global Burden of Disease.

Values shown in brackets represent the ratio of observed YLDs to predicted YLDs on the basis of Socio-Demographic Index (SDI), rounded to two (2) digits. Color ranges (shown below) were calculated to place a roughly equal number of cells into each bin.

| COLOR KEY: |                      | [0.0-0.78]           | [0.78-0.88]          | [0.88-0.94]         | [0.94-1.0]        | [1.0-1.06]        | [1.06-1.18]          | [1.18-1.38]          | [1.38-1.66]          | 1.66+                |
|------------|----------------------|----------------------|----------------------|---------------------|-------------------|-------------------|----------------------|----------------------|----------------------|----------------------|
|            | 1                    | 2                    | 3                    | 4                   | 5                 | 6                 | 7                    | 8                    | 9                    | 10                   |
| Kagawa     | Neonatal<br>[1.07]   | Dermatitis<br>[1.26] | Back Pain<br>[1.28]  | Headaches<br>[0.74] | Conduct<br>[1.04] | Anxiety<br>[0.81] | Falls<br>[1.33]      | Depression<br>[0.91] | Asthma<br>[0.81]     | Congenital<br>[0.96] |
| Kagoshima  | Neonatal<br>[0.98]   | Dermatitis<br>[1.29] | Back Pain<br>[1.23]  | Headaches<br>[0.7]  | Conduct<br>[1.0]  | Anxiety<br>[0.79] | Falls<br>[1.38]      | Congenital<br>[1.13] | Asthma<br>[0.8]      | Depression<br>[0.76] |
| Kanagawa   | Neonatal<br>[1.18]   | Dermatitis<br>[1.27] | Back Pain<br>[1.26]  | Headaches<br>[0.73] | Conduct<br>[1.03] | Anxiety<br>[0.77] | Falls<br>[1.27]      | Depression<br>[0.95] | Congenital<br>[1.16] | Asthma<br>[0.84]     |
| Kochi      | Neonatal<br>[1.04]   | Dermatitis<br>[1.26] | Back Pain<br>[1.32]  | Headaches<br>[0.74] | Conduct<br>[1.03] | Anxiety<br>[0.83] | Falls<br>[1.42]      | Depression<br>[0.94] | Iron<br>[3.11]       | Asthma<br>[0.79]     |
| Kumamoto   | Neonatal<br>[1.02]   | Dermatitis<br>[1.29] | Back Pain<br>[1.23]  | Headaches<br>[0.69] | Conduct<br>[0.99] | Anxiety<br>[0.79] | Falls<br>[1.39]      | Depression<br>[0.86] | Asthma<br>[0.81]     | Iron<br>[2.6]        |
| Kyoto      | Neonatal<br>[1.17]   | Back Pain<br>[1.34]  | Dermatitis<br>[0.99] | Headaches<br>[0.76] | Conduct<br>[1.05] | Anxiety<br>[0.79] | Falls<br>[1.28]      | Depression<br>[0.97] | Congenital<br>[1.25] | Asthma<br>[0.83]     |
| Mie        | Neonatal<br>[1.16]   | Dermatitis<br>[1.27] | Back Pain<br>[1.28]  | Headaches<br>[0.73] | Conduct<br>[1.03] | Anxiety<br>[0.8]  | Falls<br>[1.31]      | Depression<br>[0.9]  | Iron<br>[3.27]       | Asthma<br>[0.82]     |
| Miyagi     | Neonatal<br>[1.07]   | Dermatitis<br>[1.26] | Back Pain<br>[1.32]  | Headaches<br>[0.74] | Conduct<br>[1.03] | Anxiety<br>[0.8]  | Falls<br>[1.36]      | Depression<br>[0.99] | Congenital<br>[1.1]  | Acne<br>[1.4]        |
| Miyazaki   | Neonatal<br>[1.02]   | Dermatitis<br>[1.29] | Back Pain<br>[1.25]  | Headaches<br>[0.7]  | Conduct<br>[1.0]  | Anxiety<br>[0.8]  | Falls<br>[1.42]      | Depression<br>[0.9]  | Iron<br>[3.0]        | Congenital<br>[1.01] |
| Nagano     | Neonatal<br>[1.18]   | Dermatitis<br>[1.26] | Back Pain<br>[1.3]   | Headaches<br>[0.74] | Conduct<br>[1.04] | Anxiety<br>[0.8]  | Falls<br>[1.36]      | Depression<br>[0.93] | Asthma<br>[0.82]     | Iron<br>[3.15]       |
| Nagasaki   | Neonatal<br>[1.02]   | Dermatitis<br>[1.28] | Back Pain<br>[1.25]  | Headaches<br>[0.72] | Conduct<br>[1.0]  | Anxiety<br>[0.81] | Falls<br>[1.42]      | Congenital<br>[1.12] | Depression<br>[0.89] | Asthma<br>[0.8]      |
| Nara       | Neonatal<br>[1.0]    | Dermatitis<br>[1.26] | Back Pain<br>[1.37]  | Headaches<br>[0.76] | Conduct<br>[1.05] | Anxiety<br>[0.82] | Falls<br>[1.38]      | Congenital<br>[1.23] | Depression<br>[0.95] | Asthma<br>[0.81]     |
| Niigata    | Neonatal<br>[1.14]   | Dermatitis<br>[1.26] | Back Pain<br>[1.47]  | Headaches<br>[0.74] | Conduct<br>[1.03] | Anxiety<br>[0.81] | Falls<br>[1.37]      | Depression<br>[0.99] | Congenital<br>[1.06] | Asthma<br>[0.81]     |
| Oita       | Neonatal<br>[1.19]   | Dermatitis<br>[1.27] | Back Pain<br>[1.26]  | Headaches<br>[0.72] | Conduct<br>[1.02] | Anxiety<br>[0.79] | Falls<br>[1.34]      | Depression<br>[0.91] | Asthma<br>[0.8]      | Iron<br>[2.79]       |
| Okayama    | Neonatal<br>[1.2]    | Dermatitis<br>[1.26] | Back Pain<br>[1.29]  | Headaches<br>[0.74] | Conduct<br>[1.03] | Anxiety<br>[0.79] | Falls<br>[1.31]      | Depression<br>[0.91] | Asthma<br>[0.81]     | Acne<br>[1.34]       |
| Okinawa    | Neonatal<br>[1.08]   | Dermatitis<br>[1.3]  | Back Pain<br>[1.19]  | Headaches<br>[0.68] | Conduct<br>[0.96] | Anxiety<br>[0.78] | Falls<br>[1.42]      | Depression<br>[0.84] | Iron<br>[2.34]       | Asthma<br>[0.67]     |
| Osaka      | Neonatal<br>[1.07]   | Dermatitis<br>[1.26] | Back Pain<br>[1.3]   | Headaches<br>[0.74] | Conduct<br>[1.04] | Anxiety<br>[0.79] | Falls<br>[1.3]       | Depression<br>[0.98] | Congenital<br>[1.09] | Asthma<br>[0.83]     |
| Saga       | Neonatal<br>[1.07]   | Dermatitis<br>[1.28] | Back Pain<br>[1.27]  | Headaches<br>[0.72] | Conduct<br>[1.01] | Anxiety<br>[0.8]  | Falls<br>[1.38]      | Depression<br>[0.88] | Asthma<br>[0.81]     | Congenital<br>[0.91] |
| Saitama    | Neonatal<br>[1.1]    | Dermatitis<br>[1.27] | Back Pain<br>[1.33]  | Headaches<br>[0.73] | Conduct<br>[1.02] | Anxiety<br>[0.8]  | Falls<br>[1.36]      | Depression<br>[0.96] | Asthma<br>[0.82]     | Acne<br>[1.35]       |
| Shiga      | Dermatitis<br>[1.55] | Neonatal<br>[1.06]   | Back Pain<br>[1.27]  | Headaches<br>[0.73] | Conduct<br>[1.04] | Anxiety<br>[0.78] | Falls<br>[1.27]      | Depression<br>[0.89] | Congenital<br>[1.03] | Asthma<br>[0.83]     |
| Shimane    | Neonatal<br>[1.05]   | Dermatitis<br>[1.27] | Back Pain<br>[1.19]  | Headaches<br>[0.71] | Conduct<br>[1.02] | Anxiety<br>[0.8]  | Falls<br>[1.4]       | Depression<br>[0.93] | Asthma<br>[0.79]     | Iron<br>[2.45]       |
| Shizuoka   | Neonatal<br>[1.24]   | Dermatitis<br>[1.27] | Back Pain<br>[1.25]  | Headaches<br>[0.72] | Conduct<br>[1.03] | Anxiety<br>[0.79] | Falls<br>[1.29]      | Depression<br>[0.9]  | Asthma<br>[0.82]     | Iron<br>[3.14]       |
| Tochigi    | Neonatal<br>[1.19]   | Dermatitis<br>[1.27] | Back Pain<br>[1.29]  | Headaches<br>[0.73] | Conduct<br>[1.03] | Anxiety<br>[0.79] | Congenital<br>[1.37] | Falls<br>[1.31]      | Depression<br>[0.91] | Asthma<br>[0.82]     |
| Tokushima  | Neonatal<br>[1.12]   | Dermatitis<br>[1.26] | Back Pain<br>[1.29]  | Headaches<br>[0.74] | Conduct<br>[1.02] | Anxiety<br>[0.81] | Falls<br>[1.34]      | Depression<br>[0.93] | Asthma<br>[0.8]      | Congenital<br>[0.93] |
| Tokyo      | Neonatal<br>[1.22]   | Dermatitis<br>[1.31] | Back Pain<br>[1.19]  | Headaches<br>[0.71] | Conduct<br>[1.02] | Anxiety<br>[0.71] | Falls<br>[1.09]      | Congenital<br>[1.26] | Depression<br>[0.83] | Asthma<br>[0.89]     |
| Tottori    | Neonatal<br>[1.14]   | Dermatitis<br>[1.28] | Back Pain<br>[1.26]  | Headaches<br>[0.67] | Conduct<br>[1.01] | Anxiety<br>[0.8]  | Falls<br>[1.38]      | Depression<br>[0.9]  | Congenital<br>[1.08] | Asthma<br>[0.81]     |
| Toyama     | Neonatal<br>[1.09]   | Dermatitis<br>[1.26] | Back Pain<br>[1.28]  | Headaches<br>[0.73] | Conduct<br>[1.05] | Anxiety<br>[0.8]  | Falls<br>[1.3]       | Depression<br>[0.93] | Iron<br>[3.7]        | Asthma<br>[0.82]     |
| Wakayama   | Neonatal<br>[1.17]   | Back Pain<br>[1.48]  | Dermatitis<br>[1.26] | Headaches<br>[0.73] | Conduct<br>[1.03] | Anxiety<br>[0.81] | Falls<br>[1.38]      | Depression<br>[0.94] | Asthma<br>[0.8]      | Iron<br>[2.83]       |
| Yamagata   | Neonatal<br>[0.96]   | Dermatitis<br>[1.26] | Back Pain<br>[1.34]  | Headaches<br>[0.74] | Conduct<br>[1.04] | Anxiety<br>[0.83] | Falls<br>[1.45]      | Depression<br>[0.92] | Iron<br>[2.93]       | Asthma<br>[0.8]      |
| Yamaguchi  | Neonatal<br>[0.99]   | Dermatitis<br>[1.27] | Back Pain<br>[1.28]  | Headaches<br>[0.73] | Conduct<br>[1.03] | Anxiety<br>[0.8]  | Falls<br>[1.33]      | Depression<br>[0.92] | Asthma<br>[0.81]     | Acne<br>[1.35]       |
| Yamanashi  | Neonatal<br>[1.24]   | Dermatitis<br>[1.24] | Back Pain<br>[1.36]  | Headaches<br>[0.76] | Conduct<br>[1.07] | Anxiety<br>[0.82] | Falls<br>[1.35]      | Depression<br>[0.96] | Congenital<br>[0.99] | Asthma<br>[0.81]     |

**eFigure 9a. Leading ten causes of YLDs with the ratio of observed YLDs to YLDs expected on the basis of Socio-Demographic Index alone in 2017, <20 years, both sexes combined.** The top ten causes contributing to YLDs are listed globally, by socio-demographic quintile, and then by GBD superregion, region, country, and subnationally where modeled. For each cell, the ratio of observed YLDs to YLDs expected on the basis of socio-demographic index (SDI) alone are listed. Abbreviations: YLD=year of life lived with disability, GBD=Global Burden of Disease.

Values shown in brackets represent the ratio of observed YLDs to predicted YLDs on the basis of Socio-Demographic Index (SDI), rounded to two (2) digits. Color ranges (shown below) were calculated to place a roughly equal number of cells into each bin.

| COLOR KEY:                |                      | [0.0-0.78]           | [0.78-0.88]          | [0.88-0.94]          | [0.94-1.0]           | [1.0-1.06]           | [1.06-1.18]          | [1.18-1.38]         | [1.38-1.66]          | 1.66+                |
|---------------------------|----------------------|----------------------|----------------------|----------------------|----------------------|----------------------|----------------------|---------------------|----------------------|----------------------|
|                           | 1                    | 2                    | 3                    | 4                    | 5                    | 6                    | 7                    | 8                   | 9                    | 10                   |
| S Korea                   | Neonatal<br>[1.17]   | Headaches<br>[0.89]  | Dermatitis<br>[1.08] | Back Pain<br>[1.08]  | Anxiety<br>[0.85]    | Conduct<br>[0.9]     | Depression<br>[0.99] | Falls<br>[1.0]      | Asthma<br>[0.8]      | Acne<br>[1.34]       |
| Singapore                 | Neonatal<br>[1.17]   | Dermatitis<br>[1.02] | Headaches<br>[0.71]  | Depression<br>[1.2]  | Anxiety<br>[0.8]     | Back Pain<br>[0.88]  | Conduct<br>[0.87]    | Falls<br>[1.03]     | Asthma<br>[0.8]      | Acne<br>[1.21]       |
| High-income North America | Dermatitis<br>[1.34] | Headaches<br>[1.01]  | Depression<br>[1.77] | Drugs<br>[5.58]      | Neonatal<br>[0.89]   | Anxiety<br>[1.01]    | Conduct<br>[1.19]    | Asthma<br>[1.16]    | Back Pain<br>[0.83]  | Skin Viral<br>[1.29] |
| Canada                    | Dermatitis<br>[1.45] | Headaches<br>[1.0]   | Drugs<br>[4.89]      | Depression<br>[1.28] | Asthma<br>[1.3]      | Anxiety<br>[0.8]     | Conduct<br>[0.98]    | Back Pain<br>[0.91] | Neonatal<br>[0.62]   | Skin Viral<br>[1.39] |
| Greenland                 | Depression<br>[2.35] | Dermatitis<br>[1.39] | Headaches<br>[0.97]  | Anxiety<br>[0.99]    | Asthma<br>[1.26]     | Drugs<br>[4.34]      | Neonatal<br>[0.61]   | Conduct<br>[0.96]   | Back Pain<br>[0.77]  | Skin Viral<br>[1.3]  |
| USA                       | Dermatitis<br>[1.33] | Depression<br>[1.82] | Headaches<br>[1.01]  | Drugs<br>[5.66]      | Neonatal<br>[0.91]   | Anxiety<br>[1.03]    | Conduct<br>[1.21]    | Asthma<br>[1.14]    | Back Pain<br>[0.82]  | Congenital<br>[0.88] |
| Alabama                   | Drugs<br>[6.99]      | Headaches<br>[1.04]  | Depression<br>[1.82] | Neonatal<br>[0.89]   | Dermatitis<br>[1.16] | Anxiety<br>[1.08]    | Conduct<br>[1.18]    | Back Pain<br>[1.08] | Asthma<br>[1.08]     | Skin Viral<br>[1.28] |
| Alaska                    | Headaches<br>[0.95]  | Depression<br>[1.71] | Dermatitis<br>[1.2]  | Drugs<br>[5.48]      | Neonatal<br>[0.86]   | Anxiety<br>[0.99]    | Conduct<br>[1.16]    | Back Pain<br>[0.88] | Asthma<br>[0.88]     | Congenital<br>[0.97] |
| Arizona                   | Drugs<br>[7.48]      | Depression<br>[2.1]  | Dermatitis<br>[1.36] | Headaches<br>[1.03]  | Neonatal<br>[0.9]    | Anxiety<br>[1.07]    | Conduct<br>[1.19]    | Asthma<br>[1.22]    | Back Pain<br>[0.91]  | Congenital<br>[0.85] |
| Arkansas                  | Depression<br>[2.11] | Drugs<br>[6.98]      | Headaches<br>[1.02]  | Anxiety<br>[1.08]    | Dermatitis<br>[1.07] | Neonatal<br>[0.79]   | Conduct<br>[1.18]    | Back Pain<br>[0.83] | Asthma<br>[0.83]     | Skin Viral<br>[1.09] |
| California                | Dermatitis<br>[1.49] | Headaches<br>[1.02]  | Depression<br>[1.76] | Anxiety<br>[1.0]     | Conduct<br>[1.2]     | Neonatal<br>[0.76]   | Drugs<br>[4.22]      | Asthma<br>[1.12]    | Back Pain<br>[0.7]   | Acne<br>[1.3]        |
| Colorado                  | Depression<br>[2.02] | Headaches<br>[1.03]  | Dermatitis<br>[1.19] | Neonatal<br>[0.92]   | Anxiety<br>[1.02]    | Drugs<br>[4.86]      | Conduct<br>[1.22]    | Asthma<br>[1.14]    | Back Pain<br>[0.83]  | Oth MSK<br>[6.32]    |
| Connecticut               | Drugs<br>[7.31]      | Dermatitis<br>[1.49] | Neonatal<br>[1.08]   | Headaches<br>[1.07]  | Depression<br>[1.67] | Anxiety<br>[1.03]    | Conduct<br>[1.25]    | Asthma<br>[1.52]    | Back Pain<br>[0.72]  | Skin Viral<br>[1.59] |
| Delaware                  | Drugs<br>[7.73]      | Depression<br>[1.92] | Headaches<br>[1.04]  | Dermatitis<br>[1.19] | Neonatal<br>[0.9]    | Anxiety<br>[1.04]    | Conduct<br>[1.2]     | Asthma<br>[1.25]    | Back Pain<br>[0.72]  | Skin Viral<br>[1.36] |
| DC                        | Dermatitis<br>[1.85] | Neonatal<br>[0.94]   | Headaches<br>[0.89]  | Drugs<br>[4.89]      | Anxiety<br>[0.89]    | Depression<br>[1.31] | Conduct<br>[1.03]    | Asthma<br>[1.25]    | Skin Viral<br>[1.45] | Congenital<br>[0.94] |
| Florida                   | Dermatitis<br>[1.31] | Neonatal<br>[1.01]   | Headaches<br>[1.03]  | Depression<br>[1.8]  | Drugs<br>[5.89]      | Anxiety<br>[1.04]    | Conduct<br>[1.2]     | Asthma<br>[1.21]    | Back Pain<br>[0.73]  | Psoriasis<br>[3.51]  |
| Georgia                   | Dermatitis<br>[1.43] | Headaches<br>[1.04]  | Depression<br>[1.76] | Drugs<br>[5.49]      | Neonatal<br>[0.84]   | Anxiety<br>[1.06]    | Conduct<br>[1.2]     | Asthma<br>[1.17]    | Back Pain<br>[0.82]  | Acne<br>[1.32]       |
| Hawaii                    | Dermatitis<br>[1.58] | Headaches<br>[0.97]  | Depression<br>[1.71] | Neonatal<br>[0.83]   | Anxiety<br>[0.99]    | Conduct<br>[1.16]    | Asthma<br>[1.26]     | Drugs<br>[2.76]     | Skin Viral<br>[1.5]  | Back Pain<br>[0.56]  |
| Idaho                     | Depression<br>[2.02] | Headaches<br>[1.01]  | Drugs<br>[5.52]      | Dermatitis<br>[1.1]  | Anxiety<br>[1.06]    | Conduct<br>[1.19]    | Neonatal<br>[0.74]   | Back Pain<br>[0.85] | Skin Viral<br>[1.4]  | Oth MSK<br>[6.95]    |
| Illinois                  | Neonatal<br>[1.06]   | Headaches<br>[1.03]  | Depression<br>[1.67] | Dermatitis<br>[1.16] | Anxiety<br>[1.03]    | Drugs<br>[4.88]      | Conduct<br>[1.21]    | Back Pain<br>[0.92] | Asthma<br>[1.07]     | Oth MSK<br>[6.54]    |
| Indiana                   | Drugs<br>[6.73]      | Depression<br>[1.94] | Headaches<br>[1.02]  | Dermatitis<br>[1.15] | Neonatal<br>[0.86]   | Anxiety<br>[1.06]    | Conduct<br>[1.19]    | Back Pain<br>[0.97] | Asthma<br>[1.1]      | Congenital<br>[0.96] |
| Iowa                      | Headaches<br>[1.01]  | Back Pain<br>[1.44]  | Depression<br>[1.71] | Neonatal<br>[0.87]   | Anxiety<br>[1.03]    | Dermatitis<br>[1.05] | Conduct<br>[1.19]    | Oth MSK<br>[7.75]   | Drugs<br>[2.81]      | Skin Viral<br>[1.36] |
| Kansas                    | Depression<br>[1.8]  | Headaches<br>[1.0]   | Neonatal<br>[0.93]   | Dermatitis<br>[1.11] | Anxiety<br>[1.02]    | Conduct<br>[1.19]    | Back Pain<br>[1.11]  | Drugs<br>[3.49]     | Asthma<br>[1.11]     | Oth MSK<br>[6.32]    |
| Kentucky                  | Drugs<br>[10.24]     | Depression<br>[1.94] | Headaches<br>[1.01]  | Dermatitis<br>[1.17] | Neonatal<br>[0.88]   | Anxiety<br>[1.07]    | Conduct<br>[1.17]    | Back Pain<br>[1.1]  | Asthma<br>[1.13]     | Oth MSK<br>[7.22]    |
| Louisiana                 | Drugs<br>[7.39]      | Headaches<br>[0.99]  | Dermatitis<br>[1.26] | Depression<br>[1.69] | Neonatal<br>[0.82]   | Anxiety<br>[1.04]    | Conduct<br>[1.15]    | Back Pain<br>[0.85] | Skin Viral<br>[1.66] | Asthma<br>[0.9]      |
| Maine                     | Drugs<br>[7.65]      | Depression<br>[1.97] | Headaches<br>[1.06]  | Neonatal<br>[0.91]   | Anxiety<br>[1.06]    | Conduct<br>[1.23]    | Dermatitis<br>[0.99] | Asthma<br>[1.25]    | Back Pain<br>[0.92]  | Oth MSK<br>[8.65]    |
| Maryland                  | Dermatitis<br>[1.51] | Neonatal<br>[1.06]   | Headaches<br>[1.01]  | Depression<br>[1.7]  | Anxiety<br>[1.0]     | Drugs<br>[4.49]      | Conduct<br>[1.21]    | Asthma<br>[1.29]    | Back Pain<br>[0.64]  | Psoriasis<br>[3.09]  |
| Massachusetts             | Drugs<br>[7.16]      | Dermatitis<br>[1.35] | Headaches<br>[1.06]  | Neonatal<br>[1.04]   | Depression<br>[1.79] | Anxiety<br>[1.01]    | Conduct<br>[1.24]    | Asthma<br>[1.32]    | Back Pain<br>[0.69]  | Skin Viral<br>[1.51] |
| Michigan                  | Drugs<br>[6.49]      | Depression<br>[1.92] | Dermatitis<br>[1.19] | Neonatal<br>[0.9]    | Anxiety<br>[1.05]    | Headaches<br>[0.85]  | Conduct<br>[1.21]    | Asthma<br>[1.23]    | Back Pain<br>[0.81]  | Skin Viral<br>[1.56] |
| Minnesota                 | Headaches<br>[1.01]  | Depression<br>[1.74] | Neonatal<br>[0.96]   | Anxiety<br>[1.0]     | Dermatitis<br>[1.05] | Conduct<br>[1.21]    | Back Pain<br>[0.71]  | Asthma<br>[0.95]    | Drugs<br>[2.79]      | Skin Viral<br>[1.49] |
| Mississippi               | Drugs<br>[6.5]       | Headaches<br>[1.03]  | Depression<br>[1.77] | Neonatal<br>[0.85]   | Anxiety<br>[1.1]     | Dermatitis<br>[1.06] | Conduct<br>[1.18]    | Back Pain<br>[0.76] | Asthma<br>[0.75]     | Skin Viral<br>[1.04] |

**eFigure 9a. Leading ten causes of YLDs with the ratio of observed YLDs to YLDs expected on the basis of Socio-Demographic Index alone in 2017, <20 years, both sexes combined.** The top ten causes contributing to YLDs are listed globally, by socio-demographic quintile, and then by GBD superregion, region, country, and subnationally where modeled. For each cell, the ratio of observed YLDs to YLDs expected on the basis of socio-demographic index (SDI) alone are listed. Abbreviations: YLD=year of life lived with disability, GBD=Global Burden of Disease.

Values shown in brackets represent the ratio of observed YLDs to predicted YLDs on the basis of Socio-Demographic Index (SDI), rounded to two (2) digits. Color ranges (shown below) were calculated to place a roughly equal number of cells into each bin.

| COLOR KEY:                    |                      | [0.0-0.78]           | [0.78-0.88]          | [0.88-0.94]          | [0.94-1.0]           | [1.0-1.06]           | [1.06-1.18]         | [1.18-1.38]          | [1.38-1.66]          | 1.66+                |
|-------------------------------|----------------------|----------------------|----------------------|----------------------|----------------------|----------------------|---------------------|----------------------|----------------------|----------------------|
|                               | 1                    | 2                    | 3                    | 4                    | 5                    | 6                    | 7                   | 8                    | 9                    | 10                   |
| Missouri                      | Depression<br>[1.94] | Headaches<br>[1.01]  | Drugs<br>[5.71]      | Neonatal<br>[0.92]   | Anxiety<br>[1.04]    | Dermatitis<br>[1.07] | Conduct<br>[1.18]   | Back Pain<br>[0.9]   | Asthma<br>[1.07]     | Oth MSK<br>[6.64]    |
| Montana                       | Depression<br>[1.87] | Headaches<br>[0.99]  | Neonatal<br>[0.89]   | Drugs<br>[5.19]      | Anxiety<br>[1.02]    | Dermatitis<br>[1.05] | Conduct<br>[1.18]   | Back Pain<br>[0.92]  | Oth MSK<br>[7.24]    | Asthma<br>[0.83]     |
| Nebraska                      | Headaches<br>[0.99]  | Depression<br>[1.65] | Neonatal<br>[0.88]   | Dermatitis<br>[1.06] | Anxiety<br>[1.0]     | Back Pain<br>[1.19]  | Conduct<br>[1.18]   | Drugs<br>[2.9]       | Asthma<br>[0.75]     | Congenital<br>[0.91] |
| Nevada                        | Drugs<br>[7.24]      | Depression<br>[1.88] | Dermatitis<br>[1.3]  | Headaches<br>[1.0]   | Neonatal<br>[0.85]   | Anxiety<br>[1.04]    | Conduct<br>[1.17]   | Asthma<br>[1.0]      | Back Pain<br>[0.7]   | Oth MSK<br>[5.42]    |
| New Hampshire                 | Drugs<br>[8.33]      | Depression<br>[2.06] | Headaches<br>[1.08]  | Anxiety<br>[1.04]    | Neonatal<br>[0.87]   | Dermatitis<br>[1.04] | Conduct<br>[1.27]   | Back Pain<br>[0.87]  | Asthma<br>[1.16]     | Oth MSK<br>[6.8]     |
| New Jersey                    | Dermatitis<br>[1.62] | Headaches<br>[1.03]  | Neonatal<br>[0.98]   | Drugs<br>[5.53]      | Depression<br>[1.53] | Anxiety<br>[1.01]    | Asthma<br>[1.52]    | Conduct<br>[1.22]    | Back Pain<br>[0.78]  | Congenital<br>[1.07] |
| New Mexico                    | Depression<br>[2.11] | Drugs<br>[6.56]      | Headaches<br>[1.02]  | Neonatal<br>[0.95]   | Dermatitis<br>[1.17] | Anxiety<br>[1.08]    | Conduct<br>[1.19]   | Asthma<br>[1.22]     | Back Pain<br>[0.98]  | Oth MSK<br>[6.71]    |
| New York                      | Dermatitis<br>[1.68] | Depression<br>[1.84] | Neonatal<br>[1.02]   | Headaches<br>[1.01]  | Drugs<br>[4.99]      | Asthma<br>[1.65]     | Anxiety<br>[0.99]   | Conduct<br>[1.19]    | Back Pain<br>[0.68]  | Acne<br>[1.45]       |
| N Carolina                    | Headaches<br>[1.03]  | Depression<br>[1.79] | Dermatitis<br>[1.23] | Drugs<br>[5.79]      | Neonatal<br>[0.91]   | Anxiety<br>[0.99]    | Conduct<br>[1.11]   | Asthma<br>[1.0]      | Back Pain<br>[0.73]  | Skin Viral<br>[1.25] |
| N Dakota                      | Neonatal<br>[0.96]   | Headaches<br>[0.93]  | Depression<br>[1.49] | Dermatitis<br>[1.04] | Anxiety<br>[0.94]    | Conduct<br>[1.12]    | Back Pain<br>[0.93] | Oth MSK<br>[8.67]    | Congenital<br>[1.17] | Asthma<br>[0.95]     |
| Ohio                          | Drugs<br>[8.24]      | Depression<br>[1.86] | Headaches<br>[1.03]  | Dermatitis<br>[1.26] | Neonatal<br>[0.87]   | Anxiety<br>[1.05]    | Conduct<br>[1.19]   | Asthma<br>[1.15]     | Back Pain<br>[0.88]  | Congenital<br>[0.99] |
| Oklahoma                      | Drugs<br>[7.74]      | Depression<br>[1.9]  | Dermatitis<br>[1.32] | Headaches<br>[1.01]  | Neonatal<br>[0.82]   | Anxiety<br>[1.05]    | Conduct<br>[1.17]   | Back Pain<br>[0.98]  | Asthma<br>[1.19]     | Oth MSK<br>[7.14]    |
| Oregon                        | Drugs<br>[7.2]       | Depression<br>[1.99] | Dermatitis<br>[1.39] | Headaches<br>[1.02]  | Neonatal<br>[0.78]   | Anxiety<br>[0.95]    | Conduct<br>[1.08]   | Back Pain<br>[0.76]  | Asthma<br>[0.91]     | Oth MSK<br>[6.66]    |
| Pennsylvania                  | Drugs<br>[8.0]       | Dermatitis<br>[1.3]  | Depression<br>[1.8]  | Headaches<br>[0.94]  | Neonatal<br>[0.91]   | Anxiety<br>[1.03]    | Conduct<br>[1.21]   | Back Pain<br>[1.05]  | Asthma<br>[1.29]     | Oth MSK<br>[7.16]    |
| Rhode Island                  | Drugs<br>[9.2]       | Depression<br>[2.02] | Headaches<br>[1.07]  | Dermatitis<br>[1.18] | Neonatal<br>[0.88]   | Anxiety<br>[1.04]    | Conduct<br>[1.23]   | Asthma<br>[1.25]     | Back Pain<br>[0.7]   | Skin Viral<br>[1.47] |
| S Carolina                    | Drugs<br>[7.01]      | Dermatitis<br>[1.42] | Depression<br>[1.88] | Headaches<br>[1.03]  | Neonatal<br>[0.85]   | Anxiety<br>[1.07]    | Conduct<br>[1.19]   | Back Pain<br>[0.88]  | Asthma<br>[1.03]     | Skin Viral<br>[1.28] |
| S Dakota                      | Headaches<br>[0.96]  | Depression<br>[1.52] | Dermatitis<br>[1.03] | Anxiety<br>[1.0]     | Back Pain<br>[1.17]  | Neonatal<br>[0.78]   | Conduct<br>[1.16]   | Oth MSK<br>[7.81]    | Drugs<br>[2.67]      | Skin Viral<br>[1.45] |
| Tennessee                     | Drugs<br>[8.26]      | Depression<br>[1.9]  | Headaches<br>[1.02]  | Dermatitis<br>[1.18] | Neonatal<br>[0.85]   | Anxiety<br>[1.06]    | Conduct<br>[1.17]   | Back Pain<br>[0.85]  | Asthma<br>[0.88]     | ASD<br>[1.51]        |
| Texas                         | Dermatitis<br>[1.39] | Headaches<br>[1.01]  | Neonatal<br>[0.97]   | Depression<br>[1.76] | Conduct<br>[1.36]    | Anxiety<br>[1.06]    | Asthma<br>[1.18]    | Drugs<br>[3.63]      | Back Pain<br>[0.8]   | ASD<br>[1.63]        |
| Utah                          | Depression<br>[2.14] | Drugs<br>[6.41]      | Headaches<br>[1.0]   | Dermatitis<br>[1.12] | Neonatal<br>[0.83]   | Anxiety<br>[1.03]    | Conduct<br>[1.18]   | Back Pain<br>[0.81]  | ASD<br>[1.92]        | Skin Viral<br>[1.49] |
| Vermont                       | Drugs<br>[6.23]      | Headaches<br>[1.08]  | Depression<br>[1.91] | Neonatal<br>[0.97]   | Anxiety<br>[1.05]    | Dermatitis<br>[1.02] | Conduct<br>[1.26]   | Back Pain<br>[0.8]   | Asthma<br>[1.04]     | Oth MSK<br>[6.17]    |
| Virginia                      | Dermatitis<br>[1.51] | Depression<br>[1.9]  | Headaches<br>[1.02]  | Neonatal<br>[0.99]   | Anxiety<br>[1.01]    | Drugs<br>[4.65]      | Conduct<br>[1.2]    | Asthma<br>[1.16]     | Back Pain<br>[0.74]  | Psoriasis<br>[2.85]  |
| Washington                    | Dermatitis<br>[1.36] | Depression<br>[1.92] | Headaches<br>[1.0]   | Drugs<br>[5.49]      | Neonatal<br>[0.84]   | Anxiety<br>[1.0]     | Conduct<br>[1.19]   | Back Pain<br>[0.81]  | Oth MSK<br>[7.13]    | Asthma<br>[0.87]     |
| W Virginia                    | Drugs<br>[12.4]      | Depression<br>[1.97] | Headaches<br>[1.02]  | Dermatitis<br>[1.19] | Neonatal<br>[0.86]   | Anxiety<br>[1.08]    | Conduct<br>[1.17]   | Asthma<br>[1.15]     | Back Pain<br>[0.93]  | Congenital<br>[0.78] |
| Wisconsin                     | Depression<br>[1.92] | Headaches<br>[1.03]  | Drugs<br>[5.99]      | Neonatal<br>[0.96]   | Anxiety<br>[1.03]    | Dermatitis<br>[1.05] | Conduct<br>[1.21]   | Back Pain<br>[0.95]  | Asthma<br>[0.89]     | Congenital<br>[0.95] |
| Wyoming                       | Depression<br>[1.98] | Headaches<br>[0.99]  | Dermatitis<br>[1.1]  | Anxiety<br>[1.01]    | Back Pain<br>[1.13]  | Conduct<br>[1.2]     | Neonatal<br>[0.74]  | Drugs<br>[3.42]      | Asthma<br>[0.88]     | Oth MSK<br>[6.74]    |
| <b>Southern Latin America</b> | Neonatal<br>[0.96]   | Anxiety<br>[1.34]    | Back Pain<br>[1.3]   | Dermatitis<br>[1.03] | Depression<br>[1.33] | Headaches<br>[0.64]  | Diarrhea<br>[2.29]  | Conduct<br>[0.91]    | Asthma<br>[0.94]     | Congenital<br>[0.75] |
| Argentina                     | Neonatal<br>[0.94]   | Anxiety<br>[1.35]    | Dermatitis<br>[0.97] | Back Pain<br>[1.17]  | Depression<br>[1.3]  | Diarrhea<br>[2.36]   | Conduct<br>[0.91]   | Headaches<br>[0.61]  | Asthma<br>[0.92]     | Congenital<br>[0.76] |
| Chile                         | Neonatal<br>[1.01]   | Back Pain<br>[1.71]  | Anxiety<br>[1.3]     | Dermatitis<br>[1.21] | Depression<br>[1.46] | Headaches<br>[0.69]  | Conduct<br>[0.9]    | Diarrhea<br>[2.26]   | Asthma<br>[0.96]     | Congenital<br>[0.73] |
| Uruguay                       | Neonatal<br>[1.0]    | Anxiety<br>[1.4]     | Dermatitis<br>[0.95] | Headaches<br>[0.67]  | Back Pain<br>[1.07]  | Conduct<br>[0.93]    | Asthma<br>[1.06]    | Depression<br>[1.12] | Iron<br>[0.92]       | Diarrhea<br>[1.17]   |
| <b>Western Europe</b>         | Anxiety<br>[1.23]    | Headaches<br>[0.97]  | Dermatitis<br>[1.12] | Neonatal<br>[0.83]   | Back Pain<br>[1.08]  | Depression<br>[1.08] | Conduct<br>[0.91]   | Asthma<br>[0.96]     | Congenital<br>[1.04] | Acne<br>[1.31]       |

**eFigure 9a. Leading ten causes of YLDs with the ratio of observed YLDs to YLDs expected on the basis of Socio-Demographic Index alone in 2017, <20 years, both sexes combined.** The top ten causes contributing to YLDs are listed globally, by socio-demographic quintile, and then by GBD superregion, region, country, and subnationally where modeled. For each cell, the ratio of observed YLDs to YLDs expected on the basis of socio-demographic index (SDI) alone are listed. Abbreviations: YLD=year of life lived with disability, GBD=Global Burden of Disease.

Values shown in brackets represent the ratio of observed YLDs to predicted YLDs on the basis of Socio-Demographic Index (SDI), rounded to two (2) digits. Color ranges (shown below) were calculated to place a roughly equal number of cells into each bin.

| COLOR KEY:           |                      | [0.0-0.78]           | [0.78-0.88]          | [0.88-0.94]          | [0.94-1.0]           | [1.0-1.06]           | [1.06-1.18]          | [1.18-1.38]          | [1.38-1.66]          | 1.66+                |
|----------------------|----------------------|----------------------|----------------------|----------------------|----------------------|----------------------|----------------------|----------------------|----------------------|----------------------|
|                      | 1                    | 2                    | 3                    | 4                    | 5                    | 6                    | 7                    | 8                    | 9                    | 10                   |
| Andorra              | Dermatitis<br>[1.4]  | Headaches<br>[1.07]  | Anxiety<br>[1.21]    | Neonatal<br>[0.86]   | Back Pain<br>[1.1]   | Depression<br>[1.11] | Conduct<br>[0.98]    | Asthma<br>[1.12]     | Congenital<br>[1.06] | Acne<br>[1.32]       |
| Austria              | Neonatal<br>[1.37]   | Headaches<br>[1.02]  | Anxiety<br>[1.17]    | Dermatitis<br>[0.76] | Back Pain<br>[0.85]  | Conduct<br>[0.89]    | Congenital<br>[1.06] | Asthma<br>[0.85]     | Depression<br>[0.77] | Falls<br>[0.93]      |
| Belgium              | Headaches<br>[1.2]   | Anxiety<br>[1.1]     | Dermatitis<br>[0.96] | Back Pain<br>[0.92]  | Neonatal<br>[0.58]   | Conduct<br>[0.89]    | Depression<br>[1.01] | Falls<br>[1.0]       | Congenital<br>[1.02] | Asthma<br>[0.77]     |
| Cyprus               | Neonatal<br>[1.09]   | Headaches<br>[0.97]  | Anxiety<br>[1.15]    | Back Pain<br>[1.07]  | Dermatitis<br>[0.8]  | Conduct<br>[0.88]    | Depression<br>[0.98] | Asthma<br>[0.87]     | Congenital<br>[1.0]  | Falls<br>[0.9]       |
| Denmark              | Dermatitis<br>[1.32] | Anxiety<br>[1.15]    | Back Pain<br>[1.37]  | Headaches<br>[0.85]  | Neonatal<br>[0.69]   | Conduct<br>[0.92]    | Asthma<br>[1.0]      | Congenital<br>[1.16] | Depression<br>[0.81] | Acne<br>[1.2]        |
| Finland              | Neonatal<br>[1.72]   | Dermatitis<br>[1.39] | Headaches<br>[0.98]  | Depression<br>[1.34] | Anxiety<br>[0.83]    | Conduct<br>[0.89]    | Asthma<br>[1.0]      | Congenital<br>[1.07] | Falls<br>[0.96]      | Back Pain<br>[0.62]  |
| France               | Anxiety<br>[1.4]     | Dermatitis<br>[1.25] | Headaches<br>[0.81]  | Back Pain<br>[1.06]  | Neonatal<br>[0.66]   | Depression<br>[1.12] | Conduct<br>[0.9]     | Asthma<br>[0.95]     | Congenital<br>[1.03] | Acne<br>[1.45]       |
| Germany              | Anxiety<br>[1.41]    | Neonatal<br>[0.96]   | Back Pain<br>[1.41]  | Headaches<br>[0.88]  | Dermatitis<br>[0.92] | Depression<br>[1.06] | Conduct<br>[0.91]    | Congenital<br>[1.0]  | Falls<br>[0.92]      | Epilepsy<br>[2.0]    |
| Greece               | Headaches<br>[1.18]  | Anxiety<br>[1.34]    | Neonatal<br>[0.85]   | Depression<br>[1.37] | Back Pain<br>[0.95]  | Conduct<br>[0.88]    | Dermatitis<br>[0.66] | Asthma<br>[0.81]     | Congenital<br>[0.99] | Acne<br>[1.47]       |
| Iceland              | Dermatitis<br>[1.45] | Headaches<br>[0.97]  | Anxiety<br>[1.11]    | Neonatal<br>[0.89]   | Asthma<br>[1.5]      | Back Pain<br>[0.98]  | Conduct<br>[0.9]     | Depression<br>[0.85] | Congenital<br>[0.99] | Acne<br>[1.22]       |
| Ireland              | Anxiety<br>[1.23]    | Dermatitis<br>[1.19] | Headaches<br>[0.94]  | Neonatal<br>[0.74]   | Asthma<br>[1.29]     | Depression<br>[1.14] | Conduct<br>[0.88]    | Back Pain<br>[0.76]  | Congenital<br>[1.14] | Falls<br>[0.9]       |
| Israel               | Neonatal<br>[0.95]   | Headaches<br>[0.88]  | Dermatitis<br>[1.06] | Back Pain<br>[1.05]  | Depression<br>[1.04] | Blindness<br>[2.78]  | Anxiety<br>[0.69]    | Conduct<br>[0.81]    | Congenital<br>[1.03] | Asthma<br>[0.84]     |
| Italy                | Headaches<br>[1.24]  | Anxiety<br>[1.28]    | Dermatitis<br>[0.94] | Back Pain<br>[1.03]  | Neonatal<br>[0.65]   | Depression<br>[1.11] | Conduct<br>[0.9]     | Congenital<br>[1.0]  | Acne<br>[1.39]       | URI<br>[1.2]         |
| Luxembourg           | Neonatal<br>[1.15]   | Headaches<br>[1.13]  | Dermatitis<br>[1.41] | Anxiety<br>[1.11]    | Back Pain<br>[0.96]  | Asthma<br>[1.19]     | Conduct<br>[0.91]    | Depression<br>[0.94] | Congenital<br>[1.07] | Acne<br>[1.22]       |
| Malta                | Headaches<br>[0.97]  | Anxiety<br>[1.18]    | Neonatal<br>[0.72]   | Back Pain<br>[1.08]  | Dermatitis<br>[0.82] | Conduct<br>[0.85]    | Depression<br>[1.0]  | Congenital<br>[1.21] | Asthma<br>[0.95]     | Falls<br>[1.18]      |
| Netherlands          | Anxiety<br>[1.41]    | Headaches<br>[1.08]  | Dermatitis<br>[1.22] | Neonatal<br>[0.88]   | Conduct<br>[1.03]    | Depression<br>[1.11] | Back Pain<br>[0.81]  | Asthma<br>[1.06]     | Congenital<br>[1.09] | Acne<br>[1.28]       |
| Norway               | Anxiety<br>[1.55]    | Dermatitis<br>[1.37] | Neonatal<br>[1.05]   | Headaches<br>[1.03]  | Asthma<br>[1.41]     | Back Pain<br>[0.91]  | Conduct<br>[0.98]    | Congenital<br>[1.47] | Depression<br>[0.98] | Falls<br>[1.06]      |
| Portugal             | Headaches<br>[1.07]  | Anxiety<br>[1.35]    | Back Pain<br>[1.19]  | Depression<br>[1.4]  | Asthma<br>[1.37]     | Dermatitis<br>[0.86] | Neonatal<br>[0.59]   | Conduct<br>[0.91]    | Acne<br>[1.6]        | Congenital<br>[0.82] |
| Spain                | Headaches<br>[1.15]  | Anxiety<br>[1.15]    | Back Pain<br>[1.15]  | Neonatal<br>[0.7]    | Conduct<br>[0.88]    | Depression<br>[1.02] | Dermatitis<br>[0.71] | Asthma<br>[0.78]     | Congenital<br>[0.95] | Falls<br>[0.95]      |
| Sweden               | Dermatitis<br>[1.76] | Headaches<br>[0.99]  | Anxiety<br>[1.09]    | Neonatal<br>[0.78]   | Asthma<br>[1.42]     | Depression<br>[1.13] | Conduct<br>[0.95]    | Back Pain<br>[0.85]  | Congenital<br>[1.23] | Falls<br>[1.09]      |
| Stockholm            | Dermatitis<br>[1.42] | Headaches<br>[0.95]  | Anxiety<br>[1.04]    | Neonatal<br>[0.76]   | Asthma<br>[1.25]     | Conduct<br>[0.95]    | Congenital<br>[1.29] | Depression<br>[0.88] | Falls<br>[0.99]      | Acne<br>[1.27]       |
| Sweden w/o Stockholm | Dermatitis<br>[1.86] | Headaches<br>[1.0]   | Anxiety<br>[1.11]    | Neonatal<br>[0.78]   | Asthma<br>[1.46]     | Depression<br>[1.2]  | Back Pain<br>[0.95]  | Conduct<br>[0.95]    | Congenital<br>[1.22] | Falls<br>[1.12]      |
| Switzerland          | Back Pain<br>[1.96]  | Dermatitis<br>[1.41] | Anxiety<br>[1.12]    | Neonatal<br>[0.85]   | Headaches<br>[0.81]  | Conduct<br>[0.89]    | Depression<br>[0.92] | Asthma<br>[0.99]     | Congenital<br>[1.04] | Acne<br>[1.21]       |
| UK                   | Dermatitis<br>[1.5]  | Neonatal<br>[0.99]   | Headaches<br>[0.88]  | Anxiety<br>[1.0]     | Asthma<br>[1.51]     | Conduct<br>[0.94]    | Depression<br>[1.05] | Back Pain<br>[0.86]  | Congenital<br>[1.16] | Falls<br>[0.98]      |
| England              | Dermatitis<br>[1.53] | Neonatal<br>[1.02]   | Headaches<br>[0.86]  | Asthma<br>[1.53]     | Anxiety<br>[0.97]    | Conduct<br>[0.95]    | Back Pain<br>[0.86]  | Depression<br>[1.03] | Congenital<br>[1.16] | Falls<br>[0.96]      |
| E Midlands           | Dermatitis<br>[1.5]  | Neonatal<br>[0.95]   | Headaches<br>[0.88]  | Anxiety<br>[1.0]     | Asthma<br>[1.45]     | Conduct<br>[0.96]    | Back Pain<br>[0.88]  | Depression<br>[1.06] | Congenital<br>[1.19] | Falls<br>[1.03]      |
| Derby                | Dermatitis<br>[1.51] | Neonatal<br>[0.97]   | Headaches<br>[0.84]  | Asthma<br>[1.46]     | Anxiety<br>[0.96]    | Conduct<br>[0.94]    | Back Pain<br>[0.85]  | Depression<br>[1.0]  | Congenital<br>[1.2]  | Falls<br>[0.97]      |
| Derbyshire           | Dermatitis<br>[1.49] | Neonatal<br>[0.88]   | Headaches<br>[0.9]   | Anxiety<br>[1.04]    | Asthma<br>[1.44]     | Conduct<br>[0.97]    | Depression<br>[1.09] | Back Pain<br>[0.8]   | Congenital<br>[1.17] | Iron<br>[2.39]       |
| Leicester            | Dermatitis<br>[1.5]  | Headaches<br>[0.86]  | Neonatal<br>[0.83]   | Asthma<br>[1.45]     | Anxiety<br>[0.97]    | Conduct<br>[0.94]    | Back Pain<br>[0.88]  | Depression<br>[1.03] | Congenital<br>[1.21] | Falls<br>[0.99]      |
| Leicestershire       | Dermatitis<br>[1.48] | Headaches<br>[0.92]  | Neonatal<br>[0.8]    | Anxiety<br>[1.01]    | Asthma<br>[1.46]     | Conduct<br>[0.99]    | Back Pain<br>[0.94]  | Depression<br>[1.1]  | Congenital<br>[1.21] | Falls<br>[1.01]      |
| Lincolnshire         | Dermatitis<br>[1.5]  | Neonatal<br>[0.94]   | Headaches<br>[0.89]  | Anxiety<br>[1.03]    | Asthma<br>[1.43]     | Conduct<br>[0.95]    | Back Pain<br>[0.92]  | Depression<br>[1.07] | Congenital<br>[1.17] | Falls<br>[1.08]      |

**eFigure 9a. Leading ten causes of YLDs with the ratio of observed YLDs to YLDs expected on the basis of Socio-Demographic Index alone in 2017, <20 years, both sexes combined.** The top ten causes contributing to YLDs are listed globally, by socio-demographic quintile, and then by GBD superregion, region, country, and subnationally where modeled. For each cell, the ratio of observed YLDs to YLDs expected on the basis of socio-demographic index (SDI) alone are listed. Abbreviations: YLD=year of life lived with disability, GBD=Global Burden of Disease.

Values shown in brackets represent the ratio of observed YLDs to predicted YLDs on the basis of Socio-Demographic Index (SDI), rounded to two (2) digits. Color ranges (shown below) were calculated to place a roughly equal number of cells into each bin.

| COLOR KEY:           |                      | [0.0-0.78]           | [0.78-0.88]         | [0.88-0.94]         | [0.94-1.0]         | [1.0-1.06]          | [1.06-1.18]          | [1.18-1.38]          | [1.38-1.66]          | 1.66+                |
|----------------------|----------------------|----------------------|---------------------|---------------------|--------------------|---------------------|----------------------|----------------------|----------------------|----------------------|
|                      | 1                    | 2                    | 3                   | 4                   | 5                  | 6                   | 7                    | 8                    | 9                    | 10                   |
| Northamptonshire     | Dermatitis<br>[1.51] | Neonatal<br>[1.05]   | Headaches<br>[0.85] | Anxiety<br>[0.98]   | Asthma<br>[1.44]   | Conduct<br>[0.94]   | Back Pain<br>[0.87]  | Depression<br>[1.01] | Congenital<br>[1.19] | Falls<br>[1.01]      |
| Nottingham           | Neonatal<br>[1.17]   | Dermatitis<br>[1.49] | Headaches<br>[0.9]  | Asthma<br>[1.51]    | Anxiety<br>[0.96]  | Back Pain<br>[0.91] | Conduct<br>[0.96]    | Depression<br>[1.07] | Congenital<br>[1.22] | Falls<br>[0.93]      |
| Nottinghamshire      | Dermatitis<br>[1.5]  | Neonatal<br>[1.05]   | Headaches<br>[0.87] | Anxiety<br>[1.01]   | Asthma<br>[1.43]   | Conduct<br>[0.95]   | Back Pain<br>[0.9]   | Depression<br>[1.05] | Congenital<br>[1.18] | Falls<br>[1.08]      |
| Rutland              | Dermatitis<br>[1.45] | Headaches<br>[0.99]  | Anxiety<br>[1.08]   | Asthma<br>[1.47]    | Neonatal<br>[0.67] | Back Pain<br>[1.02] | Conduct<br>[1.04]    | Depression<br>[1.2]  | Congenital<br>[1.18] | Acne<br>[1.53]       |
| E England            | Dermatitis<br>[1.5]  | Neonatal<br>[0.92]   | Headaches<br>[0.87] | Anxiety<br>[0.98]   | Asthma<br>[1.46]   | Conduct<br>[0.96]   | Back Pain<br>[0.87]  | Depression<br>[1.03] | Congenital<br>[1.09] | Falls<br>[1.0]       |
| Bedford              | Dermatitis<br>[1.5]  | Neonatal<br>[1.12]   | Headaches<br>[0.88] | Anxiety<br>[0.99]   | Asthma<br>[1.45]   | Conduct<br>[0.96]   | Back Pain<br>[0.9]   | Depression<br>[1.05] | Congenital<br>[1.09] | Falls<br>[0.99]      |
| Cambridgeshire       | Dermatitis<br>[1.5]  | Neonatal<br>[0.94]   | Headaches<br>[0.88] | Anxiety<br>[0.96]   | Asthma<br>[1.5]    | Conduct<br>[0.98]   | Depression<br>[1.05] | Back Pain<br>[0.82]  | Congenital<br>[1.13] | Falls<br>[0.92]      |
| Cen Bedfordshire     | Dermatitis<br>[1.51] | Neonatal<br>[1.0]    | Headaches<br>[0.85] | Anxiety<br>[0.98]   | Asthma<br>[1.44]   | Conduct<br>[0.95]   | Back Pain<br>[0.86]  | Depression<br>[1.02] | Congenital<br>[1.06] | Falls<br>[1.01]      |
| Essex                | Dermatitis<br>[1.5]  | Neonatal<br>[0.9]    | Headaches<br>[0.88] | Anxiety<br>[1.01]   | Asthma<br>[1.44]   | Conduct<br>[0.97]   | Back Pain<br>[0.89]  | Depression<br>[1.06] | Congenital<br>[1.08] | Falls<br>[1.03]      |
| Hertfordshire        | Dermatitis<br>[1.51] | Neonatal<br>[0.91]   | Headaches<br>[0.86] | Asthma<br>[1.49]    | Anxiety<br>[0.95]  | Conduct<br>[0.97]   | Back Pain<br>[0.85]  | Depression<br>[1.01] | Congenital<br>[1.1]  | Falls<br>[0.91]      |
| Luton                | Dermatitis<br>[1.52] | Neonatal<br>[1.04]   | Headaches<br>[0.82] | Asthma<br>[1.45]    | Anxiety<br>[0.95]  | Conduct<br>[0.93]   | Back Pain<br>[0.83]  | Depression<br>[0.97] | Congenital<br>[1.1]  | Falls<br>[0.99]      |
| Norfolk              | Dermatitis<br>[1.5]  | Headaches<br>[0.88]  | Neonatal<br>[0.78]  | Anxiety<br>[1.01]   | Asthma<br>[1.44]   | Conduct<br>[0.96]   | Back Pain<br>[0.9]   | Depression<br>[1.06] | Congenital<br>[1.08] | Falls<br>[1.05]      |
| Peterborough         | Dermatitis<br>[1.53] | Headaches<br>[0.8]   | Asthma<br>[1.45]    | Neonatal<br>[0.74]  | Anxiety<br>[0.95]  | Conduct<br>[0.91]   | Back Pain<br>[0.82]  | Depression<br>[0.95] | Congenital<br>[1.07] | Iron<br>[2.33]       |
| Southend-on-Sea      | Dermatitis<br>[1.52] | Neonatal<br>[1.09]   | Headaches<br>[0.84] | Asthma<br>[1.42]    | Anxiety<br>[0.99]  | Conduct<br>[0.93]   | Back Pain<br>[0.85]  | Depression<br>[1.01] | Congenital<br>[1.07] | Iron<br>[2.4]        |
| Suffolk              | Dermatitis<br>[1.5]  | Neonatal<br>[0.95]   | Headaches<br>[0.88] | Anxiety<br>[1.01]   | Asthma<br>[1.44]   | Conduct<br>[0.96]   | Back Pain<br>[0.89]  | Depression<br>[1.06] | Congenital<br>[1.07] | Iron<br>[2.57]       |
| Thurrock             | Dermatitis<br>[1.53] | Neonatal<br>[1.02]   | Headaches<br>[0.82] | Asthma<br>[1.43]    | Anxiety<br>[0.99]  | Conduct<br>[0.92]   | Back Pain<br>[0.83]  | Depression<br>[0.99] | Congenital<br>[1.06] | Falls<br>[1.08]      |
| Greater London       | Dermatitis<br>[1.54] | Neonatal<br>[1.07]   | Asthma<br>[1.76]    | Headaches<br>[0.81] | Anxiety<br>[0.88]  | Conduct<br>[0.93]   | Back Pain<br>[0.79]  | Depression<br>[0.94] | Congenital<br>[1.17] | URI<br>[1.26]        |
| Barking & Dagenham   | Dermatitis<br>[2.0]  | Neonatal<br>[1.01]   | Asthma<br>[1.62]    | Headaches<br>[0.75] | Anxiety<br>[0.93]  | Iron<br>[2.93]      | Conduct<br>[0.87]    | Back Pain<br>[0.78]  | Depression<br>[0.89] | Congenital<br>[1.07] |
| Barnet               | Dermatitis<br>[1.52] | Neonatal<br>[1.0]    | Asthma<br>[1.72]    | Headaches<br>[0.8]  | Anxiety<br>[0.91]  | Conduct<br>[0.93]   | Back Pain<br>[0.8]   | Depression<br>[0.95] | Congenital<br>[1.1]  | Falls<br>[0.89]      |
| Bexley               | Dermatitis<br>[1.5]  | Neonatal<br>[0.94]   | Asthma<br>[1.69]    | Headaches<br>[0.86] | Anxiety<br>[0.99]  | Conduct<br>[0.94]   | Back Pain<br>[0.89]  | Depression<br>[1.04] | Congenital<br>[1.07] | Falls<br>[1.03]      |
| Brent                | Dermatitis<br>[1.5]  | Neonatal<br>[1.06]   | Asthma<br>[1.7]     | Headaches<br>[0.81] | Anxiety<br>[0.93]  | Conduct<br>[0.94]   | Back Pain<br>[0.83]  | Depression<br>[0.97] | Congenital<br>[1.09] | Falls<br>[0.92]      |
| Bromley              | Dermatitis<br>[1.51] | Neonatal<br>[1.12]   | Asthma<br>[1.7]     | Headaches<br>[0.84] | Anxiety<br>[0.95]  | Conduct<br>[0.94]   | Back Pain<br>[0.85]  | Depression<br>[1.0]  | Congenital<br>[1.11] | Falls<br>[0.95]      |
| Camden               | Dermatitis<br>[1.52] | Asthma<br>[1.84]     | Neonatal<br>[0.94]  | Headaches<br>[0.88] | Anxiety<br>[0.89]  | Conduct<br>[0.96]   | Back Pain<br>[0.84]  | Depression<br>[1.02] | Congenital<br>[1.2]  | Acne<br>[1.11]       |
| Croydon              | Dermatitis<br>[1.53] | Neonatal<br>[1.01]   | Asthma<br>[1.67]    | Headaches<br>[0.8]  | Anxiety<br>[0.93]  | Conduct<br>[0.89]   | Back Pain<br>[0.81]  | Depression<br>[0.94] | Congenital<br>[1.1]  | Iron<br>[2.79]       |
| Ealing               | Dermatitis<br>[1.53] | Neonatal<br>[1.14]   | Asthma<br>[1.71]    | Headaches<br>[0.78] | Anxiety<br>[0.89]  | Conduct<br>[0.91]   | Back Pain<br>[0.78]  | Depression<br>[0.92] | Congenital<br>[1.1]  | Iron<br>[3.13]       |
| Enfield              | Dermatitis<br>[1.52] | Neonatal<br>[1.05]   | Asthma<br>[1.69]    | Headaches<br>[0.82] | Anxiety<br>[0.95]  | Conduct<br>[0.93]   | Back Pain<br>[0.83]  | Depression<br>[0.97] | Congenital<br>[1.09] | Falls<br>[0.97]      |
| Greenwich            | Dermatitis<br>[1.53] | Neonatal<br>[0.99]   | Asthma<br>[1.66]    | Headaches<br>[0.79] | Anxiety<br>[0.92]  | Conduct<br>[0.88]   | Back Pain<br>[0.81]  | Depression<br>[0.94] | Congenital<br>[1.11] | URI<br>[1.28]        |
| Hackney              | Dermatitis<br>[1.52] | Neonatal<br>[1.06]   | Asthma<br>[1.8]     | Headaches<br>[0.79] | Anxiety<br>[0.87]  | Conduct<br>[0.9]    | Back Pain<br>[0.78]  | Depression<br>[0.92] | Congenital<br>[1.16] | URI<br>[1.26]        |
| Hammersmith & Fulham | Dermatitis<br>[1.55] | Neonatal<br>[1.06]   | Asthma<br>[1.79]    | Headaches<br>[0.78] | Anxiety<br>[0.83]  | Conduct<br>[0.9]    | Back Pain<br>[0.74]  | Depression<br>[0.9]  | Congenital<br>[1.2]  | URI<br>[1.27]        |
| Haringey             | Dermatitis<br>[1.5]  | Neonatal<br>[1.1]    | Asthma<br>[1.7]     | Headaches<br>[0.84] | Anxiety<br>[0.95]  | Conduct<br>[0.95]   | Back Pain<br>[0.85]  | Depression<br>[0.99] | Congenital<br>[1.13] | Falls<br>[0.92]      |
| Harrow               | Dermatitis<br>[1.51] | Neonatal<br>[1.15]   | Asthma<br>[1.7]     | Headaches<br>[0.83] | Anxiety<br>[0.95]  | Conduct<br>[0.94]   | Back Pain<br>[0.84]  | Depression<br>[0.99] | Congenital<br>[1.11] | Falls<br>[0.94]      |

**eFigure 9a. Leading ten causes of YLDs with the ratio of observed YLDs to YLDs expected on the basis of Socio-Demographic Index alone in 2017, <20 years, both sexes combined.** The top ten causes contributing to YLDs are listed globally, by socio-demographic quintile, and then by GBD superregion, region, country, and subnationally where modeled. For each cell, the ratio of observed YLDs to YLDs expected on the basis of socio-demographic index (SDI) alone are listed. Abbreviations: YLD=year of life lived with disability, GBD=Global Burden of Disease.

Values shown in brackets represent the ratio of observed YLDs to predicted YLDs on the basis of Socio-Demographic Index (SDI), rounded to two (2) digits. Color ranges (shown below) were calculated to place a roughly equal number of cells into each bin.

| COLOR KEY:           |                      | [0.0-0.78]           | [0.78-0.88]         | [0.88-0.94]         | [0.94-1.0]        | [1.0-1.06]          | [1.06-1.18]          | [1.18-1.38]          | [1.38-1.66]          | 1.66+               |
|----------------------|----------------------|----------------------|---------------------|---------------------|-------------------|---------------------|----------------------|----------------------|----------------------|---------------------|
|                      | 1                    | 2                    | 3                   | 4                   | 5                 | 6                   | 7                    | 8                    | 9                    | 10                  |
| Havering             | Dermatitis<br>[1.5]  | Neonatal<br>[0.99]   | Asthma<br>[1.68]    | Headaches<br>[0.85] | Anxiety<br>[0.98] | Conduct<br>[0.93]   | Back Pain<br>[0.88]  | Depression<br>[1.03] | Congenital<br>[1.08] | Falls<br>[1.03]     |
| Hillingdon           | Dermatitis<br>[1.51] | Neonatal<br>[1.18]   | Asthma<br>[1.77]    | Headaches<br>[0.83] | Anxiety<br>[0.91] | Conduct<br>[0.94]   | Back Pain<br>[0.83]  | Depression<br>[0.98] | Congenital<br>[1.13] | Falls<br>[0.86]     |
| Hounslow             | Dermatitis<br>[1.54] | Neonatal<br>[1.12]   | Asthma<br>[1.73]    | Headaches<br>[0.77] | Anxiety<br>[0.86] | Conduct<br>[0.89]   | Back Pain<br>[0.75]  | Depression<br>[0.9]  | Congenital<br>[1.13] | URI<br>[1.27]       |
| Islington            | Dermatitis<br>[1.53] | Asthma<br>[1.8]      | Neonatal<br>[0.92]  | Headaches<br>[0.82] | Anxiety<br>[0.85] | Conduct<br>[0.91]   | Back Pain<br>[0.79]  | Depression<br>[0.95] | Congenital<br>[1.21] | URI<br>[1.25]       |
| Kensington & Chelsea | Dermatitis<br>[1.53] | Asthma<br>[1.81]     | Neonatal<br>[0.91]  | Headaches<br>[0.83] | Anxiety<br>[0.85] | Conduct<br>[0.94]   | Back Pain<br>[0.79]  | Depression<br>[0.96] | Congenital<br>[1.2]  | Falls<br>[0.74]     |
| Kingston upon Thames | Dermatitis<br>[1.53] | Neonatal<br>[1.12]   | Asthma<br>[1.76]    | Headaches<br>[0.84] | Anxiety<br>[0.9]  | Conduct<br>[0.92]   | Back Pain<br>[0.82]  | Depression<br>[0.98] | Congenital<br>[1.17] | URI<br>[1.27]       |
| Lambeth              | Dermatitis<br>[1.53] | Asthma<br>[1.74]     | Headaches<br>[0.8]  | Neonatal<br>[0.78]  | Anxiety<br>[0.86] | Conduct<br>[0.91]   | Back Pain<br>[0.77]  | Depression<br>[0.92] | Congenital<br>[1.19] | URI<br>[1.26]       |
| Lewisham             | Neonatal<br>[1.22]   | Dermatitis<br>[1.53] | Asthma<br>[1.66]    | Headaches<br>[0.76] | Anxiety<br>[0.89] | Conduct<br>[0.87]   | Back Pain<br>[0.77]  | Depression<br>[0.9]  | Congenital<br>[1.12] | URI<br>[1.28]       |
| Merton               | Dermatitis<br>[1.54] | Neonatal<br>[1.07]   | Asthma<br>[1.7]     | Headaches<br>[0.75] | Anxiety<br>[0.85] | Conduct<br>[0.88]   | Back Pain<br>[0.74]  | Congenital<br>[1.15] | Depression<br>[0.88] | Iron<br>[3.27]      |
| Newham               | Dermatitis<br>[1.51] | Neonatal<br>[1.09]   | Asthma<br>[1.66]    | Headaches<br>[0.8]  | Anxiety<br>[0.92] | Conduct<br>[0.89]   | Back Pain<br>[0.82]  | Depression<br>[0.95] | Congenital<br>[1.11] | URI<br>[1.28]       |
| Redbridge            | Dermatitis<br>[1.52] | Neonatal<br>[1.01]   | Asthma<br>[1.67]    | Headaches<br>[0.8]  | Anxiety<br>[0.94] | Conduct<br>[0.91]   | Back Pain<br>[0.82]  | Depression<br>[0.95] | Congenital<br>[1.16] | Iron<br>[2.57]      |
| Richmond upon Thames | Dermatitis<br>[1.54] | Neonatal<br>[1.18]   | Asthma<br>[1.76]    | Headaches<br>[0.79] | Anxiety<br>[0.87] | Conduct<br>[0.92]   | Back Pain<br>[0.76]  | Depression<br>[0.91] | Congenital<br>[1.18] | URI<br>[1.28]       |
| Southwark            | Dermatitis<br>[1.54] | Asthma<br>[1.77]     | Neonatal<br>[0.8]   | Headaches<br>[0.78] | Anxiety<br>[0.84] | Conduct<br>[0.9]    | Back Pain<br>[0.75]  | Depression<br>[0.9]  | Congenital<br>[1.21] | URI<br>[1.27]       |
| Sutton               | Neonatal<br>[1.28]   | Dermatitis<br>[1.52] | Asthma<br>[1.69]    | Headaches<br>[0.82] | Anxiety<br>[0.94] | Conduct<br>[0.92]   | Back Pain<br>[0.83]  | Depression<br>[0.98] | Congenital<br>[1.11] | Falls<br>[0.95]     |
| Tower Hamlets        | Dermatitis<br>[1.52] | Neonatal<br>[1.16]   | Asthma<br>[1.79]    | Headaches<br>[0.79] | Anxiety<br>[0.85] | Conduct<br>[0.91]   | Back Pain<br>[0.77]  | Depression<br>[0.92] | Congenital<br>[1.19] | URI<br>[1.26]       |
| Waltham Forest       | Dermatitis<br>[1.53] | Neonatal<br>[1.02]   | Asthma<br>[1.63]    | Headaches<br>[0.77] | Anxiety<br>[0.92] | Conduct<br>[0.87]   | Back Pain<br>[0.79]  | Depression<br>[0.92] | Congenital<br>[1.11] | URI<br>[1.29]       |
| Wandsworth           | Dermatitis<br>[1.55] | Neonatal<br>[0.95]   | Asthma<br>[1.72]    | Headaches<br>[0.74] | Anxiety<br>[0.8]  | Conduct<br>[0.86]   | Congenital<br>[1.22] | Back Pain<br>[0.7]   | Depression<br>[0.85] | URI<br>[1.28]       |
| Westminster          | Dermatitis<br>[1.52] | Asthma<br>[1.86]     | Headaches<br>[0.85] | Neonatal<br>[0.85]  | Anxiety<br>[0.88] | Conduct<br>[0.96]   | Back Pain<br>[0.82]  | Depression<br>[0.99] | Congenital<br>[1.19] | Falls<br>[0.77]     |
| NE England           | Dermatitis<br>[1.61] | Neonatal<br>[0.9]    | Headaches<br>[0.88] | Anxiety<br>[1.01]   | Asthma<br>[1.45]  | Conduct<br>[0.95]   | Congenital<br>[1.35] | Back Pain<br>[0.89]  | Depression<br>[1.05] | Iron<br>[2.8]       |
| County Durham        | Dermatitis<br>[1.78] | Neonatal<br>[0.97]   | Headaches<br>[0.88] | Asthma<br>[1.46]    | Anxiety<br>[1.02] | Conduct<br>[0.94]   | Congenital<br>[1.33] | Depression<br>[1.06] | Iron<br>[3.0]        | Back Pain<br>[0.84] |
| Darlington           | Dermatitis<br>[1.5]  | Neonatal<br>[0.88]   | Headaches<br>[0.87] | Asthma<br>[1.48]    | Anxiety<br>[1.0]  | Conduct<br>[0.96]   | Congenital<br>[1.35] | Back Pain<br>[0.9]   | Depression<br>[1.04] | Iron<br>[2.94]      |
| Gateshead            | Dermatitis<br>[1.77] | Neonatal<br>[1.01]   | Headaches<br>[0.85] | Asthma<br>[1.46]    | Anxiety<br>[0.98] | Conduct<br>[0.93]   | Congenital<br>[1.35] | Back Pain<br>[0.88]  | Depression<br>[1.02] | Iron<br>[3.11]      |
| Hartlepool           | Dermatitis<br>[1.5]  | Neonatal<br>[1.02]   | Headaches<br>[0.88] | Asthma<br>[1.46]    | Anxiety<br>[1.04] | Conduct<br>[0.94]   | Congenital<br>[1.32] | Back Pain<br>[0.91]  | Depression<br>[1.07] | Iron<br>[2.04]      |
| Middlesbrough        | Dermatitis<br>[1.51] | Headaches<br>[0.85]  | Neonatal<br>[0.79]  | Asthma<br>[1.46]    | Anxiety<br>[0.99] | Conduct<br>[0.92]   | Congenital<br>[1.34] | Back Pain<br>[0.87]  | Depression<br>[1.02] | Iron<br>[2.35]      |
| Newcastle upon Tyne  | Dermatitis<br>[1.48] | Headaches<br>[0.91]  | Neonatal<br>[0.86]  | Asthma<br>[1.53]    | Anxiety<br>[0.96] | Back Pain<br>[0.92] | Conduct<br>[0.96]    | Depression<br>[1.09] | Congenital<br>[1.41] | Drugs<br>[2.36]     |
| N Tyneside           | Dermatitis<br>[1.5]  | Neonatal<br>[0.84]   | Headaches<br>[0.85] | Asthma<br>[1.46]    | Anxiety<br>[0.98] | Conduct<br>[0.94]   | Congenital<br>[1.36] | Back Pain<br>[0.86]  | Depression<br>[1.01] | Iron<br>[2.77]      |
| Northumberland       | Dermatitis<br>[1.48] | Headaches<br>[0.91]  | Neonatal<br>[0.86]  | Anxiety<br>[1.05]   | Asthma<br>[1.47]  | Conduct<br>[0.99]   | Back Pain<br>[0.94]  | Congenital<br>[1.34] | Depression<br>[1.1]  | Iron<br>[2.58]      |
| Redcar & Cleveland   | Dermatitis<br>[1.5]  | Headaches<br>[0.87]  | Neonatal<br>[0.81]  | Asthma<br>[1.44]    | Anxiety<br>[1.04] | Conduct<br>[0.95]   | Congenital<br>[1.32] | Back Pain<br>[0.91]  | Depression<br>[1.06] | Iron<br>[2.23]      |
| S Tyneside           | Dermatitis<br>[1.79] | Neonatal<br>[0.86]   | Headaches<br>[0.87] | Asthma<br>[1.43]    | Anxiety<br>[1.02] | Conduct<br>[0.92]   | Congenital<br>[1.32] | Back Pain<br>[0.9]   | Depression<br>[1.05] | Iron<br>[2.57]      |
| Stockton-on-Tees     | Dermatitis<br>[1.51] | Neonatal<br>[1.1]    | Headaches<br>[0.85] | Asthma<br>[1.47]    | Anxiety<br>[0.98] | Conduct<br>[0.94]   | Congenital<br>[1.35] | Back Pain<br>[0.87]  | Depression<br>[1.02] | Iron<br>[2.8]       |
| Sunderland           | Dermatitis<br>[1.77] | Headaches<br>[0.89]  | Neonatal<br>[0.77]  | Anxiety<br>[1.02]   | Asthma<br>[1.3]   | Conduct<br>[0.96]   | Back Pain<br>[0.91]  | Congenital<br>[1.34] | Depression<br>[1.07] | Iron<br>[2.71]      |

**eFigure 9a. Leading ten causes of YLDs with the ratio of observed YLDs to YLDs expected on the basis of Socio-Demographic Index alone in 2017, <20 years, both sexes combined.** The top ten causes contributing to YLDs are listed globally, by socio-demographic quintile, and then by GBD superregion, region, country, and subnationally where modeled. For each cell, the ratio of observed YLDs to YLDs expected on the basis of socio-demographic index (SDI) alone are listed. Abbreviations: YLD=year of life lived with disability, GBD=Global Burden of Disease.

Values shown in brackets represent the ratio of observed YLDs to predicted YLDs on the basis of Socio-Demographic Index (SDI), rounded to two (2) digits. Color ranges (shown below) were calculated to place a roughly equal number of cells into each bin.

| COLOR KEY:            |                      | [0.0-0.78]           | [0.78-0.88]         | [0.88-0.94]         | [0.94-1.0]        | [1.0-1.06]           | [1.06-1.18]          | [1.18-1.38]          | [1.38-1.66]          | 1.66+           |
|-----------------------|----------------------|----------------------|---------------------|---------------------|-------------------|----------------------|----------------------|----------------------|----------------------|-----------------|
|                       | 1                    | 2                    | 3                   | 4                   | 5                 | 6                    | 7                    | 8                    | 9                    | 10              |
| NW England            | Dermatitis<br>[1.5]  | Neonatal<br>[1.11]   | Headaches<br>[0.87] | Asthma<br>[1.48]    | Anxiety<br>[0.98] | Conduct<br>[0.95]    | Back Pain<br>[0.87]  | Depression<br>[1.05] | Congenital<br>[1.28] | Falls<br>[1.01] |
| Blackburn with Darwen | Dermatitis<br>[1.51] | Neonatal<br>[1.09]   | Headaches<br>[0.85] | Asthma<br>[1.45]    | Anxiety<br>[1.01] | Conduct<br>[0.94]    | Back Pain<br>[0.89]  | Depression<br>[1.02] | Congenital<br>[1.21] | Iron<br>[2.44]  |
| Blackpool             | Dermatitis<br>[1.52] | Neonatal<br>[1.05]   | Headaches<br>[0.87] | Asthma<br>[1.46]    | Anxiety<br>[1.05] | Conduct<br>[0.93]    | Back Pain<br>[0.91]  | Depression<br>[1.06] | Congenital<br>[1.21] | Iron<br>[1.78]  |
| Bolton                | Dermatitis<br>[1.5]  | Neonatal<br>[1.04]   | Headaches<br>[0.85] | Asthma<br>[1.44]    | Anxiety<br>[1.0]  | Conduct<br>[0.94]    | Back Pain<br>[0.9]   | Depression<br>[1.03] | Congenital<br>[1.22] | Iron<br>[2.34]  |
| Bury                  | Dermatitis<br>[1.51] | Neonatal<br>[1.0]    | Headaches<br>[0.84] | Asthma<br>[1.43]    | Anxiety<br>[0.99] | Conduct<br>[0.94]    | Back Pain<br>[0.88]  | Congenital<br>[1.24] | Depression<br>[1.0]  | Iron<br>[2.59]  |
| Cheshire E            | Neonatal<br>[1.37]   | Dermatitis<br>[1.49] | Headaches<br>[0.9]  | Anxiety<br>[0.99]   | Asthma<br>[1.52]  | Conduct<br>[1.0]     | Back Pain<br>[0.91]  | Congenital<br>[1.39] | Depression<br>[1.07] | Falls<br>[0.94] |
| Cheshire W & Chester  | Dermatitis<br>[1.49] | Neonatal<br>[1.12]   | Headaches<br>[0.9]  | Anxiety<br>[0.99]   | Asthma<br>[1.49]  | Conduct<br>[0.98]    | Back Pain<br>[0.9]   | Congenital<br>[1.39] | Depression<br>[1.07] | Falls<br>[0.96] |
| Cumbria               | Dermatitis<br>[1.49] | Neonatal<br>[1.09]   | Headaches<br>[0.9]  | Anxiety<br>[1.02]   | Asthma<br>[1.48]  | Conduct<br>[0.98]    | Back Pain<br>[0.92]  | Depression<br>[1.08] | Congenital<br>[1.23] | Falls<br>[1.04] |
| Halton                | Dermatitis<br>[1.51] | Neonatal<br>[1.13]   | Headaches<br>[0.87] | Asthma<br>[1.48]    | Anxiety<br>[1.01] | Conduct<br>[0.96]    | Back Pain<br>[0.88]  | Depression<br>[1.04] | Congenital<br>[1.23] | Iron<br>[2.63]  |
| Knowsley              | Dermatitis<br>[1.5]  | Neonatal<br>[1.08]   | Headaches<br>[0.87] | Asthma<br>[1.48]    | Anxiety<br>[1.0]  | Conduct<br>[0.94]    | Congenital<br>[1.34] | Back Pain<br>[0.89]  | Depression<br>[1.04] | Iron<br>[2.29]  |
| Lancashire            | Dermatitis<br>[1.49] | Neonatal<br>[1.07]   | Headaches<br>[0.89] | Anxiety<br>[1.0]    | Asthma<br>[1.47]  | Conduct<br>[0.96]    | Depression<br>[1.06] | Back Pain<br>[0.84]  | Congenital<br>[1.24] | Falls<br>[1.04] |
| Liverpool             | Neonatal<br>[1.22]   | Dermatitis<br>[1.49] | Headaches<br>[0.9]  | Asthma<br>[1.48]    | Anxiety<br>[0.9]  | Depression<br>[1.24] | Congenital<br>[1.41] | Conduct<br>[0.94]    | Back Pain<br>[0.9]   | Falls<br>[0.97] |
| Manchester            | Neonatal<br>[1.23]   | Dermatitis<br>[1.51] | Headaches<br>[0.84] | Asthma<br>[1.54]    | Anxiety<br>[0.91] | Back Pain<br>[0.87]  | Conduct<br>[0.93]    | Congenital<br>[1.32] | Depression<br>[0.99] | Falls<br>[0.85] |
| Oldham                | Dermatitis<br>[1.51] | Neonatal<br>[0.82]   | Headaches<br>[0.86] | Asthma<br>[1.47]    | Anxiety<br>[1.03] | Conduct<br>[0.94]    | Back Pain<br>[0.91]  | Depression<br>[1.04] | Congenital<br>[1.22] | Iron<br>[1.95]  |
| Rochdale              | Dermatitis<br>[1.51] | Neonatal<br>[0.84]   | Headaches<br>[0.85] | Asthma<br>[1.45]    | Anxiety<br>[1.02] | Conduct<br>[0.93]    | Back Pain<br>[0.9]   | Depression<br>[1.03] | Congenital<br>[1.21] | Iron<br>[2.35]  |
| Salford               | Neonatal<br>[1.25]   | Dermatitis<br>[1.53] | Headaches<br>[0.8]  | Asthma<br>[1.47]    | Anxiety<br>[0.93] | Conduct<br>[0.9]     | Congenital<br>[1.26] | Back Pain<br>[0.82]  | Depression<br>[0.95] | Falls<br>[0.96] |
| Sefton                | Dermatitis<br>[1.5]  | Neonatal<br>[1.1]    | Headaches<br>[0.87] | Asthma<br>[1.45]    | Anxiety<br>[1.01] | Conduct<br>[0.95]    | Congenital<br>[1.34] | Back Pain<br>[0.89]  | Depression<br>[1.05] | Iron<br>[2.41]  |
| St Helens             | Dermatitis<br>[1.51] | Neonatal<br>[1.11]   | Headaches<br>[0.86] | Asthma<br>[1.44]    | Anxiety<br>[1.01] | Conduct<br>[0.94]    | Congenital<br>[1.33] | Back Pain<br>[0.89]  | Depression<br>[1.03] | Iron<br>[2.15]  |
| Stockport             | Dermatitis<br>[1.51] | Neonatal<br>[0.94]   | Headaches<br>[0.85] | Asthma<br>[1.47]    | Anxiety<br>[0.97] | Conduct<br>[0.95]    | Back Pain<br>[0.87]  | Depression<br>[1.01] | Congenital<br>[1.27] | Falls<br>[0.98] |
| Tameside              | Dermatitis<br>[1.52] | Neonatal<br>[0.91]   | Headaches<br>[0.83] | Asthma<br>[1.44]    | Anxiety<br>[1.0]  | Conduct<br>[0.91]    | Congenital<br>[1.21] | Depression<br>[1.0]  | Back Pain<br>[0.7]   | Iron<br>[1.98]  |
| Trafford              | Neonatal<br>[1.23]   | Dermatitis<br>[1.51] | Headaches<br>[0.87] | Asthma<br>[1.53]    | Anxiety<br>[0.96] | Conduct<br>[1.0]     | Back Pain<br>[0.87]  | Depression<br>[1.02] | Congenital<br>[1.28] | Falls<br>[0.9]  |
| Warrington            | Neonatal<br>[1.3]    | Dermatitis<br>[1.5]  | Headaches<br>[0.87] | Asthma<br>[1.52]    | Anxiety<br>[0.97] | Conduct<br>[0.98]    | Back Pain<br>[0.88]  | Depression<br>[1.04] | Congenital<br>[1.28] | Iron<br>[3.16]  |
| Wigan                 | Dermatitis<br>[1.51] | Neonatal<br>[1.1]    | Headaches<br>[0.86] | Asthma<br>[1.44]    | Anxiety<br>[1.02] | Conduct<br>[0.95]    | Back Pain<br>[0.9]   | Depression<br>[1.03] | Congenital<br>[1.21] | Iron<br>[2.18]  |
| Wirral                | Neonatal<br>[1.23]   | Dermatitis<br>[1.5]  | Headaches<br>[0.88] | Anxiety<br>[1.03]   | Asthma<br>[1.44]  | Conduct<br>[0.96]    | Congenital<br>[1.34] | Back Pain<br>[0.9]   | Depression<br>[1.06] | Falls<br>[1.1]  |
| SE England            | Dermatitis<br>[1.64] | Neonatal<br>[1.03]   | Headaches<br>[0.88] | Asthma<br>[1.6]     | Anxiety<br>[0.98] | Conduct<br>[0.97]    | Back Pain<br>[0.86]  | Depression<br>[1.04] | Congenital<br>[1.16] | Falls<br>[0.96] |
| Bracknell Forest      | Dermatitis<br>[1.52] | Headaches<br>[0.84]  | Neonatal<br>[0.82]  | Asthma<br>[1.47]    | Anxiety<br>[0.93] | Conduct<br>[0.95]    | Back Pain<br>[0.83]  | Depression<br>[0.99] | Congenital<br>[1.17] | Falls<br>[0.9]  |
| Brighton & Hove       | Dermatitis<br>[1.74] | Neonatal<br>[1.13]   | Headaches<br>[0.95] | Anxiety<br>[0.98]   | Asthma<br>[1.5]   | Conduct<br>[1.01]    | Back Pain<br>[0.92]  | Depression<br>[1.12] | Congenital<br>[1.21] | Acne<br>[1.31]  |
| Buckinghamshire       | Neonatal<br>[1.18]   | Dermatitis<br>[1.5]  | Headaches<br>[0.89] | Anxiety<br>[0.98]   | Asthma<br>[1.46]  | Conduct<br>[0.99]    | Back Pain<br>[0.88]  | Depression<br>[1.06] | Congenital<br>[1.17] | Falls<br>[0.94] |
| E Sussex              | Dermatitis<br>[1.73] | Neonatal<br>[1.08]   | Headaches<br>[0.91] | Anxiety<br>[1.04]   | Asthma<br>[1.37]  | Conduct<br>[0.98]    | Back Pain<br>[0.93]  | Depression<br>[1.1]  | Congenital<br>[1.12] | Falls<br>[1.09] |
| Hampshire             | Asthma<br>[2.23]     | Dermatitis<br>[1.49] | Neonatal<br>[1.01]  | Headaches<br>[0.89] | Anxiety<br>[0.99] | Conduct<br>[0.98]    | Back Pain<br>[0.88]  | Depression<br>[1.05] | Congenital<br>[1.15] | Falls<br>[0.98] |
| Isle of Wight         | Asthma<br>[2.19]     | Dermatitis<br>[1.44] | Neonatal<br>[0.93]  | Headaches<br>[0.93] | Anxiety<br>[1.05] | Conduct<br>[0.99]    | Back Pain<br>[0.95]  | Depression<br>[1.13] | Congenital<br>[1.1]  | Falls<br>[1.1]  |

**eFigure 9a. Leading ten causes of YLDs with the ratio of observed YLDs to YLDs expected on the basis of Socio-Demographic Index alone in 2017, <20 years, both sexes combined.** The top ten causes contributing to YLDs are listed globally, by socio-demographic quintile, and then by GBD superregion, region, country, and subnationally where modeled. For each cell, the ratio of observed YLDs to YLDs expected on the basis of socio-demographic index (SDI) alone are listed. Abbreviations: YLD=year of life lived with disability, GBD=Global Burden of Disease.

Values shown in brackets represent the ratio of observed YLDs to predicted YLDs on the basis of Socio-Demographic Index (SDI), rounded to two (2) digits. Color ranges (shown below) were calculated to place a roughly equal number of cells into each bin.

| COLOR KEY:           |                      | [0.0-0.78]           | [0.78-0.88]         | [0.88-0.94]         | [0.94-1.0]        | [1.0-1.06]          | [1.06-1.18]          | [1.18-1.38]          | [1.38-1.66]          | 1.66+                |
|----------------------|----------------------|----------------------|---------------------|---------------------|-------------------|---------------------|----------------------|----------------------|----------------------|----------------------|
|                      | 1                    | 2                    | 3                   | 4                   | 5                 | 6                   | 7                    | 8                    | 9                    | 10                   |
| Kent                 | Dermatitis<br>[1.73] | Neonatal<br>[0.99]   | Headaches<br>[0.89] | Anxiety<br>[1.01]   | Asthma<br>[1.41]  | Conduct<br>[0.97]   | Back Pain<br>[0.9]   | Depression<br>[1.07] | Congenital<br>[1.13] | Falls<br>[1.03]      |
| Medway               | Dermatitis<br>[1.5]  | Neonatal<br>[1.05]   | Headaches<br>[0.87] | Anxiety<br>[1.01]   | Asthma<br>[1.4]   | Conduct<br>[0.94]   | Back Pain<br>[0.88]  | Depression<br>[1.05] | Congenital<br>[1.11] | Falls<br>[1.09]      |
| Milton Keynes        | Dermatitis<br>[1.54] | Neonatal<br>[0.9]    | Headaches<br>[0.8]  | Asthma<br>[1.47]    | Anxiety<br>[0.92] | Conduct<br>[0.93]   | Back Pain<br>[0.79]  | Depression<br>[0.94] | Congenital<br>[1.16] | Falls<br>[0.92]      |
| Oxfordshire          | Dermatitis<br>[1.93] | Neonatal<br>[0.95]   | Headaches<br>[0.89] | Anxiety<br>[0.96]   | Asthma<br>[1.49]  | Conduct<br>[0.98]   | Back Pain<br>[0.87]  | Depression<br>[1.05] | Congenital<br>[1.18] | Falls<br>[0.89]      |
| Portsmouth           | Dermatitis<br>[1.5]  | Neonatal<br>[0.99]   | Headaches<br>[0.87] | Anxiety<br>[0.96]   | Asthma<br>[1.45]  | Conduct<br>[0.95]   | Back Pain<br>[0.86]  | Depression<br>[1.04] | Congenital<br>[1.14] | Falls<br>[0.93]      |
| Reading              | Dermatitis<br>[1.99] | Neonatal<br>[1.25]   | Headaches<br>[0.78] | Asthma<br>[1.5]     | Anxiety<br>[0.86] | Conduct<br>[0.9]    | Back Pain<br>[0.76]  | Congenital<br>[1.22] | Depression<br>[0.91] | URI<br>[1.27]        |
| Slough               | Dermatitis<br>[1.54] | Neonatal<br>[1.09]   | Asthma<br>[1.5]     | Headaches<br>[0.77] | Anxiety<br>[0.9]  | Conduct<br>[0.92]   | Back Pain<br>[0.76]  | Congenital<br>[1.16] | Depression<br>[0.9]  | URI<br>[1.27]        |
| Southampton          | Dermatitis<br>[1.5]  | Neonatal<br>[0.99]   | Headaches<br>[0.85] | Asthma<br>[1.44]    | Anxiety<br>[0.93] | Conduct<br>[0.92]   | Back Pain<br>[0.84]  | Depression<br>[1.01] | Congenital<br>[1.16] | Falls<br>[0.92]      |
| Surrey               | Dermatitis<br>[1.74] | Neonatal<br>[1.13]   | Headaches<br>[0.88] | Anxiety<br>[0.95]   | Asthma<br>[1.49]  | Conduct<br>[0.99]   | Depression<br>[1.03] | Back Pain<br>[0.79]  | Congenital<br>[1.19] | Falls<br>[0.88]      |
| West Berkshire       | Dermatitis<br>[1.5]  | Neonatal<br>[0.94]   | Headaches<br>[0.89] | Anxiety<br>[0.98]   | Asthma<br>[1.5]   | Conduct<br>[1.0]    | Back Pain<br>[0.88]  | Depression<br>[1.06] | Congenital<br>[1.17] | Falls<br>[0.93]      |
| W Sussex             | Dermatitis<br>[1.55] | Neonatal<br>[1.04]   | Asthma<br>[1.66]    | Headaches<br>[0.86] | Anxiety<br>[0.97] | Conduct<br>[0.97]   | Back Pain<br>[0.86]  | Depression<br>[1.03] | Congenital<br>[1.15] | Falls<br>[0.98]      |
| Windsor & Maidenhead | Dermatitis<br>[1.5]  | Neonatal<br>[0.99]   | Headaches<br>[0.89] | Anxiety<br>[0.96]   | Asthma<br>[1.52]  | Conduct<br>[1.02]   | Back Pain<br>[0.87]  | Depression<br>[1.04] | Congenital<br>[1.2]  | Falls<br>[0.87]      |
| Wokingham            | Dermatitis<br>[1.51] | Neonatal<br>[1.01]   | Headaches<br>[0.88] | Anxiety<br>[0.96]   | Asthma<br>[1.5]   | Conduct<br>[1.01]   | Back Pain<br>[0.86]  | Depression<br>[1.03] | Congenital<br>[1.2]  | Falls<br>[0.89]      |
| SW England           | Dermatitis<br>[1.49] | Neonatal<br>[1.07]   | Headaches<br>[0.89] | Anxiety<br>[1.0]    | Asthma<br>[1.44]  | Conduct<br>[0.97]   | Back Pain<br>[0.89]  | Depression<br>[1.06] | Congenital<br>[1.04] | Iron<br>[2.87]       |
| Bath & NE Somerset   | Neonatal<br>[1.43]   | Dermatitis<br>[1.46] | Headaches<br>[0.96] | Anxiety<br>[1.01]   | Asthma<br>[1.5]   | Back Pain<br>[0.96] | Conduct<br>[1.01]    | Depression<br>[1.15] | Congenital<br>[1.07] | Acne<br>[1.42]       |
| Bournemouth          | Dermatitis<br>[1.51] | Neonatal<br>[1.07]   | Headaches<br>[0.83] | Asthma<br>[1.43]    | Anxiety<br>[0.92] | Conduct<br>[0.9]    | Back Pain<br>[0.82]  | Depression<br>[0.99] | Iron<br>[3.7]        | Congenital<br>[1.07] |
| Bristol              | Neonatal<br>[1.25]   | Dermatitis<br>[1.52] | Headaches<br>[0.83] | Asthma<br>[1.49]    | Anxiety<br>[0.9]  | Conduct<br>[0.92]   | Back Pain<br>[0.81]  | Depression<br>[0.98] | Congenital<br>[1.1]  | URI<br>[1.27]        |
| Cornwall             | Dermatitis<br>[1.49] | Neonatal<br>[1.05]   | Headaches<br>[0.9]  | Anxiety<br>[1.03]   | Asthma<br>[1.41]  | Conduct<br>[0.96]   | Depression<br>[1.09] | Iron<br>[3.3]        | Back Pain<br>[0.86]  | Congenital<br>[1.03] |
| Devon                | Dermatitis<br>[1.48] | Neonatal<br>[0.96]   | Headaches<br>[0.91] | Anxiety<br>[1.02]   | Asthma<br>[1.43]  | Conduct<br>[0.99]   | Back Pain<br>[0.92]  | Depression<br>[1.1]  | Congenital<br>[1.04] | Falls<br>[1.04]      |
| Dorset               | Dermatitis<br>[1.47] | Neonatal<br>[1.03]   | Headaches<br>[0.93] | Anxiety<br>[1.06]   | Asthma<br>[1.45]  | Conduct<br>[1.01]   | Back Pain<br>[0.95]  | Depression<br>[1.12] | Congenital<br>[1.02] | Iron<br>[2.59]       |
| Gloucestershire      | Dermatitis<br>[1.49] | Neonatal<br>[0.99]   | Headaches<br>[0.9]  | Anxiety<br>[0.99]   | Asthma<br>[1.45]  | Conduct<br>[0.97]   | Back Pain<br>[0.9]   | Depression<br>[1.07] | Congenital<br>[1.05] | Falls<br>[0.97]      |
| N Somerset           | Neonatal<br>[1.15]   | Dermatitis<br>[1.5]  | Headaches<br>[0.87] | Anxiety<br>[1.0]    | Asthma<br>[1.43]  | Conduct<br>[0.96]   | Back Pain<br>[0.87]  | Depression<br>[1.05] | Congenital<br>[1.04] | Iron<br>[2.75]       |
| Plymouth             | Dermatitis<br>[1.5]  | Neonatal<br>[1.06]   | Headaches<br>[0.87] | Anxiety<br>[0.98]   | Asthma<br>[1.41]  | Conduct<br>[0.94]   | Back Pain<br>[0.87]  | Depression<br>[1.04] | Congenital<br>[1.04] | Falls<br>[1.0]       |
| Poole                | Dermatitis<br>[1.5]  | Neonatal<br>[1.05]   | Headaches<br>[0.87] | Anxiety<br>[0.99]   | Asthma<br>[1.44]  | Conduct<br>[0.96]   | Back Pain<br>[0.86]  | Depression<br>[1.03] | Congenital<br>[1.04] | Falls<br>[0.99]      |
| Somerset             | Dermatitis<br>[1.49] | Neonatal<br>[1.11]   | Headaches<br>[0.91] | Anxiety<br>[1.04]   | Asthma<br>[1.42]  | Conduct<br>[0.97]   | Back Pain<br>[0.93]  | Depression<br>[1.1]  | Congenital<br>[1.02] | Falls<br>[1.1]       |
| S Gloucestershire    | Dermatitis<br>[1.5]  | Neonatal<br>[1.13]   | Headaches<br>[0.88] | Anxiety<br>[0.97]   | Asthma<br>[1.48]  | Conduct<br>[0.97]   | Back Pain<br>[0.87]  | Depression<br>[1.04] | Congenital<br>[1.06] | Falls<br>[0.92]      |
| Swindon              | Dermatitis<br>[1.51] | Headaches<br>[0.83]  | Neonatal<br>[0.78]  | Asthma<br>[1.45]    | Anxiety<br>[0.95] | Conduct<br>[0.94]   | Back Pain<br>[0.84]  | Depression<br>[0.99] | Iron<br>[3.46]       | Congenital<br>[1.04] |
| Torbay               | Dermatitis<br>[1.5]  | Neonatal<br>[0.86]   | Headaches<br>[0.87] | Anxiety<br>[1.04]   | Asthma<br>[1.4]   | Conduct<br>[0.95]   | Back Pain<br>[0.9]   | Depression<br>[1.06] | Iron<br>[2.06]       | Congenital<br>[1.01] |
| Wiltshire            | Neonatal<br>[1.22]   | Dermatitis<br>[1.49] | Headaches<br>[0.89] | Anxiety<br>[1.02]   | Asthma<br>[1.43]  | Conduct<br>[0.97]   | Back Pain<br>[0.91]  | Depression<br>[1.07] | Iron<br>[3.31]       | Congenital<br>[1.03] |
| W Midlands           | Dermatitis<br>[1.5]  | Neonatal<br>[1.0]    | Headaches<br>[0.87] | Anxiety<br>[1.0]    | Asthma<br>[1.45]  | Conduct<br>[0.96]   | Back Pain<br>[0.88]  | Depression<br>[1.05] | Congenital<br>[1.11] | Falls<br>[1.05]      |
| Birmingham           | Dermatitis<br>[1.5]  | Neonatal<br>[0.98]   | Headaches<br>[0.86] | Anxiety<br>[0.98]   | Asthma<br>[1.45]  | Conduct<br>[0.95]   | Back Pain<br>[0.89]  | Depression<br>[1.03] | Congenital<br>[1.13] | Falls<br>[1.02]      |

**Figure 9a. Leading ten causes of YLDs with the ratio of observed YLDs to YLDs expected on the basis of Socio-Demographic Index alone in 2017, <20 years, both sexes combined.** The top ten causes contributing to YLDs are listed globally, by socio-demographic quintile, and then by GBD superregion, region, country, and subnationally where modeled. For each cell, the ratio of observed YLDs to YLDs expected on the basis of socio-demographic index (SDI) alone are listed. Abbreviations: YLD=year of life lived with disability, GBD=Global Burden of Disease.

Values shown in brackets represent the ratio of observed YLDs to predicted YLDs on the basis of Socio-Demographic Index (SDI), rounded to two (2) digits. Color ranges (shown below) were calculated to place a roughly equal number of cells into each bin.

| COLOR KEY:            |                      | [0.0-0.78]           | [0.78-0.88]         | [0.88-0.94]        | [0.94-1.0]         | [1.0-1.06]           | [1.06-1.18]          | [1.18-1.38]          | [1.38-1.66]          | 1.66+                |    |
|-----------------------|----------------------|----------------------|---------------------|--------------------|--------------------|----------------------|----------------------|----------------------|----------------------|----------------------|----|
|                       |                      | 1                    | 2                   | 3                  | 4                  | 5                    | 6                    | 7                    | 8                    | 9                    | 10 |
| Coventry              | Dermatitis<br>[1.51] | Neonatal<br>[0.96]   | Headaches<br>[0.85] | Asthma<br>[1.47]   | Anxiety<br>[0.95]  | Conduct<br>[0.93]    | Back Pain<br>[0.86]  | Depression<br>[1.01] | Congenital<br>[1.13] | Falls<br>[0.94]      |    |
| Dudley                | Dermatitis<br>[1.51] | Neonatal<br>[1.09]   | Headaches<br>[0.87] | Anxiety<br>[1.03]  | Asthma<br>[1.43]   | Conduct<br>[0.95]    | Back Pain<br>[0.91]  | Depression<br>[1.05] | Congenital<br>[1.08] | Falls<br>[1.14]      |    |
| Herefordshire         | Dermatitis<br>[1.49] | Neonatal<br>[1.03]   | Headaches<br>[0.9]  | Anxiety<br>[1.02]  | Asthma<br>[1.45]   | Conduct<br>[0.97]    | Back Pain<br>[0.92]  | Depression<br>[1.07] | Congenital<br>[1.1]  | Iron<br>[2.68]       |    |
| Sandwell              | Dermatitis<br>[1.52] | Neonatal<br>[1.08]   | Headaches<br>[0.81] | Asthma<br>[1.44]   | Anxiety<br>[0.99]  | Conduct<br>[0.92]    | Back Pain<br>[0.86]  | Depression<br>[0.98] | Congenital<br>[1.08] | Iron<br>[1.87]       |    |
| Shropshire            | Dermatitis<br>[1.48] | Neonatal<br>[0.99]   | Headaches<br>[0.94] | Anxiety<br>[1.05]  | Asthma<br>[1.46]   | Conduct<br>[1.0]     | Back Pain<br>[0.97]  | Depression<br>[1.13] | Congenital<br>[1.1]  | Falls<br>[1.05]      |    |
| Solihull              | Dermatitis<br>[1.49] | Headaches<br>[0.89]  | Anxiety<br>[0.99]   | Asthma<br>[1.48]   | Neonatal<br>[0.73] | Conduct<br>[0.99]    | Back Pain<br>[0.9]   | Depression<br>[1.06] | Congenital<br>[1.13] | Falls<br>[0.99]      |    |
| Staffordshire         | Dermatitis<br>[1.49] | Neonatal<br>[0.97]   | Headaches<br>[0.9]  | Anxiety<br>[1.03]  | Asthma<br>[1.45]   | Conduct<br>[0.99]    | Depression<br>[1.09] | Back Pain<br>[0.83]  | Congenital<br>[1.1]  | Iron<br>[2.76]       |    |
| Stoke-on-Trent        | Neonatal<br>[1.18]   | Dermatitis<br>[1.52] | Headaches<br>[0.84] | Asthma<br>[1.42]   | Anxiety<br>[1.0]   | Conduct<br>[0.93]    | Depression<br>[1.01] | Back Pain<br>[0.78]  | Congenital<br>[1.09] | Falls<br>[1.14]      |    |
| Telford & Wrekin      | Dermatitis<br>[1.51] | Neonatal<br>[1.0]    | Headaches<br>[0.87] | Anxiety<br>[1.01]  | Asthma<br>[1.45]   | Conduct<br>[0.94]    | Back Pain<br>[0.9]   | Depression<br>[1.04] | Congenital<br>[1.09] | Falls<br>[1.06]      |    |
| Walsall               | Dermatitis<br>[1.52] | Neonatal<br>[1.0]    | Headaches<br>[0.86] | Asthma<br>[1.43]   | Anxiety<br>[1.03]  | Conduct<br>[0.94]    | Back Pain<br>[0.91]  | Depression<br>[1.04] | Congenital<br>[1.08] | Iron<br>[2.1]        |    |
| Warwickshire          | Dermatitis<br>[1.5]  | Neonatal<br>[1.02]   | Headaches<br>[0.88] | Anxiety<br>[0.98]  | Asthma<br>[1.49]   | Conduct<br>[0.98]    | Back Pain<br>[0.89]  | Depression<br>[1.05] | Congenital<br>[1.13] | Falls<br>[0.97]      |    |
| Wolverhampton         | Dermatitis<br>[1.52] | Headaches<br>[0.85]  | Asthma<br>[1.42]    | Neonatal<br>[0.73] | Anxiety<br>[0.99]  | Conduct<br>[0.93]    | Back Pain<br>[0.88]  | Depression<br>[1.02] | Congenital<br>[1.09] | Iron<br>[2.16]       |    |
| Worcestershire        | Dermatitis<br>[1.49] | Neonatal<br>[1.12]   | Headaches<br>[0.9]  | Anxiety<br>[1.02]  | Asthma<br>[1.45]   | Conduct<br>[0.98]    | Back Pain<br>[0.92]  | Depression<br>[1.08] | Congenital<br>[1.11] | Falls<br>[1.04]      |    |
| Yorkshire & Humber    | Dermatitis<br>[1.5]  | Neonatal<br>[0.94]   | Headaches<br>[0.87] | Asthma<br>[1.47]   | Anxiety<br>[0.99]  | Conduct<br>[0.95]    | Back Pain<br>[0.89]  | Depression<br>[1.04] | Congenital<br>[1.11] | Iron<br>[2.59]       |    |
| Barnsley              | Dermatitis<br>[1.52] | Neonatal<br>[0.99]   | Headaches<br>[0.85] | Asthma<br>[1.45]   | Anxiety<br>[1.03]  | Conduct<br>[0.92]    | Back Pain<br>[0.9]   | Depression<br>[1.03] | Iron<br>[2.17]       | Congenital<br>[1.07] |    |
| Bradford              | Dermatitis<br>[1.51] | Neonatal<br>[1.04]   | Headaches<br>[0.85] | Asthma<br>[1.45]   | Anxiety<br>[1.01]  | Conduct<br>[0.94]    | Back Pain<br>[0.89]  | Depression<br>[1.02] | Congenital<br>[1.1]  | Iron<br>[2.21]       |    |
| Calderdale            | Dermatitis<br>[1.51] | Neonatal<br>[0.91]   | Headaches<br>[0.87] | Asthma<br>[1.47]   | Anxiety<br>[1.0]   | Conduct<br>[0.95]    | Back Pain<br>[0.9]   | Depression<br>[1.04] | Congenital<br>[1.1]  | Falls<br>[1.03]      |    |
| Doncaster             | Neonatal<br>[1.21]   | Dermatitis<br>[1.52] | Headaches<br>[0.85] | Asthma<br>[1.45]   | Anxiety<br>[1.03]  | Conduct<br>[0.93]    | Back Pain<br>[0.9]   | Depression<br>[1.03] | Congenital<br>[1.08] | Falls<br>[1.14]      |    |
| E Riding of Yorkshire | Dermatitis<br>[1.48] | Neonatal<br>[0.92]   | Headaches<br>[0.93] | Anxiety<br>[1.05]  | Asthma<br>[1.48]   | Conduct<br>[0.99]    | Back Pain<br>[0.96]  | Depression<br>[1.12] | Congenital<br>[1.09] | Falls<br>[1.08]      |    |
| Kingston upon Hull    | Dermatitis<br>[1.53] | Neonatal<br>[0.87]   | Headaches<br>[0.8]  | Asthma<br>[1.46]   | Anxiety<br>[0.95]  | Conduct<br>[0.9]     | Back Pain<br>[0.82]  | Depression<br>[0.96] | Congenital<br>[1.1]  | Falls<br>[1.03]      |    |
| Kirklees              | Dermatitis<br>[1.51] | Neonatal<br>[0.88]   | Headaches<br>[0.87] | Anxiety<br>[1.01]  | Asthma<br>[1.45]   | Conduct<br>[0.94]    | Back Pain<br>[0.9]   | Depression<br>[1.04] | Congenital<br>[1.1]  | Iron<br>[2.46]       |    |
| Leeds                 | Dermatitis<br>[1.52] | Neonatal<br>[0.87]   | Headaches<br>[0.84] | Asthma<br>[1.5]    | Anxiety<br>[0.92]  | Conduct<br>[0.93]    | Back Pain<br>[0.84]  | Depression<br>[0.99] | Congenital<br>[1.16] | Falls<br>[0.88]      |    |
| NE Lincolnshire       | Dermatitis<br>[1.52] | Neonatal<br>[0.9]    | Headaches<br>[0.84] | Asthma<br>[1.47]   | Anxiety<br>[1.0]   | Conduct<br>[0.93]    | Back Pain<br>[0.86]  | Depression<br>[1.01] | Congenital<br>[1.09] | Iron<br>[2.31]       |    |
| N Lincolnshire        | Dermatitis<br>[1.51] | Neonatal<br>[0.83]   | Headaches<br>[0.86] | Asthma<br>[1.47]   | Anxiety<br>[1.01]  | Conduct<br>[0.95]    | Back Pain<br>[0.89]  | Depression<br>[1.03] | Congenital<br>[1.08] | Iron<br>[2.6]        |    |
| N Yorkshire           | Dermatitis<br>[1.48] | Neonatal<br>[1.06]   | Headaches<br>[0.9]  | Anxiety<br>[1.02]  | Asthma<br>[1.48]   | Conduct<br>[1.0]     | Back Pain<br>[0.93]  | Depression<br>[1.08] | Congenital<br>[1.12] | Iron<br>[2.81]       |    |
| Rotherham             | Dermatitis<br>[1.51] | Neonatal<br>[0.84]   | Headaches<br>[0.87] | Asthma<br>[1.46]   | Anxiety<br>[1.03]  | Conduct<br>[0.94]    | Back Pain<br>[0.91]  | Depression<br>[1.05] | Congenital<br>[1.08] | Iron<br>[2.09]       |    |
| Sheffield             | Dermatitis<br>[1.49] | Neonatal<br>[0.99]   | Headaches<br>[0.9]  | Anxiety<br>[0.98]  | Asthma<br>[1.49]   | Conduct<br>[0.96]    | Back Pain<br>[0.91]  | Depression<br>[1.08] | Congenital<br>[1.14] | Falls<br>[0.95]      |    |
| Wakefield             | Dermatitis<br>[1.51] | Headaches<br>[0.85]  | Asthma<br>[1.47]    | Neonatal<br>[0.75] | Anxiety<br>[1.01]  | Conduct<br>[0.93]    | Back Pain<br>[0.89]  | Depression<br>[1.02] | Congenital<br>[1.08] | Iron<br>[2.43]       |    |
| York                  | Dermatitis<br>[1.48] | Headaches<br>[0.93]  | Neonatal<br>[0.87]  | Anxiety<br>[0.98]  | Asthma<br>[1.54]   | Back Pain<br>[0.92]  | Conduct<br>[0.98]    | Depression<br>[1.11] | Congenital<br>[1.16] | Acne<br>[1.3]        |    |
| N Ireland             | Anxiety<br>[1.61]    | Dermatitis<br>[1.25] | Headaches<br>[0.95] | Neonatal<br>[0.86] | Asthma<br>[1.29]   | Depression<br>[1.17] | Back Pain<br>[0.93]  | Conduct<br>[0.81]    | Congenital<br>[1.04] | Falls<br>[0.96]      |    |
| Scotland              | Dermatitis<br>[1.35] | Headaches<br>[0.96]  | Anxiety<br>[1.12]   | Neonatal<br>[0.81] | Asthma<br>[1.45]   | Depression<br>[1.15] | Conduct<br>[0.91]    | Back Pain<br>[0.91]  | Congenital<br>[1.24] | Iron<br>[2.7]        |    |

**eFigure 9a. Leading ten causes of YLDs with the ratio of observed YLDs to YLDs expected on the basis of Socio-Demographic Index alone in 2017, <20 years, both sexes combined.** The top ten causes contributing to YLDs are listed globally, by socio-demographic quintile, and then by GBD superregion, region, country, and subnationally where modeled. For each cell, the ratio of observed YLDs to YLDs expected on the basis of socio-demographic index (SDI) alone are listed. Abbreviations: YLD=year of life lived with disability, GBD=Global Burden of Disease.

Values shown in brackets represent the ratio of observed YLDs to predicted YLDs on the basis of Socio-Demographic Index (SDI), rounded to two (2) digits. Color ranges (shown below) were calculated to place a roughly equal number of cells into each bin.

| COLOR KEY:                  |                      | [0.0-0.78]            | [0.78-0.88]          | [0.88-0.94]          | [0.94-1.0]           | [1.0-1.06]           | [1.06-1.18]           | [1.18-1.38]          | [1.38-1.66]          | 1.66+                |
|-----------------------------|----------------------|-----------------------|----------------------|----------------------|----------------------|----------------------|-----------------------|----------------------|----------------------|----------------------|
|                             | 1                    | 2                     | 3                    | 4                    | 5                    | 6                    | 7                     | 8                    | 9                    | 10                   |
| Wales                       | Dermatitis<br>[1.25] | Headaches<br>[0.97]   | Neonatal<br>[0.83]   | Anxiety<br>[1.11]    | Asthma<br>[1.29]     | Depression<br>[1.2]  | Conduct<br>[0.89]     | Back Pain<br>[0.77]  | Congenital<br>[1.04] | Falls<br>[1.25]      |
| Latin America and Caribbean | Neonatal<br>[1.16]   | Headaches<br>[1.19]   | Asthma<br>[1.26]     | Back Pain<br>[1.29]  | Dermatitis<br>[0.89] | Iron<br>[0.86]       | Conduct<br>[0.92]     | Anxiety<br>[0.92]    | Depression<br>[0.95] | Diarrhea<br>[1.33]   |
| Andean Latin America        | Neonatal<br>[1.13]   | Dermatitis<br>[1.45]  | Headaches<br>[1.08]  | Iron<br>[1.28]       | Asthma<br>[1.6]      | Conduct<br>[0.86]    | Back Pain<br>[1.02]   | Anxiety<br>[0.9]     | Diarrhea<br>[1.39]   | Vit A<br>[0.86]      |
| Bolivia                     | Iron<br>[1.71]       | Neonatal<br>[1.1]     | Asthma<br>[1.84]     | Dermatitis<br>[1.54] | Headaches<br>[1.1]   | Diarrhea<br>[1.47]   | Back Pain<br>[1.12]   | Conduct<br>[0.84]    | Anxiety<br>[0.93]    | Vit A<br>[0.77]      |
| Ecuador                     | Headaches<br>[1.38]  | Neonatal<br>[1.12]    | Dermatitis<br>[1.27] | Asthma<br>[1.44]     | Conduct<br>[0.92]    | Anxiety<br>[0.97]    | Back Pain<br>[1.03]   | Depression<br>[0.99] | Epilepsy<br>[1.4]    | Diarrhea<br>[1.27]   |
| Peru                        | Neonatal<br>[1.14]   | Iron<br>[1.53]        | Dermatitis<br>[1.53] | Asthma<br>[1.6]      | Headaches<br>[0.92]  | Conduct<br>[0.84]    | Back Pain<br>[0.98]   | Anxiety<br>[0.87]    | Diarrhea<br>[1.39]   | Vit A<br>[1.05]      |
| Caribbean                   | Iron<br>[1.94]       | Headaches<br>[1.16]   | Neonatal<br>[0.95]   | Asthma<br>[1.76]     | Dermatitis<br>[1.1]  | Anxiety<br>[1.04]    | Disaster<br>[1034.02] | Conduct<br>[0.83]    | Vit A<br>[1.14]      | Depression<br>[0.96] |
| Antigua                     | Iron<br>[4.88]       | Headaches<br>[1.2]    | Asthma<br>[1.87]     | Neonatal<br>[0.96]   | Dermatitis<br>[1.01] | Anxiety<br>[1.0]     | Conduct<br>[0.88]     | Back Pain<br>[0.79]  | Depression<br>[0.88] | Epilepsy<br>[1.21]   |
| Bahamas                     | Headaches<br>[1.21]  | Asthma<br>[1.97]      | Neonatal<br>[0.96]   | Dermatitis<br>[1.0]  | Anxiety<br>[0.97]    | Conduct<br>[0.9]     | Back Pain<br>[0.76]   | Depression<br>[0.87] | Iron<br>[1.28]       | Diarrhea<br>[1.37]   |
| Barbados                    | Headaches<br>[1.21]  | Neonatal<br>[1.03]    | Asthma<br>[1.73]     | Dermatitis<br>[0.98] | Anxiety<br>[0.99]    | Conduct<br>[0.9]     | Depression<br>[0.93]  | Back Pain<br>[0.79]  | Iron<br>[1.07]       | Diarrhea<br>[1.23]   |
| Belize                      | Iron<br>[1.49]       | Headaches<br>[1.26]   | Asthma<br>[1.91]     | Neonatal<br>[1.0]    | Dermatitis<br>[1.14] | Anxiety<br>[1.15]    | Conduct<br>[0.89]     | Depression<br>[1.01] | Back Pain<br>[0.9]   | Epilepsy<br>[0.97]   |
| Bermuda                     | Asthma<br>[2.32]     | Headaches<br>[1.15]   | Neonatal<br>[0.99]   | Dermatitis<br>[1.0]  | Anxiety<br>[0.88]    | Conduct<br>[0.88]    | Depression<br>[0.86]  | Back Pain<br>[0.71]  | Diarrhea<br>[1.69]   | Congenital<br>[0.69] |
| Cuba                        | Headaches<br>[1.18]  | Asthma<br>[1.95]      | Neonatal<br>[0.92]   | Dermatitis<br>[1.05] | Iron<br>[1.36]       | Anxiety<br>[1.01]    | Conduct<br>[0.86]     | Depression<br>[0.95] | Back Pain<br>[0.67]  | Congenital<br>[0.67] |
| Dominica                    | Headaches<br>[1.26]  | Neonatal<br>[1.08]    | Iron<br>[2.18]       | Asthma<br>[1.8]      | Dermatitis<br>[1.03] | Anxiety<br>[1.08]    | Conduct<br>[0.92]     | Back Pain<br>[0.87]  | Depression<br>[0.94] | Epilepsy<br>[1.44]   |
| Dominican Rep               | Neonatal<br>[1.02]   | Headaches<br>[1.22]   | Iron<br>[1.02]       | Asthma<br>[1.39]     | Dermatitis<br>[1.14] | Anxiety<br>[1.12]    | Diarrhea<br>[1.44]    | Conduct<br>[0.85]    | Depression<br>[1.04] | Back Pain<br>[0.89]  |
| Grenada                     | Neonatal<br>[1.04]   | Headaches<br>[1.21]   | Asthma<br>[1.76]     | Iron<br>[1.12]       | Dermatitis<br>[1.09] | Anxiety<br>[1.08]    | Conduct<br>[0.88]     | Diarrhea<br>[1.4]    | Depression<br>[0.96] | Back Pain<br>[0.84]  |
| Guyana                      | Neonatal<br>[1.07]   | Iron<br>[1.18]        | Headaches<br>[1.23]  | Asthma<br>[1.78]     | Dermatitis<br>[1.15] | Depression<br>[1.45] | Anxiety<br>[1.13]     | Conduct<br>[0.85]    | Back Pain<br>[0.89]  | Vit A<br>[0.64]      |
| Haiti                       | Iron<br>[1.39]       | Disaster<br>[1107.76] | Asthma<br>[1.83]     | Headaches<br>[1.29]  | Vit A<br>[0.81]      | Neonatal<br>[1.0]    | Dermatitis<br>[1.16]  | Diarrhea<br>[1.11]   | Anxiety<br>[1.15]    | Conduct<br>[0.84]    |
| Jamaica                     | Headaches<br>[1.25]  | Neonatal<br>[1.02]    | Asthma<br>[1.85]     | Iron<br>[1.64]       | Dermatitis<br>[1.04] | Anxiety<br>[1.07]    | Conduct<br>[0.89]     | Back Pain<br>[0.87]  | Depression<br>[0.94] | Epilepsy<br>[1.25]   |
| Puerto Rico                 | Asthma<br>[2.74]     | Headaches<br>[1.25]   | Neonatal<br>[1.04]   | Dermatitis<br>[0.96] | Anxiety<br>[0.94]    | Conduct<br>[0.94]    | Back Pain<br>[0.75]   | Depression<br>[0.84] | Acne<br>[1.32]       | Diarrhea<br>[1.63]   |
| St Lucia                    | Headaches<br>[1.25]  | Neonatal<br>[1.06]    | Asthma<br>[1.84]     | Dermatitis<br>[1.07] | Anxiety<br>[1.09]    | Iron<br>[0.99]       | Conduct<br>[0.89]     | Depression<br>[1.01] | Back Pain<br>[0.87]  | Diarrhea<br>[1.33]   |
| St Vincent                  | Headaches<br>[1.24]  | Neonatal<br>[1.01]    | Asthma<br>[1.82]     | Iron<br>[1.13]       | Dermatitis<br>[1.13] | Anxiety<br>[1.13]    | Conduct<br>[0.88]     | Depression<br>[1.02] | Back Pain<br>[0.88]  | Vit A<br>[0.8]       |
| Suriname                    | Asthma<br>[1.96]     | Neonatal<br>[1.02]    | Headaches<br>[1.16]  | Iron<br>[1.14]       | Dermatitis<br>[1.1]  | Anxiety<br>[1.04]    | Depression<br>[1.28]  | Conduct<br>[0.85]    | Back Pain<br>[0.78]  | Epilepsy<br>[1.1]    |
| Trinidad Tobago             | Asthma<br>[2.07]     | Neonatal<br>[1.05]    | Headaches<br>[1.11]  | Dermatitis<br>[1.07] | Anxiety<br>[0.95]    | Conduct<br>[0.83]    | Depression<br>[1.01]  | Back Pain<br>[0.74]  | Iron<br>[0.88]       | Congenital<br>[0.69] |
| Virgin Isl US               | Asthma<br>[2.08]     | Headaches<br>[1.12]   | Neonatal<br>[1.02]   | Dermatitis<br>[1.0]  | Anxiety<br>[0.86]    | Conduct<br>[0.87]    | Depression<br>[0.86]  | Back Pain<br>[0.69]  | Diarrhea<br>[2.05]   | Epilepsy<br>[1.36]   |
| Central Latin America       | Neonatal<br>[1.38]   | Headaches<br>[1.0]    | Conduct<br>[0.95]    | Dermatitis<br>[0.83] | Asthma<br>[0.94]     | Epilepsy<br>[1.64]   | Diarrhea<br>[1.47]    | Back Pain<br>[0.81]  | Anxiety<br>[0.68]    | Depression<br>[0.74] |
| Colombia                    | Neonatal<br>[1.38]   | Headaches<br>[1.08]   | Dermatitis<br>[0.93] | Conduct<br>[0.95]    | Back Pain<br>[1.13]  | Asthma<br>[0.97]     | Diarrhea<br>[1.54]    | Epilepsy<br>[1.68]   | Anxiety<br>[0.61]    | Congenital<br>[0.7]  |
| Costa Rica                  | Neonatal<br>[1.28]   | Headaches<br>[1.03]   | Asthma<br>[1.37]     | Conduct<br>[0.94]    | Dermatitis<br>[0.87] | Diarrhea<br>[1.76]   | Back Pain<br>[0.87]   | Epilepsy<br>[1.54]   | Anxiety<br>[0.67]    | Iron<br>[0.67]       |
| El Salvador                 | Neonatal<br>[1.37]   | Headaches<br>[1.1]    | Asthma<br>[1.24]     | Iron<br>[0.71]       | Conduct<br>[0.97]    | Diarrhea<br>[1.47]   | Dermatitis<br>[0.85]  | Back Pain<br>[0.99]  | Depression<br>[1.01] | Epilepsy<br>[1.39]   |
| Guatemala                   | Neonatal<br>[1.4]    | Headaches<br>[1.09]   | Diarrhea<br>[1.79]   | Iron<br>[0.6]        | Dermatitis<br>[1.04] | Conduct<br>[0.95]    | Back Pain<br>[1.11]   | Asthma<br>[0.84]     | Depression<br>[0.97] | Anxiety<br>[0.74]    |
| Honduras                    | Neonatal<br>[1.53]   | Headaches<br>[1.1]    | Iron<br>[0.66]       | Diarrhea<br>[1.66]   | Asthma<br>[1.22]     | Dermatitis<br>[1.05] | Conduct<br>[0.94]     | Epilepsy<br>[1.52]   | Back Pain<br>[1.01]  | Vit A<br>[0.5]       |

**eFigure 9a. Leading ten causes of YLDs with the ratio of observed YLDs to YLDs expected on the basis of Socio-Demographic Index alone in 2017, <20 years, both sexes combined.** The top ten causes contributing to YLDs are listed globally, by socio-demographic quintile, and then by GBD superregion, region, country, and subnationally where modeled. For each cell, the ratio of observed YLDs to YLDs expected on the basis of socio-demographic index (SDI) alone are listed. Abbreviations: YLD=year of life lived with disability, GBD=Global Burden of Disease.

Values shown in brackets represent the ratio of observed YLDs to predicted YLDs on the basis of Socio-Demographic Index (SDI), rounded to two (2) digits. Color ranges (shown below) were calculated to place a roughly equal number of cells into each bin.

| COLOR KEY:      |                    | [0.0-0.78]          | [0.78-0.88]        | [0.88-0.94]         | [0.94-1.0]           | [1.0-1.06]           | [1.06-1.18]          | [1.18-1.38]          | [1.38-1.66]          | 1.66+                |
|-----------------|--------------------|---------------------|--------------------|---------------------|----------------------|----------------------|----------------------|----------------------|----------------------|----------------------|
|                 | 1                  | 2                   | 3                  | 4                   | 5                    | 6                    | 7                    | 8                    | 9                    | 10                   |
| Mexico          | Neonatal<br>[1.39] | Headaches<br>[0.97] | Conduct<br>[0.97]  | Epilepsy<br>[1.79]  | Asthma<br>[0.86]     | Dermatitis<br>[0.67] | Anxiety<br>[0.71]    | Vit A<br>[0.89]      | Congenital<br>[0.78] | Back Pain<br>[0.65]  |
| Aguascalientes  | Neonatal<br>[1.39] | Headaches<br>[0.97] | Conduct<br>[0.98]  | Epilepsy<br>[1.91]  | Asthma<br>[0.95]     | Dermatitis<br>[0.66] | Anxiety<br>[0.69]    | Congenital<br>[0.83] | Back Pain<br>[0.67]  | Depression<br>[0.71] |
| Baja CA         | Neonatal<br>[1.36] | Headaches<br>[0.99] | Conduct<br>[1.0]   | Epilepsy<br>[1.85]  | Dermatitis<br>[0.66] | Asthma<br>[0.79]     | Anxiety<br>[0.71]    | Vit A<br>[1.05]      | Back Pain<br>[0.68]  | Congenital<br>[0.78] |
| Baja CA Sur     | Neonatal<br>[1.44] | Headaches<br>[0.97] | Conduct<br>[0.99]  | Epilepsy<br>[1.88]  | Asthma<br>[0.92]     | Dermatitis<br>[0.66] | Anxiety<br>[0.69]    | Vit A<br>[1.11]      | Congenital<br>[0.8]  | Back Pain<br>[0.65]  |
| Campeche        | Neonatal<br>[1.52] | Headaches<br>[0.96] | Conduct<br>[0.96]  | Epilepsy<br>[1.66]  | Asthma<br>[0.87]     | Dermatitis<br>[0.7]  | Vit A<br>[0.95]      | Iron<br>[0.55]       | Anxiety<br>[0.71]    | Depression<br>[0.82] |
| Chiapas         | Neonatal<br>[1.43] | Headaches<br>[1.0]  | Conduct<br>[0.97]  | Epilepsy<br>[1.59]  | Vit A<br>[0.75]      | Asthma<br>[0.86]     | Dermatitis<br>[0.72] | Diarrhea<br>[1.05]   | Anxiety<br>[0.75]    | Back Pain<br>[0.71]  |
| Chihuahua       | Neonatal<br>[1.28] | Headaches<br>[1.0]  | Conduct<br>[1.0]   | Epilepsy<br>[1.83]  | Asthma<br>[0.97]     | Anxiety<br>[0.72]    | Dermatitis<br>[0.57] | Congenital<br>[0.85] | Back Pain<br>[0.7]   | Depression<br>[0.77] |
| Coahuila        | Neonatal<br>[1.18] | Headaches<br>[0.97] | Conduct<br>[0.97]  | Epilepsy<br>[1.83]  | Asthma<br>[0.96]     | Dermatitis<br>[0.67] | Diarrhea<br>[1.29]   | Anxiety<br>[0.69]    | Back Pain<br>[0.67]  | Congenital<br>[0.76] |
| Colima          | Neonatal<br>[1.47] | Headaches<br>[0.97] | Conduct<br>[0.98]  | Epilepsy<br>[1.89]  | Asthma<br>[0.89]     | Dermatitis<br>[0.67] | Anxiety<br>[0.69]    | Vit A<br>[0.97]      | Back Pain<br>[0.66]  | Depression<br>[0.71] |
| Mexico City     | Neonatal<br>[1.48] | Headaches<br>[0.95] | Conduct<br>[0.94]  | Epilepsy<br>[2.26]  | Dermatitis<br>[0.82] | Asthma<br>[0.78]     | Anxiety<br>[0.61]    | Congenital<br>[0.83] | Back Pain<br>[0.64]  | Depression<br>[0.72] |
| Durango         | Neonatal<br>[1.24] | Headaches<br>[0.97] | Conduct<br>[0.97]  | Dermatitis<br>[0.9] | Epilepsy<br>[1.76]   | Asthma<br>[0.95]     | Anxiety<br>[0.71]    | Vit A<br>[0.86]      | Back Pain<br>[0.68]  | Congenital<br>[0.78] |
| Guanajuato      | Neonatal<br>[1.26] | Headaches<br>[0.98] | Conduct<br>[0.98]  | Epilepsy<br>[1.79]  | Asthma<br>[0.93]     | Vit A<br>[1.03]      | Dermatitis<br>[0.69] | Anxiety<br>[0.72]    | Back Pain<br>[0.69]  | Depression<br>[0.76] |
| Guerrero        | Neonatal<br>[1.48] | Headaches<br>[1.01] | Conduct<br>[0.98]  | Epilepsy<br>[1.59]  | Asthma<br>[0.87]     | Dermatitis<br>[0.72] | Vit A<br>[0.67]      | Anxiety<br>[0.75]    | Back Pain<br>[0.71]  | Congenital<br>[0.74] |
| Hidalgo         | Neonatal<br>[1.71] | Headaches<br>[1.0]  | Conduct<br>[0.99]  | Epilepsy<br>[1.67]  | Asthma<br>[0.91]     | Dermatitis<br>[0.71] | Anxiety<br>[0.75]    | Back Pain<br>[0.71]  | Vit A<br>[0.62]      | Congenital<br>[0.75] |
| Jalisco         | Neonatal<br>[1.34] | Headaches<br>[0.96] | Epilepsy<br>[2.17] | Conduct<br>[0.97]   | Dermatitis<br>[0.67] | Asthma<br>[0.78]     | Anxiety<br>[0.69]    | Congenital<br>[0.83] | Back Pain<br>[0.66]  | Depression<br>[0.74] |
| Mexico          | Neonatal<br>[1.64] | Headaches<br>[0.93] | Conduct<br>[0.98]  | Epilepsy<br>[1.78]  | Asthma<br>[0.78]     | Anxiety<br>[0.71]    | Vit A<br>[0.96]      | Dermatitis<br>[0.59] | Depression<br>[0.7]  | Congenital<br>[0.71] |
| Michoacan       | Neonatal<br>[1.2]  | Headaches<br>[0.98] | Conduct<br>[0.97]  | Epilepsy<br>[1.6]   | Asthma<br>[0.91]     | Dermatitis<br>[0.72] | Anxiety<br>[0.74]    | Vit A<br>[0.71]      | Back Pain<br>[0.7]   | Congenital<br>[0.75] |
| Morelos         | Neonatal<br>[1.36] | Headaches<br>[0.97] | Conduct<br>[0.97]  | Epilepsy<br>[1.83]  | Asthma<br>[0.82]     | Anxiety<br>[0.7]     | Dermatitis<br>[0.58] | Congenital<br>[0.84] | Vit A<br>[0.81]      | Depression<br>[0.69] |
| Nayarit         | Neonatal<br>[1.49] | Headaches<br>[0.96] | Conduct<br>[0.97]  | Epilepsy<br>[1.7]   | Asthma<br>[0.89]     | Dermatitis<br>[0.69] | Anxiety<br>[0.71]    | Congenital<br>[0.8]  | Vit A<br>[0.76]      | Back Pain<br>[0.67]  |
| Nuevo Leon      | Neonatal<br>[1.13] | Headaches<br>[0.95] | Conduct<br>[0.96]  | Epilepsy<br>[1.96]  | Asthma<br>[0.78]     | Anxiety<br>[0.66]    | Vit A<br>[1.18]      | Dermatitis<br>[0.57] | Back Pain<br>[0.65]  | Congenital<br>[0.79] |
| Oaxaca          | Neonatal<br>[1.4]  | Headaches<br>[1.02] | Conduct<br>[0.99]  | Epilepsy<br>[1.68]  | Asthma<br>[0.88]     | Dermatitis<br>[0.72] | Anxiety<br>[0.76]    | Congenital<br>[0.81] | Back Pain<br>[0.72]  | Diarrhea<br>[0.86]   |
| Puebla          | Neonatal<br>[1.31] | Headaches<br>[0.99] | Conduct<br>[0.97]  | Asthma<br>[0.9]     | Dermatitis<br>[0.71] | Anxiety<br>[0.74]    | Epilepsy<br>[1.24]   | Back Pain<br>[0.71]  | Vit A<br>[0.62]      | Congenital<br>[0.77] |
| Queretaro       | Neonatal<br>[1.46] | Headaches<br>[0.96] | Conduct<br>[0.97]  | Epilepsy<br>[1.81]  | Asthma<br>[0.93]     | Dermatitis<br>[0.68] | Anxiety<br>[0.69]    | Back Pain<br>[0.66]  | Congenital<br>[0.77] | Depression<br>[0.7]  |
| Quintana Roo    | Neonatal<br>[1.76] | Headaches<br>[0.96] | Conduct<br>[0.97]  | Epilepsy<br>[1.79]  | Vit A<br>[1.07]      | Asthma<br>[0.86]     | Dermatitis<br>[0.69] | Diarrhea<br>[1.27]   | Anxiety<br>[0.7]     | Depression<br>[0.81] |
| San Luis Potosi | Neonatal<br>[1.2]  | Headaches<br>[0.99] | Conduct<br>[0.99]  | Epilepsy<br>[1.77]  | Asthma<br>[0.92]     | Dermatitis<br>[0.69] | Vit A<br>[0.93]      | Anxiety<br>[0.72]    | Congenital<br>[0.84] | Back Pain<br>[0.69]  |
| Sinaloa         | Neonatal<br>[1.26] | Headaches<br>[0.97] | Conduct<br>[0.98]  | Epilepsy<br>[1.8]   | Asthma<br>[0.89]     | Vit A<br>[1.17]      | Dermatitis<br>[0.67] | Anxiety<br>[0.7]     | Back Pain<br>[0.66]  | Congenital<br>[0.75] |
| Sonora          | Neonatal<br>[1.23] | Headaches<br>[0.98] | Conduct<br>[0.99]  | Epilepsy<br>[1.89]  | Asthma<br>[0.93]     | Dermatitis<br>[0.67] | Vit A<br>[1.09]      | Anxiety<br>[0.7]     | Congenital<br>[0.84] | Back Pain<br>[0.68]  |
| Tabasco         | Neonatal<br>[1.5]  | Headaches<br>[0.98] | Conduct<br>[0.98]  | Epilepsy<br>[1.71]  | Iron<br>[0.67]       | Vit A<br>[0.97]      | Dermatitis<br>[0.69] | Asthma<br>[0.8]      | Anxiety<br>[0.73]    | Congenital<br>[0.86] |
| Tamaulipas      | Neonatal<br>[1.53] | Headaches<br>[0.97] | Conduct<br>[0.98]  | Epilepsy<br>[1.79]  | Asthma<br>[0.89]     | Anxiety<br>[0.7]     | Vit A<br>[1.02]      | Diarrhea<br>[1.16]   | Dermatitis<br>[0.56] | Back Pain<br>[0.67]  |
| Tlaxcala        | Neonatal<br>[1.48] | Headaches<br>[1.0]  | Conduct<br>[0.99]  | Epilepsy<br>[1.77]  | Asthma<br>[0.93]     | Dermatitis<br>[0.7]  | Anxiety<br>[0.74]    | Congenital<br>[0.84] | Back Pain<br>[0.7]   | Depression<br>[0.7]  |
| Veracruz        | Neonatal<br>[1.48] | Headaches<br>[1.01] | Conduct<br>[1.0]   | Epilepsy<br>[1.73]  | Asthma<br>[0.86]     | Dermatitis<br>[0.71] | Anxiety<br>[0.75]    | Vit A<br>[0.7]       | Congenital<br>[0.81] | Back Pain<br>[0.71]  |

Values shown in brackets represent the ratio of observed YLDs to predicted YLDs on the basis of Socio-Demographic Index (SDI), rounded to two (2) digits. Color ranges (shown below) were calculated to place a roughly equal number of cells into each bin.

| Color Key:             |                     | [0.0-0.78]          | (0.78-0.88]          | (0.88-0.94]          | (0.94-1.0]         | (1.0-1.06]           | (1.06-1.18]          | (1.18-1.38]          | (1.38-1.66]          | 1.66+                  |
|------------------------|---------------------|---------------------|----------------------|----------------------|--------------------|----------------------|----------------------|----------------------|----------------------|------------------------|
|                        | 1                   | 2                   | 3                    | 4                    | 5                  | 6                    | 7                    | 8                    | 9                    | 10                     |
| Yucatan                | Neonatal<br>[1.28]  | Headaches<br>[0.99] | Conduct<br>[0.99]    | Epilepsy<br>[1.8]    | Asthma<br>[0.83]   | Dermatitis<br>[0.65] | Anxiety<br>[0.72]    | Depression<br>[0.82] | Congenital<br>[0.81] | Vit A<br>[0.74]        |
| Zacatecas              | Neonatal<br>[0.97]  | Headaches<br>[0.97] | Conduct<br>[0.97]    | Epilepsy<br>[1.78]   | Asthma<br>[0.94]   | Dermatitis<br>[0.7]  | Anxiety<br>[0.72]    | Vit A<br>[0.74]      | Back Pain<br>[0.69]  | Congenital<br>[0.73]   |
| Nicaragua              | Neonatal<br>[1.43]  | Headaches<br>[1.08] | Diarrhea<br>[1.7]    | Dermatitis<br>[1.06] | Conduct<br>[0.95]  | Asthma<br>[0.98]     | Back Pain<br>[0.98]  | Iron<br>[0.38]       | Epilepsy<br>[1.24]   | Depression<br>[0.9]    |
| Panama                 | Neonatal<br>[1.27]  | Headaches<br>[0.98] | Dermatitis<br>[1.16] | Diarrhea<br>[2.57]   | Asthma<br>[1.29]   | Iron<br>[1.18]       | Conduct<br>[0.92]    | Back Pain<br>[0.81]  | Anxiety<br>[0.63]    | Epilepsy<br>[1.35]     |
| Venezuela              | Neonatal<br>[1.39]  | Diarrhea<br>[3.03]  | Headaches<br>[0.97]  | Dermatitis<br>[0.99] | Conduct<br>[0.91]  | Asthma<br>[1.03]     | Epilepsy<br>[1.58]   | Back Pain<br>[0.74]  | Anxiety<br>[0.64]    | Depression<br>[0.77]   |
| Tropical Latin America | Headaches<br>[1.49] | Back Pain<br>[2.15] | Neonatal<br>[0.91]   | Asthma<br>[1.49]     | Anxiety<br>[1.22]  | Iron<br>[1.21]       | Depression<br>[1.32] | Conduct<br>[0.93]    | Vit A<br>[1.37]      | Dermatitis<br>[0.74]   |
|                        | Headaches<br>[1.49] | Back Pain<br>[2.17] | Neonatal<br>[0.92]   | Asthma<br>[1.48]     | Iron<br>[1.21]     | Depression<br>[1.25] | Conduct<br>[1.33]    | Vit A<br>[0.93]      | Anxiety<br>[1.41]    | Dermatitis<br>[0.73]   |
| Acre                   | Headaches<br>[1.59] | Iron<br>[2.41]      | Back Pain<br>[0.96]  | Neonatal<br>[0.96]   | Anxiety<br>[1.35]  | Asthma<br>[1.31]     | Depression<br>[1.39] | Conduct<br>[0.98]    | Vit A<br>[1.08]      | Dermatitis<br>[0.77]   |
| Alagoas                | Headaches<br>[1.56] | Back Pain<br>[2.33] | Iron<br>[0.82]       | Neonatal<br>[0.82]   | Anxiety<br>[1.35]  | Vit A<br>[1.07]      | Asthma<br>[1.24]     | Depression<br>[1.54] | Conduct<br>[0.95]    | Dermatitis<br>[0.66]   |
| Amapa                  | Headaches<br>[1.56] | Back Pain<br>[2.19] | Neonatal<br>[0.95]   | Iron<br>[1.58]       | Asthma<br>[1.42]   | Anxiety<br>[1.27]    | Depression<br>[1.39] | Conduct<br>[0.98]    | Dermatitis<br>[0.73] | Vit A<br>[1.13]        |
| Amazonas               | Headaches<br>[1.51] | Back Pain<br>[2.22] | Iron<br>[1.37]       | Neonatal<br>[0.81]   | Asthma<br>[1.42]   | Anxiety<br>[1.27]    | Conduct<br>[0.95]    | Depression<br>[1.22] | Vit A<br>[1.17]      | Dermatitis<br>[0.76]   |
| Bahia                  | Headaches<br>[1.49] | Back Pain<br>[2.23] | Iron<br>[1.09]       | Neonatal<br>[0.9]    | Vit A<br>[1.39]    | Asthma<br>[1.29]     | Anxiety<br>[1.29]    | Dermatitis<br>[1.05] | Depression<br>[1.17] | Conduct<br>[0.84]      |
| Ceara                  | Headaches<br>[1.47] | Back Pain<br>[2.18] | Neonatal<br>[0.86]   | Iron<br>[1.01]       | Asthma<br>[1.36]   | Vit A<br>[1.45]      | Anxiety<br>[1.26]    | Depression<br>[1.36] | Conduct<br>[0.91]    | Dermatitis<br>[0.79]   |
| Distrito Federal       | Headaches<br>[1.46] | Back Pain<br>[1.96] | Neonatal<br>[1.03]   | Asthma<br>[1.64]     | Anxiety<br>[1.06]  | Depression<br>[1.24] | Conduct<br>[0.96]    | Dermatitis<br>[0.68] | Congenital<br>[0.96] | Iron<br>[1.8]          |
| Espirito Santo         | Headaches<br>[1.49] | Back Pain<br>[2.1]  | Iron<br>[1.85]       | Asthma<br>[1.73]     | Neonatal<br>[0.89] | Anxiety<br>[1.21]    | Depression<br>[1.37] | Conduct<br>[0.94]    | Vit A<br>[1.75]      | Dermatitis<br>[0.73]   |
| Goias                  | Headaches<br>[1.56] | Back Pain<br>[2.3]  | Neonatal<br>[0.82]   | Asthma<br>[1.51]     | Anxiety<br>[1.28]  | Depression<br>[1.44] | Iron<br>[1.04]       | Conduct<br>[0.97]    | Dermatitis<br>[0.73] | Vit A<br>[1.13]        |
| Maranhao               | Headaches<br>[1.54] | Iron<br>[0.91]      | Back Pain<br>[2.31]  | Vit A<br>[1.13]      | Neonatal<br>[0.91] | Asthma<br>[1.26]     | Anxiety<br>[1.32]    | Conduct<br>[0.92]    | Depression<br>[1.28] | Dermatitis<br>[0.8]    |
| Mato Grosso            | Headaches<br>[1.5]  | Back Pain<br>[2.19] | Neonatal<br>[0.86]   | Asthma<br>[1.6]      | Anxiety<br>[1.23]  | Depression<br>[1.28] | Conduct<br>[1.0]     | Vit A<br>[0.95]      | Dermatitis<br>[1.5]  | Dermatitis<br>[0.74]   |
| Mato Grosso do Sul     | Headaches<br>[1.52] | Back Pain<br>[2.24] | Neonatal<br>[0.99]   | Asthma<br>[1.46]     | Anxiety<br>[1.25]  | Depression<br>[1.43] | Conduct<br>[0.95]    | Iron<br>[0.84]       | Dermatitis<br>[0.74] | Vit A<br>[1.18]        |
| Minas Gerais           | Headaches<br>[1.53] | Back Pain<br>[2.27] | Neonatal<br>[0.96]   | Asthma<br>[1.54]     | Anxiety<br>[1.26]  | Depression<br>[1.35] | Iron<br>[1.05]       | Conduct<br>[0.97]    | Vit A<br>[1.21]      | Dermatitis<br>[0.63]   |
| Para                   | Headaches<br>[1.55] | Back Pain<br>[2.3]  | Neonatal<br>[0.86]   | Iron<br>[0.94]       | Asthma<br>[1.4]    | Anxiety<br>[1.34]    | Vit A<br>[1.12]      | Conduct<br>[0.96]    | Diarrhea<br>[1.42]   | Dermatitis<br>[0.8]    |
| Paraiba                | Headaches<br>[1.47] | Back Pain<br>[2.21] | Neonatal<br>[0.81]   | Iron<br>[0.84]       | Vit A<br>[1.31]    | Asthma<br>[1.32]     | Anxiety<br>[1.28]    | Depression<br>[1.3]  | Conduct<br>[0.91]    | Dermatitis<br>[0.81]   |
| Parana                 | Headaches<br>[1.54] | Back Pain<br>[2.24] | Neonatal<br>[0.93]   | Asthma<br>[1.63]     | Anxiety<br>[1.23]  | Depression<br>[1.38] | Conduct<br>[0.97]    | Iron<br>[1.07]       | Dermatitis<br>[0.64] | Congenital<br>[0.95]   |
| Pernambuco             | Headaches<br>[1.49] | Back Pain<br>[2.21] | Iron<br>[1.16]       | Neonatal<br>[0.85]   | Asthma<br>[1.42]   | Anxiety<br>[1.28]    | Depression<br>[1.49] | Vit A<br>[1.19]      | Conduct<br>[0.92]    | Dermatitis<br>[0.77]   |
| Piaui                  | Headaches<br>[1.52] | Back Pain<br>[2.32] | Neonatal<br>[0.95]   | Asthma<br>[1.36]     | Anxiety<br>[1.32]  | Conduct<br>[0.93]    | Depression<br>[1.23] | Dermatitis<br>[0.81] | Vit A<br>[0.7]       | Congenital<br>[0.94]   |
| Rio de Janeiro         | Headaches<br>[1.51] | Neonatal<br>[1.14]  | Back Pain<br>[1.89]  | Asthma<br>[1.48]     | Anxiety<br>[1.18]  | Depression<br>[1.25] | Conduct<br>[0.96]    | Dermatitis<br>[0.7]  | Iron<br>[1.0]        | Congenital<br>[0.88]</ |

**eFigure 9a. Leading ten causes of YLDs with the ratio of observed YLDs to YLDs expected on the basis of Socio-Demographic Index alone in 2017, <20 years, both sexes combined.** The top ten causes contributing to YLDs are listed globally, by socio-demographic quintile, and then by GBD superregion, region, country, and subnationally where modeled. For each cell, the ratio of observed YLDs to YLDs expected on the basis of socio-demographic index (SDI) alone are listed. Abbreviations: YLD=year of life lived with disability, GBD=Global Burden of Disease.

Values shown in brackets represent the ratio of observed YLDs to predicted YLDs on the basis of Socio-Demographic Index (SDI), rounded to two (2) digits. Color ranges (shown below) were calculated to place a roughly equal number of cells into each bin.

| COLOR KEY:                   |                                | [0.0-0.78]          | [0.78-0.88]          | [0.88-0.94]          | [0.94-1.0]           | [1.0-1.06]           | [1.06-1.18]          | [1.18-1.38]          | [1.38-1.66]                    | 1.66+                |
|------------------------------|--------------------------------|---------------------|----------------------|----------------------|----------------------|----------------------|----------------------|----------------------|--------------------------------|----------------------|
|                              | 1                              | 2                   | 3                    | 4                    | 5                    | 6                    | 7                    | 8                    | 9                              | 10                   |
| Sao Paulo                    | Headaches<br>[1.44]            | Back Pain<br>[2.12] | Neonatal<br>[0.97]   | Asthma<br>[1.6]      | Anxiety<br>[1.15]    | Depression<br>[1.43] | Conduct<br>[0.97]    | Iron<br>[1.32]       | Dermatitis<br>[0.61]           | Bipolar<br>[1.8]     |
| Sergipe                      | Headaches<br>[1.51]            | Back Pain<br>[2.21] | Neonatal<br>[0.99]   | Iron<br>[1.24]       | Asthma<br>[1.46]     | Anxiety<br>[1.28]    | Vit A<br>[1.46]      | Depression<br>[1.33] | Conduct<br>[0.94]              | Dermatitis<br>[0.65] |
| Tocantins                    | Headaches<br>[1.51]            | Back Pain<br>[2.27] | Neonatal<br>[0.97]   | Iron<br>[1.12]       | Asthma<br>[1.39]     | Anxiety<br>[1.29]    | Depression<br>[1.4]  | Conduct<br>[0.94]    | Vit A<br>[1.2]                 | Dermatitis<br>[0.78] |
| Paraguay                     | Headaches<br>[1.43]            | Asthma<br>[1.74]    | Neonatal<br>[0.79]   | Back Pain<br>[1.41]  | Anxiety<br>[1.24]    | Iron<br>[0.92]       | Diarrhea<br>[1.98]   | Dermatitis<br>[1.04] | Conduct<br>[0.85]              | Depression<br>[1.04] |
| North Africa and Middle East | Iron<br>[1.71]                 | Neonatal<br>[1.0]   | Headaches<br>[0.96]  | Anxiety<br>[1.07]    | Back Pain<br>[1.15]  | Diarrhea<br>[1.83]   | Conduct<br>[0.93]    | Asthma<br>[0.96]     | Depression<br>[1.11]           | Dermatitis<br>[0.74] |
| Afghanistan                  | Diarrhea<br>[1.38]             | Vit A<br>[0.45]     | Neonatal<br>[1.13]   | Iron<br>[0.34]       | Headaches<br>[1.25]  | Dermatitis<br>[1.0]  | Anxiety<br>[1.34]    | Back Pain<br>[1.61]  | Conduct<br>[1.03]              | Asthma<br>[1.14]     |
| Algeria                      | Neonatal<br>[1.13]             | Headaches<br>[0.84] | Anxiety<br>[0.95]    | Asthma<br>[1.09]     | Conduct<br>[0.86]    | Back Pain<br>[0.96]  | Dermatitis<br>[0.75] | Depression<br>[0.97] | Diarrhea<br>[1.59]             | Iron<br>[0.89]       |
| Bahrain                      | Neonatal<br>[1.06]             | Headaches<br>[0.89] | Anxiety<br>[0.98]    | Dermatitis<br>[0.89] | Conduct<br>[0.91]    | Back Pain<br>[1.01]  | Depression<br>[1.09] | Asthma<br>[0.99]     | Diarrhea<br>[1.79]             | Congenital<br>[0.8]  |
| Egypt                        | Neonatal<br>[1.06]             | Iron<br>[1.33]      | Headaches<br>[0.99]  | Asthma<br>[1.18]     | Back Pain<br>[1.27]  | Conduct<br>[0.91]    | Diarrhea<br>[1.56]   | Anxiety<br>[0.99]    | Depression<br>[0.94]           | Dermatitis<br>[0.63] |
| Iran                         | Neonatal<br>[1.28]             | Headaches<br>[1.25] | Anxiety<br>[1.33]    | Depression<br>[1.28] | Conduct<br>[0.98]    | Back Pain<br>[0.98]  | Diarrhea<br>[1.78]   | Asthma<br>[0.82]     | Congenital<br>[0.99]           | Dermatitis<br>[0.59] |
| Iraq                         | Neonatal<br>[1.13]             | Iron<br>[1.18]      | Headaches<br>[0.94]  | Anxiety<br>[1.08]    | Conduct<br>[0.91]    | Asthma<br>[1.02]     | Back Pain<br>[1.14]  | Vit A<br>[0.96]      | Conflict<br>Terror<br>[672.19] | Dermatitis<br>[0.71] |
| Jordan                       | Neonatal<br>[1.4]              | Headaches<br>[0.94] | Iron<br>[1.48]       | Asthma<br>[1.24]     | Anxiety<br>[1.05]    | Conduct<br>[0.95]    | Back Pain<br>[1.08]  | Depression<br>[1.07] | Dermatitis<br>[0.75]           | Diarrhea<br>[1.46]   |
| Kuwait                       | Neonatal<br>[1.2]              | Headaches<br>[0.72] | Asthma<br>[1.21]     | Anxiety<br>[0.88]    | Conduct<br>[0.92]    | Back Pain<br>[0.92]  | Dermatitis<br>[0.74] | Diarrhea<br>[2.3]    | Depression<br>[0.94]           | Iron<br>[1.75]       |
| Lebanon                      | Neonatal<br>[1.06]             | Headaches<br>[0.91] | Anxiety<br>[1.18]    | Asthma<br>[1.35]     | Dermatitis<br>[0.88] | Conduct<br>[0.89]    | Diarrhea<br>[2.01]   | Depression<br>[0.99] | Back Pain<br>[0.78]            | Congenital<br>[0.91] |
| Libya                        | Neonatal<br>[1.05]             | Headaches<br>[0.91] | Diarrhea<br>[2.94]   | Anxiety<br>[0.95]    | Dermatitis<br>[0.87] | Back Pain<br>[1.02]  | Conduct<br>[0.94]    | Iron<br>[1.83]       | Depression<br>[1.05]           | Asthma<br>[1.0]      |
| Morocco                      | Neonatal<br>[1.05]             | Headaches<br>[1.04] | Iron<br>[0.91]       | Depression<br>[1.79] | Back Pain<br>[1.47]  | Anxiety<br>[1.25]    | Conduct<br>[0.99]    | Dermatitis<br>[0.89] | Vit A<br>[0.98]                | Diarrhea<br>[1.3]    |
| Palestine                    | Neonatal<br>[1.11]             | Headaches<br>[0.99] | Depression<br>[1.63] | Anxiety<br>[1.2]     | Iron<br>[0.54]       | Asthma<br>[1.07]     | Conduct<br>[0.95]    | Back Pain<br>[1.21]  | Dermatitis<br>[0.86]           | Diarrhea<br>[1.11]   |
| Oman                         | Neonatal<br>[1.13]             | Headaches<br>[0.78] | Iron<br>[2.12]       | Diarrhea<br>[2.43]   | Anxiety<br>[0.85]    | Conduct<br>[0.83]    | Back Pain<br>[0.85]  | Asthma<br>[0.92]     | Dermatitis<br>[0.67]           | Depression<br>[0.88] |
| Qatar                        | Neonatal<br>[1.02]             | Headaches<br>[0.77] | Dermatitis<br>[0.88] | Anxiety<br>[0.83]    | Conduct<br>[0.86]    | Back Pain<br>[0.89]  | Asthma<br>[0.91]     | Depression<br>[0.87] | Congenital<br>[0.89]           | Iron<br>[1.28]       |
| Saudi Arabia                 | Headaches<br>[1.01]            | Neonatal<br>[0.75]  | Anxiety<br>[0.98]    | Back Pain<br>[1.09]  | Conduct<br>[0.99]    | Dermatitis<br>[0.85] | Depression<br>[1.1]  | Diarrhea<br>[2.23]   | Congenital<br>[0.95]           | Asthma<br>[0.73]     |
| Sudan                        | Iron<br>[1.22]                 | Diarrhea<br>[2.02]  | Neonatal<br>[0.87]   | Headaches<br>[1.01]  | Vit A<br>[0.74]      | Anxiety<br>[1.21]    | Back Pain<br>[1.33]  | Conduct<br>[0.95]    | Asthma<br>[1.01]               | Dermatitis<br>[0.78] |
| Syria                        | Conflict<br>Terror<br>[2962.5] | Iron<br>[1.25]      | Headaches<br>[1.11]  | Neonatal<br>[0.89]   | Anxiety<br>[1.31]    | Back Pain<br>[1.36]  | Conduct<br>[1.09]    | Depression<br>[1.28] | Asthma<br>[0.88]               | Dermatitis<br>[0.58] |
| Tunisia                      | Neonatal<br>[1.05]             | Headaches<br>[0.93] | Anxiety<br>[1.06]    | Conduct<br>[0.94]    | Dermatitis<br>[0.87] | Back Pain<br>[0.98]  | Depression<br>[1.1]  | Asthma<br>[0.84]     | Diarrhea<br>[1.44]             | Congenital<br>[0.8]  |
| Turkey                       | Neonatal<br>[0.77]             | Headaches<br>[0.8]  | Back Pain<br>[1.24]  | Conduct<br>[0.96]    | Depression<br>[1.12] | Anxiety<br>[0.82]    | Dermatitis<br>[0.67] | Asthma<br>[0.88]     | Iron<br>[1.07]                 | Diarrhea<br>[1.46]   |
| UAE                          | Neonatal<br>[1.07]             | Headaches<br>[0.81] | Asthma<br>[1.38]     | Dermatitis<br>[0.87] | Anxiety<br>[0.82]    | Conduct<br>[0.86]    | Diarrhea<br>[2.51]   | Back Pain<br>[0.84]  | Iron<br>[2.03]                 | Congenital<br>[0.92] |
| Yemen                        | Iron<br>[3.34]                 | Vit A<br>[1.51]     | Diarrhea<br>[2.1]    | Neonatal<br>[1.19]   | Headaches<br>[1.02]  | Dermatitis<br>[0.97] | Anxiety<br>[1.2]     | Hemog<br>[2.7]       | Conduct<br>[0.94]              | Back Pain<br>[1.25]  |
| South Asia                   | Iron<br>[1.92]                 | Neonatal<br>[1.46]  | Vit A<br>[1.53]      | Headaches<br>[1.03]  | Conduct<br>[0.89]    | Anxiety<br>[0.88]    | Congenital<br>[1.01] | ID<br>[5.06]         | Dermatitis<br>[0.64]           | Diarrhea<br>[0.91]   |
| Bangladesh                   | Iron<br>[0.94]                 | Neonatal<br>[1.43]  | Headaches<br>[1.2]   | Anxiety<br>[1.15]    | Dermatitis<br>[0.89] | Conduct<br>[0.88]    | Depression<br>[1.11] | Vit A<br>[0.43]      | Back Pain<br>[1.04]            | Congenital<br>[0.96] |
| Bhutan                       | Iron<br>[3.03]                 | Neonatal<br>[1.33]  | Headaches<br>[1.02]  | Vit A<br>[1.35]      | Dermatitis<br>[0.9]  | Diarrhea<br>[1.31]   | Conduct<br>[0.82]    | Anxiety<br>[0.92]    | Back Pain<br>[0.83]            | Congenital<br>[0.82] |
| India                        | Iron<br>[2.16]                 | Neonatal<br>[1.48]  | Vit A<br>[1.88]      | Headaches<br>[1.02]  | Conduct<br>[0.91]    | ID<br>[6.52]         | Congenital<br>[1.08] | Anxiety<br>[0.84]    | Diarrhea<br>[0.88]             | PEM<br>[18.45]       |

**eFigure 9a. Leading ten causes of YLDs with the ratio of observed YLDs to YLDs expected on the basis of Socio-Demographic Index alone in 2017, <20 years, both sexes combined.** The top ten causes contributing to YLDs are listed globally, by socio-demographic quintile, and then by GBD superregion, region, country, and subnationally where modeled. For each cell, the ratio of observed YLDs to YLDs expected on the basis of socio-demographic index (SDI) alone are listed. Abbreviations: YLD=year of life lived with disability, GBD=Global Burden of Disease.

Values shown in brackets represent the ratio of observed YLDs to predicted YLDs on the basis of Socio-Demographic Index (SDI), rounded to two (2) digits. Color ranges (shown below) were calculated to place a roughly equal number of cells into each bin.

| COLOR KEY:           |                    | [0.0-0.78]          | [0.78-0.88]         | [0.88-0.94]         | [0.94-1.0]        | [1.0-1.06]           | [1.06-1.18]          | [1.18-1.38]          | [1.38-1.66]          | 1.66+                |
|----------------------|--------------------|---------------------|---------------------|---------------------|-------------------|----------------------|----------------------|----------------------|----------------------|----------------------|
|                      | 1                  | 2                   | 3                   | 4                   | 5                 | 6                    | 7                    | 8                    | 9                    | 10                   |
| Andhra Pradesh       | Iron<br>[1.76]     | Neonatal<br>[1.61]  | Vit A<br>[1.55]     | Headaches<br>[1.08] | Conduct<br>[0.93] | Anxiety<br>[0.88]    | Congenital<br>[1.03] | ID<br>[5.47]         | Depression<br>[1.02] | PEM<br>[17.82]       |
| Arunachal Pradesh    | Iron<br>[1.95]     | Neonatal<br>[1.55]  | Vit A<br>[1.62]     | Headaches<br>[1.02] | Conduct<br>[0.9]  | Congenital<br>[1.05] | Anxiety<br>[0.84]    | ID<br>[5.35]         | PEM<br>[23.35]       | Depression<br>[0.91] |
| Assam                | Iron<br>[1.88]     | Neonatal<br>[1.42]  | Vit A<br>[1.48]     | Headaches<br>[1.03] | ID<br>[6.92]      | Conduct<br>[0.89]    | Congenital<br>[1.09] | Anxiety<br>[0.84]    | Dermatitis<br>[0.56] | Depression<br>[0.77] |
| Bihar                | Iron<br>[1.46]     | Vit A<br>[1.28]     | Neonatal<br>[1.6]   | Headaches<br>[1.12] | ID<br>[7.13]      | Conduct<br>[0.96]    | Congenital<br>[1.04] | Anxiety<br>[0.89]    | Diarrhea<br>[0.81]   | Hemog<br>[1.81]      |
| Chhattisgarh         | Iron<br>[1.75]     | Neonatal<br>[1.53]  | Vit A<br>[1.4]      | Headaches<br>[1.03] | Conduct<br>[0.88] | ID<br>[6.0]          | Congenital<br>[1.05] | Anxiety<br>[0.78]    | PEM<br>[12.15]       | Dermatitis<br>[0.56] |
| Delhi                | Iron<br>[7.92]     | Neonatal<br>[1.47]  | Vit A<br>[3.91]     | Headaches<br>[0.93] | Conduct<br>[0.89] | Anxiety<br>[0.69]    | Congenital<br>[0.96] | Diarrhea<br>[1.39]   | Hemog<br>[6.16]      | Blindness<br>[1.67]  |
| Goa                  | Neonatal<br>[1.8]  | Headaches<br>[0.99] | Vit A<br>[3.24]     | Iron<br>[1.96]      | Conduct<br>[0.93] | Anxiety<br>[0.66]    | Congenital<br>[0.99] | Diarrhea<br>[1.48]   | Depression<br>[0.71] | Dermatitis<br>[0.5]  |
| Gujarat              | Iron<br>[3.76]     | Neonatal<br>[1.52]  | Vit A<br>[2.22]     | Headaches<br>[0.98] | Conduct<br>[0.89] | PEM<br>[44.45]       | Congenital<br>[1.05] | Anxiety<br>[0.78]    | ID<br>[5.3]          | Hemog<br>[3.26]      |
| Haryana              | Iron<br>[4.49]     | Neonatal<br>[1.51]  | Vit A<br>[2.56]     | Headaches<br>[0.95] | Conduct<br>[0.88] | Congenital<br>[1.03] | Anxiety<br>[0.79]    | Hemog<br>[3.71]      | Depression<br>[0.84] | Dermatitis<br>[0.55] |
| Himachal Pradesh     | Iron<br>[4.58]     | Neonatal<br>[1.64]  | Vit A<br>[2.54]     | Headaches<br>[0.99] | Conduct<br>[0.9]  | Anxiety<br>[0.79]    | Congenital<br>[1.0]  | ID<br>[5.34]         | Dermatitis<br>[0.53] | Depression<br>[0.74] |
| Jammu & Kashmir      | Iron<br>[1.82]     | Neonatal<br>[1.46]  | Vit A<br>[2.16]     | Headaches<br>[1.05] | Conduct<br>[0.96] | ID<br>[6.46]         | Anxiety<br>[0.86]    | Congenital<br>[1.06] | Diarrhea<br>[0.95]   | Dermatitis<br>[0.56] |
| Jharkhand            | Iron<br>[1.8]      | Neonatal<br>[1.59]  | Vit A<br>[1.5]      | Headaches<br>[1.08] | Conduct<br>[1.02] | ID<br>[6.0]          | PEM<br>[11.98]       | Congenital<br>[1.05] | Anxiety<br>[0.91]    | Diarrhea<br>[0.79]   |
| Karnataka            | Neonatal<br>[1.74] | Iron<br>[1.68]      | Vit A<br>[1.9]      | Headaches<br>[1.0]  | Conduct<br>[0.77] | Anxiety<br>[0.85]    | Congenital<br>[1.02] | PEM<br>[31.28]       | ID<br>[5.52]         | Dermatitis<br>[0.56] |
| Kerala               | Neonatal<br>[2.01] | Headaches<br>[0.97] | Iron<br>[1.36]      | Vit A<br>[2.13]     | Conduct<br>[0.86] | Anxiety<br>[0.83]    | Congenital<br>[1.01] | Dermatitis<br>[0.52] | PEM<br>[121.78]      | Depression<br>[0.72] |
| Madhya Pradesh       | Iron<br>[2.19]     | Vit A<br>[1.62]     | Neonatal<br>[1.44]  | Headaches<br>[1.03] | ID<br>[6.58]      | Conduct<br>[0.89]    | PEM<br>[12.0]        | Congenital<br>[1.05] | Hemog<br>[2.27]      | Anxiety<br>[0.77]    |
| Maharashtra          | Iron<br>[3.09]     | Neonatal<br>[1.61]  | Vit A<br>[2.29]     | Headaches<br>[1.0]  | Conduct<br>[0.95] | PEM<br>[75.94]       | Anxiety<br>[0.8]     | Congenital<br>[1.02] | ID<br>[5.4]          | Depression<br>[0.8]  |
| Manipur              | Neonatal<br>[1.66] | Headaches<br>[1.04] | Vit A<br>[1.39]     | Conduct<br>[0.91]   | ID<br>[7.1]       | Anxiety<br>[0.93]    | Iron<br>[0.55]       | Congenital<br>[1.07] | Depression<br>[0.89] | Diarrhea<br>[0.98]   |
| Meghalaya            | Iron<br>[2.14]     | Neonatal<br>[1.6]   | Vit A<br>[1.79]     | Headaches<br>[1.03] | Conduct<br>[0.92] | ID<br>[6.44]         | Congenital<br>[1.07] | Anxiety<br>[0.85]    | Depression<br>[0.92] | Dermatitis<br>[0.57] |
| Mizoram              | Neonatal<br>[1.64] | Headaches<br>[1.0]  | Vit A<br>[1.64]     | Conduct<br>[0.9]    | Iron<br>[0.69]    | Anxiety<br>[0.81]    | Congenital<br>[1.04] | ID<br>[6.4]          | Diarrhea<br>[1.25]   | Dermatitis<br>[0.55] |
| Nagaland             | Neonatal<br>[1.7]  | Iron<br>[2.53]      | Headaches<br>[1.01] | Vit A<br>[1.98]     | Conduct<br>[0.92] | Anxiety<br>[0.8]     | Congenital<br>[1.02] | ID<br>[5.66]         | Dermatitis<br>[0.53] | Depression<br>[0.76] |
| Odisha               | Neonatal<br>[1.44] | Iron<br>[1.0]       | Vit A<br>[1.59]     | Headaches<br>[1.04] | ID<br>[6.56]      | Conduct<br>[0.9]     | Congenital<br>[1.07] | Anxiety<br>[0.85]    | PEM<br>[16.17]       | Diarrhea<br>[0.97]   |
| Punjab               | Iron<br>[3.65]     | Neonatal<br>[1.54]  | Vit A<br>[2.36]     | Headaches<br>[0.98] | Conduct<br>[0.91] | Congenital<br>[1.03] | Anxiety<br>[0.76]    | ID<br>[5.28]         | Dermatitis<br>[0.52] | Hemog<br>[3.34]      |
| Rajasthan            | Iron<br>[1.61]     | Neonatal<br>[1.41]  | Vit A<br>[1.51]     | Headaches<br>[1.04] | ID<br>[6.2]       | Conduct<br>[0.91]    | Congenital<br>[1.05] | PEM<br>[11.67]       | Anxiety<br>[0.88]    | Diarrhea<br>[0.77]   |
| Sikkim               | Iron<br>[3.05]     | Neonatal<br>[1.65]  | Headaches<br>[1.05] | Vit A<br>[2.11]     | Conduct<br>[0.92] | Anxiety<br>[0.82]    | Congenital<br>[1.0]  | Diarrhea<br>[1.16]   | Depression<br>[0.79] | Dermatitis<br>[0.54] |
| Tamil Nadu           | Iron<br>[2.31]     | Neonatal<br>[1.56]  | Vit A<br>[2.45]     | Headaches<br>[0.99] | Conduct<br>[0.88] | PEM<br>[68.31]       | Anxiety<br>[0.78]    | Depression<br>[0.97] | ID<br>[5.53]         | Congenital<br>[0.85] |
| Telangana            | Iron<br>[2.72]     | Neonatal<br>[1.6]   | Vit A<br>[1.94]     | Headaches<br>[1.05] | Conduct<br>[0.91] | PEM<br>[36.5]        | Anxiety<br>[0.85]    | Congenital<br>[1.04] | Depression<br>[0.98] | ID<br>[5.48]         |
| Tripura              | Iron<br>[1.54]     | Neonatal<br>[1.55]  | Vit A<br>[1.71]     | Headaches<br>[1.07] | Conduct<br>[0.93] | ID<br>[6.45]         | Anxiety<br>[0.87]    | Congenital<br>[1.05] | PEM<br>[17.78]       | Diarrhea<br>[0.87]   |
| Uttar Pradesh        | Iron<br>[1.88]     | Vit A<br>[1.58]     | Neonatal<br>[1.37]  | Headaches<br>[1.08] | ID<br>[6.71]      | Conduct<br>[0.93]    | Congenital<br>[1.14] | Anxiety<br>[0.85]    | Diarrhea<br>[0.82]   | Hemog<br>[2.21]      |
| Uttarakhand          | Iron<br>[3.32]     | Neonatal<br>[1.62]  | Vit A<br>[2.06]     | Headaches<br>[1.04] | Conduct<br>[0.93] | Anxiety<br>[0.84]    | Congenital<br>[1.03] | Diarrhea<br>[1.08]   | ID<br>[5.14]         | Dermatitis<br>[0.55] |
| W Bengal             | Iron<br>[1.42]     | Neonatal<br>[1.43]  | Vit A<br>[1.69]     | Headaches<br>[1.09] | ID<br>[6.93]      | Conduct<br>[0.93]    | Anxiety<br>[0.9]     | Congenital<br>[1.05] | Dermatitis<br>[0.56] | Depression<br>[0.77] |
| UTs other than Delhi | Iron<br>[3.92]     | Neonatal<br>[1.74]  | Vit A<br>[2.75]     | Headaches<br>[1.01] | Conduct<br>[0.92] | Anxiety<br>[0.78]    | Congenital<br>[1.0]  | Depression<br>[0.83] | Dermatitis<br>[0.52] | Back Pain<br>[0.58]  |

**eFigure 9a. Leading ten causes of YLDs with the ratio of observed YLDs to YLDs expected on the basis of Socio-Demographic Index alone in 2017, <20 years, both sexes combined.** The top ten causes contributing to YLDs are listed globally, by socio-demographic quintile, and then by GBD superregion, region, country, and subnationally where modeled. For each cell, the ratio of observed YLDs to YLDs expected on the basis of socio-demographic index (SDI) alone are listed. Abbreviations: YLD=year of life lived with disability, GBD=Global Burden of Disease.

Values shown in brackets represent the ratio of observed YLDs to predicted YLDs on the basis of Socio-Demographic Index (SDI), rounded to two (2) digits. Color ranges (shown below) were calculated to place a roughly equal number of cells into each bin.

| COLOR KEY:                             |                     | [0.0-0.78]          | [0.78-0.88]          | [0.88-0.94]          | [0.94-1.0]           | [1.0-1.06]           | [1.06-1.18]          | [1.18-1.38]          | [1.38-1.66]          | 1.66+                |
|----------------------------------------|---------------------|---------------------|----------------------|----------------------|----------------------|----------------------|----------------------|----------------------|----------------------|----------------------|
|                                        | 1                   | 2                   | 3                    | 4                    | 5                    | 6                    | 7                    | 8                    | 9                    | 10                   |
| Nepal                                  | Neonatal<br>[1.68]  | Iron<br>[0.7]       | Headaches<br>[1.54]  | Vit A<br>[0.48]      | Dermatitis<br>[0.88] | Anxiety<br>[1.06]    | Back Pain<br>[1.26]  | Conduct<br>[0.9]     | Epilepsy<br>[1.05]   | Depression<br>[0.93] |
| Pakistan                               | Iron<br>[1.49]      | Neonatal<br>[1.39]  | Headaches<br>[0.93]  | Vit A<br>[0.76]      | Dermatitis<br>[0.93] | Diarrhea<br>[1.2]    | Conduct<br>[0.84]    | Anxiety<br>[0.96]    | Epilepsy<br>[1.0]    | Depression<br>[0.77] |
| Southeast Asia, East Asia, and Oceania | Neonatal<br>[1.09]  | Headaches<br>[0.6]  | Conduct<br>[0.79]    | Asthma<br>[0.83]     | Anxiety<br>[0.71]    | Dermatitis<br>[0.63] | Congenital<br>[0.88] | Back Pain<br>[0.67]  | Depression<br>[0.64] | Skin Viral<br>[1.11] |
| East Asia                              | Neonatal<br>[1.37]  | Anxiety<br>[0.71]   | Conduct<br>[0.7]     | Headaches<br>[0.44]  | Asthma<br>[0.67]     | Dermatitis<br>[0.5]  | Back Pain<br>[0.62]  | Skin Viral<br>[1.18] | Congenital<br>[0.72] | Depression<br>[0.58] |
| China                                  | Neonatal<br>[1.39]  | Anxiety<br>[0.71]   | Conduct<br>[0.7]     | Headaches<br>[0.43]  | Asthma<br>[0.66]     | Dermatitis<br>[0.5]  | Back Pain<br>[0.61]  | Skin Viral<br>[1.19] | Congenital<br>[0.72] | Depression<br>[0.58] |
| N Korea                                | Neonatal<br>[0.67]  | Iron<br>[0.55]      | Diarrhea<br>[1.49]   | Anxiety<br>[1.49]    | Headaches<br>[1.09]  | Back Pain<br>[0.83]  | Conduct<br>[0.83]    | Asthma<br>[0.71]     | Dermatitis<br>[0.61] | Vit A<br>[0.53]      |
| Taiwan                                 | Headaches<br>[0.72] | Asthma<br>[1.32]    | Back Pain<br>[0.88]  | Anxiety<br>[0.73]    | Neonatal<br>[0.58]   | Conduct<br>[0.87]    | Dermatitis<br>[0.57] | Diarrhea<br>[2.31]   | Congenital<br>[0.84] | Skin Viral<br>[1.05] |
| Oceania                                | Iron<br>[1.19]      | Asthma<br>[1.86]    | Neonatal<br>[0.76]   | Diarrhea<br>[1.4]    | Dermatitis<br>[0.98] | Headaches<br>[0.71]  | Vit A<br>[0.53]      | Conduct<br>[0.84]    | Anxiety<br>[0.88]    | Congenital<br>[0.92] |
| Am Samoa                               | Asthma<br>[2.0]     | Iron<br>[1.69]      | Neonatal<br>[0.7]    | Diarrhea<br>[2.51]   | Headaches<br>[0.7]   | Dermatitis<br>[0.85] | Conduct<br>[0.89]    | Anxiety<br>[0.79]    | Vit A<br>[1.65]      | Back Pain<br>[0.77]  |
| Micronesia                             | Iron<br>[1.29]      | Asthma<br>[1.72]    | Vit A<br>[1.47]      | Neonatal<br>[0.69]   | Diarrhea<br>[1.7]    | Headaches<br>[0.74]  | Dermatitis<br>[0.96] | Conduct<br>[0.9]     | Anxiety<br>[0.93]    | Back Pain<br>[0.86]  |
| Fiji                                   | Iron<br>[1.75]      | Asthma<br>[1.73]    | Neonatal<br>[0.67]   | Diarrhea<br>[2.08]   | Dermatitis<br>[0.94] | Headaches<br>[0.64]  | Conduct<br>[0.82]    | Vit A<br>[1.13]      | Anxiety<br>[0.79]    | Depression<br>[0.79] |
| Guam                                   | Diarrhea<br>[5.92]  | Asthma<br>[1.98]    | Neonatal<br>[0.77]   | Dermatitis<br>[0.84] | Headaches<br>[0.62]  | Iron<br>[2.71]       | Conduct<br>[0.83]    | Anxiety<br>[0.66]    | Depression<br>[0.88] | Back Pain<br>[0.62]  |
| Kiribati                               | Iron<br>[0.91]      | Vit A<br>[0.83]     | Asthma<br>[1.86]     | Diarrhea<br>[1.33]   | Neonatal<br>[0.76]   | Dermatitis<br>[0.99] | Headaches<br>[0.74]  | Conduct<br>[0.84]    | Anxiety<br>[0.9]     | Congenital<br>[0.91] |
| Marshall                               | Iron<br>[1.04]      | Vit A<br>[1.4]      | Asthma<br>[1.64]     | Neonatal<br>[0.71]   | Diarrhea<br>[1.56]   | Dermatitis<br>[0.99] | Headaches<br>[0.7]   | Conduct<br>[0.86]    | Anxiety<br>[0.9]     | Congenital<br>[0.91] |
| N Mariana                              | Asthma<br>[1.89]    | Neonatal<br>[0.84]  | Headaches<br>[0.82]  | Diarrhea<br>[3.24]   | Conduct<br>[0.96]    | Anxiety<br>[0.83]    | Dermatitis<br>[0.77] | Iron<br>[1.78]       | Depression<br>[1.01] | Back Pain<br>[0.85]  |
| PNG                                    | Iron<br>[1.06]      | Asthma<br>[1.93]    | Neonatal<br>[0.81]   | Diarrhea<br>[1.26]   | Dermatitis<br>[0.98] | Headaches<br>[0.75]  | Conduct<br>[0.85]    | Vit A<br>[0.38]      | Anxiety<br>[0.9]     | Congenital<br>[0.91] |
| Samoa                                  | Iron<br>[1.22]      | Asthma<br>[1.71]    | Vit A<br>[1.28]      | Neonatal<br>[0.73]   | Diarrhea<br>[1.92]   | Dermatitis<br>[0.99] | Headaches<br>[0.66]  | Conduct<br>[0.82]    | Anxiety<br>[0.84]    | Congenital<br>[0.89] |
| Solomon                                | Iron<br>[1.23]      | Vit A<br>[0.8]      | Asthma<br>[1.76]     | Neonatal<br>[0.84]   | Diarrhea<br>[1.27]   | Dermatitis<br>[0.98] | Headaches<br>[0.74]  | Conduct<br>[0.86]    | Anxiety<br>[0.9]     | Congenital<br>[0.9]  |
| Tonga                                  | Asthma<br>[2.26]    | Neonatal<br>[0.69]  | Diarrhea<br>[2.01]   | Dermatitis<br>[0.94] | Headaches<br>[0.68]  | Conduct<br>[0.86]    | Iron<br>[0.69]       | Anxiety<br>[0.85]    | Vit A<br>[1.1]       | Back Pain<br>[0.8]   |
| Vanuatu                                | Iron<br>[1.14]      | Asthma<br>[1.95]    | Vit A<br>[1.0]       | Neonatal<br>[0.78]   | Dermatitis<br>[0.99] | Diarrhea<br>[1.24]   | Headaches<br>[0.69]  | Conduct<br>[0.84]    | Anxiety<br>[0.88]    | Congenital<br>[0.89] |
| Southeast Asia                         | Neonatal<br>[0.72]  | Headaches<br>[0.84] | Conduct<br>[0.93]    | Asthma<br>[1.03]     | Dermatitis<br>[0.8]  | Congenital<br>[1.11] | Iron<br>[0.67]       | Anxiety<br>[0.72]    | Back Pain<br>[0.75]  | Vit A<br>[0.94]      |
| Cambodia                               | Iron<br>[1.31]      | Neonatal<br>[0.77]  | Headaches<br>[0.9]   | Dermatitis<br>[0.98] | Vit A<br>[0.62]      | Conduct<br>[0.91]    | Congenital<br>[1.14] | Asthma<br>[0.93]     | Back Pain<br>[1.08]  | Diarrhea<br>[0.87]   |
| Indonesia                              | Neonatal<br>[0.74]  | Headaches<br>[0.85] | Conduct<br>[1.0]     | Asthma<br>[1.04]     | Anxiety<br>[0.74]    | Congenital<br>[1.0]  | Vit A<br>[1.08]      | Back Pain<br>[0.76]  | Dermatitis<br>[0.6]  | Diarrhea<br>[1.22]   |
| Laos                                   | Iron<br>[0.65]      | Headaches<br>[0.88] | Vit A<br>[0.89]      | Dermatitis<br>[0.98] | Neonatal<br>[0.59]   | Conduct<br>[0.9]     | Anxiety<br>[1.03]    | Asthma<br>[0.97]     | Congenital<br>[1.17] | Back Pain<br>[0.92]  |
| Malaysia                               | Neonatal<br>[0.82]  | Headaches<br>[0.75] | Depression<br>[1.34] | Dermatitis<br>[0.93] | Conduct<br>[0.9]     | Anxiety<br>[0.81]    | Diarrhea<br>[2.24]   | Congenital<br>[1.09] | Asthma<br>[0.9]      | Back Pain<br>[0.64]  |
| Maldives                               | Neonatal<br>[0.67]  | Headaches<br>[0.77] | Iron<br>[1.03]       | Dermatitis<br>[0.94] | Conduct<br>[0.86]    | Asthma<br>[0.97]     | Congenital<br>[1.09] | Anxiety<br>[0.69]    | Depression<br>[0.79] | Scabies<br>[3.28]    |
| Mauritius                              | Iron<br>[3.11]      | Neonatal<br>[0.82]  | Headaches<br>[0.89]  | Depression<br>[1.27] | Conduct<br>[0.96]    | Asthma<br>[1.12]     | Dermatitis<br>[0.84] | Anxiety<br>[0.74]    | Congenital<br>[1.05] | Diarrhea<br>[1.77]   |
| Myanmar                                | Iron<br>[0.77]      | Headaches<br>[0.92] | Neonatal<br>[0.73]   | Congenital<br>[1.63] | Dermatitis<br>[0.98] | Conduct<br>[0.95]    | Vit A<br>[0.76]      | Asthma<br>[0.86]     | Anxiety<br>[0.86]    | Scabies<br>[2.14]    |
| Philippines                            | Neonatal<br>[0.79]  | Asthma<br>[1.36]    | Headaches<br>[0.79]  | Dermatitis<br>[1.04] | Conduct<br>[0.86]    | Congenital<br>[1.18] | Vit A<br>[0.95]      | Back Pain<br>[0.85]  | Iron<br>[0.54]       | Anxiety<br>[0.74]    |
| Sri Lanka                              | Neonatal<br>[0.74]  | Headaches<br>[0.81] | Dermatitis<br>[0.89] | Conduct<br>[0.9]     | Congenital<br>[1.26] | Asthma<br>[0.96]     | Iron<br>[0.86]       | Anxiety<br>[0.72]    | Depression<br>[0.89] | Epilepsy<br>[1.32]   |
| Seychelles                             | Neonatal<br>[0.82]  | Headaches<br>[0.78] | Dermatitis<br>[0.91] | Conduct<br>[0.86]    | Asthma<br>[0.98]     | Congenital<br>[1.07] | Anxiety<br>[0.68]    | Back Pain<br>[0.67]  | Depression<br>[0.73] | Diarrhea<br>[1.21]   |

**eFigure 9a. Leading ten causes of YLDs with the ratio of observed YLDs to YLDs expected on the basis of Socio-Demographic Index alone in 2017, <20 years, both sexes combined.** The top ten causes contributing to YLDs are listed globally, by socio-demographic quintile, and then by GBD superregion, region, country, and subnationally where modeled. For each cell, the ratio of observed YLDs to YLDs expected on the basis of socio-demographic index (SDI) alone are listed. Abbreviations: YLD=year of life lived with disability, GBD=Global Burden of Disease.

Values shown in brackets represent the ratio of observed YLDs to predicted YLDs on the basis of Socio-Demographic Index (SDI), rounded to two (2) digits. Color ranges (shown below) were calculated to place a roughly equal number of cells into each bin.

| COLOR KEY:                        |                     | [0.0-0.78]           | [0.78-0.88]          | [0.88-0.94]          | [0.94-1.0]           | [1.0-1.06]           | [1.06-1.18]          | [1.18-1.38]          | [1.38-1.66]          | 1.66+                |
|-----------------------------------|---------------------|----------------------|----------------------|----------------------|----------------------|----------------------|----------------------|----------------------|----------------------|----------------------|
|                                   | 1                   | 2                    | 3                    | 4                    | 5                    | 6                    | 7                    | 8                    | 9                    | 10                   |
| Thailand                          | Headaches<br>[0.99] | Neonatal<br>[0.66]   | Dermatitis<br>[0.94] | Conduct<br>[0.95]    | Asthma<br>[0.95]     | Congenital<br>[1.11] | Anxiety<br>[0.76]    | Back Pain<br>[0.76]  | Depression<br>[0.86] | Scabies<br>[4.08]    |
| Timor-Leste                       | Iron<br>[1.39]      | Headaches<br>[0.89]  | Vit A<br>[0.8]       | Neonatal<br>[0.66]   | Dermatitis<br>[0.97] | Conduct<br>[0.92]    | Congenital<br>[1.15] | Asthma<br>[0.91]     | Diarrhea<br>[0.94]   | Anxiety<br>[0.83]    |
| Vietnam                           | Headaches<br>[0.81] | Neonatal<br>[0.62]   | Conduct<br>[0.88]    | Dermatitis<br>[0.83] | Congenital<br>[1.04] | Asthma<br>[0.78]     | Iron<br>[0.45]       | Depression<br>[0.73] | Back Pain<br>[0.66]  | Diarrhea<br>[0.91]   |
| <b>Sub-Saharan Africa</b>         | Iron<br>[1.3]       | Vit A<br>[1.2]       | Neonatal<br>[1.08]   | Dermatitis<br>[0.99] | Headaches<br>[0.78]  | Diarrhea<br>[1.09]   | Congenital<br>[1.17] | Conduct<br>[0.92]    | Anxiety<br>[0.94]    | Epilepsy<br>[1.18]   |
| <b>Central Sub-Saharan Africa</b> | Iron<br>[1.16]      | Vit A<br>[1.44]      | Neonatal<br>[1.19]   | Dermatitis<br>[1.13] | Oncho<br>[226.21]    | Diarrhea<br>[1.32]   | Epilepsy<br>[1.6]    | Malaria<br>[19.93]   | Headaches<br>[0.74]  | Conduct<br>[0.9]     |
| Angola                            | Iron<br>[1.89]      | Vit A<br>[1.25]      | Neonatal<br>[1.35]   | Dermatitis<br>[1.14] | Diarrhea<br>[1.43]   | Epilepsy<br>[1.73]   | Asthma<br>[1.15]     | Headaches<br>[0.7]   | Congenital<br>[1.1]  | Conduct<br>[0.87]    |
| C African Rep                     | Iron<br>[1.27]      | Vit A<br>[1.05]      | Neonatal<br>[1.1]    | Malaria<br>[3.23]    | Diarrhea<br>[1.13]   | Dermatitis<br>[1.12] | Headaches<br>[0.96]  | Epilepsy<br>[1.52]   | Conduct<br>[1.03]    | Depression<br>[1.39] |
| Congo                             | Iron<br>[1.85]      | Vit A<br>[2.57]      | Neonatal<br>[1.29]   | Dermatitis<br>[1.13] | Epilepsy<br>[2.03]   | Asthma<br>[1.22]     | Diarrhea<br>[1.63]   | Headaches<br>[0.7]   | Conduct<br>[0.9]     | Depression<br>[1.14] |
| Congo DR                          | Vit A<br>[1.06]     | Iron<br>[0.69]       | Neonatal<br>[1.28]   | Oncho<br>[149.82]    | Dermatitis<br>[1.14] | Malaria<br>[4.49]    | Diarrhea<br>[1.08]   | Epilepsy<br>[1.43]   | Headaches<br>[0.83]  | Conduct<br>[0.95]    |
| Eq Guinea                         | Iron<br>[1.72]      | Neonatal<br>[0.9]    | Vit A<br>[1.66]      | Dermatitis<br>[1.06] | Epilepsy<br>[2.22]   | Headaches<br>[0.7]   | Conduct<br>[0.95]    | Asthma<br>[1.07]     | Diarrhea<br>[1.68]   | Malaria<br>[430.41]  |
| Gabon                             | Iron<br>[3.79]      | Neonatal<br>[1.38]   | Vit A<br>[2.29]      | Dermatitis<br>[1.05] | Epilepsy<br>[2.35]   | Headaches<br>[0.71]  | Asthma<br>[1.15]     | Diarrhea<br>[1.83]   | Conduct<br>[0.89]    | Depression<br>[1.16] |
| <b>Eastern Sub-Saharan Africa</b> | Iron<br>[0.81]      | Vit A<br>[0.87]      | Neonatal<br>[1.38]   | Dermatitis<br>[1.06] | Congenital<br>[1.17] | Conduct<br>[0.98]    | Diarrhea<br>[0.94]   | Asthma<br>[0.99]     | Anxiety<br>[1.03]    | Depression<br>[1.15] |
| Burundi                           | Iron<br>[0.54]      | Vit A<br>[0.53]      | Neonatal<br>[1.16]   | Dermatitis<br>[1.15] | Diarrhea<br>[0.84]   | Congenital<br>[1.1]  | Conduct<br>[0.96]    | Epilepsy<br>[1.2]    | Anxiety<br>[1.06]    | Asthma<br>[1.0]      |
| Comoros                           | Iron<br>[0.89]      | Neonatal<br>[1.5]    | Vit A<br>[0.78]      | Dermatitis<br>[1.11] | Conduct<br>[0.98]    | Asthma<br>[1.07]     | Diarrhea<br>[1.02]   | Anxiety<br>[1.07]    | Congenital<br>[1.03] | Headaches<br>[0.64]  |
| Djibouti                          | Neonatal<br>[1.4]   | Iron<br>[0.87]       | Dermatitis<br>[1.11] | PEM<br>[13.81]       | Conduct<br>[0.89]    | Congenital<br>[1.07] | Asthma<br>[0.9]      | Epilepsy<br>[1.3]    | Anxiety<br>[0.92]    | Depression<br>[1.06] |
| Eritrea                           | Iron<br>[1.25]      | Neonatal<br>[1.52]   | Vit A<br>[0.78]      | Dermatitis<br>[1.11] | Conduct<br>[0.98]    | Diarrhea<br>[0.99]   | Anxiety<br>[1.06]    | Depression<br>[1.22] | Congenital<br>[1.05] | Epilepsy<br>[1.24]   |
| Ethiopia                          | Vit A<br>[0.94]     | Iron<br>[0.61]       | Neonatal<br>[1.5]    | Dermatitis<br>[1.07] | Conduct<br>[1.06]    | Diarrhea<br>[0.87]   | Congenital<br>[1.06] | Anxiety<br>[1.08]    | Asthma<br>[0.91]     | Depression<br>[1.1]  |
| Kenya                             | Neonatal<br>[1.62]  | Vit A<br>[1.03]      | Dermatitis<br>[1.15] | Congenital<br>[1.55] | Conduct<br>[1.02]    | Iron<br>[0.43]       | Diarrhea<br>[1.16]   | Anxiety<br>[1.01]    | Headaches<br>[0.6]   | Depression<br>[0.98] |
| Baringo                           | Neonatal<br>[1.64]  | Vit A<br>[0.95]      | Dermatitis<br>[1.11] | Congenital<br>[1.5]  | Conduct<br>[1.1]     | Diarrhea<br>[1.14]   | Anxiety<br>[1.08]    | Headaches<br>[0.67]  | Depression<br>[1.04] | Asthma<br>[0.74]     |
| Bomet                             | Neonatal<br>[1.89]  | Dermatitis<br>[1.12] | Congenital<br>[1.52] | Vit A<br>[0.7]       | Conduct<br>[1.0]     | Anxiety<br>[1.0]     | Diarrhea<br>[1.05]   | Headaches<br>[0.6]   | Asthma<br>[0.76]     | Depression<br>[0.95] |
| Bungoma                           | Neonatal<br>[1.71]  | Vit A<br>[1.18]      | Iron<br>[0.49]       | Dermatitis<br>[1.13] | Congenital<br>[1.52] | Conduct<br>[1.02]    | Diarrhea<br>[1.11]   | Anxiety<br>[1.0]     | Headaches<br>[0.6]   | Asthma<br>[0.75]     |
| Busia                             | Neonatal<br>[1.68]  | Vit A<br>[1.0]       | Iron<br>[0.53]       | Dermatitis<br>[1.12] | Congenital<br>[1.51] | Conduct<br>[1.03]    | Diarrhea<br>[1.08]   | Anxiety<br>[1.03]    | Headaches<br>[0.63]  | Schisto<br>[78.59]   |
| Elgeyo-Marakwet                   | Neonatal<br>[1.83]  | Dermatitis<br>[1.13] | Congenital<br>[1.52] | Conduct<br>[1.07]    | Vit A<br>[0.63]      | Anxiety<br>[1.05]    | Diarrhea<br>[1.1]    | Headaches<br>[0.63]  | Depression<br>[1.02] | Epilepsy<br>[1.16]   |
| Embu                              | Neonatal<br>[1.77]  | Vit A<br>[1.09]      | Dermatitis<br>[1.13] | Congenital<br>[1.53] | Conduct<br>[1.05]    | Anxiety<br>[1.03]    | Diarrhea<br>[1.23]   | Iron<br>[0.44]       | Headaches<br>[0.62]  | Depression<br>[1.02] |
| Garissa                           | Neonatal<br>[2.03]  | Vit A<br>[0.61]      | Iron<br>[0.47]       | Congenital<br>[1.52] | Dermatitis<br>[1.13] | Conduct<br>[1.11]    | Anxiety<br>[1.06]    | Headaches<br>[0.69]  | Diarrhea<br>[0.67]   | Depression<br>[0.99] |
| HomaBay                           | Vit A<br>[1.05]     | Neonatal<br>[1.12]   | Iron<br>[0.56]       | HIV<br>[102.92]      | Congenital<br>[1.54] | Dermatitis<br>[1.12] | Diarrhea<br>[1.23]   | Conduct<br>[1.03]    | Anxiety<br>[1.02]    | Headaches<br>[0.63]  |
| Isiolo                            | Neonatal<br>[1.52]  | Vit A<br>[0.76]      | Iron<br>[0.45]       | Congenital<br>[1.51] | Dermatitis<br>[1.13] | Conduct<br>[1.07]    | Diarrhea<br>[0.97]   | Anxiety<br>[1.05]    | Headaches<br>[0.67]  | Depression<br>[1.0]  |
| Kajiado                           | Neonatal<br>[1.92]  | Vit A<br>[1.29]      | Iron<br>[0.63]       | Dermatitis<br>[1.14] | Congenital<br>[1.55] | Conduct<br>[0.98]    | Anxiety<br>[0.96]    | Headaches<br>[0.57]  | Epilepsy<br>[1.26]   | Diarrhea<br>[1.02]   |
| Kakamega                          | Neonatal<br>[1.48]  | Vit A<br>[1.19]      | Iron<br>[0.68]       | Dermatitis<br>[1.12] | Congenital<br>[1.52] | Diarrhea<br>[1.2]    | Conduct<br>[1.02]    | Anxiety<br>[1.01]    | Headaches<br>[0.62]  | Depression<br>[0.96] |
| Kericho                           | Neonatal<br>[2.0]   | Dermatitis<br>[1.13] | Congenital<br>[1.55] | Vit A<br>[0.78]      | Conduct<br>[0.99]    | Diarrhea<br>[1.25]   | Anxiety<br>[0.97]    | Headaches<br>[0.57]  | Asthma<br>[0.76]     | Depression<br>[0.93] |
| Kiambu                            | Neonatal<br>[1.87]  | Dermatitis<br>[1.14] | Congenital<br>[1.56] | Conduct<br>[0.98]    | Anxiety<br>[0.96]    | Headaches<br>[0.56]  | Diarrhea<br>[1.21]   | Epilepsy<br>[1.33]   | Depression<br>[0.94] | Asthma<br>[0.75]     |

**eFigure 9a. Leading ten causes of YLDs with the ratio of observed YLDs to YLDs expected on the basis of Socio-Demographic Index alone in 2017, <20 years, both sexes combined.** The top ten causes contributing to YLDs are listed globally, by socio-demographic quintile, and then by GBD superregion, region, country, and subnationally where modeled. For each cell, the ratio of observed YLDs to YLDs expected on the basis of socio-demographic index (SDI) alone are listed. Abbreviations: YLD=year of life lived with disability, GBD=Global Burden of Disease.

Values shown in brackets represent the ratio of observed YLDs to predicted YLDs on the basis of Socio-Demographic Index (SDI), rounded to two (2) digits. Color ranges (shown below) were calculated to place a roughly equal number of cells into each bin.

| COLOR KEY:   |                    | [0.0-0.78]           | [0.78-0.88]          | [0.88-0.94]          | [0.94-1.0]           | [1.0-1.06]           | [1.06-1.18]         | [1.18-1.38]          | [1.38-1.66]          | 1.66+                |
|--------------|--------------------|----------------------|----------------------|----------------------|----------------------|----------------------|---------------------|----------------------|----------------------|----------------------|
|              | 1                  | 2                    | 3                    | 4                    | 5                    | 6                    | 7                   | 8                    | 9                    | 10                   |
| Kilifi       | Neonatal<br>[1.63] | Vit A<br>[0.97]      | Iron<br>[0.52]       | Dermatitis<br>[1.13] | Congenital<br>[1.51] | Conduct<br>[1.03]    | Diarrhea<br>[1.06]  | Anxiety<br>[1.02]    | Headaches<br>[0.62]  | Depression<br>[0.96] |
| Kirinyaga    | Neonatal<br>[1.84] | Dermatitis<br>[1.13] | Congenital<br>[1.55] | Conduct<br>[1.02]    | Diarrhea<br>[1.42]   | Anxiety<br>[1.01]    | Headaches<br>[0.6]  | Depression<br>[0.98] | Epilepsy<br>[1.22]   | Vit A<br>[0.57]      |
| Kisii        | Neonatal<br>[1.45] | Dermatitis<br>[1.13] | Vit A<br>[0.89]      | Congenital<br>[1.53] | Conduct<br>[1.05]    | Anxiety<br>[1.04]    | Diarrhea<br>[1.24]  | Headaches<br>[0.62]  | Depression<br>[1.02] | Epilepsy<br>[1.15]   |
| Kisumu       | Vit A<br>[1.31]    | Neonatal<br>[1.1]    | Iron<br>[0.7]        | Congenital<br>[1.54] | Conduct<br>[1.04]    | Dermatitis<br>[0.93] | Anxiety<br>[1.04]   | Diarrhea<br>[1.1]    | Headaches<br>[0.63]  | HIV<br>[103.37]      |
| Kitui        | Neonatal<br>[1.91] | Dermatitis<br>[1.12] | Congenital<br>[1.51] | Conduct<br>[1.06]    | Diarrhea<br>[1.12]   | Vit A<br>[0.52]      | Anxiety<br>[1.06]   | Headaches<br>[0.65]  | Depression<br>[1.02] | Epilepsy<br>[1.05]   |
| Kwale        | Neonatal<br>[1.65] | Iron<br>[0.67]       | Vit A<br>[0.95]      | Dermatitis<br>[1.13] | Congenital<br>[1.49] | Conduct<br>[1.04]    | Anxiety<br>[1.03]   | Diarrhea<br>[0.95]   | Headaches<br>[0.62]  | Depression<br>[0.98] |
| Laikipia     | Neonatal<br>[1.93] | Dermatitis<br>[1.14] | Congenital<br>[1.54] | Conduct<br>[1.02]    | Anxiety<br>[0.98]    | Diarrhea<br>[1.24]   | Headaches<br>[0.58] | Vit A<br>[0.7]       | Asthma<br>[0.79]     | Depression<br>[0.97] |
| Lamu         | Neonatal<br>[1.45] | Dermatitis<br>[1.11] | Vit A<br>[0.66]      | Congenital<br>[1.5]  | Conduct<br>[1.09]    | Anxiety<br>[1.08]    | Diarrhea<br>[1.06]  | Iron<br>[0.32]       | Headaches<br>[0.67]  | Depression<br>[1.05] |
| Machakos     | Neonatal<br>[1.81] | Dermatitis<br>[1.13] | Congenital<br>[1.52] | Conduct<br>[1.05]    | Vit A<br>[0.71]      | Diarrhea<br>[1.23]   | Anxiety<br>[1.02]   | Headaches<br>[0.61]  | Depression<br>[1.0]  | Epilepsy<br>[1.16]   |
| Makueni      | Neonatal<br>[1.8]  | Dermatitis<br>[1.11] | Congenital<br>[1.51] | Conduct<br>[1.06]    | Anxiety<br>[1.05]    | Headaches<br>[0.65]  | Vit A<br>[0.47]     | Diarrhea<br>[0.91]   | Depression<br>[1.03] | HIV<br>[80.61]       |
| Mandera      | Vit A<br>[0.69]    | Neonatal<br>[1.65]   | Iron<br>[0.49]       | Congenital<br>[1.49] | Dermatitis<br>[1.11] | Conduct<br>[1.22]    | Anxiety<br>[1.16]   | Headaches<br>[0.8]   | Diarrhea<br>[0.68]   | Depression<br>[1.14] |
| Marsabit     | Neonatal<br>[2.11] | Vit A<br>[0.55]      | Congenital<br>[1.5]  | Dermatitis<br>[1.13] | Conduct<br>[1.1]     | Diarrhea<br>[0.85]   | Anxiety<br>[1.09]   | Iron<br>[0.23]       | PEM<br>[2.93]        | Headaches<br>[0.71]  |
| Meru         | Neonatal<br>[1.8]  | Vit A<br>[1.04]      | Dermatitis<br>[1.12] | Congenital<br>[1.53] | Conduct<br>[1.06]    | Diarrhea<br>[1.34]   | Anxiety<br>[1.05]   | Headaches<br>[0.64]  | Depression<br>[1.04] | Epilepsy<br>[1.15]   |
| Migori       | Vit A<br>[1.06]    | Neonatal<br>[1.08]   | Iron<br>[0.43]       | Congenital<br>[1.54] | Dermatitis<br>[1.13] | Diarrhea<br>[1.17]   | Conduct<br>[1.0]    | HIV<br>[69.89]       | Anxiety<br>[1.0]     | Headaches<br>[0.61]  |
| Mombasa      | Neonatal<br>[1.53] | Iron<br>[0.83]       | Vit A<br>[1.19]      | Dermatitis<br>[1.14] | Congenital<br>[1.55] | Conduct<br>[0.96]    | Diarrhea<br>[1.36]  | Anxiety<br>[0.96]    | Headaches<br>[0.57]  | Epilepsy<br>[1.3]    |
| Murang'a     | Neonatal<br>[1.82] | Dermatitis<br>[1.12] | Congenital<br>[1.54] | Conduct<br>[1.09]    | Anxiety<br>[1.06]    | Headaches<br>[0.65]  | Diarrhea<br>[1.14]  | Depression<br>[1.06] | Epilepsy<br>[1.16]   | Asthma<br>[0.74]     |
| Nairobi      | Neonatal<br>[1.74] | Dermatitis<br>[1.36] | Congenital<br>[1.48] | Conduct<br>[0.91]    | Anxiety<br>[0.82]    | Headaches<br>[0.52]  | Epilepsy<br>[1.67]  | Vit A<br>[1.25]      | Depression<br>[0.87] | Asthma<br>[0.76]     |
| Nakuru       | Neonatal<br>[1.77] | Dermatitis<br>[1.14] | Congenital<br>[1.56] | Conduct<br>[1.02]    | Epilepsy<br>[1.74]   | Diarrhea<br>[1.33]   | Anxiety<br>[0.99]   | Vit A<br>[0.7]       | Headaches<br>[0.59]  | Asthma<br>[0.78]     |
| Nandi        | Neonatal<br>[1.9]  | Dermatitis<br>[1.13] | Congenital<br>[1.53] | Vit A<br>[0.77]      | Conduct<br>[1.04]    | Anxiety<br>[1.03]    | Headaches<br>[0.62] | Diarrhea<br>[1.05]   | Depression<br>[1.0]  | Asthma<br>[0.75]     |
| Narok        | Neonatal<br>[2.19] | Vit A<br>[0.96]      | Dermatitis<br>[1.13] | Congenital<br>[1.51] | Conduct<br>[0.99]    | Iron<br>[0.28]       | Diarrhea<br>[0.94]  | Anxiety<br>[0.99]    | Headaches<br>[0.61]  | Asthma<br>[0.8]      |
| Nyamira      | Neonatal<br>[1.66] | Dermatitis<br>[1.14] | Congenital<br>[1.55] | Conduct<br>[1.02]    | Diarrhea<br>[1.4]    | Anxiety<br>[1.0]     | Headaches<br>[0.59] | Epilepsy<br>[1.39]   | Depression<br>[0.99] | Asthma<br>[0.76]     |
| Nyandarua    | Neonatal<br>[1.92] | Dermatitis<br>[1.12] | Congenital<br>[1.55] | Conduct<br>[1.07]    | Anxiety<br>[1.04]    | Headaches<br>[0.63]  | Diarrhea<br>[1.17]  | Epilepsy<br>[1.4]    | Depression<br>[1.07] | Vit A<br>[0.61]      |
| Nyeri        | Neonatal<br>[1.8]  | Dermatitis<br>[1.12] | Congenital<br>[1.55] | Conduct<br>[1.08]    | Anxiety<br>[1.05]    | Headaches<br>[0.64]  | Epilepsy<br>[1.38]  | Depression<br>[1.06] | Diarrhea<br>[1.11]   | Asthma<br>[0.74]     |
| Samburu      | Neonatal<br>[2.29] | Vit A<br>[0.57]      | Congenital<br>[1.52] | Dermatitis<br>[1.15] | Iron<br>[0.32]       | Diarrhea<br>[0.91]   | Conduct<br>[1.06]   | Anxiety<br>[1.05]    | Headaches<br>[0.68]  | Asthma<br>[0.81]     |
| Siaya        | Neonatal<br>[1.18] | Vit A<br>[1.02]      | Dermatitis<br>[1.12] | Iron<br>[0.45]       | Congenital<br>[1.52] | Conduct<br>[1.03]    | Diarrhea<br>[1.17]  | Anxiety<br>[1.02]    | Headaches<br>[0.62]  | Asthma<br>[0.79]     |
| TaitaTaveta  | Neonatal<br>[1.65] | Dermatitis<br>[1.13] | Congenital<br>[1.53] | Conduct<br>[1.09]    | Anxiety<br>[1.06]    | Headaches<br>[0.63]  | Diarrhea<br>[1.14]  | Epilepsy<br>[1.36]   | Depression<br>[1.05] | Asthma<br>[0.73]     |
| TanaRiver    | Iron<br>[0.89]     | Vit A<br>[1.13]      | Neonatal<br>[1.8]    | Congenital<br>[1.51] | Dermatitis<br>[1.13] | Conduct<br>[1.07]    | Diarrhea<br>[0.95]  | Anxiety<br>[1.06]    | Headaches<br>[0.67]  | Epilepsy<br>[1.06]   |
| TharakaNithi | Neonatal<br>[1.45] | Dermatitis<br>[1.13] | Congenital<br>[1.53] | Conduct<br>[1.07]    | Anxiety<br>[1.06]    | Diarrhea<br>[1.29]   | Vit A<br>[0.71]     | Headaches<br>[0.63]  | Depression<br>[1.06] | Epilepsy<br>[1.3]    |
| TransNzoia   | Neonatal<br>[1.8]  | Dermatitis<br>[1.12] | Vit A<br>[0.81]      | Congenital<br>[1.51] | Conduct<br>[1.04]    | Diarrhea<br>[1.32]   | Anxiety<br>[1.03]   | Headaches<br>[0.62]  | Depression<br>[1.01] | Asthma<br>[0.75]     |
| Turkana      | Neonatal<br>[1.99] | Vit A<br>[0.63]      | Iron<br>[0.37]       | Congenital<br>[1.53] | Dermatitis<br>[1.13] | Diarrhea<br>[0.91]   | Conduct<br>[1.12]   | Anxiety<br>[1.09]    | PEM<br>[1.96]        | Headaches<br>[0.73]  |
| UasinGishu   | Neonatal<br>[1.74] | Dermatitis<br>[1.64] | Vit A<br>[1.0]       | Congenital<br>[1.53] | Conduct<br>[1.0]     | Diarrhea<br>[1.32]   | Anxiety<br>[0.99]   | Headaches<br>[0.59]  | Iron<br>[0.41]       | Depression<br>[0.96] |

**eFigure 9a. Leading ten causes of YLDs with the ratio of observed YLDs to YLDs expected on the basis of Socio-Demographic Index alone in 2017, <20 years, both sexes combined.** The top ten causes contributing to YLDs are listed globally, by socio-demographic quintile, and then by GBD superregion, region, country, and subnationally where modeled. For each cell, the ratio of observed YLDs to YLDs expected on the basis of socio-demographic index (SDI) alone are listed. Abbreviations: YLD=year of life lived with disability, GBD=Global Burden of Disease.

Values shown in brackets represent the ratio of observed YLDs to predicted YLDs on the basis of Socio-Demographic Index (SDI), rounded to two (2) digits. Color ranges (shown below) were calculated to place a roughly equal number of cells into each bin.

| COLOR KEY:                         |                    | [0.0-0.78]           | [0.78-0.88]          | [0.88-0.94]          | [0.94-1.0]           | [1.0-1.06]           | [1.06-1.18]          | [1.18-1.38]          | [1.38-1.66]          | 1.66+                |
|------------------------------------|--------------------|----------------------|----------------------|----------------------|----------------------|----------------------|----------------------|----------------------|----------------------|----------------------|
|                                    | 1                  | 2                    | 3                    | 4                    | 5                    | 6                    | 7                    | 8                    | 9                    | 10                   |
| Vihiga                             | Neonatal<br>[1.66] | Vit A<br>[0.98]      | Dermatitis<br>[1.11] | Congenital<br>[1.51] | Conduct<br>[1.07]    | Iron<br>[0.41]       | Diarrhea<br>[1.14]   | Anxiety<br>[1.07]    | Headaches<br>[0.66]  | Depression<br>[1.04] |
| Wajir                              | Neonatal<br>[2.04] | Vit A<br>[0.48]      | Congenital<br>[1.52] | Dermatitis<br>[1.14] | Conduct<br>[1.18]    | Iron<br>[0.22]       | Diarrhea<br>[0.65]   | Anxiety<br>[1.12]    | Headaches<br>[0.77]  | Depression<br>[1.04] |
| WestPokot                          | Neonatal<br>[2.05] | Vit A<br>[0.81]      | Congenital<br>[1.51] | Dermatitis<br>[1.13] | Iron<br>[0.31]       | Diarrhea<br>[1.05]   | Conduct<br>[1.05]    | Anxiety<br>[1.05]    | Headaches<br>[0.66]  | Depression<br>[0.99] |
| Madagascar                         | Iron<br>[0.8]      | Congenital<br>[2.54] | Neonatal<br>[1.45]   | Vit A<br>[0.61]      | Diarrhea<br>[1.1]    | Dermatitis<br>[1.13] | Asthma<br>[1.13]     | Conduct<br>[0.95]    | Epilepsy<br>[1.25]   | Anxiety<br>[1.04]    |
| Malawi                             | Iron<br>[1.19]     | Vit A<br>[0.84]      | Neonatal<br>[1.28]   | Diarrhea<br>[1.21]   | Dermatitis<br>[1.13] | HIV<br>[55.32]       | Conduct<br>[0.96]    | Congenital<br>[1.09] | Anxiety<br>[1.07]    | Asthma<br>[0.98]     |
| Mozambique                         | Iron<br>[0.96]     | Vit A<br>[0.89]      | Neonatal<br>[1.21]   | HIV<br>[54.33]       | Dermatitis<br>[0.95] | Epilepsy<br>[1.46]   | Malaria<br>[2.48]    | Conduct<br>[0.99]    | Anxiety<br>[1.09]    | Congenital<br>[1.04] |
| Rwanda                             | Iron<br>[0.69]     | Neonatal<br>[1.33]   | Vit A<br>[0.66]      | Asthma<br>[1.32]     | Conduct<br>[0.93]    | Depression<br>[1.24] | Congenital<br>[1.08] | Anxiety<br>[1.02]    | Diarrhea<br>[0.88]   | Epilepsy<br>[1.24]   |
| Somalia                            | Iron<br>[0.85]     | Vit A<br>[0.71]      | Neonatal<br>[1.44]   | Dermatitis<br>[1.14] | Congenital<br>[1.06] | Diarrhea<br>[0.67]   | Conduct<br>[1.0]     | Anxiety<br>[1.08]    | Epilepsy<br>[1.04]   | Depression<br>[1.17] |
| S Sudan                            | Iron<br>[0.9]      | Vit A<br>[0.75]      | Oncho<br>[84.59]     | Neonatal<br>[1.34]   | Diarrhea<br>[1.1]    | Dermatitis<br>[1.14] | Asthma<br>[1.11]     | Conduct<br>[0.99]    | Congenital<br>[1.02] | PEM<br>[1.82]        |
| Tanzania                           | Iron<br>[1.22]     | Neonatal<br>[1.29]   | Vit A<br>[0.76]      | Asthma<br>[1.28]     | Dermatitis<br>[0.95] | Conduct<br>[0.9]     | Anxiety<br>[0.99]    | Epilepsy<br>[1.18]   | Depression<br>[1.11] | Congenital<br>[0.89] |
| Uganda                             | Iron<br>[0.84]     | Neonatal<br>[1.31]   | Vit A<br>[0.73]      | Dermatitis<br>[1.09] | Depression<br>[1.59] | Epilepsy<br>[1.43]   | Asthma<br>[1.1]      | Malaria<br>[5.76]    | Diarrhea<br>[0.96]   | Conduct<br>[0.93]    |
| Zambia                             | Iron<br>[0.9]      | Vit A<br>[1.32]      | Neonatal<br>[1.15]   | Dermatitis<br>[1.12] | Diarrhea<br>[1.2]    | Epilepsy<br>[1.5]    | Headaches<br>[0.73]  | Conduct<br>[0.89]    | Congenital<br>[1.07] | Anxiety<br>[0.97]    |
| <b>Southern Sub-Saharan Africa</b> | Neonatal<br>[1.07] | Dermatitis<br>[1.29] | Iron<br>[1.07]       | Vit A<br>[1.7]       | Headaches<br>[0.7]   | Conduct<br>[0.93]    | Congenital<br>[1.21] | Anxiety<br>[0.9]     | HIV<br>[248.67]      | Depression<br>[0.91] |
| Botswana                           | Iron<br>[2.34]     | Neonatal<br>[1.29]   | Dermatitis<br>[1.28] | Vit A<br>[2.07]      | Headaches<br>[0.7]   | Conduct<br>[0.91]    | Anxiety<br>[0.85]    | Depression<br>[1.02] | Diarrhea<br>[1.39]   | Congenital<br>[0.84] |
| Lesotho                            | Iron<br>[0.94]     | Vit A<br>[1.2]       | Neonatal<br>[0.95]   | Dermatitis<br>[1.36] | Depression<br>[1.83] | HIV<br>[150.1]       | Headaches<br>[0.81]  | Conduct<br>[0.96]    | Diarrhea<br>[1.14]   | Anxiety<br>[1.02]    |
| Namibia                            | Iron<br>[1.75]     | Neonatal<br>[1.12]   | Dermatitis<br>[1.34] | Headaches<br>[0.71]  | Diarrhea<br>[1.67]   | Conduct<br>[0.9]     | Anxiety<br>[0.9]     | Vit A<br>[1.05]      | Depression<br>[0.89] | HIV<br>[188.47]      |
| S Africa                           | Neonatal<br>[1.1]  | Dermatitis<br>[1.24] | Headaches<br>[0.69]  | Congenital<br>[1.43] | Vit A<br>[1.84]      | Conduct<br>[0.95]    | Anxiety<br>[0.91]    | HIV<br>[339.23]      | Depression<br>[0.92] | Iron<br>[0.8]        |
| Swaziland                          | Iron<br>[1.2]      | Neonatal<br>[0.91]   | Dermatitis<br>[1.37] | Vit A<br>[1.27]      | HIV<br>[246.47]      | Headaches<br>[0.74]  | Diarrhea<br>[1.6]    | Conduct<br>[0.93]    | Anxiety<br>[0.95]    | Depression<br>[1.12] |
| Zimbabwe                           | Iron<br>[0.79]     | Neonatal<br>[1.13]   | Vit A<br>[0.86]      | Dermatitis<br>[1.37] | Diarrhea<br>[1.29]   | Headaches<br>[0.79]  | Conduct<br>[0.93]    | Anxiety<br>[0.89]    | Congenital<br>[0.76] | HIV<br>[58.79]       |
| <b>Western Sub-Saharan Africa</b>  | Iron<br>[1.73]     | Vit A<br>[1.27]      | Neonatal<br>[0.85]   | Headaches<br>[0.98]  | Diarrhea<br>[1.1]    | Congenital<br>[1.17] | Dermatitis<br>[0.85] | Conduct<br>[0.9]     | Malaria<br>[12.57]   | Hemog<br>[2.33]      |
| Benin                              | Iron<br>[1.08]     | Vit A<br>[1.05]      | Neonatal<br>[1.2]    | Malaria<br>[5.54]    | Headaches<br>[1.0]   | Dermatitis<br>[0.92] | Conduct<br>[0.94]    | Epilepsy<br>[1.2]    | Congenital<br>[0.97] | Back Pain<br>[1.12]  |
| Burkina Faso                       | Iron<br>[1.56]     | Vit A<br>[1.0]       | Malaria<br>[1.83]    | Neonatal<br>[1.02]   | Headaches<br>[1.11]  | Diarrhea<br>[0.92]   | Dermatitis<br>[0.93] | Hemog<br>[1.74]      | Conduct<br>[0.96]    | Congenital<br>[0.97] |
| Cameroon                           | Iron<br>[1.13]     | Vit A<br>[1.39]      | Neonatal<br>[0.8]    | Headaches<br>[0.96]  | Diarrhea<br>[1.51]   | Dermatitis<br>[0.92] | Conduct<br>[0.93]    | Malaria<br>[28.78]   | Epilepsy<br>[1.36]   | Oncho<br>[183.02]    |
| Cape Verde                         | Iron<br>[1.37]     | Neonatal<br>[1.43]   | Headaches<br>[1.01]  | Conduct<br>[0.98]    | Dermatitis<br>[0.91] | Anxiety<br>[0.94]    | Diarrhea<br>[1.18]   | Back Pain<br>[1.02]  | Depression<br>[1.05] | Epilepsy<br>[1.32]   |
| Chad                               | Iron<br>[1.6]      | Vit A<br>[0.83]      | Diarrhea<br>[1.29]   | Neonatal<br>[0.9]    | Headaches<br>[1.09]  | Dermatitis<br>[0.94] | Conduct<br>[0.94]    | Congenital<br>[0.95] | Back Pain<br>[1.36]  | Epilepsy<br>[0.97]   |
| Cote d'Ivoire                      | Iron<br>[1.42]     | Vit A<br>[1.24]      | Neonatal<br>[0.98]   | Headaches<br>[0.98]  | Diarrhea<br>[1.25]   | Dermatitis<br>[0.91] | Conduct<br>[0.93]    | Epilepsy<br>[1.23]   | Congenital<br>[1.01] | Hemog<br>[2.03]      |
| Gambia                             | Iron<br>[1.73]     | Vit A<br>[1.33]      | Neonatal<br>[1.54]   | Headaches<br>[1.05]  | Diarrhea<br>[1.18]   | Dermatitis<br>[0.91] | Conduct<br>[0.96]    | Depression<br>[1.18] | Anxiety<br>[0.94]    | Congenital<br>[0.94] |
| Ghana                              | Iron<br>[2.11]     | Vit A<br>[2.14]      | Neonatal<br>[1.11]   | Headaches<br>[0.93]  | Diarrhea<br>[1.34]   | Conduct<br>[0.91]    | Epilepsy<br>[1.39]   | Anxiety<br>[0.87]    | Congenital<br>[1.01] | Malaria<br>[82.53]   |
| Guinea                             | Iron<br>[1.15]     | Vit A<br>[0.86]      | Neonatal<br>[1.02]   | Malaria<br>[2.34]    | Headaches<br>[1.08]  | Diarrhea<br>[0.95]   | Dermatitis<br>[0.93] | Conduct<br>[0.96]    | Hemog<br>[1.74]      | Congenital<br>[0.97] |
| Guinea-Bissau                      | Iron<br>[1.29]     | Vit A<br>[1.09]      | Neonatal<br>[1.24]   | Headaches<br>[1.06]  | Dermatitis<br>[0.93] | Diarrhea<br>[0.88]   | Conduct<br>[0.94]    | Congenital<br>[1.03] | Epilepsy<br>[1.16]   | Anxiety<br>[0.93]    |
| Liberia                            | Iron<br>[1.18]     | Oncho<br>[208.34]    | Vit A<br>[0.73]      | Neonatal<br>[1.21]   | Diarrhea<br>[1.34]   | Headaches<br>[1.12]  | Dermatitis<br>[0.92] | Epilepsy<br>[1.38]   | Conduct<br>[0.99]    | Hemog<br>[1.85]      |

**eFigure 9a. Leading ten causes of YLDs with the ratio of observed YLDs to YLDs expected on the basis of Socio-Demographic Index alone in 2017, <20 years, both sexes combined.** The top ten causes contributing to YLDs are listed globally, by socio-demographic quintile, and then by GBD superregion, region, country, and subnationally where modeled. For each cell, the ratio of observed YLDs to YLDs expected on the basis of socio-demographic index (SDI) alone are listed. Abbreviations: YLD=year of life lived with disability, GBD=Global Burden of Disease.

Values shown in brackets represent the ratio of observed YLDs to predicted YLDs on the basis of Socio-Demographic Index (SDI), rounded to two (2) digits. Color ranges (shown below) were calculated to place a roughly equal number of cells into each bin.

| COLOR KEY:        |                | [0.0-0.78]         | [0.78-0.88]         | [0.88-0.94]         | [0.94-1.0]          | [1.0-1.06]           | [1.06-1.18]          | [1.18-1.38]          | [1.38-1.66]          | 1.66+                |
|-------------------|----------------|--------------------|---------------------|---------------------|---------------------|----------------------|----------------------|----------------------|----------------------|----------------------|
|                   | 1              | 2                  | 3                   | 4                   | 5                   | 6                    | 7                    | 8                    | 9                    | 10                   |
| Mali              | Iron<br>[1.69] | Vit A<br>[1.03]    | Neonatal<br>[0.98]  | Headaches<br>[1.14] | Malaria<br>[1.23]   | Diarrhea<br>[0.8]    | Conduct<br>[0.97]    | Dermatitis<br>[0.81] | Congenital<br>[0.96] | Anxiety<br>[0.95]    |
| Mauritania        | Iron<br>[1.42] | PEM<br>[27.03]     | Neonatal<br>[1.3]   | Vit A<br>[1.23]     | Headaches<br>[0.97] | Diarrhea<br>[1.24]   | Dermatitis<br>[0.92] | Conduct<br>[0.93]    | Asthma<br>[0.93]     | Epilepsy<br>[1.26]   |
| Niger             | Iron<br>[1.02] | Vit A<br>[0.71]    | Neonatal<br>[0.97]  | Diarrhea<br>[0.76]  | Malaria<br>[1.03]   | Headaches<br>[1.16]  | Dermatitis<br>[0.96] | Conduct<br>[0.96]    | Congenital<br>[0.92] | PEM<br>[0.87]        |
| Nigeria           | Iron<br>[2.24] | Vit A<br>[1.45]    | Headaches<br>[0.94] | Neonatal<br>[0.68]  | Congenital<br>[1.4] | Hemog<br>[3.21]      | Dermatitis<br>[0.84] | Back Pain<br>[1.17]  | Conduct<br>[0.87]    | Diarrhea<br>[1.0]    |
| Sao Tome Principe | Iron<br>[0.94] | Neonatal<br>[1.27] | Vit A<br>[1.29]     | Headaches<br>[1.0]  | Diarrhea<br>[1.28]  | Dermatitis<br>[0.92] | Conduct<br>[0.97]    | Anxiety<br>[0.94]    | Epilepsy<br>[1.29]   | Congenital<br>[0.98] |
| Senegal           | Iron<br>[1.48] | Vit A<br>[0.94]    | Neonatal<br>[1.48]  | Diarrhea<br>[1.28]  | Headaches<br>[1.06] | Dermatitis<br>[0.91] | Conduct<br>[0.97]    | Congenital<br>[0.97] | Epilepsy<br>[1.12]   | Anxiety<br>[0.93]    |
| Sierra Leone      | Iron<br>[1.4]  | Vit A<br>[0.94]    | Malaria<br>[4.86]   | Headaches<br>[1.11] | Neonatal<br>[0.87]  | Hemog<br>[2.32]      | Dermatitis<br>[0.92] | Diarrhea<br>[0.93]   | Conduct<br>[0.97]    | Epilepsy<br>[1.19]   |
| Togo              | Iron<br>[1.16] | Vit A<br>[1.14]    | Neonatal<br>[1.18]  | Malaria<br>[15.31]  | Headaches<br>[1.01] | Diarrhea<br>[1.26]   | Dermatitis<br>[0.91] | Conduct<br>[0.96]    | Epilepsy<br>[1.23]   | Congenital<br>[0.98] |

**eFigure 9b. Leading ten causes of YLDs with the ratio of observed YLDs to YLDs expected on the basis of Socio-Demographic Index alone in 2017, <1 years, both sexes combined.**  
The top ten causes contributing to YLDs are listed globally, by socio-demographic quintile, and then by GBD superregion, region, country, and subnationally where modeled. For each cell, the ratio of observed YLDs to YLDs expected on the basis of socio-demographic index (SDI) alone are listed. Abbreviations: YLD=year of life lived with disability, GBD=Global Burden of Disease.

Values shown in brackets represent the ratio of observed YLDs to predicted YLDs on the basis of Socio-Demographic Index (SDI), rounded to two (2) digits. Color ranges (shown below) were calculated to place a roughly equal number of cells into each bin.

| COLOR KEY:                                       |                    | [0.0-0.68]           | [0.68-0.82]          | [0.82-0.91]          | [0.91-1.01]          | [1.01-1.1]          | [1.1-1.21]          | [1.21-1.45]         | [1.45-2.25]         | 2.25+               |
|--------------------------------------------------|--------------------|----------------------|----------------------|----------------------|----------------------|---------------------|---------------------|---------------------|---------------------|---------------------|
|                                                  | 1                  | 2                    | 3                    | 4                    | 5                    | 6                   | 7                   | 8                   | 9                   | 10                  |
| Global                                           | Neonatal<br>[1.38] | Vit A<br>[1.88]      | Iron<br>[2.11]       | Diarrhea<br>[1.3]    | Congenital<br>[0.95] | PEM<br>[12.99]      | URI<br>[0.88]       | Epilepsy<br>[1.09]  | Urticaria<br>[0.84] | Hemog<br>[2.77]     |
| Low SDI                                          | Vit A<br>[1.15]    | Iron<br>[1.34]       | Neonatal<br>[1.28]   | Diarrhea<br>[0.89]   | Congenital<br>[1.09] | PEM<br>[1.35]       | Hemog<br>[1.53]     | ID<br>[3.11]        | URI<br>[0.96]       | Epilepsy<br>[0.97]  |
| Low-middle SDI                                   | Neonatal<br>[1.34] | Iron<br>[1.73]       | Vit A<br>[1.16]      | Diarrhea<br>[1.08]   | Congenital<br>[1.02] | PEM<br>[3.14]       | Hemog<br>[2.2]      | Epilepsy<br>[1.06]  | URI<br>[0.84]       | Urticaria<br>[0.88] |
| Middle SDI                                       | Neonatal<br>[1.26] | Vit A<br>[1.21]      | Diarrhea<br>[1.26]   | Congenital<br>[0.83] | Iron<br>[1.01]       | PEM<br>[13.88]      | URI<br>[0.91]       | Urticaria<br>[0.85] | Epilepsy<br>[1.07]  | ASD<br>[0.73]       |
| High-middle SDI                                  | Neonatal<br>[1.66] | Diarrhea<br>[2.33]   | Congenital<br>[0.92] | Vit A<br>[3.85]      | Iron<br>[4.22]       | URI<br>[0.81]       | Urticaria<br>[1.22] | Other MN<br>[8.47]  | Epilepsy<br>[1.58]  | ASD<br>[0.76]       |
| High SDI                                         | Neonatal<br>[0.83] | Congenital<br>[0.88] | URI<br>[1.14]        | Diarrhea<br>[0.73]   | ASD<br>[1.12]        | Hernia<br>[0.94]    | Urticaria<br>[0.74] | Iron<br>[0.41]      | Epilepsy<br>[0.74]  | Vit A<br>[0.26]     |
| Central Europe, Eastern Europe, and Central Asia | Neonatal<br>[1.42] | Congenital<br>[1.0]  | Diarrhea<br>[1.45]   | Iron<br>[2.35]       | Vit A<br>[1.1]       | Hernia<br>[1.47]    | Urticaria<br>[1.07] | PEM<br>[76.89]      | ASD<br>[0.79]       | URI<br>[0.52]       |
| Central Asia                                     | Neonatal<br>[1.07] | Iron<br>[1.67]       | Congenital<br>[0.98] | Vit A<br>[0.94]      | Diarrhea<br>[0.86]   | PEM<br>[18.69]      | Hernia<br>[2.66]    | Urticaria<br>[0.96] | Epilepsy<br>[1.05]  | ASD<br>[0.84]       |
| Armenia                                          | Iron<br>[3.88]     | Neonatal<br>[1.03]   | Congenital<br>[0.95] | Diarrhea<br>[0.92]   | Hernia<br>[2.32]     | Urticaria<br>[0.98] | Epilepsy<br>[1.03]  | ASD<br>[0.83]       | Oth NTD<br>[575.48] | URI<br>[0.51]       |
| Azerbaijan                                       | Neonatal<br>[1.15] | Iron<br>[2.56]       | Congenital<br>[0.97] | Diarrhea<br>[1.4]    | Vit A<br>[0.77]      | Hernia<br>[2.14]    | Urticaria<br>[0.98] | Epilepsy<br>[1.18]  | ASD<br>[0.83]       | Hemog<br>[2.61]     |
| Georgia                                          | Neonatal<br>[1.03] | Congenital<br>[0.96] | Diarrhea<br>[0.83]   | Iron<br>[0.72]       | Vit A<br>[0.54]      | Urticaria<br>[0.99] | Epilepsy<br>[1.11]  | ASD<br>[0.82]       | Hernia<br>[1.06]    | URI<br>[0.37]       |
| Kazakhstan                                       | Neonatal<br>[1.15] | Vit A<br>[1.74]      | Congenital<br>[0.98] | Iron<br>[1.32]       | Diarrhea<br>[0.76]   | Hernia<br>[1.72]    | Urticaria<br>[1.03] | Epilepsy<br>[1.35]  | ASD<br>[0.8]        | URI<br>[0.45]       |
| Kyrgyzstan                                       | Iron<br>[1.94]     | Neonatal<br>[1.01]   | Congenital<br>[1.01] | Vit A<br>[0.74]      | Hernia<br>[7.15]     | Diarrhea<br>[0.6]   | Urticaria<br>[0.92] | Epilepsy<br>[0.87]  | ASD<br>[0.9]        | Hemog<br>[1.6]      |
| Mongolia                                         | Neonatal<br>[1.09] | Vit A<br>[1.09]      | Congenital<br>[1.02] | Diarrhea<br>[1.21]   | Iron<br>[0.58]       | Hernia<br>[2.65]    | Urticaria<br>[0.95] | Epilepsy<br>[1.1]   | ASD<br>[0.85]       | URI<br>[0.37]       |
| Tajikistan                                       | PEM<br>[11.27]     | Neonatal<br>[0.96]   | Vit A<br>[0.68]      | Diarrhea<br>[1.15]   | Congenital<br>[1.06] | Iron<br>[0.62]      | Hernia<br>[4.96]    | Urticaria<br>[0.95] | ASD<br>[0.95]       | Epilepsy<br>[0.74]  |
| Turkmenistan                                     | Neonatal<br>[1.09] | Congenital<br>[0.98] | Iron<br>[1.3]        | Vit A<br>[0.7]       | Diarrhea<br>[0.73]   | Hernia<br>[2.16]    | Urticaria<br>[0.98] | Epilepsy<br>[1.08]  | ASD<br>[0.82]       | URI<br>[0.37]       |
| Uzbekistan                                       | Neonatal<br>[0.99] | Iron<br>[1.57]       | Congenital<br>[0.98] | Vit A<br>[0.6]       | Hernia<br>[3.2]      | Diarrhea<br>[0.48]  | Urticaria<br>[0.93] | Epilepsy<br>[0.96]  | ASD<br>[0.87]       | PEM<br>[2.29]       |
| Central Europe                                   | Neonatal<br>[1.46] | Congenital<br>[1.15] | Diarrhea<br>[1.72]   | Vit A<br>[3.35]      | Iron<br>[2.14]       | Hernia<br>[1.1]     | Urticaria<br>[1.18] | ASD<br>[0.79]       | URI<br>[0.58]       | Epilepsy<br>[1.23]  |
| Albania                                          | Neonatal<br>[1.26] | Vit A<br>[1.72]      | Congenital<br>[1.11] | Diarrhea<br>[0.99]   | Iron<br>[0.81]       | PEM<br>[18.58]      | Hernia<br>[2.46]    | Urticaria<br>[0.96] | Epilepsy<br>[1.16]  | ASD<br>[0.84]       |
| Bosnia                                           | Neonatal<br>[1.18] | Congenital<br>[1.07] | Vit A<br>[1.54]      | Diarrhea<br>[1.12]   | Iron<br>[0.88]       | Hernia<br>[2.16]    | Urticaria<br>[1.0]  | URI<br>[0.61]       | ASD<br>[0.82]       | Epilepsy<br>[0.88]  |
| Bulgaria                                         | Neonatal<br>[1.27] | Congenital<br>[1.1]  | Diarrhea<br>[1.63]   | Vit A<br>[2.56]      | Hernia<br>[1.47]     | Iron<br>[1.67]      | Urticaria<br>[1.12] | URI<br>[0.58]       | ASD<br>[0.79]       | Epilepsy<br>[1.11]  |
| Croatia                                          | Neonatal<br>[1.58] | Congenital<br>[1.09] | Diarrhea<br>[1.4]    | Hernia<br>[1.07]     | Urticaria<br>[1.21]  | Vit A<br>[1.32]     | URI<br>[0.58]       | ASD<br>[0.8]        | Epilepsy<br>[1.17]  | Blindness<br>[1.35] |
| Czech                                            | Neonatal<br>[1.07] | Congenital<br>[1.19] | Diarrhea<br>[1.82]   | Vit A<br>[2.59]      | Hernia<br>[1.11]     | Urticaria<br>[1.3]  | ASD<br>[0.81]       | URI<br>[0.58]       | Falls<br>[1.56]     | Epilepsy<br>[1.38]  |
| Hungary                                          | Neonatal<br>[1.38] | Congenital<br>[1.2]  | Diarrhea<br>[2.28]   | Vit A<br>[2.44]      | Hernia<br>[1.18]     | Urticaria<br>[1.18] | URI<br>[0.58]       | ASD<br>[0.79]       | Epilepsy<br>[1.2]   | Falls<br>[1.53]     |
| Macedonia                                        | Neonatal<br>[1.3]  | Vit A<br>[2.62]      | Congenital<br>[1.09] | Diarrhea<br>[1.48]   | Iron<br>[1.79]       | Hernia<br>[1.78]    | Urticaria<br>[1.05] | URI<br>[0.59]       | ASD<br>[0.8]        | Epilepsy<br>[0.89]  |
| Montenegro                                       | Neonatal<br>[1.31] | Congenital<br>[1.09] | Vit A<br>[2.27]      | Iron<br>[2.25]       | Diarrhea<br>[1.0]    | Hernia<br>[1.52]    | Urticaria<br>[1.11] | ASD<br>[0.79]       | URI<br>[0.58]       | Epilepsy<br>[1.08]  |
| Poland                                           | Neonatal<br>[1.73] | Congenital<br>[1.15] | Diarrhea<br>[1.74]   | Vit A<br>[3.56]      | Urticaria<br>[1.28]  | Hernia<br>[0.75]    | ASD<br>[0.81]       | URI<br>[0.58]       | Epilepsy<br>[1.45]  | Iron<br>[1.63]      |
| Romania                                          | Neonatal<br>[1.45] | Vit A<br>[3.64]      | Congenital<br>[1.15] | Diarrhea<br>[1.99]   | Iron<br>[3.66]       | Urticaria<br>[1.1]  | Hernia<br>[1.06]    | URI<br>[0.58]       | ASD<br>[0.78]       | Epilepsy<br>[1.17]  |
| Serbia                                           | Neonatal<br>[1.53] | Congenital<br>[1.19] | Vit A<br>[2.08]      | Diarrhea<br>[1.04]   | Hernia<br>[2.22]     | Iron<br>[1.07]      | Urticaria<br>[1.04] | URI<br>[0.59]       | ASD<br>[0.81]       | Falls<br>[1.95]     |
| Slovakia                                         | Neonatal<br>[1.16] | Congenital<br>[1.26] | Diarrhea<br>[1.97]   | Vit A<br>[3.78]      | Hernia<br>[1.12]     | Urticaria<br>[1.26] | ASD<br>[0.81]       | URI<br>[0.58]       | Epilepsy<br>[1.37]  | Falls<br>[1.42]     |
| Slovenia                                         | Neonatal<br>[1.25] | Congenital<br>[1.17] | Diarrhea<br>[1.87]   | Vit A<br>[3.38]      | Hernia<br>[1.0]      | Iron<br>[3.33]      | Urticaria<br>[1.34] | ASD<br>[0.82]       | URI<br>[0.58]       | Falls<br>[1.34]     |

**eFigure 9b. Leading ten causes of YLDs with the ratio of observed YLDs to YLDs expected on the basis of Socio-Demographic Index alone in 2017, <1 years, both sexes combined.**  
The top ten causes contributing to YLDs are listed globally, by socio-demographic quintile, and then by GBD superregion, region, country, and subnationally where modeled. For each cell, the ratio of observed YLDs to YLDs expected on the basis of socio-demographic index (SDI) alone are listed. Abbreviations: YLD=year of life lived with disability, GBD=Global Burden of Disease.

Values shown in brackets represent the ratio of observed YLDs to predicted YLDs on the basis of Socio-Demographic Index (SDI), rounded to two (2) digits. Color ranges (shown below) were calculated to place a roughly equal number of cells into each bin.

| COLOR KEY:                      |                    | [0.0-0.68]           | [0.68-0.82]          | [0.82-0.91]        | [0.91-1.01]         | [1.01-1.1]          | [1.1-1.21]          | [1.21-1.45]         | [1.45-2.25]          | 2.25+               |
|---------------------------------|--------------------|----------------------|----------------------|--------------------|---------------------|---------------------|---------------------|---------------------|----------------------|---------------------|
|                                 | 1                  | 2                    | 3                    | 4                  | 5                   | 6                   | 7                   | 8                   | 9                    | 10                  |
| <b>Eastern Europe</b>           | Neonatal<br>[1.65] | Diarrhea<br>[1.8]    | Congenital<br>[0.96] | Iron<br>[2.47]     | Hernia<br>[1.15]    | Urticaria<br>[1.12] | URI<br>[0.63]       | ASD<br>[0.78]       | Falls<br>[1.67]      | Epilepsy<br>[0.68]  |
| Belarus                         | Neonatal<br>[1.52] | Congenital<br>[0.95] | Diarrhea<br>[1.06]   | Iron<br>[1.36]     | Hernia<br>[1.18]    | Urticaria<br>[1.09] | URI<br>[0.62]       | ASD<br>[0.79]       | Falls<br>[1.83]      | Epilepsy<br>[0.69]  |
| Estonia                         | Neonatal<br>[1.79] | Diarrhea<br>[2.52]   | Congenital<br>[1.03] | Iron<br>[3.58]     | Urticaria<br>[1.35] | Hernia<br>[0.83]    | URI<br>[0.61]       | ASD<br>[0.81]       | Falls<br>[1.26]      | Other MN<br>[6.85]  |
| Latvia                          | Neonatal<br>[1.54] | Diarrhea<br>[1.95]   | Congenital<br>[0.92] | Iron<br>[2.92]     | Hernia<br>[0.96]    | Urticaria<br>[1.21] | URI<br>[0.61]       | ASD<br>[0.78]       | Falls<br>[1.51]      | Epilepsy<br>[0.74]  |
| Lithuania                       | Neonatal<br>[1.78] | Congenital<br>[1.12] | Diarrhea<br>[1.96]   | Iron<br>[3.58]     | Urticaria<br>[1.27] | URI<br>[0.61]       | Hernia<br>[0.69]    | ASD<br>[0.79]       | Falls<br>[1.38]      | Epilepsy<br>[0.86]  |
| Moldova                         | Neonatal<br>[1.53] | Iron<br>[1.68]       | Congenital<br>[0.97] | Diarrhea<br>[1.23] | Hernia<br>[1.97]    | Urticaria<br>[0.96] | URI<br>[0.65]       | ASD<br>[0.84]       | Falls<br>[3.69]      | Whooping<br>[1.79]  |
| Russian Federation              | Neonatal<br>[1.67] | Diarrhea<br>[2.13]   | Congenital<br>[0.95] | Iron<br>[2.55]     | Hernia<br>[1.1]     | Urticaria<br>[1.13] | URI<br>[0.63]       | ASD<br>[0.78]       | Falls<br>[1.64]      | PEM<br>[72.55]      |
| Ukraine                         | Neonatal<br>[1.56] | Congenital<br>[0.98] | Iron<br>[1.78]       | Diarrhea<br>[0.74] | Hernia<br>[1.52]    | Urticaria<br>[1.04] | URI<br>[0.64]       | ASD<br>[0.8]        | Whooping<br>[2.93]   | Falls<br>[2.0]      |
| <b>High-income</b>              | Neonatal<br>[0.98] | Congenital<br>[0.97] | Diarrhea<br>[1.12]   | URI<br>[1.14]      | ASD<br>[1.16]       | Hernia<br>[0.71]    | Iron<br>[2.2]       | Urticaria<br>[0.91] | Epilepsy<br>[1.02]   | Vit A<br>[0.93]     |
| <b>Australasia</b>              | Neonatal<br>[0.93] | Congenital<br>[0.81] | Hernia<br>[1.69]     | URI<br>[1.03]      | Diarrhea<br>[1.01]  | ASD<br>[1.05]       | Urticaria<br>[1.19] | Falls<br>[1.21]     | Other MN<br>[2.97]   | Med Treat<br>[7.76] |
| Australia                       | Neonatal<br>[0.91] | Congenital<br>[0.81] | Hernia<br>[1.71]     | URI<br>[1.03]      | Diarrhea<br>[1.07]  | ASD<br>[1.05]       | Urticaria<br>[1.21] | Falls<br>[1.21]     | Other MN<br>[2.94]   | Epilepsy<br>[0.59]  |
| New Zealand                     | Neonatal<br>[1.04] | Congenital<br>[0.81] | Hernia<br>[1.63]     | URI<br>[1.04]      | Diarrhea<br>[0.73]  | ASD<br>[1.01]       | Urticaria<br>[1.09] | Falls<br>[1.22]     | Med Treat<br>[10.67] | Epilepsy<br>[0.53]  |
| <b>High-income Asia Pacific</b> | Neonatal<br>[1.19] | Congenital<br>[1.0]  | URI<br>[1.06]        | ASD<br>[1.3]       | Iron<br>[3.67]      | Vit A<br>[1.88]     | Urticaria<br>[1.09] | Diarrhea<br>[0.56]  | Hernia<br>[0.57]     | Falls<br>[0.91]     |
| Brunei                          | Neonatal<br>[1.23] | Congenital<br>[0.85] | Iron<br>[5.55]       | URI<br>[1.03]      | ASD<br>[1.19]       | Diarrhea<br>[0.57]  | Urticaria<br>[1.02] | Hernia<br>[0.55]    | Falls<br>[1.22]      | Epilepsy<br>[0.84]  |
| Japan                           | Neonatal<br>[1.15] | Congenital<br>[1.08] | URI<br>[1.06]        | ASD<br>[1.38]      | Vit A<br>[1.94]     | Urticaria<br>[1.08] | Hernia<br>[0.6]     | PEM<br>[1095.99]    | Diarrhea<br>[0.5]    | Iron<br>[1.92]      |
| Aichi                           | Neonatal<br>[1.22] | Congenital<br>[1.04] | ASD<br>[2.04]        | URI<br>[1.07]      | Urticaria<br>[1.12] | Vit A<br>[1.82]     | Diarrhea<br>[0.56]  | PEM<br>[1561.09]    | Hernia<br>[0.57]     | Endocrine<br>[2.75] |
| Akita                           | Neonatal<br>[1.2]  | Congenital<br>[1.07] | URI<br>[1.05]        | ASD<br>[1.31]      | Vit A<br>[1.42]     | PEM<br>[510.96]     | Urticaria<br>[0.96] | Diarrhea<br>[0.48]  | Hernia<br>[0.67]     | Endocrine<br>[2.5]  |
| Aomori                          | Neonatal<br>[1.11] | Congenital<br>[0.99] | URI<br>[1.05]        | ASD<br>[1.31]      | Vit A<br>[1.56]     | Urticaria<br>[0.95] | Diarrhea<br>[0.47]  | Hernia<br>[0.68]    | PEM<br>[325.05]      | Endocrine<br>[2.53] |
| Chiba                           | Neonatal<br>[1.14] | Congenital<br>[1.07] | URI<br>[1.06]        | ASD<br>[1.36]      | Vit A<br>[1.71]     | Urticaria<br>[1.06] | Hernia<br>[0.62]    | Iron<br>[2.15]      | Diarrhea<br>[0.48]   | Endocrine<br>[2.73] |
| Ehime                           | Neonatal<br>[0.9]  | Congenital<br>[0.99] | URI<br>[1.06]        | ASD<br>[1.34]      | Vit A<br>[1.36]     | Urticaria<br>[0.99] | PEM<br>[560.25]     | Hernia<br>[0.65]    | Diarrhea<br>[0.45]   | Endocrine<br>[2.34] |
| Fukui                           | Neonatal<br>[1.12] | Congenital<br>[1.02] | URI<br>[1.05]        | ASD<br>[1.35]      | Vit A<br>[2.27]     | Iron<br>[2.99]      | PEM<br>[916.53]     | Urticaria<br>[1.03] | Diarrhea<br>[0.54]   | Hernia<br>[0.62]    |
| Fukuoka                         | Neonatal<br>[1.12] | Congenital<br>[1.01] | URI<br>[1.06]        | ASD<br>[0.99]      | PEM<br>[1118.32]    | Vit A<br>[1.75]     | Urticaria<br>[1.04] | Hernia<br>[0.62]    | Diarrhea<br>[0.52]   | Endocrine<br>[2.66] |
| Fukushima                       | Neonatal<br>[1.0]  | Congenital<br>[1.21] | URI<br>[1.05]        | ASD<br>[1.32]      | Iron<br>[2.49]      | Urticaria<br>[0.96] | Hernia<br>[0.66]    | Diarrhea<br>[0.46]  | Vit A<br>[1.04]      | PEM<br>[356.49]     |
| Gifu                            | Neonatal<br>[1.16] | Congenital<br>[0.92] | URI<br>[1.06]        | ASD<br>[1.34]      | Urticaria<br>[1.02] | PEM<br>[820.09]     | Diarrhea<br>[0.53]  | Hernia<br>[0.63]    | Vit A<br>[1.3]       | Endocrine<br>[2.75] |
| Gunma                           | Neonatal<br>[1.08] | Congenital<br>[1.06] | URI<br>[1.06]        | ASD<br>[1.34]      | Vit A<br>[2.31]     | Iron<br>[2.31]      | Urticaria<br>[1.02] | Hernia<br>[0.62]    | Diarrhea<br>[0.5]    | Endocrine<br>[3.0]  |
| Hiroshima                       | Neonatal<br>[1.21] | Congenital<br>[1.0]  | URI<br>[1.06]        | ASD<br>[1.36]      | Vit A<br>[2.13]     | Urticaria<br>[1.08] | Hernia<br>[0.6]     | Diarrhea<br>[0.51]  | Iron<br>[2.02]       | PEM<br>[963.23]     |
| Hokkaido                        | Neonatal<br>[1.07] | Congenital<br>[1.02] | Iron<br>[3.54]       | URI<br>[1.05]      | ASD<br>[1.32]       | Urticaria<br>[0.99] | Vit A<br>[1.33]     | Hernia<br>[0.65]    | Diarrhea<br>[0.48]   | PEM<br>[451.28]     |
| Hyogo                           | Neonatal<br>[1.16] | Congenital<br>[0.88] | URI<br>[1.06]        | ASD<br>[1.35]      | PEM<br>[1310.21]    | Urticaria<br>[1.06] | Vit A<br>[1.56]     | Hernia<br>[0.61]    | Diarrhea<br>[0.5]    | Endocrine<br>[2.49] |
| Ibaraki                         | Neonatal<br>[1.19] | Congenital<br>[1.18] | URI<br>[1.06]        | ASD<br>[1.08]      | Vit A<br>[1.57]     | Urticaria<br>[1.02] | Iron<br>[2.21]      | Hernia<br>[0.62]    | Diarrhea<br>[0.43]   | Endocrine<br>[2.7]  |
| Ishikawa                        | Neonatal<br>[1.1]  | Congenital<br>[0.99] | URI<br>[1.06]        | ASD<br>[1.34]      | Vit A<br>[2.1]      | Urticaria<br>[1.04] | Diarrhea<br>[0.55]  | Hernia<br>[0.62]    | PEM<br>[830.61]      | Endocrine<br>[2.49] |
| Iwate                           | Neonatal<br>[1.15] | Congenital<br>[1.19] | URI<br>[1.05]        | ASD<br>[1.31]      | Vit A<br>[1.76]     | PEM<br>[444.01]     | Iron<br>[1.81]      | Urticaria<br>[0.95] | Diarrhea<br>[0.47]   | Hernia<br>[0.68]    |

**eFigure 9b. Leading ten causes of YLDs with the ratio of observed YLDs to YLDs expected on the basis of Socio-Demographic Index alone in 2017, <1 years, both sexes combined.**  
The top ten causes contributing to YLDs are listed globally, by socio-demographic quintile, and then by GBD superregion, region, country, and subnationally where modeled. For each cell, the ratio of observed YLDs to YLDs expected on the basis of socio-demographic index (SDI) alone are listed. Abbreviations: YLD=year of life lived with disability, GBD=Global Burden of Disease.

Values shown in brackets represent the ratio of observed YLDs to predicted YLDs on the basis of Socio-Demographic Index (SDI), rounded to two (2) digits. Color ranges (shown below) were calculated to place a roughly equal number of cells into each bin.

| COLOR KEY: |                    | [0.0-0.68]           | [0.68-0.82]     | [0.82-0.91]     | [0.91-1.01]         | [1.01-1.1]          | [1.1-1.21]          | [1.21-1.45]         | [1.45-2.25]         | 2.25+               |
|------------|--------------------|----------------------|-----------------|-----------------|---------------------|---------------------|---------------------|---------------------|---------------------|---------------------|
|            | 1                  | 2                    | 3               | 4               | 5                   | 6                   | 7                   | 8                   | 9                   | 10                  |
| Kagawa     | Neonatal<br>[1.07] | Congenital<br>[0.99] | URI<br>[1.06]   | ASD<br>[1.34]   | Vit A<br>[2.18]     | PEM<br>[909.59]     | Urticaria<br>[1.03] | Diarrhea<br>[0.55]  | Hernia<br>[0.62]    | Endocrine<br>[2.52] |
| Kagoshima  | Neonatal<br>[0.93] | Congenital<br>[1.17] | URI<br>[1.05]   | ASD<br>[1.32]   | Vit A<br>[1.68]     | Urticaria<br>[0.97] | Hernia<br>[0.68]    | PEM<br>[406.36]     | Diarrhea<br>[0.46]  | Iron<br>[1.5]       |
| Kanagawa   | Neonatal<br>[1.24] | Congenital<br>[1.14] | ASD<br>[1.65]   | URI<br>[1.07]   | Urticaria<br>[1.12] | PEM<br>[1641.01]    | Hernia<br>[0.59]    | Vit A<br>[1.68]     | Diarrhea<br>[0.47]  | Endocrine<br>[2.63] |
| Kochi      | Neonatal<br>[0.99] | Congenital<br>[0.96] | URI<br>[1.05]   | ASD<br>[1.32]   | Vit A<br>[1.32]     | Iron<br>[1.7]       | Urticaria<br>[0.95] | Hernia<br>[0.7]     | Diarrhea<br>[0.46]  | PEM<br>[329.34]     |
| Kumamoto   | Neonatal<br>[0.98] | Congenital<br>[0.96] | URI<br>[1.05]   | ASD<br>[1.32]   | Vit A<br>[1.79]     | Iron<br>[2.05]      | Urticaria<br>[0.96] | Diarrhea<br>[0.49]  | PEM<br>[419.28]     | Hernia<br>[0.67]    |
| Kyoto      | Neonatal<br>[1.24] | Congenital<br>[1.27] | URI<br>[1.07]   | ASD<br>[1.38]   | PEM<br>[1878.54]    | Urticaria<br>[1.12] | Iron<br>[2.8]       | Hernia<br>[0.58]    | Diarrhea<br>[0.55]  | Vit A<br>[1.62]     |
| Mie        | Neonatal<br>[1.18] | Congenital<br>[1.02] | URI<br>[1.06]   | ASD<br>[1.34]   | Vit A<br>[1.6]      | Urticaria<br>[1.04] | PEM<br>[960.41]     | Diarrhea<br>[0.56]  | Hernia<br>[0.6]     | Iron<br>[2.09]      |
| Miyagi     | Neonatal<br>[1.07] | Congenital<br>[1.15] | URI<br>[1.06]   | ASD<br>[1.34]   | Vit A<br>[2.01]     | Urticaria<br>[1.02] | Hernia<br>[0.63]    | Iron<br>[1.93]      | Diarrhea<br>[0.49]  | PEM<br>[598.38]     |
| Miyazaki   | Neonatal<br>[0.97] | Congenital<br>[1.01] | URI<br>[1.05]   | ASD<br>[1.32]   | Iron<br>[1.73]      | Urticaria<br>[0.95] | PEM<br>[365.64]     | Hernia<br>[0.69]    | Vit A<br>[0.91]     | Diarrhea<br>[0.4]   |
| Nagano     | Neonatal<br>[1.19] | Congenital<br>[0.97] | URI<br>[1.06]   | ASD<br>[1.34]   | Vit A<br>[2.14]     | Iron<br>[2.8]       | PEM<br>[917.24]     | Urticaria<br>[1.02] | Hernia<br>[0.62]    | Diarrhea<br>[0.51]  |
| Nagasaki   | Neonatal<br>[0.97] | Congenital<br>[1.22] | Vit A<br>[2.26] | URI<br>[1.05]   | ASD<br>[1.31]       | Urticaria<br>[0.95] | Hernia<br>[0.69]    | Iron<br>[1.44]      | Diarrhea<br>[0.44]  | PEM<br>[285.74]     |
| Nara       | Neonatal<br>[1.0]  | Congenital<br>[1.29] | URI<br>[1.06]   | Vit A<br>[2.68] | ASD<br>[1.34]       | PEM<br>[881.24]     | Urticaria<br>[1.02] | Hernia<br>[0.65]    | Diarrhea<br>[0.49]  | Endocrine<br>[2.5]  |
| Niigata    | Neonatal<br>[1.13] | Congenital<br>[1.05] | URI<br>[1.05]   | ASD<br>[1.33]   | PEM<br>[819.75]     | Vit A<br>[1.63]     | Urticaria<br>[1.01] | Hernia<br>[0.63]    | Diarrhea<br>[0.46]  | Iron<br>[1.66]      |
| Oita       | Neonatal<br>[1.19] | Congenital<br>[0.92] | URI<br>[1.06]   | Vit A<br>[2.49] | ASD<br>[1.34]       | PEM<br>[854.75]     | Urticaria<br>[1.01] | Diarrhea<br>[0.54]  | Hernia<br>[0.63]    | Iron<br>[1.77]      |
| Okayama    | Neonatal<br>[1.22] | Congenital<br>[1.04] | URI<br>[1.06]   | ASD<br>[1.34]   | Vit A<br>[1.75]     | Urticaria<br>[1.04] | Hernia<br>[0.61]    | Diarrhea<br>[0.49]  | Endocrine<br>[2.47] | Falls<br>[0.86]     |
| Okinawa    | Neonatal<br>[1.01] | Congenital<br>[0.93] | Vit A<br>[2.03] | URI<br>[1.05]   | ASD<br>[1.31]       | PEM<br>[399.73]     | Urticaria<br>[0.94] | Hernia<br>[0.71]    | Diarrhea<br>[0.43]  | Iron<br>[1.06]      |
| Osaka      | Neonatal<br>[1.1]  | Congenital<br>[1.09] | URI<br>[1.06]   | ASD<br>[1.01]   | Vit A<br>[2.08]     | Urticaria<br>[1.09] | Hernia<br>[0.58]    | PEM<br>[1319.04]    | Diarrhea<br>[0.49]  | Iron<br>[2.13]      |
| Saga       | Neonatal<br>[1.03] | Congenital<br>[0.94] | Vit A<br>[2.52] | URI<br>[1.05]   | ASD<br>[1.31]       | Urticaria<br>[0.98] | Hernia<br>[0.66]    | Iron<br>[1.7]       | Diarrhea<br>[0.46]  | PEM<br>[413.13]     |
| Saitama    | Neonatal<br>[1.1]  | Congenital<br>[1.01] | URI<br>[1.06]   | ASD<br>[1.35]   | Urticaria<br>[1.03] | Vit A<br>[1.5]      | Hernia<br>[0.65]    | Diarrhea<br>[0.46]  | PEM<br>[596.33]     | Iron<br>[1.43]      |
| Shiga      | Neonatal<br>[1.09] | Congenital<br>[1.1]  | URI<br>[1.07]   | ASD<br>[1.38]   | Vit A<br>[2.6]      | Urticaria<br>[1.09] | Iron<br>[2.67]      | Hernia<br>[0.58]    | Diarrhea<br>[0.51]  | PEM<br>[1003.92]    |
| Shimane    | Neonatal<br>[1.0]  | Congenital<br>[1.02] | URI<br>[1.05]   | Iron<br>[3.03]  | ASD<br>[1.32]       | Urticaria<br>[0.96] | PEM<br>[438.88]     | Hernia<br>[0.67]    | Vit A<br>[1.1]      | Diarrhea<br>[0.45]  |
| Shizuoka   | Neonatal<br>[1.27] | Congenital<br>[0.97] | Iron<br>[5.34]  | URI<br>[1.06]   | ASD<br>[1.36]       | Vit A<br>[1.75]     | Urticaria<br>[1.06] | PEM<br>[1039.59]    | Hernia<br>[0.6]     | Diarrhea<br>[0.49]  |
| Tochigi    | Neonatal<br>[1.21] | Congenital<br>[1.31] | Iron<br>[4.45]  | URI<br>[1.06]   | ASD<br>[1.34]       | Urticaria<br>[1.04] | Hernia<br>[0.61]    | Diarrhea<br>[0.46]  | Endocrine<br>[2.84] | Vit A<br>[1.0]      |
| Tokushima  | Neonatal<br>[1.13] | Congenital<br>[0.99] | Vit A<br>[2.74] | URI<br>[1.05]   | ASD<br>[1.33]       | PEM<br>[904.8]      | Urticaria<br>[1.01] | Iron<br>[2.09]      | Diarrhea<br>[0.5]   | Hernia<br>[0.63]    |
| Tokyo      | Neonatal<br>[1.32] | Congenital<br>[1.31] | URI<br>[1.11]   | ASD<br>[1.48]   | Urticaria<br>[1.34] | Hernia<br>[0.49]    | Vit A<br>[2.71]     | Diarrhea<br>[0.59]  | PEM<br>[4861.74]    | Other MN<br>[4.25]  |
| Tottori    | Neonatal<br>[1.13] | Congenital<br>[1.09] | URI<br>[1.05]   | ASD<br>[1.33]   | Vit A<br>[1.67]     | Iron<br>[2.21]      | PEM<br>[576.67]     | Urticaria<br>[0.98] | Hernia<br>[0.67]    | Diarrhea<br>[0.47]  |
| Toyama     | Neonatal<br>[1.1]  | Congenital<br>[1.06] | URI<br>[1.06]   | ASD<br>[1.36]   | Vit A<br>[1.74]     | Urticaria<br>[1.06] | PEM<br>[1036.11]    | Hernia<br>[0.6]     | Diarrhea<br>[0.46]  | Other MN<br>[5.18]  |
| Wakayama   | Neonatal<br>[1.16] | Congenital<br>[0.89] | Vit A<br>[2.83] | URI<br>[1.05]   | ASD<br>[1.33]       | PEM<br>[659.98]     | Urticaria<br>[0.99] | Hernia<br>[0.65]    | Iron<br>[1.71]      | Diarrhea<br>[0.46]  |
| Yamagata   | Neonatal<br>[0.92] | Congenital<br>[0.93] | Vit A<br>[2.82] | URI<br>[1.05]   | ASD<br>[1.31]       | Urticaria<br>[0.97] | PEM<br>[429.44]     | Diarrhea<br>[0.47]  | Hernia<br>[0.67]    | Endocrine<br>[2.39] |
| Yamaguchi  | Neonatal<br>[0.98] | Congenital<br>[0.93] | URI<br>[1.05]   | Iron<br>[3.86]  | ASD<br>[1.34]       | Vit A<br>[1.83]     | PEM<br>[867.18]     | Urticaria<br>[1.02] | Hernia<br>[0.62]    | Diarrhea<br>[0.49]  |
| Yamanashi  | Neonatal<br>[1.28] | Congenital<br>[1.21] | URI<br>[1.06]   | ASD<br>[1.34]   | Vit A<br>[2.24]     | Urticaria<br>[1.04] | Hernia<br>[0.61]    | Diarrhea<br>[0.48]  | PEM<br>[678.32]     | Falls<br>[0.87]     |

**eFigure 9b. Leading ten causes of YLDs with the ratio of observed YLDs to YLDs expected on the basis of Socio-Demographic Index alone in 2017, <1 years, both sexes combined.**  
The top ten causes contributing to YLDs are listed globally, by socio-demographic quintile, and then by GBD superregion, region, country, and subnationally where modeled. For each cell, the ratio of observed YLDs to YLDs expected on the basis of socio-demographic index (SDI) alone are listed. Abbreviations: YLD=year of life lived with disability, GBD=Global Burden of Disease.

Values shown in brackets represent the ratio of observed YLDs to predicted YLDs on the basis of Socio-Demographic Index (SDI), rounded to two (2) digits. Color ranges (shown below) were calculated to place a roughly equal number of cells into each bin.

| COLOR KEY:                |                    | [0.0-0.68]           | [0.68-0.82]         | [0.82-0.91]         | [0.91-1.01]         | [1.01-1.1]          | [1.1-1.21]          | [1.21-1.45]         | [1.45-2.25]         | 2.25+               |
|---------------------------|--------------------|----------------------|---------------------|---------------------|---------------------|---------------------|---------------------|---------------------|---------------------|---------------------|
|                           | 1                  | 2                    | 3                   | 4                   | 5                   | 6                   | 7                   | 8                   | 9                   | 10                  |
| S Korea                   | Neonatal<br>[1.23] | Congenital<br>[0.84] | Iron<br>[6.39]      | URI<br>[1.04]       | ASD<br>[1.12]       | Diarrhea<br>[0.65]  | Urticaria<br>[1.08] | Vit A<br>[1.64]     | Hernia<br>[0.54]    | Falls<br>[1.07]     |
| Singapore                 | Neonatal<br>[1.21] | Iron<br>[9.47]       | Congenital<br>[0.7] | URI<br>[1.03]       | ASD<br>[1.21]       | Urticaria<br>[1.07] | Diarrhea<br>[0.56]  | Hernia<br>[0.53]    | Falls<br>[1.06]     | Vit A<br>[1.1]      |
| High-income North America | Neonatal<br>[1.0]  | Congenital<br>[1.0]  | URI<br>[1.22]       | ASD<br>[1.28]       | Diarrhea<br>[0.69]  | Urticaria<br>[1.12] | Iron<br>[1.98]      | Epilepsy<br>[1.17]  | Oth Neuro<br>[1.66] | ID<br>[2.18]        |
| Canada                    | Neonatal<br>[0.7]  | Congenital<br>[0.93] | URI<br>[1.17]       | ASD<br>[1.58]       | Diarrhea<br>[0.84]  | Urticaria<br>[1.16] | Vit A<br>[0.94]     | Epilepsy<br>[0.79]  | Other MN<br>[3.0]   | Whooping<br>[1.89]  |
| Greenland                 | Neonatal<br>[0.67] | Congenital<br>[0.88] | URI<br>[1.19]       | ASD<br>[1.27]       | Diarrhea<br>[0.56]  | Iron<br>[0.69]      | Urticaria<br>[0.86] | Vit A<br>[0.37]     | Epilepsy<br>[0.89]  | Falls<br>[0.96]     |
| USA                       | Neonatal<br>[1.02] | Congenital<br>[1.0]  | URI<br>[1.22]       | ASD<br>[1.25]       | Diarrhea<br>[0.66]  | Urticaria<br>[1.11] | Iron<br>[1.98]      | Epilepsy<br>[1.19]  | Oth Neuro<br>[1.68] | ID<br>[2.14]        |
| Alabama                   | Neonatal<br>[0.96] | Congenital<br>[0.78] | URI<br>[1.21]       | Diarrhea<br>[0.69]  | ASD<br>[0.78]       | Urticaria<br>[0.9]  | Iron<br>[1.47]      | Epilepsy<br>[1.08]  | Vit A<br>[0.51]     | ID<br>[2.63]        |
| Alaska                    | Neonatal<br>[0.9]  | Congenital<br>[1.13] | URI<br>[1.22]       | ASD<br>[1.17]       | Diarrhea<br>[0.65]  | Urticaria<br>[0.96] | Epilepsy<br>[0.83]  | Iron<br>[1.13]      | Falls<br>[0.49]     | Whooping<br>[1.71]  |
| Arizona                   | Neonatal<br>[0.95] | Congenital<br>[0.96] | URI<br>[1.21]       | ASD<br>[1.26]       | Diarrhea<br>[0.61]  | Urticaria<br>[1.05] | Iron<br>[2.1]       | Epilepsy<br>[0.99]  | Vit A<br>[0.43]     | Whooping<br>[1.6]   |
| Arkansas                  | Neonatal<br>[0.84] | Congenital<br>[0.8]  | URI<br>[1.2]        | ASD<br>[1.22]       | Diarrhea<br>[0.56]  | Urticaria<br>[0.83] | Epilepsy<br>[0.96]  | Iron<br>[0.89]      | ID<br>[2.01]        | Oth Neuro<br>[1.37] |
| California                | Neonatal<br>[0.9]  | Congenital<br>[0.93] | URI<br>[1.22]       | ASD<br>[1.45]       | Urticaria<br>[1.11] | Diarrhea<br>[0.58]  | Epilepsy<br>[1.22]  | Iron<br>[1.9]       | Oth Neuro<br>[1.72] | Med Treat<br>[6.44] |
| Colorado                  | Neonatal<br>[1.02] | Congenital<br>[1.04] | URI<br>[1.23]       | ASD<br>[1.11]       | Diarrhea<br>[0.66]  | Urticaria<br>[1.13] | Epilepsy<br>[1.13]  | Iron<br>[1.91]      | Falls<br>[0.45]     | Oth Neuro<br>[1.59] |
| Connecticut               | Neonatal<br>[1.27] | Congenital<br>[1.05] | URI<br>[1.25]       | ASD<br>[1.24]       | Diarrhea<br>[0.87]  | Urticaria<br>[1.41] | Epilepsy<br>[1.43]  | Oth Neuro<br>[2.02] | Iron<br>[1.28]      | Oth Skin<br>[1.24]  |
| Delaware                  | Neonatal<br>[1.07] | Congenital<br>[1.06] | URI<br>[1.22]       | ASD<br>[1.19]       | Diarrhea<br>[0.85]  | Urticaria<br>[1.19] | Epilepsy<br>[1.54]  | Iron<br>[1.51]      | Oth Neuro<br>[2.17] | ID<br>[2.3]         |
| DC                        | Neonatal<br>[1.03] | Congenital<br>[1.11] | URI<br>[1.23]       | Diarrhea<br>[0.94]  | ASD<br>[1.19]       | Urticaria<br>[1.18] | Epilepsy<br>[0.99]  | Iron<br>[1.28]      | Oth Skin<br>[1.27]  | Falls<br>[0.37]     |
| Florida                   | Neonatal<br>[1.11] | Congenital<br>[1.0]  | URI<br>[1.22]       | Diarrhea<br>[0.7]   | Iron<br>[2.91]      | Urticaria<br>[1.16] | ASD<br>[0.86]       | Epilepsy<br>[1.19]  | Oth Neuro<br>[1.69] | ID<br>[2.43]        |
| Georgia                   | Neonatal<br>[0.95] | Congenital<br>[0.88] | URI<br>[1.21]       | ASD<br>[1.17]       | Diarrhea<br>[0.63]  | Urticaria<br>[1.04] | Epilepsy<br>[1.24]  | Iron<br>[0.92]      | Oth Neuro<br>[1.76] | Vit A<br>[0.49]     |
| Hawaii                    | Neonatal<br>[0.91] | Congenital<br>[0.96] | URI<br>[1.22]       | ASD<br>[1.18]       | Urticaria<br>[1.32] | Diarrhea<br>[0.58]  | Iron<br>[2.48]      | Epilepsy<br>[1.0]   | Other MN<br>[2.49]  | ID<br>[2.15]        |
| Idaho                     | Neonatal<br>[0.79] | Congenital<br>[0.83] | URI<br>[1.21]       | ASD<br>[1.14]       | Diarrhea<br>[0.55]  | Urticaria<br>[0.81] | Iron<br>[1.56]      | Epilepsy<br>[0.87]  | ID<br>[2.32]        | Whooping<br>[1.52]  |
| Illinois                  | Neonatal<br>[1.18] | Congenital<br>[1.1]  | URI<br>[1.22]       | ASD<br>[1.19]       | Diarrhea<br>[0.73]  | Urticaria<br>[1.2]  | Epilepsy<br>[1.24]  | Iron<br>[1.9]       | Oth Neuro<br>[1.76] | ID<br>[2.41]        |
| Indiana                   | Neonatal<br>[0.97] | Congenital<br>[1.07] | URI<br>[1.21]       | ASD<br>[1.15]       | Diarrhea<br>[0.7]   | Urticaria<br>[0.96] | Epilepsy<br>[1.22]  | Iron<br>[1.28]      | Oth Neuro<br>[1.73] | Med Treat<br>[6.73] |
| Iowa                      | Neonatal<br>[0.91] | Congenital<br>[0.96] | URI<br>[1.22]       | ASD<br>[1.18]       | Urticaria<br>[1.11] | Diarrhea<br>[0.61]  | Iron<br>[1.44]      | Epilepsy<br>[0.79]  | ID<br>[2.32]        | Whooping<br>[1.6]   |
| Kansas                    | Neonatal<br>[1.02] | Congenital<br>[0.91] | URI<br>[1.22]       | ASD<br>[1.17]       | Diarrhea<br>[0.65]  | Urticaria<br>[1.07] | Iron<br>[1.84]      | Epilepsy<br>[1.09]  | ID<br>[2.26]        | Oth Neuro<br>[1.55] |
| Kentucky                  | Neonatal<br>[0.97] | Congenital<br>[0.92] | URI<br>[1.21]       | ASD<br>[1.13]       | Diarrhea<br>[0.57]  | Urticaria<br>[0.98] | Epilepsy<br>[1.21]  | Iron<br>[1.17]      | Oth Neuro<br>[1.72] | Vit A<br>[0.41]     |
| Louisiana                 | Neonatal<br>[0.91] | Congenital<br>[0.93] | URI<br>[1.21]       | Urticaria<br>[1.07] | Diarrhea<br>[0.57]  | ASD<br>[0.79]       | Epilepsy<br>[1.19]  | Iron<br>[1.11]      | Oth Neuro<br>[1.69] | ID<br>[2.15]        |
| Maine                     | Neonatal<br>[1.04] | Congenital<br>[1.01] | URI<br>[1.22]       | Diarrhea<br>[0.89]  | ASD<br>[1.18]       | Urticaria<br>[1.09] | Epilepsy<br>[1.13]  | Iron<br>[1.29]      | ID<br>[2.48]        | Oth Neuro<br>[1.61] |
| Maryland                  | Neonatal<br>[1.2]  | Congenital<br>[1.07] | URI<br>[1.23]       | ASD<br>[1.33]       | Diarrhea<br>[0.84]  | Urticaria<br>[1.26] | Epilepsy<br>[1.29]  | Iron<br>[1.92]      | Oth Neuro<br>[1.82] | Falls<br>[0.4]      |
| Massachusetts             | Neonatal<br>[1.26] | Congenital<br>[1.17] | URI<br>[1.26]       | ASD<br>[1.66]       | Diarrhea<br>[0.89]  | Urticaria<br>[1.48] | Epilepsy<br>[1.51]  | Med Treat<br>[7.98] | Oth Neuro<br>[2.13] | Oth Skin<br>[1.42]  |
| Michigan                  | Neonatal<br>[1.02] | Congenital<br>[1.14] | URI<br>[1.22]       | ASD<br>[1.17]       | Diarrhea<br>[0.7]   | Urticaria<br>[1.16] | Iron<br>[2.17]      | Epilepsy<br>[1.24]  | Whooping<br>[2.11]  | Med Treat<br>[7.71] |
| Minnesota                 | Neonatal<br>[1.07] | Congenital<br>[1.13] | URI<br>[1.24]       | ASD<br>[1.42]       | Urticaria<br>[1.28] | Diarrhea<br>[0.7]   | Iron<br>[3.24]      | Epilepsy<br>[1.08]  | Med Treat<br>[7.28] | Other MN<br>[2.21]  |
| Mississippi               | Neonatal<br>[0.87] | Congenital<br>[0.75] | URI<br>[1.2]        | ASD<br>[1.12]       | Diarrhea<br>[0.6]   | Urticaria<br>[0.85] | Epilepsy<br>[0.91]  | ID<br>[2.29]        | Oth Neuro<br>[1.29] | Iron<br>[0.43]      |

**eFigure 9b. Leading ten causes of YLDs with the ratio of observed YLDs to YLDs expected on the basis of Socio-Demographic Index alone in 2017, <1 years, both sexes combined.**  
The top ten causes contributing to YLDs are listed globally, by socio-demographic quintile, and then by GBD superregion, region, country, and subnationally where modeled. For each cell, the ratio of observed YLDs to YLDs expected on the basis of socio-demographic index (SDI) alone are listed. Abbreviations: YLD=year of life lived with disability, GBD=Global Burden of Disease.

Values shown in brackets represent the ratio of observed YLDs to predicted YLDs on the basis of Socio-Demographic Index (SDI), rounded to two (2) digits. Color ranges (shown below) were calculated to place a roughly equal number of cells into each bin.

| COLOR KEY:             |                    | [0.0-0.68]           | [0.68-0.82]          | [0.82-0.91]          | [0.91-1.01]         | [1.01-1.1]          | [1.1-1.21]          | [1.21-1.45]         | [1.45-2.25]         | 2.25+               |
|------------------------|--------------------|----------------------|----------------------|----------------------|---------------------|---------------------|---------------------|---------------------|---------------------|---------------------|
|                        | 1                  | 2                    | 3                    | 4                    | 5                   | 6                   | 7                   | 8                   | 9                   | 10                  |
| Missouri               | Neonatal<br>[0.99] | Congenital<br>[1.02] | URI<br>[1.21]        | ASD<br>[1.22]        | Diarrhea<br>[0.68]  | Urticaria<br>[0.97] | Iron<br>[1.95]      | Epilepsy<br>[1.08]  | Vit A<br>[0.54]     | Oth Neuro<br>[1.53] |
| Montana                | Neonatal<br>[1.0]  | Congenital<br>[0.86] | URI<br>[1.22]        | ASD<br>[1.17]        | Diarrhea<br>[0.61]  | Urticaria<br>[0.87] | Iron<br>[2.04]      | Epilepsy<br>[1.15]  | Vit A<br>[0.66]     | ID<br>[2.5]         |
| Nebraska               | Neonatal<br>[0.93] | Congenital<br>[1.0]  | URI<br>[1.22]        | ASD<br>[1.19]        | Urticaria<br>[1.18] | Diarrhea<br>[0.61]  | Iron<br>[1.94]      | Epilepsy<br>[0.9]   | ID<br>[2.33]        | Oth Skin<br>[1.04]  |
| Nevada                 | Neonatal<br>[0.95] | Congenital<br>[0.8]  | URI<br>[1.21]        | ASD<br>[1.15]        | Diarrhea<br>[0.59]  | Urticaria<br>[1.0]  | Epilepsy<br>[1.12]  | Iron<br>[1.46]      | ID<br>[2.4]         | Oth Neuro<br>[1.59] |
| New Hampshire          | Neonatal<br>[1.04] | Congenital<br>[1.03] | URI<br>[1.25]        | ASD<br>[1.24]        | Diarrhea<br>[0.96]  | Urticaria<br>[1.19] | Epilepsy<br>[1.22]  | Iron<br>[2.52]      | ID<br>[2.62]        | Oth Neuro<br>[1.73] |
| New Jersey             | Neonatal<br>[1.17] | Congenital<br>[1.27] | URI<br>[1.24]        | ASD<br>[1.79]        | Diarrhea<br>[0.8]   | Urticaria<br>[1.33] | Epilepsy<br>[1.54]  | Iron<br>[1.75]      | Oth Neuro<br>[2.17] | Oth Skin<br>[1.29]  |
| New Mexico             | Neonatal<br>[1.04] | Congenital<br>[0.97] | URI<br>[1.21]        | ASD<br>[1.13]        | Diarrhea<br>[0.6]   | Urticaria<br>[0.93] | Iron<br>[1.46]      | Epilepsy<br>[1.19]  | Oth Neuro<br>[1.69] | ID<br>[2.16]        |
| New York               | Neonatal<br>[1.21] | Congenital<br>[1.32] | URI<br>[1.24]        | Urticaria<br>[1.28]  | Diarrhea<br>[0.72]  | ASD<br>[0.87]       | Epilepsy<br>[1.5]   | Oth Neuro<br>[2.11] | Iron<br>[1.13]      | Oth Skin<br>[1.28]  |
| N Carolina             | Neonatal<br>[0.96] | Congenital<br>[0.99] | URI<br>[1.21]        | ASD<br>[1.34]        | Diarrhea<br>[0.68]  | Urticaria<br>[1.11] | Iron<br>[1.88]      | Epilepsy<br>[1.02]  | Vit A<br>[0.46]     | Oth Neuro<br>[1.45] |
| N Dakota               | Neonatal<br>[1.04] | Congenital<br>[1.33] | URI<br>[1.23]        | ASD<br>[1.19]        | Diarrhea<br>[0.63]  | Urticaria<br>[0.99] | Iron<br>[2.52]      | Epilepsy<br>[0.97]  | Other MN<br>[2.1]   | Oth Skin<br>[1.08]  |
| Ohio                   | Neonatal<br>[1.0]  | Congenital<br>[1.12] | URI<br>[1.22]        | ASD<br>[1.16]        | Diarrhea<br>[0.74]  | Urticaria<br>[1.09] | Epilepsy<br>[1.33]  | Iron<br>[1.85]      | Oth Neuro<br>[1.88] | Oth Skin<br>[1.09]  |
| Oklahoma               | Neonatal<br>[0.92] | Congenital<br>[0.93] | URI<br>[1.21]        | ASD<br>[1.14]        | Diarrhea<br>[0.64]  | Urticaria<br>[0.93] | Epilepsy<br>[1.16]  | Iron<br>[1.29]      | Oth Neuro<br>[1.65] | Med Treat<br>[6.97] |
| Oregon                 | Neonatal<br>[0.88] | Congenital<br>[0.93] | URI<br>[1.22]        | Iron<br>[4.36]       | ASD<br>[1.18]       | Diarrhea<br>[0.64]  | Urticaria<br>[1.07] | Epilepsy<br>[1.08]  | Vit A<br>[0.75]     | Med Treat<br>[7.42] |
| Pennsylvania           | Neonatal<br>[1.06] | Congenital<br>[1.18] | URI<br>[1.23]        | ASD<br>[1.08]        | Diarrhea<br>[0.77]  | Iron<br>[3.36]      | Urticaria<br>[1.14] | Epilepsy<br>[1.37]  | Oth Neuro<br>[1.93] | Vit A<br>[0.64]     |
| Rhode Island           | Neonatal<br>[1.02] | Congenital<br>[1.01] | URI<br>[1.23]        | Diarrhea<br>[0.95]   | ASD<br>[1.21]       | Urticaria<br>[1.24] | Epilepsy<br>[1.32]  | Iron<br>[2.18]      | Oth Neuro<br>[1.86] | Oth Skin<br>[1.17]  |
| S Carolina             | Neonatal<br>[0.91] | Congenital<br>[0.93] | URI<br>[1.21]        | ASD<br>[0.98]        | Diarrhea<br>[0.63]  | Urticaria<br>[1.13] | Epilepsy<br>[1.01]  | Iron<br>[1.25]      | ID<br>[2.54]        | Oth Skin<br>[1.23]  |
| S Dakota               | Neonatal<br>[0.85] | Congenital<br>[0.98] | URI<br>[1.22]        | ASD<br>[1.16]        | Diarrhea<br>[0.63]  | Urticaria<br>[0.93] | Iron<br>[1.8]       | Epilepsy<br>[0.97]  | ID<br>[2.23]        | Vit A<br>[0.45]     |
| Tennessee              | Neonatal<br>[0.91] | Congenital<br>[0.83] | URI<br>[1.2]         | ASD<br>[1.48]        | Diarrhea<br>[0.62]  | Urticaria<br>[0.99] | Iron<br>[1.42]      | Epilepsy<br>[1.03]  | Vit A<br>[0.47]     | Oth Neuro<br>[1.46] |
| Texas                  | Neonatal<br>[1.04] | Congenital<br>[0.86] | URI<br>[1.21]        | ASD<br>[1.6]         | Iron<br>[2.45]      | Urticaria<br>[1.02] | Diarrhea<br>[0.53]  | Epilepsy<br>[1.12]  | Oth Neuro<br>[1.58] | Med Treat<br>[6.86] |
| Utah                   | Neonatal<br>[0.88] | Congenital<br>[0.87] | ASD<br>[1.92]        | URI<br>[1.22]        | Diarrhea<br>[0.57]  | Iron<br>[2.21]      | Urticaria<br>[0.94] | Epilepsy<br>[0.87]  | Med Treat<br>[7.53] | Other MN<br>[2.82]  |
| Vermont                | Neonatal<br>[1.08] | Congenital<br>[0.98] | URI<br>[1.24]        | ASD<br>[1.22]        | Diarrhea<br>[0.88]  | Iron<br>[3.23]      | Urticaria<br>[1.02] | Epilepsy<br>[1.0]   | ID<br>[2.45]        | Falls<br>[0.37]     |
| Virginia               | Neonatal<br>[1.14] | Congenital<br>[0.9]  | URI<br>[1.23]        | ASD<br>[1.2]         | Diarrhea<br>[0.79]  | Urticaria<br>[1.26] | Epilepsy<br>[1.32]  | Iron<br>[1.93]      | Med Treat<br>[7.4]  | Oth Neuro<br>[1.87] |
| Washington             | Neonatal<br>[0.96] | Congenital<br>[1.01] | URI<br>[1.23]        | ASD<br>[1.2]         | Urticaria<br>[1.25] | Diarrhea<br>[0.69]  | Iron<br>[2.39]      | Epilepsy<br>[1.08]  | Oth Skin<br>[1.21]  | Falls<br>[0.4]      |
| W Virginia             | Neonatal<br>[0.97] | Congenital<br>[0.84] | URI<br>[1.2]         | Diarrhea<br>[0.66]   | ASD<br>[0.85]       | Urticaria<br>[0.9]  | Iron<br>[1.51]      | Epilepsy<br>[1.29]  | Oth Neuro<br>[1.83] | ID<br>[2.3]         |
| Wisconsin              | Neonatal<br>[1.06] | Congenital<br>[1.07] | URI<br>[1.23]        | ASD<br>[1.07]        | Diarrhea<br>[0.64]  | Urticaria<br>[1.13] | Iron<br>[2.62]      | Epilepsy<br>[1.15]  | Blindness<br>[1.28] | Falls<br>[0.44]     |
| Wyoming                | Neonatal<br>[0.86] | Congenital<br>[1.01] | URI<br>[1.22]        | ASD<br>[1.17]        | Iron<br>[3.71]      | Diarrhea<br>[0.63]  | Urticaria<br>[0.87] | Epilepsy<br>[1.09]  | Whooping<br>[2.06]  | ID<br>[2.28]        |
| Southern Latin America | Neonatal<br>[0.93] | Diarrhea<br>[2.35]   | Congenital<br>[0.78] | Iron<br>[1.41]       | Vit A<br>[0.66]     | Hernia<br>[1.99]    | URI<br>[0.9]        | ASD<br>[1.08]       | PEM<br>[25.19]      | Urticaria<br>[0.78] |
| Argentina              | Diarrhea<br>[2.36] | Neonatal<br>[0.88]   | Congenital<br>[0.79] | Iron<br>[1.42]       | Hernia<br>[2.1]     | Vit A<br>[0.57]     | PEM<br>[27.55]      | URI<br>[0.9]        | ASD<br>[1.08]       | Urticaria<br>[0.77] |
| Chile                  | Neonatal<br>[1.07] | Diarrhea<br>[2.41]   | Congenital<br>[0.77] | Vit A<br>[0.97]      | Iron<br>[1.25]      | Hernia<br>[1.69]    | URI<br>[0.89]       | ASD<br>[1.07]       | Epilepsy<br>[1.43]  | Urticaria<br>[0.81] |
| Uruguay                | Neonatal<br>[0.96] | Diarrhea<br>[1.72]   | Iron<br>[1.67]       | Congenital<br>[0.76] | Vit A<br>[0.71]     | Hernia<br>[2.16]    | URI<br>[0.91]       | ASD<br>[1.09]       | Urticaria<br>[0.77] | Epilepsy<br>[0.83]  |
| Western Europe         | Neonatal<br>[0.91] | Congenital<br>[1.01] | Diarrhea<br>[1.17]   | URI<br>[1.19]        | Hernia<br>[1.11]    | ASD<br>[1.04]       | Epilepsy<br>[1.08]  | Urticaria<br>[0.66] | Iron<br>[1.33]      | Falls<br>[0.84]     |

**eFigure 9b. Leading ten causes of YLDs with the ratio of observed YLDs to YLDs expected on the basis of Socio-Demographic Index alone in 2017, <1 years, both sexes combined.**  
The top ten causes contributing to YLDs are listed globally, by socio-demographic quintile, and then by GBD superregion, region, country, and subnationally where modeled. For each cell, the ratio of observed YLDs to YLDs expected on the basis of socio-demographic index (SDI) alone are listed. Abbreviations: YLD=year of life lived with disability, GBD=Global Burden of Disease.

Values shown in brackets represent the ratio of observed YLDs to predicted YLDs on the basis of Socio-Demographic Index (SDI), rounded to two (2) digits. Color ranges (shown below) were calculated to place a roughly equal number of cells into each bin.

| COLOR KEY:           |                      | [0.0-0.68]           | [0.68-0.82]        | [0.82-0.91]        | [0.91-1.01]        | [1.01-1.1]          | [1.1-1.21]          | [1.21-1.45]         | [1.45-2.25]         | 2.25+              |
|----------------------|----------------------|----------------------|--------------------|--------------------|--------------------|---------------------|---------------------|---------------------|---------------------|--------------------|
|                      | 1                    | 2                    | 3                  | 4                  | 5                  | 6                   | 7                   | 8                   | 9                   | 10                 |
| Andorra              | Neonatal<br>[1.02]   | Congenital<br>[1.11] | URI<br>[1.21]      | Diarrhea<br>[1.26] | Hernia<br>[0.91]   | ASD<br>[1.09]       | Urticaria<br>[0.79] | Epilepsy<br>[1.06]  | Falls<br>[0.72]     | Otitis<br>[1.3]    |
| Austria              | Neonatal<br>[1.43]   | Congenital<br>[1.05] | Hernia<br>[1.99]   | Diarrhea<br>[1.75] | URI<br>[1.19]      | ASD<br>[1.04]       | Urticaria<br>[0.7]  | Falls<br>[0.86]     | Epilepsy<br>[0.89]  | Vit A<br>[0.86]    |
| Belgium              | Congenital<br>[1.08] | Neonatal<br>[0.71]   | Diarrhea<br>[1.4]  | URI<br>[1.19]      | Hernia<br>[1.24]   | ASD<br>[1.06]       | Epilepsy<br>[1.36]  | Urticaria<br>[0.75] | Falls<br>[0.85]     | Otitis<br>[1.3]    |
| Cyprus               | Neonatal<br>[1.15]   | Congenital<br>[1.04] | Hernia<br>[2.11]   | Diarrhea<br>[1.33] | URI<br>[1.19]      | ASD<br>[1.04]       | Urticaria<br>[0.7]  | Falls<br>[0.79]     | Epilepsy<br>[0.86]  | Vit A<br>[0.85]    |
| Denmark              | Congenital<br>[1.23] | Neonatal<br>[0.84]   | Diarrhea<br>[2.3]  | URI<br>[1.22]      | ASD<br>[1.3]       | Hernia<br>[0.56]    | Urticaria<br>[0.91] | Iron<br>[2.73]      | Falls<br>[0.68]     | Epilepsy<br>[1.04] |
| Finland              | Neonatal<br>[1.93]   | Congenital<br>[1.16] | Diarrhea<br>[1.89] | URI<br>[1.2]       | Hernia<br>[0.93]   | ASD<br>[1.09]       | Urticaria<br>[0.77] | Otitis<br>[1.83]    | Falls<br>[0.82]     | Epilepsy<br>[1.07] |
| France               | Neonatal<br>[0.76]   | Congenital<br>[1.02] | URI<br>[1.18]      | Hernia<br>[1.07]   | Diarrhea<br>[0.89] | ASD<br>[0.97]       | Urticaria<br>[0.73] | Epilepsy<br>[1.02]  | Falls<br>[0.86]     | Otitis<br>[1.28]   |
| Germany              | Neonatal<br>[1.15]   | Congenital<br>[0.99] | Diarrhea<br>[1.88] | Hernia<br>[1.56]   | URI<br>[1.18]      | Epilepsy<br>[2.3]   | ASD<br>[1.05]       | Urticaria<br>[0.72] | Oth Neuro<br>[3.23] | Falls<br>[0.83]    |
| Greece               | Neonatal<br>[0.85]   | Congenital<br>[0.95] | URI<br>[1.17]      | Diarrhea<br>[0.88] | Hernia<br>[1.25]   | ASD<br>[1.01]       | Iron<br>[1.13]      | Vit A<br>[0.67]     | Urticaria<br>[0.59] | Otitis<br>[1.57]   |
| Iceland              | Neonatal<br>[1.03]   | Congenital<br>[1.01] | Diarrhea<br>[1.41] | URI<br>[1.2]       | ASD<br>[1.06]      | Urticaria<br>[0.8]  | Hernia<br>[0.31]    | Falls<br>[0.71]     | Epilepsy<br>[0.99]  | Vit A<br>[1.27]    |
| Ireland              | Neonatal<br>[0.86]   | Congenital<br>[1.1]  | URI<br>[1.19]      | Diarrhea<br>[1.08] | Hernia<br>[1.0]    | ASD<br>[1.13]       | Falls<br>[0.99]     | Urticaria<br>[0.73] | Vit A<br>[1.26]     | Epilepsy<br>[1.04] |
| Israel               | Neonatal<br>[0.9]    | Congenital<br>[0.95] | URI<br>[1.17]      | Hernia<br>[1.18]   | Diarrhea<br>[0.72] | ASD<br>[0.94]       | Blindness<br>[3.55] | Vit A<br>[0.95]     | Urticaria<br>[0.58] | Iron<br>[0.78]     |
| Italy                | Congenital<br>[0.98] | Neonatal<br>[0.67]   | URI<br>[1.18]      | Hernia<br>[1.14]   | Diarrhea<br>[0.73] | ASD<br>[1.03]       | Vit A<br>[1.59]     | Urticaria<br>[0.49] | Epilepsy<br>[0.74]  | Falls<br>[0.73]    |
| Luxembourg           | Neonatal<br>[1.36]   | Congenital<br>[1.14] | Hernia<br>[1.67]   | Diarrhea<br>[1.72] | URI<br>[1.22]      | ASD<br>[1.11]       | Urticaria<br>[0.84] | Epilepsy<br>[1.26]  | Falls<br>[0.68]     | Otitis<br>[1.32]   |
| Malta                | Congenital<br>[1.15] | Neonatal<br>[0.72]   | Hernia<br>[1.97]   | URI<br>[1.17]      | ASD<br>[1.03]      | Diarrhea<br>[0.63]  | Falls<br>[1.24]     | Urticaria<br>[0.63] | Vit A<br>[0.78]     | Epilepsy<br>[0.74] |
| Netherlands          | Neonatal<br>[1.04]   | Congenital<br>[1.12] | URI<br>[1.21]      | Hernia<br>[0.9]    | ASD<br>[1.22]      | Diarrhea<br>[0.99]  | Urticaria<br>[0.82] | Vit A<br>[1.55]     | Falls<br>[0.68]     | Epilepsy<br>[1.04] |
| Norway               | Neonatal<br>[1.23]   | Congenital<br>[1.43] | URI<br>[1.25]      | ASD<br>[1.04]      | Hernia<br>[0.47]   | Urticaria<br>[0.82] | Falls<br>[0.78]     | Other MN<br>[4.21]  | Epilepsy<br>[1.18]  | Diarrhea<br>[0.35] |
| Portugal             | Neonatal<br>[0.56]   | Congenital<br>[0.77] | URI<br>[1.17]      | Diarrhea<br>[0.65] | Vit A<br>[0.92]    | ASD<br>[1.0]        | Hernia<br>[1.06]    | Urticaria<br>[0.66] | Urticaria<br>[0.54] | Otitis<br>[1.23]   |
| Spain                | Neonatal<br>[0.72]   | Congenital<br>[0.88] | URI<br>[1.17]      | Diarrhea<br>[0.81] | Hernia<br>[1.17]   | ASD<br>[1.01]       | Iron<br>[1.73]      | ID<br>[5.51]        | Urticaria<br>[0.6]  | Falls<br>[0.94]    |
| Sweden               | Congenital<br>[1.32] | Neonatal<br>[0.87]   | Diarrhea<br>[1.65] | URI<br>[1.22]      | ASD<br>[1.17]      | Hernia<br>[0.51]    | Urticaria<br>[0.82] | Falls<br>[0.77]     | Iron<br>[1.65]      | Vit A<br>[1.05]    |
| Stockholm            | Congenital<br>[1.42] | Neonatal<br>[0.87]   | Diarrhea<br>[1.83] | URI<br>[1.25]      | ASD<br>[1.53]      | Iron<br>[5.72]      | Vit A<br>[2.6]      | Hernia<br>[0.46]    | Urticaria<br>[0.91] | Falls<br>[0.68]    |
| Sweden w/o Stockholm | Congenital<br>[1.29] | Neonatal<br>[0.87]   | Diarrhea<br>[1.59] | URI<br>[1.22]      | ASD<br>[1.06]      | Hernia<br>[0.53]    | Urticaria<br>[0.79] | Falls<br>[0.8]      | Epilepsy<br>[0.82]  | Vit A<br>[0.7]     |
| Switzerland          | Neonatal<br>[0.91]   | Congenital<br>[1.08] | Diarrhea<br>[2.28] | URI<br>[1.2]       | Hernia<br>[1.09]   | ASD<br>[1.08]       | Vit A<br>[1.8]      | Urticaria<br>[0.76] | Iron<br>[1.92]      | Falls<br>[0.6]     |
| UK                   | Neonatal<br>[1.01]   | Congenital<br>[1.04] | Diarrhea<br>[1.27] | URI<br>[1.2]       | Iron<br>[3.15]     | ASD<br>[1.1]        | Hernia<br>[0.73]    | Urticaria<br>[0.65] | Epilepsy<br>[0.86]  | Vit A<br>[0.75]    |
| England              | Neonatal<br>[1.04]   | Congenital<br>[1.03] | Diarrhea<br>[1.33] | URI<br>[1.21]      | Iron<br>[3.42]     | ASD<br>[1.12]       | Hernia<br>[0.65]    | Urticaria<br>[0.66] | Epilepsy<br>[0.87]  | Falls<br>[0.87]    |
| E Midlands           | Neonatal<br>[0.95]   | Congenital<br>[1.02] | Diarrhea<br>[1.24] | Iron<br>[3.68]     | URI<br>[1.2]       | ASD<br>[1.08]       | Hernia<br>[0.73]    | Urticaria<br>[0.62] | Epilepsy<br>[0.8]   | Falls<br>[0.94]    |
| Derby                | Neonatal<br>[0.99]   | Congenital<br>[1.05] | Iron<br>[5.65]     | Diarrhea<br>[1.18] | URI<br>[1.2]       | ASD<br>[1.09]       | Hernia<br>[0.73]    | Urticaria<br>[0.65] | Epilepsy<br>[0.86]  | Falls<br>[0.91]    |
| Derbyshire           | Neonatal<br>[0.86]   | Congenital<br>[1.0]  | Diarrhea<br>[1.18] | URI<br>[1.2]       | Iron<br>[2.58]     | ASD<br>[1.08]       | Hernia<br>[0.82]    | Urticaria<br>[0.6]  | Vit A<br>[0.55]     | Falls<br>[1.0]     |
| Leicester            | Neonatal<br>[0.85]   | Congenital<br>[1.05] | Diarrhea<br>[1.25] | URI<br>[1.2]       | Iron<br>[3.39]     | ASD<br>[1.09]       | Hernia<br>[0.65]    | Urticaria<br>[0.64] | Vit A<br>[0.79]     | Epilepsy<br>[0.84] |
| Leicestershire       | Neonatal<br>[0.84]   | Congenital<br>[1.04] | Diarrhea<br>[1.24] | URI<br>[1.21]      | Iron<br>[4.17]     | ASD<br>[1.1]        | Hernia<br>[0.7]     | Urticaria<br>[0.66] | Epilepsy<br>[0.85]  | Falls<br>[0.9]     |
| Lincolnshire         | Neonatal<br>[0.9]    | Congenital<br>[1.0]  | Iron<br>[3.78]     | Diarrhea<br>[1.18] | URI<br>[1.19]      | ASD<br>[1.08]       | Hernia<br>[0.76]    | Urticaria<br>[0.59] | Epilepsy<br>[0.75]  | Falls<br>[1.0]     |

**eFigure 9b. Leading ten causes of YLDs with the ratio of observed YLDs to YLDs expected on the basis of Socio-Demographic Index alone in 2017, <1 years, both sexes combined.**  
The top ten causes contributing to YLDs are listed globally, by socio-demographic quintile, and then by GBD superregion, region, country, and subnationally where modeled. For each cell, the ratio of observed YLDs to YLDs expected on the basis of socio-demographic index (SDI) alone are listed. Abbreviations: YLD=year of life lived with disability, GBD=Global Burden of Disease.

Values shown in brackets represent the ratio of observed YLDs to predicted YLDs on the basis of Socio-Demographic Index (SDI), rounded to two (2) digits. Color ranges (shown below) were calculated to place a roughly equal number of cells into each bin.

| COLOR KEY:           |                    | [0.0-0.68]           | [0.68-0.82]        | [0.82-0.91]        | [0.91-1.01]        | [1.01-1.1]       | [1.1-1.21]          | [1.21-1.45]         | [1.45-2.25]        | 2.25+              |
|----------------------|--------------------|----------------------|--------------------|--------------------|--------------------|------------------|---------------------|---------------------|--------------------|--------------------|
|                      | 1                  | 2                    | 3                  | 4                  | 5                  | 6                | 7                   | 8                   | 9                  | 10                 |
| Northamptonshire     | Neonatal<br>[1.04] | Congenital<br>[1.02] | Diarrhea<br>[1.38] | URI<br>[1.2]       | Iron<br>[3.34]     | ASD<br>[1.08]    | Hernia<br>[0.71]    | Urticaria<br>[0.63] | Epilepsy<br>[0.8]  | Falls<br>[0.94]    |
| Nottingham           | Neonatal<br>[1.21] | Congenital<br>[1.09] | Diarrhea<br>[1.3]  | URI<br>[1.22]      | Iron<br>[3.71]     | ASD<br>[1.12]    | Hernia<br>[0.66]    | Urticaria<br>[0.7]  | Epilepsy<br>[0.98] | Falls<br>[0.83]    |
| Nottinghamshire      | Neonatal<br>[1.0]  | Congenital<br>[1.0]  | Diarrhea<br>[1.18] | Iron<br>[3.37]     | URI<br>[1.2]       | ASD<br>[1.08]    | Hernia<br>[0.8]     | Urticaria<br>[0.6]  | Falls<br>[1.0]     | Epilepsy<br>[0.74] |
| Rutland              | Neonatal<br>[0.71] | Congenital<br>[1.02] | URI<br>[1.2]       | Iron<br>[3.64]     | Diarrhea<br>[1.03] | ASD<br>[1.09]    | Urticaria<br>[0.63] | Hernia<br>[0.43]    | Epilepsy<br>[0.8]  | Falls<br>[0.91]    |
| E England            | Neonatal<br>[0.93] | Congenital<br>[0.97] | Diarrhea<br>[1.24] | URI<br>[1.2]       | Iron<br>[3.51]     | ASD<br>[1.15]    | Hernia<br>[0.56]    | Urticaria<br>[0.64] | Epilepsy<br>[0.81] | Falls<br>[0.9]     |
| Bedford              | Neonatal<br>[1.12] | Congenital<br>[0.99] | Diarrhea<br>[1.21] | URI<br>[1.2]       | Iron<br>[3.29]     | ASD<br>[1.09]    | Urticaria<br>[0.65] | Hernia<br>[0.45]    | Vit A<br>[0.75]    | Epilepsy<br>[0.83] |
| Cambridgeshire       | Neonatal<br>[0.99] | Congenital<br>[1.03] | Diarrhea<br>[1.43] | URI<br>[1.22]      | ASD<br>[1.69]      | Iron<br>[2.75]   | Urticaria<br>[0.71] | Hernia<br>[0.41]    | Falls<br>[0.81]    | Epilepsy<br>[0.91] |
| Cen Bedfordshire     | Neonatal<br>[1.0]  | Congenital<br>[0.95] | Diarrhea<br>[1.28] | URI<br>[1.2]       | Iron<br>[3.29]     | ASD<br>[1.09]    | Hernia<br>[0.57]    | Urticaria<br>[0.63] | Epilepsy<br>[0.79] | Falls<br>[0.91]    |
| Essex                | Neonatal<br>[0.9]  | Congenital<br>[0.96] | Iron<br>[3.86]     | Diarrhea<br>[1.14] | URI<br>[1.2]       | ASD<br>[1.09]    | Hernia<br>[0.54]    | Urticaria<br>[0.62] | Epilepsy<br>[0.78] | Falls<br>[0.93]    |
| Hertfordshire        | Neonatal<br>[0.98] | Congenital<br>[1.01] | Diarrhea<br>[1.34] | URI<br>[1.22]      | Iron<br>[4.07]     | ASD<br>[1.13]    | Hernia<br>[0.48]    | Urticaria<br>[0.71] | Epilepsy<br>[0.93] | Falls<br>[0.8]     |
| Luton                | Neonatal<br>[1.05] | Congenital<br>[0.98] | Diarrhea<br>[1.37] | Iron<br>[4.09]     | URI<br>[1.2]       | ASD<br>[1.08]    | Hernia<br>[0.68]    | Urticaria<br>[0.63] | Epilepsy<br>[0.83] | Falls<br>[0.95]    |
| Norfolk              | Neonatal<br>[0.79] | Congenital<br>[0.95] | Diarrhea<br>[1.24] | URI<br>[1.2]       | Iron<br>[2.99]     | ASD<br>[1.09]    | Hernia<br>[0.76]    | Urticaria<br>[0.62] | Falls<br>[0.96]    | Epilepsy<br>[0.75] |
| Peterborough         | Neonatal<br>[0.76] | Congenital<br>[0.95] | Diarrhea<br>[1.2]  | URI<br>[1.2]       | Iron<br>[2.67]     | ASD<br>[1.07]    | Hernia<br>[0.8]     | Urticaria<br>[0.61] | Epilepsy<br>[0.78] | Falls<br>[0.98]    |
| Southend-on-Sea      | Neonatal<br>[1.04] | Congenital<br>[0.95] | Iron<br>[3.58]     | Diarrhea<br>[0.98] | URI<br>[1.2]       | ASD<br>[1.07]    | Hernia<br>[0.7]     | Urticaria<br>[0.59] | Vit A<br>[0.59]    | Epilepsy<br>[0.72] |
| Suffolk              | Neonatal<br>[0.93] | Congenital<br>[0.94] | Diarrhea<br>[1.18] | URI<br>[1.2]       | Iron<br>[2.61]     | ASD<br>[1.09]    | Hernia<br>[0.63]    | Urticaria<br>[0.61] | Falls<br>[0.97]    | Epilepsy<br>[0.73] |
| Thurrock             | Neonatal<br>[0.97] | Congenital<br>[0.93] | Iron<br>[2.58]     | Diarrhea<br>[0.97] | URI<br>[1.2]       | ASD<br>[1.07]    | Urticaria<br>[0.59] | Hernia<br>[0.5]     | Epilepsy<br>[0.71] | Falls<br>[1.04]    |
| Greater London       | Neonatal<br>[1.17] | Congenital<br>[1.1]  | Diarrhea<br>[1.44] | URI<br>[1.23]      | ASD<br>[1.17]      | Hernia<br>[0.5]  | Iron<br>[2.79]      | Urticaria<br>[0.78] | Epilepsy<br>[1.05] | Falls<br>[0.73]    |
| Barking & Dagenham   | Neonatal<br>[0.95] | Congenital<br>[0.94] | Diarrhea<br>[0.99] | URI<br>[1.2]       | ASD<br>[1.07]      | Iron<br>[1.03]   | Hernia<br>[0.68]    | Urticaria<br>[0.58] | Epilepsy<br>[0.74] | Falls<br>[1.04]    |
| Barnet               | Neonatal<br>[1.05] | Congenital<br>[1.01] | Diarrhea<br>[1.22] | URI<br>[1.21]      | ASD<br>[1.13]      | Hernia<br>[0.56] | Iron<br>[2.2]       | Urticaria<br>[0.7]  | Epilepsy<br>[0.91] | Falls<br>[0.81]    |
| Bexley               | Neonatal<br>[0.93] | Congenital<br>[0.95] | Diarrhea<br>[1.18] | URI<br>[1.2]       | ASD<br>[1.15]      | Iron<br>[1.74]   | Hernia<br>[0.74]    | Urticaria<br>[0.61] | Falls<br>[0.94]    | Epilepsy<br>[0.75] |
| Brent                | Neonatal<br>[1.07] | Congenital<br>[0.99] | Diarrhea<br>[1.17] | URI<br>[1.21]      | ASD<br>[1.1]       | Hernia<br>[0.5]  | Urticaria<br>[0.67] | Iron<br>[1.19]      | Epilepsy<br>[0.84] | Falls<br>[0.84]    |
| Bromley              | Neonatal<br>[1.12] | Congenital<br>[0.99] | URI<br>[1.21]      | Diarrhea<br>[1.11] | ASD<br>[1.18]      | Iron<br>[2.49]   | Hernia<br>[0.58]    | Urticaria<br>[0.66] | Falls<br>[0.86]    | Epilepsy<br>[0.83] |
| Camden               | Neonatal<br>[1.13] | Congenital<br>[1.18] | URI<br>[1.27]      | Diarrhea<br>[1.6]  | ASD<br>[1.22]      | Hernia<br>[0.4]  | Iron<br>[3.98]      | Urticaria<br>[0.89] | Epilepsy<br>[1.21] | Falls<br>[0.67]    |
| Croydon              | Neonatal<br>[1.0]  | Congenital<br>[0.97] | Diarrhea<br>[1.08] | URI<br>[1.2]       | ASD<br>[1.09]      | Iron<br>[1.94]   | Hernia<br>[0.71]    | Urticaria<br>[0.63] | Epilepsy<br>[0.79] | Falls<br>[0.9]     |
| Ealing               | Neonatal<br>[1.18] | Congenital<br>[1.01] | Diarrhea<br>[1.28] | URI<br>[1.21]      | ASD<br>[1.11]      | Hernia<br>[0.56] | Iron<br>[2.0]       | Urticaria<br>[0.7]  | Epilepsy<br>[0.91] | Falls<br>[0.8]     |
| Enfield              | Neonatal<br>[1.05] | Congenital<br>[0.98] | Diarrhea<br>[1.21] | URI<br>[1.2]       | ASD<br>[1.1]       | Hernia<br>[0.63] | Urticaria<br>[0.65] | Epilepsy<br>[0.84]  | Iron<br>[1.05]     | Falls<br>[0.88]    |
| Greenwich            | Neonatal<br>[0.98] | Congenital<br>[0.99] | Diarrhea<br>[1.24] | URI<br>[1.2]       | ASD<br>[1.15]      | Iron<br>[1.88]   | Hernia<br>[0.73]    | Urticaria<br>[0.63] | Epilepsy<br>[0.81] | Falls<br>[0.9]     |
| Hackney              | Neonatal<br>[1.16] | Congenital<br>[1.07] | Diarrhea<br>[1.43] | URI<br>[1.23]      | ASD<br>[1.13]      | Hernia<br>[0.52] | Iron<br>[2.21]      | Urticaria<br>[0.75] | Epilepsy<br>[1.07] | Falls<br>[0.78]    |
| Hammersmith & Fulham | Neonatal<br>[1.23] | Congenital<br>[1.17] | Diarrhea<br>[1.68] | URI<br>[1.26]      | ASD<br>[1.2]       | Iron<br>[4.55]   | Urticaria<br>[0.87] | Hernia<br>[0.37]    | Epilepsy<br>[1.21] | Falls<br>[0.67]    |
| Haringey             | Neonatal<br>[1.14] | Congenital<br>[1.02] | Diarrhea<br>[1.25] | URI<br>[1.21]      | ASD<br>[1.1]       | Hernia<br>[0.59] | Iron<br>[1.86]      | Urticaria<br>[0.68] | Epilepsy<br>[0.89] | Falls<br>[0.82]    |
| Harrow               | Neonatal<br>[1.16] | Congenital<br>[1.0]  | Diarrhea<br>[1.26] | URI<br>[1.21]      | ASD<br>[1.11]      | Hernia<br>[0.6]  | Iron<br>[1.63]      | Urticaria<br>[0.66] | Other MN<br>[4.79] | Epilepsy<br>[0.85] |

**eFigure 9b. Leading ten causes of YLDs with the ratio of observed YLDs to YLDs expected on the basis of Socio-Demographic Index alone in 2017, <1 years, both sexes combined.**  
The top ten causes contributing to YLDs are listed globally, by socio-demographic quintile, and then by GBD superregion, region, country, and subnationally where modeled. For each cell, the ratio of observed YLDs to YLDs expected on the basis of socio-demographic index (SDI) alone are listed. Abbreviations: YLD=year of life lived with disability, GBD=Global Burden of Disease.

Values shown in brackets represent the ratio of observed YLDs to predicted YLDs on the basis of Socio-Demographic Index (SDI), rounded to two (2) digits. Color ranges (shown below) were calculated to place a roughly equal number of cells into each bin.

| COLOR KEY:           |                    | [0.0-0.68]           | [0.68-0.82]        | [0.82-0.91]        | [0.91-1.01]    | [1.01-1.1]          | [1.1-1.21]          | [1.21-1.45]         | [1.45-2.25]         | 2.25+              |
|----------------------|--------------------|----------------------|--------------------|--------------------|----------------|---------------------|---------------------|---------------------|---------------------|--------------------|
|                      | 1                  | 2                    | 3                  | 4                  | 5              | 6                   | 7                   | 8                   | 9                   | 10                 |
| Havering             | Neonatal<br>[0.96] | Congenital<br>[0.95] | Diarrhea<br>[1.09] | URI<br>[1.2]       | Iron<br>[2.89] | ASD<br>[1.09]       | Hernia<br>[0.65]    | Urticaria<br>[0.62] | Epilepsy<br>[0.79]  | Falls<br>[0.95]    |
| Hillingdon           | Neonatal<br>[1.25] | Congenital<br>[1.05] | Diarrhea<br>[1.47] | URI<br>[1.22]      | ASD<br>[1.13]  | Hernia<br>[0.57]    | Iron<br>[2.37]      | Urticaria<br>[0.73] | Epilepsy<br>[0.99]  | Falls<br>[0.76]    |
| Hounslow             | Neonatal<br>[1.19] | Congenital<br>[1.05] | Diarrhea<br>[1.36] | URI<br>[1.22]      | ASD<br>[1.14]  | Hernia<br>[0.52]    | Iron<br>[2.29]      | Urticaria<br>[0.74] | Epilepsy<br>[0.99]  | Falls<br>[0.77]    |
| Islington            | Neonatal<br>[1.08] | Congenital<br>[1.16] | Diarrhea<br>[1.57] | URI<br>[1.26]      | ASD<br>[1.2]   | Hernia<br>[0.44]    | Urticaria<br>[0.86] | Epilepsy<br>[1.26]  | Falls<br>[0.68]     | Iron<br>[2.26]     |
| Kensington & Chelsea | Neonatal<br>[1.08] | Congenital<br>[1.18] | URI<br>[1.27]      | Diarrhea<br>[1.53] | ASD<br>[1.23]  | Urticaria<br>[0.89] | Hernia<br>[0.32]    | Other MN<br>[3.71]  | Epilepsy<br>[1.2]   | Falls<br>[0.66]    |
| Kingston upon Thames | Neonatal<br>[1.22] | Congenital<br>[1.08] | Diarrhea<br>[1.44] | URI<br>[1.23]      | ASD<br>[1.16]  | Hernia<br>[0.46]    | Urticaria<br>[0.76] | Epilepsy<br>[1.04]  | Other MN<br>[4.26]  | Iron<br>[1.85]     |
| Lambeth              | Neonatal<br>[0.9]  | Congenital<br>[1.13] | Diarrhea<br>[1.42] | URI<br>[1.24]      | ASD<br>[1.16]  | Hernia<br>[0.5]     | Iron<br>[3.16]      | Urticaria<br>[0.79] | Epilepsy<br>[1.09]  | Falls<br>[0.72]    |
| Lewisham             | Neonatal<br>[1.22] | Congenital<br>[1.01] | URI<br>[1.2]       | Diarrhea<br>[1.11] | ASD<br>[1.17]  | Hernia<br>[0.64]    | Iron<br>[1.77]      | Urticaria<br>[0.65] | Epilepsy<br>[0.85]  | Falls<br>[0.86]    |
| Merton               | Neonatal<br>[1.12] | Congenital<br>[1.05] | URI<br>[1.22]      | Diarrhea<br>[1.26] | ASD<br>[1.14]  | Iron<br>[2.69]      | Hernia<br>[0.57]    | Urticaria<br>[0.72] | Epilepsy<br>[0.97]  | Falls<br>[0.78]    |
| Newham               | Neonatal<br>[1.08] | Congenital<br>[1.0]  | Diarrhea<br>[1.21] | URI<br>[1.21]      | ASD<br>[1.09]  | Hernia<br>[0.51]    | Urticaria<br>[0.64] | Iron<br>[1.17]      | Epilepsy<br>[0.83]  | Falls<br>[0.86]    |
| Redbridge            | Neonatal<br>[0.98] | Congenital<br>[1.01] | Diarrhea<br>[1.12] | URI<br>[1.2]       | ASD<br>[1.09]  | Hernia<br>[0.56]    | Urticaria<br>[0.62] | Epilepsy<br>[0.79]  | Falls<br>[0.91]     | Iron<br>[0.83]     |
| Richmond upon Thames | Neonatal<br>[1.3]  | Congenital<br>[1.1]  | URI<br>[1.24]      | Diarrhea<br>[1.33] | ASD<br>[1.18]  | Hernia<br>[0.44]    | Urticaria<br>[0.79] | Falls<br>[0.72]     | Epilepsy<br>[1.01]  | Iron<br>[1.78]     |
| Southwark            | Neonatal<br>[0.93] | Congenital<br>[1.14] | Diarrhea<br>[1.49] | URI<br>[1.25]      | ASD<br>[1.25]  | Hernia<br>[0.51]    | Urticaria<br>[0.82] | Epilepsy<br>[1.19]  | Falls<br>[0.71]     | Otitis<br>[1.4]    |
| Sutton               | Neonatal<br>[1.29] | Congenital<br>[0.99] | Diarrhea<br>[1.18] | URI<br>[1.2]       | ASD<br>[1.1]   | Hernia<br>[0.64]    | Urticaria<br>[0.65] | Iron<br>[1.24]      | Epilepsy<br>[0.84]  | Falls<br>[0.87]    |
| Tower Hamlets        | Neonatal<br>[1.3]  | Congenital<br>[1.11] | Diarrhea<br>[1.5]  | URI<br>[1.25]      | ASD<br>[1.18]  | Urticaria<br>[0.81] | Iron<br>[2.52]      | Epilepsy<br>[1.16]  | Hernia<br>[0.34]    | Falls<br>[0.73]    |
| Waltham Forest       | Neonatal<br>[0.98] | Congenital<br>[0.97] | Diarrhea<br>[1.07] | URI<br>[1.2]       | ASD<br>[1.08]  | Iron<br>[1.59]      | Hernia<br>[0.63]    | Urticaria<br>[0.61] | Epilepsy<br>[0.76]  | Falls<br>[0.94]    |
| Wandsworth           | Neonatal<br>[1.07] | Congenital<br>[1.14] | URI<br>[1.25]      | Diarrhea<br>[1.43] | ASD<br>[1.19]  | Hernia<br>[0.43]    | Urticaria<br>[0.82] | Epilepsy<br>[1.14]  | Iron<br>[2.31]      | Falls<br>[0.7]     |
| Westminster          | Neonatal<br>[1.03] | Congenital<br>[1.16] | Diarrhea<br>[1.6]  | URI<br>[1.26]      | ASD<br>[1.21]  | Urticaria<br>[0.87] | Hernia<br>[0.34]    | Epilepsy<br>[1.23]  | Falls<br>[0.68]     | Other MN<br>[3.52] |
| NE England           | Neonatal<br>[0.89] | Congenital<br>[1.1]  | Diarrhea<br>[1.36] | URI<br>[1.2]       | Iron<br>[2.83] | ASD<br>[1.08]       | Hernia<br>[0.83]    | Vit A<br>[0.84]     | Urticaria<br>[0.61] | Epilepsy<br>[0.77] |
| County Durham        | Neonatal<br>[0.93] | Congenital<br>[1.09] | Diarrhea<br>[1.34] | Iron<br>[3.18]     | URI<br>[1.2]   | ASD<br>[1.07]       | Hernia<br>[0.9]     | Vit A<br>[0.79]     | Urticaria<br>[0.59] | Epilepsy<br>[0.74] |
| Darlington           | Neonatal<br>[0.86] | Congenital<br>[1.11] | Diarrhea<br>[1.36] | URI<br>[1.2]       | Iron<br>[2.21] | ASD<br>[1.07]       | Hernia<br>[0.74]    | Urticaria<br>[0.62] | Vit A<br>[0.62]     | Epilepsy<br>[0.8]  |
| Gateshead            | Neonatal<br>[0.99] | Congenital<br>[1.11] | Diarrhea<br>[1.34] | URI<br>[1.2]       | Iron<br>[3.06] | ASD<br>[1.08]       | Hernia<br>[0.89]    | Vit A<br>[0.96]     | Urticaria<br>[0.62] | Epilepsy<br>[0.81] |
| Hartlepool           | Neonatal<br>[0.95] | Congenital<br>[1.08] | Diarrhea<br>[1.14] | URI<br>[1.2]       | Iron<br>[1.5]  | ASD<br>[1.07]       | Hernia<br>[0.86]    | Vit A<br>[0.57]     | Urticaria<br>[0.57] | Epilepsy<br>[0.71] |
| Middlesbrough        | Neonatal<br>[0.79] | Congenital<br>[1.09] | Diarrhea<br>[1.37] | Iron<br>[3.41]     | URI<br>[1.2]   | ASD<br>[1.07]       | Hernia<br>[0.79]    | Vit A<br>[0.77]     | Urticaria<br>[0.59] | Epilepsy<br>[0.78] |
| Newcastle upon Tyne  | Neonatal<br>[0.95] | Congenital<br>[1.19] | Diarrhea<br>[1.66] | URI<br>[1.22]      | ASD<br>[1.12]  | Hernia<br>[0.78]    | Iron<br>[3.34]      | Vit A<br>[1.28]     | Urticaria<br>[0.71] | Epilepsy<br>[0.96] |
| N Tyneside           | Neonatal<br>[0.85] | Congenital<br>[1.11] | Diarrhea<br>[1.49] | URI<br>[1.2]       | Iron<br>[2.46] | ASD<br>[1.09]       | Hernia<br>[0.76]    | Vit A<br>[0.98]     | Urticaria<br>[0.61] | Epilepsy<br>[0.79] |
| Northumberland       | Neonatal<br>[0.84] | Congenital<br>[1.09] | Iron<br>[3.95]     | Diarrhea<br>[1.27] | URI<br>[1.2]   | ASD<br>[1.08]       | Hernia<br>[0.93]    | Vit A<br>[0.66]     | Urticaria<br>[0.59] | Epilepsy<br>[0.74] |
| Redcar & Cleveland   | Neonatal<br>[0.77] | Congenital<br>[1.07] | Diarrhea<br>[1.23] | URI<br>[1.2]       | Iron<br>[1.63] | ASD<br>[1.08]       | Hernia<br>[0.85]    | Vit A<br>[0.61]     | Urticaria<br>[0.57] | Epilepsy<br>[0.69] |
| S Tyneside           | Neonatal<br>[0.81] | Congenital<br>[1.07] | Diarrhea<br>[1.2]  | URI<br>[1.2]       | Iron<br>[1.81] | ASD<br>[1.07]       | Hernia<br>[0.85]    | Vit A<br>[0.64]     | Urticaria<br>[0.57] | Epilepsy<br>[0.69] |
| Stockton-on-Tees     | Neonatal<br>[1.06] | Congenital<br>[1.11] | Diarrhea<br>[1.35] | URI<br>[1.2]       | ASD<br>[1.07]  | Iron<br>[2.15]      | Hernia<br>[0.76]    | Vit A<br>[1.08]     | Urticaria<br>[0.61] | Epilepsy<br>[0.77] |
| Sunderland           | Neonatal<br>[0.77] | Congenital<br>[1.09] | Diarrhea<br>[1.36] | URI<br>[1.2]       | ASD<br>[1.08]  | Iron<br>[1.82]      | Hernia<br>[0.82]    | Vit A<br>[0.74]     | Urticaria<br>[0.6]  | Epilepsy<br>[0.78] |

**eFigure 9b. Leading ten causes of YLDs with the ratio of observed YLDs to YLDs expected on the basis of Socio-Demographic Index alone in 2017, <1 years, both sexes combined.**  
The top ten causes contributing to YLDs are listed globally, by socio-demographic quintile, and then by GBD superregion, region, country, and subnationally where modeled. For each cell, the ratio of observed YLDs to YLDs expected on the basis of socio-demographic index (SDI) alone are listed. Abbreviations: YLD=year of life lived with disability, GBD=Global Burden of Disease.

Values shown in brackets represent the ratio of observed YLDs to predicted YLDs on the basis of Socio-Demographic Index (SDI), rounded to two (2) digits. Color ranges (shown below) were calculated to place a roughly equal number of cells into each bin.

| COLOR KEY:            |                    | [0.0-0.68]           | [0.68-0.82]        | [0.82-0.91]        | [0.91-1.01]        | [1.01-1.1]       | [1.1-1.21]       | [1.21-1.45]         | [1.45-2.25]         | 2.25+               |
|-----------------------|--------------------|----------------------|--------------------|--------------------|--------------------|------------------|------------------|---------------------|---------------------|---------------------|
|                       | 1                  | 2                    | 3                  | 4                  | 5                  | 6                | 7                | 8                   | 9                   | 10                  |
| NW England            | Neonatal<br>[1.11] | Congenital<br>[1.09] | Diarrhea<br>[1.35] | URI<br>[1.2]       | Iron<br>[3.03]     | ASD<br>[1.09]    | Hernia<br>[0.72] | Urticaria<br>[0.63] | Epilepsy<br>[0.82]  | Falls<br>[0.93]     |
| Blackburn with Darwen | Neonatal<br>[1.05] | Congenital<br>[1.03] | Diarrhea<br>[1.27] | URI<br>[1.19]      | Iron<br>[2.29]     | ASD<br>[1.07]    | Hernia<br>[0.78] | Urticaria<br>[0.58] | Vit A<br>[0.54]     | Epilepsy<br>[0.75]  |
| Blackpool             | Neonatal<br>[0.97] | Congenital<br>[1.03] | Iron<br>[2.11]     | Diarrhea<br>[0.98] | URI<br>[1.2]       | ASD<br>[1.07]    | Hernia<br>[0.9]  | Urticaria<br>[0.56] | Vit A<br>[0.39]     | Epilepsy<br>[0.72]  |
| Bolton                | Neonatal<br>[1.0]  | Congenital<br>[1.03] | Diarrhea<br>[1.16] | URI<br>[1.2]       | Iron<br>[2.18]     | ASD<br>[1.07]    | Hernia<br>[0.81] | Urticaria<br>[0.59] | Epilepsy<br>[0.72]  | Falls<br>[1.02]     |
| Bury                  | Neonatal<br>[0.98] | Congenital<br>[1.04] | Diarrhea<br>[1.27] | URI<br>[1.2]       | Iron<br>[2.38]     | ASD<br>[1.08]    | Hernia<br>[0.7]  | Vit A<br>[0.66]     | Urticaria<br>[0.6]  | Epilepsy<br>[0.74]  |
| Cheshire E            | Neonatal<br>[1.42] | Congenital<br>[1.18] | Diarrhea<br>[1.53] | URI<br>[1.21]      | ASD<br>[1.12]      | Iron<br>[3.36]   | Hernia<br>[0.74] | Urticaria<br>[0.7]  | Epilepsy<br>[0.93]  | Falls<br>[0.82]     |
| Cheshire W & Chester  | Neonatal<br>[1.15] | Congenital<br>[1.16] | Diarrhea<br>[1.47] | URI<br>[1.21]      | Iron<br>[3.42]     | ASD<br>[1.11]    | Hernia<br>[0.78] | Urticaria<br>[0.68] | Falls<br>[0.85]     | Vit A<br>[0.79]     |
| Cumbria               | Neonatal<br>[1.07] | Congenital<br>[1.05] | Diarrhea<br>[1.38] | URI<br>[1.2]       | Iron<br>[2.95]     | ASD<br>[1.09]    | Hernia<br>[0.92] | Urticaria<br>[0.62] | Vit A<br>[0.69]     | Epilepsy<br>[0.78]  |
| Halton                | Neonatal<br>[1.11] | Congenital<br>[1.05] | Diarrhea<br>[1.32] | URI<br>[1.2]       | Iron<br>[2.57]     | ASD<br>[1.07]    | Hernia<br>[0.61] | Urticaria<br>[0.62] | Epilepsy<br>[0.81]  | Falls<br>[0.94]     |
| Knowsley              | Neonatal<br>[1.05] | Congenital<br>[1.1]  | Diarrhea<br>[1.2]  | URI<br>[1.2]       | Iron<br>[2.43]     | ASD<br>[1.07]    | Hernia<br>[0.7]  | Urticaria<br>[0.6]  | Epilepsy<br>[0.78]  | Falls<br>[0.99]     |
| Lancashire            | Neonatal<br>[1.06] | Congenital<br>[1.06] | Diarrhea<br>[1.43] | URI<br>[1.2]       | Iron<br>[2.54]     | ASD<br>[1.08]    | Hernia<br>[0.8]  | Urticaria<br>[0.62] | Epilepsy<br>[0.8]   | Falls<br>[0.95]     |
| Liverpool             | Neonatal<br>[1.23] | Congenital<br>[1.17] | Iron<br>[5.81]     | Diarrhea<br>[1.32] | URI<br>[1.21]      | ASD<br>[1.1]     | Hernia<br>[0.67] | Vit A<br>[0.98]     | Urticaria<br>[0.67] | Epilepsy<br>[0.93]  |
| Manchester            | Neonatal<br>[1.33] | Congenital<br>[1.18] | Diarrhea<br>[1.71] | URI<br>[1.22]      | ASD<br>[1.13]      | Iron<br>[3.75]   | Hernia<br>[0.54] | Vit A<br>[1.46]     | Urticaria<br>[0.75] | Falls<br>[0.81]     |
| Oldham                | Neonatal<br>[0.8]  | Congenital<br>[1.02] | Diarrhea<br>[1.14] | URI<br>[1.2]       | Iron<br>[1.87]     | ASD<br>[1.07]    | Hernia<br>[0.76] | Urticaria<br>[0.57] | Vit A<br>[0.41]     | Epilepsy<br>[0.71]  |
| Rochdale              | Neonatal<br>[0.82] | Congenital<br>[1.01] | Iron<br>[2.75]     | Diarrhea<br>[1.15] | URI<br>[1.2]       | ASD<br>[1.07]    | Hernia<br>[0.73] | Vit A<br>[0.59]     | Urticaria<br>[0.57] | Epilepsy<br>[0.73]  |
| Salford               | Neonatal<br>[1.24] | Congenital<br>[1.08] | Diarrhea<br>[1.3]  | URI<br>[1.21]      | ASD<br>[1.09]      | Iron<br>[2.53]   | Hernia<br>[0.71] | Urticaria<br>[0.64] | Epilepsy<br>[0.87]  | Falls<br>[0.91]     |
| Sefton                | Neonatal<br>[1.06] | Congenital<br>[1.1]  | Diarrhea<br>[1.15] | URI<br>[1.2]       | Iron<br>[2.58]     | ASD<br>[1.08]    | Hernia<br>[0.81] | Urticaria<br>[0.59] | Epilepsy<br>[0.74]  | Falls<br>[1.03]     |
| St Helens             | Neonatal<br>[1.07] | Congenital<br>[1.09] | Diarrhea<br>[1.17] | URI<br>[1.2]       | ASD<br>[1.07]      | Iron<br>[1.57]   | Hernia<br>[0.81] | Urticaria<br>[0.59] | Epilepsy<br>[0.75]  | Falls<br>[1.03]     |
| Stockport             | Neonatal<br>[0.96] | Congenital<br>[1.08] | Diarrhea<br>[1.52] | URI<br>[1.2]       | Iron<br>[3.42]     | ASD<br>[1.1]     | Hernia<br>[0.69] | Urticaria<br>[0.65] | Falls<br>[0.92]     | Epilepsy<br>[0.86]  |
| Tameside              | Neonatal<br>[0.86] | Congenital<br>[1.02] | Diarrhea<br>[1.19] | URI<br>[1.2]       | Iron<br>[1.49]     | ASD<br>[1.07]    | Hernia<br>[0.77] | Vit A<br>[0.57]     | Urticaria<br>[0.58] | Epilepsy<br>[0.71]  |
| Trafford              | Neonatal<br>[1.29] | Congenital<br>[1.13] | Diarrhea<br>[1.5]  | URI<br>[1.22]      | Iron<br>[4.88]     | ASD<br>[1.13]    | Hernia<br>[0.51] | Urticaria<br>[0.72] | Epilepsy<br>[0.94]  | Falls<br>[0.79]     |
| Warrington            | Neonatal<br>[1.34] | Congenital<br>[1.11] | Diarrhea<br>[1.48] | URI<br>[1.21]      | ASD<br>[1.11]      | Iron<br>[3.27]   | Hernia<br>[0.59] | Urticaria<br>[0.69] | Epilepsy<br>[0.94]  | Falls<br>[0.83]     |
| Wigan                 | Neonatal<br>[1.05] | Congenital<br>[1.02] | Diarrhea<br>[1.09] | URI<br>[1.2]       | ASD<br>[1.08]      | Iron<br>[1.38]   | Hernia<br>[0.8]  | Urticaria<br>[0.58] | Epilepsy<br>[0.7]   | Falls<br>[1.06]     |
| Wirral                | Neonatal<br>[1.18] | Congenital<br>[1.1]  | Diarrhea<br>[1.21] | URI<br>[1.2]       | Iron<br>[2.15]     | ASD<br>[1.07]    | Hernia<br>[0.89] | Urticaria<br>[0.59] | Epilepsy<br>[0.73]  | Falls<br>[1.04]     |
| SE England            | Neonatal<br>[1.07] | Congenital<br>[1.03] | Diarrhea<br>[1.33] | URI<br>[1.21]      | ASD<br>[1.19]      | Iron<br>[2.77]   | Hernia<br>[0.65] | Urticaria<br>[0.67] | Epilepsy<br>[0.94]  | Falls<br>[0.85]     |
| Bracknell Forest      | Neonatal<br>[0.89] | Congenital<br>[1.05] | URI<br>[1.22]      | Diarrhea<br>[1.2]  | ASD<br>[1.13]      | Iron<br>[2.7]    | Hernia<br>[0.52] | Urticaria<br>[0.71] | Vit A<br>[0.99]     | Falls<br>[0.8]      |
| Brighton & Hove       | Neonatal<br>[1.22] | Congenital<br>[1.11] | Diarrhea<br>[1.39] | URI<br>[1.23]      | ASD<br>[1.14]      | Hernia<br>[0.5]  | Iron<br>[2.33]   | Urticaria<br>[0.75] | Epilepsy<br>[1.0]   | Falls<br>[0.78]     |
| Buckinghamshire       | Neonatal<br>[1.35] | Congenital<br>[1.05] | Diarrhea<br>[1.46] | URI<br>[1.22]      | Epilepsy<br>[2.46] | ASD<br>[1.12]    | Hernia<br>[0.66] | Iron<br>[2.51]      | Urticaria<br>[0.7]  | Oth Neuro<br>[3.46] |
| E Sussex              | Neonatal<br>[1.04] | Congenital<br>[0.97] | Diarrhea<br>[1.18] | URI<br>[1.2]       | Iron<br>[2.33]     | ASD<br>[1.15]    | Hernia<br>[0.77] | Urticaria<br>[0.6]  | Epilepsy<br>[0.73]  | Falls<br>[0.99]     |
| Hampshire             | Neonatal<br>[1.02] | Congenital<br>[1.01] | Diarrhea<br>[1.38] | URI<br>[1.21]      | ASD<br>[1.11]      | Iron<br>[2.95]   | Hernia<br>[0.7]  | Urticaria<br>[0.67] | Falls<br>[0.87]     | Epilepsy<br>[0.83]  |
| Isle of Wight         | Neonatal<br>[0.93] | Congenital<br>[0.96] | Diarrhea<br>[1.08] | URI<br>[1.2]       | ASD<br>[1.08]      | Hernia<br>[0.71] | Iron<br>[1.26]   | Urticaria<br>[0.6]  | Epilepsy<br>[0.73]  | Falls<br>[0.99]     |

**eFigure 9b. Leading ten causes of YLDs with the ratio of observed YLDs to YLDs expected on the basis of Socio-Demographic Index alone in 2017, <1 years, both sexes combined.**  
The top ten causes contributing to YLDs are listed globally, by socio-demographic quintile, and then by GBD superregion, region, country, and subnationally where modeled. For each cell, the ratio of observed YLDs to YLDs expected on the basis of socio-demographic index (SDI) alone are listed. Abbreviations: YLD=year of life lived with disability, GBD=Global Burden of Disease.

Values shown in brackets represent the ratio of observed YLDs to predicted YLDs on the basis of Socio-Demographic Index (SDI), rounded to two (2) digits. Color ranges (shown below) were calculated to place a roughly equal number of cells into each bin.

| COLOR KEY:           |                    | [0.0-0.68]           | [0.68-0.82]        | [0.82-0.91]        | [0.91-1.01]    | [1.01-1.1]       | [1.1-1.21]       | [1.21-1.45]         | [1.45-2.25]         | 2.25+              |
|----------------------|--------------------|----------------------|--------------------|--------------------|----------------|------------------|------------------|---------------------|---------------------|--------------------|
|                      | 1                  | 2                    | 3                  | 4                  | 5              | 6                | 7                | 8                   | 9                   | 10                 |
| Kent                 | Neonatal<br>[0.98] | Congenital<br>[0.99] | Diarrhea<br>[1.22] | URI<br>[1.2]       | ASD<br>[1.52]  | Iron<br>[2.46]   | Hernia<br>[0.72] | Urticaria<br>[0.62] | Falls<br>[0.93]     | Epilepsy<br>[0.77] |
| Medway               | Neonatal<br>[1.0]  | Congenital<br>[0.96] | Diarrhea<br>[1.14] | URI<br>[1.2]       | Iron<br>[2.25] | ASD<br>[1.08]    | Hernia<br>[0.86] | Urticaria<br>[0.59] | Vit A<br>[0.57]     | Epilepsy<br>[0.76] |
| Milton Keynes        | Neonatal<br>[0.95] | Congenital<br>[1.04] | Diarrhea<br>[1.48] | URI<br>[1.22]      | ASD<br>[1.11]  | Iron<br>[3.17]   | Hernia<br>[0.64] | Urticaria<br>[0.68] | Falls<br>[0.87]     | Vit A<br>[0.89]    |
| Oxfordshire          | Neonatal<br>[1.04] | Congenital<br>[1.07] | Diarrhea<br>[1.42] | URI<br>[1.23]      | ASD<br>[1.14]  | Hernia<br>[0.56] | Iron<br>[2.71]   | Urticaria<br>[0.74] | Epilepsy<br>[0.99]  | Falls<br>[0.78]    |
| Portsmouth           | Neonatal<br>[1.03] | Congenital<br>[1.03] | Diarrhea<br>[1.35] | URI<br>[1.22]      | Iron<br>[4.05] | ASD<br>[1.11]    | Hernia<br>[0.79] | Urticaria<br>[0.68] | Epilepsy<br>[0.91]  | Falls<br>[0.82]    |
| Reading              | Neonatal<br>[1.36] | Congenital<br>[1.12] | Diarrhea<br>[1.51] | URI<br>[1.23]      | Iron<br>[5.64] | ASD<br>[1.16]    | Hernia<br>[0.49] | Urticaria<br>[0.78] | Epilepsy<br>[1.11]  | Vit A<br>[1.29]    |
| Slough               | Neonatal<br>[1.13] | Congenital<br>[1.04] | Diarrhea<br>[1.44] | URI<br>[1.21]      | Iron<br>[3.38] | ASD<br>[1.11]    | Hernia<br>[0.63] | Urticaria<br>[0.68] | Epilepsy<br>[0.93]  | Falls<br>[0.84]    |
| Southampton          | Neonatal<br>[1.02] | Congenital<br>[1.04] | Diarrhea<br>[1.37] | URI<br>[1.21]      | ASD<br>[1.12]  | Iron<br>[2.18]   | Hernia<br>[0.55] | Urticaria<br>[0.69] | Epilepsy<br>[0.93]  | Falls<br>[0.83]    |
| Surrey               | Neonatal<br>[1.22] | Congenital<br>[1.08] | Diarrhea<br>[1.41] | URI<br>[1.23]      | ASD<br>[1.16]  | Hernia<br>[0.6]  | Iron<br>[2.65]   | Urticaria<br>[0.75] | Epilepsy<br>[1.0]   | Falls<br>[0.77]    |
| West Berkshire       | Neonatal<br>[1.01] | Congenital<br>[1.05] | Diarrhea<br>[1.4]  | URI<br>[1.22]      | ASD<br>[1.13]  | Iron<br>[3.3]    | Hernia<br>[0.56] | Urticaria<br>[0.71] | Vit A<br>[1.01]     | Epilepsy<br>[0.94] |
| W Sussex             | Neonatal<br>[1.03] | Congenital<br>[1.01] | Diarrhea<br>[1.26] | URI<br>[1.21]      | ASD<br>[1.11]  | Iron<br>[2.46]   | Hernia<br>[0.71] | Urticaria<br>[0.65] | Vit A<br>[0.88]     | Falls<br>[0.87]    |
| Windsor & Maidenhead | Neonatal<br>[1.09] | Congenital<br>[1.1]  | Diarrhea<br>[1.55] | URI<br>[1.23]      | ASD<br>[1.16]  | Hernia<br>[0.48] | Iron<br>[2.67]   | Urticaria<br>[0.76] | Epilepsy<br>[1.0]   | Falls<br>[0.76]    |
| Wokingham            | Neonatal<br>[1.11] | Congenital<br>[1.09] | Diarrhea<br>[1.51] | URI<br>[1.23]      | ASD<br>[1.17]  | Hernia<br>[0.5]  | Iron<br>[2.6]    | Urticaria<br>[0.75] | Other MN<br>[4.4]   | Falls<br>[0.77]    |
| SW England           | Neonatal<br>[1.08] | Congenital<br>[0.95] | Diarrhea<br>[1.25] | URI<br>[1.2]       | Iron<br>[3.59] | ASD<br>[1.14]    | Hernia<br>[0.76] | Urticaria<br>[0.64] | Vit A<br>[0.84]     | Epilepsy<br>[0.82] |
| Bath & NE Somerset   | Neonatal<br>[1.51] | Congenital<br>[1.0]  | Diarrhea<br>[1.53] | URI<br>[1.22]      | ASD<br>[1.34]  | Iron<br>[4.22]   | Hernia<br>[0.57] | Urticaria<br>[0.72] | Epilepsy<br>[0.94]  | Falls<br>[0.78]    |
| Bournemouth          | Neonatal<br>[1.1]  | Congenital<br>[0.98] | Diarrhea<br>[1.35] | URI<br>[1.22]      | Iron<br>[4.25] | ASD<br>[1.11]    | Hernia<br>[0.68] | Vit A<br>[1.27]     | Urticaria<br>[0.69] | Epilepsy<br>[0.89] |
| Bristol              | Neonatal<br>[1.34] | Congenital<br>[1.04] | Diarrhea<br>[1.39] | URI<br>[1.23]      | ASD<br>[1.34]  | Iron<br>[4.71]   | Hernia<br>[0.57] | Urticaria<br>[0.75] | Epilepsy<br>[1.04]  | Falls<br>[0.75]    |
| Cornwall             | Neonatal<br>[1.03] | Congenital<br>[0.92] | Diarrhea<br>[1.17] | Iron<br>[3.05]     | URI<br>[1.2]   | ASD<br>[1.08]    | Hernia<br>[0.84] | Vit A<br>[0.75]     | Urticaria<br>[0.6]  | Epilepsy<br>[0.75] |
| Devon                | Neonatal<br>[0.96] | Congenital<br>[0.94] | Diarrhea<br>[1.28] | URI<br>[1.2]       | Iron<br>[2.48] | ASD<br>[1.09]    | Hernia<br>[0.81] | Urticaria<br>[0.63] | Epilepsy<br>[0.81]  | Falls<br>[0.93]    |
| Dorset               | Neonatal<br>[1.01] | Congenital<br>[0.93] | Diarrhea<br>[1.19] | URI<br>[1.2]       | Iron<br>[3.3]  | ASD<br>[1.09]    | Hernia<br>[0.79] | Urticaria<br>[0.62] | Vit A<br>[0.64]     | Epilepsy<br>[0.77] |
| Gloucestershire      | Neonatal<br>[1.0]  | Congenital<br>[0.96] | Iron<br>[5.89]     | Diarrhea<br>[1.38] | URI<br>[1.21]  | ASD<br>[1.1]     | Hernia<br>[0.85] | Urticaria<br>[0.66] | Epilepsy<br>[0.84]  | Falls<br>[0.86]    |
| N Somerset           | Neonatal<br>[1.13] | Congenital<br>[0.94] | Diarrhea<br>[1.08] | URI<br>[1.2]       | ASD<br>[1.29]  | Iron<br>[2.11]   | Vit A<br>[1.21]  | Hernia<br>[0.68]    | Urticaria<br>[0.62] | Epilepsy<br>[0.78] |
| Plymouth             | Neonatal<br>[1.05] | Congenital<br>[0.95] | Diarrhea<br>[1.24] | URI<br>[1.2]       | Iron<br>[3.2]  | Hernia<br>[0.97] | ASD<br>[1.09]    | Vit A<br>[0.89]     | Urticaria<br>[0.63] | Epilepsy<br>[0.82] |
| Poole                | Neonatal<br>[1.05] | Congenital<br>[0.95] | Iron<br>[4.84]     | Diarrhea<br>[1.2]  | URI<br>[1.2]   | ASD<br>[1.1]     | Hernia<br>[0.78] | Vit A<br>[0.99]     | Urticaria<br>[0.64] | Epilepsy<br>[0.81] |
| Somerset             | Neonatal<br>[1.07] | Congenital<br>[0.91] | Diarrhea<br>[1.16] | Iron<br>[3.05]     | URI<br>[1.2]   | ASD<br>[1.08]    | Hernia<br>[0.93] | Urticaria<br>[0.6]  | Vit A<br>[0.64]     | Falls<br>[1.0]     |
| S Gloucestershire    | Neonatal<br>[1.17] | Congenital<br>[0.98] | Diarrhea<br>[1.27] | URI<br>[1.21]      | ASD<br>[1.32]  | Iron<br>[3.78]   | Vit A<br>[1.72]  | Hernia<br>[0.61]    | Urticaria<br>[0.7]  | Falls<br>[0.81]    |
| Swindon              | Neonatal<br>[0.81] | Congenital<br>[0.95] | Diarrhea<br>[1.25] | URI<br>[1.21]      | ASD<br>[1.1]   | Iron<br>[2.61]   | Hernia<br>[0.69] | Urticaria<br>[0.65] | Vit A<br>[0.79]     | Epilepsy<br>[0.84] |
| Torbay               | Neonatal<br>[0.81] | Congenital<br>[0.9]  | Diarrhea<br>[1.04] | URI<br>[1.2]       | Iron<br>[1.74] | ASD<br>[1.07]    | Vit A<br>[0.78]  | Hernia<br>[0.86]    | Urticaria<br>[0.57] | Falls<br>[1.14]    |
| Wiltshire            | Neonatal<br>[1.19] | Congenital<br>[0.93] | Diarrhea<br>[1.14] | URI<br>[1.2]       | Iron<br>[3.48] | ASD<br>[1.09]    | Hernia<br>[0.7]  | Vit A<br>[0.8]      | Urticaria<br>[0.63] | Epilepsy<br>[0.77] |
| W Midlands           | Neonatal<br>[0.99] | Congenital<br>[0.98] | Diarrhea<br>[1.32] | URI<br>[1.2]       | Iron<br>[2.56] | ASD<br>[1.01]    | Hernia<br>[0.71] | Urticaria<br>[0.62] | Falls<br>[1.01]     | Epilepsy<br>[0.81] |
| Birmingham           | Neonatal<br>[1.0]  | Congenital<br>[1.01] | Diarrhea<br>[1.38] | URI<br>[1.2]       | Iron<br>[3.33] | Hernia<br>[0.71] | ASD<br>[0.8]     | Urticaria<br>[0.64] | Falls<br>[1.03]     | Epilepsy<br>[0.86] |

**eFigure 9b. Leading ten causes of YLDs with the ratio of observed YLDs to YLDs expected on the basis of Socio-Demographic Index alone in 2017, <1 years, both sexes combined.**  
The top ten causes contributing to YLDs are listed globally, by socio-demographic quintile, and then by GBD superregion, region, country, and subnationally where modeled. For each cell, the ratio of observed YLDs to YLDs expected on the basis of socio-demographic index (SDI) alone are listed. Abbreviations: YLD=year of life lived with disability, GBD=Global Burden of Disease.

Values shown in brackets represent the ratio of observed YLDs to predicted YLDs on the basis of Socio-Demographic Index (SDI), rounded to two (2) digits. Color ranges (shown below) were calculated to place a roughly equal number of cells into each bin.

| COLOR KEY:            |                    | [0.0-0.68]           | [0.68-0.82]        | [0.82-0.91]        | [0.91-1.01]      | [1.01-1.1]       | [1.1-1.21]          | [1.21-1.45]         | [1.45-2.25]         | 2.25+              |
|-----------------------|--------------------|----------------------|--------------------|--------------------|------------------|------------------|---------------------|---------------------|---------------------|--------------------|
|                       | 1                  | 2                    | 3                  | 4                  | 5                | 6                | 7                   | 8                   | 9                   | 10                 |
| Coventry              | Neonatal<br>[0.98] | Congenital<br>[1.02] | Diarrhea<br>[1.34] | URI<br>[1.21]      | ASD<br>[1.1]     | Hernia<br>[0.61] | Iron<br>[1.53]      | Urticaria<br>[0.66] | Epilepsy<br>[0.9]   | Falls<br>[0.89]    |
| Dudley                | Neonatal<br>[1.04] | Congenital<br>[0.95] | Diarrhea<br>[1.2]  | URI<br>[1.2]       | ASD<br>[1.07]    | Iron<br>[1.28]   | Hernia<br>[0.79]    | Urticaria<br>[0.58] | Falls<br>[1.12]     | Epilepsy<br>[0.73] |
| Herefordshire         | Neonatal<br>[1.03] | Congenital<br>[0.98] | Diarrhea<br>[1.33] | URI<br>[1.2]       | ASD<br>[1.09]    | Iron<br>[2.07]   | Hernia<br>[0.69]    | Urticaria<br>[0.62] | Falls<br>[0.94]     | Epilepsy<br>[0.77] |
| Sandwell              | Neonatal<br>[1.01] | Congenital<br>[0.95] | Diarrhea<br>[1.2]  | URI<br>[1.2]       | ASD<br>[1.07]    | Iron<br>[1.29]   | Hernia<br>[0.8]     | Vit A<br>[0.63]     | Urticaria<br>[0.58] | Epilepsy<br>[0.75] |
| Shropshire            | Neonatal<br>[0.98] | Congenital<br>[0.97] | Diarrhea<br>[1.27] | URI<br>[1.2]       | Iron<br>[2.71]   | ASD<br>[1.09]    | Hernia<br>[0.73]    | Urticaria<br>[0.62] | Epilepsy<br>[0.79]  | Falls<br>[0.94]    |
| Solihull              | Neonatal<br>[0.79] | Congenital<br>[1.01] | Diarrhea<br>[1.36] | URI<br>[1.21]      | ASD<br>[1.11]    | Iron<br>[2.48]   | Hernia<br>[0.61]    | Urticaria<br>[0.67] | Falls<br>[0.91]     | Epilepsy<br>[0.86] |
| Staffordshire         | Neonatal<br>[0.96] | Congenital<br>[0.97] | Diarrhea<br>[1.41] | URI<br>[1.2]       | Iron<br>[3.03]   | ASD<br>[1.03]    | Hernia<br>[0.71]    | Urticaria<br>[0.61] | Vit A<br>[0.71]     | Falls<br>[1.04]    |
| Stoke-on-Trent        | Neonatal<br>[1.12] | Congenital<br>[0.96] | Diarrhea<br>[1.27] | URI<br>[1.2]       | ASD<br>[1.07]    | Iron<br>[1.44]   | Hernia<br>[0.86]    | Vit A<br>[0.69]     | Urticaria<br>[0.58] | Falls<br>[1.21]    |
| Telford & Wrekin      | Neonatal<br>[0.98] | Congenital<br>[0.96] | Diarrhea<br>[1.23] | Iron<br>[3.72]     | URI<br>[1.2]     | ASD<br>[1.08]    | Hernia<br>[0.73]    | Urticaria<br>[0.61] | Epilepsy<br>[0.78]  | Falls<br>[1.0]     |
| Walsall               | Neonatal<br>[0.94] | Congenital<br>[0.95] | Diarrhea<br>[1.07] | Iron<br>[2.3]      | URI<br>[1.21]    | ASD<br>[1.07]    | Hernia<br>[0.76]    | Urticaria<br>[0.57] | Vit A<br>[0.4]      | Falls<br>[1.19]    |
| Warwickshire          | Neonatal<br>[1.04] | Congenital<br>[1.02] | Diarrhea<br>[1.42] | URI<br>[1.21]      | ASD<br>[1.1]     | Iron<br>[2.78]   | Hernia<br>[0.62]    | Urticaria<br>[0.68] | Falls<br>[0.9]      | Epilepsy<br>[0.87] |
| Wolverhampton         | Neonatal<br>[0.75] | Congenital<br>[0.96] | Diarrhea<br>[1.3]  | URI<br>[1.2]       | ASD<br>[1.07]    | Iron<br>[1.7]    | Hernia<br>[0.77]    | Urticaria<br>[0.59] | Falls<br>[1.06]     | Epilepsy<br>[0.75] |
| Worcestershire        | Neonatal<br>[1.11] | Congenital<br>[0.98] | Diarrhea<br>[1.26] | URI<br>[1.2]       | ASD<br>[1.1]     | Iron<br>[2.27]   | Hernia<br>[0.77]    | Urticaria<br>[0.63] | Falls<br>[0.97]     | Epilepsy<br>[0.82] |
| Yorkshire & Humber    | Neonatal<br>[0.94] | Congenital<br>[0.99] | Iron<br>[4.39]     | Diarrhea<br>[1.26] | URI<br>[1.2]     | ASD<br>[1.08]    | Hernia<br>[0.76]    | Urticaria<br>[0.62] | Vit A<br>[0.71]     | Epilepsy<br>[0.77] |
| Barnsley              | Neonatal<br>[0.94] | Congenital<br>[0.94] | Iron<br>[2.93]     | Diarrhea<br>[1.13] | URI<br>[1.2]     | ASD<br>[1.07]    | Hernia<br>[0.9]     | Vit A<br>[0.54]     | Urticaria<br>[0.56] | Epilepsy<br>[0.71] |
| Bradford              | Neonatal<br>[0.98] | Congenital<br>[0.97] | Diarrhea<br>[1.14] | Iron<br>[2.94]     | URI<br>[1.2]     | ASD<br>[1.07]    | Hernia<br>[0.91]    | Urticaria<br>[0.59] | Vit A<br>[0.47]     | Falls<br>[1.02]    |
| Calderdale            | Neonatal<br>[0.9]  | Congenital<br>[0.98] | Diarrhea<br>[1.26] | Iron<br>[3.97]     | URI<br>[1.2]     | ASD<br>[1.08]    | Hernia<br>[0.77]    | Urticaria<br>[0.61] | Vit A<br>[0.64]     | Epilepsy<br>[0.8]  |
| Doncaster             | Neonatal<br>[1.13] | Congenital<br>[0.94] | Diarrhea<br>[1.1]  | Iron<br>[2.03]     | URI<br>[1.2]     | ASD<br>[1.07]    | Hernia<br>[0.97]    | Vit A<br>[0.51]     | Urticaria<br>[0.57] | Epilepsy<br>[0.69] |
| E Riding of Yorkshire | Neonatal<br>[0.9]  | Congenital<br>[0.96] | Iron<br>[4.35]     | Diarrhea<br>[1.16] | URI<br>[1.2]     | ASD<br>[1.09]    | Hernia<br>[0.87]    | Vit A<br>[0.7]      | Urticaria<br>[0.61] | Epilepsy<br>[0.75] |
| Kingston upon Hull    | Neonatal<br>[0.84] | Congenital<br>[0.97] | Iron<br>[4.6]      | Diarrhea<br>[1.15] | URI<br>[1.2]     | ASD<br>[1.07]    | Hernia<br>[0.75]    | Vit A<br>[0.7]      | Urticaria<br>[0.6]  | Epilepsy<br>[0.77] |
| Kirklees              | Neonatal<br>[0.86] | Congenital<br>[0.97] | Diarrhea<br>[1.22] | Iron<br>[3.31]     | URI<br>[1.2]     | ASD<br>[1.07]    | Hernia<br>[0.78]    | Urticaria<br>[0.6]  | Epilepsy<br>[0.74]  | Falls<br>[0.98]    |
| Leeds                 | Neonatal<br>[0.93] | Congenital<br>[1.05] | Iron<br>[8.34]     | Diarrhea<br>[1.41] | URI<br>[1.22]    | ASD<br>[1.12]    | Hernia<br>[0.61]    | Urticaria<br>[0.71] | Epilepsy<br>[0.94]  | Falls<br>[0.8]     |
| NE Lincolnshire       | Neonatal<br>[0.87] | Congenital<br>[0.95] | Iron<br>[3.58]     | Diarrhea<br>[1.01] | URI<br>[1.2]     | ASD<br>[1.07]    | Hernia<br>[0.69]    | Vit A<br>[0.64]     | Urticaria<br>[0.59] | Epilepsy<br>[0.72] |
| N Lincolnshire        | Neonatal<br>[0.82] | Congenital<br>[0.96] | Iron<br>[3.44]     | Diarrhea<br>[1.14] | URI<br>[1.2]     | ASD<br>[1.07]    | Hernia<br>[0.72]    | Urticaria<br>[0.59] | Vit A<br>[0.54]     | Epilepsy<br>[0.76] |
| N Yorkshire           | Neonatal<br>[1.06] | Congenital<br>[0.99] | Diarrhea<br>[1.37] | Iron<br>[4.11]     | URI<br>[1.2]     | ASD<br>[1.09]    | Hernia<br>[0.81]    | Urticaria<br>[0.64] | Vit A<br>[0.76]     | Falls<br>[0.89]    |
| Rotherham             | Neonatal<br>[0.82] | Congenital<br>[0.95] | Iron<br>[2.76]     | Diarrhea<br>[1.06] | URI<br>[1.2]     | ASD<br>[1.07]    | Hernia<br>[0.81]    | Vit A<br>[0.56]     | Urticaria<br>[0.57] | Epilepsy<br>[0.71] |
| Sheffield             | Neonatal<br>[1.03] | Congenital<br>[1.02] | Diarrhea<br>[1.41] | Iron<br>[5.06]     | URI<br>[1.21]    | ASD<br>[1.11]    | Hernia<br>[0.73]    | Urticaria<br>[0.67] | Epilepsy<br>[0.9]   | Falls<br>[0.84]    |
| Wakefield             | Neonatal<br>[0.74] | Congenital<br>[0.95] | Diarrhea<br>[1.28] | Iron<br>[3.04]     | URI<br>[1.2]     | ASD<br>[1.07]    | Vit A<br>[1.0]      | Hernia<br>[0.76]    | Urticaria<br>[0.59] | Epilepsy<br>[0.72] |
| York                  | Neonatal<br>[0.96] | Congenital<br>[1.07] | Diarrhea<br>[1.49] | URI<br>[1.22]      | Iron<br>[5.25]   | ASD<br>[1.13]    | Hernia<br>[0.76]    | Urticaria<br>[0.73] | Epilepsy<br>[0.95]  | Falls<br>[0.76]    |
| N Ireland             | Neonatal<br>[0.91] | Congenital<br>[1.01] | Diarrhea<br>[1.06] | URI<br>[1.17]      | Hernia<br>[1.19] | ASD<br>[1.02]    | Urticaria<br>[0.63] | Epilepsy<br>[0.86]  | Falls<br>[0.91]     | Otitis<br>[1.25]   |
| Scotland              | Neonatal<br>[0.83] | Congenital<br>[1.21] | URI<br>[1.16]      | Diarrhea<br>[0.87] | Hernia<br>[1.28] | Iron<br>[1.88]   | ASD<br>[1.02]       | Vit A<br>[0.94]     | Urticaria<br>[0.59] | Epilepsy<br>[0.86] |

**eFigure 9b. Leading ten causes of YLDs with the ratio of observed YLDs to YLDs expected on the basis of Socio-Demographic Index alone in 2017, <1 years, both sexes combined.**  
The top ten causes contributing to YLDs are listed globally, by socio-demographic quintile, and then by GBD superregion, region, country, and subnationally where modeled. For each cell, the ratio of observed YLDs to YLDs expected on the basis of socio-demographic index (SDI) alone are listed. Abbreviations: YLD=year of life lived with disability, GBD=Global Burden of Disease.

Values shown in brackets represent the ratio of observed YLDs to predicted YLDs on the basis of Socio-Demographic Index (SDI), rounded to two (2) digits. Color ranges (shown below) were calculated to place a roughly equal number of cells into each bin.

| COLOR KEY:                  |                    | [0.0-0.68]           | [0.68-0.82]          | [0.82-0.91]          | [0.91-1.01]          | [1.01-1.1]          | [1.1-1.21]          | [1.21-1.45]         | [1.45-2.25]         | 2.25+                |
|-----------------------------|--------------------|----------------------|----------------------|----------------------|----------------------|---------------------|---------------------|---------------------|---------------------|----------------------|
|                             | 1                  | 2                    | 3                    | 4                    | 5                    | 6                   | 7                   | 8                   | 9                   | 10                   |
| Wales                       | Neonatal<br>[0.82] | Congenital<br>[0.95] | URI<br>[1.17]        | Diarrhea<br>[0.93]   | Iron<br>[2.19]       | Hernia<br>[1.32]    | ASD<br>[0.96]       | Vit A<br>[0.9]      | Urticaria<br>[0.59] | Epilepsy<br>[0.71]   |
| Latin America and Caribbean | Neonatal<br>[1.19] | Diarrhea<br>[1.54]   | Iron<br>[1.13]       | Vit A<br>[0.82]      | Congenital<br>[0.75] | Epilepsy<br>[1.53]  | URI<br>[0.9]        | Urticaria<br>[0.87] | ASD<br>[0.82]       | Oth Neuro<br>[2.16]  |
| Andean Latin America        | Iron<br>[2.87]     | Neonatal<br>[1.15]   | Vit A<br>[1.01]      | Diarrhea<br>[1.26]   | Congenital<br>[0.72] | URI<br>[1.0]        | Urticaria<br>[0.85] | Epilepsy<br>[1.02]  | Oth NTD<br>[11.48]  | ASD<br>[0.81]        |
| Bolivia                     | Iron<br>[2.91]     | Neonatal<br>[1.14]   | Diarrhea<br>[1.23]   | Vit A<br>[0.73]      | Congenital<br>[0.77] | Oth NTD<br>[3.83]   | URI<br>[0.9]        | Urticaria<br>[0.85] | Epilepsy<br>[0.93]  | Oth Un Inf<br>[2.83] |
| Ecuador                     | Neonatal<br>[1.16] | Diarrhea<br>[0.97]   | Congenital<br>[0.71] | Vit A<br>[0.5]       | URI<br>[0.96]        | Epilepsy<br>[1.11]  | Urticaria<br>[0.86] | ASD<br>[0.82]       | Oth Neuro<br>[1.58] | Hernia<br>[0.82]     |
| Peru                        | Iron<br>[3.82]     | Neonatal<br>[1.15]   | Vit A<br>[1.29]      | Diarrhea<br>[1.35]   | Congenital<br>[0.72] | URI<br>[1.07]       | Oth NTD<br>[18.57]  | Urticaria<br>[0.85] | Epilepsy<br>[1.0]   | Oth Un Inf<br>[3.86] |
| Caribbean                   | Iron<br>[2.46]     | Neonatal<br>[0.99]   | Vit A<br>[1.17]      | Diarrhea<br>[1.29]   | Congenital<br>[0.77] | URI<br>[0.94]       | Urticaria<br>[0.85] | Epilepsy<br>[0.9]   | PEM<br>[3.25]       | Hemog<br>[2.13]      |
| Antigua                     | Neonatal<br>[0.94] | Iron<br>[2.21]       | Congenital<br>[0.66] | Diarrhea<br>[0.79]   | Vit A<br>[0.52]      | URI<br>[0.89]       | Urticaria<br>[0.92] | Epilepsy<br>[1.02]  | ASD<br>[0.75]       | Scabies<br>[2.63]    |
| Bahamas                     | Neonatal<br>[1.05] | Congenital<br>[0.68] | Vit A<br>[1.13]      | Iron<br>[1.32]       | Diarrhea<br>[0.83]   | URI<br>[0.87]       | Urticaria<br>[0.97] | Epilepsy<br>[1.23]  | ASD<br>[0.73]       | Hemog<br>[3.93]      |
| Barbados                    | Neonatal<br>[1.08] | Congenital<br>[0.66] | Iron<br>[1.45]       | Diarrhea<br>[0.84]   | Vit A<br>[0.78]      | URI<br>[0.88]       | Urticaria<br>[0.95] | Epilepsy<br>[1.12]  | ASD<br>[0.74]       | Scabies<br>[2.97]    |
| Belize                      | Neonatal<br>[0.91] | Iron<br>[1.04]       | Congenital<br>[0.72] | Diarrhea<br>[0.58]   | Vit A<br>[0.36]      | URI<br>[0.98]       | Urticaria<br>[0.85] | Epilepsy<br>[0.9]   | ASD<br>[0.84]       | PEM<br>[1.39]        |
| Bermuda                     | Neonatal<br>[1.07] | Congenital<br>[0.66] | Iron<br>[3.33]       | Diarrhea<br>[0.92]   | URI<br>[0.86]        | Urticaria<br>[1.06] | Epilepsy<br>[1.37]  | Vit A<br>[0.88]     | ASD<br>[0.73]       | Scabies<br>[5.15]    |
| Cuba                        | Neonatal<br>[0.83] | Iron<br>[1.09]       | Congenital<br>[0.65] | URI<br>[0.91]        | Diarrhea<br>[0.42]   | Urticaria<br>[0.89] | ASD<br>[0.77]       | Vit A<br>[0.25]     | Epilepsy<br>[0.72]  | Scabies<br>[2.16]    |
| Dominica                    | Neonatal<br>[1.16] | Iron<br>[1.06]       | Congenital<br>[0.7]  | Diarrhea<br>[0.83]   | URI<br>[0.91]        | Vit A<br>[0.35]     | Epilepsy<br>[1.27]  | Urticaria<br>[0.89] | ASD<br>[0.77]       | Oth Neuro<br>[1.79]  |
| Dominican Rep               | Neonatal<br>[0.95] | Iron<br>[1.25]       | Diarrhea<br>[1.18]   | Congenital<br>[0.74] | Vit A<br>[0.47]      | URI<br>[0.84]       | Urticaria<br>[0.85] | Epilepsy<br>[0.81]  | ASD<br>[0.84]       | Scabies<br>[1.43]    |
| Grenada                     | Iron<br>[2.46]     | Neonatal<br>[0.98]   | Congenital<br>[0.68] | Vit A<br>[0.54]      | Diarrhea<br>[0.68]   | URI<br>[0.94]       | Urticaria<br>[0.86] | Epilepsy<br>[0.97]  | ASD<br>[0.8]        | Oth NTD<br>[14.43]   |
| Guyana                      | Iron<br>[1.73]     | Neonatal<br>[0.95]   | Vit A<br>[0.57]      | Congenital<br>[0.72] | Diarrhea<br>[0.65]   | PEM<br>[3.27]       | URI<br>[0.95]       | Urticaria<br>[0.85] | Epilepsy<br>[0.87]  | ASD<br>[0.85]        |
| Haiti                       | Iron<br>[1.88]     | Vit A<br>[0.89]      | Neonatal<br>[0.86]   | Diarrhea<br>[1.22]   | Congenital<br>[0.87] | PEM<br>[0.75]       | Hemog<br>[1.61]     | URI<br>[1.13]       | Oth NTD<br>[1.44]   | Urticaria<br>[0.91]  |
| Jamaica                     | Neonatal<br>[1.08] | Iron<br>[1.68]       | Congenital<br>[0.68] | Diarrhea<br>[0.57]   | Vit A<br>[0.41]      | URI<br>[0.92]       | Epilepsy<br>[1.28]  | Urticaria<br>[0.88] | ASD<br>[0.77]       | Oth Neuro<br>[1.81]  |
| Puerto Rico                 | Neonatal<br>[1.13] | Congenital<br>[0.71] | Diarrhea<br>[1.04]   | URI<br>[0.85]        | Iron<br>[1.94]       | Urticaria<br>[1.08] | Epilepsy<br>[1.36]  | ASD<br>[0.73]       | Scabies<br>[5.44]   | Vit A<br>[0.46]      |
| St Lucia                    | Neonatal<br>[1.0]  | Iron<br>[0.97]       | Diarrhea<br>[0.9]    | Congenital<br>[0.67] | Vit A<br>[0.48]      | URI<br>[0.93]       | Urticaria<br>[0.87] | Epilepsy<br>[0.94]  | ASD<br>[0.79]       | Scabies<br>[1.74]    |
| St Vincent                  | Neonatal<br>[0.92] | Vit A<br>[0.62]      | Congenital<br>[0.69] | Iron<br>[0.62]       | Diarrhea<br>[0.63]   | URI<br>[0.96]       | Urticaria<br>[0.85] | Epilepsy<br>[0.88]  | ASD<br>[0.83]       | Hemog<br>[1.11]      |
| Suriname                    | Neonatal<br>[1.04] | Iron<br>[1.17]       | Congenital<br>[0.72] | Diarrhea<br>[0.76]   | Vit A<br>[0.36]      | URI<br>[0.94]       | Urticaria<br>[0.86] | Epilepsy<br>[1.02]  | ASD<br>[0.8]        | Scabies<br>[1.67]    |
| Trinidad Tobago             | Neonatal<br>[1.04] | Congenital<br>[0.67] | Diarrhea<br>[0.58]   | Iron<br>[0.63]       | URI<br>[0.91]        | Urticaria<br>[0.91] | Epilepsy<br>[1.04]  | Vit A<br>[0.28]     | ASD<br>[0.76]       | Whooping<br>[2.2]    |
| Virgin Isl US               | Neonatal<br>[1.09] | Iron<br>[3.88]       | Congenital<br>[0.66] | Diarrhea<br>[1.09]   | URI<br>[0.85]        | Urticaria<br>[1.06] | Vit A<br>[0.98]     | Epilepsy<br>[1.44]  | ASD<br>[0.72]       | Whooping<br>[2.67]   |
| Central Latin America       | Neonatal<br>[1.38] | Diarrhea<br>[1.97]   | Congenital<br>[0.73] | Vit A<br>[0.59]      | Iron<br>[0.59]       | Epilepsy<br>[1.96]  | URI<br>[0.9]        | Urticaria<br>[0.86] | Oth Neuro<br>[2.76] | ASD<br>[0.85]        |
| Colombia                    | Neonatal<br>[1.43] | Diarrhea<br>[2.05]   | Iron<br>[0.84]       | Congenital<br>[0.74] | Vit A<br>[0.45]      | Epilepsy<br>[1.98]  | URI<br>[1.07]       | Urticaria<br>[0.86] | Oth Neuro<br>[2.79] | ASD<br>[0.82]        |
| Costa Rica                  | Neonatal<br>[1.3]  | Diarrhea<br>[1.94]   | Congenital<br>[0.67] | Epilepsy<br>[1.79]   | URI<br>[0.84]        | Vit A<br>[0.3]      | Urticaria<br>[0.87] | ASD<br>[0.8]        | Oth Neuro<br>[2.52] | LRI<br>[1.48]        |
| El Salvador                 | Neonatal<br>[1.33] | Diarrhea<br>[2.08]   | Iron<br>[1.1]        | Vit A<br>[0.86]      | Congenital<br>[0.77] | Epilepsy<br>[1.51]  | URI<br>[0.88]       | Urticaria<br>[0.85] | ASD<br>[0.85]       | Oth Neuro<br>[2.13]  |
| Guatemala                   | Neonatal<br>[1.22] | Diarrhea<br>[2.17]   | Iron<br>[1.41]       | Congenital<br>[0.79] | Vit A<br>[0.39]      | Epilepsy<br>[1.06]  | Urticaria<br>[0.88] | URI<br>[0.81]       | ASD<br>[0.89]       | Oth NTD<br>[1.34]    |
| Honduras                    | Neonatal<br>[1.32] | Diarrhea<br>[2.3]    | Iron<br>[1.29]       | Congenital<br>[0.77] | Vit A<br>[0.34]      | Epilepsy<br>[1.69]  | URI<br>[0.93]       | Urticaria<br>[0.88] | Oth Neuro<br>[2.38] | ASD<br>[0.91]        |

**eFigure 9b. Leading ten causes of YLDs with the ratio of observed YLDs to YLDs expected on the basis of Socio-Demographic Index alone in 2017, <1 years, both sexes combined.**  
The top ten causes contributing to YLDs are listed globally, by socio-demographic quintile, and then by GBD superregion, region, country, and subnationally where modeled. For each cell, the ratio of observed YLDs to YLDs expected on the basis of socio-demographic index (SDI) alone are listed. Abbreviations: YLD=year of life lived with disability, GBD=Global Burden of Disease.

Values shown in brackets represent the ratio of observed YLDs to predicted YLDs on the basis of Socio-Demographic Index (SDI), rounded to two (2) digits. Color ranges (shown below) were calculated to place a roughly equal number of cells into each bin.

| COLOR KEY:      |                    | [0.0-0.68]         | [0.68-0.82]          | [0.82-0.91]          | [0.91-1.01]        | [1.01-1.1]          | [1.1-1.21]          | [1.21-1.45]         | [1.45-2.25]         | 2.25+               |
|-----------------|--------------------|--------------------|----------------------|----------------------|--------------------|---------------------|---------------------|---------------------|---------------------|---------------------|
|                 | 1                  | 2                  | 3                    | 4                    | 5                  | 6                   | 7                   | 8                   | 9                   | 10                  |
| Mexico          | Neonatal<br>[1.39] | Diarrhea<br>[1.36] | Vit A<br>[0.74]      | Congenital<br>[0.72] | Epilepsy<br>[2.25] | URI<br>[0.88]       | Urticaria<br>[0.87] | Oth Neuro<br>[3.17] | ASD<br>[0.89]       | Iron<br>[0.15]      |
| Aguascalientes  | Neonatal<br>[1.43] | Diarrhea<br>[1.57] | Vit A<br>[1.0]       | Congenital<br>[0.78] | Epilepsy<br>[2.45] | URI<br>[0.87]       | Urticaria<br>[0.89] | Oth Neuro<br>[3.46] | ASD<br>[0.83]       | Iron<br>[0.18]      |
| Baja CA         | Neonatal<br>[1.36] | Vit A<br>[0.86]    | Diarrhea<br>[1.08]   | Congenital<br>[0.74] | Epilepsy<br>[2.35] | URI<br>[0.86]       | Urticaria<br>[0.89] | Oth Neuro<br>[3.31] | ASD<br>[0.84]       | Iron<br>[0.2]       |
| Baja CA Sur     | Neonatal<br>[1.46] | Diarrhea<br>[1.51] | Vit A<br>[0.74]      | Congenital<br>[0.69] | Epilepsy<br>[2.37] | URI<br>[0.86]       | Urticaria<br>[0.89] | Oth Neuro<br>[3.33] | ASD<br>[0.84]       | Whooping<br>[1.42]  |
| Campeche        | Neonatal<br>[1.45] | Diarrhea<br>[1.51] | Vit A<br>[0.62]      | Congenital<br>[0.73] | Epilepsy<br>[2.05] | URI<br>[0.89]       | Urticaria<br>[0.87] | Oth Neuro<br>[2.88] | ASD<br>[0.87]       | Iron<br>[0.18]      |
| Chiapas         | Neonatal<br>[1.3]  | Diarrhea<br>[1.4]  | Vit A<br>[0.63]      | Congenital<br>[0.72] | Epilepsy<br>[2.04] | URI<br>[0.93]       | Urticaria<br>[0.9]  | Oth Neuro<br>[2.87] | ASD<br>[0.94]       | PEM<br>[0.4]        |
| Chihuahua       | Neonatal<br>[1.32] | Diarrhea<br>[1.64] | Congenital<br>[0.78] | Epilepsy<br>[2.38]   | Vit A<br>[0.51]    | URI<br>[0.87]       | Urticaria<br>[0.88] | Oth Neuro<br>[3.35] | ASD<br>[0.85]       | Iron<br>[0.15]      |
| Coahuila        | Neonatal<br>[1.21] | Diarrhea<br>[1.84] | Congenital<br>[0.7]  | Epilepsy<br>[2.33]   | Vit A<br>[0.4]     | URI<br>[0.87]       | Urticaria<br>[0.88] | Oth Neuro<br>[3.28] | ASD<br>[0.84]       | Whooping<br>[1.33]  |
| Colima          | Neonatal<br>[1.51] | Vit A<br>[1.18]    | Diarrhea<br>[1.29]   | Congenital<br>[0.7]  | Epilepsy<br>[2.36] | PEM<br>[7.75]       | Iron<br>[0.39]      | URI<br>[0.87]       | Urticaria<br>[0.88] | Oth Neuro<br>[3.33] |
| Mexico City     | Neonatal<br>[1.58] | Diarrhea<br>[1.58] | Vit A<br>[1.33]      | Congenital<br>[0.76] | Epilepsy<br>[3.03] | URI<br>[0.83]       | Oth Neuro<br>[4.27] | Urticaria<br>[0.94] | ASD<br>[0.79]       | Whooping<br>[2.23]  |
| Durango         | Neonatal<br>[1.26] | Diarrhea<br>[1.34] | Vit A<br>[0.66]      | Congenital<br>[0.74] | Epilepsy<br>[2.21] | Iron<br>[0.33]      | URI<br>[0.89]       | Urticaria<br>[0.87] | Oth Neuro<br>[3.11] | ASD<br>[0.86]       |
| Guanajuato      | Neonatal<br>[1.24] | Vit A<br>[0.99]    | Diarrhea<br>[1.19]   | Congenital<br>[0.75] | Epilepsy<br>[2.24] | ASD<br>[1.52]       | URI<br>[0.89]       | Urticaria<br>[0.87] | Oth Neuro<br>[3.15] | Iron<br>[0.19]      |
| Guerrero        | Neonatal<br>[1.4]  | Vit A<br>[0.79]    | Diarrhea<br>[1.11]   | Congenital<br>[0.69] | Epilepsy<br>[1.98] | URI<br>[0.93]       | Urticaria<br>[0.89] | Oth Neuro<br>[2.79] | ASD<br>[0.92]       | Iron<br>[0.11]      |
| Hidalgo         | Neonatal<br>[1.57] | Diarrhea<br>[0.91] | Congenital<br>[0.74] | Epilepsy<br>[2.1]    | Vit A<br>[0.34]    | URI<br>[0.92]       | Urticaria<br>[0.88] | Oth Neuro<br>[2.95] | ASD<br>[0.9]        | Whooping<br>[0.79]  |
| Jalisco         | Neonatal<br>[1.4]  | Diarrhea<br>[1.24] | Congenital<br>[0.75] | Vit A<br>[0.7]       | Epilepsy<br>[2.87] | Oth Neuro<br>[4.04] | URI<br>[0.87]       | Urticaria<br>[0.89] | ASD<br>[0.84]       | Whooping<br>[1.28]  |
| Mexico          | Neonatal<br>[1.61] | Diarrhea<br>[1.39] | Vit A<br>[0.81]      | Congenital<br>[0.64] | Epilepsy<br>[2.26] | URI<br>[0.88]       | Urticaria<br>[0.88] | Oth Neuro<br>[3.18] | ASD<br>[0.85]       | Iron<br>[0.21]      |
| Michoacan       | Neonatal<br>[1.16] | Vit A<br>[0.79]    | Diarrhea<br>[1.02]   | Congenital<br>[0.69] | Epilepsy<br>[2.04] | URI<br>[0.92]       | Urticaria<br>[0.87] | Oth Neuro<br>[2.87] | ASD<br>[0.9]        | Iron<br>[0.16]      |
| Morelos         | Neonatal<br>[1.35] | Diarrhea<br>[1.16] | Congenital<br>[0.76] | Vit A<br>[0.68]      | Epilepsy<br>[2.25] | URI<br>[0.88]       | Urticaria<br>[0.88] | Oth Neuro<br>[3.17] | ASD<br>[0.85]       | Iron<br>[0.09]      |
| Nayarit         | Neonatal<br>[1.47] | Diarrhea<br>[1.37] | Congenital<br>[0.74] | Epilepsy<br>[2.1]    | Vit A<br>[0.38]    | URI<br>[0.89]       | Urticaria<br>[0.87] | Oth Neuro<br>[2.96] | ASD<br>[0.86]       | Whooping<br>[1.01]  |
| Nuevo Leon      | Neonatal<br>[1.19] | Diarrhea<br>[1.39] | Vit A<br>[1.07]      | Congenital<br>[0.7]  | Epilepsy<br>[2.5]  | URI<br>[0.85]       | Urticaria<br>[0.9]  | Oth Neuro<br>[3.53] | Iron<br>[0.35]      | ASD<br>[0.82]       |
| Oaxaca          | Neonatal<br>[1.29] | Diarrhea<br>[1.21] | Congenital<br>[0.75] | Vit A<br>[0.38]      | Epilepsy<br>[2.19] | URI<br>[0.93]       | Urticaria<br>[0.89] | Oth Neuro<br>[3.09] | ASD<br>[0.92]       | LRI<br>[1.15]       |
| Puebla          | Neonatal<br>[1.22] | Diarrhea<br>[1.27] | Congenital<br>[0.73] | Vit A<br>[0.44]      | Epilepsy<br>[1.27] | URI<br>[0.92]       | Urticaria<br>[0.87] | ASD<br>[0.9]        | Iron<br>[0.18]      | Oth Neuro<br>[1.8]  |
| Queretaro       | Neonatal<br>[1.45] | Diarrhea<br>[1.19] | Congenital<br>[0.72] | Epilepsy<br>[2.3]    | Vit A<br>[0.49]    | URI<br>[0.87]       | Urticaria<br>[0.88] | Oth Neuro<br>[3.23] | ASD<br>[0.85]       | Zika<br>[5693.67]   |
| Quintana Roo    | Neonatal<br>[1.7]  | Diarrhea<br>[1.76] | Congenital<br>[0.74] | Vit A<br>[0.53]      | Epilepsy<br>[2.22] | URI<br>[0.88]       | Urticaria<br>[0.87] | Oth Neuro<br>[3.13] | ASD<br>[0.86]       | LRI<br>[1.39]       |
| San Luis Potosi | Neonatal<br>[1.22] | Diarrhea<br>[1.18] | Vit A<br>[0.77]      | Congenital<br>[0.79] | Epilepsy<br>[2.35] | URI<br>[0.89]       | Urticaria<br>[0.87] | Oth Neuro<br>[3.31] | ASD<br>[0.87]       | Iron<br>[0.13]      |
| Sinaloa         | Neonatal<br>[1.3]  | Diarrhea<br>[1.43] | Vit A<br>[0.69]      | Congenital<br>[0.69] | Epilepsy<br>[2.25] | URI<br>[0.87]       | Urticaria<br>[0.88] | Oth Neuro<br>[3.17] | ASD<br>[0.84]       | Zika<br>[6292.53]   |
| Sonora          | Neonatal<br>[1.28] | Diarrhea<br>[1.49] | Congenital<br>[0.78] | Vit A<br>[0.64]      | Epilepsy<br>[2.37] | URI<br>[0.87]       | Iron<br>[0.35]      | Urticaria<br>[0.88] | Oth Neuro<br>[3.34] | ASD<br>[0.84]       |
| Tabasco         | Neonatal<br>[1.46] | Diarrhea<br>[1.7]  | Vit A<br>[0.86]      | Congenital<br>[0.8]  | Epilepsy<br>[2.16] | URI<br>[0.89]       | Urticaria<br>[0.87] | Oth Neuro<br>[3.04] | ASD<br>[0.87]       | Iron<br>[0.1]       |
| Tamaulipas      | Neonatal<br>[1.5]  | Diarrhea<br>[1.58] | Vit A<br>[0.79]      | Congenital<br>[0.72] | Epilepsy<br>[2.23] | URI<br>[0.87]       | Urticaria<br>[0.88] | Oth Neuro<br>[3.14] | ASD<br>[0.84]       | Whooping<br>[1.17]  |
| Tlaxcala        | Neonatal<br>[1.44] | Diarrhea<br>[1.24] | Congenital<br>[0.78] | Epilepsy<br>[2.24]   | Vit A<br>[0.39]    | URI<br>[0.9]        | Urticaria<br>[0.87] | Oth Neuro<br>[3.15] | ASD<br>[0.88]       | Whooping<br>[0.91]  |
| Veracruz        | Neonatal<br>[1.42] | Diarrhea<br>[1.19] | Vit A<br>[0.61]      | Congenital<br>[0.75] | Epilepsy<br>[2.09] | URI<br>[0.91]       | Urticaria<br>[0.87] | Oth Neuro<br>[2.94] | ASD<br>[0.9]        | PEM<br>[0.87]       |

**eFigure 9b. Leading ten causes of YLDs with the ratio of observed YLDs to YLDs expected on the basis of Socio-Demographic Index alone in 2017, <1 years, both sexes combined.**  
The top ten causes contributing to YLDs are listed globally, by socio-demographic quintile, and then by GBD superregion, region, country, and subnationally where modeled. For each cell, the ratio of observed YLDs to YLDs expected on the basis of socio-demographic index (SDI) alone are listed. Abbreviations: YLD=year of life lived with disability, GBD=Global Burden of Disease.

Values shown in brackets represent the ratio of observed YLDs to predicted YLDs on the basis of Socio-Demographic Index (SDI), rounded to two (2) digits. Color ranges (shown below) were calculated to place a roughly equal number of cells into each bin.

| COLOR KEY:                    |                    | [0.0-0.68]           | [0.68-0.82]          | [0.82-0.91]          | [0.91-1.01]          | [1.01-1.1]          | [1.1-1.21]          | [1.21-1.45]         | [1.45-2.25]         | 2.25+               |
|-------------------------------|--------------------|----------------------|----------------------|----------------------|----------------------|---------------------|---------------------|---------------------|---------------------|---------------------|
|                               | 1                  | 2                    | 3                    | 4                    | 5                    | 6                   | 7                   | 8                   | 9                   | 10                  |
| Yucatan                       | Neonatal<br>[1.28] | Diarrhea<br>[1.32]   | Congenital<br>[0.74] | Epilepsy<br>[2.26]   | Vit A<br>[0.4]       | URI<br>[0.88]       | Urticaria<br>[0.88] | Oth Neuro<br>[3.18] | ASD<br>[0.86]       | Iron<br>[0.18]      |
| Zacatecas                     | Neonatal<br>[0.97] | Diarrhea<br>[1.13]   | Congenital<br>[0.69] | Epilepsy<br>[2.25]   | Vit A<br>[0.42]      | URI<br>[0.9]        | Urticaria<br>[0.87] | Oth Neuro<br>[3.17] | ASD<br>[0.88]       | Whooping<br>[0.97]  |
| Nicaragua                     | Neonatal<br>[1.26] | Diarrhea<br>[1.93]   | Iron<br>[0.84]       | Congenital<br>[0.81] | Epilepsy<br>[1.36]   | Urticaria<br>[0.88] | URI<br>[0.79]       | ASD<br>[0.9]        | Vit A<br>[0.11]     | Oth Neuro<br>[1.92] |
| Panama                        | Diarrhea<br>[3.49] | Neonatal<br>[1.33]   | Congenital<br>[0.69] | Iron<br>[0.64]       | Vit A<br>[0.5]       | Epilepsy<br>[1.41]  | URI<br>[0.83]       | Urticaria<br>[0.88] | ASD<br>[0.79]       | Oth Neuro<br>[1.99] |
| Venezuela                     | Diarrhea<br>[3.68] | Neonatal<br>[1.42]   | Congenital<br>[0.71] | PEM<br>[8.95]        | Epilepsy<br>[1.8]    | Vit A<br>[0.31]     | URI<br>[0.84]       | Urticaria<br>[0.86] | ASD<br>[0.77]       | Oth Neuro<br>[2.55] |
| <b>Tropical Latin America</b> | Neonatal<br>[0.92] | Vit A<br>[1.04]      | Congenital<br>[0.78] | Diarrhea<br>[0.95]   | Iron<br>[0.83]       | URI<br>[0.86]       | Epilepsy<br>[1.18]  | Urticaria<br>[0.89] | ASD<br>[0.79]       | Scabies<br>[2.76]   |
| Brazil                        | Neonatal<br>[0.93] | Vit A<br>[1.06]      | Congenital<br>[0.78] | Diarrhea<br>[0.92]   | Iron<br>[0.88]       | URI<br>[0.86]       | Epilepsy<br>[1.2]   | Urticaria<br>[0.89] | ASD<br>[0.79]       | Scabies<br>[2.85]   |
| Acre                          | Neonatal<br>[0.91] | Vit A<br>[0.98]      | Diarrhea<br>[1.11]   | Congenital<br>[0.92] | Iron<br>[0.68]       | URI<br>[0.91]       | Urticaria<br>[0.87] | Epilepsy<br>[0.92]  | ASD<br>[0.85]       | Scabies<br>[1.77]   |
| Alagoas                       | Vit A<br>[1.0]     | Neonatal<br>[0.75]   | Diarrhea<br>[0.98]   | Congenital<br>[0.82] | Iron<br>[0.24]       | URI<br>[0.93]       | Urticaria<br>[0.89] | Epilepsy<br>[0.89]  | ASD<br>[0.89]       | Scabies<br>[1.76]   |
| Amapa                         | Neonatal<br>[0.93] | Vit A<br>[1.09]      | Iron<br>[1.1]        | Congenital<br>[0.75] | Diarrhea<br>[0.86]   | URI<br>[0.87]       | Urticaria<br>[1.04] | Epilepsy<br>[0.88]  | ASD<br>[0.79]       | Scabies<br>[2.7]    |
| Amazonas                      | Neonatal<br>[0.79] | Vit A<br>[0.87]      | Iron<br>[0.89]       | Congenital<br>[0.76] | Diarrhea<br>[0.87]   | URI<br>[0.88]       | Urticaria<br>[0.87] | Epilepsy<br>[0.96]  | ASD<br>[0.82]       | Scabies<br>[2.34]   |
| Bahia                         | Neonatal<br>[0.85] | Vit A<br>[1.02]      | Diarrhea<br>[0.99]   | Congenital<br>[0.82] | Iron<br>[0.65]       | URI<br>[0.91]       | Urticaria<br>[0.87] | Epilepsy<br>[0.93]  | ASD<br>[0.86]       | Scabies<br>[1.88]   |
| Ceara                         | Neonatal<br>[0.81] | Vit A<br>[0.86]      | Congenital<br>[0.83] | Iron<br>[0.73]       | Diarrhea<br>[0.86]   | URI<br>[0.91]       | Urticaria<br>[0.87] | Epilepsy<br>[0.92]  | Scabies<br>[2.31]   | ASD<br>[0.85]       |
| Distrito Federal              | Neonatal<br>[1.13] | Congenital<br>[0.81] | Diarrhea<br>[1.08]   | Vit A<br>[1.6]       | Iron<br>[1.64]       | URI<br>[0.79]       | Urticaria<br>[1.04] | Epilepsy<br>[1.46]  | ASD<br>[0.73]       | Scabies<br>[6.92]   |
| Espirito Santo                | Neonatal<br>[0.9]  | Iron<br>[1.6]        | Vit A<br>[1.2]       | Congenital<br>[0.73] | Diarrhea<br>[0.81]   | URI<br>[0.85]       | Urticaria<br>[0.89] | Epilepsy<br>[1.11]  | ASD<br>[0.79]       | Scabies<br>[2.95]   |
| Goiás                         | Neonatal<br>[0.81] | Vit A<br>[1.01]      | Iron<br>[0.98]       | Congenital<br>[0.75] | Diarrhea<br>[0.81]   | URI<br>[0.87]       | Urticaria<br>[0.88] | Epilepsy<br>[1.03]  | ASD<br>[0.81]       | Scabies<br>[2.56]   |
| Maranhao                      | Vit A<br>[0.8]     | Neonatal<br>[0.74]   | Iron<br>[0.53]       | Diarrhea<br>[0.72]   | Congenital<br>[0.78] | URI<br>[0.93]       | Urticaria<br>[0.91] | Epilepsy<br>[0.8]   | ASD<br>[0.91]       | Scabies<br>[1.69]   |
| Mato Grosso                   | Neonatal<br>[0.86] | Vit A<br>[0.92]      | Congenital<br>[0.75] | Diarrhea<br>[0.96]   | Iron<br>[0.93]       | URI<br>[0.86]       | Urticaria<br>[0.89] | Epilepsy<br>[1.06]  | ASD<br>[0.8]        | Scabies<br>[2.72]   |
| Mato Grosso do Sul            | Neonatal<br>[0.95] | Congenital<br>[0.85] | Vit A<br>[0.8]       | Diarrhea<br>[1.0]    | Iron<br>[0.67]       | URI<br>[0.86]       | Urticaria<br>[0.88] | Epilepsy<br>[1.05]  | ASD<br>[0.8]        | Scabies<br>[2.55]   |
| Minas Gerais                  | Neonatal<br>[0.94] | Vit A<br>[0.98]      | Iron<br>[0.98]       | Congenital<br>[0.76] | Diarrhea<br>[0.91]   | URI<br>[0.86]       | Urticaria<br>[0.88] | Epilepsy<br>[1.09]  | ASD<br>[0.8]        | Scabies<br>[2.71]   |
| Para                          | Neonatal<br>[0.79] | Vit A<br>[0.89]      | Diarrhea<br>[1.05]   | Iron<br>[0.78]       | Congenital<br>[0.78] | URI<br>[0.92]       | Urticaria<br>[0.88] | Epilepsy<br>[0.88]  | ASD<br>[0.87]       | Scabies<br>[1.96]   |
| Paraiba                       | Neonatal<br>[0.73] | Vit A<br>[0.88]      | Iron<br>[0.89]       | Diarrhea<br>[0.86]   | Congenital<br>[0.84] | URI<br>[0.92]       | Urticaria<br>[0.88] | Epilepsy<br>[0.86]  | ASD<br>[0.87]       | Scabies<br>[1.81]   |
| Parana                        | Neonatal<br>[0.95] | Vit A<br>[0.99]      | Congenital<br>[0.81] | Iron<br>[1.08]       | Diarrhea<br>[0.79]   | URI<br>[0.85]       | Urticaria<br>[0.9]  | Epilepsy<br>[1.15]  | ASD<br>[0.78]       | Scabies<br>[3.06]   |
| Pernambuco                    | Neonatal<br>[0.81] | Vit A<br>[1.06]      | Iron<br>[0.81]       | Congenital<br>[0.82] | Diarrhea<br>[0.81]   | URI<br>[0.91]       | Urticaria<br>[0.87] | Epilepsy<br>[0.94]  | ASD<br>[0.86]       | Scabies<br>[1.91]   |
| Piaui                         | Neonatal<br>[0.82] | Diarrhea<br>[0.81]   | Congenital<br>[0.82] | Vit A<br>[0.31]      | URI<br>[0.93]        | Iron<br>[0.2]       | Urticaria<br>[0.89] | Epilepsy<br>[0.87]  | ASD<br>[0.89]       | Scabies<br>[1.73]   |
| Rio de Janeiro                | Neonatal<br>[1.22] | Vit A<br>[1.06]      | Congenital<br>[0.72] | Diarrhea<br>[0.73]   | Epilepsy<br>[1.81]   | Iron<br>[0.65]      | URI<br>[0.83]       | Urticaria<br>[0.93] | ASD<br>[0.76]       | Scabies<br>[3.8]    |
| Rio Grande do Norte           | Neonatal<br>[0.75] | Vit A<br>[1.01]      | Diarrhea<br>[1.12]   | Iron<br>[0.8]        | Congenital<br>[0.78] | URI<br>[0.9]        | Urticaria<br>[0.87] | Epilepsy<br>[0.94]  | ASD<br>[0.84]       | Scabies<br>[1.98]   |
| Rio Grande do Sul             | Neonatal<br>[1.0]  | Congenital<br>[1.08] | Vit A<br>[1.14]      | Iron<br>[1.41]       | Epilepsy<br>[2.67]   | Diarrhea<br>[0.72]  | URI<br>[0.84]       | Urticaria<br>[0.91] | Oth Neuro<br>[3.77] | Scabies<br>[3.41]   |
| Rondonia                      | Neonatal<br>[0.93] | Congenital<br>[1.1]  | Vit A<br>[0.84]      | Diarrhea<br>[0.78]   | Iron<br>[0.46]       | URI<br>[0.88]       | Urticaria<br>[0.87] | Epilepsy<br>[0.94]  | ASD<br>[0.83]       | Scabies<br>[2.38]   |
| Roraima                       | Neonatal<br>[0.99] | Vit A<br>[0.98]      | Congenital<br>[0.77] | Diarrhea<br>[0.94]   | Iron<br>[0.54]       | URI<br>[0.87]       | Urticaria<br>[0.88] | Epilepsy<br>[1.0]   | ASD<br>[0.81]       | Scabies<br>[2.49]   |
| Santa Catarina                | Neonatal<br>[0.89] | Iron<br>[1.42]       | Congenital<br>[0.79] | Vit A<br>[0.99]      | Diarrhea<br>[0.8]    | URI<br>[0.84]       | Urticaria<br>[0.92] | Epilepsy<br>[1.13]  | ASD<br>[0.76]       | Scabies<br>[3.53]   |

**eFigure 9b. Leading ten causes of YLDs with the ratio of observed YLDs to YLDs expected on the basis of Socio-Demographic Index alone in 2017, <1 years, both sexes combined.**  
The top ten causes contributing to YLDs are listed globally, by socio-demographic quintile, and then by GBD superregion, region, country, and subnationally where modeled. For each cell, the ratio of observed YLDs to YLDs expected on the basis of socio-demographic index (SDI) alone are listed. Abbreviations: YLD=year of life lived with disability, GBD=Global Burden of Disease.

Values shown in brackets represent the ratio of observed YLDs to predicted YLDs on the basis of Socio-Demographic Index (SDI), rounded to two (2) digits. Color ranges (shown below) were calculated to place a roughly equal number of cells into each bin.

| COLOR KEY:                   |          | [0.0-0.68] | [0.68-0.82] | [0.82-0.91] | [0.91-1.01] | [1.01-1.1] | [1.1-1.21] | [1.21-1.45] | [1.45-2.25] | 2.25+      |    |
|------------------------------|----------|------------|-------------|-------------|-------------|------------|------------|-------------|-------------|------------|----|
|                              |          | 1          | 2           | 3           | 4           | 5          | 6          | 7           | 8           | 9          | 10 |
| Sao Paulo                    | Neonatal | Congenital | Diarrhea    | Vit A       | Epilepsy    | URI        | Urticaria  | Iron        | ASD         | Scabies    |    |
|                              | [1.05]   | [0.69]     | [0.7]       | [0.56]      | [1.51]      | [0.83]     | [0.94]     | [0.45]      | [0.76]      | [4.07]     |    |
| Sergipe                      | Neonatal | Vit A      | Iron        | Congenital  | Diarrhea    | URI        | Urticaria  | Epilepsy    | ASD         | Scabies    |    |
| Tocantins                    | Neonatal | Vit A      | Iron        | Diarrhea    | Congenital  | URI        | Urticaria  | Epilepsy    | ASD         | Scabies    |    |
|                              | [0.91]   | [0.85]     | [0.79]      | [0.88]      | [0.76]      | [0.9]      | [0.87]     | [0.92]      | [0.84]      | [2.04]     |    |
| Paraguay                     | Neonatal | Diarrhea   | Vit A       | Congenital  | URI         | Iron       | Epilepsy   | Urticaria   | ASD         | Scabies    |    |
|                              | [0.82]   | [1.65]     | [0.98]      | [0.8]       | [0.87]      | [0.28]     | [1.08]     | [0.86]      | [0.83]      | [2.11]     |    |
| North Africa and Middle East | Neonatal | Vit A      | Diarrhea    | Iron        | Congenital  | PEM        | Hernia     | Epilepsy    | URI         | Urticaria  |    |
|                              | [1.15]   | [1.47]     | [1.81]      | [1.41]      | [0.91]      | [8.12]     | [2.66]     | [1.37]      | [0.9]       | [0.92]     |    |
| Afghanistan                  | Vit A    | Neonatal   | Diarrhea    | Congenital  | Iron        | ID         | PEM        | Epilepsy    | Hernia      | URI        |    |
|                              | [0.57]   | [0.82]     | [1.19]      | [0.96]      | [0.34]      | [4.8]      | [0.3]      | [1.01]      | [5.68]      | [1.05]     |    |
| Algeria                      | Neonatal | Diarrhea   | Congenital  | Vit A       | PEM         | Hernia     | URI        | Epilepsy    | Urticaria   | ASD        |    |
|                              | [1.23]   | [1.74]     | [0.86]      | [1.03]      | [38.57]     | [2.16]     | [0.88]     | [1.38]      | [0.96]      | [0.64]     |    |
| Bahrain                      | Neonatal | Congenital | Diarrhea    | Hernia      | Vit A       | URI        | Epilepsy   | Urticaria   | ASD         | Blindness  |    |
|                              | [1.09]   | [0.77]     | [1.06]      | [1.83]      | [0.5]       | [0.87]     | [1.48]     | [0.98]      | [0.63]      | [2.0]      |    |
| Egypt                        | Neonatal | Diarrhea   | Iron        | Congenital  | Vit A       | Hernia     | Epilepsy   | Urticaria   | ID          | URI        |    |
|                              | [1.14]   | [2.09]     | [1.51]      | [0.89]      | [0.59]      | [3.21]     | [1.47]     | [0.94]      | [3.91]      | [0.67]     |    |
| Iran                         | Neonatal | Congenital | Diarrhea    | Vit A       | Hernia      | Epilepsy   | PEM        | URI         | Iron        | Urticaria  |    |
|                              | [1.47]   | [1.02]     | [1.02]      | [0.65]      | [2.18]      | [1.73]     | [19.62]    | [0.9]       | [0.52]      | [0.98]     |    |
| Iraq                         | Neonatal | Vit A      | Iron        | Diarrhea    | Congenital  | PEM        | Hernia     | Epilepsy    | URI         | Urticaria  |    |
|                              | [1.14]   | [1.15]     | [0.92]      | [0.91]      | [0.87]      | [2.88]     | [3.55]     | [1.23]      | [0.96]      | [0.91]     |    |
| Jordan                       | Neonatal | Vit A      | Iron        | Diarrhea    | Congenital  | Hernia     | Epilepsy   | Urticaria   | URI         | Hemog      |    |
|                              | [1.47]   | [2.17]     | [1.8]       | [1.37]      | [0.8]       | [2.35]     | [1.31]     | [0.95]      | [0.62]      | [2.94]     |    |
| Kuwait                       | Neonatal | Congenital | Diarrhea    | Iron        | Vit A       | Hernia     | URI        | Epilepsy    | Urticaria   | ASD        |    |
|                              | [1.31]   | [0.82]     | [1.53]      | [2.55]      | [1.29]      | [1.24]     | [0.84]     | [1.67]      | [1.09]      | [0.61]     |    |
| Lebanon                      | Neonatal | Diarrhea   | Congenital  | Hernia      | Vit A       | URI        | Urticaria  | Epilepsy    | Iron        | ASD        |    |
|                              | [1.13]   | [2.07]     | [0.85]      | [1.86]      | [0.59]      | [0.87]     | [1.0]      | [1.35]      | [0.57]      | [0.64]     |    |
| Libya                        | Neonatal | Diarrhea   | Congenital  | Vit A       | Iron        | Hernia     | URI        | Urticaria   | Epilepsy    | ID         |    |
|                              | [1.15]   | [2.2]      | [0.87]      | [1.37]      | [1.42]      | [1.65]     | [0.85]     | [1.04]      | [0.99]      | [3.92]     |    |
| Morocco                      | Neonatal | Vit A      | Diarrhea    | Congenital  | Hernia      | Iron       | URI        | Epilepsy    | Urticaria   | ID         |    |
|                              | [1.09]   | [1.03]     | [1.42]      | [0.91]      | [3.56]      | [0.3]      | [1.05]     | [1.18]      | [0.92]      | [2.77]     |    |
| Palestine                    | Neonatal | Vit A      | Diarrhea    | Congenital  | Iron        | Hernia     | URI        | Epilepsy    | Urticaria   | ID         |    |
|                              | [0.96]   | [0.62]     | [0.93]      | [0.87]      | [0.35]      | [4.01]     | [0.99]     | [1.04]      | [0.94]      | [3.26]     |    |
| Oman                         | Neonatal | Diarrhea   | PEM         | Vit A       | Congenital  | Iron       | Hernia     | URI         | Epilepsy    | Urticaria  |    |
|                              | [1.2]    | [1.7]      | [142.21]    | [1.68]      | [0.89]      | [1.44]     | [1.59]     | [0.85]      | [1.49]      | [1.02]     |    |
| Qatar                        | Neonatal | Congenital | Diarrhea    | URI         | Vit A       | Epilepsy   | Urticaria  | Hernia      | Blindness   | ASD        |    |
|                              | [1.12]   | [0.82]     | [1.03]      | [0.85]      | [0.74]      | [1.66]     | [1.05]     | [0.99]      | [2.39]      | [0.61]     |    |
| Saudi Arabia                 | Neonatal | Diarrhea   | Congenital  | Vit A       | Hernia      | URI        | Epilepsy   | Urticaria   | ASD         | Oth Neuro  |    |
|                              | [0.95]   | [1.77]     | [0.93]      | [1.03]      | [1.35]      | [0.84]     | [1.79]     | [1.08]      | [0.61]      | [2.54]     |    |
| Sudan                        | Diarrhea | Vit A      | Neonatal    | Iron        | PEM         | Congenital | Hemog      | ID          | Hernia      | Epilepsy   |    |
|                              | [1.94]   | [0.94]     | [0.95]      | [0.88]      | [3.41]      | [0.97]     | [2.25]     | [4.95]      | [4.78]      | [1.18]     |    |
| Syria                        | Neonatal | Vit A      | Congenital  | Iron        | Diarrhea    | Hernia     | URI        | Epilepsy    | PEM         | Urticaria  |    |
|                              | [1.06]   | [0.84]     | [0.86]      | [0.82]      | [0.78]      | [3.05]     | [0.94]     | [1.14]      | [2.43]      | [0.91]     |    |
| Tunisia                      | Neonatal | Iron       | Diarrhea    | Congenital  | Hernia      | URI        | Urticaria  | Vit A       | Epilepsy    | Hemog      |    |
|                              | [1.08]   | [1.62]     | [1.53]      | [0.81]      | [2.37]      | [0.9]      | [0.94]     | [0.27]      | [1.02]      | [2.49]     |    |
| Turkey                       | Neonatal | Congenital | Vit A       | Diarrhea    | Hernia      | URI        | Epilepsy   | Urticaria   | ASD         | Oth Neuro  |    |
|                              | [0.98]   | [0.79]     | [1.12]      | [1.03]      | [1.96]      | [1.03]     | [1.66]     | [0.97]      | [0.63]      | [2.36]     |    |
| UAE                          | Neonatal | Diarrhea   | Congenital  | PEM         | Vit A       | Epilepsy   | Hernia     | URI         | Iron        | Urticaria  |    |
|                              | [1.21]   | [2.12]     | [0.87]      | [557.19]    | [1.57]      | [1.98]     | [1.2]      | [0.83]      | [1.39]      | [1.11]     |    |
| Yemen                        | Iron     | Vit A      | Diarrhea    | Neonatal    | PEM         | Congenital | Hemog      | Oth NTD     | ID          | Oth Un Inf |    |
|                              | [3.01]   | [2.15]     | [2.13]      | [0.97]      | [3.18]      | [0.93]     | [2.57]     | [2.28]      | [5.06]      | [3.12]     |    |
| South Asia                   | Vit A    | Neonatal   | Iron        | PEM         | Congenital  | Diarrhea   | ID         | Hemog       | URI         | Urticaria  |    |
|                              | [1.71]   | [1.45]     | [1.69]      | [5.26]      | [0.96]      | [0.64]     | [6.3]      | [2.22]      | [0.92]      | [0.89]     |    |
| Bangladesh                   | Iron     | Neonatal   | Vit A       | Congenital  | PEM         | Diarrhea   | URI        | Hemog       | Oth NTD     | Urticaria  |    |
|                              | [1.63]   | [1.3]      | [0.51]      | [0.94]      | [1.23]      | [0.43]     | [1.18]     | [1.57]      | [1.3]       | [0.95]     |    |
| Bhutan                       | Iron     | Neonatal   | Vit A       | Congenital  | Diarrhea    | Oth NTD    | Hemog      | URI         | Epilepsy    | Oth Un Inf |    |
|                              | [3.49]   | [1.51]     | [1.21]      | [0.8]       | [0.71]      | [4.06]     | [2.21]     | [0.92]      | [1.08]      | [3.44]     |    |
| India                        | Vit A    | Neonatal   | Iron        | PEM         | Congenital  | ID         | Diarrhea   | Hemog       | URI         | Urticaria  |    |
|                              | [2.21]   | [1.45]     | [1.5]       | [7.4]       | [1.01]      | [8.37]     | [0.61]     | [2.34]      | [0.9]       | [0.88]     |    |
| Andhra Pradesh               | Vit A    | Neonatal   | PEM         | Iron        | Congenital  | ID         | Diarrhea   | Hemog       | URI         | Urticaria  |    |
|                              | [1.99]   | [1.49]     | [9.29]      | [1.18]      | [0.96]      | [6.95]     | [0.52]     | [1.98]      | [0.9]       | [0.89]     |    |

**eFigure 9b. Leading ten causes of YLDs with the ratio of observed YLDs to YLDs expected on the basis of Socio-Demographic Index alone in 2017, <1 years, both sexes combined.**  
The top ten causes contributing to YLDs are listed globally, by socio-demographic quintile, and then by GBD superregion, region, country, and subnationally where modeled. For each cell, the ratio of observed YLDs to YLDs expected on the basis of socio-demographic index (SDI) alone are listed. Abbreviations: YLD=year of life lived with disability, GBD=Global Burden of Disease.

Values shown in brackets represent the ratio of observed YLDs to predicted YLDs on the basis of Socio-Demographic Index (SDI), rounded to two (2) digits. Color ranges (shown below) were calculated to place a roughly equal number of cells into each bin.

| COLOR KEY:           |                    | [0.0-0.68]         | [0.68-0.82]          | [0.82-0.91]          | [0.91-1.01]          | [1.01-1.1]         | [1.1-1.21]           | [1.21-1.45]        | [1.45-2.25]         | 2.25+               |
|----------------------|--------------------|--------------------|----------------------|----------------------|----------------------|--------------------|----------------------|--------------------|---------------------|---------------------|
|                      | 1                  | 2                  | 3                    | 4                    | 5                    | 6                  | 7                    | 8                  | 9                   | 10                  |
| Arunachal Pradesh    | Vit A<br>[2.03]    | Neonatal<br>[1.47] | PEM<br>[11.2]        | Iron<br>[1.53]       | Congenital<br>[0.97] | ID<br>[6.86]       | Diarrhea<br>[0.53]   | Hemog<br>[2.09]    | URI<br>[0.9]        | Urticaria<br>[0.88] |
| Assam                | Vit A<br>[1.62]    | Neonatal<br>[1.42] | PEM<br>[3.84]        | Congenital<br>[1.05] | Iron<br>[0.62]       | ID<br>[8.88]       | Diarrhea<br>[0.56]   | URI<br>[0.91]      | Hemog<br>[1.64]     | Skin Fung<br>[2.62] |
| Bihar                | Vit A<br>[1.53]    | Neonatal<br>[1.28] | Iron<br>[1.2]        | PEM<br>[2.64]        | Congenital<br>[1.04] | ID<br>[9.54]       | Diarrhea<br>[0.61]   | Hemog<br>[1.79]    | URI<br>[0.93]       | Urticaria<br>[0.94] |
| Chhattisgarh         | Vit A<br>[1.82]    | Neonatal<br>[1.43] | Iron<br>[0.92]       | PEM<br>[3.99]        | Congenital<br>[1.0]  | ID<br>[7.76]       | Diarrhea<br>[0.46]   | Hemog<br>[2.0]     | URI<br>[0.91]       | Urticaria<br>[0.9]  |
| Delhi                | Iron<br>[9.58]     | Vit A<br>[4.48]    | Neonatal<br>[1.66]   | PEM<br>[155.11]      | Congenital<br>[0.81] | Diarrhea<br>[1.0]  | Oth NTD<br>[3588.08] | Hemog<br>[7.66]    | Oth Un Inf<br>[8.9] | ID<br>[6.08]        |
| Goa                  | Neonatal<br>[1.96] | Iron<br>[6.15]     | PEM<br>[313.89]      | Vit A<br>[3.53]      | Congenital<br>[0.84] | Diarrhea<br>[0.96] | URI<br>[0.79]        | ID<br>[5.68]       | Hemog<br>[5.34]     | Urticaria<br>[0.96] |
| Gujarat              | Vit A<br>[2.47]    | PEM<br>[17.06]     | Neonatal<br>[1.54]   | Iron<br>[1.86]       | Congenital<br>[0.95] | Diarrhea<br>[0.61] | ID<br>[6.67]         | Hemog<br>[2.57]    | URI<br>[0.89]       | Urticaria<br>[0.87] |
| Haryana              | Vit A<br>[3.0]     | Iron<br>[3.45]     | Neonatal<br>[1.54]   | Congenital<br>[0.92] | PEM<br>[6.21]        | Diarrhea<br>[0.64] | Hemog<br>[3.56]      | ID<br>[5.88]       | Oth NTD<br>[5.96]   | URI<br>[0.88]       |
| Himachal Pradesh     | Vit A<br>[3.19]    | Neonatal<br>[1.71] | Iron<br>[1.72]       | PEM<br>[17.53]       | Congenital<br>[0.88] | Diarrhea<br>[0.62] | ID<br>[6.97]         | Hemog<br>[3.44]    | URI<br>[0.85]       | Urticaria<br>[0.87] |
| Jammu & Kashmir      | Vit A<br>[2.81]    | Neonatal<br>[1.46] | Iron<br>[1.6]        | Congenital<br>[0.96] | PEM<br>[4.67]        | ID<br>[8.33]       | Diarrhea<br>[0.57]   | Hemog<br>[2.74]    | URI<br>[0.89]       | Urticaria<br>[0.87] |
| Jharkhand            | Vit A<br>[1.86]    | Iron<br>[1.64]     | Neonatal<br>[1.4]    | PEM<br>[4.38]        | Congenital<br>[1.01] | ID<br>[7.85]       | Diarrhea<br>[0.52]   | Hemog<br>[2.12]    | URI<br>[0.91]       | Oth NTD<br>[1.49]   |
| Karnataka            | Vit A<br>[2.37]    | Neonatal<br>[1.68] | PEM<br>[12.95]       | Iron<br>[1.87]       | Congenital<br>[0.92] | Diarrhea<br>[0.55] | ID<br>[6.8]          | Hemog<br>[2.42]    | Epilepsy<br>[1.2]   | URI<br>[0.89]       |
| Kerala               | Neonatal<br>[1.96] | PEM<br>[49.93]     | Vit A<br>[2.28]      | Iron<br>[1.33]       | Congenital<br>[0.85] | ID<br>[6.84]       | Diarrhea<br>[0.45]   | URI<br>[0.84]      | Urticaria<br>[0.89] | Hemog<br>[2.28]     |
| Madhya Pradesh       | Vit A<br>[1.72]    | Neonatal<br>[1.3]  | PEM<br>[5.34]        | Iron<br>[1.3]        | Congenital<br>[1.03] | ID<br>[8.58]       | Diarrhea<br>[0.52]   | Hemog<br>[1.96]    | URI<br>[0.92]       | Urticaria<br>[0.91] |
| Maharashtra          | Vit A<br>[2.53]    | Neonatal<br>[1.6]  | PEM<br>[29.24]       | Iron<br>[1.7]        | Congenital<br>[0.91] | Diarrhea<br>[0.71] | ID<br>[6.94]         | URI<br>[0.86]      | Hemog<br>[2.45]     | Urticaria<br>[0.86] |
| Manipur              | Neonatal<br>[1.61] | Vit A<br>[1.76]    | Congenital<br>[0.97] | Iron<br>[0.79]       | PEM<br>[4.67]        | ID<br>[9.09]       | Diarrhea<br>[0.66]   | URI<br>[0.89]      | Urticaria<br>[0.87] | Epilepsy<br>[0.79]  |
| Meghalaya            | Neonatal<br>[1.57] | Vit A<br>[1.84]    | PEM<br>[8.23]        | Iron<br>[1.0]        | Congenital<br>[0.99] | ID<br>[8.2]        | Diarrhea<br>[0.62]   | URI<br>[0.91]      | Urticaria<br>[0.88] | Hemog<br>[1.74]     |
| Mizoram              | Neonatal<br>[1.66] | PEM<br>[20.52]     | Vit A<br>[1.64]      | Congenital<br>[0.93] | Diarrhea<br>[0.73]   | ID<br>[8.07]       | URI<br>[0.44]        | Iron<br>[0.88]     | Urticaria<br>[0.87] | Epilepsy<br>[0.88]  |
| Nagaland             | Neonatal<br>[1.79] | Vit A<br>[2.37]    | PEM<br>[23.5]        | Iron<br>[1.11]       | Congenital<br>[0.93] | Diarrhea<br>[0.63] | ID<br>[7.4]          | Iodine<br>[91.63]  | URI<br>[0.85]       | Urticaria<br>[0.87] |
| Odisha               | Vit A<br>[1.76]    | Neonatal<br>[1.39] | PEM<br>[7.67]        | Iron<br>[1.05]       | Congenital<br>[1.03] | Diarrhea<br>[0.64] | ID<br>[8.29]         | Hemog<br>[1.88]    | URI<br>[0.91]       | Urticaria<br>[0.89] |
| Punjab               | Vit A<br>[2.65]    | Neonatal<br>[1.57] | Iron<br>[2.11]       | PEM<br>[10.75]       | Congenital<br>[0.92] | Diarrhea<br>[0.63] | ID<br>[6.77]         | Hemog<br>[2.95]    | URI<br>[0.86]       | Urticaria<br>[0.87] |
| Rajasthan            | Vit A<br>[1.75]    | Neonatal<br>[1.29] | PEM<br>[3.96]        | Iron<br>[0.88]       | Congenital<br>[1.0]  | ID<br>[8.1]        | Diarrhea<br>[0.53]   | Hemog<br>[1.76]    | URI<br>[0.92]       | Urticaria<br>[0.91] |
| Sikkim               | Neonatal<br>[1.68] | Vit A<br>[2.48]    | Iron<br>[1.9]        | Congenital<br>[0.88] | Diarrhea<br>[0.75]   | PEM<br>[6.06]      | ID<br>[6.03]         | URI<br>[0.86]      | Hemog<br>[2.61]     | Urticaria<br>[0.87] |
| Tamil Nadu           | PEM<br>[26.82]     | Neonatal<br>[1.51] | Vit A<br>[2.03]      | Iron<br>[1.62]       | Congenital<br>[0.8]  | ID<br>[7.22]       | Diarrhea<br>[0.51]   | URI<br>[0.86]      | Urticaria<br>[0.87] | Hemog<br>[2.18]     |
| Telangana            | Vit A<br>[2.47]    | Neonatal<br>[1.55] | PEM<br>[13.97]       | Iron<br>[1.8]        | Congenital<br>[0.93] | ID<br>[6.9]        | Diarrhea<br>[0.5]    | Hemog<br>[2.49]    | URI<br>[0.89]       | Urticaria<br>[0.87] |
| Tripura              | Vit A<br>[2.11]    | Neonatal<br>[1.47] | PEM<br>[10.01]       | Iron<br>[1.47]       | Congenital<br>[0.97] | ID<br>[8.19]       | Diarrhea<br>[0.58]   | Hemog<br>[2.13]    | URI<br>[0.91]       | Urticaria<br>[0.88] |
| Uttar Pradesh        | Vit A<br>[2.0]     | Neonatal<br>[1.29] | Iron<br>[1.31]       | PEM<br>[2.78]        | Congenital<br>[1.11] | ID<br>[8.65]       | Diarrhea<br>[0.64]   | Hemog<br>[2.24]    | URI<br>[0.91]       | Urticaria<br>[0.91] |
| Uttarakhand          | Vit A<br>[2.88]    | Neonatal<br>[1.67] | Iron<br>[2.64]       | PEM<br>[7.68]        | Congenital<br>[0.93] | Diarrhea<br>[0.71] | ID<br>[6.5]          | Hemog<br>[3.17]    | URI<br>[0.88]       | Urticaria<br>[0.84] |
| W Bengal             | Vit A<br>[1.99]    | Neonatal<br>[1.34] | PEM<br>[7.01]        | Iron<br>[1.33]       | Congenital<br>[0.98] | ID<br>[9.08]       | Diarrhea<br>[0.41]   | Hemog<br>[2.01]    | URI<br>[0.91]       | Urticaria<br>[0.89] |
| UTs other than Delhi | Neonatal<br>[1.81] | Vit A<br>[3.19]    | Iron<br>[2.37]       | PEM<br>[23.24]       | Congenital<br>[0.87] | Diarrhea<br>[0.64] | ID<br>[6.07]         | Hemog<br>[3.53]    | URI<br>[0.84]       | Urticaria<br>[0.88] |
| Nepal                | Neonatal<br>[1.4]  | Iron<br>[1.31]     | Vit A<br>[0.55]      | Congenital<br>[0.84] | Diarrhea<br>[0.42]   | Epilepsy<br>[1.22] | URI<br>[0.98]        | Urticaria<br>[1.0] | Oth NTD<br>[0.97]   | ID<br>[2.29]        |

**eFigure 9b. Leading ten causes of YLDs with the ratio of observed YLDs to YLDs expected on the basis of Socio-Demographic Index alone in 2017, <1 years, both sexes combined.**  
The top ten causes contributing to YLDs are listed globally, by socio-demographic quintile, and then by GBD superregion, region, country, and subnationally where modeled. For each cell, the ratio of observed YLDs to YLDs expected on the basis of socio-demographic index (SDI) alone are listed. Abbreviations: YLD=year of life lived with disability, GBD=Global Burden of Disease.

Values shown in brackets represent the ratio of observed YLDs to predicted YLDs on the basis of Socio-Demographic Index (SDI), rounded to two (2) digits. Color ranges (shown below) were calculated to place a roughly equal number of cells into each bin.

| COLOR KEY:                             |                    | [0.0-0.68]           | [0.68-0.82]          | [0.82-0.91]          | [0.91-1.01]          | [1.01-1.1]           | [1.1-1.21]          | [1.21-1.45]         | [1.45-2.25]         | 2.25+              |
|----------------------------------------|--------------------|----------------------|----------------------|----------------------|----------------------|----------------------|---------------------|---------------------|---------------------|--------------------|
|                                        | 1                  | 2                    | 3                    | 4                    | 5                    | 6                    | 7                   | 8                   | 9                   | 10                 |
| Pakistan                               | Iron<br>[2.25]     | Neonatal<br>[1.48]   | Vit A<br>[0.64]      | Diarrhea<br>[0.88]   | Congenital<br>[0.78] | PEM<br>[1.63]        | Hemog<br>[2.14]     | Oth NTD<br>[1.91]   | Epilepsy<br>[1.16]  | URI<br>[0.88]      |
| Southeast Asia, East Asia, and Oceania | Neonatal<br>[1.17] | Diarrhea<br>[1.52]   | Vit A<br>[1.01]      | Congenital<br>[0.81] | Iron<br>[0.73]       | PEM<br>[17.04]       | URI<br>[0.92]       | Urticaria<br>[0.84] | Epilepsy<br>[0.89]  | ASD<br>[0.72]      |
| East Asia                              | Neonatal<br>[1.42] | Diarrhea<br>[1.68]   | Congenital<br>[0.72] | Vit A<br>[0.84]      | URI<br>[0.86]        | Other MN<br>[22.29]  | Urticaria<br>[0.85] | Iron<br>[0.35]      | ASD<br>[0.72]       | Scabies<br>[3.79]  |
| China                                  | Neonatal<br>[1.42] | Diarrhea<br>[1.6]    | Congenital<br>[0.71] | Vit A<br>[0.81]      | URI<br>[0.87]        | Other MN<br>[23.24]  | Urticaria<br>[0.84] | ASD<br>[0.72]       | Iron<br>[0.32]      | Scabies<br>[3.65]  |
| N Korea                                | Diarrhea<br>[3.16] | Iron<br>[0.88]       | Neonatal<br>[0.61]   | Vit A<br>[0.64]      | Congenital<br>[0.85] | PEM<br>[1.53]        | URI<br>[0.95]       | Urticaria<br>[0.8]  | Scabies<br>[1.7]    | Epilepsy<br>[0.63] |
| Taiwan                                 | Diarrhea<br>[4.19] | Neonatal<br>[0.73]   | Congenital<br>[0.97] | URI<br>[0.82]        | Urticaria<br>[1.15]  | Other MN<br>[7.34]   | Epilepsy<br>[1.44]  | Vit A<br>[1.45]     | Scabies<br>[13.27]  | ASD<br>[0.54]      |
| Oceania                                | Iron<br>[1.82]     | Diarrhea<br>[1.52]   | Vit A<br>[0.61]      | PEM<br>[2.88]        | Neonatal<br>[0.64]   | Congenital<br>[0.97] | URI<br>[0.96]       | Oth NTD<br>[1.46]   | Hemog<br>[1.27]     | Scabies<br>[2.28]  |
| Am Samoa                               | Diarrhea<br>[1.83] | Neonatal<br>[0.68]   | Vit A<br>[1.16]      | Congenital<br>[0.78] | Iron<br>[0.67]       | URI<br>[0.85]        | Urticaria<br>[0.85] | Scabies<br>[3.77]   | Epilepsy<br>[0.85]  | PEM<br>[9.68]      |
| Micronesia                             | Vit A<br>[1.65]    | Diarrhea<br>[1.33]   | Neonatal<br>[0.62]   | Congenital<br>[0.91] | PEM<br>[1.72]        | URI<br>[0.94]        | Urticaria<br>[0.81] | Iron<br>[0.18]      | Scabies<br>[2.22]   | Epilepsy<br>[0.68] |
| Fiji                                   | Diarrhea<br>[2.17] | Iron<br>[1.74]       | Vit A<br>[1.22]      | Neonatal<br>[0.71]   | Congenital<br>[0.81] | PEM<br>[9.23]        | URI<br>[0.88]       | Urticaria<br>[0.81] | Scabies<br>[3.17]   | Epilepsy<br>[0.81] |
| Guam                                   | Diarrhea<br>[3.51] | Neonatal<br>[0.83]   | Vit A<br>[3.13]      | Congenital<br>[0.76] | URI<br>[0.81]        | Urticaria<br>[0.98]  | Scabies<br>[8.39]   | Epilepsy<br>[1.04]  | ASD<br>[0.62]       | Iron<br>[0.64]     |
| Kiribati                               | Vit A<br>[0.95]    | Diarrhea<br>[1.37]   | Neonatal<br>[0.59]   | PEM<br>[1.66]        | Iron<br>[0.49]       | Congenital<br>[0.98] | URI<br>[0.98]       | Scabies<br>[2.25]   | Urticaria<br>[0.88] | Epilepsy<br>[0.62] |
| Marshall                               | Vit A<br>[2.06]    | Diarrhea<br>[1.3]    | Iron<br>[0.87]       | Neonatal<br>[0.62]   | Congenital<br>[0.91] | PEM<br>[1.54]        | URI<br>[0.94]       | Urticaria<br>[0.82] | Scabies<br>[2.16]   | Epilepsy<br>[0.66] |
| N Mariana                              | Diarrhea<br>[2.74] | Neonatal<br>[0.84]   | Congenital<br>[0.76] | Vit A<br>[1.15]      | URI<br>[0.82]        | Iron<br>[0.88]       | Urticaria<br>[0.92] | Scabies<br>[6.37]   | ASD<br>[0.63]       | Epilepsy<br>[0.92] |
| PNG                                    | Iron<br>[1.86]     | Diarrhea<br>[1.44]   | PEM<br>[2.46]        | Neonatal<br>[0.62]   | Vit A<br>[0.45]      | Congenital<br>[0.97] | Oth NTD<br>[1.28]   | URI<br>[0.98]       | Hemog<br>[1.29]     | Scabies<br>[2.36]  |
| Samoa                                  | Vit A<br>[1.22]    | Diarrhea<br>[1.41]   | Iron<br>[1.06]       | Neonatal<br>[0.62]   | Congenital<br>[0.84] | URI<br>[0.93]        | Urticaria<br>[0.82] | Scabies<br>[2.2]    | Epilepsy<br>[0.7]   | ASD<br>[0.74]      |
| Solomon                                | Vit A<br>[1.06]    | Diarrhea<br>[1.21]   | Iron<br>[0.6]        | Neonatal<br>[0.56]   | Congenital<br>[0.93] | PEM<br>[0.6]         | URI<br>[0.98]       | Urticaria<br>[0.88] | Scabies<br>[2.25]   | Malaria<br>[6.56]  |
| Tonga                                  | Vit A<br>[1.19]    | Neonatal<br>[0.66]   | Diarrhea<br>[1.4]    | Congenital<br>[0.83] | PEM<br>[6.67]        | URI<br>[0.9]         | Urticaria<br>[0.81] | Scabies<br>[2.81]   | Iron<br>[0.19]      | Epilepsy<br>[0.71] |
| Vanuatu                                | Vit A<br>[1.08]    | Diarrhea<br>[1.23]   | Neonatal<br>[0.6]    | Iron<br>[0.62]       | Congenital<br>[0.91] | PEM<br>[0.93]        | URI<br>[0.96]       | Urticaria<br>[0.86] | Scabies<br>[2.06]   | Epilepsy<br>[0.63] |
| Southeast Asia                         | Neonatal<br>[0.79] | Vit A<br>[1.18]      | PEM<br>[17.56]       | Diarrhea<br>[1.24]   | Congenital<br>[0.99] | Iron<br>[1.03]       | URI<br>[1.03]       | Epilepsy<br>[1.08]  | Urticaria<br>[0.84] | Scabies<br>[2.77]  |
| Cambodia                               | Iron<br>[1.8]      | Neonatal<br>[0.73]   | Vit A<br>[0.63]      | Diarrhea<br>[0.97]   | Congenital<br>[1.07] | PEM<br>[1.28]        | Hemog<br>[2.0]      | Epilepsy<br>[1.2]   | Oth NTD<br>[1.54]   | URI<br>[0.86]      |
| Indonesia                              | PEM<br>[40.22]     | Neonatal<br>[0.81]   | Diarrhea<br>[1.74]   | Vit A<br>[1.07]      | Congenital<br>[0.95] | URI<br>[1.12]        | Urticaria<br>[0.85] | Epilepsy<br>[1.08]  | Scabies<br>[2.93]   | ASD<br>[0.71]      |
| Laos                                   | Vit A<br>[0.86]    | Neonatal<br>[0.74]   | Congenital<br>[1.12] | Diarrhea<br>[0.97]   | Iron<br>[0.45]       | URI<br>[0.95]        | Epilepsy<br>[0.99]  | Urticaria<br>[0.85] | Scabies<br>[1.92]   | ASD<br>[0.83]      |
| Malaysia                               | Neonatal<br>[0.89] | PEM<br>[280.02]      | Diarrhea<br>[1.67]   | Congenital<br>[0.9]  | Iron<br>[1.06]       | URI<br>[0.82]        | Epilepsy<br>[1.39]  | Urticaria<br>[0.94] | ASD<br>[0.68]       | Scabies<br>[5.7]   |
| Maldives                               | Neonatal<br>[0.7]  | Iron<br>[1.2]        | Vit A<br>[0.92]      | Congenital<br>[0.91] | PEM<br>[17.16]       | Hemog<br>[7.27]      | Diarrhea<br>[0.64]  | URI<br>[0.91]       | Urticaria<br>[0.84] | Epilepsy<br>[0.98] |
| Mauritius                              | Iron<br>[3.34]     | Neonatal<br>[0.89]   | PEM<br>[101.5]       | Diarrhea<br>[1.67]   | Congenital<br>[0.87] | Vit A<br>[0.71]      | URI<br>[0.83]       | Epilepsy<br>[1.38]  | Urticaria<br>[0.89] | Scabies<br>[4.35]  |
| Myanmar                                | Neonatal<br>[0.83] | Vit A<br>[0.87]      | Iron<br>[0.98]       | Congenital<br>[1.35] | Diarrhea<br>[1.01]   | PEM<br>[1.51]        | URI<br>[0.94]       | Epilepsy<br>[1.03]  | Urticaria<br>[0.84] | Hemog<br>[1.47]    |
| Philippines                            | Vit A<br>[1.6]     | Iron<br>[1.59]       | Neonatal<br>[0.85]   | Congenital<br>[1.01] | Diarrhea<br>[0.77]   | PEM<br>[4.19]        | URI<br>[1.28]       | Epilepsy<br>[1.09]  | Urticaria<br>[0.82] | Scabies<br>[2.45]  |
| Sri Lanka                              | Neonatal<br>[0.79] | PEM<br>[41.01]       | Congenital<br>[0.96] | Vit A<br>[0.98]      | Diarrhea<br>[0.77]   | Iron<br>[0.76]       | Epilepsy<br>[1.79]  | URI<br>[0.86]       | Urticaria<br>[0.85] | ASD<br>[0.74]      |
| Seychelles                             | Neonatal<br>[0.85] | Congenital<br>[0.88] | Diarrhea<br>[1.03]   | Vit A<br>[0.73]      | PEM<br>[16.21]       | URI<br>[0.85]        | Epilepsy<br>[1.32]  | Urticaria<br>[0.87] | Iron<br>[0.34]      | Scabies<br>[3.54]  |
| Thailand                               | Iron<br>[2.53]     | Vit A<br>[1.65]      | Neonatal<br>[0.71]   | Congenital<br>[0.98] | Diarrhea<br>[0.93]   | Hemog<br>[5.19]      | PEM<br>[11.05]      | Urticaria<br>[0.86] | URI<br>[0.7]        | Epilepsy<br>[1.09] |

**eFigure 9b. Leading ten causes of YLDs with the ratio of observed YLDs to YLDs expected on the basis of Socio-Demographic Index alone in 2017, <1 years, both sexes combined.**  
The top ten causes contributing to YLDs are listed globally, by socio-demographic quintile, and then by GBD superregion, region, country, and subnationally where modeled. For each cell, the ratio of observed YLDs to YLDs expected on the basis of socio-demographic index (SDI) alone are listed. Abbreviations: YLD=year of life lived with disability, GBD=Global Burden of Disease.

Values shown in brackets represent the ratio of observed YLDs to predicted YLDs on the basis of Socio-Demographic Index (SDI), rounded to two (2) digits. Color ranges (shown below) were calculated to place a roughly equal number of cells into each bin.

| COLOR KEY:                 |                    | [0.0-0.68]           | [0.68-0.82]          | [0.82-0.91]          | [0.91-1.01]          | [1.01-1.1]           | [1.1-1.21]          | [1.21-1.45]          | [1.45-2.25]         | 2.25+                |
|----------------------------|--------------------|----------------------|----------------------|----------------------|----------------------|----------------------|---------------------|----------------------|---------------------|----------------------|
|                            | 1                  | 2                    | 3                    | 4                    | 5                    | 6                    | 7                   | 8                    | 9                   | 10                   |
| Timor-Leste                | Iron<br>[1.83]     | Vit A<br>[1.08]      | PEM<br>[4.87]        | Neonatal<br>[0.7]    | Diarrhea<br>[1.02]   | Congenital<br>[1.07] | URI<br>[0.96]       | Hemog<br>[1.58]      | Oth NTD<br>[1.68]   | Urticaria<br>[0.85]  |
| Vietnam                    | Neonatal<br>[0.61] | Congenital<br>[0.91] | Vit A<br>[0.69]      | Diarrhea<br>[0.9]    | Iron<br>[0.76]       | PEM<br>[4.41]        | URI<br>[0.78]       | Urticaria<br>[0.82]  | Epilepsy<br>[0.78]  | Scabies<br>[2.1]     |
| Sub-Saharan Africa         | Iron<br>[1.63]     | Neonatal<br>[1.42]   | Vit A<br>[1.09]      | Diarrhea<br>[1.05]   | Congenital<br>[1.19] | PEM<br>[1.17]        | Hemog<br>[1.85]     | Malaria<br>[19.1]    | Epilepsy<br>[1.14]  | Oth NTD<br>[1.25]    |
| Central Sub-Saharan Africa | Neonatal<br>[1.76] | Vit A<br>[1.42]      | Iron<br>[1.45]       | Diarrhea<br>[1.41]   | Congenital<br>[1.18] | PEM<br>[1.23]        | Malaria<br>[36.65]  | Epilepsy<br>[1.71]   | Hemog<br>[2.28]     | URI<br>[1.29]        |
| Angola                     | Iron<br>[2.04]     | Neonatal<br>[1.82]   | Vit A<br>[1.11]      | Diarrhea<br>[1.46]   | Congenital<br>[1.19] | Epilepsy<br>[1.99]   | Hemog<br>[2.3]      | URI<br>[1.4]         | Oth NTD<br>[1.65]   | PEM<br>[0.68]        |
| C African Rep              | Neonatal<br>[1.64] | Vit A<br>[0.98]      | Iron<br>[1.24]       | Diarrhea<br>[1.37]   | Congenital<br>[1.2]  | Malaria<br>[4.51]    | PEM<br>[0.69]       | Epilepsy<br>[1.8]    | URI<br>[1.71]       | Hemog<br>[1.37]      |
| Congo                      | Vit A<br>[2.74]    | Neonatal<br>[2.07]   | Iron<br>[1.83]       | Diarrhea<br>[1.58]   | PEM<br>[5.4]         | Congenital<br>[1.02] | Epilepsy<br>[2.14]  | URI<br>[1.27]        | Malaria<br>[358.15] | Hemog<br>[1.96]      |
| Congo DR                   | Vit A<br>[1.12]    | Neonatal<br>[1.57]   | Iron<br>[1.06]       | Diarrhea<br>[1.2]    | Congenital<br>[1.16] | PEM<br>[0.85]        | Malaria<br>[7.43]   | Hemog<br>[1.85]      | Epilepsy<br>[1.5]   | URI<br>[1.28]        |
| Eq Guinea                  | Neonatal<br>[2.12] | Diarrhea<br>[1.8]    | Vit A<br>[1.14]      | Iron<br>[1.21]       | Congenital<br>[0.98] | Epilepsy<br>[2.5]    | Malaria<br>[965.79] | URI<br>[1.31]        | Oth Neuro<br>[3.53] | Urticaria<br>[0.82]  |
| Gabon                      | Neonatal<br>[2.21] | Iron<br>[3.38]       | Vit A<br>[1.78]      | Diarrhea<br>[1.94]   | Congenital<br>[0.93] | Epilepsy<br>[2.62]   | URI<br>[1.34]       | Malaria<br>[1818.02] | Hemog<br>[3.21]     | Oth Neuro<br>[3.69]  |
| Eastern Sub-Saharan Africa | Vit A<br>[1.0]     | Neonatal<br>[1.28]   | Iron<br>[1.2]        | Diarrhea<br>[0.96]   | Congenital<br>[1.2]  | PEM<br>[0.65]        | Epilepsy<br>[1.04]  | URI<br>[0.96]        | Hemog<br>[0.98]     | Urticaria<br>[0.92]  |
| Burundi                    | Iron<br>[1.7]      | Neonatal<br>[1.21]   | Vit A<br>[0.47]      | Diarrhea<br>[0.81]   | Congenital<br>[1.17] | PEM<br>[0.78]        | Malaria<br>[1.75]   | Oth NTD<br>[1.03]    | Epilepsy<br>[1.12]  | Oth Un Inf<br>[1.67] |
| Comoros                    | Neonatal<br>[1.43] | Vit A<br>[0.82]      | Iron<br>[0.99]       | Diarrhea<br>[1.08]   | Congenital<br>[1.07] | PEM<br>[1.05]        | URI<br>[0.98]       | Epilepsy<br>[1.03]   | Urticaria<br>[0.89] | ASD<br>[1.02]        |
| Djibouti                   | Neonatal<br>[1.47] | Iron<br>[1.13]       | PEM<br>[3.06]        | Congenital<br>[1.06] | Diarrhea<br>[1.06]   | Vit A<br>[0.35]      | Epilepsy<br>[1.14]  | URI<br>[0.95]        | Urticaria<br>[0.87] | ASD<br>[1.02]        |
| Eritrea                    | Neonatal<br>[1.4]  | Vit A<br>[0.9]       | Iron<br>[0.85]       | Diarrhea<br>[0.98]   | Congenital<br>[1.14] | PEM<br>[1.34]        | Epilepsy<br>[1.07]  | URI<br>[0.96]        | Urticaria<br>[0.91] | ASD<br>[1.04]        |
| Ethiopia                   | Vit A<br>[1.33]    | Iron<br>[1.15]       | Neonatal<br>[1.06]   | Diarrhea<br>[0.86]   | Congenital<br>[1.11] | PEM<br>[0.84]        | Oth NTD<br>[0.73]   | Urticaria<br>[0.95]  | Hemog<br>[0.83]     | ASD<br>[1.04]        |
| Kenya                      | Neonatal<br>[1.43] | Vit A<br>[1.21]      | Diarrhea<br>[1.42]   | Congenital<br>[1.36] | Iron<br>[0.4]        | URI<br>[1.12]        | PEM<br>[0.8]        | Urticaria<br>[0.87]  | Epilepsy<br>[0.87]  | Hemog<br>[1.24]      |
| Baringo                    | Vit A<br>[1.4]     | Neonatal<br>[1.29]   | Diarrhea<br>[1.48]   | Congenital<br>[1.36] | Iron<br>[0.39]       | PEM<br>[0.82]        | URI<br>[1.13]       | Hemog<br>[1.44]      | Urticaria<br>[0.9]  | ASD<br>[1.02]        |
| Bomet                      | Neonatal<br>[1.48] | Diarrhea<br>[1.28]   | Vit A<br>[0.65]      | Congenital<br>[1.27] | URI<br>[1.12]        | Urticaria<br>[0.88]  | HIV<br>[42.92]      | Epilepsy<br>[0.79]   | ASD<br>[1.01]       | Hearing<br>[3.28]    |
| Bungoma                    | Vit A<br>[1.24]    | Neonatal<br>[1.33]   | Diarrhea<br>[1.56]   | Congenital<br>[1.34] | Iron<br>[0.44]       | PEM<br>[1.0]         | URI<br>[1.13]       | Hemog<br>[1.27]      | Urticaria<br>[0.89] | ASD<br>[1.01]        |
| Busia                      | Vit A<br>[1.68]    | Neonatal<br>[1.33]   | Diarrhea<br>[1.48]   | Congenital<br>[1.38] | Iron<br>[0.57]       | Malaria<br>[25.38]   | Hemog<br>[1.79]     | URI<br>[1.13]        | Urticaria<br>[0.9]  | Epilepsy<br>[0.79]   |
| Elgeyo-Marakwet            | Neonatal<br>[1.4]  | Vit A<br>[1.24]      | Diarrhea<br>[1.46]   | Congenital<br>[1.32] | Iron<br>[0.58]       | URI<br>[1.11]        | Urticaria<br>[0.88] | Hemog<br>[1.3]       | Epilepsy<br>[0.82]  | ASD<br>[1.0]         |
| Embu                       | Neonatal<br>[1.54] | Diarrhea<br>[1.68]   | Vit A<br>[0.83]      | Congenital<br>[1.31] | Iron<br>[0.28]       | URI<br>[1.11]        | Urticaria<br>[0.86] | Epilepsy<br>[0.91]   | ASD<br>[0.98]       | Hearing<br>[3.47]    |
| Garissa                    | Vit A<br>[1.22]    | Neonatal<br>[1.14]   | Congenital<br>[1.31] | Diarrhea<br>[0.85]   | Iron<br>[0.53]       | Hemog<br>[1.21]      | URI<br>[1.19]       | PEM<br>[0.33]        | Urticaria<br>[0.95] | Epilepsy<br>[0.73]   |
| HomaBay                    | Neonatal<br>[1.24] | Vit A<br>[0.7]       | Diarrhea<br>[1.57]   | Congenital<br>[1.48] | HIV<br>[56.21]       | PEM<br>[0.74]        | URI<br>[1.15]       | Epilepsy<br>[0.9]    | Urticaria<br>[0.92] | ASD<br>[1.03]        |
| Isiolo                     | Vit A<br>[0.88]    | Neonatal<br>[1.22]   | Diarrhea<br>[1.17]   | Congenital<br>[1.43] | PEM<br>[0.87]        | Iron<br>[0.21]       | URI<br>[1.17]       | Urticaria<br>[0.94]  | Hemog<br>[0.97]     | Epilepsy<br>[0.79]   |
| Kajiado                    | Neonatal<br>[1.56] | Vit A<br>[1.4]       | Iron<br>[0.88]       | Congenital<br>[1.3]  | Diarrhea<br>[1.18]   | URI<br>[1.11]        | Hemog<br>[1.59]     | Urticaria<br>[0.86]  | Epilepsy<br>[0.92]  | ASD<br>[0.98]        |
| Kakamega                   | Vit A<br>[1.46]    | Neonatal<br>[1.31]   | Diarrhea<br>[1.56]   | Congenital<br>[1.39] | Iron<br>[0.7]        | Hemog<br>[1.69]      | PEM<br>[0.66]       | URI<br>[1.13]        | Urticaria<br>[0.9]  | Epilepsy<br>[0.8]    |
| Kericho                    | Neonatal<br>[1.53] | Diarrhea<br>[1.63]   | Vit A<br>[0.85]      | Congenital<br>[1.27] | Iron<br>[0.23]       | URI<br>[1.11]        | Urticaria<br>[0.88] | Epilepsy<br>[0.8]    | ASD<br>[1.0]        | Hearing<br>[3.3]     |
| Kiambu                     | Neonatal<br>[1.63] | Diarrhea<br>[1.61]   | Congenital<br>[1.31] | Vit A<br>[0.67]      | Iron<br>[0.34]       | URI<br>[1.09]        | Epilepsy<br>[0.99]  | Urticaria<br>[0.84]  | ASD<br>[0.95]       | Hearing<br>[3.74]    |
| Kilifi                     | Neonatal<br>[1.31] | Vit A<br>[1.04]      | Diarrhea<br>[1.39]   | Congenital<br>[1.37] | Iron<br>[0.65]       | URI<br>[1.13]        | Hemog<br>[1.22]     | Urticaria<br>[0.9]   | ASD<br>[1.02]       | Epilepsy<br>[0.76]   |

**eFigure 9b. Leading ten causes of YLDs with the ratio of observed YLDs to YLDs expected on the basis of Socio-Demographic Index alone in 2017, <1 years, both sexes combined.**  
The top ten causes contributing to YLDs are listed globally, by socio-demographic quintile, and then by GBD superregion, region, country, and subnationally where modeled. For each cell, the ratio of observed YLDs to YLDs expected on the basis of socio-demographic index (SDI) alone are listed. Abbreviations: YLD=year of life lived with disability, GBD=Global Burden of Disease.

Values shown in brackets represent the ratio of observed YLDs to predicted YLDs on the basis of Socio-Demographic Index (SDI), rounded to two (2) digits. Color ranges (shown below) were calculated to place a roughly equal number of cells into each bin.

| COLOR KEY:   |                    | [0.0-0.68]           | [0.68-0.82]          | [0.82-0.91]          | [0.91-1.01]          | [1.01-1.1]          | [1.1-1.21]          | [1.21-1.45]         | [1.45-2.25]         | 2.25+               |
|--------------|--------------------|----------------------|----------------------|----------------------|----------------------|---------------------|---------------------|---------------------|---------------------|---------------------|
|              | 1                  | 2                    | 3                    | 4                    | 5                    | 6                   | 7                   | 8                   | 9                   | 10                  |
| Kirinyaga    | Neonatal<br>[1.59] | Diarrhea<br>[1.89]   | Congenital<br>[1.33] | Vit A<br>[0.37]      | URI<br>[1.12]        | Urticaria<br>[0.86] | Epilepsy<br>[0.89]  | ASD<br>[0.99]       | PEM<br>[0.76]       | Hearing<br>[3.49]   |
| Kisii        | Neonatal<br>[1.39] | Vit A<br>[1.26]      | Diarrhea<br>[1.75]   | Congenital<br>[1.35] | Iron<br>[0.32]       | URI<br>[1.11]       | PEM<br>[0.79]       | Urticaria<br>[0.87] | Epilepsy<br>[0.83]  | Hemog<br>[1.35]     |
| Kisumu       | Vit A<br>[2.34]    | Neonatal<br>[1.33]   | Diarrhea<br>[1.29]   | Congenital<br>[1.44] | Iron<br>[0.75]       | Hemog<br>[3.3]      | URI<br>[1.1]        | HIV<br>[58.63]      | Epilepsy<br>[1.0]   | Urticaria<br>[0.87] |
| Kitui        | Neonatal<br>[1.41] | Vit A<br>[0.87]      | Diarrhea<br>[1.37]   | Congenital<br>[1.32] | Iron<br>[0.31]       | URI<br>[1.13]       | Urticaria<br>[0.9]  | Epilepsy<br>[0.8]   | ASD<br>[1.01]       | PEM<br>[0.42]       |
| Kwale        | Vit A<br>[1.33]    | Neonatal<br>[1.36]   | Iron<br>[0.8]        | Diarrhea<br>[1.17]   | Congenital<br>[1.34] | URI<br>[1.13]       | Hemog<br>[1.49]     | Urticaria<br>[0.89] | Malaria<br>[16.01]  | Epilepsy<br>[0.82]  |
| Laikipia     | Neonatal<br>[1.59] | Diarrhea<br>[1.65]   | Vit A<br>[0.84]      | Congenital<br>[1.27] | URI<br>[1.11]        | Urticaria<br>[0.86] | Epilepsy<br>[0.88]  | ASD<br>[0.98]       | HIV<br>[47.83]      | Iron<br>[0.12]      |
| Lamu         | Vit A<br>[1.16]    | Neonatal<br>[1.33]   | Diarrhea<br>[1.42]   | Congenital<br>[1.38] | Iron<br>[0.25]       | URI<br>[1.13]       | Epilepsy<br>[0.93]  | Urticaria<br>[0.9]  | Hemog<br>[1.16]     | ASD<br>[1.02]       |
| Machakos     | Neonatal<br>[1.48] | Vit A<br>[1.06]      | Diarrhea<br>[1.8]    | Congenital<br>[1.3]  | Iron<br>[0.66]       | URI<br>[1.11]       | PEM<br>[0.77]       | Urticaria<br>[0.86] | Epilepsy<br>[0.87]  | ASD<br>[0.99]       |
| Makueni      | Neonatal<br>[1.38] | Congenital<br>[1.33] | Diarrhea<br>[1.09]   | Vit A<br>[0.53]      | URI<br>[1.13]        | HIV<br>[50.23]      | Urticaria<br>[0.89] | Epilepsy<br>[0.82]  | ASD<br>[1.02]       | Hearing<br>[3.16]   |
| Mandera      | Vit A<br>[0.68]    | Neonatal<br>[1.05]   | Congenital<br>[1.27] | Diarrhea<br>[0.8]    | Iron<br>[0.41]       | PEM<br>[0.61]       | URI<br>[1.2]        | Urticaria<br>[0.96] | Hemog<br>[0.73]     | ASD<br>[1.03]       |
| Marsabit     | Neonatal<br>[1.2]  | Vit A<br>[0.56]      | PEM<br>[1.67]        | Diarrhea<br>[1.09]   | Congenital<br>[1.33] | URI<br>[1.19]       | Urticaria<br>[0.96] | ASD<br>[1.05]       | Epilepsy<br>[0.71]  | Iron<br>[0.09]      |
| Meru         | Neonatal<br>[1.59] | Vit A<br>[1.07]      | Diarrhea<br>[1.85]   | Congenital<br>[1.32] | URI<br>[1.11]        | Urticaria<br>[0.87] | Epilepsy<br>[0.88]  | ASD<br>[1.0]        | Iron<br>[0.12]      | Hemog<br>[0.96]     |
| Migori       | Vit A<br>[1.5]     | Neonatal<br>[1.21]   | Diarrhea<br>[1.46]   | Congenital<br>[1.46] | Iron<br>[0.28]       | HIV<br>[43.74]      | PEM<br>[0.64]       | Hemog<br>[1.59]     | URI<br>[1.14]       | Urticaria<br>[0.91] |
| Mombasa      | Neonatal<br>[1.51] | Vit A<br>[1.45]      | Iron<br>[1.46]       | Diarrhea<br>[1.77]   | Congenital<br>[1.32] | URI<br>[1.09]       | Hemog<br>[1.98]     | Epilepsy<br>[1.0]   | Urticaria<br>[0.85] | ASD<br>[0.95]       |
| Murang'a     | Neonatal<br>[1.56] | Congenital<br>[1.31] | Diarrhea<br>[1.19]   | Vit A<br>[0.32]      | URI<br>[1.2]         | Urticaria<br>[0.87] | Epilepsy<br>[0.87]  | ASD<br>[0.99]       | Hearing<br>[3.43]   | PEM<br>[0.5]        |
| Nairobi      | Neonatal<br>[1.78] | Congenital<br>[1.22] | Diarrhea<br>[1.47]   | Vit A<br>[1.04]      | URI<br>[1.02]        | Epilepsy<br>[1.24]  | Urticaria<br>[0.86] | ASD<br>[0.86]       | Iron<br>[0.27]      | Hearing<br>[4.42]   |
| Nakuru       | Neonatal<br>[1.84] | Diarrhea<br>[1.68]   | Vit A<br>[0.77]      | Congenital<br>[1.32] | Epilepsy<br>[1.67]   | URI<br>[1.11]       | Iron<br>[0.23]      | Urticaria<br>[0.86] | ASD<br>[0.98]       | Oth Neuro<br>[2.36] |
| Nandi        | Neonatal<br>[1.44] | Vit A<br>[1.15]      | Diarrhea<br>[1.36]   | Congenital<br>[1.3]  | Iron<br>[1.12]       | PEM<br>[0.7]        | URI<br>[0.15]       | Urticaria<br>[0.88] | Epilepsy<br>[0.83]  | ASD<br>[1.0]        |
| Narok        | Vit A<br>[1.23]    | Neonatal<br>[1.3]    | Diarrhea<br>[0.98]   | Congenital<br>[1.3]  | Iron<br>[0.39]       | URI<br>[1.16]       | Hemog<br>[1.21]     | Urticaria<br>[0.92] | Epilepsy<br>[0.79]  | ASD<br>[1.04]       |
| Nyamira      | Neonatal<br>[1.52] | Diarrhea<br>[1.66]   | Congenital<br>[1.34] | Vit A<br>[0.5]       | URI<br>[1.11]        | PEM<br>[1.13]       | Epilepsy<br>[0.98]  | Urticaria<br>[0.86] | ASD<br>[0.99]       | Hearing<br>[3.55]   |
| Nyandarua    | Neonatal<br>[1.66] | Diarrhea<br>[1.61]   | Congenital<br>[1.31] | Vit A<br>[0.52]      | PEM<br>[1.74]        | URI<br>[1.11]       | Epilepsy<br>[1.01]  | Urticaria<br>[0.86] | ASD<br>[0.99]       | Whooping<br>[1.56]  |
| Nyeri        | Neonatal<br>[1.61] | Diarrhea<br>[1.45]   | Congenital<br>[1.33] | URI<br>[1.11]        | Vit A<br>[0.22]      | Epilepsy<br>[1.05]  | Urticaria<br>[0.86] | ASD<br>[0.98]       | Hearing<br>[3.58]   | Whooping<br>[1.34]  |
| Samburu      | Neonatal<br>[1.13] | Vit A<br>[0.64]      | Diarrhea<br>[1.07]   | Congenital<br>[1.31] | PEM<br>[0.4]         | URI<br>[1.2]        | Urticaria<br>[0.97] | Iron<br>[0.1]       | ASD<br>[1.04]       | Hemog<br>[0.65]     |
| Siaya        | Vit A<br>[1.34]    | Neonatal<br>[1.26]   | Diarrhea<br>[1.51]   | Congenital<br>[1.4]  | Iron<br>[0.7]        | Malaria<br>[29.43]  | URI<br>[1.13]       | Hemog<br>[1.52]     | Urticaria<br>[0.89] | Epilepsy<br>[0.79]  |
| TaitaTaveta  | Neonatal<br>[1.48] | Diarrhea<br>[1.42]   | Congenital<br>[1.35] | Vit A<br>[0.58]      | URI<br>[1.12]        | Epilepsy<br>[0.99]  | Urticaria<br>[0.87] | ASD<br>[0.99]       | Hearing<br>[3.45]   | HIV<br>[35.18]      |
| TanaRiver    | Vit A<br>[1.19]    | Neonatal<br>[1.25]   | Diarrhea<br>[1.19]   | Iron<br>[0.72]       | Congenital<br>[1.36] | PEM<br>[0.85]       | Hemog<br>[1.39]     | URI<br>[1.16]       | Urticaria<br>[0.94] | Epilepsy<br>[0.78]  |
| TharakaNithi | Neonatal<br>[1.45] | Vit A<br>[1.23]      | Diarrhea<br>[2.0]    | Congenital<br>[1.4]  | URI<br>[1.11]        | Epilepsy<br>[1.02]  | Iron<br>[0.17]      | Urticaria<br>[0.86] | ASD<br>[0.99]       | Hemog<br>[1.24]     |
| TransNzoia   | Neonatal<br>[1.41] | Diarrhea<br>[1.68]   | Vit A<br>[0.62]      | Congenital<br>[1.31] | URI<br>[1.12]        | Urticaria<br>[0.88] | Epilepsy<br>[0.79]  | ASD<br>[1.0]        | Hearing<br>[3.26]   | HIV<br>[26.63]      |
| Turkana      | Vit A<br>[0.84]    | Neonatal<br>[1.09]   | PEM<br>[1.33]        | Diarrhea<br>[0.99]   | Congenital<br>[1.35] | Iron<br>[0.27]      | URI<br>[1.19]       | Hemog<br>[0.89]     | Urticaria<br>[0.96] | HIV<br>[9.91]       |
| UasinGishu   | Neonatal<br>[1.52] | Vit A<br>[1.03]      | Diarrhea<br>[1.7]    | Congenital<br>[1.28] | Iron<br>[0.42]       | URI<br>[1.11]       | Urticaria<br>[0.86] | Epilepsy<br>[0.85]  | ASD<br>[0.98]       | Hemog<br>[1.05]     |
| Vihiga       | Neonatal<br>[1.43] | Vit A<br>[0.87]      | Diarrhea<br>[1.31]   | Congenital<br>[1.35] | URI<br>[1.13]        | Iron<br>[0.15]      | Urticaria<br>[0.89] | Epilepsy<br>[0.85]  | ASD<br>[1.02]       | Malaria<br>[21.25]  |

**eFigure 9b. Leading ten causes of YLDs with the ratio of observed YLDs to YLDs expected on the basis of Socio-Demographic Index alone in 2017, <1 years, both sexes combined.**  
The top ten causes contributing to YLDs are listed globally, by socio-demographic quintile, and then by GBD superregion, region, country, and subnationally where modeled. For each cell, the ratio of observed YLDs to YLDs expected on the basis of socio-demographic index (SDI) alone are listed. Abbreviations: YLD=year of life lived with disability, GBD=Global Burden of Disease.

Values shown in brackets represent the ratio of observed YLDs to predicted YLDs on the basis of Socio-Demographic Index (SDI), rounded to two (2) digits. Color ranges (shown below) were calculated to place a roughly equal number of cells into each bin.

| COLOR KEY:                  |                    | [0.0-0.68]           | [0.68-0.82]          | [0.82-0.91]          | [0.91-1.01]          | [1.01-1.1]           | [1.1-1.21]          | [1.21-1.45]         | [1.45-2.25]          | 2.25+                |
|-----------------------------|--------------------|----------------------|----------------------|----------------------|----------------------|----------------------|---------------------|---------------------|----------------------|----------------------|
|                             | 1                  | 2                    | 3                    | 4                    | 5                    | 6                    | 7                   | 8                   | 9                    | 10                   |
| Wajir                       | Neonatal<br>[1.0]  | Vit A<br>[0.56]      | Diarrhea<br>[0.81]   | Congenital<br>[1.27] | PEM<br>[0.24]        | URI<br>[1.21]        | Iron<br>[0.12]      | Urticaria<br>[0.97] | ASD<br>[1.01]        | Hemog<br>[0.55]      |
| WestPokot                   | Vit A<br>[1.25]    | Neonatal<br>[1.22]   | Diarrhea<br>[1.34]   | Congenital<br>[1.34] | Iron<br>[0.43]       | URI<br>[1.16]        | Hemog<br>[1.24]     | PEM<br>[0.34]       | Urticaria<br>[0.93]  | ASD<br>[1.04]        |
| Madagascar                  | Neonatal<br>[1.34] | Iron<br>[1.1]        | Vit A<br>[0.56]      | Congenital<br>[1.92] | Diarrhea<br>[1.12]   | Epilepsy<br>[1.19]   | Hearing<br>[5.15]   | URI<br>[0.97]       | Urticaria<br>[0.94]  | Oth NTD<br>[0.7]     |
| Malawi                      | Iron<br>[1.86]     | Vit A<br>[0.98]      | Neonatal<br>[1.28]   | Diarrhea<br>[1.26]   | Congenital<br>[1.18] | Malaria<br>[3.66]    | Oth NTD<br>[1.17]   | HIV<br>[25.86]      | URI<br>[1.12]        | Epilepsy<br>[1.0]    |
| Mozambique                  | Vit A<br>[0.97]    | Neonatal<br>[1.35]   | Iron<br>[1.17]       | Congenital<br>[1.15] | Diarrhea<br>[0.65]   | Malaria<br>[4.45]    | HIV<br>[31.29]      | Epilepsy<br>[1.53]  | Oth NTD<br>[0.72]    | Urticaria<br>[0.94]  |
| Rwanda                      | Neonatal<br>[1.32] | Iron<br>[1.28]       | Vit A<br>[0.78]      | Diarrhea<br>[0.88]   | Congenital<br>[1.15] | Epilepsy<br>[1.17]   | URI<br>[0.98]       | Oth NTD<br>[0.86]   | Urticaria<br>[0.91]  | PEM<br>[0.35]        |
| Somalia                     | Vit A<br>[0.83]    | Neonatal<br>[1.03]   | Iron<br>[0.92]       | PEM<br>[0.93]        | Diarrhea<br>[0.66]   | Congenital<br>[1.07] | Epilepsy<br>[0.84]  | URI<br>[1.0]        | Urticaria<br>[0.94]  | ASD<br>[0.99]        |
| S Sudan                     | Vit A<br>[0.81]    | Neonatal<br>[1.12]   | Iron<br>[1.11]       | Diarrhea<br>[1.19]   | PEM<br>[1.22]        | Congenital<br>[1.02] | Epilepsy<br>[1.0]   | Malaria<br>[1.07]   | URI<br>[0.99]        | Oth NTD<br>[0.7]     |
| Tanzania                    | Iron<br>[1.93]     | Neonatal<br>[1.35]   | Vit A<br>[0.78]      | Congenital<br>[1.01] | Diarrhea<br>[0.7]    | Hemog<br>[1.65]      | Oth NTD<br>[1.32]   | Epilepsy<br>[1.18]  | URI<br>[1.06]        | PEM<br>[0.4]         |
| Uganda                      | Neonatal<br>[1.37] | Iron<br>[0.97]       | Vit A<br>[0.57]      | Diarrhea<br>[0.96]   | Congenital<br>[1.07] | Malaria<br>[10.46]   | Epilepsy<br>[1.27]  | URI<br>[1.23]       | Hemog<br>[1.14]      | Urticaria<br>[0.92]  |
| Zambia                      | Neonatal<br>[1.51] | Vit A<br>[1.0]       | Iron<br>[1.07]       | Diarrhea<br>[1.13]   | Congenital<br>[1.13] | Epilepsy<br>[1.41]   | URI<br>[1.08]       | Malaria<br>[28.02]  | PEM<br>[0.61]        | HIV<br>[40.74]       |
| Southern Sub-Saharan Africa | Neonatal<br>[1.48] | Iron<br>[1.38]       | Vit A<br>[1.07]      | Congenital<br>[1.07] | Diarrhea<br>[0.93]   | URI<br>[0.94]        | Epilepsy<br>[1.06]  | Urticaria<br>[0.84] | ASD<br>[0.89]        | PEM<br>[2.8]         |
|                             | Neonatal<br>[1.56] | Iron<br>[2.14]       | Vit A<br>[1.26]      | Diarrhea<br>[1.15]   | Congenital<br>[0.82] | PEM<br>[10.71]       | URI<br>[0.92]       | Epilepsy<br>[1.12]  | Urticaria<br>[0.84]  | ASD<br>[0.86]        |
|                             | Neonatal<br>[1.26] | Vit A<br>[0.92]      | Iron<br>[0.82]       | Diarrhea<br>[1.07]   | Congenital<br>[0.97] | HIV<br>[83.66]       | URI<br>[1.0]        | Epilepsy<br>[0.96]  | Urticaria<br>[0.87]  | ASD<br>[1.0]         |
|                             | Iron<br>[2.97]     | Neonatal<br>[1.46]   | Diarrhea<br>[1.5]    | Congenital<br>[0.86] | Vit A<br>[0.62]      | PEM<br>[4.71]        | URI<br>[1.04]       | Epilepsy<br>[1.06]  | Oth NTD<br>[6.97]    | Urticaria<br>[0.82]  |
| Botswana                    | Neonatal<br>[1.55] | Congenital<br>[1.19] | Vit A<br>[1.0]       | Iron<br>[0.61]       | Diarrhea<br>[0.59]   | URI<br>[0.93]        | Epilepsy<br>[1.2]   | Urticaria<br>[0.87] | ASD<br>[0.86]        | PEM<br>[6.72]        |
| S Africa                    | Neonatal<br>[1.31] | Iron<br>[1.99]       | Diarrhea<br>[1.53]   | Vit A<br>[0.86]      | Congenital<br>[0.91] | HIV<br>[125.48]      | URI<br>[0.91]       | Epilepsy<br>[0.95]  | Urticaria<br>[0.83]  | ASD<br>[0.95]        |
| Swaziland                   | Iron<br>[1.44]     | Neonatal<br>[1.24]   | Vit A<br>[0.7]       | Diarrhea<br>[1.12]   | Congenital<br>[0.88] | URI<br>[1.0]         | Urticaria<br>[0.88] | Oth NTD<br>[1.14]   | Epilepsy<br>[0.76]   | ASD<br>[1.01]        |
| Zimbabwe                    | Iron<br>[2.0]      | Neonatal<br>[1.39]   | Vit A<br>[0.94]      | Diarrhea<br>[0.99]   | Congenital<br>[1.17] | PEM<br>[1.43]        | Hemog<br>[2.47]     | Malaria<br>[22.17]  | Oth NTD<br>[1.49]    | Epilepsy<br>[1.07]   |
| Western Sub-Saharan Africa  | Vit A<br>[0.98]    | Neonatal<br>[1.32]   | Iron<br>[0.82]       | Congenital<br>[1.05] | Diarrhea<br>[0.65]   | Malaria<br>[9.81]    | PEM<br>[0.65]       | Hemog<br>[1.59]     | Epilepsy<br>[1.17]   | Urticaria<br>[0.92]  |
|                             | Iron<br>[2.28]     | Vit A<br>[0.87]      | Neonatal<br>[1.15]   | PEM<br>[1.76]        | Diarrhea<br>[0.74]   | Congenital<br>[1.03] | Malaria<br>[2.89]   | Hemog<br>[1.98]     | Oth NTD<br>[1.39]    | Oth Un Inf<br>[2.13] |
|                             | Neonatal<br>[1.48] | Iron<br>[1.48]       | Vit A<br>[1.06]      | Diarrhea<br>[1.29]   | Congenital<br>[1.07] | Malaria<br>[56.49]   | Epilepsy<br>[1.31]  | Hemog<br>[1.84]     | URI<br>[0.97]        | PEM<br>[0.63]        |
|                             | Neonatal<br>[1.67] | Iron<br>[1.3]        | Congenital<br>[0.92] | Diarrhea<br>[0.74]   | Epilepsy<br>[1.23]   | Urticaria<br>[0.85]  | URI<br>[0.74]       | ASD<br>[0.97]       | Hemog<br>[1.07]      | Oth NTD<br>[1.37]    |
| Chad                        | Vit A<br>[0.72]    | Neonatal<br>[1.07]   | Iron<br>[1.12]       | Diarrhea<br>[1.27]   | PEM<br>[0.98]        | Congenital<br>[0.98] | Epilepsy<br>[0.97]  | Hemog<br>[0.76]     | Malaria<br>[0.86]    | URI<br>[0.91]        |
| Cote d'Ivoire               | Iron<br>[2.53]     | Vit A<br>[1.06]      | Neonatal<br>[1.39]   | Diarrhea<br>[1.01]   | Congenital<br>[1.06] | Hemog<br>[2.85]      | Oth NTD<br>[1.72]   | Epilepsy<br>[1.23]  | Oth Un Inf<br>[2.59] | Malaria<br>[8.92]    |
| Gambia                      | Iron<br>[1.89]     | Neonatal<br>[1.5]    | Vit A<br>[1.02]      | Diarrhea<br>[0.99]   | Congenital<br>[0.99] | PEM<br>[1.37]        | Hemog<br>[1.78]     | Oth NTD<br>[1.3]    | Oth Un Inf<br>[1.95] | Urticaria<br>[0.9]   |
| Ghana                       | Neonatal<br>[1.56] | Vit A<br>[1.66]      | Iron<br>[1.77]       | Diarrhea<br>[1.1]    | Congenital<br>[1.02] | PEM<br>[2.04]        | Epilepsy<br>[1.31]  | Malaria<br>[166.49] | Hemog<br>[2.12]      | Urticaria<br>[0.84]  |
| Guinea                      | Iron<br>[1.66]     | Neonatal<br>[1.22]   | Vit A<br>[0.68]      | Congenital<br>[1.06] | Diarrhea<br>[0.71]   | PEM<br>[0.67]        | Malaria<br>[3.73]   | Hemog<br>[2.01]     | Oth NTD<br>[1.02]    | Epilepsy<br>[1.0]    |
| Guinea-Bissau               | Vit A<br>[1.18]    | Neonatal<br>[1.35]   | Iron<br>[0.88]       | Congenital<br>[1.13] | Diarrhea<br>[0.78]   | Epilepsy<br>[1.1]    | PEM<br>[0.32]       | Urticaria<br>[0.93] | URI<br>[0.79]        | ASD<br>[1.04]        |
| Liberia                     | Neonatal<br>[1.39] | Iron<br>[1.34]       | Vit A<br>[0.49]      | Diarrhea<br>[1.03]   | Congenital<br>[1.09] | Hemog<br>[1.98]      | Epilepsy<br>[1.46]  | Malaria<br>[2.43]   | PEM<br>[0.37]        | Oth NTD<br>[0.82]    |
| Mali                        | Iron<br>[1.68]     | Vit A<br>[0.78]      | Neonatal<br>[1.07]   | Diarrhea<br>[0.68]   | Congenital<br>[1.0]  | PEM<br>[0.62]        | Malaria<br>[1.74]   | Hemog<br>[1.02]     | Oth NTD<br>[1.01]    | Oth Un Inf<br>[1.52] |

**eFigure 9b. Leading ten causes of YLDs with the ratio of observed YLDs to YLDs expected on the basis of Socio-Demographic Index alone in 2017, <1 years, both sexes combined.**  
 The top ten causes contributing to YLDs are listed globally, by socio-demographic quintile, and then by GBD superregion, region, country, and subnationally where modeled. For each cell, the ratio of observed YLDs to YLDs expected on the basis of socio-demographic index (SDI) alone are listed. Abbreviations: YLD=year of life lived with disability, GBD=Global Burden of Disease.

Values shown in brackets represent the ratio of observed YLDs to predicted YLDs on the basis of Socio-Demographic Index (SDI), rounded to two (2) digits. Color ranges (shown below) were calculated to place a roughly equal number of cells into each bin.

| COLOR KEY:        |                    | [0.0-0.68]         | [0.68-0.82]     | [0.82-0.91]          | [0.91-1.01]          | [1.01-1.1]           | [1.1-1.21]         | [1.21-1.45]        | [1.45-2.25]         | 2.25+                |
|-------------------|--------------------|--------------------|-----------------|----------------------|----------------------|----------------------|--------------------|--------------------|---------------------|----------------------|
|                   | 1                  | 2                  | 3               | 4                    | 5                    | 6                    | 7                  | 8                  | 9                   | 10                   |
| Mauritania        | PEM<br>[7.56]      | Neonatal<br>[1.57] | Iron<br>[1.52]  | Vit A<br>[0.76]      | Diarrhea<br>[1.02]   | Congenital<br>[0.98] | Epilepsy<br>[1.24] | Oth NTD<br>[1.25]  | Urticaria<br>[0.87] | Hemog<br>[1.18]      |
| Niger             | Vit A<br>[0.79]    | Neonatal<br>[0.92] | Iron<br>[0.78]  | PEM<br>[0.84]        | Diarrhea<br>[0.68]   | Congenital<br>[0.92] | Malaria<br>[1.69]  | Hemog<br>[1.05]    | Epilepsy<br>[0.68]  | Urticaria<br>[0.93]  |
| Nigeria           | Iron<br>[2.6]      | Neonatal<br>[1.44] | Vit A<br>[0.82] | Congenital<br>[1.29] | Diarrhea<br>[0.94]   | PEM<br>[1.67]        | Hemog<br>[3.28]    | Malaria<br>[71.61] | Oth NTD<br>[2.24]   | Epilepsy<br>[1.07]   |
| Sao Tome Principe | Neonatal<br>[1.49] | Vit A<br>[1.32]    | Iron<br>[0.97]  | Diarrhea<br>[1.0]    | Congenital<br>[1.02] | PEM<br>[0.97]        | Hemog<br>[1.86]    | Epilepsy<br>[1.21] | Urticaria<br>[0.86] | URI<br>[0.78]        |
| Senegal           | Iron<br>[1.75]     | Neonatal<br>[1.39] | Vit A<br>[0.82] | Diarrhea<br>[1.08]   | Congenital<br>[1.02] | PEM<br>[0.45]        | Hemog<br>[1.38]    | Oth NTD<br>[1.12]  | Epilepsy<br>[1.07]  | Oth Un Inf<br>[1.84] |
| Sierra Leone      | Iron<br>[2.05]     | Neonatal<br>[1.33] | Vit A<br>[0.79] | Congenital<br>[1.05] | Malaria<br>[8.96]    | Diarrhea<br>[0.66]   | Hemog<br>[2.92]    | PEM<br>[0.67]      | Oth NTD<br>[1.26]   | Epilepsy<br>[1.29]   |
| Togo              | Iron<br>[1.93]     | Neonatal<br>[1.51] | Vit A<br>[0.96] | Diarrhea<br>[1.13]   | Congenital<br>[1.06] | Malaria<br>[29.5]    | Hemog<br>[2.33]    | PEM<br>[0.81]      | Epilepsy<br>[1.3]   | Oth NTD<br>[1.35]    |

**eFigure 9c. Leading ten causes of YLDs with the ratio of observed YLDs to YLDs expected on the basis of Socio-Demographic Index alone in 2017, 1-4 years, both sexes combined.** The top ten causes contributing to YLDs are listed globally, by socio-demographic quintile, and then by GBD superregion, region, country, and subnationally where modeled. For each cell, the ratio of observed YLDs to YLDs expected on the basis of socio-demographic index (SDI) alone are listed. Abbreviations: YLD=year of life lived with disability, GBD=Global Burden of Disease.

Values shown in brackets represent the ratio of observed YLDs to predicted YLDs on the basis of Socio-Demographic Index (SDI), rounded to two (2) digits. Color ranges (shown below) were calculated to place a roughly equal number of cells into each bin.

| COLOR KEY:                                       |                      | [0.0-0.72]           | [0.72-0.84]          | [0.84-0.92]          | [0.92-1.01]          | [1.01-1.09]          | [1.09-1.17]          | [1.17-1.32]            | [1.32-1.67]            | 1.67+                  |
|--------------------------------------------------|----------------------|----------------------|----------------------|----------------------|----------------------|----------------------|----------------------|------------------------|------------------------|------------------------|
|                                                  | 1                    | 2                    | 3                    | 4                    | 5                    | 6                    | 7                    | 8                      | 9                      | 10                     |
| Global                                           | Neonatal<br>[1.13]   | Iron<br>[2.88]       | Vit A<br>[1.51]      | Dermatitis<br>[0.74] | Diarrhea<br>[1.2]    | Asthma<br>[0.7]      | Congenital<br>[0.97] | PEM<br>[127.58]        | Urticaria<br>[0.88]    | Skin Viral<br>[0.86]   |
| Low SDI                                          | Iron<br>[1.16]       | Neonatal<br>[1.29]   | Vit A<br>[0.84]      | Diarrhea<br>[0.85]   | Dermatitis<br>[0.81] | PEM<br>[3.4]         | Congenital<br>[1.04] | Asthma<br>[0.6]        | Urticaria<br>[0.91]    | Epilepsy<br>[0.93]     |
| Low-middle SDI                                   | Iron<br>[1.65]       | Neonatal<br>[1.14]   | Vit A<br>[1.03]      | Diarrhea<br>[1.07]   | Dermatitis<br>[0.73] | PEM<br>[17.92]       | Congenital<br>[1.04] | Asthma<br>[0.6]        | Urticaria<br>[0.89]    | Skin Viral<br>[0.87]   |
| Middle SDI                                       | Neonatal<br>[1.18]   | Dermatitis<br>[0.69] | Asthma<br>[0.86]     | Iron<br>[1.37]       | Diarrhea<br>[1.04]   | Vit A<br>[0.92]      | Congenital<br>[0.88] | PEM<br>[114.95]        | Urticaria<br>[0.9]     | Skin Viral<br>[0.89]   |
| High-middle SDI                                  | Neonatal<br>[1.43]   | Dermatitis<br>[0.57] | Diarrhea<br>[1.92]   | Asthma<br>[1.03]     | Congenital<br>[0.92] | Urticaria<br>[1.35]  | Skin Viral<br>[0.97] | Vit A<br>[2.61]        | URI<br>[0.75]          | Iron<br>[6.47]         |
| High SDI                                         | Dermatitis<br>[1.32] | Neonatal<br>[0.86]   | Asthma<br>[0.91]     | Congenital<br>[0.88] | URI<br>[1.18]        | Skin Viral<br>[0.9]  | Diarrhea<br>[0.73]   | Urticaria<br>[0.74]    | ASD<br>[1.15]          | Epilepsy<br>[0.8]      |
| Central Europe, Eastern Europe, and Central Asia | Neonatal<br>[1.35]   | Dermatitis<br>[0.54] | Diarrhea<br>[1.29]   | Congenital<br>[1.03] | Iron<br>[3.69]       | Urticaria<br>[1.2]   | Skin Viral<br>[0.83] | Vit A<br>[1.16]        | Asthma<br>[0.47]       | Hernia<br>[2.46]       |
| Central Asia                                     | Neonatal<br>[0.97]   | Iron<br>[2.76]       | Vit A<br>[1.26]      | Dermatitis<br>[0.49] | Congenital<br>[1.01] | Urticaria<br>[1.02]  | Diarrhea<br>[0.69]   | Skin Viral<br>[0.83]   | Hernia<br>[2.89]       | Asthma<br>[0.43]       |
| Armenia                                          | Iron<br>[5.43]       | Neonatal<br>[0.97]   | Dermatitis<br>[0.48] | Diarrhea<br>[1.05]   | Congenital<br>[1.0]  | Urticaria<br>[1.05]  | Skin Viral<br>[0.83] | Hernia<br>[2.77]       | Asthma<br>[0.42]       | Epilepsy<br>[1.06]     |
| Azerbaijan                                       | Neonatal<br>[0.99]   | Iron<br>[1.86]       | Dermatitis<br>[0.88] | Congenital<br>[0.98] | Diarrhea<br>[0.85]   | Urticaria<br>[1.06]  | Vit A<br>[0.88]      | Skin Viral<br>[0.83]   | Asthma<br>[0.42]       | Epilepsy<br>[1.2]      |
| Georgia                                          | Neonatal<br>[0.96]   | Congenital<br>[1.02] | Dermatitis<br>[0.44] | Diarrhea<br>[0.98]   | Urticaria<br>[1.06]  | Vit A<br>[0.83]      | Skin Viral<br>[0.83] | Epilepsy<br>[1.12]     | Asthma<br>[0.39]       | Iron<br>[0.8]          |
| Kazakhstan                                       | Neonatal<br>[1.05]   | Vit A<br>[2.49]      | Congenital<br>[1.04] | Dermatitis<br>[0.45] | Urticaria<br>[1.12]  | Diarrhea<br>[0.77]   | Skin Viral<br>[0.83] | Epilepsy<br>[1.33]     | Asthma<br>[0.37]       | Blindness<br>[1.3]     |
| Kyrgyzstan                                       | Neonatal<br>[0.98]   | Iron<br>[2.03]       | Vit A<br>[0.92]      | Hernia<br>[6.25]     | Dermatitis<br>[0.54] | Congenital<br>[1.04] | Urticaria<br>[0.96]  | Asthma<br>[0.46]       | Skin Viral<br>[0.86]   | Diarrhea<br>[0.48]     |
| Mongolia                                         | Neonatal<br>[1.0]    | Vit A<br>[1.44]      | Diarrhea<br>[1.03]   | Dermatitis<br>[0.5]  | Congenital<br>[1.04] | Urticaria<br>[1.01]  | Iron<br>[0.97]       | Skin Viral<br>[0.84]   | Asthma<br>[0.42]       | Epilepsy<br>[1.13]     |
| Tajikistan                                       | Neonatal<br>[1.01]   | Iron<br>[0.75]       | Vit A<br>[0.58]      | Diarrhea<br>[0.86]   | Congenital<br>[1.05] | Dermatitis<br>[0.56] | Urticaria<br>[0.97]  | Hernia<br>[4.54]       | PEM<br>[7.88]          | Skin Viral<br>[0.89]   |
| Turkmenistan                                     | Neonatal<br>[0.92]   | Dermatitis<br>[0.48] | Congenital<br>[1.01] | Iron<br>[1.48]       | Urticaria<br>[1.05]  | Vit A<br>[0.72]      | Skin Viral<br>[0.83] | Asthma<br>[0.42]       | Epilepsy<br>[1.14]     | Hernia<br>[2.07]       |
| Uzbekistan                                       | Iron<br>[3.11]       | Neonatal<br>[0.92]   | Vit A<br>[0.98]      | Dermatitis<br>[0.51] | Congenital<br>[1.0]  | Urticaria<br>[0.97]  | Asthma<br>[0.48]     | Hernia<br>[3.06]       | Skin Viral<br>[0.84]   | Epilepsy<br>[1.02]     |
| Central Europe                                   | Neonatal<br>[1.41]   | Diarrhea<br>[1.99]   | Dermatitis<br>[0.59] | Congenital<br>[1.17] | Urticaria<br>[1.31]  | Asthma<br>[0.58]     | Vit A<br>[2.15]      | Skin Viral<br>[0.85]   | Hernia<br>[2.94]       | Falls<br>[1.83]        |
| Albania                                          | Neonatal<br>[1.18]   | Diarrhea<br>[1.13]   | Congenital<br>[1.1]  | Dermatitis<br>[0.46] | Urticaria<br>[1.03]  | Vit A<br>[0.81]      | Hernia<br>[3.63]     | Iron<br>[1.06]         | PEM<br>[197.39]        | Skin Viral<br>[0.82]   |
| Bosnia                                           | Neonatal<br>[1.26]   | Dermatitis<br>[0.55] | Congenital<br>[1.11] | Diarrhea<br>[1.17]   | Vit A<br>[1.3]       | Urticaria<br>[1.08]  | Hernia<br>[3.61]     | Asthma<br>[0.53]       | Skin Viral<br>[0.83]   | Falls<br>[2.86]        |
| Bulgaria                                         | Neonatal<br>[1.25]   | Diarrhea<br>[1.76]   | Dermatitis<br>[0.49] | Congenital<br>[1.19] | Urticaria<br>[1.24]  | Vit A<br>[1.85]      | Skin Viral<br>[0.84] | Hernia<br>[2.98]       | Falls<br>[1.91]        | Asthma<br>[0.47]       |
| Croatia                                          | Neonatal<br>[1.53]   | Dermatitis<br>[0.51] | Diarrhea<br>[1.72]   | Congenital<br>[1.14] | Urticaria<br>[1.35]  | Hernia<br>[3.85]     | Skin Viral<br>[0.86] | Asthma<br>[0.56]       | Epilepsy<br>[1.1]      | ASD<br>[0.81]          |
| Czech                                            | Neonatal<br>[0.99]   | Diarrhea<br>[2.14]   | Dermatitis<br>[0.57] | Congenital<br>[1.16] | Urticaria<br>[1.44]  | Falls<br>[2.02]      | Hernia<br>[3.54]     | Skin Viral<br>[0.88]   | Asthma<br>[0.5]        | Vit A<br>[1.83]        |
| Hungary                                          | Neonatal<br>[1.35]   | Diarrhea<br>[2.83]   | Dermatitis<br>[0.68] | Congenital<br>[1.22] | Urticaria<br>[1.31]  | Skin Viral<br>[0.85] | Falls<br>[1.88]      | Asthma<br>[0.46]       | Hernia<br>[2.31]       | Vit A<br>[1.46]        |
| Macedonia                                        | Neonatal<br>[1.27]   | Diarrhea<br>[1.5]    | Vit A<br>[2.05]      | Dermatitis<br>[0.51] | Congenital<br>[1.09] | Urticaria<br>[1.15]  | Iron<br>[2.32]       | Hernia<br>[3.34]       | Asthma<br>[0.57]       | Skin Viral<br>[0.83]   |
| Montenegro                                       | Neonatal<br>[1.3]    | Dermatitis<br>[0.53] | Congenital<br>[1.11] | Urticaria<br>[1.24]  | Diarrhea<br>[0.95]   | Vit A<br>[1.75]      | Hernia<br>[3.23]     | Skin Viral<br>[0.84]   | Asthma<br>[0.51]       | Falls<br>[2.01]        |
| Poland                                           | Neonatal<br>[1.6]    | Dermatitis<br>[0.66] | Diarrhea<br>[1.98]   | Congenital<br>[1.17] | Urticaria<br>[1.42]  | Asthma<br>[0.76]     | Skin Viral<br>[0.87] | Upper Digest<br>[5.85] | Falls<br>[1.64]        | Vit A<br>[2.35]        |
| Romania                                          | Neonatal<br>[1.42]   | Diarrhea<br>[2.26]   | Dermatitis<br>[0.56] | Congenital<br>[1.16] | Urticaria<br>[4.98]  | Vit A<br>[2.16]      | Urticaria<br>[1.2]   | Asthma<br>[0.61]       | Skin Viral<br>[0.84]   | Upper Digest<br>[5.25] |
| Serbia                                           | Neonatal<br>[1.61]   | Dermatitis<br>[0.54] | Congenital<br>[1.18] | Diarrhea<br>[1.26]   | Vit A<br>[1.4]       | Urticaria<br>[1.15]  | Hernia<br>[3.5]      | Skin Viral<br>[0.83]   | Falls<br>[2.33]        | Asthma<br>[0.38]       |
| Slovakia                                         | Neonatal<br>[1.09]   | Diarrhea<br>[2.38]   | Dermatitis<br>[0.56] | Congenital<br>[1.24] | Urticaria<br>[1.4]   | Hernia<br>[3.83]     | Skin Viral<br>[0.87] | Falls<br>[1.68]        | Upper Digest<br>[5.11] | Asthma<br>[0.45]       |
| Slovenia                                         | Neonatal<br>[1.16]   | Diarrhea<br>[2.4]    | Dermatitis<br>[0.51] | Congenital<br>[1.22] | Urticaria<br>[1.48]  | Asthma<br>[0.7]      | Falls<br>[1.88]      | Hernia<br>[3.22]       | Skin Viral<br>[0.89]   | Vit A<br>[2.11]        |

**eFigure 9c. Leading ten causes of YLDs with the ratio of observed YLDs to YLDs expected on the basis of Socio-Demographic Index alone in 2017, 1-4 years, both sexes combined.**  
The top ten causes contributing to YLDs are listed globally, by socio-demographic quintile, and then by GBD superregion, region, country, and subnationally where modeled. For each cell, the ratio of observed YLDs to YLDs expected on the basis of socio-demographic index (SDI) alone are listed. Abbreviations: YLD=year of life lived with disability, GBD=Global Burden of Disease.

Values shown in brackets represent the ratio of observed YLDs to predicted YLDs on the basis of Socio-Demographic Index (SDI), rounded to two (2) digits. Color ranges (shown below) were calculated to place a roughly equal number of cells into each bin.

| COLOR KEY:                      |                      | [0.0-0.72]           | [0.72-0.84]          | [0.84-0.92]          | [0.92-1.01]            | [1.01-1.09]            | [1.09-1.17]            | [1.17-1.32]            | [1.32-1.67]          | 1.67+               |
|---------------------------------|----------------------|----------------------|----------------------|----------------------|------------------------|------------------------|------------------------|------------------------|----------------------|---------------------|
|                                 | 1                    | 2                    | 3                    | 4                    | 5                      | 6                      | 7                      | 8                      | 9                    | 10                  |
| <b>Eastern Europe</b>           | Neonatal<br>[1.61]   | Dermatitis<br>[0.57] | Diarrhea<br>[1.49]   | Congenital<br>[0.99] | Urticaria<br>[1.28]    | Upper Digest<br>[5.47] | Skin Viral<br>[0.84]   | Iron<br>[2.83]         | Asthma<br>[0.44]     | Falls<br>[1.64]     |
| Belarus                         | Neonatal<br>[1.53]   | Dermatitis<br>[0.62] | Congenital<br>[0.97] | Urticaria<br>[1.21]  | Diarrhea<br>[0.94]     | Asthma<br>[0.57]       | Skin Viral<br>[0.84]   | Upper Digest<br>[5.17] | Hernia<br>[2.14]     | Falls<br>[1.64]     |
| Estonia                         | Neonatal<br>[1.7]    | Dermatitis<br>[0.79] | Diarrhea<br>[2.52]   | Congenital<br>[1.03] | Urticaria<br>[1.49]    | Skin Viral<br>[0.89]   | Upper Digest<br>[6.24] | Falls<br>[1.26]        | Asthma<br>[0.42]     | Hernia<br>[1.92]    |
| Latvia                          | Neonatal<br>[1.51]   | Diarrhea<br>[2.33]   | Dermatitis<br>[0.58] | Congenital<br>[0.95] | Urticaria<br>[1.35]    | Asthma<br>[0.59]       | Skin Viral<br>[0.87]   | Upper Digest<br>[5.32] | Falls<br>[1.44]      | Hernia<br>[2.1]     |
| Lithuania                       | Neonatal<br>[1.74]   | Diarrhea<br>[2.53]   | Congenital<br>[1.1]  | Dermatitis<br>[0.36] | Urticaria<br>[1.41]    | Upper Digest<br>[6.54] | Skin Viral<br>[0.88]   | Asthma<br>[0.5]        | Falls<br>[1.33]      | Hernia<br>[2.11]    |
| Moldova                         | Neonatal<br>[1.55]   | Dermatitis<br>[0.68] | Diarrhea<br>[0.96]   | Congenital<br>[0.96] | Iron<br>[1.3]          | Upper Digest<br>[5.6]  | Urticaria<br>[1.02]    | Hernia<br>[3.27]       | Skin Viral<br>[0.83] | Asthma<br>[0.41]    |
| Russian Federation              | Neonatal<br>[1.62]   | Dermatitis<br>[0.57] | Diarrhea<br>[1.72]   | Congenital<br>[0.98] | Urticaria<br>[1.29]    | Upper Digest<br>[5.46] | Skin Viral<br>[0.84]   | Iron<br>[3.15]         | Asthma<br>[0.41]     | Falls<br>[1.64]     |
| Ukraine                         | Neonatal<br>[1.55]   | Dermatitis<br>[0.59] | Congenital<br>[1.02] | Urticaria<br>[1.18]  | Upper Digest<br>[5.15] | Asthma<br>[0.5]        | Skin Viral<br>[0.83]   | Iron<br>[1.61]         | Diarrhea<br>[0.64]   | Hernia<br>[2.5]     |
| <b>High-income</b>              | Dermatitis<br>[1.31] | Neonatal<br>[0.94]   | Asthma<br>[1.12]     | Congenital<br>[0.94] | URI<br>[1.16]          | Diarrhea<br>[1.14]     | Skin Viral<br>[0.96]   | ASD<br>[1.15]          | Urticaria<br>[0.91]  | Epilepsy<br>[1.06]  |
| <b>Australasia</b>              | Dermatitis<br>[1.14] | Asthma<br>[2.1]      | Neonatal<br>[0.92]   | Falls<br>[2.11]      | Skin Viral<br>[1.0]    | Congenital<br>[0.78]   | URI<br>[1.02]          | Urticaria<br>[1.26]    | ASD<br>[1.03]        | Diarrhea<br>[0.65]  |
| Australia                       | Dermatitis<br>[1.08] | Asthma<br>[2.16]     | Neonatal<br>[0.9]    | Falls<br>[2.02]      | Skin Viral<br>[1.0]    | Congenital<br>[0.78]   | URI<br>[1.02]          | Urticaria<br>[1.27]    | ASD<br>[1.03]        | Diarrhea<br>[0.63]  |
| New Zealand                     | Dermatitis<br>[1.42] | Neonatal<br>[1.02]   | Asthma<br>[1.82]     | Falls<br>[2.67]      | Congenital<br>[0.78]   | URI<br>[1.04]          | Urticaria<br>[1.19]    | Skin Viral<br>[0.96]   | Diarrhea<br>[0.73]   | ASD<br>[1.02]       |
| <b>High-income Asia Pacific</b> | Dermatitis<br>[1.26] | Neonatal<br>[1.2]    | Asthma<br>[1.03]     | Congenital<br>[0.99] | Diarrhea<br>[1.21]     | URI<br>[1.03]          | Skin Viral<br>[0.99]   | Urticaria<br>[1.17]    | ASD<br>[1.28]        | Falls<br>[1.09]     |
| Brunei                          | Dermatitis<br>[1.2]  | Neonatal<br>[1.19]   | Asthma<br>[0.98]     | Diarrhea<br>[1.2]    | Iron<br>[9.85]         | Congenital<br>[0.81]   | Skin Viral<br>[0.98]   | URI<br>[1.02]          | Urticaria<br>[1.09]  | ASD<br>[1.19]       |
| Japan                           | Dermatitis<br>[1.32] | Neonatal<br>[1.18]   | Asthma<br>[1.02]     | Congenital<br>[1.09] | URI<br>[1.04]          | Skin Viral<br>[0.99]   | Diarrhea<br>[1.13]     | Urticaria<br>[1.17]    | ASD<br>[1.36]        | Falls<br>[1.14]     |
| Aichi                           | Dermatitis<br>[1.32] | Neonatal<br>[1.21]   | Asthma<br>[1.05]     | ASD<br>[2.01]        | Congenital<br>[1.02]   | Diarrhea<br>[1.22]     | URI<br>[1.04]          | Skin Viral<br>[1.0]    | Urticaria<br>[1.21]  | Falls<br>[1.1]      |
| Akita                           | Dermatitis<br>[1.33] | Neonatal<br>[1.25]   | Congenital<br>[1.14] | Asthma<br>[0.96]     | Diarrhea<br>[1.09]     | URI<br>[1.05]          | Skin Viral<br>[0.96]   | Urticaria<br>[1.06]    | ASD<br>[1.32]        | Endocrine<br>[3.49] |
| Aomori                          | Dermatitis<br>[1.33] | Neonatal<br>[1.16]   | Asthma<br>[0.95]     | Congenital<br>[0.93] | Diarrhea<br>[1.08]     | URI<br>[1.05]          | Skin Viral<br>[0.95]   | Urticaria<br>[1.05]    | ASD<br>[1.33]        | Endocrine<br>[3.52] |
| Chiba                           | Dermatitis<br>[1.32] | Neonatal<br>[1.16]   | Asthma<br>[1.02]     | Congenital<br>[1.11] | URI<br>[1.04]          | Skin Viral<br>[0.98]   | Urticaria<br>[1.15]    | Diarrhea<br>[1.01]     | ASD<br>[1.34]        | Falls<br>[1.15]     |
| Ehime                           | Dermatitis<br>[1.32] | Neonatal<br>[0.96]   | Asthma<br>[0.96]     | Congenital<br>[1.0]  | URI<br>[1.05]          | Skin Viral<br>[0.96]   | Diarrhea<br>[0.98]     | Urticaria<br>[1.09]    | ASD<br>[1.35]        | Vit A<br>[2.22]     |
| Fukui                           | Dermatitis<br>[1.32] | Neonatal<br>[1.15]   | Asthma<br>[0.98]     | Congenital<br>[0.99] | Diarrhea<br>[1.26]     | URI<br>[1.04]          | Skin Viral<br>[0.97]   | Urticaria<br>[1.12]    | ASD<br>[1.35]        | Falls<br>[1.18]     |
| Fukuoka                         | Dermatitis<br>[1.32] | Neonatal<br>[1.14]   | Asthma<br>[1.0]      | Congenital<br>[1.04] | URI<br>[1.04]          | Skin Viral<br>[0.98]   | Diarrhea<br>[1.08]     | Urticaria<br>[1.14]    | ASD<br>[0.99]        | Endocrine<br>[3.72] |
| Fukushima                       | Dermatitis<br>[1.32] | Neonatal<br>[1.06]   | Congenital<br>[1.14] | Asthma<br>[0.95]     | Diarrhea<br>[1.14]     | URI<br>[1.05]          | Skin Viral<br>[0.95]   | Urticaria<br>[1.06]    | ASD<br>[1.34]        | Falls<br>[1.26]     |
| Gifu                            | Dermatitis<br>[1.32] | Neonatal<br>[1.19]   | Asthma<br>[0.99]     | Congenital<br>[0.89] | Diarrhea<br>[1.23]     | URI<br>[1.04]          | Skin Viral<br>[0.97]   | Urticaria<br>[1.12]    | ASD<br>[1.35]        | Endocrine<br>[3.83] |
| Gunma                           | Dermatitis<br>[1.32] | Neonatal<br>[1.12]   | Asthma<br>[0.99]     | Congenital<br>[1.04] | Diarrhea<br>[1.2]      | URI<br>[1.05]          | Skin Viral<br>[0.97]   | Urticaria<br>[1.12]    | ASD<br>[1.34]        | Endocrine<br>[4.01] |
| Hiroshima                       | Dermatitis<br>[1.32] | Neonatal<br>[1.22]   | Asthma<br>[1.02]     | Congenital<br>[0.98] | Diarrhea<br>[1.23]     | URI<br>[1.04]          | Skin Viral<br>[0.99]   | Urticaria<br>[1.17]    | ASD<br>[1.34]        | Falls<br>[1.12]     |
| Hokkaido                        | Dermatitis<br>[1.32] | Neonatal<br>[1.12]   | Asthma<br>[0.98]     | Congenital<br>[1.07] | Diarrhea<br>[1.17]     | URI<br>[1.04]          | Skin Viral<br>[0.96]   | Urticaria<br>[1.09]    | ASD<br>[1.34]        | Falls<br>[1.24]     |
| Hyogo                           | Dermatitis<br>[1.32] | Neonatal<br>[1.18]   | Asthma<br>[0.88]     | Congenital<br>[0.86] | Diarrhea<br>[1.2]      | URI<br>[1.05]          | Skin Viral<br>[0.98]   | Urticaria<br>[1.15]    | ASD<br>[1.35]        | Falls<br>[1.14]     |
| Ibaraki                         | Dermatitis<br>[1.32] | Neonatal<br>[1.21]   | Asthma<br>[1.0]      | Congenital<br>[1.14] | URI<br>[1.04]          | Skin Viral<br>[0.97]   | Urticaria<br>[1.12]    | Diarrhea<br>[0.93]     | ASD<br>[1.08]        | Falls<br>[1.18]     |
| Ishikawa                        | Dermatitis<br>[1.32] | Neonatal<br>[1.12]   | Asthma<br>[1.0]      | Congenital<br>[1.06] | Diarrhea<br>[1.18]     | URI<br>[1.04]          | Skin Viral<br>[0.98]   | Urticaria<br>[1.14]    | ASD<br>[1.34]        | Falls<br>[1.17]     |
| Iwate                           | Dermatitis<br>[1.33] | Neonatal<br>[1.2]    | Congenital<br>[1.12] | Asthma<br>[0.94]     | Diarrhea<br>[1.08]     | URI<br>[1.05]          | Skin Viral<br>[0.95]   | Urticaria<br>[1.05]    | ASD<br>[1.34]        | Falls<br>[1.29]     |

**eFigure 9c. Leading ten causes of YLDs with the ratio of observed YLDs to YLDs expected on the basis of Socio-Demographic Index alone in 2017, 1-4 years, both sexes combined.**  
The top ten causes contributing to YLDs are listed globally, by socio-demographic quintile, and then by GBD superregion, region, country, and subnationally where modeled. For each cell, the ratio of observed YLDs to YLDs expected on the basis of socio-demographic index (SDI) alone are listed. Abbreviations: YLD=year of life lived with disability, GBD=Global Burden of Disease.

Values shown in brackets represent the ratio of observed YLDs to predicted YLDs on the basis of Socio-Demographic Index (SDI), rounded to two (2) digits. Color ranges (shown below) were calculated to place a roughly equal number of cells into each bin.

| COLOR KEY: |                      | [0.0-0.72]           | [0.72-0.84]          | [0.84-0.92]          | [0.92-1.01]          | [1.01-1.09]          | [1.09-1.17]          | [1.17-1.32]         | [1.32-1.67]        | 1.67+               |
|------------|----------------------|----------------------|----------------------|----------------------|----------------------|----------------------|----------------------|---------------------|--------------------|---------------------|
|            | 1                    | 2                    | 3                    | 4                    | 5                    | 6                    | 7                    | 8                   | 9                  | 10                  |
| Kagawa     | Dermatitis<br>[1.32] | Neonatal<br>[1.11]   | Asthma<br>[0.98]     | Congenital<br>[1.04] | Diarrhea<br>[1.41]   | URI<br>[1.05]        | Skin Viral<br>[0.97] | Urticaria<br>[1.12] | ASD<br>[1.34]      | Falls<br>[1.17]     |
| Kagoshima  | Dermatitis<br>[1.33] | Neonatal<br>[0.99]   | Congenital<br>[1.18] | Asthma<br>[0.94]     | Diarrhea<br>[1.09]   | URI<br>[1.05]        | Skin Viral<br>[0.95] | Urticaria<br>[1.06] | ASD<br>[1.34]      | Falls<br>[1.26]     |
| Kanagawa   | Dermatitis<br>[1.32] | Neonatal<br>[1.23]   | Congenital<br>[1.22] | Asthma<br>[1.05]     | ASD<br>[1.62]        | URI<br>[1.04]        | Skin Viral<br>[1.0]  | Urticaria<br>[1.21] | Diarrhea<br>[0.96] | Falls<br>[1.12]     |
| Kochi      | Dermatitis<br>[1.32] | Neonatal<br>[1.06]   | Asthma<br>[0.93]     | Congenital<br>[1.01] | Diarrhea<br>[1.17]   | URI<br>[1.05]        | Skin Viral<br>[0.95] | Urticaria<br>[1.05] | ASD<br>[1.35]      | Endocrine<br>[3.37] |
| Kumamoto   | Dermatitis<br>[1.33] | Neonatal<br>[1.04]   | Asthma<br>[0.94]     | Congenital<br>[0.97] | Diarrhea<br>[1.05]   | URI<br>[1.05]        | Skin Viral<br>[0.95] | Urticaria<br>[1.06] | ASD<br>[1.34]      | Endocrine<br>[3.54] |
| Kyoto      | Neonatal<br>[1.23]   | Dermatitis<br>[1.09] | Congenital<br>[1.3]  | Asthma<br>[1.05]     | Diarrhea<br>[1.19]   | URI<br>[1.03]        | Skin Viral<br>[1.0]  | Urticaria<br>[1.21] | ASD<br>[1.35]      | Endocrine<br>[3.98] |
| Mie        | Dermatitis<br>[1.32] | Neonatal<br>[1.2]    | Asthma<br>[0.99]     | Diarrhea<br>[1.39]   | Congenital<br>[0.97] | URI<br>[1.04]        | Skin Viral<br>[0.98] | Urticaria<br>[1.14] | ASD<br>[1.34]      | Endocrine<br>[3.97] |
| Miyagi     | Dermatitis<br>[1.32] | Neonatal<br>[1.11]   | Congenital<br>[1.23] | Asthma<br>[0.83]     | Diarrhea<br>[1.1]    | URI<br>[1.05]        | Skin Viral<br>[0.97] | Urticaria<br>[1.12] | ASD<br>[1.34]      | Endocrine<br>[3.64] |
| Miyazaki   | Dermatitis<br>[1.33] | Neonatal<br>[1.03]   | Asthma<br>[0.94]     | Congenital<br>[1.06] | URI<br>[1.05]        | Skin Viral<br>[0.95] | Urticaria<br>[1.05]  | ASD<br>[1.33]       | Diarrhea<br>[0.84] | Falls<br>[1.29]     |
| Nagano     | Dermatitis<br>[1.32] | Neonatal<br>[1.22]   | Asthma<br>[0.99]     | Diarrhea<br>[1.45]   | Congenital<br>[1.0]  | URI<br>[1.05]        | Skin Viral<br>[0.97] | Urticaria<br>[1.12] | ASD<br>[1.34]      | Endocrine<br>[3.66] |
| Nagasaki   | Dermatitis<br>[1.33] | Neonatal<br>[1.04]   | Congenital<br>[1.26] | Asthma<br>[0.94]     | URI<br>[1.05]        | Skin Viral<br>[0.95] | Diarrhea<br>[0.94]   | Urticaria<br>[1.05] | ASD<br>[1.33]      | Endocrine<br>[3.57] |
| Nara       | Dermatitis<br>[1.32] | Neonatal<br>[1.04]   | Congenital<br>[1.28] | Asthma<br>[0.99]     | Diarrhea<br>[1.13]   | URI<br>[1.04]        | Skin Viral<br>[0.97] | Urticaria<br>[1.12] | ASD<br>[1.34]      | Falls<br>[1.19]     |
| Niigata    | Dermatitis<br>[1.32] | Neonatal<br>[1.17]   | Asthma<br>[0.98]     | Congenital<br>[1.11] | URI<br>[1.04]        | Skin Viral<br>[0.97] | Diarrhea<br>[1.05]   | Urticaria<br>[1.11] | ASD<br>[1.34]      | Falls<br>[1.22]     |
| Oita       | Dermatitis<br>[1.32] | Neonatal<br>[1.23]   | Asthma<br>[0.97]     | Congenital<br>[0.94] | Diarrhea<br>[1.19]   | URI<br>[1.05]        | Skin Viral<br>[0.96] | Urticaria<br>[1.1]  | ASD<br>[1.36]      | Falls<br>[1.2]      |
| Okayama    | Dermatitis<br>[1.32] | Neonatal<br>[1.23]   | Asthma<br>[1.0]      | Congenital<br>[0.94] | Diarrhea<br>[1.12]   | URI<br>[1.04]        | Skin Viral<br>[0.98] | Urticaria<br>[1.13] | ASD<br>[1.34]      | Falls<br>[1.16]     |
| Okinawa    | Dermatitis<br>[1.33] | Neonatal<br>[1.08]   | Asthma<br>[0.8]      | Congenital<br>[0.86] | URI<br>[1.06]        | Skin Viral<br>[0.95] | Urticaria<br>[1.04]  | Diarrhea<br>[0.88]  | ASD<br>[1.33]      | Falls<br>[1.34]     |
| Osaka      | Dermatitis<br>[1.32] | Neonatal<br>[1.11]   | Asthma<br>[1.04]     | Congenital<br>[1.15] | URI<br>[1.04]        | Skin Viral<br>[0.99] | Diarrhea<br>[1.09]   | Urticaria<br>[1.19] | ASD<br>[0.99]      | Endocrine<br>[3.81] |
| Saga       | Dermatitis<br>[1.33] | Neonatal<br>[1.09]   | Asthma<br>[0.96]     | Congenital<br>[0.97] | Diarrhea<br>[1.07]   | URI<br>[1.05]        | Skin Viral<br>[0.96] | Urticaria<br>[1.07] | ASD<br>[1.32]      | Falls<br>[1.25]     |
| Saitama    | Dermatitis<br>[1.32] | Neonatal<br>[1.14]   | Asthma<br>[0.99]     | Congenital<br>[0.95] | URI<br>[1.04]        | Diarrhea<br>[1.08]   | Skin Viral<br>[0.97] | Urticaria<br>[1.13] | ASD<br>[1.35]      | Endocrine<br>[3.93] |
| Shiga      | Dermatitis<br>[1.57] | Neonatal<br>[1.11]   | Asthma<br>[1.03]     | Congenital<br>[1.1]  | URI<br>[1.04]        | Diarrhea<br>[1.16]   | Skin Viral<br>[0.99] | Urticaria<br>[1.19] | ASD<br>[1.36]      | Endocrine<br>[3.86] |
| Shimane    | Dermatitis<br>[1.32] | Neonatal<br>[1.06]   | Asthma<br>[0.94]     | Congenital<br>[0.95] | Diarrhea<br>[1.14]   | URI<br>[1.05]        | Skin Viral<br>[0.95] | Urticaria<br>[1.06] | ASD<br>[1.35]      | Vit A<br>[1.7]      |
| Shizuoka   | Dermatitis<br>[1.32] | Neonatal<br>[1.28]   | Asthma<br>[1.01]     | Congenital<br>[0.99] | URI<br>[1.04]        | Diarrhea<br>[1.12]   | Skin Viral<br>[0.98] | Urticaria<br>[1.16] | ASD<br>[1.35]      | Endocrine<br>[3.73] |
| Tochigi    | Dermatitis<br>[1.32] | Neonatal<br>[1.23]   | Congenital<br>[1.41] | Asthma<br>[1.0]      | URI<br>[1.04]        | Skin Viral<br>[0.98] | Urticaria<br>[1.14]  | ASD<br>[1.34]       | Diarrhea<br>[0.95] | Falls<br>[1.17]     |
| Tokushima  | Dermatitis<br>[1.32] | Neonatal<br>[1.16]   | Asthma<br>[0.97]     | Congenital<br>[1.01] | Diarrhea<br>[1.18]   | URI<br>[1.04]        | Skin Viral<br>[0.97] | Urticaria<br>[1.11] | ASD<br>[1.34]      | Falls<br>[1.18]     |
| Tokyo      | Dermatitis<br>[1.33] | Neonatal<br>[1.31]   | Congenital<br>[1.33] | Asthma<br>[1.2]      | URI<br>[1.03]        | Skin Viral<br>[1.06] | Urticaria<br>[1.4]   | ASD<br>[1.36]       | Diarrhea<br>[1.2]  | Endocrine<br>[4.25] |
| Tottori    | Dermatitis<br>[1.32] | Neonatal<br>[1.16]   | Congenital<br>[1.14] | Asthma<br>[0.96]     | URI<br>[1.04]        | Skin Viral<br>[0.96] | Diarrhea<br>[1.0]    | Urticaria<br>[1.07] | ASD<br>[1.35]      | Endocrine<br>[3.8]  |
| Toyama     | Dermatitis<br>[1.32] | Neonatal<br>[1.13]   | Asthma<br>[1.01]     | Congenital<br>[1.02] | Diarrhea<br>[1.15]   | URI<br>[1.04]        | Skin Viral<br>[0.98] | Urticaria<br>[1.15] | ASD<br>[1.34]      | Falls<br>[1.14]     |
| Wakayama   | Dermatitis<br>[1.32] | Neonatal<br>[1.2]    | Asthma<br>[0.96]     | Congenital<br>[0.82] | URI<br>[1.05]        | Skin Viral<br>[0.96] | Diarrhea<br>[1.02]   | Urticaria<br>[1.09] | ASD<br>[1.35]      | Falls<br>[1.23]     |
| Yamagata   | Dermatitis<br>[1.33] | Neonatal<br>[0.99]   | Asthma<br>[0.95]     | Congenital<br>[0.97] | Diarrhea<br>[1.16]   | URI<br>[1.05]        | Skin Viral<br>[0.96] | Urticaria<br>[1.06] | ASD<br>[1.32]      | Falls<br>[1.29]     |
| Yamaguchi  | Dermatitis<br>[1.32] | Neonatal<br>[1.03]   | Asthma<br>[0.98]     | Congenital<br>[0.93] | Diarrhea<br>[1.23]   | URI<br>[1.04]        | Skin Viral<br>[0.97] | Urticaria<br>[1.12] | ASD<br>[1.35]      | Falls<br>[1.17]     |
| Yamanashi  | Dermatitis<br>[1.32] | Neonatal<br>[1.29]   | Asthma<br>[1.0]      | Congenital<br>[1.07] | URI<br>[1.04]        | Skin Viral<br>[0.98] | Diarrhea<br>[1.07]   | Urticaria<br>[1.14] | ASD<br>[1.32]      | Falls<br>[1.16]     |

**eFigure 9c. Leading ten causes of YLDs with the ratio of observed YLDs to YLDs expected on the basis of Socio-Demographic Index alone in 2017, 1-4 years, both sexes combined.**  
The top ten causes contributing to YLDs are listed globally, by socio-demographic quintile, and then by GBD superregion, region, country, and subnationally where modeled. For each cell, the ratio of observed YLDs to YLDs expected on the basis of socio-demographic index (SDI) alone are listed. Abbreviations: YLD=year of life lived with disability, GBD=Global Burden of Disease.

Values shown in brackets represent the ratio of observed YLDs to predicted YLDs on the basis of Socio-Demographic Index (SDI), rounded to two (2) digits. Color ranges (shown below) were calculated to place a roughly equal number of cells into each bin.

| COLOR KEY:                |                      | [0.0-0.72]           | [0.72-0.84]        | [0.84-0.92]          | [0.92-1.01]          | [1.01-1.09]          | [1.09-1.17]          | [1.17-1.32]          | [1.32-1.67]         | 1.67+               |
|---------------------------|----------------------|----------------------|--------------------|----------------------|----------------------|----------------------|----------------------|----------------------|---------------------|---------------------|
|                           | 1                    | 2                    | 3                  | 4                    | 5                    | 6                    | 7                    | 8                    | 9                   | 10                  |
| S Korea                   | Neonatal<br>[1.22]   | Dermatitis<br>[1.16] | Asthma<br>[1.03]   | Iron<br>[13.49]      | Diarrhea<br>[1.36]   | Congenital<br>[0.8]  | Skin Viral<br>[1.0]  | URI<br>[1.02]        | Urticaria<br>[1.14] | ASD<br>[1.1]        |
| Singapore                 | Neonatal<br>[1.21]   | Dermatitis<br>[1.1]  | Asthma<br>[1.03]   | Diarrhea<br>[1.31]   | Skin Viral<br>[1.0]  | URI<br>[1.02]        | Congenital<br>[0.69] | Urticaria<br>[1.14]  | ASD<br>[1.18]       | Falls<br>[1.1]      |
| High-income North America | Dermatitis<br>[1.61] | Neonatal<br>[0.94]   | Asthma<br>[1.46]   | Congenital<br>[0.9]  | URI<br>[1.16]        | Skin Viral<br>[0.97] | Urticaria<br>[1.16]  | ASD<br>[1.26]        | Diarrhea<br>[0.73]  | Psoriasis<br>[4.3]  |
| Canada                    | Dermatitis<br>[1.75] | Asthma<br>[1.7]      | Neonatal<br>[0.66] | URI<br>[1.18]        | Skin Viral<br>[1.1]  | ASD<br>[1.53]        | Congenital<br>[0.81] | Urticaria<br>[1.2]   | Diarrhea<br>[1.0]   | Psoriasis<br>[4.18] |
| Greenland                 | Dermatitis<br>[1.68] | Asthma<br>[1.37]     | Neonatal<br>[0.63] | URI<br>[1.23]        | Congenital<br>[0.79] | Skin Viral<br>[0.97] | Urticaria<br>[0.9]   | Diarrhea<br>[0.73]   | ASD<br>[1.31]       | Epilepsy<br>[0.9]   |
| USA                       | Dermatitis<br>[1.6]  | Neonatal<br>[0.96]   | Asthma<br>[1.42]   | Congenital<br>[0.9]  | URI<br>[1.16]        | Skin Viral<br>[0.95] | Urticaria<br>[1.14]  | ASD<br>[1.23]        | Diarrhea<br>[0.7]   | Psoriasis<br>[4.32] |
| Alabama                   | Dermatitis<br>[1.41] | Neonatal<br>[0.94]   | Asthma<br>[1.31]   | URI<br>[1.17]        | Skin Viral<br>[1.06] | Congenital<br>[0.72] | Urticaria<br>[0.93]  | Diarrhea<br>[0.71]   | Epilepsy<br>[1.22]  | ASD<br>[0.79]       |
| Alaska                    | Dermatitis<br>[1.45] | Neonatal<br>[0.89]   | Asthma<br>[1.06]   | Congenital<br>[0.98] | URI<br>[1.16]        | ASD<br>[1.15]        | Skin Viral<br>[0.72] | Urticaria<br>[0.91]  | Diarrhea<br>[0.78]  | Iron<br>[5.06]      |
| Arizona                   | Dermatitis<br>[1.67] | Neonatal<br>[0.94]   | Asthma<br>[1.36]   | Congenital<br>[0.88] | URI<br>[1.16]        | Urticaria<br>[1.08]  | ASD<br>[1.26]        | Skin Viral<br>[0.78] | Diarrhea<br>[0.68]  | Epilepsy<br>[1.08]  |
| Arkansas                  | Dermatitis<br>[1.29] | Neonatal<br>[0.82]   | Asthma<br>[0.96]   | URI<br>[1.17]        | Congenital<br>[0.75] | Skin Viral<br>[0.89] | ASD<br>[1.24]        | Urticaria<br>[0.81]  | Diarrhea<br>[0.67]  | Epilepsy<br>[1.09]  |
| California                | Dermatitis<br>[1.8]  | Neonatal<br>[0.82]   | Asthma<br>[1.4]    | URI<br>[1.16]        | Congenital<br>[0.84] | ASD<br>[1.41]        | Urticaria<br>[1.12]  | Skin Viral<br>[0.85] | Psoriasis<br>[4.45] | Diarrhea<br>[0.64]  |
| Colorado                  | Dermatitis<br>[1.46] | Neonatal<br>[0.97]   | Asthma<br>[1.27]   | Congenital<br>[0.93] | URI<br>[1.16]        | Urticaria<br>[1.14]  | Skin Viral<br>[0.73] | ASD<br>[1.08]        | Diarrhea<br>[0.69]  | Epilepsy<br>[1.17]  |
| Connecticut               | Dermatitis<br>[1.78] | Neonatal<br>[1.17]   | Asthma<br>[1.98]   | URI<br>[1.16]        | Congenital<br>[0.91] | Skin Viral<br>[1.14] | Urticaria<br>[1.44]  | ASD<br>[1.17]        | Diarrhea<br>[0.81]  | Psoriasis<br>[4.63] |
| Delaware                  | Dermatitis<br>[1.42] | Neonatal<br>[0.96]   | Asthma<br>[1.56]   | Congenital<br>[0.94] | URI<br>[1.16]        | Skin Viral<br>[1.1]  | Urticaria<br>[1.21]  | ASD<br>[1.15]        | Diarrhea<br>[0.77]  | Epilepsy<br>[1.52]  |
| DC                        | Dermatitis<br>[2.06] | Neonatal<br>[0.96]   | Asthma<br>[1.62]   | Congenital<br>[0.93] | URI<br>[1.15]        | Skin Viral<br>[1.12] | Urticaria<br>[1.2]   | ASD<br>[1.14]        | Diarrhea<br>[0.79]  | Psoriasis<br>[4.19] |
| Florida                   | Dermatitis<br>[1.6]  | Neonatal<br>[1.07]   | Asthma<br>[1.73]   | Skin Viral<br>[1.15] | Congenital<br>[0.89] | URI<br>[1.16]        | Urticaria<br>[1.21]  | Psoriasis<br>[5.41]  | Diarrhea<br>[0.69]  | Epilepsy<br>[1.28]  |
| Georgia                   | Dermatitis<br>[1.73] | Neonatal<br>[0.9]    | Asthma<br>[1.52]   | URI<br>[1.16]        | Congenital<br>[0.81] | Skin Viral<br>[1.03] | Urticaria<br>[1.04]  | ASD<br>[1.17]        | Diarrhea<br>[0.69]  | Psoriasis<br>[4.86] |
| Hawaii                    | Dermatitis<br>[1.83] | Neonatal<br>[0.87]   | Asthma<br>[1.64]   | Skin Viral<br>[1.13] | URI<br>[1.16]        | Congenital<br>[0.88] | Urticaria<br>[1.38]  | ASD<br>[1.16]        | Diarrhea<br>[0.72]  | Psoriasis<br>[4.36] |
| Idaho                     | Dermatitis<br>[1.35] | Neonatal<br>[0.78]   | Asthma<br>[0.79]   | URI<br>[1.17]        | Skin Viral<br>[1.04] | Congenital<br>[0.79] | ASD<br>[1.15]        | Urticaria<br>[0.82]  | Diarrhea<br>[0.69]  | Epilepsy<br>[0.96]  |
| Illinois                  | Dermatitis<br>[1.41] | Neonatal<br>[1.13]   | Asthma<br>[1.28]   | Congenital<br>[0.97] | URI<br>[1.15]        | Urticaria<br>[1.25]  | Skin Viral<br>[0.94] | ASD<br>[1.15]        | Diarrhea<br>[0.72]  | Epilepsy<br>[1.34]  |
| Indiana                   | Dermatitis<br>[1.37] | Neonatal<br>[0.92]   | Asthma<br>[1.33]   | Congenital<br>[0.98] | URI<br>[1.16]        | Skin Viral<br>[0.81] | Urticaria<br>[0.97]  | ASD<br>[1.15]        | Diarrhea<br>[0.74]  | Epilepsy<br>[1.32]  |
| Iowa                      | Dermatitis<br>[1.23] | Neonatal<br>[0.9]    | Asthma<br>[0.86]   | URI<br>[1.16]        | Congenital<br>[0.88] | Skin Viral<br>[0.93] | Urticaria<br>[1.1]   | ASD<br>[1.15]        | Diarrhea<br>[0.74]  | Psoriasis<br>[3.34] |
| Kansas                    | Dermatitis<br>[1.31] | Neonatal<br>[0.98]   | Asthma<br>[1.32]   | URI<br>[1.16]        | Congenital<br>[0.81] | Skin Viral<br>[0.86] | Urticaria<br>[1.08]  | ASD<br>[1.15]        | Iron<br>[7.06]      | Diarrhea<br>[0.72]  |
| Kentucky                  | Dermatitis<br>[1.39] | Neonatal<br>[0.93]   | Asthma<br>[1.3]    | Congenital<br>[0.89] | URI<br>[1.17]        | Skin Viral<br>[0.97] | Urticaria<br>[1.03]  | ASD<br>[1.15]        | Epilepsy<br>[1.31]  | Diarrhea<br>[0.59]  |
| Louisiana                 | Dermatitis<br>[1.48] | Neonatal<br>[0.86]   | Asthma<br>[1.17]   | Skin Viral<br>[1.32] | Congenital<br>[0.88] | URI<br>[1.17]        | Urticaria<br>[1.12]  | Epilepsy<br>[1.32]   | Diarrhea<br>[0.61]  | Psoriasis<br>[4.44] |
| Maine                     | Dermatitis<br>[1.21] | Neonatal<br>[0.98]   | Asthma<br>[1.58]   | Congenital<br>[0.9]  | URI<br>[1.16]        | Urticaria<br>[1.15]  | Skin Viral<br>[0.81] | ASD<br>[1.16]        | Diarrhea<br>[0.78]  | Epilepsy<br>[1.2]   |
| Maryland                  | Dermatitis<br>[1.78] | Neonatal<br>[1.13]   | Asthma<br>[1.72]   | URI<br>[1.15]        | Congenital<br>[0.9]  | Urticaria<br>[1.29]  | Skin Viral<br>[0.94] | ASD<br>[1.27]        | Diarrhea<br>[0.76]  | Psoriasis<br>[4.49] |
| Massachusetts             | Dermatitis<br>[1.59] | Neonatal<br>[1.13]   | Asthma<br>[1.75]   | Congenital<br>[1.0]  | URI<br>[1.16]        | Skin Viral<br>[1.1]  | ASD<br>[1.55]        | Urticaria<br>[1.51]  | Diarrhea<br>[0.83]  | Psoriasis<br>[4.71] |
| Michigan                  | Dermatitis<br>[1.43] | Neonatal<br>[0.96]   | Asthma<br>[1.52]   | Congenital<br>[1.02] | URI<br>[1.16]        | Skin Viral<br>[1.02] | Urticaria<br>[1.18]  | ASD<br>[1.15]        | Diarrhea<br>[0.73]  | Epilepsy<br>[1.31]  |
| Minnesota                 | Dermatitis<br>[1.26] | Neonatal<br>[1.02]   | Asthma<br>[1.11]   | Congenital<br>[0.97] | URI<br>[1.16]        | Skin Viral<br>[1.01] | Urticaria<br>[1.27]  | ASD<br>[1.37]        | Diarrhea<br>[0.75]  | Epilepsy<br>[1.19]  |
| Mississippi               | Dermatitis<br>[1.29] | Neonatal<br>[0.88]   | Asthma<br>[0.94]   | URI<br>[1.17]        | Skin Viral<br>[0.93] | Congenital<br>[0.68] | ASD<br>[1.14]        | Urticaria<br>[0.85]  | Diarrhea<br>[0.67]  | Epilepsy<br>[1.05]  |

**eFigure 9c. Leading ten causes of YLDs with the ratio of observed YLDs to YLDs expected on the basis of Socio-Demographic Index alone in 2017, 1-4 years, both sexes combined.**  
The top ten causes contributing to YLDs are listed globally, by socio-demographic quintile, and then by GBD superregion, region, country, and subnationally where modeled. For each cell, the ratio of observed YLDs to YLDs expected on the basis of socio-demographic index (SDI) alone are listed. Abbreviations: YLD=year of life lived with disability, GBD=Global Burden of Disease.

Values shown in brackets represent the ratio of observed YLDs to predicted YLDs on the basis of Socio-Demographic Index (SDI), rounded to two (2) digits. Color ranges (shown below) were calculated to place a roughly equal number of cells into each bin.

| COLOR KEY:                    |                      | [0.0-0.72]           | [0.72-0.84]          | [0.84-0.92]          | [0.92-1.01]          | [1.01-1.09]          | [1.09-1.17]          | [1.17-1.32]          | [1.32-1.67]         | 1.67+               |
|-------------------------------|----------------------|----------------------|----------------------|----------------------|----------------------|----------------------|----------------------|----------------------|---------------------|---------------------|
|                               | 1                    | 2                    | 3                    | 4                    | 5                    | 6                    | 7                    | 8                    | 9                   | 10                  |
| Missouri                      | Dermatitis<br>[1.24] | Neonatal<br>[0.97]   | Asthma<br>[1.33]     | Congenital<br>[0.93] | URI<br>[1.16]        | Skin Viral<br>[0.87] | ASD<br>[1.21]        | Urticaria<br>[0.98]  | Diarrhea<br>[0.72]  | Epilepsy<br>[1.15]  |
| Montana                       | Dermatitis<br>[1.26] | Neonatal<br>[0.95]   | Asthma<br>[0.97]     | URI<br>[1.16]        | Congenital<br>[0.82] | Skin Viral<br>[0.94] | ASD<br>[1.16]        | Urticaria<br>[0.88]  | Diarrhea<br>[0.66]  | Epilepsy<br>[1.23]  |
| Nebraska                      | Dermatitis<br>[1.25] | Neonatal<br>[0.92]   | Asthma<br>[0.88]     | Congenital<br>[0.93] | URI<br>[1.16]        | Skin Viral<br>[0.96] | Urticaria<br>[1.14]  | ASD<br>[1.17]        | Diarrhea<br>[0.71]  | Psoriasis<br>[3.5]  |
| Nevada                        | Dermatitis<br>[1.58] | Neonatal<br>[0.9]    | Asthma<br>[1.21]     | URI<br>[1.17]        | Congenital<br>[0.73] | Urticaria<br>[1.02]  | ASD<br>[1.15]        | Skin Viral<br>[0.67] | Diarrhea<br>[0.66]  | Epilepsy<br>[1.17]  |
| New Hampshire                 | Dermatitis<br>[1.23] | Neonatal<br>[0.96]   | Asthma<br>[1.47]     | URI<br>[1.16]        | Congenital<br>[0.93] | Skin Viral<br>[0.92] | Urticaria<br>[1.2]   | ASD<br>[1.17]        | Diarrhea<br>[0.88]  | Psoriasis<br>[4.35] |
| New Jersey                    | Dermatitis<br>[1.94] | Neonatal<br>[1.06]   | Asthma<br>[2.04]     | Congenital<br>[1.08] | URI<br>[1.15]        | ASD<br>[1.7]         | Skin Viral<br>[1.12] | Urticaria<br>[1.37]  | Psoriasis<br>[5.31] | Diarrhea<br>[0.81]  |
| New Mexico                    | Dermatitis<br>[1.46] | Neonatal<br>[1.0]    | Asthma<br>[1.32]     | Congenital<br>[0.87] | URI<br>[1.17]        | Urticaria<br>[0.96]  | ASD<br>[1.15]        | Skin Viral<br>[0.63] | Diarrhea<br>[0.64]  | Epilepsy<br>[1.24]  |
| New York                      | Dermatitis<br>[1.95] | Neonatal<br>[1.1]    | Asthma<br>[2.13]     | Congenital<br>[1.1]  | Skin Viral<br>[1.17] | URI<br>[1.15]        | Urticaria<br>[1.38]  | Psoriasis<br>[5.63]  | Epilepsy<br>[1.46]  | Diarrhea<br>[0.73]  |
| N Carolina                    | Dermatitis<br>[1.49] | Neonatal<br>[0.95]   | Asthma<br>[1.25]     | Congenital<br>[0.88] | URI<br>[1.16]        | Skin Viral<br>[0.97] | Urticaria<br>[1.11]  | ASD<br>[1.34]        | Diarrhea<br>[0.71]  | Psoriasis<br>[4.26] |
| N Dakota                      | Dermatitis<br>[1.23] | Neonatal<br>[1.0]    | Asthma<br>[1.17]     | Congenital<br>[1.16] | URI<br>[1.16]        | Skin Viral<br>[0.91] | ASD<br>[1.16]        | Urticaria<br>[0.98]  | Diarrhea<br>[0.71]  | Epilepsy<br>[1.1]   |
| Ohio                          | Dermatitis<br>[1.51] | Neonatal<br>[0.92]   | Asthma<br>[1.36]     | Congenital<br>[1.02] | URI<br>[1.16]        | Urticaria<br>[1.15]  | Skin Viral<br>[0.9]  | ASD<br>[1.15]        | Diarrhea<br>[0.73]  | Epilepsy<br>[1.39]  |
| Oklahoma                      | Dermatitis<br>[1.58] | Neonatal<br>[0.87]   | Asthma<br>[1.36]     | URI<br>[1.16]        | Congenital<br>[0.85] | Skin Viral<br>[0.82] | Urticaria<br>[0.94]  | ASD<br>[1.15]        | Diarrhea<br>[0.69]  | Epilepsy<br>[1.27]  |
| Oregon                        | Dermatitis<br>[1.67] | Neonatal<br>[0.83]   | Asthma<br>[1.12]     | URI<br>[1.16]        | Congenital<br>[0.87] | Skin Viral<br>[0.94] | Urticaria<br>[1.11]  | ASD<br>[1.16]        | Diarrhea<br>[0.71]  | Psoriasis<br>[4.1]  |
| Pennsylvania                  | Dermatitis<br>[1.53] | Neonatal<br>[0.98]   | Asthma<br>[1.57]     | Congenital<br>[1.06] | URI<br>[1.16]        | Skin Viral<br>[0.93] | Urticaria<br>[1.21]  | ASD<br>[1.05]        | Diarrhea<br>[0.76]  | Epilepsy<br>[1.38]  |
| Rhode Island                  | Dermatitis<br>[1.41] | Neonatal<br>[0.95]   | Asthma<br>[1.61]     | Congenital<br>[0.92] | URI<br>[1.16]        | Skin Viral<br>[1.14] | Urticaria<br>[1.34]  | ASD<br>[1.16]        | Diarrhea<br>[0.79]  | Psoriasis<br>[4.42] |
| S Carolina                    | Dermatitis<br>[1.72] | Neonatal<br>[0.89]   | Asthma<br>[1.3]      | URI<br>[1.16]        | Congenital<br>[0.83] | Skin Viral<br>[1.01] | Urticaria<br>[1.16]  | ASD<br>[0.98]        | Diarrhea<br>[0.69]  | Psoriasis<br>[4.45] |
| S Dakota                      | Dermatitis<br>[1.23] | Neonatal<br>[0.82]   | Asthma<br>[0.84]     | URI<br>[1.17]        | Congenital<br>[0.84] | Skin Viral<br>[0.98] | ASD<br>[1.15]        | Urticaria<br>[0.93]  | Diarrhea<br>[0.68]  | Epilepsy<br>[1.05]  |
| Tennessee                     | Dermatitis<br>[1.4]  | Neonatal<br>[0.89]   | Asthma<br>[1.01]     | URI<br>[1.17]        | Congenital<br>[0.79] | ASD<br>[1.49]        | Skin Viral<br>[0.88] | Urticaria<br>[1.02]  | Diarrhea<br>[0.67]  | Epilepsy<br>[1.18]  |
| Texas                         | Dermatitis<br>[1.71] | Neonatal<br>[0.99]   | Asthma<br>[1.43]     | URI<br>[1.16]        | Congenital<br>[0.83] | ASD<br>[1.61]        | Skin Viral<br>[0.88] | Urticaria<br>[1.05]  | Diarrhea<br>[0.62]  | Psoriasis<br>[4.62] |
| Utah                          | Dermatitis<br>[1.39] | Neonatal<br>[0.87]   | Asthma<br>[0.87]     | ASD<br>[1.92]        | URI<br>[1.17]        | Skin Viral<br>[1.08] | Congenital<br>[0.84] | Urticaria<br>[0.94]  | Diarrhea<br>[0.72]  | Iron<br>[5.61]      |
| Vermont                       | Dermatitis<br>[1.23] | Neonatal<br>[1.03]   | Asthma<br>[1.36]     | URI<br>[1.16]        | Congenital<br>[0.91] | Skin Viral<br>[0.86] | ASD<br>[1.17]        | Urticaria<br>[1.01]  | Diarrhea<br>[0.83]  | Psoriasis<br>[3.8]  |
| Virginia                      | Dermatitis<br>[1.81] | Neonatal<br>[1.06]   | Asthma<br>[1.47]     | URI<br>[1.16]        | Congenital<br>[0.82] | Urticaria<br>[1.29]  | Skin Viral<br>[0.84] | ASD<br>[1.16]        | Diarrhea<br>[0.78]  | Epilepsy<br>[1.36]  |
| Washington                    | Dermatitis<br>[1.64] | Neonatal<br>[0.9]    | Asthma<br>[1.08]     | Congenital<br>[0.95] | URI<br>[1.16]        | Urticaria<br>[1.29]  | Skin Viral<br>[0.96] | ASD<br>[1.16]        | Diarrhea<br>[0.76]  | Psoriasis<br>[4.09] |
| W Virginia                    | Dermatitis<br>[1.43] | Neonatal<br>[0.9]    | Asthma<br>[1.36]     | URI<br>[1.17]        | Congenital<br>[0.8]  | Urticaria<br>[0.97]  | Skin Viral<br>[0.79] | Diarrhea<br>[0.71]   | Epilepsy<br>[1.37]  | ASD<br>[0.86]       |
| Wisconsin                     | Dermatitis<br>[1.26] | Neonatal<br>[1.03]   | Asthma<br>[1.09]     | Congenital<br>[0.98] | URI<br>[1.16]        | Skin Viral<br>[0.93] | Urticaria<br>[1.13]  | ASD<br>[1.04]        | Epilepsy<br>[1.35]  | Diarrhea<br>[0.66]  |
| Wyoming                       | Dermatitis<br>[1.37] | Neonatal<br>[0.8]    | Asthma<br>[1.04]     | Congenital<br>[0.91] | URI<br>[1.16]        | ASD<br>[1.15]        | Skin Viral<br>[0.75] | Urticaria<br>[0.85]  | Diarrhea<br>[0.73]  | Epilepsy<br>[1.2]   |
| <b>Southern Latin America</b> | Diarrhea<br>[2.96]   | Neonatal<br>[0.92]   | Dermatitis<br>[1.05] | Asthma<br>[0.96]     | Congenital<br>[0.73] | Skin Viral<br>[0.92] | Urticaria<br>[0.81]  | URI<br>[0.92]        | ASD<br>[1.11]       | Vit A<br>[0.46]     |
| Argentina                     | Diarrhea<br>[3.18]   | Neonatal<br>[0.89]   | Dermatitis<br>[1.0]  | Asthma<br>[0.93]     | Congenital<br>[0.74] | Skin Viral<br>[0.92] | Urticaria<br>[0.8]   | URI<br>[0.92]        | ASD<br>[1.11]       | Vit A<br>[0.47]     |
| Chile                         | Dermatitis<br>[1.22] | Neonatal<br>[1.01]   | Diarrhea<br>[2.48]   | Asthma<br>[1.0]      | Congenital<br>[0.72] | Skin Viral<br>[0.93] | Urticaria<br>[0.86]  | URI<br>[0.9]         | ASD<br>[1.1]        | Epilepsy<br>[1.18]  |
| Uruguay                       | Neonatal<br>[0.97]   | Dermatitis<br>[0.99] | Diarrhea<br>[1.46]   | Asthma<br>[1.05]     | Skin Viral<br>[0.92] | Congenital<br>[0.7]  | Urticaria<br>[0.79]  | URI<br>[0.93]        | ASD<br>[1.12]       | Vit A<br>[0.48]     |
| <b>Western Europe</b>         | Dermatitis<br>[1.12] | Neonatal<br>[0.85]   | Congenital<br>[1.04] | URI<br>[1.29]        | Asthma<br>[0.79]     | Skin Viral<br>[0.95] | Diarrhea<br>[0.88]   | ASD<br>[1.04]        | Falls<br>[0.91]     | Epilepsy<br>[1.06]  |

**eFigure 9c. Leading ten causes of YLDs with the ratio of observed YLDs to YLDs expected on the basis of Socio-Demographic Index alone in 2017, 1-4 years, both sexes combined.**  
The top ten causes contributing to YLDs are listed globally, by socio-demographic quintile, and then by GBD superregion, region, country, and subnationally where modeled. For each cell, the ratio of observed YLDs to YLDs expected on the basis of socio-demographic index (SDI) alone are listed. Abbreviations: YLD=year of life lived with disability, GBD=Global Burden of Disease.

Values shown in brackets represent the ratio of observed YLDs to predicted YLDs on the basis of Socio-Demographic Index (SDI), rounded to two (2) digits. Color ranges (shown below) were calculated to place a roughly equal number of cells into each bin.

| COLOR KEY:           |                      | [0.0-0.72]           | [0.72-0.84]          | [0.84-0.92]          | [0.92-1.01]          | [1.01-1.09]          | [1.09-1.17]          | [1.17-1.32]          | [1.32-1.67]         | 1.67+               |
|----------------------|----------------------|----------------------|----------------------|----------------------|----------------------|----------------------|----------------------|----------------------|---------------------|---------------------|
|                      | 1                    | 2                    | 3                    | 4                    | 5                    | 6                    | 7                    | 8                    | 9                   | 10                  |
| Andorra              | Dermatitis<br>[1.31] | Neonatal<br>[0.92]   | Congenital<br>[1.09] | Asthma<br>[0.95]     | URI<br>[1.28]        | Skin Viral<br>[1.01] | Diarrhea<br>[0.92]   | ASD<br>[1.03]        | Falls<br>[0.79]     | Urticaria<br>[0.68] |
| Austria              | Neonatal<br>[1.37]   | Dermatitis<br>[0.83] | Congenital<br>[1.07] | URI<br>[1.29]        | Diarrhea<br>[1.35]   | Asthma<br>[0.73]     | Hernia<br>[3.72]     | Skin Viral<br>[0.96] | ASD<br>[1.03]       | Falls<br>[0.92]     |
| Belgium              | Dermatitis<br>[0.98] | Neonatal<br>[0.61]   | Congenital<br>[1.02] | URI<br>[1.28]        | Diarrhea<br>[1.2]    | Asthma<br>[0.71]     | Skin Viral<br>[0.98] | ASD<br>[1.03]        | Falls<br>[0.97]     | Epilepsy<br>[1.2]   |
| Cyprus               | Neonatal<br>[1.11]   | Dermatitis<br>[0.85] | Congenital<br>[1.01] | URI<br>[1.29]        | Asthma<br>[0.74]     | Skin Viral<br>[0.96] | Diarrhea<br>[1.05]   | ASD<br>[1.04]        | Hernia<br>[1.81]    | Falls<br>[0.88]     |
| Denmark              | Dermatitis<br>[1.22] | Neonatal<br>[0.75]   | Congenital<br>[1.18] | URI<br>[1.27]        | Asthma<br>[0.96]     | Skin Viral<br>[1.14] | Diarrhea<br>[1.3]    | ASD<br>[1.22]        | Urticaria<br>[0.79] | Falls<br>[0.75]     |
| Finland              | Neonatal<br>[1.76]   | Dermatitis<br>[1.3]  | Congenital<br>[1.1]  | URI<br>[1.28]        | Asthma<br>[0.88]     | Diarrhea<br>[1.37]   | Skin Viral<br>[1.01] | ASD<br>[1.05]        | Falls<br>[0.91]     | Urticaria<br>[0.67] |
| France               | Dermatitis<br>[1.21] | Neonatal<br>[0.7]    | Congenital<br>[1.02] | URI<br>[1.29]        | Asthma<br>[0.81]     | Skin Viral<br>[0.96] | ASD<br>[0.96]        | Urticaria<br>[0.65]  | Epilepsy<br>[1.15]  | Falls<br>[0.91]     |
| Germany              | Dermatitis<br>[0.97] | Neonatal<br>[1.01]   | Congenital<br>[1.05] | Diarrhea<br>[1.45]   | URI<br>[1.28]        | Skin Viral<br>[0.98] | Epilepsy<br>[2.0]    | Asthma<br>[0.6]      | ASD<br>[1.04]       | Falls<br>[0.89]     |
| Greece               | Neonatal<br>[0.86]   | Dermatitis<br>[0.74] | Congenital<br>[0.98] | URI<br>[1.31]        | Asthma<br>[0.65]     | Skin Viral<br>[0.92] | Diarrhea<br>[0.71]   | ASD<br>[1.03]        | Urticaria<br>[0.55] | Falls<br>[1.03]     |
| Iceland              | Dermatitis<br>[1.35] | Neonatal<br>[0.94]   | Asthma<br>[1.27]     | URI<br>[1.28]        | Congenital<br>[1.0]  | Skin Viral<br>[1.1]  | Diarrhea<br>[1.05]   | ASD<br>[1.0]         | Falls<br>[0.78]     | Urticaria<br>[0.69] |
| Ireland              | Dermatitis<br>[1.15] | Neonatal<br>[0.78]   | Asthma<br>[1.07]     | Congenital<br>[1.13] | URI<br>[1.28]        | Skin Viral<br>[0.98] | ASD<br>[1.11]        | Diarrhea<br>[0.69]   | Falls<br>[0.95]     | Urticaria<br>[0.64] |
| Israel               | Dermatitis<br>[1.05] | Neonatal<br>[0.92]   | Congenital<br>[1.0]  | URI<br>[1.3]         | Asthma<br>[0.68]     | Blindness<br>[2.53]  | Skin Viral<br>[0.9]  | ASD<br>[0.96]        | Falls<br>[1.07]     | Diarrhea<br>[0.46]  |
| Italy                | Dermatitis<br>[0.98] | Neonatal<br>[0.66]   | Congenital<br>[0.99] | URI<br>[1.3]         | Skin Viral<br>[0.95] | ASD<br>[1.03]        | Asthma<br>[0.42]     | Diarrhea<br>[0.62]   | Blindness<br>[1.04] | Falls<br>[0.79]     |
| Luxembourg           | Dermatitis<br>[1.31] | Neonatal<br>[1.21]   | Asthma<br>[1.05]     | Congenital<br>[1.07] | URI<br>[1.28]        | Skin Viral<br>[1.02] | Diarrhea<br>[1.15]   | ASD<br>[1.05]        | Vit A<br>[2.42]     | Falls<br>[0.75]     |
| Malta                | Dermatitis<br>[0.88] | Neonatal<br>[0.72]   | Congenital<br>[1.19] | URI<br>[1.3]         | Asthma<br>[0.77]     | Skin Viral<br>[0.93] | ASD<br>[1.04]        | Falls<br>[1.28]      | Urticaria<br>[0.56] | Diarrhea<br>[0.42]  |
| Netherlands          | Dermatitis<br>[1.22] | Neonatal<br>[0.95]   | Congenital<br>[1.09] | URI<br>[1.28]        | Asthma<br>[0.85]     | Skin Viral<br>[0.95] | ASD<br>[1.15]        | Urticaria<br>[0.7]   | Diarrhea<br>[0.62]  | Falls<br>[0.72]     |
| Norway               | Dermatitis<br>[1.31] | Neonatal<br>[1.11]   | Diarrhea<br>[4.13]   | Congenital<br>[1.47] | Asthma<br>[1.28]     | URI<br>[1.27]        | Skin Viral<br>[1.09] | ASD<br>[0.98]        | Hernia<br>[2.31]    | Falls<br>[0.97]     |
| Portugal             | Dermatitis<br>[0.94] | Neonatal<br>[0.59]   | Asthma<br>[0.98]     | URI<br>[1.31]        | Congenital<br>[0.8]  | Skin Viral<br>[0.86] | ASD<br>[1.03]        | Diarrhea<br>[0.43]   | Vit A<br>[0.75]     | Urticaria<br>[0.48] |
| Spain                | Dermatitis<br>[0.75] | Neonatal<br>[0.71]   | URI<br>[1.31]        | Congenital<br>[0.93] | Asthma<br>[0.61]     | Skin Viral<br>[0.92] | ASD<br>[1.04]        | Diarrhea<br>[0.52]   | ID<br>[4.78]        | Urticaria<br>[0.54] |
| Sweden               | Dermatitis<br>[1.63] | Neonatal<br>[0.8]    | Asthma<br>[1.1]      | Congenital<br>[1.23] | URI<br>[1.27]        | Skin Viral<br>[1.07] | Diarrhea<br>[1.21]   | ASD<br>[1.13]        | Falls<br>[1.0]      | Urticaria<br>[0.77] |
| Stockholm            | Dermatitis<br>[1.34] | Neonatal<br>[0.8]    | Congenital<br>[1.28] | Asthma<br>[1.01]     | URI<br>[1.26]        | Skin Viral<br>[1.11] | Diarrhea<br>[1.33]   | ASD<br>[1.43]        | Vit A<br>[2.98]     | Falls<br>[0.9]      |
| Sweden w/o Stockholm | Dermatitis<br>[1.73] | Neonatal<br>[0.8]    | Asthma<br>[1.13]     | Congenital<br>[1.21] | URI<br>[1.27]        | Skin Viral<br>[1.06] | Diarrhea<br>[1.17]   | ASD<br>[1.04]        | Falls<br>[1.04]     | Urticaria<br>[0.75] |
| Switzerland          | Dermatitis<br>[1.3]  | Neonatal<br>[0.87]   | Congenital<br>[1.08] | URI<br>[1.28]        | Asthma<br>[0.86]     | Diarrhea<br>[1.21]   | Skin Viral<br>[0.99] | ASD<br>[1.04]        | Urticaria<br>[0.66] | Blindness<br>[1.05] |
| UK                   | Dermatitis<br>[1.43] | Neonatal<br>[0.99]   | Asthma<br>[1.18]     | Congenital<br>[1.12] | URI<br>[1.28]        | Skin Viral<br>[0.88] | Diarrhea<br>[0.91]   | ASD<br>[1.11]        | Urticaria<br>[0.62] | Iron<br>[4.15]      |
| England              | Dermatitis<br>[1.46] | Neonatal<br>[1.02]   | Asthma<br>[1.21]     | Congenital<br>[1.12] | URI<br>[1.28]        | Skin Viral<br>[0.87] | Diarrhea<br>[0.95]   | ASD<br>[1.12]        | Iron<br>[4.54]      | Urticaria<br>[0.64] |
| E Midlands           | Dermatitis<br>[1.44] | Neonatal<br>[0.96]   | Asthma<br>[1.12]     | Congenital<br>[1.14] | URI<br>[1.28]        | Skin Viral<br>[0.85] | Diarrhea<br>[0.89]   | ASD<br>[1.1]         | Urticaria<br>[0.6]  | Iron<br>[3.48]      |
| Derby                | Dermatitis<br>[1.43] | Neonatal<br>[0.98]   | Asthma<br>[1.15]     | Congenital<br>[1.16] | URI<br>[1.28]        | Skin Viral<br>[0.86] | Diarrhea<br>[0.8]    | ASD<br>[1.1]         | Urticaria<br>[0.63] | Falls<br>[0.98]     |
| Derbyshire           | Dermatitis<br>[1.44] | Neonatal<br>[0.88]   | Asthma<br>[1.08]     | Congenital<br>[1.12] | URI<br>[1.29]        | Diarrhea<br>[0.89]   | Skin Viral<br>[0.84] | ASD<br>[1.1]         | Iron<br>[2.94]      | Urticaria<br>[0.58] |
| Leicester            | Dermatitis<br>[1.44] | Neonatal<br>[0.84]   | Asthma<br>[1.14]     | Congenital<br>[1.16] | URI<br>[1.28]        | Skin Viral<br>[0.86] | Diarrhea<br>[0.9]    | ASD<br>[1.1]         | Urticaria<br>[0.62] | Falls<br>[1.01]     |
| Leicestershire       | Dermatitis<br>[1.44] | Neonatal<br>[0.82]   | Asthma<br>[1.15]     | Congenital<br>[1.16] | URI<br>[1.28]        | Skin Viral<br>[0.86] | Iron<br>[6.52]       | Diarrhea<br>[0.84]   | ASD<br>[1.1]        | Urticaria<br>[0.63] |
| Lincolnshire         | Dermatitis<br>[1.44] | Neonatal<br>[0.93]   | Asthma<br>[1.08]     | Congenital<br>[1.12] | URI<br>[1.29]        | Diarrhea<br>[0.88]   | Skin Viral<br>[0.84] | ASD<br>[1.1]         | Iron<br>[2.73]      | Urticaria<br>[0.57] |

**eFigure 9c. Leading ten causes of YLDs with the ratio of observed YLDs to YLDs expected on the basis of Socio-Demographic Index alone in 2017, 1-4 years, both sexes combined.**  
The top ten causes contributing to YLDs are listed globally, by socio-demographic quintile, and then by GBD superregion, region, country, and subnationally where modeled. For each cell, the ratio of observed YLDs to YLDs expected on the basis of socio-demographic index (SDI) alone are listed. Abbreviations: YLD=year of life lived with disability, GBD=Global Burden of Disease.

Values shown in brackets represent the ratio of observed YLDs to predicted YLDs on the basis of Socio-Demographic Index (SDI), rounded to two (2) digits. Color ranges (shown below) were calculated to place a roughly equal number of cells into each bin.

| COLOR KEY:           |            | [0.0-0.72] | [0.72-0.84] | [0.84-0.92] | [0.92-1.01] | [1.01-1.09] | [1.09-1.17] | [1.17-1.32] | [1.32-1.67] | 1.67+     |    |
|----------------------|------------|------------|-------------|-------------|-------------|-------------|-------------|-------------|-------------|-----------|----|
|                      |            | 1          | 2           | 3           | 4           | 5           | 6           | 7           | 8           | 9         | 10 |
| Northamptonshire     | Dermatitis | Neonatal   | Asthma      | Congenital  | URI         | Diarrhea    | Skin Viral  | ASD         | Urticaria   | Falls     |    |
|                      | [1.44]     | [1.05]     | [1.11]      | [1.14]      | [1.28]      | [0.99]      | [0.85]      | [1.1]       | [0.6]       | [1.03]    |    |
| Nottingham           | Dermatitis | Neonatal   | Asthma      | Congenital  | URI         | Skin Viral  | Diarrhea    | ASD         | Urticaria   | Falls     |    |
|                      | [1.43]     | [1.17]     | [1.21]      | [1.18]      | [1.27]      | [0.88]      | [0.88]      | [1.11]      | [0.66]      | [0.92]    |    |
| Nottinghamshire      | Dermatitis | Neonatal   | Asthma      | Congenital  | URI         | Diarrhea    | Skin Viral  | ASD         | Iron        | Urticaria |    |
|                      | [1.44]     | [1.03]     | [1.09]      | [1.13]      | [1.29]      | [0.87]      | [0.84]      | [1.1]       | [3.21]      | [0.58]    |    |
| Rutland              | Dermatitis | Neonatal   | Asthma      | Congenital  | URI         | Skin Viral  | Diarrhea    | ASD         | Urticaria   | Falls     |    |
|                      | [1.44]     | [0.69]     | [1.13]      | [1.13]      | [1.29]      | [0.86]      | [0.8]       | [1.09]      | [0.61]      | [1.02]    |    |
| E England            | Dermatitis | Neonatal   | Asthma      | Congenital  | URI         | Skin Viral  | Diarrhea    | ASD         | Urticaria   | Falls     |    |
|                      | [1.44]     | [0.92]     | [1.14]      | [1.05]      | [1.28]      | [0.86]      | [0.86]      | [1.17]      | [0.62]      | [1.0]     |    |
| Bedford              | Dermatitis | Neonatal   | Asthma      | Congenital  | URI         | Skin Viral  | Diarrhea    | ASD         | Urticaria   | Falls     |    |
|                      | [1.44]     | [1.11]     | [1.13]      | [1.06]      | [1.27]      | [0.86]      | [0.82]      | [1.09]      | [0.62]      | [0.98]    |    |
| Cambridgeshire       | Dermatitis | Neonatal   | Asthma      | Congenital  | URI         | ASD         | Skin Viral  | Diarrhea    | Urticaria   | Falls     |    |
|                      | [1.43]     | [0.96]     | [1.21]      | [1.09]      | [1.28]      | [1.67]      | [0.89]      | [0.96]      | [0.68]      | [0.9]     |    |
| Cen Bedfordshire     | Dermatitis | Neonatal   | Asthma      | Congenital  | URI         | Skin Viral  | Diarrhea    | ASD         | Urticaria   | Falls     |    |
|                      | [1.44]     | [0.99]     | [1.12]      | [1.02]      | [1.28]      | [0.86]      | [0.89]      | [1.1]       | [0.61]      | [1.01]    |    |
| Essex                | Dermatitis | Neonatal   | Asthma      | Congenital  | URI         | Skin Viral  | Diarrhea    | ASD         | Urticaria   | Falls     |    |
|                      | [1.44]     | [0.91]     | [1.11]      | [1.04]      | [1.29]      | [0.85]      | [0.77]      | [1.11]      | [0.6]       | [1.03]    |    |
| Hertfordshire        | Dermatitis | Neonatal   | Asthma      | Congenital  | URI         | Skin Viral  | Diarrhea    | ASD         | Urticaria   | Falls     |    |
|                      | [1.43]     | [0.94]     | [1.22]      | [1.07]      | [1.27]      | [0.89]      | [0.89]      | [1.12]      | [0.68]      | [0.9]     |    |
| Luton                | Dermatitis | Neonatal   | Asthma      | Congenital  | URI         | Diarrhea    | Skin Viral  | ASD         | Urticaria   | Falls     |    |
|                      | [1.44]     | [1.04]     | [1.13]      | [1.06]      | [1.28]      | [1.02]      | [0.85]      | [1.1]       | [0.61]      | [1.03]    |    |
| Norfolk              | Dermatitis | Neonatal   | Asthma      | Congenital  | URI         | Diarrhea    | Skin Viral  | ASD         | Iron        | Urticaria |    |
|                      | [1.44]     | [0.78]     | [1.1]       | [1.04]      | [1.28]      | [0.92]      | [0.85]      | [1.11]      | [4.43]      | [0.6]     |    |
| Peterborough         | Dermatitis | Neonatal   | Asthma      | Congenital  | URI         | Diarrhea    | Skin Viral  | ASD         | Iron        | Urticaria |    |
|                      | [1.44]     | [0.74]     | [1.11]      | [1.03]      | [1.28]      | [0.89]      | [0.84]      | [1.1]       | [3.68]      | [0.59]    |    |
| Southend-on-Sea      | Dermatitis | Neonatal   | Asthma      | Congenital  | URI         | Skin Viral  | ASD         | Diarrhea    | Iron        | Urticaria |    |
|                      | [1.44]     | [1.06]     | [1.07]      | [1.03]      | [1.29]      | [0.84]      | [1.1]       | [0.7]       | [3.29]      | [0.58]    |    |
| Suffolk              | Dermatitis | Neonatal   | Asthma      | Congenital  | URI         | Skin Viral  | Diarrhea    | ASD         | Urticaria   | Falls     |    |
|                      | [1.44]     | [0.95]     | [1.09]      | [1.02]      | [1.29]      | [0.84]      | [0.87]      | [1.11]      | [0.59]      | [1.07]    |    |
| Thurrock             | Dermatitis | Neonatal   | Asthma      | Congenital  | URI         | Skin Viral  | Diarrhea    | ASD         | Urticaria   | Falls     |    |
|                      | [1.45]     | [1.0]      | [1.07]      | [1.02]      | [1.29]      | [0.84]      | [0.69]      | [1.09]      | [0.57]      | [1.13]    |    |
| Greater London       | Dermatitis | Neonatal   | Asthma      | Congenital  | URI         | Skin Viral  | Diarrhea    | ASD         | Urticaria   | Falls     |    |
|                      | [1.44]     | [1.1]      | [1.49]      | [1.13]      | [1.26]      | [0.91]      | [0.96]      | [1.12]      | [0.73]      | [0.82]    |    |
| Barking & Dagenham   | Dermatitis | Neonatal   | Asthma      | Congenital  | URI         | Iron        | Skin Viral  | Diarrhea    | ASD         | Urticaria |    |
|                      | [1.81]     | [0.97]     | [1.21]      | [1.01]      | [1.29]      | [4.13]      | [0.83]      | [0.75]      | [1.1]       | [0.56]    |    |
| Barnet               | Dermatitis | Neonatal   | Asthma      | Congenital  | URI         | Skin Viral  | Diarrhea    | ASD         | Urticaria   | Falls     |    |
|                      | [1.43]     | [1.02]     | [1.38]      | [1.06]      | [1.27]      | [0.88]      | [0.85]      | [1.11]      | [0.66]      | [0.9]     |    |
| Bexley               | Dermatitis | Neonatal   | Asthma      | Congenital  | URI         | Skin Viral  | Diarrhea    | ASD         | Urticaria   | Falls     |    |
|                      | [1.44]     | [0.94]     | [1.28]      | [1.03]      | [1.29]      | [0.85]      | [0.85]      | [1.18]      | [0.6]       | [1.05]    |    |
| Brent                | Dermatitis | Neonatal   | Asthma      | Congenital  | URI         | Skin Viral  | Diarrhea    | ASD         | Iron        | Urticaria |    |
|                      | [1.43]     | [1.05]     | [1.34]      | [1.04]      | [1.27]      | [0.87]      | [0.86]      | [1.1]       | [5.68]      | [0.64]    |    |
| Bromley              | Dermatitis | Neonatal   | Asthma      | Congenital  | URI         | Skin Viral  | ASD         | Diarrhea    | Urticaria   | Falls     |    |
|                      | [1.43]     | [1.11]     | [1.34]      | [1.07]      | [1.28]      | [0.87]      | [1.18]      | [0.73]      | [0.63]      | [0.96]    |    |
| Camden               | Dermatitis | Neonatal   | Asthma      | Congenital  | URI         | Skin Viral  | ASD         | Diarrhea    | Urticaria   | Falls     |    |
|                      | [1.44]     | [1.0]      | [1.63]      | [1.17]      | [1.26]      | [0.95]      | [1.13]      | [1.02]      | [0.81]      | [0.74]    |    |
| Croydon              | Dermatitis | Neonatal   | Asthma      | Congenital  | URI         | Skin Viral  | Diarrhea    | ASD         | Iron        | Urticaria |    |
|                      | [1.44]     | [1.0]      | [1.3]       | [1.05]      | [1.29]      | [0.86]      | [0.79]      | [1.1]       | [4.29]      | [0.61]    |    |
| Ealing               | Dermatitis | Neonatal   | Asthma      | Congenital  | URI         | Skin Viral  | Diarrhea    | ASD         | Iron        | Urticaria |    |
|                      | [1.43]     | [1.15]     | [1.39]      | [1.06]      | [1.27]      | [0.88]      | [0.95]      | [1.1]       | [5.47]      | [0.66]    |    |
| Enfield              | Dermatitis | Neonatal   | Asthma      | Congenital  | URI         | Skin Viral  | Diarrhea    | ASD         | Urticaria   | Falls     |    |
|                      | [1.44]     | [1.05]     | [1.32]      | [1.05]      | [1.28]      | [0.86]      | [0.88]      | [1.11]      | [0.62]      | [0.98]    |    |
| Greenwich            | Dermatitis | Neonatal   | Asthma      | Congenital  | URI         | Skin Viral  | Diarrhea    | ASD         | Urticaria   | Falls     |    |
|                      | [1.44]     | [0.98]     | [1.3]       | [1.07]      | [1.28]      | [0.86]      | [0.84]      | [1.17]      | [0.61]      | [1.0]     |    |
| Hackney              | Dermatitis | Neonatal   | Asthma      | Congenital  | URI         | Skin Viral  | Diarrhea    | ASD         | Urticaria   | Falls     |    |
|                      | [1.43]     | [1.09]     | [1.49]      | [1.11]      | [1.26]      | [0.9]       | [0.93]      | [1.09]      | [0.71]      | [0.85]    |    |
| Hammersmith & Fulham | Dermatitis | Neonatal   | Asthma      | Congenital  | URI         | Skin Viral  | Diarrhea    | ASD         | Urticaria   | Falls     |    |
|                      | [1.44]     | [1.11]     | [1.59]      | [1.16]      | [1.26]      | [0.95]      | [1.07]      | [1.11]      | [0.8]       | [0.75]    |    |
| Haringey             | Dermatitis | Neonatal   | Asthma      | Congenital  | URI         | Skin Viral  | Diarrhea    | ASD         | Iron        | Urticaria |    |
|                      | [1.43]     | [1.11]     | [1.35]      | [1.08]      | [1.26]      | [0.87]      | [0.82]      | [1.09]      | [4.96]      | [0.64]    |    |
| Harrow               | Dermatitis | Neonatal   | Asthma      | Congenital  | URI         | Skin Viral  | Diarrhea    | ASD         | Urticaria   | Falls     |    |
|                      | [1.43]     | [1.14]     | [1.35]      | [1.06]      | [1.28]      | [0.87]      | [0.87]      | [1.1]       | [0.64]      | [0.95]    |    |

**eFigure 9c. Leading ten causes of YLDs with the ratio of observed YLDs to YLDs expected on the basis of Socio-Demographic Index alone in 2017, 1-4 years, both sexes combined.** The top ten causes contributing to YLDs are listed globally, by socio-demographic quintile, and then by GBD superregion, region, country, and subnationally where modeled. For each cell, the ratio of observed YLDs to YLDs expected on the basis of socio-demographic index (SDI) alone are listed. Abbreviations: YLD=year of life lived with disability, GBD=Global Burden of Disease.

Values shown in brackets represent the ratio of observed YLDs to predicted YLDs on the basis of Socio-Demographic Index (SDI), rounded to two (2) digits. Color ranges (shown below) were calculated to place a roughly equal number of cells into each bin.

| COLOR KEY:           |                      | [0.0-0.72]         | [0.72-0.84]          | [0.84-0.92]          | [0.92-1.01]   | [1.01-1.09]          | [1.09-1.17]          | [1.17-1.32]        | [1.32-1.67]         | 1.67+               |
|----------------------|----------------------|--------------------|----------------------|----------------------|---------------|----------------------|----------------------|--------------------|---------------------|---------------------|
|                      | 1                    | 2                  | 3                    | 4                    | 5             | 6                    | 7                    | 8                  | 9                   | 10                  |
| Havering             | Dermatitis<br>[1.44] | Neonatal<br>[0.98] | Asthma<br>[1.27]     | Congenital<br>[1.04] | URI<br>[1.29] | Skin Viral<br>[0.85] | Diarrhea<br>[0.79]   | ASD<br>[1.11]      | Urticaria<br>[0.6]  | Falls<br>[1.05]     |
| Hillingdon           | Dermatitis<br>[1.43] | Neonatal<br>[1.19] | Asthma<br>[1.45]     | Congenital<br>[1.09] | URI<br>[1.26] | Skin Viral<br>[0.89] | Diarrhea<br>[1.05]   | ASD<br>[1.11]      | Urticaria<br>[0.7]  | Falls<br>[0.86]     |
| Hounslow             | Dermatitis<br>[1.43] | Neonatal<br>[1.14] | Asthma<br>[1.44]     | Congenital<br>[1.08] | URI<br>[1.26] | Skin Viral<br>[0.89] | Diarrhea<br>[0.91]   | ASD<br>[1.11]      | Iron<br>[8.2]       | Urticaria<br>[0.7]  |
| Islington            | Dermatitis<br>[1.44] | Neonatal<br>[0.97] | Asthma<br>[1.59]     | Congenital<br>[1.17] | URI<br>[1.26] | Skin Viral<br>[0.94] | Diarrhea<br>[1.03]   | ASD<br>[1.12]      | Urticaria<br>[0.78] | Falls<br>[0.76]     |
| Kensington & Chelsea | Dermatitis<br>[1.44] | Neonatal<br>[0.96] | Asthma<br>[1.62]     | Congenital<br>[1.16] | URI<br>[1.26] | Skin Viral<br>[0.95] | ASD<br>[1.14]        | Diarrhea<br>[0.92] | Urticaria<br>[0.81] | Falls<br>[0.74]     |
| Kingston upon Thames | Dermatitis<br>[1.43] | Neonatal<br>[1.15] | Asthma<br>[1.48]     | Congenital<br>[1.13] | URI<br>[1.27] | Skin Viral<br>[0.9]  | ASD<br>[1.11]        | Diarrhea<br>[0.89] | Urticaria<br>[0.72] | Falls<br>[0.83]     |
| Lambeth              | Dermatitis<br>[1.43] | Neonatal<br>[0.81] | Asthma<br>[1.5]      | Congenital<br>[1.15] | URI<br>[1.26] | Skin Viral<br>[0.92] | ASD<br>[1.11]        | Diarrhea<br>[0.9]  | Urticaria<br>[0.74] | Falls<br>[0.8]      |
| Lewisham             | Dermatitis<br>[1.43] | Neonatal<br>[1.2]  | Asthma<br>[1.33]     | Congenital<br>[1.07] | URI<br>[1.27] | Skin Viral<br>[0.86] | ASD<br>[1.17]        | Diarrhea<br>[0.76] | Urticaria<br>[0.63] | Iron<br>[4.06]      |
| Merton               | Dermatitis<br>[1.43] | Neonatal<br>[1.07] | Asthma<br>[1.43]     | Congenital<br>[1.1]  | URI<br>[1.27] | Skin Viral<br>[0.89] | ASD<br>[1.11]        | Diarrhea<br>[0.81] | Urticaria<br>[0.68] | Falls<br>[0.87]     |
| Newham               | Dermatitis<br>[1.43] | Neonatal<br>[1.08] | Asthma<br>[1.32]     | Congenital<br>[1.05] | URI<br>[1.28] | Skin Viral<br>[0.86] | Diarrhea<br>[0.9]    | ASD<br>[1.09]      | Urticaria<br>[0.62] | Falls<br>[0.96]     |
| Redbridge            | Dermatitis<br>[1.44] | Neonatal<br>[1.0]  | Asthma<br>[1.28]     | Congenital<br>[1.11] | URI<br>[1.28] | Skin Viral<br>[0.85] | Diarrhea<br>[0.84]   | ASD<br>[1.11]      | Iron<br>[4.08]      | Urticaria<br>[0.6]  |
| Richmond upon Thames | Dermatitis<br>[1.43] | Neonatal<br>[1.21] | Asthma<br>[1.5]      | Congenital<br>[1.14] | URI<br>[1.27] | Skin Viral<br>[0.91] | ASD<br>[1.12]        | Diarrhea<br>[0.84] | Iron<br>[8.69]      | Urticaria<br>[0.74] |
| Southwark            | Dermatitis<br>[1.43] | Neonatal<br>[0.83] | Asthma<br>[1.54]     | Congenital<br>[1.16] | URI<br>[1.26] | Skin Viral<br>[0.93] | ASD<br>[1.17]        | Iron<br>[11.76]    | Diarrhea<br>[0.94]  | Urticaria<br>[0.76] |
| Sutton               | Dermatitis<br>[1.43] | Neonatal<br>[1.26] | Asthma<br>[1.33]     | Congenital<br>[1.06] | URI<br>[1.28] | Skin Viral<br>[0.86] | Diarrhea<br>[0.81]   | ASD<br>[1.11]      | Urticaria<br>[0.63] | Falls<br>[0.96]     |
| Tower Hamlets        | Dermatitis<br>[1.43] | Neonatal<br>[1.2]  | Asthma<br>[1.55]     | Congenital<br>[1.15] | URI<br>[1.26] | Skin Viral<br>[0.92] | Diarrhea<br>[1.0]    | ASD<br>[1.12]      | Urticaria<br>[0.75] | Falls<br>[0.81]     |
| Waltham Forest       | Dermatitis<br>[1.44] | Neonatal<br>[1.0]  | Asthma<br>[1.26]     | Congenital<br>[1.05] | URI<br>[1.28] | Skin Viral<br>[0.84] | Diarrhea<br>[0.82]   | ASD<br>[1.11]      | Urticaria<br>[0.59] | Falls<br>[1.05]     |
| Wandsworth           | Dermatitis<br>[1.43] | Neonatal<br>[0.98] | Asthma<br>[1.55]     | Congenital<br>[1.16] | URI<br>[1.26] | Skin Viral<br>[0.93] | ASD<br>[1.12]        | Diarrhea<br>[0.85] | Urticaria<br>[0.76] | Falls<br>[0.78]     |
| Westminster          | Dermatitis<br>[1.44] | Neonatal<br>[0.91] | Asthma<br>[1.61]     | Congenital<br>[1.15] | URI<br>[1.26] | Skin Viral<br>[0.94] | ASD<br>[1.12]        | Diarrhea<br>[0.96] | Urticaria<br>[0.8]  | Falls<br>[0.75]     |
| NE England           | Dermatitis<br>[1.54] | Neonatal<br>[0.9]  | Asthma<br>[1.1]      | Congenital<br>[1.28] | URI<br>[1.29] | Diarrhea<br>[1.09]   | Skin Viral<br>[0.84] | ASD<br>[1.1]       | Urticaria<br>[0.59] | Falls<br>[1.06]     |
| County Durham        | Dermatitis<br>[1.68] | Neonatal<br>[0.95] | Asthma<br>[1.09]     | Congenital<br>[1.27] | URI<br>[1.29] | Diarrhea<br>[1.08]   | Skin Viral<br>[0.84] | ASD<br>[1.1]       | Urticaria<br>[0.57] | Falls<br>[1.11]     |
| Darlington           | Dermatitis<br>[1.44] | Neonatal<br>[0.87] | Asthma<br>[1.12]     | Congenital<br>[1.29] | URI<br>[1.29] | Diarrhea<br>[1.08]   | Skin Viral<br>[0.85] | ASD<br>[1.09]      | Urticaria<br>[0.59] | Falls<br>[1.04]     |
| Gateshead            | Dermatitis<br>[1.66] | Neonatal<br>[1.0]  | Asthma<br>[1.12]     | Congenital<br>[1.29] | URI<br>[1.28] | Diarrhea<br>[1.05]   | Skin Viral<br>[0.85] | ASD<br>[1.1]       | Urticaria<br>[0.59] | Falls<br>[1.05]     |
| Hartlepool           | Dermatitis<br>[1.45] | Neonatal<br>[0.99] | Asthma<br>[1.08]     | Congenital<br>[1.26] | URI<br>[1.29] | Diarrhea<br>[0.92]   | Skin Viral<br>[0.83] | ASD<br>[1.1]       | Urticaria<br>[0.56] | Falls<br>[1.15]     |
| Middlesbrough        | Dermatitis<br>[1.45] | Neonatal<br>[0.78] | Asthma<br>[1.1]      | Congenital<br>[1.27] | URI<br>[1.28] | Diarrhea<br>[1.15]   | Skin Viral<br>[0.84] | ASD<br>[1.08]      | Urticaria<br>[0.57] | Falls<br>[1.09]     |
| Newcastle upon Tyne  | Dermatitis<br>[1.43] | Neonatal<br>[0.89] | Asthma<br>[1.24]     | Congenital<br>[1.35] | URI<br>[1.27] | Diarrhea<br>[1.25]   | Skin Viral<br>[0.88] | ASD<br>[1.11]      | Urticaria<br>[0.68] | Falls<br>[0.89]     |
| N Tyneside           | Dermatitis<br>[1.44] | Neonatal<br>[0.85] | Asthma<br>[1.12]     | Congenital<br>[1.29] | URI<br>[1.28] | Diarrhea<br>[1.19]   | Skin Viral<br>[0.84] | ASD<br>[1.12]      | Urticaria<br>[0.6]  | Falls<br>[1.06]     |
| Northumberland       | Dermatitis<br>[1.44] | Neonatal<br>[0.86] | Asthma<br>[1.09]     | Congenital<br>[1.28] | URI<br>[1.3]  | Diarrhea<br>[1.02]   | Skin Viral<br>[0.84] | ASD<br>[1.11]      | Urticaria<br>[0.58] | Falls<br>[1.12]     |
| Redcar & Cleveland   | Dermatitis<br>[1.45] | Neonatal<br>[0.8]  | Asthma<br>[1.06]     | Congenital<br>[1.25] | URI<br>[1.3]  | Diarrhea<br>[1.04]   | Skin Viral<br>[0.83] | ASD<br>[1.11]      | Urticaria<br>[0.55] | Falls<br>[1.2]      |
| S Tyneside           | Dermatitis<br>[1.68] | Neonatal<br>[0.84] | Asthma<br>[1.06]     | Congenital<br>[1.25] | URI<br>[1.3]  | Diarrhea<br>[0.98]   | Skin Viral<br>[0.83] | ASD<br>[1.1]       | Iron<br>[2.44]      | Urticaria<br>[0.56] |
| Stockton-on-Tees     | Dermatitis<br>[1.44] | Neonatal<br>[1.07] | Asthma<br>[1.12]     | Congenital<br>[1.29] | URI<br>[1.28] | Diarrhea<br>[1.06]   | Skin Viral<br>[0.85] | ASD<br>[1.09]      | Urticaria<br>[0.59] | Falls<br>[1.04]     |
| Sunderland           | Dermatitis<br>[1.67] | Neonatal<br>[0.78] | Congenital<br>[1.28] | Asthma<br>[0.99]     | URI<br>[1.29] | Diarrhea<br>[1.08]   | Skin Viral<br>[0.84] | ASD<br>[1.1]       | Urticaria<br>[0.58] | Falls<br>[1.08]     |

**eFigure 9c. Leading ten causes of YLDs with the ratio of observed YLDs to YLDs expected on the basis of Socio-Demographic Index alone in 2017, 1-4 years, both sexes combined.**  
The top ten causes contributing to YLDs are listed globally, by socio-demographic quintile, and then by GBD superregion, region, country, and subnationally where modeled. For each cell, the ratio of observed YLDs to YLDs expected on the basis of socio-demographic index (SDI) alone are listed. Abbreviations: YLD=year of life lived with disability, GBD=Global Burden of Disease.

Values shown in brackets represent the ratio of observed YLDs to predicted YLDs on the basis of Socio-Demographic Index (SDI), rounded to two (2) digits. Color ranges (shown below) were calculated to place a roughly equal number of cells into each bin.

| COLOR KEY:            |            | [0.0-0.72] | [0.72-0.84] | [0.84-0.92] | [0.92-1.01] | [1.01-1.09] | [1.09-1.17] | [1.17-1.32] | [1.32-1.67] | 1.67+     |    |
|-----------------------|------------|------------|-------------|-------------|-------------|-------------|-------------|-------------|-------------|-----------|----|
|                       |            | 1          | 2           | 3           | 4           | 5           | 6           | 7           | 8           | 9         | 10 |
| NW England            | Dermatitis | Neonatal   | Asthma      | Congenital  | URI         | Diarrhea    | Skin Viral  | ASD         | Iron        | Urticaria |    |
|                       | [1.44]     | [1.1]      | [1.14]      | [1.23]      | [1.28]      | [1.02]      | [0.85]      | [1.1]       | [5.03]      | [0.61]    |    |
| Blackburn with Darwen | Dermatitis | Neonatal   | Asthma      | Congenital  | URI         | Diarrhea    | Iron        | Skin Viral  | ASD         | Urticaria |    |
|                       | [1.45]     | [1.07]     | [1.08]      | [1.15]      | [1.28]      | [1.08]      | [4.45]      | [0.83]      | [1.09]      | [0.56]    |    |
| Blackpool             | Dermatitis | Neonatal   | Asthma      | Congenital  | URI         | Diarrhea    | Skin Viral  | Iron        | ASD         | Urticaria |    |
|                       | [1.47]     | [1.01]     | [1.05]      | [1.15]      | [1.3]       | [0.79]      | [0.83]      | [2.39]      | [1.09]      | [0.54]    |    |
| Bolton                | Dermatitis | Neonatal   | Asthma      | Congenital  | URI         | Diarrhea    | Skin Viral  | Iron        | ASD         | Urticaria |    |
|                       | [1.45]     | [1.02]     | [1.08]      | [1.16]      | [1.29]      | [0.95]      | [0.84]      | [4.15]      | [1.09]      | [0.57]    |    |
| Bury                  | Dermatitis | Neonatal   | Asthma      | Congenital  | URI         | Diarrhea    | Iron        | Skin Viral  | ASD         | Urticaria |    |
|                       | [1.44]     | [0.99]     | [1.08]      | [1.18]      | [1.28]      | [0.99]      | [5.53]      | [0.84]      | [1.1]       | [0.58]    |    |
| Cheshire E            | Dermatitis | Neonatal   | Asthma      | Congenital  | URI         | Diarrhea    | Skin Viral  | ASD         | Urticaria   | Falls     |    |
|                       | [1.43]     | [1.37]     | [1.21]      | [1.34]      | [1.28]      | [1.06]      | [0.88]      | [1.11]      | [0.66]      | [0.91]    |    |
| Cheshire W & Chester  | Dermatitis | Neonatal   | Asthma      | Congenital  | URI         | Diarrhea    | Skin Viral  | ASD         | Iron        | Urticaria |    |
|                       | [1.43]     | [1.13]     | [1.18]      | [1.33]      | [1.28]      | [1.05]      | [0.87]      | [1.11]      | [5.81]      | [0.64]    |    |
| Cumbria               | Dermatitis | Neonatal   | Asthma      | Congenital  | URI         | Diarrhea    | Skin Viral  | Iron        | ASD         | Urticaria |    |
|                       | [1.44]     | [1.08]     | [1.12]      | [1.19]      | [1.28]      | [1.07]      | [0.85]      | [5.68]      | [1.1]       | [0.6]     |    |
| Halton                | Dermatitis | Neonatal   | Asthma      | Congenital  | URI         | Diarrhea    | Skin Viral  | Iron        | ASD         | Urticaria |    |
|                       | [1.44]     | [1.12]     | [1.12]      | [1.18]      | [1.28]      | [0.98]      | [0.85]      | [5.57]      | [1.08]      | [0.6]     |    |
| Knowsley              | Dermatitis | Neonatal   | Asthma      | Congenital  | URI         | Diarrhea    | Skin Viral  | ASD         | Iron        | Urticaria |    |
|                       | [1.44]     | [1.06]     | [1.1]       | [1.29]      | [1.28]      | [0.93]      | [0.84]      | [1.1]       | [3.24]      | [0.58]    |    |
| Lancashire            | Dermatitis | Neonatal   | Asthma      | Congenital  | URI         | Diarrhea    | Skin Viral  | ASD         | Iron        | Urticaria |    |
|                       | [1.44]     | [1.07]     | [1.12]      | [1.19]      | [1.28]      | [1.11]      | [0.85]      | [1.1]       | [3.83]      | [0.6]     |    |
| Liverpool             | Dermatitis | Neonatal   | Congenital  | Asthma      | URI         | Skin Viral  | Diarrhea    | ASD         | Iron        | Urticaria |    |
|                       | [1.43]     | [1.21]     | [1.35]      | [1.17]      | [1.28]      | [0.87]      | [0.9]       | [1.1]       | [5.5]       | [0.64]    |    |
| Manchester            | Dermatitis | Neonatal   | Asthma      | Congenital  | URI         | Diarrhea    | Skin Viral  | ASD         | Iron        | Urticaria |    |
|                       | [1.43]     | [1.25]     | [1.29]      | [1.28]      | [1.26]      | [1.21]      | [0.9]       | [1.1]       | [7.9]       | [0.71]    |    |
| Oldham                | Dermatitis | Neonatal   | Asthma      | Congenital  | URI         | Diarrhea    | Skin Viral  | ASD         | Iron        | Urticaria |    |
|                       | [1.46]     | [0.8]      | [1.07]      | [1.16]      | [1.29]      | [0.92]      | [0.83]      | [1.09]      | [2.41]      | [0.55]    |    |
| Rochdale              | Dermatitis | Neonatal   | Asthma      | Congenital  | URI         | Iron        | Diarrhea    | Skin Viral  | ASD         | Urticaria |    |
|                       | [1.45]     | [0.83]     | [1.07]      | [1.15]      | [1.29]      | [5.08]      | [0.96]      | [0.83]      | [1.1]       | [0.56]    |    |
| Salford               | Dermatitis | Neonatal   | Asthma      | Congenital  | URI         | Diarrhea    | Skin Viral  | ASD         | Urticaria   | Falls     |    |
|                       | [1.43]     | [1.24]     | [1.16]      | [1.21]      | [1.28]      | [0.94]      | [0.86]      | [1.1]       | [0.62]      | [0.99]    |    |
| Sefton                | Dermatitis | Neonatal   | Asthma      | Congenital  | URI         | Diarrhea    | Skin Viral  | ASD         | Iron        | Urticaria |    |
|                       | [1.44]     | [1.08]     | [1.08]      | [1.28]      | [1.29]      | [0.86]      | [0.84]      | [1.11]      | [3.82]      | [0.57]    |    |
| St Helens             | Dermatitis | Neonatal   | Asthma      | Congenital  | URI         | Diarrhea    | Skin Viral  | ASD         | Iron        | Urticaria |    |
|                       | [1.45]     | [1.09]     | [1.07]      | [1.27]      | [1.29]      | [0.89]      | [0.84]      | [1.1]       | [3.01]      | [0.57]    |    |
| Stockport             | Dermatitis | Neonatal   | Asthma      | Congenital  | URI         | Diarrhea    | Skin Viral  | Iron        | ASD         | Urticaria |    |
|                       | [1.43]     | [0.95]     | [1.15]      | [1.22]      | [1.28]      | [1.15]      | [0.86]      | [6.08]      | [1.11]      | [0.62]    |    |
| Tameside              | Dermatitis | Neonatal   | Asthma      | Congenital  | URI         | Diarrhea    | Skin Viral  | ASD         | Iron        | Urticaria |    |
|                       | [1.45]     | [0.89]     | [1.06]      | [1.15]      | [1.29]      | [0.96]      | [0.83]      | [1.1]       | [2.45]      | [0.55]    |    |
| Trafford              | Dermatitis | Neonatal   | Asthma      | Congenital  | URI         | Skin Viral  | Diarrhea    | ASD         | Iron        | Urticaria |    |
|                       | [1.43]     | [1.24]     | [1.24]      | [1.25]      | [1.27]      | [0.89]      | [1.03]      | [1.1]       | [6.61]      | [0.68]    |    |
| Warrington            | Dermatitis | Neonatal   | Asthma      | Congenital  | URI         | Diarrhea    | Skin Viral  | ASD         | Iron        | Urticaria |    |
|                       | [1.43]     | [1.3]      | [1.2]       | [1.23]      | [1.27]      | [1.04]      | [0.88]      | [1.1]       | [6.32]      | [0.66]    |    |
| Wigan                 | Dermatitis | Neonatal   | Asthma      | Congenital  | URI         | Iron        | Diarrhea    | Skin Viral  | ASD         | Urticaria |    |
|                       | [1.45]     | [1.08]     | [1.06]      | [1.16]      | [1.3]       | [4.1]       | [0.84]      | [0.83]      | [1.11]      | [0.56]    |    |
| Wirral                | Dermatitis | Neonatal   | Asthma      | Congenital  | URI         | Diarrhea    | Skin Viral  | ASD         | Iron        | Urticaria |    |
|                       | [1.44]     | [1.19]     | [1.07]      | [1.28]      | [1.29]      | [0.94]      | [0.83]      | [1.1]       | [3.05]      | [0.57]    |    |
| SE England            | Dermatitis | Neonatal   | Asthma      | Congenital  | URI         | Skin Viral  | Diarrhea    | ASD         | Iron        | Urticaria |    |
|                       | [1.54]     | [1.04]     | [1.26]      | [1.12]      | [1.28]      | [0.87]      | [0.91]      | [1.19]      | [5.11]      | [0.65]    |    |
| Bracknell Forest      | Dermatitis | Neonatal   | Asthma      | Congenital  | URI         | Skin Viral  | Iron        | Diarrhea    | ASD         | Urticaria |    |
|                       | [1.43]     | [0.85]     | [1.2]       | [1.13]      | [1.28]      | [0.89]      | [8.48]      | [0.87]      | [1.1]       | [0.67]    |    |
| Brighton & Hove       | Dermatitis | Neonatal   | Asthma      | Congenital  | URI         | Skin Viral  | ASD         | Diarrhea    | Urticaria   | Falls     |    |
|                       | [1.65]     | [1.15]     | [1.24]      | [1.18]      | [1.27]      | [0.9]       | [1.1]       | [0.86]      | [0.7]       | [0.86]    |    |
| Buckinghamshire       | Dermatitis | Neonatal   | Asthma      | Congenital  | URI         | Skin Viral  | Diarrhea    | Epilepsy    | ASD         | Iron      |    |
|                       | [1.43]     | [1.22]     | [1.18]      | [1.13]      | [1.28]      | [0.88]      | [0.98]      | [1.85]      | [1.11]      | [6.94]    |    |
| E Sussex              | Dermatitis | Neonatal   | Asthma      | Congenital  | URI         | Diarrhea    | Skin Viral  | ASD         | Iron        | Urticaria |    |
|                       | [1.64]     | [1.06]     | [1.03]      | [1.08]      | [1.29]      | [0.88]      | [0.84]      | [1.18]      | [4.08]      | [0.58]    |    |
| Hampshire             | Dermatitis | Neonatal   | Asthma      | Congenital  | URI         | Skin Viral  | Diarrhea    | Iron        | ASD         | Urticaria |    |
|                       | [1.43]     | [1.01]     | [1.69]      | [1.11]      | [1.29]      | [0.87]      | [0.92]      | [6.7]       | [1.11]      | [0.64]    |    |
| Isle of Wight         | Dermatitis | Neonatal   | Asthma      | Congenital  | URI         | Skin Viral  | Diarrhea    | ASD         | Iron        | Urticaria |    |
|                       | [1.42]     | [0.93]     | [1.58]      | [1.06]      | [1.29]      | [0.84]      | [0.82]      | [1.1]       | [3.24]      | [0.58]    |    |

**eFigure 9c. Leading ten causes of YLDs with the ratio of observed YLDs to YLDs expected on the basis of Socio-Demographic Index alone in 2017, 1-4 years, both sexes combined.**  
The top ten causes contributing to YLDs are listed globally, by socio-demographic quintile, and then by GBD superregion, region, country, and subnationally where modeled. For each cell, the ratio of observed YLDs to YLDs expected on the basis of socio-demographic index (SDI) alone are listed. Abbreviations: YLD=year of life lived with disability, GBD=Global Burden of Disease.

Values shown in brackets represent the ratio of observed YLDs to predicted YLDs on the basis of Socio-Demographic Index (SDI), rounded to two (2) digits. Color ranges (shown below) were calculated to place a roughly equal number of cells into each bin.

| COLOR KEY:           |            | [0.0-0.72] | [0.72-0.84] | [0.84-0.92] | [0.92-1.01] | [1.01-1.09] | [1.09-1.17] | [1.17-1.32] | [1.32-1.67] | 1.67+     |    |
|----------------------|------------|------------|-------------|-------------|-------------|-------------|-------------|-------------|-------------|-----------|----|
|                      |            | 1          | 2           | 3           | 4           | 5           | 6           | 7           | 8           | 9         | 10 |
| Kent                 | Dermatitis | Neonatal   | Asthma      | Congenital  | URI         | ASD         | Skin Viral  | Diarrhea    | Urticaria   | Iron      |    |
|                      | [1.63]     | [0.99]     | [1.1]       | [1.08]      | [1.29]      | [1.55]      | [0.85]      | [0.85]      | [0.6]       | [3.54]    |    |
| Medway               | Dermatitis | Neonatal   | Asthma      | Congenital  | URI         | Diarrhea    | Skin Viral  | ASD         | Iron        | Urticaria |    |
|                      | [1.44]     | [1.04]     | [1.06]      | [1.07]      | [1.29]      | [0.89]      | [0.84]      | [1.1]       | [3.12]      | [0.57]    |    |
| Milton Keynes        | Dermatitis | Neonatal   | Asthma      | Congenital  | URI         | Diarrhea    | Skin Viral  | ASD         | Iron        | Urticaria |    |
|                      | [1.43]     | [0.92]     | [1.19]      | [1.12]      | [1.27]      | [1.01]      | [0.88]      | [1.11]      | [6.08]      | [0.66]    |    |
| Oxfordshire          | Dermatitis | Neonatal   | Asthma      | Congenital  | URI         | Skin Viral  | Diarrhea    | ASD         | Urticaria   | Falls     |    |
|                      | [1.79]     | [0.98]     | [1.23]      | [1.15]      | [1.27]      | [0.9]       | [0.9]       | [1.11]      | [0.7]       | [0.87]    |    |
| Portsmouth           | Dermatitis | Neonatal   | Asthma      | Congenital  | URI         | Skin Viral  | Diarrhea    | ASD         | Urticaria   | Falls     |    |
|                      | [1.43]     | [1.01]     | [1.17]      | [1.1]       | [1.27]      | [0.88]      | [0.99]      | [1.1]       | [0.65]      | [0.92]    |    |
| Reading              | Dermatitis | Neonatal   | Asthma      | Congenital  | URI         | Skin Viral  | Diarrhea    | ASD         | Iron        | Urticaria |    |
|                      | [1.79]     | [1.27]     | [1.29]      | [1.17]      | [1.26]      | [0.91]      | [1.02]      | [1.1]       | [8.64]      | [0.73]    |    |
| Slough               | Dermatitis | Neonatal   | Asthma      | Congenital  | URI         | Diarrhea    | Skin Viral  | ASD         | Urticaria   | Falls     |    |
|                      | [1.43]     | [1.1]      | [1.21]      | [1.12]      | [1.27]      | [1.03]      | [0.88]      | [1.1]       | [0.66]      | [0.93]    |    |
| Southampton          | Dermatitis | Neonatal   | Asthma      | Congenital  | URI         | Skin Viral  | Diarrhea    | ASD         | Urticaria   | Falls     |    |
|                      | [1.43]     | [1.0]      | [1.17]      | [1.12]      | [1.28]      | [0.87]      | [0.94]      | [1.11]      | [0.66]      | [0.93]    |    |
| Surrey               | Dermatitis | Neonatal   | Asthma      | Congenital  | URI         | Skin Viral  | ASD         | Diarrhea    | Iron        | Urticaria |    |
|                      | [1.61]     | [1.16]     | [1.24]      | [1.16]      | [1.28]      | [0.9]       | [1.12]      | [0.89]      | [7.35]      | [0.7]     |    |
| West Berkshire       | Dermatitis | Neonatal   | Asthma      | Congenital  | URI         | Skin Viral  | Diarrhea    | ASD         | Urticaria   | Falls     |    |
|                      | [1.43]     | [0.97]     | [1.21]      | [1.14]      | [1.27]      | [0.88]      | [0.92]      | [1.12]      | [0.68]      | [0.91]    |    |
| W Sussex             | Dermatitis | Neonatal   | Asthma      | Congenital  | URI         | Skin Viral  | Diarrhea    | ASD         | Urticaria   | Falls     |    |
|                      | [1.48]     | [1.02]     | [1.29]      | [1.11]      | [1.29]      | [0.86]      | [0.87]      | [1.11]      | [0.63]      | [0.97]    |    |
| Windsor & Maidenhead | Dermatitis | Neonatal   | Asthma      | Congenital  | URI         | Skin Viral  | Diarrhea    | ASD         | Urticaria   | Falls     |    |
|                      | [1.43]     | [1.03]     | [1.26]      | [1.17]      | [1.27]      | [0.9]       | [1.01]      | [1.12]      | [0.72]      | [0.84]    |    |
| Wokingham            | Dermatitis | Neonatal   | Asthma      | Congenital  | URI         | Skin Viral  | Diarrhea    | ASD         | Iron        | Urticaria |    |
|                      | [1.43]     | [1.05]     | [1.24]      | [1.17]      | [1.27]      | [0.9]       | [0.98]      | [1.13]      | [8.37]      | [0.7]     |    |
| SW England           | Dermatitis | Neonatal   | Asthma      | Congenital  | URI         | Skin Viral  | Diarrhea    | ASD         | Iron        | Urticaria |    |
|                      | [1.44]     | [1.07]     | [1.13]      | [1.01]      | [1.28]      | [0.86]      | [0.88]      | [1.15]      | [5.66]      | [0.62]    |    |
| Bath & NE Somerset   | Dermatitis | Neonatal   | Asthma      | Congenital  | URI         | Skin Viral  | ASD         | Diarrhea    | Iron        | Urticaria |    |
|                      | [1.43]     | [1.44]     | [1.22]      | [1.04]      | [1.27]      | [0.89]      | [1.32]      | [0.99]      | [6.35]      | [0.68]    |    |
| Bournemouth          | Dermatitis | Neonatal   | Asthma      | Congenital  | URI         | Skin Viral  | Diarrhea    | Iron        | ASD         | Urticaria |    |
|                      | [1.43]     | [1.08]     | [1.17]      | [1.03]      | [1.28]      | [0.88]      | [0.95]      | [7.49]      | [1.1]       | [0.66]    |    |
| Bristol              | Dermatitis | Neonatal   | Asthma      | Congenital  | URI         | Skin Viral  | ASD         | Diarrhea    | Urticaria   | Falls     |    |
|                      | [1.43]     | [1.27]     | [1.26]      | [1.06]      | [1.27]      | [0.9]       | [1.31]      | [0.88]      | [0.71]      | [0.84]    |    |
| Cornwall             | Dermatitis | Neonatal   | Asthma      | Congenital  | URI         | Diarrhea    | Iron        | Skin Viral  | ASD         | Urticaria |    |
|                      | [1.44]     | [1.04]     | [1.06]      | [0.99]      | [1.29]      | [0.89]      | [5.03]      | [0.84]      | [1.11]      | [0.58]    |    |
| Devon                | Dermatitis | Neonatal   | Asthma      | Congenital  | URI         | Iron        | Skin Viral  | Diarrhea    | ASD         | Urticaria |    |
|                      | [1.44]     | [0.96]     | [1.1]       | [1.0]       | [1.28]      | [7.6]       | [0.85]      | [0.9]       | [1.11]      | [0.61]    |    |
| Dorset               | Dermatitis | Neonatal   | Asthma      | Congenital  | URI         | Skin Viral  | Diarrhea    | ASD         | Urticaria   | Falls     |    |
|                      | [1.44]     | [1.02]     | [1.09]      | [0.99]      | [1.29]      | [0.85]      | [0.86]      | [1.1]       | [0.6]       | [1.05]    |    |
| Gloucestershire      | Dermatitis | Neonatal   | Asthma      | Congenital  | URI         | Iron        | Diarrhea    | Skin Viral  | ASD         | Urticaria |    |
|                      | [1.43]     | [0.99]     | [1.15]      | [1.01]      | [1.28]      | [9.51]      | [0.96]      | [0.87]      | [1.1]       | [0.64]    |    |
| N Somerset           | Dermatitis | Neonatal   | Asthma      | Congenital  | URI         | Skin Viral  | ASD         | Diarrhea    | Urticaria   | Iron      |    |
|                      | [1.44]     | [1.14]     | [1.1]       | [1.01]      | [1.28]      | [0.85]      | [1.32]      | [0.74]      | [0.6]       | [3.41]    |    |
| Plymouth             | Dermatitis | Neonatal   | Asthma      | Congenital  | URI         | Diarrhea    | Skin Viral  | ASD         | Urticaria   | Falls     |    |
|                      | [1.44]     | [1.05]     | [1.1]       | [1.0]       | [1.28]      | [0.95]      | [0.85]      | [1.1]       | [0.61]      | [1.0]     |    |
| Poole                | Dermatitis | Neonatal   | Asthma      | Congenital  | URI         | Skin Viral  | Diarrhea    | ASD         | Iron        | Urticaria |    |
|                      | [1.43]     | [1.05]     | [1.13]      | [1.01]      | [1.28]      | [0.86]      | [0.9]       | [1.12]      | [4.01]      | [0.62]    |    |
| Somerset             | Dermatitis | Neonatal   | Asthma      | Congenital  | URI         | Iron        | Skin Viral  | Diarrhea    | ASD         | Urticaria |    |
|                      | [1.44]     | [1.08]     | [1.07]      | [0.98]      | [1.3]       | [6.08]      | [0.84]      | [0.84]      | [1.1]       | [0.58]    |    |
| S Gloucestershire    | Dermatitis | Neonatal   | Asthma      | Congenital  | URI         | Skin Viral  | ASD         | Diarrhea    | Urticaria   | Falls     |    |
|                      | [1.43]     | [1.13]     | [1.2]       | [1.03]      | [1.28]      | [0.88]      | [1.3]       | [0.78]      | [0.66]      | [0.9]     |    |
| Swindon              | Dermatitis | Neonatal   | Asthma      | Congenital  | URI         | Skin Viral  | Diarrhea    | ASD         | Urticaria   | Falls     |    |
|                      | [1.44]     | [0.79]     | [1.15]      | [1.0]       | [1.28]      | [0.86]      | [0.87]      | [1.11]      | [0.63]      | [0.97]    |    |
| Torbay               | Dermatitis | Neonatal   | Asthma      | Congenital  | URI         | Iron        | Skin Viral  | Diarrhea    | ASD         | Urticaria |    |
|                      | [1.46]     | [0.85]     | [1.03]      | [0.97]      | [1.3]       | [4.39]      | [0.83]      | [0.77]      | [1.09]      | [0.55]    |    |
| Wiltshire            | Dermatitis | Neonatal   | Asthma      | Congenital  | URI         | Skin Viral  | Diarrhea    | ASD         | Iron        | Urticaria |    |
|                      | [1.44]     | [1.2]      | [1.1]       | [0.99]      | [1.28]      | [0.85]      | [0.79]      | [1.1]       | [4.17]      | [0.6]     |    |
| W Midlands           | Dermatitis | Neonatal   | Asthma      | Congenital  | URI         | Diarrhea    | Skin Viral  | ASD         | Falls       | Urticaria |    |
|                      | [1.44]     | [1.0]      | [1.11]      | [1.07]      | [1.28]      | [0.94]      | [0.85]      | [1.02]      | [1.07]      | [0.6]     |    |
| Birmingham           | Dermatitis | Neonatal   | Asthma      | Congenital  | URI         | Diarrhea    | Skin Viral  | ASD         | Falls       | Urticaria |    |
|                      | [1.44]     | [0.99]     | [1.13]      | [1.09]      | [1.27]      | [0.97]      | [0.86]      | [0.81]      | [1.05]      | [0.62]    |    |

**eFigure 9c. Leading ten causes of YLDs with the ratio of observed YLDs to YLDs expected on the basis of Socio-Demographic Index alone in 2017, 1-4 years, both sexes combined.**  
The top ten causes contributing to YLDs are listed globally, by socio-demographic quintile, and then by GBD superregion, region, country, and subnationally where modeled. For each cell, the ratio of observed YLDs to YLDs expected on the basis of socio-demographic index (SDI) alone are listed. Abbreviations: YLD=year of life lived with disability, GBD=Global Burden of Disease.

Values shown in brackets represent the ratio of observed YLDs to predicted YLDs on the basis of Socio-Demographic Index (SDI), rounded to two (2) digits. Color ranges (shown below) were calculated to place a roughly equal number of cells into each bin.

| COLOR KEY:            |            | [0.0-0.72] | [0.72-0.84] | [0.84-0.92] | [0.92-1.01] | [1.01-1.09] | [1.09-1.17] | [1.17-1.32] | [1.32-1.67] | 1.67+     |
|-----------------------|------------|------------|-------------|-------------|-------------|-------------|-------------|-------------|-------------|-----------|
|                       | 1          | 2          | 3           | 4           | 5           | 6           | 7           | 8           | 9           | 10        |
| Coventry              | Dermatitis | Neonatal   | Asthma      | Congenital  | URI         | Skin Viral  | Diarrhea    | ASD         | Urticaria   | Falls     |
|                       | [1.43]     | [0.97]     | [1.16]      | [1.09]      | [1.27]      | [0.86]      | [0.87]      | [1.11]      | [0.64]      | [0.96]    |
| Dudley                | Dermatitis | Neonatal   | Asthma      | Congenital  | URI         | Diarrhea    | Skin Viral  | ASD         | Urticaria   | Falls     |
|                       | [1.45]     | [1.07]     | [1.05]      | [1.04]      | [1.29]      | [0.92]      | [0.84]      | [1.1]       | [0.56]      | [1.18]    |
| Herefordshire         | Dermatitis | Neonatal   | Asthma      | Congenital  | URI         | Diarrhea    | Skin Viral  | ASD         | Urticaria   | Falls     |
|                       | [1.43]     | [1.03]     | [1.11]      | [1.07]      | [1.28]      | [0.96]      | [0.85]      | [1.11]      | [0.6]       | [1.03]    |
| Sandwell              | Dermatitis | Neonatal   | Asthma      | Congenital  | URI         | Diarrhea    | Skin Viral  | ASD         | Urticaria   | Falls     |
|                       | [1.45]     | [1.04]     | [1.06]      | [1.03]      | [1.29]      | [0.92]      | [0.83]      | [1.1]       | [0.56]      | [1.21]    |
| Shropshire            | Dermatitis | Neonatal   | Asthma      | Congenital  | URI         | Diarrhea    | Skin Viral  | ASD         | Urticaria   | Falls     |
|                       | [1.44]     | [0.99]     | [1.11]      | [1.06]      | [1.28]      | [0.92]      | [0.85]      | [1.11]      | [0.6]       | [1.03]    |
| Solihull              | Dermatitis | Neonatal   | Asthma      | Congenital  | URI         | Skin Viral  | Diarrhea    | ASD         | Falls       | Urticaria |
|                       | [1.43]     | [0.76]     | [1.17]      | [1.1]       | [1.28]      | [0.87]      | [0.89]      | [1.11]      | [0.98]      | [0.65]    |
| Staffordshire         | Dermatitis | Neonatal   | Asthma      | Congenital  | URI         | Diarrhea    | Skin Viral  | ASD         | Falls       | Urticaria |
|                       | [1.44]     | [0.97]     | [1.1]       | [1.06]      | [1.29]      | [1.02]      | [0.85]      | [1.04]      | [1.09]      | [0.6]     |
| Stoke-on-Trent        | Dermatitis | Neonatal   | Asthma      | Congenital  | URI         | Diarrhea    | Skin Viral  | ASD         | Falls       | Urticaria |
|                       | [1.45]     | [1.14]     | [1.06]      | [1.05]      | [1.28]      | [1.0]       | [0.84]      | [1.09]      | [1.22]      | [0.57]    |
| Telford & Wrekin      | Dermatitis | Neonatal   | Asthma      | Congenital  | URI         | Diarrhea    | Skin Viral  | Iron        | ASD         | Urticaria |
|                       | [1.44]     | [0.99]     | [1.1]       | [1.05]      | [1.28]      | [0.92]      | [0.84]      | [5.17]      | [1.1]       | [0.59]    |
| Walsall               | Dermatitis | Neonatal   | Asthma      | Congenital  | URI         | Diarrhea    | Skin Viral  | ASD         | Iron        | Urticaria |
|                       | [1.45]     | [0.97]     | [1.04]      | [1.03]      | [1.29]      | [0.81]      | [0.83]      | [1.1]       | [2.23]      | [0.55]    |
| Warwickshire          | Dermatitis | Neonatal   | Asthma      | Congenital  | URI         | Skin Viral  | Diarrhea    | ASD         | Urticaria   | Falls     |
|                       | [1.43]     | [1.03]     | [1.17]      | [1.09]      | [1.28]      | [0.87]      | [0.89]      | [1.1]       | [0.65]      | [0.97]    |
| Wolverhampton         | Dermatitis | Neonatal   | Asthma      | Congenital  | URI         | Diarrhea    | Skin Viral  | ASD         | Urticaria   | Falls     |
|                       | [1.45]     | [0.73]     | [1.07]      | [1.05]      | [1.28]      | [1.0]       | [0.84]      | [1.09]      | [0.57]      | [1.12]    |
| Worcestershire        | Dermatitis | Neonatal   | Asthma      | Congenital  | URI         | Skin Viral  | Diarrhea    | ASD         | Urticaria   | Falls     |
|                       | [1.43]     | [1.11]     | [1.12]      | [1.07]      | [1.28]      | [0.85]      | [0.84]      | [1.11]      | [0.61]      | [1.04]    |
| Yorkshire & Humber    | Dermatitis | Neonatal   | Asthma      | Congenital  | URI         | Diarrhea    | Skin Viral  | ASD         | Iron        | Urticaria |
|                       | [1.44]     | [0.94]     | [1.13]      | [1.07]      | [1.28]      | [0.97]      | [0.85]      | [1.1]       | [3.96]      | [0.6]     |
| Barnsley              | Dermatitis | Neonatal   | Asthma      | Congenital  | URI         | Diarrhea    | Skin Viral  | ASD         | Iron        | Urticaria |
|                       | [1.46]     | [0.96]     | [1.06]      | [1.02]      | [1.3]       | [0.95]      | [0.83]      | [1.11]      | [2.57]      | [0.54]    |
| Bradford              | Dermatitis | Neonatal   | Asthma      | Congenital  | URI         | Diarrhea    | Skin Viral  | ASD         | Urticaria   | Iron      |
|                       | [1.45]     | [1.0]      | [1.08]      | [1.05]      | [1.29]      | [0.92]      | [0.84]      | [1.1]       | [0.57]      | [2.4]     |
| Calderdale            | Dermatitis | Neonatal   | Asthma      | Congenital  | URI         | Diarrhea    | Skin Viral  | ASD         | Iron        | Urticaria |
|                       | [1.44]     | [0.91]     | [1.12]      | [1.06]      | [1.28]      | [0.99]      | [0.85]      | [1.08]      | [3.7]       | [0.6]     |
| Doncaster             | Dermatitis | Neonatal   | Asthma      | Congenital  | URI         | Diarrhea    | Skin Viral  | ASD         | Urticaria   | Iron      |
|                       | [1.46]     | [1.17]     | [1.05]      | [1.04]      | [1.3]       | [0.9]       | [0.83]      | [1.1]       | [0.55]      | [1.93]    |
| E Riding of Yorkshire | Dermatitis | Neonatal   | Asthma      | Congenital  | URI         | Diarrhea    | Skin Viral  | ASD         | Urticaria   | Falls     |
|                       | [1.44]     | [0.92]     | [1.1]       | [1.06]      | [1.29]      | [0.88]      | [0.84]      | [1.11]      | [0.59]      | [1.07]    |
| Kingston upon Hull    | Dermatitis | Neonatal   | Asthma      | Congenital  | URI         | Diarrhea    | Skin Viral  | ASD         | Iron        | Urticaria |
|                       | [1.44]     | [0.86]     | [1.11]      | [1.05]      | [1.29]      | [0.92]      | [0.84]      | [1.1]       | [3.82]      | [0.58]    |
| Kirklees              | Dermatitis | Neonatal   | Asthma      | Congenital  | URI         | Diarrhea    | Skin Viral  | Iron        | ASD         | Urticaria |
|                       | [1.45]     | [0.87]     | [1.1]       | [1.06]      | [1.28]      | [0.98]      | [0.84]      | [4.88]      | [1.09]      | [0.58]    |
| Leeds                 | Dermatitis | Neonatal   | Asthma      | Congenital  | URI         | Skin Viral  | Diarrhea    | ASD         | Urticaria   | Iron      |
|                       | [1.43]     | [0.89]     | [1.23]      | [1.12]      | [1.27]      | [0.89]      | [0.96]      | [1.1]       | [0.68]      | [5.38]    |
| NE Lincolnshire       | Dermatitis | Neonatal   | Asthma      | Congenital  | URI         | Skin Viral  | Diarrhea    | ASD         | Urticaria   | Falls     |
|                       | [1.45]     | [0.89]     | [1.09]      | [1.05]      | [1.29]      | [0.84]      | [0.78]      | [1.1]       | [0.57]      | [1.12]    |
| N Lincolnshire        | Dermatitis | Neonatal   | Asthma      | Congenital  | URI         | Diarrhea    | Skin Viral  | ASD         | Iron        | Urticaria |
|                       | [1.44]     | [0.83]     | [1.09]      | [1.05]      | [1.29]      | [0.87]      | [0.84]      | [1.1]       | [3.46]      | [0.57]    |
| N Yorkshire           | Dermatitis | Neonatal   | Asthma      | Congenital  | URI         | Diarrhea    | Skin Viral  | ASD         | Urticaria   | Falls     |
|                       | [1.43]     | [1.06]     | [1.15]      | [1.08]      | [1.28]      | [1.06]      | [0.86]      | [1.11]      | [0.62]      | [0.99]    |
| Rotherham             | Dermatitis | Neonatal   | Asthma      | Congenital  | URI         | Diarrhea    | Skin Viral  | ASD         | Iron        | Urticaria |
|                       | [1.45]     | [0.84]     | [1.07]      | [1.04]      | [1.29]      | [0.88]      | [0.83]      | [1.11]      | [2.6]       | [0.55]    |
| Sheffield             | Dermatitis | Neonatal   | Asthma      | Congenital  | URI         | Diarrhea    | Skin Viral  | ASD         | Iron        | Urticaria |
|                       | [1.43]     | [1.01]     | [1.18]      | [1.1]       | [1.28]      | [1.02]      | [0.87]      | [1.11]      | [6.22]      | [0.65]    |
| Wakefield             | Dermatitis | Neonatal   | Asthma      | Congenital  | URI         | Diarrhea    | Skin Viral  | ASD         | Iron        | Urticaria |
|                       | [1.45]     | [0.74]     | [1.09]      | [1.04]      | [1.29]      | [1.01]      | [0.84]      | [1.1]       | [2.87]      | [0.57]    |
| York                  | Dermatitis | Neonatal   | Asthma      | Congenital  | URI         | Diarrhea    | Skin Viral  | ASD         | Urticaria   | Falls     |
|                       | [1.43]     | [0.9]      | [1.26]      | [1.13]      | [1.26]      | [1.06]      | [0.9]       | [1.1]       | [0.7]       | [0.85]    |
| N Ireland             | Dermatitis | Neonatal   | Asthma      | Congenital  | URI         | Skin Viral  | Diarrhea    | ASD         | Falls       | Urticaria |
|                       | [1.19]     | [0.88]     | [0.99]      | [1.03]      | [1.29]      | [0.94]      | [0.75]      | [1.03]      | [0.98]      | [0.56]    |
| Scotland              | Dermatitis | Neonatal   | Asthma      | Congenital  | URI         | Skin Viral  | Diarrhea    | ASD         | Iron        | Urticaria |
|                       | [1.29]     | [0.82]     | [1.02]      | [1.2]       | [1.3]       | [0.91]      | [0.68]      | [1.04]      | [2.56]      | [0.52]    |

**eFigure 9c. Leading ten causes of YLDs with the ratio of observed YLDs to YLDs expected on the basis of Socio-Demographic Index alone in 2017, 1-4 years, both sexes combined.**  
The top ten causes contributing to YLDs are listed globally, by socio-demographic quintile, and then by GBD superregion, region, country, and subnationally where modeled. For each cell, the ratio of observed YLDs to YLDs expected on the basis of socio-demographic index (SDI) alone are listed. Abbreviations: YLD=year of life lived with disability, GBD=Global Burden of Disease.

Values shown in brackets represent the ratio of observed YLDs to predicted YLDs on the basis of Socio-Demographic Index (SDI), rounded to two (2) digits. Color ranges (shown below) were calculated to place a roughly equal number of cells into each bin.

| COLOR KEY:                  |                      | [0.0-0.72]           | [0.72-0.84]          | [0.84-0.92]          | [0.92-1.01]          | [1.01-1.09]          | [1.09-1.17]          | [1.17-1.32]          | [1.32-1.67]          | 1.67+                |
|-----------------------------|----------------------|----------------------|----------------------|----------------------|----------------------|----------------------|----------------------|----------------------|----------------------|----------------------|
|                             | 1                    | 2                    | 3                    | 4                    | 5                    | 6                    | 7                    | 8                    | 9                    | 10                   |
| Wales                       | Dermatitis<br>[1.21] | Neonatal<br>[0.82]   | Asthma<br>[1.02]     | Congenital<br>[1.02] | URI<br>[1.31]        | Skin Viral<br>[1.02] | Diarrhea<br>[0.74]   | ASD<br>[0.98]        | Falls<br>[1.12]      | Vit A<br>[1.03]      |
| Latin America and Caribbean | Neonatal<br>[1.13]   | Asthma<br>[1.32]     | Dermatitis<br>[0.88] | Diarrhea<br>[1.36]   | Vit A<br>[0.85]      | Iron<br>[0.98]       | Urticaria<br>[0.91]  | Congenital<br>[0.75] | Epilepsy<br>[1.28]   | Skin Viral<br>[0.82] |
| Andean Latin America        | Neonatal<br>[1.09]   | Dermatitis<br>[1.43] | Asthma<br>[1.81]     | Iron<br>[1.92]       | Diarrhea<br>[1.46]   | Vit A<br>[0.79]      | Urticaria<br>[0.88]  | Congenital<br>[0.68] | URI<br>[1.06]        | Skin Viral<br>[0.82] |
| Bolivia                     | Iron<br>[2.5]        | Neonatal<br>[1.06]   | Asthma<br>[1.98]     | Dermatitis<br>[1.53] | Diarrhea<br>[1.42]   | Vit A<br>[0.72]      | Urticaria<br>[0.87]  | Congenital<br>[0.7]  | Skin Viral<br>[0.85] | URI<br>[0.97]        |
| Ecuador                     | Neonatal<br>[1.12]   | Dermatitis<br>[1.3]  | Asthma<br>[1.66]     | Diarrhea<br>[1.14]   | Urticaria<br>[0.89]  | Congenital<br>[0.69] | Vit A<br>[0.52]      | Epilepsy<br>[1.24]   | Skin Viral<br>[0.82] | URI<br>[1.01]        |
| Peru                        | Neonatal<br>[1.1]    | Dermatitis<br>[1.47] | Asthma<br>[1.8]      | Iron<br>[2.1]        | Diarrhea<br>[1.57]   | Vit A<br>[0.88]      | Urticaria<br>[0.89]  | Congenital<br>[0.68] | URI<br>[1.12]        | Skin Viral<br>[0.82] |
| Caribbean                   | Asthma<br>[2.08]     | Neonatal<br>[0.94]   | Iron<br>[2.5]        | Dermatitis<br>[1.11] | Diarrhea<br>[1.41]   | Vit A<br>[1.16]      | Urticaria<br>[0.89]  | Congenital<br>[0.71] | Skin Viral<br>[0.81] | URI<br>[0.91]        |
| Antigua                     | Asthma<br>[2.4]      | Neonatal<br>[0.95]   | Dermatitis<br>[1.03] | Iron<br>[4.03]       | Diarrhea<br>[0.92]   | Vit A<br>[0.95]      | Urticaria<br>[0.98]  | Congenital<br>[0.66] | Skin Viral<br>[0.81] | URI<br>[0.87]        |
| Bahamas                     | Asthma<br>[2.6]      | Neonatal<br>[0.98]   | Dermatitis<br>[1.01] | Diarrhea<br>[1.12]   | Urticaria<br>[1.06]  | Congenital<br>[0.67] | Skin Viral<br>[0.81] | URI<br>[0.85]        | Iron<br>[1.71]       | Epilepsy<br>[1.19]   |
| Barbados                    | Asthma<br>[2.25]     | Neonatal<br>[1.04]   | Dermatitis<br>[1.0]  | Diarrhea<br>[1.11]   | Urticaria<br>[1.03]  | Congenital<br>[0.66] | Skin Viral<br>[0.81] | URI<br>[0.86]        | Iron<br>[1.32]       | Epilepsy<br>[1.08]   |
| Belize                      | Asthma<br>[2.23]     | Neonatal<br>[0.96]   | Dermatitis<br>[1.19] | Iron<br>[1.18]       | Vit A<br>[0.76]      | Urticaria<br>[0.87]  | Diarrhea<br>[0.57]   | Congenital<br>[0.68] | Skin Viral<br>[0.84] | URI<br>[0.98]        |
| Bermuda                     | Asthma<br>[3.24]     | Neonatal<br>[1.02]   | Dermatitis<br>[0.98] | Diarrhea<br>[1.46]   | Urticaria<br>[1.17]  | Congenital<br>[0.67] | Skin Viral<br>[0.83] | Iron<br>[4.08]       | URI<br>[0.83]        | Epilepsy<br>[1.26]   |
| Cuba                        | Asthma<br>[2.42]     | Neonatal<br>[0.88]   | Dermatitis<br>[1.06] | Iron<br>[1.55]       | Urticaria<br>[0.94]  | Congenital<br>[0.65] | Diarrhea<br>[0.63]   | Skin Viral<br>[0.81] | URI<br>[0.9]         | Scabies<br>[2.29]    |
| Dominica                    | Neonatal<br>[1.1]    | Asthma<br>[2.19]     | Dermatitis<br>[1.07] | Iron<br>[1.78]       | Diarrhea<br>[0.81]   | Urticaria<br>[0.94]  | Congenital<br>[0.69] | Skin Viral<br>[0.81] | Epilepsy<br>[1.19]   | URI<br>[0.89]        |
| Dominican Rep               | Neonatal<br>[0.99]   | Asthma<br>[1.57]     | Dermatitis<br>[1.2]  | Diarrhea<br>[1.61]   | Vit A<br>[0.62]      | Urticaria<br>[0.87]  | Congenital<br>[0.71] | Skin Viral<br>[0.84] | Iron<br>[0.4]        | Epilepsy<br>[0.82]   |
| Grenada                     | Asthma<br>[2.03]     | Neonatal<br>[1.01]   | Dermatitis<br>[1.11] | Iron<br>[2.28]       | Diarrhea<br>[1.14]   | Vit A<br>[0.78]      | Urticaria<br>[0.89]  | Congenital<br>[0.67] | Skin Viral<br>[0.82] | URI<br>[0.93]        |
| Guyana                      | Asthma<br>[2.03]     | Neonatal<br>[1.02]   | Dermatitis<br>[1.2]  | Iron<br>[1.11]       | Vit A<br>[0.57]      | Diarrhea<br>[0.75]   | Urticaria<br>[0.87]  | Congenital<br>[0.69] | Skin Viral<br>[0.85] | URI<br>[0.95]        |
| Haiti                       | Iron<br>[1.47]       | Asthma<br>[2.16]     | Vit A<br>[0.8]       | Neonatal<br>[0.98]   | Dermatitis<br>[1.25] | Diarrhea<br>[1.21]   | Congenital<br>[0.74] | Urticaria<br>[0.89]  | Skin Viral<br>[0.87] | URI<br>[1.1]         |
| Jamaica                     | Asthma<br>[2.31]     | Neonatal<br>[1.02]   | Dermatitis<br>[1.07] | Iron<br>[2.02]       | Vit A<br>[0.98]      | Urticaria<br>[0.93]  | Congenital<br>[0.66] | Diarrhea<br>[0.63]   | Skin Viral<br>[0.81] | Epilepsy<br>[1.17]   |
| Puerto Rico                 | Asthma<br>[3.96]     | Neonatal<br>[1.08]   | Dermatitis<br>[0.97] | Diarrhea<br>[1.4]    | Urticaria<br>[1.19]  | Congenital<br>[0.73] | Skin Viral<br>[0.83] | URI<br>[0.83]        | Epilepsy<br>[1.26]   | Vit A<br>[1.39]      |
| St Lucia                    | Asthma<br>[2.2]      | Neonatal<br>[1.03]   | Dermatitis<br>[1.1]  | Diarrhea<br>[1.18]   | Urticaria<br>[0.91]  | Congenital<br>[0.66] | Iron<br>[0.72]       | Skin Viral<br>[0.81] | Vit A<br>[0.49]      | URI<br>[0.91]        |
| St Vincent                  | Asthma<br>[2.1]      | Neonatal<br>[0.97]   | Dermatitis<br>[1.17] | Vit A<br>[0.93]      | Iron<br>[0.76]       | Diarrhea<br>[0.7]    | Urticaria<br>[0.88]  | Congenital<br>[0.67] | Skin Viral<br>[0.83] | URI<br>[0.96]        |
| Suriname                    | Asthma<br>[2.27]     | Neonatal<br>[1.01]   | Dermatitis<br>[1.12] | Vit A<br>[0.64]      | Urticaria<br>[0.89]  | Congenital<br>[0.69] | Iron<br>[0.69]       | Diarrhea<br>[0.58]   | Skin Viral<br>[0.82] | URI<br>[0.93]        |
| Trinidad Tobago             | Asthma<br>[2.49]     | Neonatal<br>[1.02]   | Dermatitis<br>[1.05] | Urticaria<br>[0.96]  | Congenital<br>[0.66] | Diarrhea<br>[0.64]   | Skin Viral<br>[0.81] | URI<br>[0.89]        | Iron<br>[0.87]       | Epilepsy<br>[1.02]   |
| Virgin Isl US               | Asthma<br>[2.91]     | Neonatal<br>[1.04]   | Dermatitis<br>[0.98] | Diarrhea<br>[1.63]   | Urticaria<br>[1.17]  | Congenital<br>[0.66] | Skin Viral<br>[0.83] | URI<br>[0.83]        | Epilepsy<br>[1.32]   | Vit A<br>[1.35]      |
| Central Latin America       | Neonatal<br>[1.34]   | Diarrhea<br>[1.49]   | Dermatitis<br>[0.78] | Asthma<br>[0.87]     | Vit A<br>[0.67]      | Epilepsy<br>[1.59]   | Urticaria<br>[0.9]   | Congenital<br>[0.71] | Iron<br>[0.54]       | Skin Viral<br>[0.82] |
| Colombia                    | Neonatal<br>[1.36]   | Dermatitis<br>[0.86] | Diarrhea<br>[1.38]   | Asthma<br>[0.95]     | Epilepsy<br>[1.61]   | Urticaria<br>[0.89]  | URI<br>[1.16]        | Congenital<br>[0.66] | Skin Viral<br>[0.82] | Vit A<br>[0.37]      |
| Costa Rica                  | Neonatal<br>[1.25]   | Asthma<br>[1.38]     | Diarrhea<br>[1.69]   | Dermatitis<br>[0.81] | Urticaria<br>[0.91]  | Epilepsy<br>[1.47]   | Congenital<br>[0.64] | Vit A<br>[0.54]      | Skin Viral<br>[0.81] | URI<br>[0.92]        |
| El Salvador                 | Neonatal<br>[1.35]   | Diarrhea<br>[1.56]   | Asthma<br>[1.2]      | Dermatitis<br>[0.82] | Vit A<br>[0.53]      | Urticaria<br>[0.87]  | Epilepsy<br>[1.32]   | Congenital<br>[0.72] | Skin Viral<br>[0.85] | Iron<br>[0.41]       |
| Guatemala                   | Neonatal<br>[1.32]   | Diarrhea<br>[2.09]   | Dermatitis<br>[1.01] | Iron<br>[0.66]       | Vit A<br>[0.55]      | Asthma<br>[0.8]      | Urticaria<br>[0.88]  | Congenital<br>[0.7]  | Skin Viral<br>[0.87] | Epilepsy<br>[0.96]   |
| Honduras                    | Neonatal<br>[1.45]   | Diarrhea<br>[1.68]   | Dermatitis<br>[1.01] | Asthma<br>[1.21]     | Vit A<br>[0.55]      | Epilepsy<br>[1.41]   | Iron<br>[0.32]       | Urticaria<br>[0.88]  | Congenital<br>[0.69] | Skin Viral<br>[0.87] |

**eFigure 9c. Leading ten causes of YLDs with the ratio of observed YLDs to YLDs expected on the basis of Socio-Demographic Index alone in 2017, 1-4 years, both sexes combined.**  
The top ten causes contributing to YLDs are listed globally, by socio-demographic quintile, and then by GBD superregion, region, country, and subnationally where modeled. For each cell, the ratio of observed YLDs to YLDs expected on the basis of socio-demographic index (SDI) alone are listed. Abbreviations: YLD=year of life lived with disability, GBD=Global Burden of Disease.

Values shown in brackets represent the ratio of observed YLDs to predicted YLDs on the basis of Socio-Demographic Index (SDI), rounded to two (2) digits. Color ranges (shown below) were calculated to place a roughly equal number of cells into each bin.

| COLOR KEY:      |                    | [0.0-0.72]           | [0.72-0.84]          | [0.84-0.92]          | [0.92-1.01]          | [1.01-1.09]          | [1.09-1.17]          | [1.17-1.32]          | [1.32-1.67]          | 1.67+                |
|-----------------|--------------------|----------------------|----------------------|----------------------|----------------------|----------------------|----------------------|----------------------|----------------------|----------------------|
|                 | 1                  | 2                    | 3                    | 4                    | 5                    | 6                    | 7                    | 8                    | 9                    | 10                   |
| Mexico          | Neonatal<br>[1.33] | Dermatitis<br>[0.65] | Diarrhea<br>[1.08]   | Vit A<br>[0.88]      | Asthma<br>[0.75]     | Epilepsy<br>[1.78]   | Urticaria<br>[0.93]  | Congenital<br>[0.74] | Iron<br>[0.64]       | Skin Viral<br>[0.82] |
| Aguascalientes  | Neonatal<br>[1.35] | Dermatitis<br>[0.64] | Diarrhea<br>[1.14]   | Asthma<br>[0.87]     | Epilepsy<br>[1.9]    | Congenital<br>[0.81] | Urticaria<br>[0.95]  | Vit A<br>[0.68]      | Skin Viral<br>[0.81] | URI<br>[0.92]        |
| Baja CA         | Neonatal<br>[1.31] | Dermatitis<br>[0.64] | Vit A<br>[0.92]      | Diarrhea<br>[0.9]    | Epilepsy<br>[1.84]   | Asthma<br>[0.65]     | Urticaria<br>[0.95]  | Congenital<br>[0.74] | Skin Viral<br>[0.81] | URI<br>[0.93]        |
| Baja CA Sur     | Neonatal<br>[1.4]  | Diarrhea<br>[1.27]   | Dermatitis<br>[0.64] | Vit A<br>[1.12]      | Asthma<br>[0.84]     | Epilepsy<br>[1.86]   | Urticaria<br>[0.95]  | Congenital<br>[0.76] | Skin Viral<br>[0.81] | URI<br>[0.92]        |
| Campeche        | Neonatal<br>[1.44] | Vit A<br>[0.95]      | Diarrhea<br>[1.14]   | Dermatitis<br>[0.67] | Asthma<br>[0.76]     | Epilepsy<br>[1.64]   | Urticaria<br>[0.92]  | Congenital<br>[0.73] | Iron<br>[0.55]       | Skin Viral<br>[0.83] |
| Chiapas         | Neonatal<br>[1.35] | Diarrhea<br>[1.24]   | Vit A<br>[0.76]      | Dermatitis<br>[0.72] | Asthma<br>[0.74]     | Epilepsy<br>[1.58]   | Urticaria<br>[0.92]  | Congenital<br>[0.69] | Iron<br>[0.28]       | Skin Viral<br>[0.86] |
| Chihuahua       | Neonatal<br>[1.24] | Diarrhea<br>[1.23]   | Asthma<br>[0.87]     | Dermatitis<br>[0.56] | Vit A<br>[0.83]      | Epilepsy<br>[1.84]   | Congenital<br>[0.82] | Urticaria<br>[0.94]  | Skin Viral<br>[0.81] | URI<br>[0.94]        |
| Coahuila        | Neonatal<br>[1.14] | Diarrhea<br>[1.45]   | Dermatitis<br>[0.65] | Asthma<br>[0.87]     | Epilepsy<br>[1.82]   | Vit A<br>[0.74]      | Urticaria<br>[0.94]  | Congenital<br>[0.71] | Skin Viral<br>[0.81] | URI<br>[0.93]        |
| Colima          | Neonatal<br>[1.43] | Dermatitis<br>[0.64] | Asthma<br>[0.8]      | Vit A<br>[0.84]      | Diarrhea<br>[0.89]   | Epilepsy<br>[1.87]   | Urticaria<br>[0.95]  | Congenital<br>[0.7]  | Skin Viral<br>[0.81] | URI<br>[0.92]        |
| Mexico City     | Neonatal<br>[1.44] | Dermatitis<br>[0.77] | Diarrhea<br>[1.17]   | Epilepsy<br>[2.3]    | Vit A<br>[1.26]      | Asthma<br>[0.69]     | Congenital<br>[0.8]  | Urticaria<br>[1.03]  | Skin Viral<br>[0.8]  | URI<br>[0.88]        |
| Durango         | Neonatal<br>[1.2]  | Dermatitis<br>[0.86] | Diarrhea<br>[1.11]   | Asthma<br>[0.84]     | Epilepsy<br>[1.76]   | Vit A<br>[0.6]       | Urticaria<br>[0.92]  | Congenital<br>[0.74] | Iron<br>[0.66]       | Skin Viral<br>[0.82] |
| Guanajuato      | Neonatal<br>[1.2]  | Vit A<br>[0.99]      | Dermatitis<br>[0.67] | Asthma<br>[0.83]     | Diarrhea<br>[0.91]   | Epilepsy<br>[1.78]   | Urticaria<br>[0.92]  | Congenital<br>[0.75] | ASD<br>[1.54]        | Skin Viral<br>[0.82] |
| Guerrero        | Neonatal<br>[1.42] | Dermatitis<br>[0.71] | Diarrhea<br>[0.97]   | Asthma<br>[0.76]     | Vit A<br>[0.54]      | Epilepsy<br>[1.59]   | Iron<br>[0.41]       | Urticaria<br>[0.92]  | Congenital<br>[0.7]  | Skin Viral<br>[0.9]  |
| Hidalgo         | Neonatal<br>[1.61] | Dermatitis<br>[0.7]  | Asthma<br>[0.79]     | Diarrhea<br>[0.77]   | Epilepsy<br>[1.65]   | Vit A<br>[0.49]      | Urticaria<br>[0.91]  | Congenital<br>[0.73] | Skin Viral<br>[0.85] | Iron<br>[0.38]       |
| Jalisco         | Neonatal<br>[1.3]  | Dermatitis<br>[0.65] | Vit A<br>[0.95]      | Epilepsy<br>[2.19]   | Diarrhea<br>[0.95]   | Asthma<br>[0.67]     | Congenital<br>[0.79] | Urticaria<br>[0.94]  | Skin Viral<br>[0.81] | URI<br>[0.93]        |
| Mexico          | Neonatal<br>[1.56] | Vit A<br>[1.23]      | Iron<br>[1.25]       | Diarrhea<br>[1.11]   | Dermatitis<br>[0.57] | Epilepsy<br>[1.76]   | Asthma<br>[0.64]     | Urticaria<br>[0.93]  | Congenital<br>[0.67] | Skin Viral<br>[0.82] |
| Michoacan       | Neonatal<br>[1.15] | Dermatitis<br>[0.7]  | Asthma<br>[0.79]     | Vit A<br>[0.59]      | Diarrhea<br>[0.78]   | Epilepsy<br>[1.61]   | Urticaria<br>[0.91]  | Congenital<br>[0.72] | Skin Viral<br>[0.85] | Iron<br>[0.36]       |
| Morelos         | Neonatal<br>[1.3]  | Dermatitis<br>[0.56] | Asthma<br>[0.71]     | Vit A<br>[0.76]      | Epilepsy<br>[1.8]    | Diarrhea<br>[0.8]    | Congenital<br>[0.79] | Urticaria<br>[0.93]  | Iron<br>[0.61]       | Skin Viral<br>[0.82] |
| Nayarit         | Neonatal<br>[1.43] | Dermatitis<br>[0.67] | Diarrhea<br>[1.12]   | Asthma<br>[0.79]     | Epilepsy<br>[1.68]   | Urticaria<br>[0.92]  | Congenital<br>[0.76] | Vit A<br>[0.43]      | Skin Viral<br>[0.82] | URI<br>[0.96]        |
| Nuevo Leon      | Neonatal<br>[1.1]  | Diarrhea<br>[1.21]   | Dermatitis<br>[0.54] | Epilepsy<br>[1.96]   | Asthma<br>[0.66]     | Vit A<br>[0.79]      | Urticaria<br>[0.97]  | Congenital<br>[0.74] | Iron<br>[0.98]       | Skin Viral<br>[0.81] |
| Oaxaca          | Neonatal<br>[1.33] | Diarrhea<br>[1.14]   | Dermatitis<br>[0.71] | Asthma<br>[0.76]     | Vit A<br>[0.51]      | Epilepsy<br>[1.71]   | Urticaria<br>[0.92]  | Congenital<br>[0.78] | Skin Viral<br>[0.86] | Iron<br>[0.29]       |
| Puebla          | Neonatal<br>[1.25] | Dermatitis<br>[0.7]  | Diarrhea<br>[0.96]   | Asthma<br>[0.79]     | Vit A<br>[0.59]      | Urticaria<br>[0.91]  | Congenital<br>[0.74] | Epilepsy<br>[1.17]   | Skin Viral<br>[0.85] | Iron<br>[0.35]       |
| Queretaro       | Neonatal<br>[1.4]  | Dermatitis<br>[0.65] | Vit A<br>[0.93]      | Asthma<br>[0.83]     | Iron<br>[1.0]        | Epilepsy<br>[1.79]   | Diarrhea<br>[0.8]    | Urticaria<br>[0.93]  | Congenital<br>[0.72] | Skin Viral<br>[0.82] |
| Quintana Roo    | Neonatal<br>[1.67] | Diarrhea<br>[1.41]   | Dermatitis<br>[0.67] | Vit A<br>[0.88]      | Asthma<br>[0.76]     | Epilepsy<br>[1.77]   | Urticaria<br>[0.92]  | Congenital<br>[0.77] | Skin Viral<br>[0.82] | URI<br>[0.95]        |
| San Luis Potosi | Neonatal<br>[1.16] | Vit A<br>[1.06]      | Dermatitis<br>[0.67] | Asthma<br>[0.82]     | Diarrhea<br>[0.89]   | Epilepsy<br>[1.8]    | Congenital<br>[0.81] | Urticaria<br>[0.92]  | Skin Viral<br>[0.83] | URI<br>[0.96]        |
| Sinaloa         | Neonatal<br>[1.22] | Vit A<br>[1.31]      | Dermatitis<br>[0.64] | Diarrhea<br>[1.15]   | Asthma<br>[0.8]      | Epilepsy<br>[1.78]   | Iron<br>[0.97]       | Urticaria<br>[0.94]  | Congenital<br>[0.7]  | Skin Viral<br>[0.81] |
| Sonora          | Neonatal<br>[1.19] | Vit A<br>[1.19]      | Dermatitis<br>[0.64] | Diarrhea<br>[1.13]   | Asthma<br>[0.84]     | Epilepsy<br>[1.87]   | Congenital<br>[0.8]  | Urticaria<br>[0.94]  | Iron<br>[0.69]       | Skin Viral<br>[0.81] |
| Tabasco         | Neonatal<br>[1.44] | Diarrhea<br>[1.22]   | Dermatitis<br>[0.67] | Vit A<br>[0.79]      | Iron<br>[0.92]       | Asthma<br>[0.69]     | Epilepsy<br>[1.71]   | Congenital<br>[0.83] | Urticaria<br>[0.92]  | Skin Viral<br>[0.83] |
| Tamaulipas      | Neonatal<br>[1.46] | Vit A<br>[1.24]      | Diarrhea<br>[1.34]   | Asthma<br>[0.79]     | Dermatitis<br>[0.54] | Epilepsy<br>[1.77]   | Urticaria<br>[0.94]  | Congenital<br>[0.75] | Iron<br>[0.74]       | Skin Viral<br>[0.81] |
| Tlaxcala        | Neonatal<br>[1.42] | Dermatitis<br>[0.69] | Asthma<br>[0.81]     | Diarrhea<br>[0.95]   | Epilepsy<br>[1.76]   | Congenital<br>[0.81] | Urticaria<br>[0.92]  | Vit A<br>[0.45]      | Iron<br>[0.48]       | Skin Viral<br>[0.83] |
| Veracruz        | Neonatal<br>[1.41] | Dermatitis<br>[0.7]  | Iron<br>[0.83]       | Diarrhea<br>[1.0]    | Asthma<br>[0.75]     | Epilepsy<br>[1.68]   | Vit A<br>[0.54]      | Urticaria<br>[0.91]  | Congenital<br>[0.77] | Skin Viral<br>[0.84] |

**eFigure 9c. Leading ten causes of YLDs with the ratio of observed YLDs to YLDs expected on the basis of Socio-Demographic Index alone in 2017, 1-4 years, both sexes combined.**  
The top ten causes contributing to YLDs are listed globally, by socio-demographic quintile, and then by GBD superregion, region, country, and subnationally where modeled. For each cell, the ratio of observed YLDs to YLDs expected on the basis of socio-demographic index (SDI) alone are listed. Abbreviations: YLD=year of life lived with disability, GBD=Global Burden of Disease.

Values shown in brackets represent the ratio of observed YLDs to predicted YLDs on the basis of Socio-Demographic Index (SDI), rounded to two (2) digits. Color ranges (shown below) were calculated to place a roughly equal number of cells into each bin.

| COLOR KEY:                    |                    | [0.0-0.72]           | [0.72-0.84]          | [0.84-0.92]          | [0.92-1.01]          | [1.01-1.09]          | [1.09-1.17]          | [1.17-1.32]          | [1.32-1.67]          | 1.67+                |
|-------------------------------|--------------------|----------------------|----------------------|----------------------|----------------------|----------------------|----------------------|----------------------|----------------------|----------------------|
|                               | 1                  | 2                    | 3                    | 4                    | 5                    | 6                    | 7                    | 8                    | 9                    | 10                   |
| Yucatan                       | Neonatal<br>[1.24] | Dermatitis<br>[0.63] | Diarrhea<br>[0.99]   | Vit A<br>[0.83]      | Asthma<br>[0.73]     | Epilepsy<br>[1.77]   | Congenital<br>[0.78] | Urticaria<br>[0.93]  | Skin Viral<br>[0.82] | URI<br>[0.94]        |
| Zacatecas                     | Neonatal<br>[0.93] | Dermatitis<br>[0.68] | Asthma<br>[0.83]     | Diarrhea<br>[0.9]    | Vit A<br>[0.67]      | Epilepsy<br>[1.77]   | Urticaria<br>[0.92]  | Congenital<br>[0.69] | Skin Viral<br>[0.83] | URI<br>[0.98]        |
| Nicaragua                     | Neonatal<br>[1.35] | Diarrhea<br>[1.48]   | Dermatitis<br>[1.01] | Asthma<br>[0.92]     | Iron<br>[0.51]       | Congenital<br>[0.75] | Urticaria<br>[0.88]  | Epilepsy<br>[1.17]   | Skin Viral<br>[0.87] | URI<br>[0.88]        |
| Panama                        | Neonatal<br>[1.24] | Diarrhea<br>[2.19]   | Dermatitis<br>[1.01] | Asthma<br>[1.33]     | Iron<br>[1.53]       | Urticaria<br>[0.92]  | Vit A<br>[0.7]       | Congenital<br>[0.65] | Skin Viral<br>[0.81] | Epilepsy<br>[1.25]   |
| Venezuela                     | Neonatal<br>[1.34] | Diarrhea<br>[2.4]    | Dermatitis<br>[0.9]  | Asthma<br>[1.02]     | Epilepsy<br>[1.5]    | Urticaria<br>[0.9]   | Congenital<br>[0.67] | Skin Viral<br>[0.81] | URI<br>[0.92]        | ASD<br>[0.78]        |
| <b>Tropical Latin America</b> | Neonatal<br>[0.89] | Asthma<br>[1.62]     | Dermatitis<br>[0.77] | Vit A<br>[1.1]       | Diarrhea<br>[1.08]   | Congenital<br>[0.85] | Urticaria<br>[0.95]  | Iron<br>[0.82]       | Skin Viral<br>[0.81] | Scabies<br>[2.96]    |
| Brazil                        | Neonatal<br>[0.89] | Asthma<br>[1.62]     | Dermatitis<br>[0.75] | Vit A<br>[1.13]      | Diarrhea<br>[1.03]   | Congenital<br>[0.85] | Urticaria<br>[0.95]  | Iron<br>[0.84]       | Skin Viral<br>[0.81] | Scabies<br>[3.06]    |
| Acre                          | Neonatal<br>[0.93] | Asthma<br>[1.38]     | Iron<br>[1.37]       | Dermatitis<br>[0.83] | Diarrhea<br>[1.15]   | Vit A<br>[0.84]      | Congenital<br>[0.99] | Urticaria<br>[0.91]  | Skin Viral<br>[0.83] | URI<br>[0.94]        |
| Alagoas                       | Neonatal<br>[0.79] | Asthma<br>[1.22]     | Vit A<br>[0.66]      | Diarrhea<br>[1.02]   | Dermatitis<br>[0.71] | Iron<br>[0.57]       | Congenital<br>[0.87] | Urticaria<br>[0.92]  | Skin Viral<br>[0.85] | Scabies<br>[1.87]    |
| Amapa                         | Neonatal<br>[0.92] | Asthma<br>[1.53]     | Dermatitis<br>[0.76] | Vit A<br>[1.04]      | Iron<br>[1.29]       | Congenital<br>[0.83] | Diarrhea<br>[0.76]   | Urticaria<br>[0.95]  | Skin Viral<br>[0.81] | Scabies<br>[2.89]    |
| Amazonas                      | Neonatal<br>[0.79] | Asthma<br>[1.5]      | Dermatitis<br>[0.79] | Vit A<br>[0.96]      | Diarrhea<br>[0.88]   | Iron<br>[0.82]       | Congenital<br>[0.84] | Urticaria<br>[0.93]  | Skin Viral<br>[0.82] | Scabies<br>[2.51]    |
| Bahia                         | Neonatal<br>[0.87] | Dermatitis<br>[1.09] | Asthma<br>[1.38]     | Vit A<br>[1.09]      | Diarrhea<br>[1.21]   | Congenital<br>[0.86] | Urticaria<br>[0.91]  | Skin Viral<br>[0.84] | Scabies<br>[2.01]    | URI<br>[0.95]        |
| Ceara                         | Neonatal<br>[0.82] | Asthma<br>[1.41]     | Dermatitis<br>[0.83] | Vit A<br>[0.92]      | Diarrhea<br>[1.02]   | Iron<br>[0.68]       | Congenital<br>[0.88] | Urticaria<br>[0.91]  | Scabies<br>[2.47]    | Skin Viral<br>[0.83] |
| Distrito Federal              | Neonatal<br>[1.03] | Asthma<br>[2.02]     | Dermatitis<br>[0.68] | Congenital<br>[0.93] | Urticaria<br>[1.18]  | Diarrhea<br>[0.94]   | Vit A<br>[1.63]      | Skin Viral<br>[0.82] | Scabies<br>[7.38]    | URI<br>[0.8]         |
| Espirito Santo                | Asthma<br>[1.87]   | Neonatal<br>[0.87]   | Dermatitis<br>[0.75] | Vit A<br>[1.15]      | Diarrhea<br>[0.87]   | Congenital<br>[0.84] | Iron<br>[1.18]       | Urticaria<br>[0.97]  | Skin Viral<br>[0.8]  | Scabies<br>[3.18]    |
| Goiás                         | Asthma<br>[1.65]   | Neonatal<br>[0.8]    | Dermatitis<br>[0.77] | Vit A<br>[0.99]      | Diarrhea<br>[0.96]   | Congenital<br>[0.84] | Urticaria<br>[0.94]  | Skin Viral<br>[0.81] | Scabies<br>[2.75]    | Iron<br>[0.61]       |
| Maranhao                      | Vit A<br>[0.95]    | Neonatal<br>[0.84]   | Asthma<br>[1.23]     | Dermatitis<br>[0.86] | Diarrhea<br>[0.85]   | Iron<br>[0.32]       | Congenital<br>[0.82] | Urticaria<br>[0.92]  | Skin Viral<br>[0.86] | Scabies<br>[1.76]    |
| Mato Grosso                   | Asthma<br>[1.72]   | Neonatal<br>[0.84]   | Dermatitis<br>[0.76] | Diarrhea<br>[1.02]   | Vit A<br>[0.89]      | Iron<br>[1.07]       | Congenital<br>[0.83] | Urticaria<br>[0.95]  | Skin Viral<br>[0.81] | Scabies<br>[2.92]    |
| Mato Grosso do Sul            | Neonatal<br>[0.94] | Asthma<br>[1.57]     | Dermatitis<br>[0.77] | Vit A<br>[1.3]       | Diarrhea<br>[1.08]   | Congenital<br>[0.95] | Iron<br>[1.0]        | Urticaria<br>[0.94]  | Skin Viral<br>[0.81] | Scabies<br>[2.75]    |
| Minas Gerais                  | Neonatal<br>[0.93] | Asthma<br>[1.72]     | Dermatitis<br>[0.66] | Diarrhea<br>[1.14]   | Vit A<br>[1.01]      | Congenital<br>[0.84] | Urticaria<br>[0.95]  | Skin Viral<br>[0.81] | Scabies<br>[2.91]    | URI<br>[0.88]        |
| Para                          | Neonatal<br>[0.82] | Asthma<br>[1.42]     | Diarrhea<br>[1.37]   | Iron<br>[1.02]       | Vit A<br>[0.92]      | Dermatitis<br>[0.85] | Congenital<br>[0.84] | Urticaria<br>[0.91]  | Scabies<br>[2.1]     | Skin Viral<br>[0.84] |
| Paraiba                       | Neonatal<br>[0.77] | Asthma<br>[1.31]     | Dermatitis<br>[0.85] | Diarrhea<br>[1.12]   | Vit A<br>[0.72]      | Congenital<br>[0.86] | Iron<br>[0.45]       | Urticaria<br>[0.91]  | Skin Viral<br>[0.85] | Scabies<br>[1.94]    |
| Parana                        | Asthma<br>[1.87]   | Neonatal<br>[0.91]   | Dermatitis<br>[0.67] | Vit A<br>[1.22]      | Diarrhea<br>[0.93]   | Congenital<br>[0.91] | Urticaria<br>[0.97]  | Skin Viral<br>[0.8]  | Iron<br>[0.86]       | Scabies<br>[3.3]     |
| Pernambuco                    | Neonatal<br>[0.82] | Asthma<br>[1.47]     | Dermatitis<br>[0.81] | Vit A<br>[0.81]      | Diarrhea<br>[0.88]   | Congenital<br>[0.91] | Urticaria<br>[0.91]  | Iron<br>[0.49]       | Skin Viral<br>[0.84] | Scabies<br>[2.06]    |
| Piaui                         | Neonatal<br>[0.89] | Asthma<br>[1.37]     | Dermatitis<br>[0.86] | Diarrhea<br>[0.94]   | Vit A<br>[0.47]      | Congenital<br>[0.88] | Urticaria<br>[0.92]  | Skin Viral<br>[0.86] | Scabies<br>[1.85]    | URI<br>[0.97]        |
| Rio de Janeiro                | Neonatal<br>[1.13] | Asthma<br>[1.71]     | Dermatitis<br>[0.73] | Vit A<br>[1.21]      | Congenital<br>[0.83] | Urticaria<br>[1.02]  | Diarrhea<br>[0.78]   | Epilepsy<br>[1.34]   | Skin Viral<br>[0.8]  | Scabies<br>[4.09]    |
| Rio Grande do Norte           | Neonatal<br>[0.75] | Asthma<br>[1.41]     | Vit A<br>[1.22]      | Dermatitis<br>[0.82] | Diarrhea<br>[1.3]    | Congenital<br>[0.84] | Urticaria<br>[0.91]  | Skin Viral<br>[0.83] | Iron<br>[0.44]       | Scabies<br>[2.13]    |
| Rio Grande do Sul             | Asthma<br>[1.99]   | Neonatal<br>[0.95]   | Dermatitis<br>[0.95] | Congenital<br>[1.4]  | Epilepsy<br>[2.23]   | Vit A<br>[0.99]      | Diarrhea<br>[0.83]   | Urticaria<br>[0.99]  | Iron<br>[1.21]       | Skin Viral<br>[0.8]  |
| Rondonia                      | Neonatal<br>[0.96] | Asthma<br>[1.44]     | Dermatitis<br>[0.81] | Congenital<br>[1.42] | Vit A<br>[0.98]      | Diarrhea<br>[0.76]   | Urticaria<br>[0.92]  | Scabies<br>[2.55]    | Skin Viral<br>[0.82] | URI<br>[0.92]        |
| Roraima                       | Neonatal<br>[0.97] | Asthma<br>[1.47]     | Dermatitis<br>[0.78] | Vit A<br>[0.9]       | Diarrhea<br>[0.88]   | Iron<br>[1.01]       | Congenital<br>[0.84] | Urticaria<br>[0.94]  | Skin Viral<br>[0.81] | Scabies<br>[2.67]    |
| Santa Catarina                | Asthma<br>[2.06]   | Neonatal<br>[0.85]   | Dermatitis<br>[0.73] | Vit A<br>[1.29]      | Congenital<br>[0.89] | Diarrhea<br>[0.83]   | Iron<br>[1.39]       | Urticaria<br>[1.0]   | Skin Viral<br>[0.8]  | Scabies<br>[3.8]     |

**eFigure 9c. Leading ten causes of YLDs with the ratio of observed YLDs to YLDs expected on the basis of Socio-Demographic Index alone in 2017, 1-4 years, both sexes combined.**  
The top ten causes contributing to YLDs are listed globally, by socio-demographic quintile, and then by GBD superregion, region, country, and subnationally where modeled. For each cell, the ratio of observed YLDs to YLDs expected on the basis of socio-demographic index (SDI) alone are listed. Abbreviations: YLD=year of life lived with disability, GBD=Global Burden of Disease.

Values shown in brackets represent the ratio of observed YLDs to predicted YLDs on the basis of Socio-Demographic Index (SDI), rounded to two (2) digits. Color ranges (shown below) were calculated to place a roughly equal number of cells into each bin.

| COLOR KEY:                   |                    | [0.0-0.72]           | [0.72-0.84]          | [0.84-0.92]                      | [0.92-1.01]          | [1.01-1.09]          | [1.09-1.17]          | [1.17-1.32]          | [1.32-1.67]          | 1.67+                |
|------------------------------|--------------------|----------------------|----------------------|----------------------------------|----------------------|----------------------|----------------------|----------------------|----------------------|----------------------|
|                              | 1                  | 2                    | 3                    | 4                                | 5                    | 6                    | 7                    | 8                    | 9                    | 10                   |
| Sao Paulo                    | Neonatal<br>[0.98] | Asthma<br>[1.91]     | Dermatitis<br>[0.63] | Urticaria<br>[1.04]              | Congenital<br>[0.72] | Diarrhea<br>[0.77]   | Skin Viral<br>[0.8]  | Scabies<br>[4.36]    | URI<br>[0.84]        | Vit A<br>[0.67]      |
| Sergipe                      | Neonatal<br>[0.95] | Asthma<br>[1.49]     | Vit A<br>[1.21]      | Dermatitis<br>[0.68]             | Diarrhea<br>[0.81]   | Congenital<br>[0.84] | Iron<br>[0.66]       | Urticaria<br>[0.92]  | Skin Viral<br>[0.83] | Scabies<br>[2.25]    |
| Tocantins                    | Neonatal<br>[0.93] | Asthma<br>[1.41]     | Vit A<br>[1.26]      | Dermatitis<br>[0.82]             | Iron<br>[1.04]       | Diarrhea<br>[0.92]   | Congenital<br>[0.83] | Urticaria<br>[0.91]  | Skin Viral<br>[0.83] | Scabies<br>[2.19]    |
| Paraguay                     | Asthma<br>[1.83]   | Diarrhea<br>[2.11]   | Neonatal<br>[0.77]   | Dermatitis<br>[1.04]             | Vit A<br>[0.84]      | Iron<br>[0.86]       | Congenital<br>[0.89] | Urticaria<br>[0.88]  | Skin Viral<br>[0.83] | Scabies<br>[2.31]    |
| North Africa and Middle East | Neonatal<br>[1.01] | Iron<br>[2.44]       | Diarrhea<br>[1.89]   | Asthma<br>[1.07]                 | Dermatitis<br>[0.64] | Vit A<br>[0.95]      | Congenital<br>[0.84] | Urticaria<br>[0.96]  | Epilepsy<br>[1.3]    | Skin Viral<br>[0.8]  |
| Afghanistan                  | Diarrhea<br>[1.52] | Neonatal<br>[1.08]   | Vit A<br>[0.4]       | Iron<br>[0.36]                   | Dermatitis<br>[0.94] | Asthma<br>[1.2]      | ID<br>[4.19]         | Congenital<br>[0.85] | Urticaria<br>[1.03]  | Epilepsy<br>[0.9]    |
| Algeria                      | Neonatal<br>[1.11] | Asthma<br>[1.25]     | Diarrhea<br>[1.52]   | Dermatitis<br>[0.64]             | Iron<br>[1.46]       | Congenital<br>[0.82] | Urticaria<br>[1.02]  | Epilepsy<br>[1.36]   | Vit A<br>[0.66]      | Skin Viral<br>[0.79] |
| Bahrain                      | Neonatal<br>[1.04] | Dermatitis<br>[0.72] | Asthma<br>[1.17]     | Diarrhea<br>[1.59]               | Urticaria<br>[1.05]  | Congenital<br>[0.75] | Epilepsy<br>[1.4]    | Skin Viral<br>[0.79] | URI<br>[0.86]        | Blindness<br>[1.36]  |
| Egypt                        | Neonatal<br>[1.05] | Diarrhea<br>[1.73]   | Asthma<br>[1.27]     | Iron<br>[1.03]                   | Dermatitis<br>[0.57] | Urticaria<br>[0.98]  | Congenital<br>[0.81] | Epilepsy<br>[1.42]   | Skin Viral<br>[0.82] | Vit A<br>[0.37]      |
| Iran                         | Neonatal<br>[1.32] | Diarrhea<br>[1.27]   | Asthma<br>[0.86]     | Dermatitis<br>[0.51]             | Congenital<br>[0.93] | Iron<br>[1.61]       | Urticaria<br>[1.07]  | Epilepsy<br>[1.59]   | Skin Viral<br>[0.78] | URI<br>[0.89]        |
| Iraq                         | Neonatal<br>[1.12] | Iron<br>[1.33]       | Asthma<br>[1.1]      | Vit A<br>[0.8]                   | Dermatitis<br>[0.65] | Diarrhea<br>[0.94]   | Congenital<br>[0.82] | Urticaria<br>[0.94]  | Epilepsy<br>[1.22]   | Skin Viral<br>[0.83] |
| Jordan                       | Neonatal<br>[1.41] | Asthma<br>[1.46]     | Diarrhea<br>[1.53]   | Dermatitis<br>[0.64]             | Vit A<br>[1.17]      | Iron<br>[1.75]       | Congenital<br>[0.8]  | Urticaria<br>[1.02]  | Epilepsy<br>[1.28]   | Skin Viral<br>[0.79] |
| Kuwait                       | Neonatal<br>[1.21] | Asthma<br>[1.53]     | Diarrhea<br>[1.94]   | Dermatitis<br>[0.61]             | Urticaria<br>[1.2]   | Congenital<br>[0.83] | Skin Viral<br>[0.8]  | Epilepsy<br>[1.55]   | URI<br>[0.83]        | Vit A<br>[1.28]      |
| Lebanon                      | Neonatal<br>[1.06] | Asthma<br>[1.64]     | Diarrhea<br>[1.83]   | Dermatitis<br>[0.73]             | Congenital<br>[0.86] | Urticaria<br>[1.08]  | Iron<br>[1.59]       | Skin Viral<br>[0.79] | Epilepsy<br>[1.29]   | URI<br>[0.86]        |
| Libya                        | Neonatal<br>[1.09] | Diarrhea<br>[2.24]   | Dermatitis<br>[0.69] | Asthma<br>[1.24]                 | Iron<br>[3.77]       | Congenital<br>[0.84] | Urticaria<br>[1.14]  | Skin Viral<br>[0.8]  | Vit A<br>[1.06]      | URI<br>[0.84]        |
| Morocco                      | Neonatal<br>[1.06] | Iron<br>[0.93]       | Diarrhea<br>[1.2]    | Dermatitis<br>[0.78]             | Asthma<br>[0.81]     | Vit A<br>[0.62]      | Congenital<br>[0.85] | Urticaria<br>[0.94]  | Epilepsy<br>[1.14]   | Skin Viral<br>[0.83] |
| Palestine                    | Neonatal<br>[1.06] | Asthma<br>[1.15]     | Diarrhea<br>[1.18]   | Dermatitis<br>[0.77]             | Vit A<br>[0.53]      | Congenital<br>[0.81] | Urticaria<br>[0.94]  | Iron<br>[0.32]       | Epilepsy<br>[1.04]   | Skin Viral<br>[0.85] |
| Oman                         | Neonatal<br>[1.11] | Iron<br>[4.92]       | Diarrhea<br>[1.99]   | Asthma<br>[1.09]                 | Dermatitis<br>[0.57] | Congenital<br>[0.84] | Urticaria<br>[1.11]  | Vit A<br>[1.09]      | Skin Viral<br>[0.79] | Epilepsy<br>[1.4]    |
| Qatar                        | Neonatal<br>[1.02] | Dermatitis<br>[0.69] | Asthma<br>[1.1]      | Diarrhea<br>[1.16]               | Congenital<br>[0.82] | Urticaria<br>[1.16]  | Epilepsy<br>[1.53]   | Skin Viral<br>[0.8]  | URI<br>[0.84]        | Blindness<br>[1.54]  |
| Saudi Arabia                 | Neonatal<br>[0.78] | Dermatitis<br>[0.69] | Diarrhea<br>[2.01]   | Asthma<br>[0.94]                 | Congenital<br>[0.91] | Urticaria<br>[1.19]  | Epilepsy<br>[1.66]   | Skin Viral<br>[0.8]  | URI<br>[0.83]        | Blindness<br>[1.12]  |
| Sudan                        | Iron<br>[1.29]     | Diarrhea<br>[2.34]   | Neonatal<br>[0.86]   | Vit A<br>[0.66]                  | Asthma<br>[1.08]     | PEM<br>[8.25]        | Dermatitis<br>[0.72] | Congenital<br>[0.84] | ID<br>[4.5]          | Urticaria<br>[0.94]  |
| Syria                        | Neonatal<br>[0.99] | PEM<br>[127.54]      | Iron<br>[1.37]       | Conflict<br>Terror<br>[17710.55] | Asthma<br>[0.99]     | Diarrhea<br>[1.04]   | Dermatitis<br>[0.54] | Vit A<br>[0.66]      | Congenital<br>[0.82] | Urticaria<br>[0.94]  |
| Tunisia                      | Neonatal<br>[1.04] | Dermatitis<br>[0.72] | Diarrhea<br>[1.36]   | Asthma<br>[0.96]                 | Iron<br>[1.31]       | Urticaria<br>[0.99]  | Congenital<br>[0.76] | Skin Viral<br>[0.8]  | URI<br>[0.89]        | Epilepsy<br>[1.06]   |
| Turkey                       | Neonatal<br>[0.81] | Asthma<br>[1.09]     | Dermatitis<br>[0.58] | Diarrhea<br>[1.28]               | Vit A<br>[1.09]      | Urticaria<br>[1.05]  | Congenital<br>[0.78] | Epilepsy<br>[1.52]   | URI<br>[1.01]        | Skin Viral<br>[0.79] |
| UAE                          | Neonatal<br>[1.09] | Asthma<br>[1.7]      | Diarrhea<br>[2.16]   | Dermatitis<br>[0.68]             | Congenital<br>[0.88] | PEM<br>[3624.32]     | Urticaria<br>[1.22]  | Epilepsy<br>[1.82]   | Skin Viral<br>[0.81] | URI<br>[0.82]        |
| Yemen                        | Iron<br>[3.88]     | Vit A<br>[1.27]      | Diarrhea<br>[2.39]   | Neonatal<br>[1.12]               | PEM<br>[5.8]         | Dermatitis<br>[0.86] | Oth NTD<br>[2.58]    | Asthma<br>[0.87]     | Hemog<br>[2.92]      | Oth Un Inf<br>[4.13] |
| South Asia                   | Iron<br>[1.94]     | Neonatal<br>[1.42]   | Vit A<br>[1.16]      | PEM<br>[30.67]                   | Dermatitis<br>[0.54] | Congenital<br>[1.0]  | ID<br>[5.5]          | Diarrhea<br>[0.58]   | Urticaria<br>[0.92]  | Skin Viral<br>[0.84] |
| Bangladesh                   | Neonatal<br>[1.37] | Iron<br>[0.96]       | Vit A<br>[0.46]      | Dermatitis<br>[0.75]             | PEM<br>[6.2]         | Congenital<br>[0.95] | Urticaria<br>[0.94]  | Diarrhea<br>[0.4]    | Skin Viral<br>[0.85] | URI<br>[1.1]         |
| Bhutan                       | Iron<br>[4.45]     | Neonatal<br>[1.33]   | Vit A<br>[1.33]      | Dermatitis<br>[0.73]             | Diarrhea<br>[0.82]   | Congenital<br>[0.8]  | Urticaria<br>[0.91]  | Oth NTD<br>[4.42]    | Skin Viral<br>[0.83] | Epilepsy<br>[1.01]   |
| India                        | Iron<br>[2.09]     | Neonatal<br>[1.44]   | Vit A<br>[1.34]      | PEM<br>[44.45]                   | ID<br>[7.17]         | Congenital<br>[1.07] | Dermatitis<br>[0.47] | Urticaria<br>[0.92]  | Diarrhea<br>[0.49]   | Skin Viral<br>[0.84] |
| Andhra Pradesh               | Iron<br>[2.01]     | Neonatal<br>[1.54]   | PEM<br>[41.43]       | Vit A<br>[1.31]                  | Congenital<br>[1.02] | ID<br>[5.93]         | Dermatitis<br>[0.48] | Urticaria<br>[0.92]  | Skin Viral<br>[0.84] | Hemog<br>[2.38]      |

**eFigure 9c. Leading ten causes of YLDs with the ratio of observed YLDs to YLDs expected on the basis of Socio-Demographic Index alone in 2017, 1-4 years, both sexes combined.**  
The top ten causes contributing to YLDs are listed globally, by socio-demographic quintile, and then by GBD superregion, region, country, and subnationally where modeled. For each cell, the ratio of observed YLDs to YLDs expected on the basis of socio-demographic index (SDI) alone are listed. Abbreviations: YLD=year of life lived with disability, GBD=Global Burden of Disease.

Values shown in brackets represent the ratio of observed YLDs to predicted YLDs on the basis of Socio-Demographic Index (SDI), rounded to two (2) digits. Color ranges (shown below) were calculated to place a roughly equal number of cells into each bin.

| COLOR KEY:           |                    | [0.0-0.72]         | [0.72-0.84]      | [0.84-0.92]          | [0.92-1.01]          | [1.01-1.09]          | [1.09-1.17]          | [1.17-1.32]          | [1.32-1.67]          | 1.67+                |
|----------------------|--------------------|--------------------|------------------|----------------------|----------------------|----------------------|----------------------|----------------------|----------------------|----------------------|
|                      | 1                  | 2                  | 3                | 4                    | 5                    | 6                    | 7                    | 8                    | 9                    | 10                   |
| Arunachal Pradesh    | Neonatal<br>[1.48] | Iron<br>[1.77]     | PEM<br>[56.38]   | Vit A<br>[1.21]      | Congenital<br>[1.04] | ID<br>[5.83]         | Dermatitis<br>[0.48] | Urticaria<br>[0.92]  | Skin Viral<br>[0.84] | Diarrhea<br>[0.42]   |
| Assam                | Neonatal<br>[1.39] | PEM<br>[26.06]     | Vit A<br>[0.74]  | ID<br>[7.6]          | Iron<br>[0.51]       | Congenital<br>[1.11] | Dermatitis<br>[0.49] | Urticaria<br>[0.93]  | Skin Fung<br>[2.42]  | Diarrhea<br>[0.45]   |
| Bihar                | Iron<br>[1.21]     | Neonatal<br>[1.51] | Vit A<br>[0.94]  | PEM<br>[7.21]        | ID<br>[7.79]         | Congenital<br>[1.05] | Dermatitis<br>[0.5]  | Diarrhea<br>[0.45]   | Urticaria<br>[0.94]  | Skin Viral<br>[0.86] |
| Chhattisgarh         | Neonatal<br>[1.47] | PEM<br>[25.8]      | Vit A<br>[0.91]  | Iron<br>[0.81]       | ID<br>[6.55]         | Congenital<br>[1.05] | Dermatitis<br>[0.49] | Urticaria<br>[0.92]  | Skin Viral<br>[0.84] | Skin Fung<br>[1.94]  |
| Delhi                | Iron<br>[13.69]    | Neonatal<br>[1.48] | Vit A<br>[3.77]  | PEM<br>[1231.65]     | Congenital<br>[0.9]  | Dermatitis<br>[0.37] | Urticaria<br>[1.02]  | Diarrhea<br>[0.72]   | Hemog<br>[8.76]      | Oth NTD<br>[2813.93] |
| Goa                  | Neonatal<br>[1.8]  | Iron<br>[7.18]     | PEM<br>[2650.78] | Vit A<br>[2.4]       | Congenital<br>[0.96] | Dermatitis<br>[0.4]  | Urticaria<br>[1.08]  | Diarrhea<br>[0.73]   | Skin Viral<br>[2.79] | URI<br>[0.8]         |
| Gujarat              | Iron<br>[3.13]     | Neonatal<br>[1.48] | PEM<br>[121.78]  | Vit A<br>[1.59]      | Congenital<br>[1.03] | Dermatitis<br>[0.47] | ID<br>[5.79]         | Urticaria<br>[0.91]  | Diarrhea<br>[0.49]   | Skin Viral<br>[0.83] |
| Haryana              | Iron<br>[5.03]     | Neonatal<br>[1.47] | Vit A<br>[2.03]  | PEM<br>[73.48]       | Congenital<br>[1.0]  | Dermatitis<br>[0.46] | Urticaria<br>[0.9]   | ID<br>[5.12]         | Hemog<br>[4.18]      | Oth NTD<br>[7.64]    |
| Himachal Pradesh     | Iron<br>[4.54]     | Neonatal<br>[1.61] | Vit A<br>[2.12]  | PEM<br>[95.49]       | Congenital<br>[0.97] | Dermatitis<br>[0.44] | ID<br>[5.95]         | Urticaria<br>[0.93]  | Diarrhea<br>[0.54]   | Skin Viral<br>[0.8]  |
| Jammu & Kashmir      | Iron<br>[2.98]     | Neonatal<br>[1.44] | Vit A<br>[1.7]   | ID<br>[7.1]          | Congenital<br>[1.05] | Dermatitis<br>[0.47] | Urticaria<br>[0.91]  | PEM<br>[23.52]       | Skin Viral<br>[0.82] | Hemog<br>[3.11]      |
| Jharkhand            | Iron<br>[1.71]     | Neonatal<br>[1.51] | PEM<br>[24.97]   | Vit A<br>[1.12]      | ID<br>[6.54]         | Congenital<br>[1.05] | Dermatitis<br>[0.49] | Urticaria<br>[0.92]  | Diarrhea<br>[0.44]   | Skin Viral<br>[0.84] |
| Karnataka            | Neonatal<br>[1.67] | Iron<br>[2.26]     | PEM<br>[84.13]   | Vit A<br>[1.38]      | Congenital<br>[1.0]  | ID<br>[5.97]         | Dermatitis<br>[0.47] | Urticaria<br>[0.91]  | Diarrhea<br>[0.48]   | Epilepsy<br>[1.06]   |
| Kerala               | Neonatal<br>[1.95] | PEM<br>[425.56]    | Iron<br>[2.36]   | Vit A<br>[1.39]      | Congenital<br>[0.97] | Dermatitis<br>[0.43] | Urticaria<br>[0.96]  | ID<br>[5.71]         | Skin Viral<br>[0.79] | Diarrhea<br>[0.54]   |
| Madhya Pradesh       | Iron<br>[1.82]     | Neonatal<br>[1.37] | PEM<br>[22.21]   | Vit A<br>[1.21]      | ID<br>[7.18]         | Congenital<br>[1.05] | Dermatitis<br>[0.49] | Urticaria<br>[0.92]  | Hemog<br>[2.24]      | Diarrhea<br>[0.42]   |
| Maharashtra          | Neonatal<br>[1.57] | Iron<br>[3.26]     | PEM<br>[246.67]  | Vit A<br>[1.57]      | Congenital<br>[1.0]  | ID<br>[5.94]         | Urticaria<br>[0.92]  | Dermatitis<br>[0.38] | Diarrhea<br>[0.65]   | Skin Viral<br>[0.81] |
| Manipur              | Neonatal<br>[1.61] | ID<br>[7.8]        | Vit A<br>[0.68]  | Congenital<br>[1.06] | Dermatitis<br>[0.47] | Urticaria<br>[0.92]  | Iron<br>[0.51]       | Diarrhea<br>[0.61]   | Skin Viral<br>[0.83] | PEM<br>[20.84]       |
| Meghalaya            | Neonatal<br>[1.56] | Iron<br>[1.25]     | Vit A<br>[1.07]  | PEM<br>[35.27]       | ID<br>[7.04]         | Congenital<br>[1.06] | Dermatitis<br>[0.48] | Urticaria<br>[0.92]  | Diarrhea<br>[0.49]   | Skin Viral<br>[0.84] |
| Mizoram              | Neonatal<br>[1.61] | PEM<br>[118.47]    | Vit A<br>[0.84]  | Congenital<br>[1.03] | ID<br>[6.99]         | Dermatitis<br>[0.46] | Urticaria<br>[0.93]  | Diarrhea<br>[0.65]   | Skin Viral<br>[0.81] | URI<br>[0.91]        |
| Nagaland             | Neonatal<br>[1.7]  | Vit A<br>[1.23]    | PEM<br>[151.12]  | Congenital<br>[1.01] | Dermatitis<br>[0.44] | ID<br>[6.13]         | Urticaria<br>[0.94]  | Iron<br>[0.74]       | Iodine<br>[76.98]    | Skin Viral<br>[0.8]  |
| Odisha               | Neonatal<br>[1.38] | PEM<br>[33.93]     | Vit A<br>[0.93]  | Iron<br>[0.92]       | ID<br>[7.15]         | Congenital<br>[1.07] | Dermatitis<br>[0.49] | Urticaria<br>[0.92]  | Diarrhea<br>[0.53]   | Skin Fung<br>[2.11]  |
| Punjab               | Iron<br>[3.6]      | Neonatal<br>[1.51] | Vit A<br>[1.78]  | PEM<br>[85.86]       | Congenital<br>[1.01] | Dermatitis<br>[0.44] | ID<br>[5.82]         | Urticaria<br>[0.92]  | Skin Viral<br>[0.81] | Diarrhea<br>[0.47]   |
| Rajasthan            | Iron<br>[1.62]     | Neonatal<br>[1.34] | PEM<br>[23.8]    | Vit A<br>[1.13]      | ID<br>[6.75]         | Congenital<br>[1.04] | Dermatitis<br>[0.49] | Urticaria<br>[0.92]  | Diarrhea<br>[0.41]   | Skin Viral<br>[0.84] |
| Sikkim               | Neonatal<br>[1.63] | Iron<br>[2.75]     | Vit A<br>[1.57]  | Congenital<br>[0.98] | Dermatitis<br>[0.45] | Urticaria<br>[0.93]  | ID<br>[5.19]         | Diarrhea<br>[0.6]    | Skin Viral<br>[0.8]  | URI<br>[0.88]        |
| Tamil Nadu           | Neonatal<br>[1.51] | PEM<br>[207.66]    | Iron<br>[2.4]    | Vit A<br>[1.55]      | Dermatitis<br>[0.45] | ID<br>[6.13]         | Congenital<br>[0.83] | Urticaria<br>[0.92]  | Skin Viral<br>[0.81] | Diarrhea<br>[0.45]   |
| Telangana            | Iron<br>[2.96]     | Neonatal<br>[1.55] | PEM<br>[103.93]  | Vit A<br>[1.61]      | Congenital<br>[1.02] | ID<br>[5.96]         | Dermatitis<br>[0.47] | Urticaria<br>[0.91]  | Skin Viral<br>[0.83] | Hemog<br>[2.99]      |
| Tripura              | Neonatal<br>[1.51] | PEM<br>[41.7]      | Iron<br>[1.03]   | Vit A<br>[0.97]      | ID<br>[7.04]         | Congenital<br>[1.04] | Dermatitis<br>[0.48] | Urticaria<br>[0.92]  | Diarrhea<br>[0.49]   | Skin Viral<br>[0.84] |
| Uttar Pradesh        | Iron<br>[1.88]     | Neonatal<br>[1.32] | Vit A<br>[1.2]   | PEM<br>[11.87]       | ID<br>[7.29]         | Congenital<br>[1.14] | Dermatitis<br>[0.47] | Urticaria<br>[0.92]  | Diarrhea<br>[0.47]   | Hemog<br>[2.3]       |
| Uttarakhand          | Iron<br>[4.04]     | Neonatal<br>[1.6]  | Vit A<br>[1.82]  | PEM<br>[63.93]       | Congenital<br>[1.02] | Dermatitis<br>[0.46] | ID<br>[5.65]         | Urticaria<br>[0.89]  | Diarrhea<br>[0.57]   | Skin Viral<br>[0.81] |
| W Bengal             | Neonatal<br>[1.4]  | Iron<br>[1.43]     | Vit A<br>[1.14]  | PEM<br>[27.01]       | ID<br>[7.67]         | Congenital<br>[1.06] | Dermatitis<br>[0.48] | Urticaria<br>[0.92]  | Skin Viral<br>[0.92] | URI<br>[0.95]        |
| UTs other than Delhi | Iron<br>[5.65]     | Neonatal<br>[1.72] | Vit A<br>[2.3]   | PEM<br>[293.26]      | Congenital<br>[0.97] | Dermatitis<br>[0.43] | Urticaria<br>[0.94]  | ID<br>[5.19]         | Skin Viral<br>[0.79] | Diarrhea<br>[0.49]   |
| Nepal                | Neonatal<br>[1.62] | Iron<br>[0.67]     | Vit A<br>[0.48]  | Dermatitis<br>[0.76] | Congenital<br>[0.8]  | Diarrhea<br>[0.48]   | Urticaria<br>[0.97]  | Epilepsy<br>[1.03]   | Skin Viral<br>[0.85] | PEM<br>[1.71]        |

**eFigure 9c. Leading ten causes of YLDs with the ratio of observed YLDs to YLDs expected on the basis of Socio-Demographic Index alone in 2017, 1-4 years, both sexes combined.** The top ten causes contributing to YLDs are listed globally, by socio-demographic quintile, and then by GBD superregion, region, country, and subnationally where modeled. For each cell, the ratio of observed YLDs to YLDs expected on the basis of socio-demographic index (SDI) alone are listed. Abbreviations: YLD=year of life lived with disability, GBD=Global Burden of Disease.

Values shown in brackets represent the ratio of observed YLDs to predicted YLDs on the basis of Socio-Demographic Index (SDI), rounded to two (2) digits. Color ranges (shown below) were calculated to place a roughly equal number of cells into each bin.

| COLOR KEY:                             |                      | [0.0-0.72]           | [0.72-0.84]          | [0.84-0.92]          | [0.92-1.01]          | [1.01-1.09]          | [1.09-1.17]          | [1.17-1.32]          | [1.32-1.67]          | 1.67+                |
|----------------------------------------|----------------------|----------------------|----------------------|----------------------|----------------------|----------------------|----------------------|----------------------|----------------------|----------------------|
|                                        | 1                    | 2                    | 3                    | 4                    | 5                    | 6                    | 7                    | 8                    | 9                    | 10                   |
| Pakistan                               | Iron<br>[1.95]       | Neonatal<br>[1.38]   | Vit A<br>[0.86]      | Diarrhea<br>[1.06]   | PEM<br>[9.85]        | Dermatitis<br>[0.77] | Urticaria<br>[0.92]  | Congenital<br>[0.7]  | Epilepsy<br>[1.0]    | Hemog<br>[2.11]      |
| Southeast Asia, East Asia, and Oceania | Neonatal<br>[1.08]   | Dermatitis<br>[0.67] | Asthma<br>[0.98]     | Diarrhea<br>[1.24]   | Congenital<br>[0.87] | Skin Viral<br>[0.98] | Vit A<br>[0.74]      | Urticaria<br>[0.89]  | URI<br>[0.88]        | Scabies<br>[3.27]    |
| East Asia                              | Neonatal<br>[1.35]   | Dermatitis<br>[0.55] | Diarrhea<br>[1.09]   | Asthma<br>[0.78]     | Skin Viral<br>[1.02] | Congenital<br>[0.71] | Urticaria<br>[0.91]  | Vit A<br>[0.64]      | URI<br>[0.8]         | Hernia<br>[2.34]     |
| China                                  | Neonatal<br>[1.36]   | Dermatitis<br>[0.55] | Asthma<br>[0.75]     | Diarrhea<br>[1.04]   | Skin Viral<br>[0.71] | Congenital<br>[0.71] | Urticaria<br>[0.9]   | Vit A<br>[0.61]      | URI<br>[0.81]        | Hernia<br>[2.36]     |
| N Korea                                | Diarrhea<br>[2.02]   | Neonatal<br>[0.67]   | Vit A<br>[0.64]      | Dermatitis<br>[0.72] | Iron<br>[0.56]       | Asthma<br>[0.77]     | Congenital<br>[0.75] | Skin Viral<br>[1.05] | Urticaria<br>[0.79]  | Scabies<br>[1.59]    |
| Taiwan                                 | Asthma<br>[2.63]     | Diarrhea<br>[2.74]   | Dermatitis<br>[0.62] | Neonatal<br>[0.63]   | Congenital<br>[0.86] | Skin Viral<br>[1.04] | Urticaria<br>[1.24]  | URI<br>[0.73]        | Scabies<br>[11.75]   | Epilepsy<br>[1.05]   |
| Oceania                                | Iron<br>[1.23]       | Asthma<br>[2.16]     | Diarrhea<br>[1.41]   | Dermatitis<br>[1.08] | Neonatal<br>[0.72]   | Vit A<br>[0.52]      | PEM<br>[7.25]        | Congenital<br>[0.92] | Skin Viral<br>[1.01] | Urticaria<br>[0.83]  |
| Am Samoa                               | Asthma<br>[2.57]     | Diarrhea<br>[2.25]   | Dermatitis<br>[0.91] | Neonatal<br>[0.68]   | Vit A<br>[1.63]      | Congenital<br>[0.8]  | Skin Viral<br>[0.94] | Urticaria<br>[0.9]   | URI<br>[0.8]         | Scabies<br>[2.72]    |
| Micronesia                             | Asthma<br>[2.02]     | Diarrhea<br>[1.63]   | Dermatitis<br>[1.05] | Vit A<br>[1.04]      | Neonatal<br>[0.67]   | Iron<br>[0.56]       | Congenital<br>[0.91] | Skin Viral<br>[0.99] | Urticaria<br>[0.82]  | Scabies<br>[1.92]    |
| Fiji                                   | Asthma<br>[2.04]     | Iron<br>[2.37]       | Diarrhea<br>[1.99]   | Dermatitis<br>[0.97] | Neonatal<br>[0.66]   | Vit A<br>[1.0]       | Congenital<br>[0.82] | Skin Viral<br>[0.95] | Urticaria<br>[0.84]  | Scabies<br>[2.77]    |
| Guam                                   | Diarrhea<br>[5.05]   | Asthma<br>[2.73]     | Dermatitis<br>[0.85] | Neonatal<br>[0.78]   | Vit A<br>[2.28]      | Congenital<br>[0.79] | Skin Viral<br>[0.96] | Urticaria<br>[1.07]  | Scabies<br>[7.23]    | URI<br>[0.76]        |
| Kiribati                               | Asthma<br>[2.09]     | Vit A<br>[0.67]      | Diarrhea<br>[1.28]   | Dermatitis<br>[1.11] | Neonatal<br>[0.72]   | PEM<br>[3.26]        | Iron<br>[0.28]       | Congenital<br>[0.91] | Skin Viral<br>[1.02] | Urticaria<br>[0.84]  |
| Marshall                               | Iron<br>[1.54]       | Asthma<br>[1.87]     | Vit A<br>[1.21]      | Dermatitis<br>[1.07] | Neonatal<br>[0.68]   | Diarrhea<br>[1.36]   | Congenital<br>[0.91] | Skin Viral<br>[1.0]  | Urticaria<br>[0.82]  | Scabies<br>[1.85]    |
| N Mariana                              | Asthma<br>[2.76]     | Diarrhea<br>[3.53]   | Neonatal<br>[0.82]   | Dermatitis<br>[0.87] | Congenital<br>[0.81] | Skin Viral<br>[0.95] | Urticaria<br>[1.0]   | Scabies<br>[5.53]    | URI<br>[0.78]        | Vit A<br>[0.84]      |
| PNG                                    | Iron<br>[1.12]       | Asthma<br>[2.25]     | Diarrhea<br>[1.27]   | Dermatitis<br>[1.1]  | Neonatal<br>[0.76]   | PEM<br>[4.85]        | Vit A<br>[0.41]      | Congenital<br>[0.91] | Skin Viral<br>[1.02] | Urticaria<br>[0.84]  |
| Samoa                                  | Asthma<br>[1.94]     | Diarrhea<br>[1.8]    | Vit A<br>[1.11]      | Dermatitis<br>[1.05] | Neonatal<br>[0.68]   | Iron<br>[0.92]       | Congenital<br>[0.87] | Skin Viral<br>[0.99] | Urticaria<br>[0.82]  | Scabies<br>[1.91]    |
| Solomon                                | Iron<br>[0.87]       | Asthma<br>[1.99]     | Vit A<br>[0.65]      | Diarrhea<br>[1.19]   | Dermatitis<br>[1.1]  | Neonatal<br>[0.76]   | Congenital<br>[0.9]  | Skin Viral<br>[1.02] | Urticaria<br>[0.84]  | Scabies<br>[1.98]    |
| Tonga                                  | Asthma<br>[2.66]     | Diarrhea<br>[1.77]   | Dermatitis<br>[0.99] | Neonatal<br>[0.67]   | Vit A<br>[1.06]      | Congenital<br>[0.86] | Skin Viral<br>[0.96] | Urticaria<br>[0.83]  | Scabies<br>[2.44]    | URI<br>[0.87]        |
| Vanuatu                                | Asthma<br>[2.17]     | Iron<br>[0.86]       | Dermatitis<br>[1.08] | Diarrhea<br>[1.22]   | Vit A<br>[0.67]      | Neonatal<br>[0.72]   | Congenital<br>[0.88] | Skin Viral<br>[1.01] | Urticaria<br>[0.83]  | Scabies<br>[1.72]    |
| Southeast Asia                         | Neonatal<br>[0.73]   | Asthma<br>[1.21]     | Dermatitis<br>[0.84] | Diarrhea<br>[1.36]   | Congenital<br>[1.09] | PEM<br>[110.33]      | Vit A<br>[0.76]      | Iron<br>[0.79]       | Urticaria<br>[0.87]  | Skin Viral<br>[0.94] |
| Cambodia                               | Iron<br>[1.26]       | Neonatal<br>[0.74]   | Dermatitis<br>[1.05] | Vit A<br>[0.61]      | Diarrhea<br>[1.03]   | Asthma<br>[1.03]     | Congenital<br>[1.12] | Urticaria<br>[0.85]  | Skin Viral<br>[1.0]  | Epilepsy<br>[1.04]   |
| Indonesia                              | Neonatal<br>[0.74]   | Diarrhea<br>[1.76]   | PEM<br>[255.61]      | Asthma<br>[1.14]     | Dermatitis<br>[0.64] | Congenital<br>[0.99] | Vit A<br>[0.66]      | Urticaria<br>[0.91]  | Skin Viral<br>[0.93] | URI<br>[1.14]        |
| Laos                                   | Dermatitis<br>[1.04] | Asthma<br>[1.15]     | Neonatal<br>[0.61]   | Vit A<br>[0.62]      | Diarrhea<br>[1.02]   | Congenital<br>[1.17] | Iron<br>[0.38]       | Urticaria<br>[0.85]  | Skin Viral<br>[1.0]  | Scabies<br>[1.86]    |
| Malaysia                               | Neonatal<br>[0.84]   | Dermatitis<br>[0.93] | Diarrhea<br>[2.32]   | Asthma<br>[1.16]     | PEM<br>[2010.56]     | Congenital<br>[1.06] | Urticaria<br>[1.02]  | Skin Viral<br>[0.94] | Scabies<br>[5.62]    | Epilepsy<br>[1.26]   |
| Maldives                               | Dermatitis<br>[0.93] | Neonatal<br>[0.66]   | Asthma<br>[1.12]     | Congenital<br>[1.03] | Vit A<br>[0.81]      | Diarrhea<br>[0.81]   | PEM<br>[117.25]      | Urticaria<br>[0.87]  | Skin Viral<br>[0.94] | Scabies<br>[3.21]    |
| Mauritius                              | Neonatal<br>[0.83]   | Dermatitis<br>[0.87] | Iron<br>[4.14]       | Asthma<br>[1.45]     | Diarrhea<br>[1.77]   | PEM<br>[917.63]      | Congenital<br>[1.02] | Urticaria<br>[0.95]  | Skin Viral<br>[0.93] | Vit A<br>[0.86]      |
| Myanmar                                | Neonatal<br>[0.75]   | Dermatitis<br>[1.04] | Vit A<br>[0.82]      | Congenital<br>[1.59] | Diarrhea<br>[1.13]   | Asthma<br>[1.02]     | Iron<br>[0.54]       | Urticaria<br>[0.84]  | Skin Viral<br>[0.99] | Scabies<br>[2.05]    |
| Philippines                            | Asthma<br>[1.69]     | Neonatal<br>[0.79]   | Dermatitis<br>[1.06] | Vit A<br>[0.8]       | Congenital<br>[1.14] | Diarrhea<br>[0.96]   | Iron<br>[0.81]       | URI<br>[1.29]        | Urticaria<br>[0.84]  | Skin Viral<br>[0.96] |
| Sri Lanka                              | Neonatal<br>[0.74]   | Dermatitis<br>[0.9]  | Asthma<br>[1.14]     | Congenital<br>[1.21] | Diarrhea<br>[1.04]   | PEM<br>[247.2]       | Vit A<br>[0.87]      | Skin Viral<br>[0.96] | Epilepsy<br>[1.48]   | Urticaria<br>[0.89]  |
| Seychelles                             | Neonatal<br>[0.8]    | Dermatitis<br>[0.9]  | Asthma<br>[1.17]     | Diarrhea<br>[1.28]   | Congenital<br>[1.02] | Urticaria<br>[0.91]  | Skin Viral<br>[0.93] | Epilepsy<br>[1.2]    | Scabies<br>[3.49]    | URI<br>[0.81]        |
| Thailand                               | Dermatitis<br>[0.98] | Neonatal<br>[0.68]   | Asthma<br>[1.19]     | Congenital<br>[1.09] | Diarrhea<br>[0.87]   | Urticaria<br>[0.9]   | Skin Viral<br>[0.94] | Vit A<br>[0.69]      | Scabies<br>[3.92]    | PEM<br>[179.61]      |

**eFigure 9c. Leading ten causes of YLDs with the ratio of observed YLDs to YLDs expected on the basis of Socio-Demographic Index alone in 2017, 1-4 years, both sexes combined.**  
The top ten causes contributing to YLDs are listed globally, by socio-demographic quintile, and then by GBD superregion, region, country, and subnationally where modeled. For each cell, the ratio of observed YLDs to YLDs expected on the basis of socio-demographic index (SDI) alone are listed. Abbreviations: YLD=year of life lived with disability, GBD=Global Burden of Disease.

Values shown in brackets represent the ratio of observed YLDs to predicted YLDs on the basis of Socio-Demographic Index (SDI), rounded to two (2) digits. Color ranges (shown below) were calculated to place a roughly equal number of cells into each bin.

| COLOR KEY:                 |                            | [0.0-0.72]           | [0.72-0.84]          | [0.84-0.92]          | [0.92-1.01]          | [1.01-1.09]          | [1.09-1.17]          | [1.17-1.32]          | [1.32-1.67]          | 1.67+                |                      |
|----------------------------|----------------------------|----------------------|----------------------|----------------------|----------------------|----------------------|----------------------|----------------------|----------------------|----------------------|----------------------|
|                            | 1                          | 2                    | 3                    | 4                    | 5                    | 6                    | 7                    | 8                    | 9                    | 10                   |                      |
| Timor-Leste                | Iron<br>[1.92]             | Vit A<br>[0.94]      | PEM<br>[17.77]       | Dermatitis<br>[1.04] | Neonatal<br>[0.66]   | Diarrhea<br>[1.13]   | Asthma<br>[1.04]     | Congenital<br>[1.13] | Urticaria<br>[0.84]  | Skin Viral<br>[0.99] |                      |
| Vietnam                    | Dermatitis<br>[0.88]       | Neonatal<br>[0.6]    | Asthma<br>[0.87]     | Diarrhea<br>[1.03]   | Iron<br>[0.82]       | Congenital<br>[1.01] | Vit A<br>[0.58]      | Urticaria<br>[0.84]  | Skin Viral<br>[0.97] | Scabies<br>[2.09]    |                      |
| Sub-Saharan Africa         | Iron<br>[1.27]             | Vit A<br>[0.99]      | Neonatal<br>[1.11]   | Diarrhea<br>[1.06]   | Dermatitis<br>[0.94] | Congenital<br>[1.16] | Asthma<br>[0.71]     | Malaria<br>[13.68]   | PEM<br>[3.5]         | Epilepsy<br>[1.16]   |                      |
| Central Sub-Saharan Africa | Iron<br>[1.04]             | Vit A<br>[1.09]      | Neonatal<br>[1.24]   | Diarrhea<br>[1.45]   | Dermatitis<br>[1.13] | Asthma<br>[0.99]     | Malaria<br>[24.01]   | Congenital<br>[1.08] | Epilepsy<br>[1.55]   | Urticaria<br>[0.86]  |                      |
|                            | Iron<br>[2.04]             | Vit A<br>[1.15]      | Neonatal<br>[1.34]   | Diarrhea<br>[1.41]   | Dermatitis<br>[1.12] | Asthma<br>[1.17]     | Congenital<br>[1.12] | Epilepsy<br>[1.73]   | Malaria<br>[16.56]   | Hemog<br>[2.3]       |                      |
| Angola                     | Iron<br>[1.33]             | Vit A<br>[1.24]      | Diarrhea<br>[1.28]   | Neonatal<br>[1.2]    | Malaria<br>[4.99]    | Dermatitis<br>[1.19] | Asthma<br>[1.17]     | Congenital<br>[1.06] | Epilepsy<br>[1.51]   | Hemog<br>[1.75]      |                      |
| C African Rep              | Neonatal<br>[1.44]         | Vit A<br>[1.68]      | Diarrhea<br>[1.99]   | Iron<br>[1.39]       | Dermatitis<br>[1.09] | Asthma<br>[1.25]     | Epilepsy<br>[1.98]   | Congenital<br>[1.01] | Malaria<br>[185.54]  | PEM<br>[22.0]        |                      |
| Congo                      | Vit A<br>[0.77]            | Neonatal<br>[1.32]   | Diarrhea<br>[1.22]   | Iron<br>[0.48]       | Dermatitis<br>[1.18] | Malaria<br>[5.13]    | Asthma<br>[0.97]     | Congenital<br>[1.04] | Epilepsy<br>[1.36]   | Urticaria<br>[0.9]   |                      |
| Congo DR                   | Neonatal<br>[1.05]         | Iron<br>[2.44]       | Vit A<br>[1.86]      | Dermatitis<br>[1.02] | Diarrhea<br>[1.75]   | Malaria<br>[841.23]  | Asthma<br>[1.15]     | Epilepsy<br>[2.17]   | Congenital<br>[0.94] | URI<br>[1.22]        |                      |
| Eq Guinea                  | Neonatal<br>[1.51]         | Iron<br>[4.2]        | Diarrhea<br>[2.24]   | Vit A<br>[2.0]       | Dermatitis<br>[0.99] | Asthma<br>[1.23]     | Epilepsy<br>[2.31]   | Malaria<br>[1189.82] | Congenital<br>[0.92] | URI<br>[1.26]        |                      |
| Gabon                      | Eastern Sub-Saharan Africa | Iron<br>[0.81]       | Neonatal<br>[1.38]   | Vit A<br>[0.76]      | Dermatitis<br>[1.01] | Diarrhea<br>[0.89]   | Congenital<br>[1.18] | Asthma<br>[0.89]     | Epilepsy<br>[1.06]   | Urticaria<br>[0.9]   | Skin Viral<br>[0.99] |
| Burundi                    |                            | Vit A<br>[0.62]      | Neonatal<br>[1.24]   | Iron<br>[0.45]       | Dermatitis<br>[1.09] | Diarrhea<br>[0.77]   | Congenital<br>[1.13] | Asthma<br>[0.91]     | Malaria<br>[1.58]    | Epilepsy<br>[1.12]   | Urticaria<br>[0.93]  |
| Comoros                    | Neonatal<br>[1.53]         | Vit A<br>[0.72]      | Iron<br>[0.59]       | Dermatitis<br>[1.02] | Diarrhea<br>[1.04]   | Asthma<br>[0.96]     | Congenital<br>[1.04] | PEM<br>[3.59]        | Urticaria<br>[0.87]  | Epilepsy<br>[1.08]   |                      |
| Djibouti                   | Neonatal<br>[1.42]         | PEM<br>[24.12]       | Iron<br>[1.28]       | Dermatitis<br>[0.99] | Vit A<br>[0.53]      | Asthma<br>[0.8]      | Diarrhea<br>[0.71]   | Congenital<br>[1.04] | Epilepsy<br>[1.19]   | Urticaria<br>[0.85]  |                      |
| Eritrea                    | Iron<br>[1.15]             | Neonatal<br>[1.55]   | Vit A<br>[0.84]      | Dermatitis<br>[1.02] | Diarrhea<br>[0.9]    | Congenital<br>[1.07] | Asthma<br>[0.8]      | PEM<br>[2.84]        | Epilepsy<br>[1.09]   | Urticaria<br>[0.87]  |                      |
| Ethiopia                   | Iron<br>[0.9]              | Vit A<br>[0.8]       | Neonatal<br>[1.45]   | Dermatitis<br>[1.05] | Diarrhea<br>[0.73]   | Congenital<br>[1.08] | Asthma<br>[0.78]     | PEM<br>[1.03]        | Urticaria<br>[0.95]  | Skin Viral<br>[1.12] |                      |
| Kenya                      | Neonatal<br>[1.55]         | Vit A<br>[0.97]      | Dermatitis<br>[1.05] | Diarrhea<br>[1.1]    | Congenital<br>[1.52] | Iron<br>[0.52]       | Asthma<br>[0.61]     | Urticaria<br>[0.89]  | Skin Viral<br>[0.92] | Epilepsy<br>[0.99]   |                      |
| Baringo                    | Neonatal<br>[1.56]         | Vit A<br>[1.07]      | Dermatitis<br>[1.04] | Diarrhea<br>[1.08]   | Iron<br>[0.46]       | Congenital<br>[1.49] | Asthma<br>[0.61]     | Urticaria<br>[0.9]   | Skin Viral<br>[0.93] | URI<br>[1.08]        |                      |
| Bomet                      | Neonatal<br>[1.7]          | Vit A<br>[0.79]      | Dermatitis<br>[1.03] | Congenital<br>[1.47] | Diarrhea<br>[0.84]   | Iron<br>[0.45]       | Asthma<br>[0.63]     | Urticaria<br>[0.89]  | Skin Viral<br>[0.93] | URI<br>[1.07]        |                      |
| Bungoma                    | Neonatal<br>[1.58]         | Vit A<br>[1.01]      | Iron<br>[0.72]       | Dermatitis<br>[1.03] | Diarrhea<br>[1.06]   | Congenital<br>[1.49] | PEM<br>[4.61]        | Asthma<br>[0.61]     | Urticaria<br>[0.89]  | Skin Viral<br>[0.93] |                      |
| Busia                      | Neonatal<br>[1.59]         | Vit A<br>[0.57]      | Dermatitis<br>[1.05] | Diarrhea<br>[1.02]   | Congenital<br>[1.5]  | Malaria<br>[12.08]   | Asthma<br>[0.6]      | Iron<br>[0.24]       | Urticaria<br>[0.91]  | Skin Viral<br>[0.94] |                      |
| Elgeyo-Marakwet            | Neonatal<br>[1.67]         | Dermatitis<br>[1.03] | Vit A<br>[0.63]      | Congenital<br>[1.5]  | Diarrhea<br>[0.98]   | Asthma<br>[0.62]     | Iron<br>[0.33]       | Urticaria<br>[0.89]  | Skin Viral<br>[0.93] | Epilepsy<br>[0.97]   |                      |
| Embu                       | Neonatal<br>[1.66]         | Dermatitis<br>[1.02] | Vit A<br>[0.8]       | Diarrhea<br>[1.22]   | Iron<br>[0.71]       | Congenital<br>[1.5]  | Asthma<br>[0.61]     | Urticaria<br>[0.89]  | Skin Viral<br>[0.92] | Epilepsy<br>[1.05]   |                      |
| Garissa                    | Neonatal<br>[1.85]         | Vit A<br>[0.57]      | Dermatitis<br>[1.11] | Congenital<br>[1.49] | Iron<br>[0.33]       | Diarrhea<br>[0.57]   | Asthma<br>[0.68]     | Urticaria<br>[0.96]  | Skin Viral<br>[0.98] | Epilepsy<br>[0.84]   |                      |
| HomaBay                    | Neonatal<br>[1.2]          | Vit A<br>[0.78]      | Iron<br>[0.6]        | Diarrhea<br>[1.2]    | Dermatitis<br>[1.05] | Congenital<br>[1.54] | HIV<br>[53.56]       | Asthma<br>[0.65]     | PEM<br>[2.5]         | Urticaria<br>[0.91]  |                      |
| Isiolo                     | Iron<br>[1.08]             | Vit A<br>[0.92]      | Neonatal<br>[1.49]   | Dermatitis<br>[1.07] | Diarrhea<br>[0.93]   | PEM<br>[3.42]        | Congenital<br>[1.49] | Asthma<br>[0.62]     | Urticaria<br>[0.92]  | Skin Viral<br>[0.95] |                      |
| Kajiado                    | Neonatal<br>[1.73]         | Iron<br>[2.07]       | Vit A<br>[1.93]      | Dermatitis<br>[1.02] | Congenital<br>[1.5]  | Diarrhea<br>[0.93]   | Asthma<br>[0.61]     | Hemog<br>[3.18]      | Urticaria<br>[0.88]  | Skin Viral<br>[0.92] |                      |
| Kakamega                   | Neonatal<br>[1.46]         | Vit A<br>[0.86]      | Iron<br>[0.79]       | Diarrhea<br>[1.19]   | Dermatitis<br>[1.04] | Congenital<br>[1.5]  | Asthma<br>[0.63]     | Urticaria<br>[0.9]   | Skin Viral<br>[0.93] | Epilepsy<br>[0.91]   |                      |
| Kericho                    | Neonatal<br>[1.79]         | Dermatitis<br>[1.03] | Diarrhea<br>[1.22]   | Vit A<br>[0.59]      | Congenital<br>[1.49] | Asthma<br>[0.63]     | Urticaria<br>[0.89]  | Skin Viral<br>[0.93] | URI<br>[1.07]        | Epilepsy<br>[0.93]   |                      |
| Kiambu                     | Neonatal<br>[1.72]         | Dermatitis<br>[1.0]  | Congenital<br>[1.52] | Diarrhea<br>[1.18]   | Asthma<br>[0.62]     | Vit A<br>[0.5]       | Urticaria<br>[0.88]  | Skin Viral<br>[0.91] | Epilepsy<br>[1.15]   | URI<br>[1.06]        |                      |
| Kilifi                     | Neonatal<br>[1.52]         | Vit A<br>[0.92]      | Dermatitis<br>[1.04] | Diarrhea<br>[1.05]   | Congenital<br>[1.49] | Iron<br>[0.31]       | Asthma<br>[0.57]     | Urticaria<br>[0.9]   | Skin Viral<br>[0.93] | URI<br>[1.08]        |                      |

**eFigure 9c. Leading ten causes of YLDs with the ratio of observed YLDs to YLDs expected on the basis of Socio-Demographic Index alone in 2017, 1-4 years, both sexes combined.**  
The top ten causes contributing to YLDs are listed globally, by socio-demographic quintile, and then by GBD superregion, region, country, and subnationally where modeled. For each cell, the ratio of observed YLDs to YLDs expected on the basis of socio-demographic index (SDI) alone are listed. Abbreviations: YLD=year of life lived with disability, GBD=Global Burden of Disease.

Values shown in brackets represent the ratio of observed YLDs to predicted YLDs on the basis of Socio-Demographic Index (SDI), rounded to two (2) digits. Color ranges (shown below) were calculated to place a roughly equal number of cells into each bin.

| COLOR KEY:   |                    | [0.0-0.72]           | [0.72-0.84]          | [0.84-0.92]          | [0.92-1.01]          | [1.01-1.09]          | [1.09-1.17]         | [1.17-1.32]          | [1.32-1.67]          | 1.67+                |
|--------------|--------------------|----------------------|----------------------|----------------------|----------------------|----------------------|---------------------|----------------------|----------------------|----------------------|
|              | 1                  | 2                    | 3                    | 4                    | 5                    | 6                    | 7                   | 8                    | 9                    | 10                   |
| Kirinyaga    | Neonatal<br>[1.7]  | Diarrhea<br>[1.46]   | Dermatitis<br>[1.02] | Vit A<br>[0.75]      | Congenital<br>[1.52] | Asthma<br>[0.63]     | Urticaria<br>[0.89] | Skin Viral<br>[0.92] | Epilepsy<br>[1.05]   | URI<br>[1.07]        |
| Kisii        | Neonatal<br>[1.45] | Vit A<br>[0.95]      | Dermatitis<br>[1.03] | Diarrhea<br>[1.12]   | Congenital<br>[1.53] | Asthma<br>[0.61]     | Urticaria<br>[0.89] | Skin Viral<br>[0.92] | Epilepsy<br>[0.98]   | URI<br>[1.08]        |
| Kisumu       | Neonatal<br>[1.2]  | Vit A<br>[1.17]      | Iron<br>[0.87]       | Dermatitis<br>[0.89] | Congenital<br>[1.55] | Diarrhea<br>[1.04]   | Asthma<br>[0.62]    | Urticaria<br>[0.88]  | Epilepsy<br>[1.11]   | Hemog<br>[2.42]      |
| Kitui        | Neonatal<br>[1.73] | Vit A<br>[0.78]      | Iron<br>[0.62]       | Dermatitis<br>[1.04] | Diarrhea<br>[1.07]   | Congenital<br>[1.47] | Asthma<br>[0.6]     | Urticaria<br>[0.9]   | Skin Viral<br>[0.93] | URI<br>[1.08]        |
| Kwale        | Neonatal<br>[1.59] | Vit A<br>[0.77]      | Dermatitis<br>[1.04] | Iron<br>[0.5]        | Congenital<br>[1.48] | Diarrhea<br>[0.87]   | Asthma<br>[0.6]     | Urticaria<br>[0.9]   | Skin Viral<br>[0.93] | Epilepsy<br>[0.94]   |
| Laikipia     | Neonatal<br>[1.76] | Dermatitis<br>[1.02] | Diarrhea<br>[1.18]   | Congenital<br>[1.5]  | Asthma<br>[0.66]     | Vit A<br>[0.44]      | Urticaria<br>[0.89] | Skin Viral<br>[0.92] | Epilepsy<br>[1.04]   | URI<br>[1.08]        |
| Lamu         | Neonatal<br>[1.46] | Iron<br>[0.75]       | Vit A<br>[0.61]      | Dermatitis<br>[1.04] | Diarrhea<br>[1.08]   | Congenital<br>[1.49] | Asthma<br>[0.62]    | Urticaria<br>[0.9]   | Epilepsy<br>[1.02]   | Skin Viral<br>[0.93] |
| Machakos     | Neonatal<br>[1.67] | Dermatitis<br>[1.02] | Diarrhea<br>[1.31]   | Vit A<br>[0.79]      | Congenital<br>[1.49] | Iron<br>[0.53]       | Asthma<br>[0.6]     | Urticaria<br>[0.89]  | Skin Viral<br>[0.92] | Epilepsy<br>[1.01]   |
| Makueni      | Neonatal<br>[1.65] | Dermatitis<br>[1.04] | Congenital<br>[1.49] | Vit A<br>[0.44]      | Diarrhea<br>[0.74]   | Asthma<br>[0.62]     | Urticaria<br>[0.9]  | Skin Viral<br>[0.93] | HIV<br>[48.42]       | Epilepsy<br>[0.93]   |
| Mandera      | Vit A<br>[0.91]    | Neonatal<br>[1.68]   | Iron<br>[0.48]       | Dermatitis<br>[1.12] | Diarrhea<br>[0.69]   | Congenital<br>[1.47] | PEM<br>[1.06]       | Asthma<br>[0.64]     | Urticaria<br>[0.97]  | Skin Viral<br>[0.99] |
| Marsabit     | Neonatal<br>[1.89] | PEM<br>[4.22]        | Vit A<br>[0.58]      | Dermatitis<br>[1.11] | Diarrhea<br>[0.78]   | Congenital<br>[1.48] | Iron<br>[0.19]      | Asthma<br>[0.62]     | Urticaria<br>[0.95]  | Skin Viral<br>[0.98] |
| Meru         | Neonatal<br>[1.7]  | Vit A<br>[1.17]      | Diarrhea<br>[1.43]   | Dermatitis<br>[1.02] | Congenital<br>[1.5]  | Asthma<br>[0.63]     | Iron<br>[0.34]      | Urticaria<br>[0.89]  | Skin Viral<br>[0.92] | Epilepsy<br>[0.99]   |
| Migori       | Vit A<br>[0.84]    | Neonatal<br>[1.14]   | Diarrhea<br>[1.12]   | Dermatitis<br>[1.05] | Congenital<br>[1.53] | Iron<br>[0.28]       | Asthma<br>[0.66]    | Urticaria<br>[0.91]  | HIV<br>[41.45]       | PEM<br>[2.02]        |
| Mombasa      | Neonatal<br>[1.5]  | Vit A<br>[1.23]      | Dermatitis<br>[1.01] | Diarrhea<br>[1.34]   | Congenital<br>[1.52] | Iron<br>[0.53]       | Asthma<br>[0.59]    | Urticaria<br>[0.88]  | Epilepsy<br>[1.16]   | Skin Viral<br>[0.91] |
| Murang'a     | Neonatal<br>[1.71] | Dermatitis<br>[1.03] | Congenital<br>[1.51] | Diarrhea<br>[1.06]   | Vit A<br>[0.56]      | Asthma<br>[0.62]     | Urticaria<br>[0.89] | Skin Viral<br>[0.92] | URI<br>[1.16]        | Epilepsy<br>[1.01]   |
| Nairobi      | Neonatal<br>[1.66] | Dermatitis<br>[1.15] | Congenital<br>[1.43] | Vit A<br>[1.17]      | Diarrhea<br>[1.13]   | Asthma<br>[0.67]     | Urticaria<br>[0.93] | Epilepsy<br>[1.42]   | Skin Viral<br>[0.86] | URI<br>[0.96]        |
| Nakuru       | Neonatal<br>[1.83] | Dermatitis<br>[1.02] | Diarrhea<br>[1.31]   | Congenital<br>[1.53] | Vit A<br>[0.69]      | Asthma<br>[0.65]     | Epilepsy<br>[1.61]  | Urticaria<br>[0.89]  | Skin Viral<br>[0.92] | Iron<br>[0.3]        |
| Nandi        | Neonatal<br>[1.72] | Dermatitis<br>[1.03] | Congenital<br>[1.5]  | Diarrhea<br>[0.96]   | Vit A<br>[0.48]      | Asthma<br>[0.63]     | Urticaria<br>[0.89] | Skin Viral<br>[0.93] | Epilepsy<br>[0.96]   | URI<br>[1.08]        |
| Narok        | Neonatal<br>[1.89] | Vit A<br>[1.05]      | Iron<br>[0.49]       | Dermatitis<br>[1.06] | Congenital<br>[1.46] | Diarrhea<br>[0.75]   | Asthma<br>[0.67]    | Urticaria<br>[0.92]  | Skin Viral<br>[0.95] | Epilepsy<br>[0.89]   |
| Nyamira      | Neonatal<br>[1.6]  | Dermatitis<br>[1.03] | Diarrhea<br>[1.16]   | Congenital<br>[1.54] | Asthma<br>[0.62]     | Urticaria<br>[0.89]  | Epilepsy<br>[1.14]  | Skin Viral<br>[0.93] | URI<br>[1.08]        | Vit A<br>[0.27]      |
| Nyandarua    | Neonatal<br>[1.79] | Dermatitis<br>[1.02] | Diarrhea<br>[1.15]   | Congenital<br>[1.53] | Vit A<br>[0.47]      | Asthma<br>[0.64]     | PEM<br>[10.7]       | Urticaria<br>[0.89]  | Epilepsy<br>[1.16]   | Skin Viral<br>[0.92] |
| Nyeri        | Neonatal<br>[1.71] | Dermatitis<br>[1.02] | Congenital<br>[1.53] | Diarrhea<br>[1.13]   | Vit A<br>[0.47]      | Asthma<br>[0.62]     | Urticaria<br>[0.89] | Epilepsy<br>[1.19]   | Skin Viral<br>[0.92] | URI<br>[1.07]        |
| Samburu      | Neonatal<br>[1.98] | Vit A<br>[0.83]      | Iron<br>[0.51]       | Dermatitis<br>[1.12] | Diarrhea<br>[0.79]   | Congenital<br>[1.48] | PEM<br>[0.83]       | Asthma<br>[0.68]     | Urticaria<br>[0.96]  | Skin Viral<br>[0.99] |
| Siaya        | Vit A<br>[1.13]    | Neonatal<br>[1.26]   | Iron<br>[0.75]       | Diarrhea<br>[1.16]   | Dermatitis<br>[1.03] | Congenital<br>[1.51] | Malaria<br>[23.46]  | Asthma<br>[0.66]     | Urticaria<br>[0.9]   | Skin Viral<br>[0.93] |
| TaitaTaveta  | Neonatal<br>[1.59] | Dermatitis<br>[1.03] | Diarrhea<br>[1.2]    | Congenital<br>[1.52] | Vit A<br>[0.53]      | Asthma<br>[0.61]     | Urticaria<br>[0.89] | Epilepsy<br>[1.15]   | Skin Viral<br>[0.92] | URI<br>[1.07]        |
| TanaRiver    | Vit A<br>[0.99]    | Neonatal<br>[1.68]   | Iron<br>[0.89]       | Dermatitis<br>[1.07] | Diarrhea<br>[0.95]   | Congenital<br>[1.5]  | PEM<br>[2.0]        | Asthma<br>[0.62]     | Urticaria<br>[0.92]  | Skin Viral<br>[0.96] |
| TharakaNithi | Neonatal<br>[1.47] | Vit A<br>[0.86]      | Diarrhea<br>[1.39]   | Dermatitis<br>[1.02] | Congenital<br>[1.53] | Iron<br>[0.51]       | Asthma<br>[0.62]    | Urticaria<br>[0.88]  | Epilepsy<br>[1.12]   | Skin Viral<br>[0.92] |
| TransNzoia   | Neonatal<br>[1.64] | Vit A<br>[0.87]      | Diarrhea<br>[1.31]   | Dermatitis<br>[1.03] | Congenital<br>[1.48] | Iron<br>[0.39]       | Asthma<br>[0.62]    | Urticaria<br>[0.89]  | Skin Viral<br>[0.93] | URI<br>[1.07]        |
| Turkana      | Neonatal<br>[1.83] | PEM<br>[2.5]         | Vit A<br>[0.5]       | Diarrhea<br>[0.91]   | Dermatitis<br>[1.12] | Congenital<br>[1.52] | Asthma<br>[0.64]    | Urticaria<br>[0.97]  | Iron<br>[0.13]       | Skin Viral<br>[1.0]  |
| UasinGishu   | Neonatal<br>[1.62] | Dermatitis<br>[1.44] | Vit A<br>[0.92]      | Diarrhea<br>[1.29]   | Iron<br>[0.8]        | Congenital<br>[1.49] | Asthma<br>[0.62]    | Urticaria<br>[0.89]  | Skin Viral<br>[0.92] | URI<br>[1.07]        |
| Vihiga       | Neonatal<br>[1.6]  | Vit A<br>[1.05]      | Dermatitis<br>[1.03] | Diarrhea<br>[1.0]    | Congenital<br>[1.5]  | Iron<br>[0.41]       | Asthma<br>[0.63]    | Urticaria<br>[0.9]   | Malaria<br>[19.48]   | Skin Viral<br>[0.93] |

**eFigure 9c. Leading ten causes of YLDs with the ratio of observed YLDs to YLDs expected on the basis of Socio-Demographic Index alone in 2017, 1-4 years, both sexes combined.**  
The top ten causes contributing to YLDs are listed globally, by socio-demographic quintile, and then by GBD superregion, region, country, and subnationally where modeled. For each cell, the ratio of observed YLDs to YLDs expected on the basis of socio-demographic index (SDI) alone are listed. Abbreviations: YLD=year of life lived with disability, GBD=Global Burden of Disease.

Values shown in brackets represent the ratio of observed YLDs to predicted YLDs on the basis of Socio-Demographic Index (SDI), rounded to two (2) digits. Color ranges (shown below) were calculated to place a roughly equal number of cells into each bin.

| COLOR KEY:                         |                    | [0.0-0.72]           | [0.72-0.84]          | [0.84-0.92]          | [0.92-1.01]          | [1.01-1.09]          | [1.09-1.17]          | [1.17-1.32]          | [1.32-1.67]          | 1.67+                |
|------------------------------------|--------------------|----------------------|----------------------|----------------------|----------------------|----------------------|----------------------|----------------------|----------------------|----------------------|
|                                    | 1                  | 2                    | 3                    | 4                    | 5                    | 6                    | 7                    | 8                    | 9                    | 10                   |
| Wajir                              | Neonatal<br>[1.94] | Vit A<br>[0.63]      | Dermatitis<br>[1.14] | Iron<br>[0.3]        | Congenital<br>[1.51] | Diarrhea<br>[0.56]   | Asthma<br>[0.66]     | Urticaria<br>[0.98]  | Skin Viral<br>[1.0]  | URI<br>[1.23]        |
| WestPokot                          | Neonatal<br>[1.8]  | Vit A<br>[0.96]      | Iron<br>[0.59]       | Dermatitis<br>[1.08] | Diarrhea<br>[0.96]   | Congenital<br>[1.47] | PEM<br>[1.8]         | Asthma<br>[0.64]     | Urticaria<br>[0.93]  | Skin Viral<br>[0.96] |
| Madagascar                         | Neonatal<br>[1.52] | Congenital<br>[2.43] | Diarrhea<br>[1.21]   | Vit A<br>[0.48]      | Iron<br>[0.42]       | Dermatitis<br>[1.08] | PEM<br>[1.63]        | Asthma<br>[1.08]     | Epilepsy<br>[1.17]   | Urticaria<br>[0.92]  |
| Malawi                             | Iron<br>[0.91]     | Vit A<br>[0.74]      | Neonatal<br>[1.39]   | Diarrhea<br>[1.48]   | Dermatitis<br>[1.07] | Congenital<br>[1.12] | Asthma<br>[0.89]     | Malaria<br>[2.64]    | Epilepsy<br>[1.02]   | Urticaria<br>[0.91]  |
| Mozambique                         | Iron<br>[0.87]     | Vit A<br>[0.8]       | Neonatal<br>[1.29]   | Dermatitis<br>[0.94] | Malaria<br>[3.32]    | Diarrhea<br>[0.6]    | Asthma<br>[0.92]     | Congenital<br>[1.09] | Epilepsy<br>[1.39]   | HIV<br>[29.72]       |
| Rwanda                             | Neonatal<br>[1.36] | Iron<br>[0.56]       | Vit A<br>[0.55]      | Asthma<br>[1.19]     | Diarrhea<br>[0.87]   | Dermatitis<br>[0.77] | Congenital<br>[1.09] | Epilepsy<br>[1.16]   | Urticaria<br>[0.88]  | Skin Viral<br>[0.95] |
| Somalia                            | Iron<br>[0.75]     | Vit A<br>[0.63]      | Neonatal<br>[1.5]    | Dermatitis<br>[1.11] | PEM<br>[0.85]        | Diarrhea<br>[0.61]   | Congenital<br>[1.08] | Asthma<br>[0.86]     | Epilepsy<br>[0.91]   | Urticaria<br>[0.94]  |
| S Sudan                            | Vit A<br>[0.95]    | Iron<br>[0.89]       | PEM<br>[2.17]        | Neonatal<br>[1.4]    | Diarrhea<br>[1.01]   | Dermatitis<br>[1.09] | Asthma<br>[1.07]     | Malaria<br>[1.26]    | Congenital<br>[1.02] | Epilepsy<br>[0.98]   |
| Tanzania                           | Iron<br>[0.9]      | Neonatal<br>[1.33]   | Vit A<br>[0.69]      | Dermatitis<br>[0.91] | Asthma<br>[1.16]     | Diarrhea<br>[0.71]   | Congenital<br>[0.91] | Epilepsy<br>[1.11]   | Urticaria<br>[0.87]  | Skin Viral<br>[0.91] |
| Uganda                             | Neonatal<br>[1.37] | Iron<br>[0.58]       | Vit A<br>[0.6]       | Dermatitis<br>[1.03] | Diarrhea<br>[0.92]   | Asthma<br>[0.98]     | Malaria<br>[7.12]    | Congenital<br>[0.94] | Epilepsy<br>[1.35]   | Urticaria<br>[0.89]  |
| Zambia                             | Iron<br>[1.35]     | Neonatal<br>[1.24]   | Vit A<br>[1.11]      | Diarrhea<br>[1.25]   | Dermatitis<br>[1.0]  | Congenital<br>[1.08] | Asthma<br>[0.73]     | Epilepsy<br>[1.39]   | Malaria<br>[21.49]   | Urticaria<br>[0.86]  |
| <b>Southern Sub-Saharan Africa</b> | Neonatal<br>[1.17] | Dermatitis<br>[1.19] | Vit A<br>[1.06]      | Congenital<br>[1.17] | Iron<br>[1.14]       | Diarrhea<br>[0.85]   | Urticaria<br>[0.89]  | Skin Viral<br>[0.83] | URI<br>[0.9]         | Epilepsy<br>[1.0]    |
| Botswana                           | Neonatal<br>[1.31] | Dermatitis<br>[1.17] | Vit A<br>[1.31]      | Iron<br>[1.78]       | Diarrhea<br>[1.07]   | Congenital<br>[0.82] | Urticaria<br>[0.89]  | Skin Viral<br>[0.83] | Asthma<br>[0.41]     | Epilepsy<br>[1.06]   |
| Lesotho                            | Iron<br>[1.15]     | Neonatal<br>[1.07]   | Vit A<br>[0.95]      | Dermatitis<br>[1.33] | Diarrhea<br>[0.96]   | Congenital<br>[0.91] | HIV<br>[81.41]       | Urticaria<br>[0.85]  | Skin Viral<br>[0.88] | Skin Fung<br>[1.79]  |
| Namibia                            | Neonatal<br>[1.19] | Iron<br>[2.52]       | Dermatitis<br>[1.24] | Diarrhea<br>[1.63]   | Vit A<br>[1.05]      | Congenital<br>[0.85] | PEM<br>[49.17]       | Urticaria<br>[0.85]  | Skin Viral<br>[0.85] | URI<br>[1.0]         |
| S Africa                           | Neonatal<br>[1.22] | Dermatitis<br>[1.14] | Congenital<br>[1.37] | Vit A<br>[1.08]      | Urticaria<br>[0.94]  | Skin Viral<br>[0.82] | URI<br>[0.89]        | Epilepsy<br>[1.09]   | Iron<br>[0.71]       | ASD<br>[0.87]        |
| Swaziland                          | Neonatal<br>[1.02] | Dermatitis<br>[1.3]  | Diarrhea<br>[1.49]   | Iron<br>[1.08]       | Vit A<br>[0.77]      | Congenital<br>[0.88] | Urticaria<br>[0.85]  | HIV<br>[122.68]      | Asthma<br>[0.43]     | Skin Viral<br>[0.87] |
| Zimbabwe                           | Neonatal<br>[1.15] | Dermatitis<br>[1.34] | Diarrhea<br>[1.44]   | Iron<br>[0.67]       | Vit A<br>[0.6]       | Congenital<br>[0.78] | Urticaria<br>[0.87]  | Skin Viral<br>[0.89] | Skin Fung<br>[1.66]  | URI<br>[0.94]        |
| <b>Western Sub-Saharan Africa</b>  | Iron<br>[1.67]     | Vit A<br>[1.07]      | Neonatal<br>[0.89]   | Diarrhea<br>[1.06]   | Dermatitis<br>[0.82] | PEM<br>[5.0]         | Congenital<br>[1.16] | Malaria<br>[16.69]   | Hemog<br>[2.33]      | Asthma<br>[0.56]     |
| Benin                              | Iron<br>[0.82]     | Vit A<br>[0.82]      | Neonatal<br>[1.23]   | Malaria<br>[7.19]    | Dermatitis<br>[0.88] | PEM<br>[2.14]        | Diarrhea<br>[0.55]   | Congenital<br>[0.98] | Epilepsy<br>[1.22]   | Asthma<br>[0.6]      |
| Burkina Faso                       | Iron<br>[1.82]     | Vit A<br>[1.02]      | Malaria<br>[2.66]    | Neonatal<br>[1.05]   | Diarrhea<br>[0.81]   | Dermatitis<br>[0.91] | PEM<br>[1.05]        | Hemog<br>[1.92]      | Congenital<br>[0.99] | Asthma<br>[0.76]     |
| Cameroon                           | Iron<br>[1.04]     | Vit A<br>[1.03]      | Diarrhea<br>[1.69]   | Neonatal<br>[0.91]   | Dermatitis<br>[0.87] | Malaria<br>[37.55]   | Congenital<br>[1.03] | Epilepsy<br>[1.4]    | Asthma<br>[0.54]     | Urticaria<br>[0.86]  |
| Cape Verde                         | Neonatal<br>[1.5]  | Iron<br>[1.44]       | Dermatitis<br>[0.83] | Diarrhea<br>[0.76]   | Congenital<br>[0.93] | Asthma<br>[0.58]     | Epilepsy<br>[1.32]   | Urticaria<br>[0.85]  | Skin Viral<br>[0.88] | URI<br>[0.7]         |
| Chad                               | Iron<br>[1.55]     | Vit A<br>[0.8]       | Diarrhea<br>[1.39]   | Neonatal<br>[0.89]   | PEM<br>[1.07]        | Dermatitis<br>[0.92] | Congenital<br>[0.96] | Malaria<br>[0.83]    | Oth NTD<br>[0.84]    | Epilepsy<br>[1.0]    |
| Cote d'Ivoire                      | Iron<br>[1.36]     | Vit A<br>[1.12]      | Neonatal<br>[1.04]   | Diarrhea<br>[1.33]   | Dermatitis<br>[0.85] | Congenital<br>[1.01] | Hemog<br>[2.31]      | Asthma<br>[0.65]     | Epilepsy<br>[1.28]   | Malaria<br>[6.92]    |
| Gambia                             | Iron<br>[1.77]     | Vit A<br>[1.03]      | Neonatal<br>[1.53]   | Diarrhea<br>[1.15]   | Dermatitis<br>[0.86] | PEM<br>[2.6]         | Congenital<br>[0.95] | Asthma<br>[0.57]     | Urticaria<br>[0.87]  | Hemog<br>[1.71]      |
| Ghana                              | Iron<br>[1.84]     | Vit A<br>[1.6]       | Neonatal<br>[1.22]   | Diarrhea<br>[1.26]   | Congenital<br>[1.02] | Dermatitis<br>[0.54] | Malaria<br>[104.25]  | Epilepsy<br>[1.41]   | Urticaria<br>[0.85]  | Asthma<br>[0.45]     |
| Guinea                             | Iron<br>[1.34]     | Vit A<br>[0.86]      | Neonatal<br>[1.06]   | Diarrhea<br>[0.98]   | Malaria<br>[3.45]    | Dermatitis<br>[0.9]  | Congenital<br>[1.0]  | Hemog<br>[1.98]      | Asthma<br>[0.75]     | Epilepsy<br>[1.05]   |
| Guinea-Bissau                      | Iron<br>[1.35]     | Vit A<br>[0.98]      | Neonatal<br>[1.3]    | Diarrhea<br>[0.77]   | Dermatitis<br>[0.89] | Congenital<br>[1.06] | Epilepsy<br>[1.16]   | Asthma<br>[0.58]     | Urticaria<br>[0.91]  | Skin Viral<br>[0.93] |
| Liberia                            | Iron<br>[1.2]      | Vit A<br>[0.68]      | Diarrhea<br>[1.48]   | Neonatal<br>[1.23]   | Dermatitis<br>[0.9]  | Malaria<br>[2.22]    | Congenital<br>[1.0]  | Hemog<br>[1.93]      | Epilepsy<br>[1.38]   | Asthma<br>[0.63]     |
| Mali                               | Iron<br>[1.67]     | Vit A<br>[0.89]      | Neonatal<br>[1.02]   | PEM<br>[1.04]        | Diarrhea<br>[0.61]   | Malaria<br>[1.55]    | Dermatitis<br>[0.85] | Congenital<br>[0.97] | Oth NTD<br>[0.93]    | Urticaria<br>[0.93]  |

**eFigure 9c. Leading ten causes of YLDs with the ratio of observed YLDs to YLDs expected on the basis of Socio-Demographic Index alone in 2017, 1-4 years, both sexes combined.**  
 The top ten causes contributing to YLDs are listed globally, by socio-demographic quintile, and then by GBD superregion, region, country, and subnationally where modeled. For each cell, the ratio of observed YLDs to YLDs expected on the basis of socio-demographic index (SDI) alone are listed. Abbreviations: YLD=year of life lived with disability, GBD=Global Burden of Disease.

Values shown in brackets represent the ratio of observed YLDs to predicted YLDs on the basis of Socio-Demographic Index (SDI), rounded to two (2) digits. Color ranges (shown below) were calculated to place a roughly equal number of cells into each bin.

| COLOR KEY:        |                    | [0.0-0.72]         | [0.72-0.84]        | [0.84-0.92]          | [0.92-1.01]          | [1.01-1.09]          | [1.09-1.17]          | [1.17-1.32]          | [1.32-1.67]         | 1.67+                |
|-------------------|--------------------|--------------------|--------------------|----------------------|----------------------|----------------------|----------------------|----------------------|---------------------|----------------------|
|                   | 1                  | 2                  | 3                  | 4                    | 5                    | 6                    | 7                    | 8                    | 9                   | 10                   |
| Mauritania        | PEM<br>[53.68]     | Iron<br>[1.83]     | Vit A<br>[1.32]    | Neonatal<br>[1.36]   | Diarrhea<br>[1.04]   | Dermatitis<br>[0.83] | Asthma<br>[0.76]     | Congenital<br>[0.94] | Epilepsy<br>[1.25]  | Urticaria<br>[0.84]  |
| Niger             | Iron<br>[0.86]     | Vit A<br>[0.65]    | PEM<br>[0.89]      | Neonatal<br>[1.01]   | Diarrhea<br>[0.67]   | Malaria<br>[1.32]    | Dermatitis<br>[0.95] | Congenital<br>[0.95] | Asthma<br>[0.68]    | Hemog<br>[0.86]      |
| Nigeria           | Iron<br>[2.01]     | Vit A<br>[1.2]     | Neonatal<br>[0.74] | Dermatitis<br>[0.81] | PEM<br>[10.78]       | Diarrhea<br>[0.96]   | Congenital<br>[1.38] | Malaria<br>[48.34]   | Hemog<br>[3.21]     | Asthma<br>[0.54]     |
| Sao Tome Principe | Neonatal<br>[1.37] | Vit A<br>[0.83]    | Diarrhea<br>[1.24] | Dermatitis<br>[0.84] | Iron<br>[0.54]       | Congenital<br>[1.0]  | Asthma<br>[0.56]     | Epilepsy<br>[1.29]   | Urticaria<br>[0.86] | Skin Viral<br>[0.89] |
| Senegal           | Iron<br>[1.26]     | Neonatal<br>[1.52] | Vit A<br>[0.85]    | Diarrhea<br>[1.3]    | Dermatitis<br>[0.88] | Congenital<br>[0.98] | Epilepsy<br>[1.12]   | Urticaria<br>[0.89]  | Asthma<br>[0.5]     | Skin Viral<br>[0.92] |
| Sierra Leone      | Iron<br>[1.6]      | Vit A<br>[0.87]    | Malaria<br>[6.98]  | Neonatal<br>[0.89]   | Diarrhea<br>[0.76]   | Dermatitis<br>[0.88] | Hemog<br>[2.53]      | Congenital<br>[0.9]  | Epilepsy<br>[1.26]  | Asthma<br>[0.62]     |
| Togo              | Iron<br>[1.35]     | Vit A<br>[0.97]    | Neonatal<br>[1.26] | Diarrhea<br>[1.29]   | Malaria<br>[21.01]   | Dermatitis<br>[0.85] | PEM<br>[3.06]        | Congenital<br>[1.0]  | Asthma<br>[0.66]    | Epilepsy<br>[1.23]   |

**eFigure 9d. Leading ten causes of YLDs with the ratio of observed YLDs to YLDs expected on the basis of Socio-Demographic Index alone in 2017, 5-9 years, both sexes combined.**  
The top ten causes contributing to YLDs are listed globally, by socio-demographic quintile, and then by GBD superregion, region, country, and subnationally where modeled. For each cell, the ratio of observed YLDs to YLDs expected on the basis of socio-demographic index (SDI) alone are listed. Abbreviations: YLD=year of life lived with disability, GBD=Global Burden of Disease.

Values shown in brackets represent the ratio of observed YLDs to predicted YLDs on the basis of Socio-Demographic Index (SDI), rounded to two (2) digits. Color ranges (shown below) were calculated to place a roughly equal number of cells into each bin.

| COLOR KEY:                                       |                      | [0.0-0.8]            | [0.8-0.89]           | [0.89-0.97]          | [0.97-1.02]            | [1.02-1.1]           | [1.1-1.24]             | [1.24-1.42]            | [1.42-1.91]          | 1.91+                  |
|--------------------------------------------------|----------------------|----------------------|----------------------|----------------------|------------------------|----------------------|------------------------|------------------------|----------------------|------------------------|
|                                                  | 1                    | 2                    | 3                    | 4                    | 5                      | 6                    | 7                      | 8                      | 9                    | 10                     |
| Global                                           | Iron<br>[2.11]       | Vit A<br>[1.74]      | Neonatal<br>[1.07]   | Dermatitis<br>[0.78] | Asthma<br>[0.74]       | Skin Viral<br>[0.9]  | Congenital<br>[0.99]   | Conduct<br>[0.86]      | Anxiety<br>[0.85]    | Diarrhea<br>[1.06]     |
| Low SDI                                          | Iron<br>[1.24]       | Vit A<br>[1.04]      | Neonatal<br>[1.42]   | Dermatitis<br>[0.85] | Congenital<br>[1.05]   | Asthma<br>[0.66]     | Skin Viral<br>[0.93]   | Diarrhea<br>[0.91]     | Conduct<br>[0.92]    | Epilepsy<br>[0.92]     |
| Low-middle SDI                                   | Iron<br>[1.77]       | Vit A<br>[1.32]      | Neonatal<br>[1.13]   | Dermatitis<br>[0.77] | Asthma<br>[0.65]       | Congenital<br>[1.06] | Skin Viral<br>[0.89]   | Conduct<br>[0.9]       | Diarrhea<br>[1.0]    | Hemog<br>[2.18]        |
| Middle SDI                                       | Neonatal<br>[1.18]   | Iron<br>[1.07]       | Vit A<br>[1.14]      | Asthma<br>[0.87]     | Dermatitis<br>[0.69]   | Skin Viral<br>[0.93] | Congenital<br>[0.92]   | Conduct<br>[0.81]      | Anxiety<br>[0.76]    | Epilepsy<br>[0.94]     |
| High-middle SDI                                  | Neonatal<br>[1.31]   | Asthma<br>[1.0]      | Dermatitis<br>[0.59] | Iron<br>[3.49]       | Skin Viral<br>[0.94]   | Conduct<br>[0.86]    | Vit A<br>[2.36]        | Congenital<br>[0.91]   | Anxiety<br>[0.71]    | Diarrhea<br>[1.9]      |
| High SDI                                         | Dermatitis<br>[1.18] | Neonatal<br>[0.88]   | Asthma<br>[0.97]     | Anxiety<br>[1.16]    | Skin Viral<br>[1.01]   | Conduct<br>[1.0]     | Congenital<br>[0.89]   | URI<br>[1.16]          | Falls<br>[1.28]      | ASD<br>[1.2]           |
| Central Europe, Eastern Europe, and Central Asia | Neonatal<br>[1.35]   | Iron<br>[2.39]       | Dermatitis<br>[0.59] | Vit A<br>[1.28]      | Congenital<br>[1.06]   | Conduct<br>[0.92]    | Asthma<br>[0.61]       | Upper Digest<br>[6.45] | Falls<br>[1.62]      | Skin Viral<br>[0.8]    |
| Central Asia                                     | Iron<br>[2.18]       | Vit A<br>[1.53]      | Neonatal<br>[0.94]   | Dermatitis<br>[0.52] | Congenital<br>[1.04]   | Conduct<br>[0.91]    | Asthma<br>[0.55]       | Skin Viral<br>[0.81]   | Epilepsy<br>[1.28]   | Urticaria<br>[1.1]     |
| Armenia                                          | Iron<br>[3.52]       | Neonatal<br>[0.96]   | Dermatitis<br>[0.52] | Congenital<br>[1.04] | Conduct<br>[0.91]      | Diarrhea<br>[1.44]   | Skin Viral<br>[0.81]   | Asthma<br>[0.53]       | Epilepsy<br>[1.21]   | Urticaria<br>[1.15]    |
| Azerbaijan                                       | Neonatal<br>[0.92]   | Iron<br>[1.07]       | Vit A<br>[0.88]      | Dermatitis<br>[0.52] | Congenital<br>[1.02]   | Conduct<br>[0.92]    | Skin Viral<br>[0.81]   | Epilepsy<br>[1.34]     | Asthma<br>[0.52]     | Diarrhea<br>[1.27]     |
| Georgia                                          | Neonatal<br>[0.96]   | Iron<br>[1.08]       | Vit A<br>[1.07]      | Congenital<br>[1.06] | Conduct<br>[0.91]      | Dermatitis<br>[0.47] | Skin Viral<br>[0.81]   | Diarrhea<br>[1.43]     | Epilepsy<br>[1.26]   | Asthma<br>[0.5]        |
| Kazakhstan                                       | Vit A<br>[3.06]      | Neonatal<br>[1.02]   | Iron<br>[1.74]       | Congenital<br>[1.08] | Dermatitis<br>[0.47]   | Conduct<br>[0.9]     | Skin Viral<br>[0.8]    | Epilepsy<br>[1.45]     | Asthma<br>[0.45]     | Urticaria<br>[1.25]    |
| Kyrgyzstan                                       | Iron<br>[1.79]       | Vit A<br>[1.2]       | Neonatal<br>[1.01]   | Dermatitis<br>[0.56] | Congenital<br>[1.07]   | Asthma<br>[0.6]      | Hernia<br>[5.31]       | Conduct<br>[0.93]      | Skin Viral<br>[0.85] | Epilepsy<br>[1.06]     |
| Mongolia                                         | Vit A<br>[2.03]      | Iron<br>[1.5]        | Neonatal<br>[0.98]   | Dermatitis<br>[0.54] | Congenital<br>[1.07]   | Conduct<br>[0.91]    | Epilepsy<br>[1.27]     | Skin Viral<br>[0.82]   | Asthma<br>[0.53]     | Urticaria<br>[1.08]    |
| Tajikistan                                       | Iron<br>[1.02]       | Vit A<br>[1.15]      | Neonatal<br>[1.05]   | Dermatitis<br>[0.58] | Congenital<br>[1.07]   | Conduct<br>[0.96]    | Epilepsy<br>[1.08]     | Skin Viral<br>[0.87]   | Diarrhea<br>[0.93]   | Asthma<br>[0.47]       |
| Turkmenistan                                     | Iron<br>[1.36]       | Neonatal<br>[0.84]   | Vit A<br>[1.29]      | Dermatitis<br>[0.52] | Congenital<br>[1.05]   | Conduct<br>[0.91]    | Skin Viral<br>[0.81]   | Epilepsy<br>[1.3]      | Asthma<br>[0.52]     | Urticaria<br>[1.15]    |
| Uzbekistan                                       | Iron<br>[2.48]       | Neonatal<br>[0.9]    | Vit A<br>[0.99]      | Dermatitis<br>[0.55] | Asthma<br>[0.62]       | Congenital<br>[1.03] | Conduct<br>[0.92]      | Epilepsy<br>[1.22]     | Skin Viral<br>[0.83] | Urticaria<br>[1.04]    |
| Central Europe                                   | Neonatal<br>[1.39]   | Dermatitis<br>[0.64] | Vit A<br>[2.77]      | Falls<br>[2.06]      | Diarrhea<br>[2.76]     | Congenital<br>[1.19] | Asthma<br>[0.67]       | Conduct<br>[0.9]       | Iron<br>[1.98]       | Skin Viral<br>[0.79]   |
| Albania                                          | Neonatal<br>[1.17]   | Vit A<br>[1.65]      | Falls<br>[3.22]      | Congenital<br>[1.13] | Iron<br>[0.66]         | Conduct<br>[0.91]    | Diarrhea<br>[1.44]     | Dermatitis<br>[0.46]   | Skin Viral<br>[0.8]  | Upper Digest<br>[5.33] |
| Bosnia                                           | Neonatal<br>[1.35]   | Vit A<br>[1.87]      | Falls<br>[3.05]      | Dermatitis<br>[0.58] | Congenital<br>[1.15]   | Iron<br>[0.83]       | Asthma<br>[0.64]       | Conduct<br>[0.9]       | Diarrhea<br>[1.49]   | Skin Viral<br>[0.8]    |
| Bulgaria                                         | Neonatal<br>[1.24]   | Vit A<br>[2.07]      | Falls<br>[2.12]      | Congenital<br>[1.23] | Dermatitis<br>[0.52]   | Diarrhea<br>[2.32]   | Conduct<br>[0.9]       | Skin Viral<br>[0.79]   | Asthma<br>[0.54]     | Anxiety<br>[0.69]      |
| Croatia                                          | Neonatal<br>[1.51]   | Dermatitis<br>[0.54] | Congenital<br>[1.17] | Diarrhea<br>[2.42]   | Conduct<br>[0.9]       | Falls<br>[1.34]      | Asthma<br>[0.63]       | Vit A<br>[1.96]        | Skin Viral<br>[0.8]  | Anxiety<br>[0.64]      |
| Czech                                            | Neonatal<br>[0.93]   | Falls<br>[2.31]      | Dermatitis<br>[0.66] | Diarrhea<br>[3.24]   | Congenital<br>[1.16]   | Conduct<br>[0.91]    | Skin Viral<br>[0.81]   | Asthma<br>[0.54]       | Anxiety<br>[0.63]    | Urticaria<br>[1.65]    |
| Hungary                                          | Neonatal<br>[1.34]   | Diarrhea<br>[4.17]   | Dermatitis<br>[0.75] | Falls<br>[2.11]      | Congenital<br>[1.23]   | Vit A<br>[2.02]      | Conduct<br>[0.9]       | Skin Viral<br>[0.8]    | Asthma<br>[0.52]     | Anxiety<br>[0.64]      |
| Macedonia                                        | Neonatal<br>[1.33]   | Vit A<br>[2.38]      | Iron<br>[1.79]       | Falls<br>[2.44]      | Dermatitis<br>[0.54]   | Congenital<br>[1.13] | Diarrhea<br>[1.96]     | Asthma<br>[0.66]       | Conduct<br>[0.9]     | Skin Viral<br>[0.8]    |
| Montenegro                                       | Neonatal<br>[1.31]   | Vit A<br>[2.67]      | Falls<br>[2.22]      | Dermatitis<br>[0.56] | Congenital<br>[1.15]   | Iron<br>[1.57]       | Conduct<br>[0.9]       | Skin Viral<br>[0.79]   | Asthma<br>[0.59]     | Upper Digest<br>[5.32] |
| Poland                                           | Neonatal<br>[1.55]   | Dermatitis<br>[0.73] | Falls<br>[1.86]      | Asthma<br>[0.87]     | Congenital<br>[1.2]    | Diarrhea<br>[2.71]   | Vit A<br>[2.68]        | Upper Digest<br>[7.88] | Conduct<br>[0.91]    | Skin Viral<br>[0.81]   |
| Romania                                          | Neonatal<br>[1.43]   | Iron<br>[4.52]       | Vit A<br>[3.43]      | Diarrhea<br>[3.1]    | Upper Digest<br>[9.95] | Falls<br>[2.17]      | Dermatitis<br>[0.6]    | Congenital<br>[1.18]   | Asthma<br>[0.7]      | Conduct<br>[0.89]      |
| Serbia                                           | Neonatal<br>[1.72]   | Vit A<br>[1.57]      | Falls<br>[2.6]       | Dermatitis<br>[0.56] | Congenital<br>[1.22]   | Conduct<br>[0.91]    | Diarrhea<br>[1.73]     | Skin Viral<br>[0.8]    | Anxiety<br>[0.7]     | Asthma<br>[0.45]       |
| Slovakia                                         | Neonatal<br>[1.03]   | Dermatitis<br>[0.66] | Diarrhea<br>[3.52]   | Vit A<br>[3.42]      | Falls<br>[1.89]        | Congenital<br>[1.26] | Upper Digest<br>[8.12] | Conduct<br>[0.91]      | Skin Viral<br>[0.8]  | Anxiety<br>[0.63]      |
| Slovenia                                         | Neonatal<br>[1.1]    | Falls<br>[2.23]      | Diarrhea<br>[3.23]   | Dermatitis<br>[0.54] | Congenital<br>[1.26]   | Asthma<br>[0.77]     | Vit A<br>[2.75]        | Conduct<br>[0.92]      | Skin Viral<br>[0.81] | Upper Digest<br>[6.21] |

**eFigure 9d. Leading ten causes of YLDs with the ratio of observed YLDs to YLDs expected on the basis of Socio-Demographic Index alone in 2017, 5-9 years, both sexes combined.**  
The top ten causes contributing to YLDs are listed globally, by socio-demographic quintile, and then by GBD superregion, region, country, and subnationally where modeled. For each cell, the ratio of observed YLDs to YLDs expected on the basis of socio-demographic index (SDI) alone are listed. Abbreviations: YLD=year of life lived with disability, GBD=Global Burden of Disease.

Values shown in brackets represent the ratio of observed YLDs to predicted YLDs on the basis of Socio-Demographic Index (SDI), rounded to two (2) digits. Color ranges (shown below) were calculated to place a roughly equal number of cells into each bin.

| COLOR KEY:                      |                      | [0.0-0.8]               | [0.8-0.89]              | [0.89-0.97]          | [0.97-1.02]          | [1.02-1.1]           | [1.1-1.24]           | [1.24-1.42]          | [1.42-1.91]          | 1.91+                |
|---------------------------------|----------------------|-------------------------|-------------------------|----------------------|----------------------|----------------------|----------------------|----------------------|----------------------|----------------------|
|                                 | 1                    | 2                       | 3                       | 4                    | 5                    | 6                    | 7                    | 8                    | 9                    | 10                   |
| <b>Eastern Europe</b>           | Neonatal<br>[1.62]   | Iron<br>[2.37]          | Upper Digest<br>[10.59] | Dermatitis<br>[0.62] | Conduct<br>[0.94]    | Falls<br>[1.64]      | Congenital<br>[1.01] | Asthma<br>[0.62]     | Skin Viral<br>[0.79] | Diarrhea<br>[1.58]   |
| Belarus                         | Neonatal<br>[1.59]   | Dermatitis<br>[0.74]    | Upper Digest<br>[11.12] | Asthma<br>[0.73]     | Falls<br>[1.65]      | Conduct<br>[0.9]     | Congenital<br>[0.99] | Skin Viral<br>[0.8]  | Urticaria<br>[1.35]  | Iron<br>[0.84]       |
| Estonia                         | Neonatal<br>[1.69]   | Dermatitis<br>[0.91]    | Upper Digest<br>[11.64] | Iron<br>[3.49]       | Falls<br>[1.3]       | Conduct<br>[0.92]    | Diarrhea<br>[2.52]   | Congenital<br>[1.04] | Skin Viral<br>[0.82] | Asthma<br>[0.52]     |
| Latvia                          | Neonatal<br>[1.52]   | Upper Digest<br>[11.97] | Dermatitis<br>[0.64]    | Diarrhea<br>[2.46]   | Asthma<br>[0.73]     | Falls<br>[1.44]      | Conduct<br>[0.9]     | Iron<br>[2.29]       | Congenital<br>[0.96] | Skin Viral<br>[1.11] |
| Lithuania                       | Neonatal<br>[1.74]   | Upper Digest<br>[14.1]  | Diarrhea<br>[2.89]      | Congenital<br>[1.11] | Falls<br>[1.37]      | Conduct<br>[0.91]    | Skin Viral<br>[0.81] | Asthma<br>[0.63]     | Dermatitis<br>[0.37] | Urticaria<br>[1.59]  |
| Moldova                         | Neonatal<br>[1.67]   | Iron<br>[1.67]          | Upper Digest<br>[11.88] | Dermatitis<br>[0.79] | Falls<br>[2.61]      | Congenital<br>[0.99] | Conduct<br>[0.9]     | Asthma<br>[0.56]     | Skin Viral<br>[0.81] | Urticaria<br>[1.11]  |
| Russian Federation              | Neonatal<br>[1.62]   | Iron<br>[2.55]          | Upper Digest<br>[10.45] | Dermatitis<br>[0.62] | Falls<br>[1.63]      | Conduct<br>[0.94]    | Congenital<br>[1.0]  | Skin Viral<br>[0.79] | Asthma<br>[0.58]     | Diarrhea<br>[1.8]    |
| Ukraine                         | Neonatal<br>[1.6]    | Iron<br>[1.66]          | Upper Digest<br>[10.12] | Dermatitis<br>[0.64] | Asthma<br>[0.71]     | Congenital<br>[1.06] | Conduct<br>[0.95]    | Falls<br>[1.84]      | Skin Viral<br>[0.8]  | Urticaria<br>[1.37]  |
| <b>High-income</b>              | Dermatitis<br>[1.16] | Neonatal<br>[0.89]      | Asthma<br>[1.1]         | Anxiety<br>[1.08]    | Skin Viral<br>[1.03] | Conduct<br>[1.02]    | Congenital<br>[0.92] | URI<br>[1.07]        | Falls<br>[0.81]      | ASD<br>[1.14]        |
| <b>Australasia</b>              | Asthma<br>[2.05]     | Dermatitis<br>[1.07]    | Falls<br>[2.43]         | Neonatal<br>[0.9]    | Anxiety<br>[1.15]    | Conduct<br>[1.07]    | Skin Viral<br>[1.01] | URI<br>[0.95]        | Congenital<br>[0.76] | Mech<br>[5.31]       |
| Australia                       | Asthma<br>[2.09]     | Dermatitis<br>[1.01]    | Neonatal<br>[0.88]      | Falls<br>[2.31]      | Anxiety<br>[1.11]    | Conduct<br>[1.07]    | Skin Viral<br>[1.01] | URI<br>[0.94]        | Congenital<br>[0.76] | ASD<br>[1.02]        |
| New Zealand                     | Dermatitis<br>[1.36] | Asthma<br>[1.82]        | Falls<br>[3.16]         | Neonatal<br>[1.01]   | Anxiety<br>[1.38]    | Conduct<br>[1.09]    | Skin Viral<br>[0.98] | Mech<br>[7.47]       | URI<br>[0.99]        | Congenital<br>[0.76] |
| <b>High-income Asia Pacific</b> | Dermatitis<br>[1.24] | Neonatal<br>[1.16]      | Asthma<br>[0.93]        | Skin Viral<br>[1.01] | Anxiety<br>[0.8]     | Falls<br>[1.16]      | Conduct<br>[0.88]    | Diarrhea<br>[2.36]   | Congenital<br>[0.94] | URI<br>[0.97]        |
| Brunei                          | Dermatitis<br>[1.16] | Neonatal<br>[1.13]      | Iron<br>[5.03]          | Asthma<br>[0.85]     | Skin Viral<br>[1.0]  | Anxiety<br>[0.83]    | Conduct<br>[0.85]    | Diarrhea<br>[2.32]   | Falls<br>[1.1]       | Congenital<br>[0.76] |
| Japan                           | Dermatitis<br>[1.3]  | Neonatal<br>[1.14]      | Asthma<br>[0.94]        | Skin Viral<br>[1.0]  | Falls<br>[1.25]      | Conduct<br>[0.91]    | Congenital<br>[1.04] | Anxiety<br>[0.78]    | Diarrhea<br>[2.22]   | URI<br>[0.99]        |
| Aichi                           | Dermatitis<br>[1.31] | Neonatal<br>[1.17]      | Asthma<br>[0.96]        | Skin Viral<br>[1.01] | ASD<br>[1.98]        | Falls<br>[1.21]      | Conduct<br>[0.91]    | Anxiety<br>[0.78]    | Congenital<br>[0.95] | Diarrhea<br>[2.35]   |
| Akita                           | Dermatitis<br>[1.31] | Neonatal<br>[1.23]      | Asthma<br>[0.91]        | Skin Viral<br>[0.98] | Congenital<br>[1.13] | Falls<br>[1.37]      | Conduct<br>[0.89]    | Anxiety<br>[0.81]    | Diarrhea<br>[2.08]   | Iron<br>[1.95]       |
| Aomori                          | Dermatitis<br>[1.31] | Neonatal<br>[1.15]      | Asthma<br>[0.9]         | Skin Viral<br>[0.98] | Falls<br>[1.39]      | Conduct<br>[0.89]    | Anxiety<br>[0.81]    | Diarrhea<br>[2.07]   | Vit A<br>[1.9]       | Congenital<br>[0.86] |
| Chiba                           | Dermatitis<br>[1.31] | Neonatal<br>[1.13]      | Asthma<br>[0.94]        | Skin Viral<br>[1.0]  | Falls<br>[1.27]      | Congenital<br>[1.07] | Conduct<br>[0.9]     | Anxiety<br>[0.79]    | URI<br>[1.0]         | Vit A<br>[2.06]      |
| Ehime                           | Dermatitis<br>[1.31] | Neonatal<br>[0.94]      | Asthma<br>[0.9]         | Skin Viral<br>[0.98] | Falls<br>[1.33]      | Conduct<br>[0.9]     | Anxiety<br>[0.8]     | Congenital<br>[0.95] | Vit A<br>[1.94]      | URI<br>[1.01]        |
| Fukui                           | Dermatitis<br>[1.31] | Neonatal<br>[1.12]      | Asthma<br>[0.92]        | Skin Viral<br>[0.99] | Falls<br>[1.29]      | Conduct<br>[0.9]     | Anxiety<br>[0.79]    | Diarrhea<br>[2.31]   | Congenital<br>[0.92] | URI<br>[1.0]         |
| Fukuoka                         | Dermatitis<br>[1.31] | Neonatal<br>[1.12]      | Asthma<br>[0.94]        | Skin Viral<br>[1.0]  | Falls<br>[1.28]      | Conduct<br>[0.9]     | Anxiety<br>[0.79]    | Congenital<br>[0.98] | Diarrhea<br>[1.95]   | Iron<br>[2.35]       |
| Fukushima                       | Dermatitis<br>[1.31] | Neonatal<br>[1.06]      | Asthma<br>[0.89]        | Skin Viral<br>[0.98] | Diarrhea<br>[2.38]   | Falls<br>[1.37]      | Congenital<br>[1.03] | Conduct<br>[0.89]    | Anxiety<br>[0.8]     | URI<br>[1.01]        |
| Gifu                            | Dermatitis<br>[1.31] | Neonatal<br>[1.16]      | Asthma<br>[0.93]        | Skin Viral<br>[0.99] | Iron<br>[3.04]       | Falls<br>[1.3]       | Conduct<br>[0.9]     | Diarrhea<br>[2.33]   | Anxiety<br>[0.79]    | Congenital<br>[0.82] |
| Gunma                           | Dermatitis<br>[1.3]  | Neonatal<br>[1.1]       | Asthma<br>[0.93]        | Skin Viral<br>[0.99] | Falls<br>[1.3]       | Conduct<br>[0.9]     | Diarrhea<br>[2.34]   | Anxiety<br>[0.79]    | Congenital<br>[0.98] | Iron<br>[2.23]       |
| Hiroshima                       | Dermatitis<br>[1.31] | Neonatal<br>[1.18]      | Asthma<br>[0.95]        | Skin Viral<br>[1.0]  | Falls<br>[1.23]      | Conduct<br>[0.91]    | Anxiety<br>[0.78]    | Diarrhea<br>[2.3]    | Congenital<br>[0.92] | URI<br>[0.99]        |
| Hokkaido                        | Dermatitis<br>[1.31] | Neonatal<br>[1.1]       | Asthma<br>[0.92]        | Skin Viral<br>[0.98] | Falls<br>[1.34]      | Diarrhea<br>[2.34]   | Conduct<br>[0.89]    | Congenital<br>[1.02] | Anxiety<br>[0.8]     | Vit A<br>[2.18]      |
| Hyogo                           | Dermatitis<br>[1.31] | Neonatal<br>[1.15]      | Asthma<br>[0.8]         | Skin Viral<br>[1.0]  | Falls<br>[1.25]      | Conduct<br>[0.9]     | Anxiety<br>[0.78]    | Diarrhea<br>[2.35]   | URI<br>[1.0]         | Iron<br>[2.39]       |
| Ibaraki                         | Dermatitis<br>[1.31] | Neonatal<br>[1.19]      | Asthma<br>[0.93]        | Skin Viral<br>[0.99] | Congenital<br>[1.09] | Falls<br>[1.28]      | Conduct<br>[0.9]     | Anxiety<br>[0.79]    | Vit A<br>[2.37]      | Diarrhea<br>[1.99]   |
| Ishikawa                        | Dermatitis<br>[1.31] | Neonatal<br>[1.1]       | Asthma<br>[0.94]        | Skin Viral<br>[0.99] | Falls<br>[1.28]      | Conduct<br>[0.89]    | Congenital<br>[1.02] | Anxiety<br>[0.79]    | Diarrhea<br>[2.32]   | URI<br>[1.0]         |
| Iwate                           | Dermatitis<br>[1.31] | Neonatal<br>[1.18]      | Asthma<br>[0.9]         | Skin Viral<br>[0.97] | Congenital<br>[1.08] | Falls<br>[1.39]      | Conduct<br>[0.89]    | Anxiety<br>[0.81]    | Diarrhea<br>[2.07]   | Vit A<br>[1.62]      |

**eFigure 9d. Leading ten causes of YLDs with the ratio of observed YLDs to YLDs expected on the basis of Socio-Demographic Index alone in 2017, 5-9 years, both sexes combined.**  
The top ten causes contributing to YLDs are listed globally, by socio-demographic quintile, and then by GBD superregion, region, country, and subnationally where modeled. For each cell, the ratio of observed YLDs to YLDs expected on the basis of socio-demographic index (SDI) alone are listed. Abbreviations: YLD=year of life lived with disability, GBD=Global Burden of Disease.

Values shown in brackets represent the ratio of observed YLDs to predicted YLDs on the basis of Socio-Demographic Index (SDI), rounded to two (2) digits. Color ranges (shown below) were calculated to place a roughly equal number of cells into each bin.

| COLOR KEY: |                      | [0.0-0.8]            | [0.8-0.89]           | [0.89-0.97]          | [0.97-1.02]          | [1.02-1.1]           | [1.1-1.24]           | [1.24-1.42]          | [1.42-1.91]          | 1.91+                |
|------------|----------------------|----------------------|----------------------|----------------------|----------------------|----------------------|----------------------|----------------------|----------------------|----------------------|
|            | 1                    | 2                    | 3                    | 4                    | 5                    | 6                    | 7                    | 8                    | 9                    | 10                   |
| Kagawa     | Dermatitis<br>[1.3]  | Neonatal<br>[1.08]   | Asthma<br>[0.92]     | Diarrhea<br>[3.07]   | Skin Viral<br>[0.99] | Falls<br>[1.28]      | Conduct<br>[0.9]     | Anxiety<br>[0.79]    | Congenital<br>[0.99] | URI<br>[1.0]         |
| Kagoshima  | Dermatitis<br>[1.31] | Neonatal<br>[0.98]   | Asthma<br>[0.89]     | Skin Viral<br>[0.98] | Congenital<br>[1.14] | Falls<br>[1.36]      | Conduct<br>[0.89]    | Diarrhea<br>[2.17]   | Anxiety<br>[0.81]    | Iron<br>[2.0]        |
| Kanagawa   | Dermatitis<br>[1.31] | Neonatal<br>[1.19]   | Asthma<br>[0.98]     | Skin Viral<br>[1.01] | Congenital<br>[1.2]  | Falls<br>[1.23]      | Conduct<br>[0.91]    | Anxiety<br>[0.78]    | ASD<br>[1.59]        | URI<br>[0.99]        |
| Kochi      | Dermatitis<br>[1.31] | Neonatal<br>[1.05]   | Asthma<br>[0.89]     | Skin Viral<br>[0.98] | Falls<br>[1.36]      | Conduct<br>[0.88]    | Congenital<br>[0.97] | Anxiety<br>[0.81]    | Diarrhea<br>[2.09]   | Iron<br>[1.79]       |
| Kumamoto   | Dermatitis<br>[1.31] | Neonatal<br>[1.03]   | Asthma<br>[0.9]      | Skin Viral<br>[0.98] | Falls<br>[1.37]      | Conduct<br>[0.89]    | Anxiety<br>[0.81]    | Congenital<br>[0.92] | Iron<br>[2.05]       | Diarrhea<br>[1.87]   |
| Kyoto      | Neonatal<br>[1.19]   | Dermatitis<br>[1.04] | Asthma<br>[0.97]     | Congenital<br>[1.29] | Skin Viral<br>[1.01] | Falls<br>[1.22]      | Conduct<br>[0.92]    | Anxiety<br>[0.77]    | Diarrhea<br>[2.39]   | URI<br>[0.98]        |
| Mie        | Dermatitis<br>[1.31] | Neonatal<br>[1.17]   | Asthma<br>[0.93]     | Skin Viral<br>[0.99] | Diarrhea<br>[2.73]   | Falls<br>[1.26]      | Conduct<br>[0.9]     | Anxiety<br>[0.79]    | Congenital<br>[0.91] | URI<br>[1.0]         |
| Miyagi     | Dermatitis<br>[1.31] | Neonatal<br>[1.09]   | Skin Viral<br>[0.99] | Asthma<br>[0.77]     | Congenital<br>[1.15] | Falls<br>[1.3]       | Conduct<br>[0.9]     | Anxiety<br>[0.79]    | Diarrhea<br>[2.1]    | URI<br>[1.0]         |
| Miyazaki   | Dermatitis<br>[1.31] | Neonatal<br>[1.03]   | Asthma<br>[0.89]     | Skin Viral<br>[0.98] | Falls<br>[1.4]       | Congenital<br>[1.02] | Conduct<br>[0.89]    | Anxiety<br>[0.81]    | URI<br>[1.01]        | ASD<br>[1.34]        |
| Nagano     | Dermatitis<br>[1.31] | Neonatal<br>[1.19]   | Asthma<br>[0.93]     | Diarrhea<br>[2.84]   | Skin Viral<br>[0.99] | Falls<br>[1.31]      | Conduct<br>[0.9]     | Anxiety<br>[0.79]    | Congenital<br>[0.95] | URI<br>[1.01]        |
| Nagasaki   | Dermatitis<br>[1.31] | Neonatal<br>[1.03]   | Asthma<br>[0.89]     | Congenital<br>[1.15] | Skin Viral<br>[0.98] | Falls<br>[1.39]      | Conduct<br>[0.89]    | Anxiety<br>[0.81]    | Diarrhea<br>[1.72]   | URI<br>[1.02]        |
| Nara       | Dermatitis<br>[1.31] | Neonatal<br>[1.02]   | Asthma<br>[0.92]     | Congenital<br>[1.26] | Skin Viral<br>[0.99] | Falls<br>[1.31]      | Conduct<br>[0.9]     | Anxiety<br>[0.8]     | Diarrhea<br>[2.26]   | Vit A<br>[2.1]       |
| Niigata    | Dermatitis<br>[1.3]  | Neonatal<br>[1.15]   | Asthma<br>[0.93]     | Skin Viral<br>[0.99] | Iron<br>[2.9]        | Congenital<br>[1.07] | Falls<br>[1.33]      | Conduct<br>[0.89]    | Anxiety<br>[0.8]     | Diarrhea<br>[2.16]   |
| Oita       | Dermatitis<br>[1.3]  | Neonatal<br>[1.2]    | Asthma<br>[0.91]     | Skin Viral<br>[0.99] | Diarrhea<br>[2.5]    | Falls<br>[1.31]      | Conduct<br>[0.9]     | Anxiety<br>[0.79]    | Congenital<br>[0.88] | URI<br>[1.0]         |
| Okayama    | Dermatitis<br>[1.3]  | Neonatal<br>[1.21]   | Asthma<br>[0.94]     | Skin Viral<br>[0.99] | Falls<br>[1.27]      | Conduct<br>[0.91]    | Anxiety<br>[0.79]    | Diarrhea<br>[2.08]   | Congenital<br>[0.87] | URI<br>[0.99]        |
| Okinawa    | Dermatitis<br>[1.31] | Neonatal<br>[1.08]   | Skin Viral<br>[0.98] | Asthma<br>[0.75]     | Vit A<br>[2.04]      | Falls<br>[1.43]      | Conduct<br>[0.88]    | Anxiety<br>[0.81]    | Diarrhea<br>[1.76]   | Congenital<br>[0.79] |
| Osaka      | Dermatitis<br>[1.31] | Neonatal<br>[1.09]   | Asthma<br>[0.97]     | Skin Viral<br>[1.01] | Congenital<br>[1.12] | Falls<br>[1.25]      | Conduct<br>[0.91]    | Anxiety<br>[0.78]    | Diarrhea<br>[2.15]   | URI<br>[0.99]        |
| Saga       | Dermatitis<br>[1.31] | Neonatal<br>[1.08]   | Asthma<br>[0.91]     | Skin Viral<br>[0.98] | Falls<br>[1.35]      | Conduct<br>[0.89]    | Anxiety<br>[0.8]     | Congenital<br>[0.93] | Diarrhea<br>[2.07]   | URI<br>[1.01]        |
| Saitama    | Dermatitis<br>[1.31] | Neonatal<br>[1.12]   | Asthma<br>[0.94]     | Skin Viral<br>[0.99] | Falls<br>[1.32]      | Conduct<br>[0.9]     | Anxiety<br>[0.79]    | Diarrhea<br>[2.08]   | Congenital<br>[0.88] | URI<br>[1.0]         |
| Shiga      | Dermatitis<br>[1.59] | Neonatal<br>[1.08]   | Asthma<br>[0.96]     | Skin Viral<br>[1.0]  | Falls<br>[1.24]      | Conduct<br>[0.91]    | Congenital<br>[1.05] | Anxiety<br>[0.78]    | Diarrhea<br>[2.38]   | URI<br>[0.99]        |
| Shimane    | Dermatitis<br>[1.31] | Neonatal<br>[1.06]   | Asthma<br>[0.89]     | Skin Viral<br>[0.98] | Falls<br>[1.36]      | Conduct<br>[0.9]     | Anxiety<br>[0.8]     | Diarrhea<br>[2.12]   | Congenital<br>[0.86] | URI<br>[1.01]        |
| Shizuoka   | Dermatitis<br>[1.31] | Neonatal<br>[1.25]   | Asthma<br>[0.94]     | Skin Viral<br>[1.0]  | Falls<br>[1.25]      | Conduct<br>[0.91]    | Anxiety<br>[0.79]    | Congenital<br>[0.94] | Diarrhea<br>[2.15]   | Vit A<br>[2.24]      |
| Tochigi    | Dermatitis<br>[1.31] | Neonatal<br>[1.2]    | Asthma<br>[0.94]     | Congenital<br>[1.4]  | Skin Viral<br>[0.99] | Falls<br>[1.27]      | Conduct<br>[0.9]     | Anxiety<br>[0.79]    | URI<br>[0.99]        | ASD<br>[1.33]        |
| Tokushima  | Dermatitis<br>[1.3]  | Neonatal<br>[1.14]   | Asthma<br>[0.91]     | Skin Viral<br>[0.99] | Diarrhea<br>[2.49]   | Falls<br>[1.29]      | Conduct<br>[0.9]     | Anxiety<br>[0.79]    | Congenital<br>[0.95] | URI<br>[1.0]         |
| Tokyo      | Dermatitis<br>[1.33] | Neonatal<br>[1.25]   | Asthma<br>[1.08]     | Congenital<br>[1.3]  | Skin Viral<br>[1.05] | Falls<br>[1.08]      | Conduct<br>[0.95]    | Anxiety<br>[0.76]    | URI<br>[0.97]        | Diarrhea<br>[2.49]   |
| Tottori    | Dermatitis<br>[1.3]  | Neonatal<br>[1.14]   | Asthma<br>[0.9]      | Skin Viral<br>[0.98] | Congenital<br>[1.11] | Falls<br>[1.34]      | Conduct<br>[0.9]     | Anxiety<br>[0.8]     | Iron<br>[2.27]       | Diarrhea<br>[1.78]   |
| Toyama     | Dermatitis<br>[1.3]  | Neonatal<br>[1.1]    | Asthma<br>[0.95]     | Skin Viral<br>[1.0]  | Falls<br>[1.25]      | Conduct<br>[0.91]    | Iron<br>[3.01]       | Diarrhea<br>[2.43]   | Anxiety<br>[0.78]    | Congenital<br>[0.96] |
| Wakayama   | Dermatitis<br>[1.31] | Neonatal<br>[1.19]   | Asthma<br>[0.9]      | Skin Viral<br>[0.98] | Falls<br>[1.33]      | Conduct<br>[0.9]     | Iron<br>[2.56]       | Anxiety<br>[0.8]     | Diarrhea<br>[2.12]   | Vit A<br>[1.91]      |
| Yamagata   | Dermatitis<br>[1.31] | Neonatal<br>[0.97]   | Asthma<br>[0.91]     | Skin Viral<br>[0.98] | Diarrhea<br>[2.48]   | Falls<br>[1.4]       | Conduct<br>[0.89]    | Anxiety<br>[0.8]     | Congenital<br>[0.92] | URI<br>[1.01]        |
| Yamaguchi  | Dermatitis<br>[1.31] | Neonatal<br>[1.01]   | Asthma<br>[0.92]     | Skin Viral<br>[0.99] | Falls<br>[1.28]      | Conduct<br>[0.9]     | Diarrhea<br>[2.36]   | Anxiety<br>[0.79]    | Congenital<br>[0.87] | URI<br>[1.0]         |
| Yamanashi  | Dermatitis<br>[1.31] | Neonatal<br>[1.26]   | Asthma<br>[0.94]     | Skin Viral<br>[1.0]  | Falls<br>[1.27]      | Conduct<br>[0.9]     | Congenital<br>[1.0]  | Anxiety<br>[0.79]    | Diarrhea<br>[2.13]   | URI<br>[1.0]         |

**eFigure 9d. Leading ten causes of YLDs with the ratio of observed YLDs to YLDs expected on the basis of Socio-Demographic Index alone in 2017, 5-9 years, both sexes combined.**  
The top ten causes contributing to YLDs are listed globally, by socio-demographic quintile, and then by GBD superregion, region, country, and subnationally where modeled. For each cell, the ratio of observed YLDs to YLDs expected on the basis of socio-demographic index (SDI) alone are listed. Abbreviations: YLD=year of life lived with disability, GBD=Global Burden of Disease.

Values shown in brackets represent the ratio of observed YLDs to predicted YLDs on the basis of Socio-Demographic Index (SDI), rounded to two (2) digits. Color ranges (shown below) were calculated to place a roughly equal number of cells into each bin.

| COLOR KEY:                |                      | [0.0-0.8]            | [0.8-0.89]           | [0.89-0.97]          | [0.97-1.02]          | [1.02-1.1]           | [1.1-1.24]           | [1.24-1.42]          | [1.42-1.91]          | 1.91+                |
|---------------------------|----------------------|----------------------|----------------------|----------------------|----------------------|----------------------|----------------------|----------------------|----------------------|----------------------|
|                           | 1                    | 2                    | 3                    | 4                    | 5                    | 6                    | 7                    | 8                    | 9                    | 10                   |
| S Korea                   | Neonatal<br>[1.18]   | Dermatitis<br>[1.11] | Asthma<br>[0.9]      | Skin Viral<br>[1.01] | Anxiety<br>[0.85]    | Diarrhea<br>[2.58]   | Conduct<br>[0.82]    | Iron<br>[2.97]       | Falls<br>[1.01]      | URI<br>[0.93]        |
| Singapore                 | Neonatal<br>[1.17]   | Dermatitis<br>[1.03] | Asthma<br>[0.88]     | Skin Viral<br>[1.01] | Anxiety<br>[0.83]    | Diarrhea<br>[2.45]   | Conduct<br>[0.85]    | Falls<br>[1.06]      | Iron<br>[2.96]       | URI<br>[0.95]        |
| High-income North America | Dermatitis<br>[1.28] | Neonatal<br>[0.88]   | Asthma<br>[1.4]      | Skin Viral<br>[1.16] | Conduct<br>[1.18]    | Anxiety<br>[0.92]    | Psoriasis<br>[3.75]  | Congenital<br>[0.86] | URI<br>[0.98]        | ASD<br>[1.24]        |
| Canada                    | Dermatitis<br>[1.38] | Asthma<br>[1.59]     | Skin Viral<br>[1.28] | Neonatal<br>[0.61]   | Conduct<br>[0.97]    | Anxiety<br>[0.77]    | Psoriasis<br>[3.73]  | ASD<br>[1.51]        | URI<br>[1.03]        | Congenital<br>[0.75] |
| Greenland                 | Dermatitis<br>[1.33] | Asthma<br>[1.42]     | Neonatal<br>[0.6]    | Skin Viral<br>[1.18] | Conduct<br>[1.0]     | Anxiety<br>[0.96]    | Vit A<br>[0.85]      | URI<br>[1.13]        | Iron<br>[0.81]       | Psoriasis<br>[3.65]  |
| USA                       | Dermatitis<br>[1.27] | Neonatal<br>[0.9]    | Asthma<br>[1.37]     | Conduct<br>[1.19]    | Skin Viral<br>[1.15] | Anxiety<br>[0.94]    | Psoriasis<br>[3.76]  | Congenital<br>[0.86] | URI<br>[0.97]        | ASD<br>[1.21]        |
| Alabama                   | Dermatitis<br>[1.12] | Neonatal<br>[0.89]   | Asthma<br>[1.33]     | Skin Viral<br>[1.2]  | Conduct<br>[1.14]    | Anxiety<br>[0.96]    | Iron<br>[2.52]       | Psoriasis<br>[3.43]  | URI<br>[0.99]        | Epilepsy<br>[1.35]   |
| Alaska                    | Dermatitis<br>[1.12] | Neonatal<br>[0.85]   | Asthma<br>[1.01]     | Conduct<br>[1.16]    | Anxiety<br>[0.94]    | Skin Viral<br>[0.83] | Congenital<br>[0.93] | URI<br>[0.97]        | Psoriasis<br>[3.07]  | ASD<br>[1.14]        |
| Arizona                   | Dermatitis<br>[1.3]  | Asthma<br>[1.45]     | Neonatal<br>[0.89]   | Conduct<br>[1.15]    | Anxiety<br>[0.95]    | Skin Viral<br>[0.89] | Iron<br>[2.81]       | Congenital<br>[0.84] | Psoriasis<br>[3.42]  | URI<br>[0.98]        |
| Arkansas                  | Dermatitis<br>[1.03] | Neonatal<br>[0.78]   | Asthma<br>[0.97]     | Conduct<br>[1.14]    | Anxiety<br>[0.97]    | Skin Viral<br>[0.97] | Iron<br>[1.99]       | URI<br>[0.99]        | Congenital<br>[0.71] | ASD<br>[1.24]        |
| California                | Dermatitis<br>[1.42] | Asthma<br>[1.33]     | Neonatal<br>[0.75]   | Conduct<br>[1.18]    | Anxiety<br>[0.93]    | Skin Viral<br>[0.97] | Psoriasis<br>[3.89]  | ASD<br>[1.39]        | Congenital<br>[0.81] | URI<br>[0.97]        |
| Colorado                  | Dermatitis<br>[1.14] | Neonatal<br>[0.92]   | Asthma<br>[1.32]     | Conduct<br>[1.18]    | Anxiety<br>[0.93]    | Skin Viral<br>[0.98] | Congenital<br>[0.89] | URI<br>[0.97]        | Psoriasis<br>[2.68]  | Headaches<br>[1.0]   |
| Connecticut               | Dermatitis<br>[1.44] | Asthma<br>[1.92]     | Neonatal<br>[1.08]   | Skin Viral<br>[1.53] | Conduct<br>[1.19]    | Anxiety<br>[0.91]    | Psoriasis<br>[4.13]  | Congenital<br>[0.88] | URI<br>[0.96]        | Epilepsy<br>[1.58]   |
| Delaware                  | Dermatitis<br>[1.14] | Asthma<br>[1.55]     | Neonatal<br>[0.88]   | Skin Viral<br>[1.36] | Conduct<br>[1.17]    | Anxiety<br>[0.93]    | Psoriasis<br>[4.09]  | Congenital<br>[0.89] | URI<br>[0.97]        | Epilepsy<br>[1.62]   |
| DC                        | Dermatitis<br>[1.69] | Asthma<br>[1.53]     | Neonatal<br>[0.93]   | Skin Viral<br>[1.36] | Conduct<br>[1.17]    | Anxiety<br>[0.93]    | Psoriasis<br>[3.68]  | Congenital<br>[0.88] | URI<br>[0.95]        | ASD<br>[1.1]         |
| Florida                   | Dermatitis<br>[1.28] | Neonatal<br>[1.01]   | Asthma<br>[1.5]      | Skin Viral<br>[1.35] | Conduct<br>[1.16]    | Anxiety<br>[0.94]    | Psoriasis<br>[4.71]  | Iron<br>[2.76]       | Congenital<br>[0.84] | URI<br>[0.97]        |
| Georgia                   | Dermatitis<br>[1.39] | Asthma<br>[1.44]     | Neonatal<br>[0.83]   | Skin Viral<br>[1.19] | Conduct<br>[1.15]    | Anxiety<br>[0.95]    | Psoriasis<br>[4.18]  | URI<br>[0.98]        | Congenital<br>[0.78] | Epilepsy<br>[1.45]   |
| Hawaii                    | Dermatitis<br>[1.49] | Neonatal<br>[1.52]   | Neonatal<br>[0.82]   | Skin Viral<br>[1.37] | Conduct<br>[1.17]    | Anxiety<br>[0.94]    | Psoriasis<br>[3.86]  | Congenital<br>[0.84] | URI<br>[0.98]        | ASD<br>[1.14]        |
| Idaho                     | Dermatitis<br>[1.04] | Neonatal<br>[0.74]   | Skin Viral<br>[1.26] | Conduct<br>[1.15]    | Anxiety<br>[0.96]    | Asthma<br>[0.72]     | URI<br>[0.99]        | Congenital<br>[0.77] | Psoriasis<br>[2.82]  | ASD<br>[1.15]        |
| Illinois                  | Dermatitis<br>[1.12] | Neonatal<br>[1.06]   | Asthma<br>[1.27]     | Skin Viral<br>[1.16] | Conduct<br>[1.17]    | Anxiety<br>[0.93]    | Congenital<br>[0.93] | Psoriasis<br>[3.57]  | URI<br>[0.97]        | Epilepsy<br>[1.5]    |
| Indiana                   | Dermatitis<br>[1.09] | Neonatal<br>[0.85]   | Asthma<br>[1.28]     | Iron<br>[3.79]       | Conduct<br>[1.15]    | Anxiety<br>[0.95]    | Skin Viral<br>[1.0]  | Congenital<br>[0.94] | Psoriasis<br>[3.24]  | URI<br>[0.98]        |
| Iowa                      | Dermatitis<br>[1.0]  | Neonatal<br>[0.87]   | Skin Viral<br>[1.17] | Conduct<br>[1.17]    | Anxiety<br>[0.94]    | Asthma<br>[0.78]     | Iron<br>[3.53]       | Congenital<br>[0.84] | URI<br>[0.97]        | Psoriasis<br>[2.86]  |
| Kansas                    | Dermatitis<br>[1.06] | Neonatal<br>[0.92]   | Asthma<br>[1.33]     | Conduct<br>[1.16]    | Skin Viral<br>[1.05] | Anxiety<br>[0.94]    | URI<br>[0.97]        | Psoriasis<br>[3.14]  | Congenital<br>[0.78] | ASD<br>[1.14]        |
| Kentucky                  | Dermatitis<br>[1.12] | Neonatal<br>[0.87]   | Asthma<br>[1.32]     | Skin Viral<br>[1.21] | Conduct<br>[1.14]    | Anxiety<br>[0.97]    | Iron<br>[2.03]       | Congenital<br>[0.86] | Psoriasis<br>[3.52]  | URI<br>[0.99]        |
| Louisiana                 | Dermatitis<br>[1.2]  | Neonatal<br>[0.81]   | Skin Viral<br>[1.59] | Asthma<br>[1.04]     | Conduct<br>[1.14]    | Anxiety<br>[0.97]    | Psoriasis<br>[4.06]  | Congenital<br>[0.83] | URI<br>[0.99]        | Epilepsy<br>[1.47]   |
| Maine                     | Dermatitis<br>[0.97] | Asthma<br>[1.47]     | Neonatal<br>[0.91]   | Conduct<br>[1.17]    | Skin Viral<br>[1.05] | Anxiety<br>[0.94]    | Psoriasis<br>[3.46]  | Congenital<br>[0.86] | URI<br>[0.98]        | ASD<br>[1.15]        |
| Maryland                  | Dermatitis<br>[1.44] | Neonatal<br>[1.06]   | Asthma<br>[1.6]      | Skin Viral<br>[1.18] | Conduct<br>[1.19]    | Anxiety<br>[0.92]    | Psoriasis<br>[4.11]  | Congenital<br>[0.86] | URI<br>[0.96]        | ASD<br>[1.23]        |
| Massachusetts             | Dermatitis<br>[1.29] | Neonatal<br>[1.03]   | Asthma<br>[1.65]     | Skin Viral<br>[1.42] | Conduct<br>[1.2]     | Anxiety<br>[0.91]    | Psoriasis<br>[4.13]  | Congenital<br>[0.97] | ASD<br>[1.5]         | URI<br>[0.97]        |
| Michigan                  | Dermatitis<br>[1.13] | Asthma<br>[1.48]     | Neonatal<br>[0.89]   | Skin Viral<br>[1.36] | Conduct<br>[1.16]    | Anxiety<br>[0.94]    | Iron<br>[3.26]       | Congenital<br>[0.95] | Psoriasis<br>[3.59]  | URI<br>[0.97]        |
| Minnesota                 | Dermatitis<br>[1.0]  | Neonatal<br>[0.96]   | Asthma<br>[1.13]     | Skin Viral<br>[1.34] | Conduct<br>[1.19]    | Anxiety<br>[0.93]    | Congenital<br>[0.94] | ASD<br>[1.34]        | URI<br>[0.96]        | Psoriasis<br>[3.1]   |
| Mississippi               | Dermatitis<br>[1.02] | Neonatal<br>[0.85]   | Asthma<br>[0.89]     | Conduct<br>[1.13]    | Iron<br>[2.62]       | Anxiety<br>[0.98]    | Skin Viral<br>[0.97] | URI<br>[0.99]        | Psoriasis<br>[3.08]  | Congenital<br>[0.66] |

**eFigure 9d. Leading ten causes of YLDs with the ratio of observed YLDs to YLDs expected on the basis of Socio-Demographic Index alone in 2017, 5-9 years, both sexes combined.**  
The top ten causes contributing to YLDs are listed globally, by socio-demographic quintile, and then by GBD superregion, region, country, and subnationally where modeled. For each cell, the ratio of observed YLDs to YLDs expected on the basis of socio-demographic index (SDI) alone are listed. Abbreviations: YLD=year of life lived with disability, GBD=Global Burden of Disease.

Values shown in brackets represent the ratio of observed YLDs to predicted YLDs on the basis of Socio-Demographic Index (SDI), rounded to two (2) digits. Color ranges (shown below) were calculated to place a roughly equal number of cells into each bin.

| COLOR KEY:                    |                      | [0.0-0.8]            | [0.8-0.89]           | [0.89-0.97]          | [0.97-1.02]          | [1.02-1.1]           | [1.1-1.24]           | [1.24-1.42]          | [1.42-1.91]          | 1.91+                |
|-------------------------------|----------------------|----------------------|----------------------|----------------------|----------------------|----------------------|----------------------|----------------------|----------------------|----------------------|
|                               | 1                    | 2                    | 3                    | 4                    | 5                    | 6                    | 7                    | 8                    | 9                    | 10                   |
| Missouri                      | Dermatitis<br>[1.01] | Neonatal<br>[0.92]   | Asthma<br>[1.27]     | Conduct<br>[1.16]    | Skin Viral<br>[1.04] | Anxiety<br>[0.95]    | Congenital<br>[0.88] | URI<br>[0.98]        | Psoriasis<br>[3.22]  | ASD<br>[1.2]         |
| Montana                       | Dermatitis<br>[0.99] | Neonatal<br>[0.87]   | Skin Viral<br>[1.19] | Asthma<br>[0.93]     | Conduct<br>[1.16]    | Anxiety<br>[0.94]    | Iron<br>[2.55]       | Congenital<br>[0.8]  | URI<br>[0.96]        | Psoriasis<br>[2.85]  |
| Nebraska                      | Dermatitis<br>[1.0]  | Neonatal<br>[0.87]   | Skin Viral<br>[1.18] | Conduct<br>[1.17]    | Asthma<br>[0.88]     | Anxiety<br>[0.94]    | Congenital<br>[0.88] | URI<br>[0.97]        | Psoriasis<br>[3.01]  | ASD<br>[1.15]        |
| Nevada                        | Dermatitis<br>[1.23] | Neonatal<br>[0.84]   | Asthma<br>[1.16]     | Conduct<br>[1.15]    | Anxiety<br>[0.96]    | Skin Viral<br>[0.71] | URI<br>[0.99]        | Psoriasis<br>[2.99]  | Congenital<br>[0.7]  | ASD<br>[1.14]        |
| New Hampshire                 | Dermatitis<br>[1.01] | Neonatal<br>[0.87]   | Asthma<br>[1.41]     | Skin Viral<br>[1.2]  | Conduct<br>[1.19]    | Anxiety<br>[0.92]    | Psoriasis<br>[3.83]  | Congenital<br>[0.9]  | URI<br>[0.97]        | Iron<br>[3.13]       |
| New Jersey                    | Dermatitis<br>[1.57] | Asthma<br>[1.92]     | Neonatal<br>[0.97]   | Skin Viral<br>[1.4]  | Conduct<br>[1.19]    | Anxiety<br>[0.92]    | Psoriasis<br>[4.59]  | ASD<br>[1.65]        | Congenital<br>[1.03] | URI<br>[0.96]        |
| New Mexico                    | Dermatitis<br>[1.13] | Neonatal<br>[0.95]   | Asthma<br>[1.42]     | Conduct<br>[1.14]    | Anxiety<br>[0.97]    | Skin Viral<br>[0.72] | Congenital<br>[0.83] | URI<br>[0.99]        | Epilepsy<br>[1.28]   | ASD<br>[1.15]        |
| New York                      | Dermatitis<br>[1.62] | Asthma<br>[2.07]     | Neonatal<br>[1.01]   | Skin Viral<br>[1.45] | Conduct<br>[1.18]    | Psoriasis<br>[5.0]   | Anxiety<br>[0.92]    | Congenital<br>[1.04] | URI<br>[0.96]        | Epilepsy<br>[1.6]    |
| N Carolina                    | Dermatitis<br>[1.18] | Neonatal<br>[0.9]    | Asthma<br>[1.23]     | Skin Viral<br>[1.16] | Conduct<br>[1.06]    | Anxiety<br>[0.9]     | Psoriasis<br>[3.76]  | Congenital<br>[0.83] | URI<br>[0.98]        | ASD<br>[1.33]        |
| N Dakota                      | Dermatitis<br>[0.96] | Neonatal<br>[0.95]   | Asthma<br>[1.12]     | Skin Viral<br>[1.14] | Conduct<br>[1.18]    | Anxiety<br>[0.93]    | Congenital<br>[1.11] | URI<br>[0.97]        | Iron<br>[2.63]       | Psoriasis<br>[2.9]   |
| Ohio                          | Dermatitis<br>[1.2]  | Neonatal<br>[0.86]   | Asthma<br>[1.36]     | Conduct<br>[1.16]    | Skin Viral<br>[1.12] | Anxiety<br>[0.94]    | Congenital<br>[0.97] | Psoriasis<br>[3.44]  | URI<br>[0.98]        | Epilepsy<br>[1.54]   |
| Oklahoma                      | Dermatitis<br>[1.25] | Asthma<br>[1.41]     | Neonatal<br>[0.81]   | Conduct<br>[1.15]    | Anxiety<br>[0.96]    | Skin Viral<br>[0.94] | Congenital<br>[0.81] | Iron<br>[1.98]       | URI<br>[0.98]        | Epilepsy<br>[1.42]   |
| Oregon                        | Dermatitis<br>[1.32] | Neonatal<br>[0.78]   | Asthma<br>[1.04]     | Skin Viral<br>[1.16] | Conduct<br>[1.02]    | Anxiety<br>[0.87]    | Psoriasis<br>[3.64]  | Congenital<br>[0.85] | URI<br>[0.97]        | ASD<br>[1.14]        |
| Pennsylvania                  | Dermatitis<br>[1.24] | Asthma<br>[1.55]     | Neonatal<br>[0.9]    | Skin Viral<br>[1.2]  | Conduct<br>[1.17]    | Anxiety<br>[0.93]    | Congenital<br>[1.0]  | Psoriasis<br>[3.7]   | URI<br>[0.97]        | Iron<br>[2.72]       |
| Rhode Island                  | Dermatitis<br>[1.14] | Asthma<br>[1.55]     | Neonatal<br>[0.88]   | Skin Viral<br>[1.43] | Conduct<br>[1.18]    | Anxiety<br>[0.92]    | Psoriasis<br>[3.87]  | Congenital<br>[0.88] | URI<br>[0.97]        | ASD<br>[1.14]        |
| S Carolina                    | Dermatitis<br>[1.37] | Neonatal<br>[0.85]   | Asthma<br>[1.23]     | Iron<br>[4.38]       | Skin Viral<br>[1.19] | Conduct<br>[1.14]    | Anxiety<br>[0.96]    | Psoriasis<br>[3.97]  | Congenital<br>[0.79] | URI<br>[0.98]        |
| S Dakota                      | Dermatitis<br>[0.97] | Neonatal<br>[0.77]   | Skin Viral<br>[1.29] | Conduct<br>[1.16]    | Anxiety<br>[0.95]    | Asthma<br>[0.79]     | Iron<br>[2.43]       | Congenital<br>[0.81] | URI<br>[0.97]        | Psoriasis<br>[2.92]  |
| Tennessee                     | Dermatitis<br>[1.12] | Neonatal<br>[0.84]   | Asthma<br>[1.03]     | Conduct<br>[1.14]    | Skin Viral<br>[1.01] | Anxiety<br>[0.96]    | ASD<br>[1.49]        | Psoriasis<br>[3.39]  | URI<br>[0.99]        | Congenital<br>[0.77] |
| Texas                         | Dermatitis<br>[1.33] | Neonatal<br>[0.96]   | Asthma<br>[1.44]     | Conduct<br>[1.49]    | Anxiety<br>[0.96]    | Skin Viral<br>[1.0]  | Psoriasis<br>[3.97]  | ASD<br>[1.6]         | Congenital<br>[0.79] | URI<br>[0.98]        |
| Utah                          | Dermatitis<br>[1.06] | Neonatal<br>[0.83]   | Skin Viral<br>[1.3]  | Conduct<br>[1.15]    | Asthma<br>[0.81]     | Anxiety<br>[0.95]    | ASD<br>[1.9]         | Iron<br>[3.2]        | Congenital<br>[0.81] | URI<br>[0.98]        |
| Vermont                       | Dermatitis<br>[0.99] | Neonatal<br>[0.97]   | Asthma<br>[1.26]     | Conduct<br>[1.19]    | Anxiety<br>[0.92]    | Skin Viral<br>[1.04] | Congenital<br>[0.88] | Psoriasis<br>[3.31]  | URI<br>[0.96]        | ASD<br>[1.14]        |
| Virginia                      | Dermatitis<br>[1.45] | Neonatal<br>[0.98]   | Asthma<br>[1.43]     | Conduct<br>[1.18]    | Skin Viral<br>[1.06] | Anxiety<br>[0.93]    | Psoriasis<br>[3.75]  | URI<br>[0.96]        | Congenital<br>[0.79] | Epilepsy<br>[1.48]   |
| Washington                    | Dermatitis<br>[1.28] | Neonatal<br>[0.83]   | Asthma<br>[1.02]     | Skin Viral<br>[1.22] | Conduct<br>[1.18]    | Anxiety<br>[0.93]    | Psoriasis<br>[3.56]  | Congenital<br>[0.92] | URI<br>[0.97]        | ASD<br>[1.14]        |
| W Virginia                    | Dermatitis<br>[1.14] | Asthma<br>[1.35]     | Neonatal<br>[0.85]   | Conduct<br>[1.14]    | Anxiety<br>[0.97]    | Skin Viral<br>[0.97] | Iron<br>[2.25]       | Epilepsy<br>[1.51]   | Psoriasis<br>[3.43]  | Congenital<br>[0.77] |
| Wisconsin                     | Dermatitis<br>[1.0]  | Neonatal<br>[0.96]   | Asthma<br>[1.03]     | Skin Viral<br>[1.2]  | Conduct<br>[1.18]    | Anxiety<br>[0.93]    | Congenital<br>[0.94] | Psoriasis<br>[3.2]   | URI<br>[0.97]        | Epilepsy<br>[1.52]   |
| Wyoming                       | Dermatitis<br>[1.05] | Neonatal<br>[0.73]   | Asthma<br>[1.0]      | Conduct<br>[1.17]    | Anxiety<br>[0.94]    | Skin Viral<br>[0.91] | Congenital<br>[0.87] | URI<br>[0.97]        | ASD<br>[1.13]        | Headaches<br>[0.99]  |
| <b>Southern Latin America</b> | Neonatal<br>[0.95]   | Dermatitis<br>[1.0]  | Asthma<br>[0.98]     | Anxiety<br>[1.37]    | Diarrhea<br>[1.97]   | Skin Viral<br>[0.99] | Conduct<br>[0.92]    | Congenital<br>[0.73] | Iron<br>[0.5]        | URI<br>[0.89]        |
| Argentina                     | Neonatal<br>[0.94]   | Dermatitis<br>[0.94] | Asthma<br>[0.96]     | Anxiety<br>[1.38]    | Diarrhea<br>[1.94]   | Skin Viral<br>[0.99] | Conduct<br>[0.93]    | Iron<br>[0.54]       | Congenital<br>[0.74] | URI<br>[0.89]        |
| Chile                         | Dermatitis<br>[1.19] | Neonatal<br>[1.0]    | Asthma<br>[1.02]     | Anxiety<br>[1.32]    | Diarrhea<br>[2.24]   | Skin Viral<br>[0.99] | Conduct<br>[0.89]    | Congenital<br>[0.72] | Epilepsy<br>[1.15]   | Vit A<br>[0.62]      |
| Uruguay                       | Neonatal<br>[1.0]    | Dermatitis<br>[0.93] | Asthma<br>[1.11]     | Anxiety<br>[1.39]    | Skin Viral<br>[0.99] | Conduct<br>[0.93]    | Iron<br>[0.6]        | Congenital<br>[0.69] | Vit A<br>[0.52]      | Diarrhea<br>[0.98]   |
| <b>Western Europe</b>         | Dermatitis<br>[1.08] | Neonatal<br>[0.81]   | Anxiety<br>[1.29]    | Asthma<br>[0.83]     | Skin Viral<br>[0.95] | Conduct<br>[0.95]    | Congenital<br>[1.03] | URI<br>[1.27]        | Falls<br>[0.92]      | Headaches<br>[0.96]  |

**eFigure 9d. Leading ten causes of YLDs with the ratio of observed YLDs to YLDs expected on the basis of Socio-Demographic Index alone in 2017, 5-9 years, both sexes combined.**  
The top ten causes contributing to YLDs are listed globally, by socio-demographic quintile, and then by GBD superregion, region, country, and subnationally where modeled. For each cell, the ratio of observed YLDs to YLDs expected on the basis of socio-demographic index (SDI) alone are listed. Abbreviations: YLD=year of life lived with disability, GBD=Global Burden of Disease.

Values shown in brackets represent the ratio of observed YLDs to predicted YLDs on the basis of Socio-Demographic Index (SDI), rounded to two (2) digits. Color ranges (shown below) were calculated to place a roughly equal number of cells into each bin.

| COLOR KEY:           |                      | [0.0-0.8]            | [0.8-0.89]           | [0.89-0.97]          | [0.97-1.02]          | [1.02-1.1]           | [1.1-1.24]           | [1.24-1.42]          | [1.42-1.91]          | 1.91+               |
|----------------------|----------------------|----------------------|----------------------|----------------------|----------------------|----------------------|----------------------|----------------------|----------------------|---------------------|
|                      | 1                    | 2                    | 3                    | 4                    | 5                    | 6                    | 7                    | 8                    | 9                    | 10                  |
| Andorra              | Dermatitis<br>[1.48] | Neonatal<br>[0.86]   | Anxiety<br>[1.22]    | Asthma<br>[1.0]      | Skin Viral<br>[0.99] | Conduct<br>[0.96]    | URI<br>[1.24]        | Congenital<br>[1.07] | Falls<br>[0.83]      | Headaches<br>[1.03] |
| Austria              | Neonatal<br>[1.34]   | Dermatitis<br>[0.75] | Anxiety<br>[1.24]    | Skin Viral<br>[0.96] | Asthma<br>[0.75]     | Conduct<br>[0.95]    | Congenital<br>[1.05] | URI<br>[1.26]        | Falls<br>[0.93]      | Headaches<br>[1.01] |
| Belgium              | Dermatitis<br>[0.91] | Anxiety<br>[1.19]    | Neonatal<br>[0.56]   | Skin Viral<br>[0.98] | Conduct<br>[0.96]    | URI<br>[1.24]        | Asthma<br>[0.7]      | Congenital<br>[1.0]  | Falls<br>[1.02]      | Headaches<br>[1.28] |
| Cyprus               | Neonatal<br>[1.07]   | Dermatitis<br>[0.77] | Anxiety<br>[1.23]    | Asthma<br>[0.77]     | Skin Viral<br>[0.96] | Conduct<br>[0.95]    | URI<br>[1.26]        | Congenital<br>[0.98] | Falls<br>[0.9]       | Headaches<br>[0.99] |
| Denmark              | Dermatitis<br>[1.26] | Anxiety<br>[1.2]     | Neonatal<br>[0.69]   | Skin Viral<br>[1.15] | Asthma<br>[0.93]     | Iron<br>[5.37]       | Congenital<br>[1.16] | URI<br>[1.22]        | Conduct<br>[0.9]     | Falls<br>[0.79]     |
| Finland              | Neonatal<br>[1.68]   | Dermatitis<br>[1.32] | Asthma<br>[0.91]     | Anxiety<br>[0.9]     | Skin Viral<br>[1.01] | Conduct<br>[0.93]    | Congenital<br>[1.08] | URI<br>[1.23]        | Falls<br>[0.96]      | Headaches<br>[1.02] |
| France               | Dermatitis<br>[1.2]  | Anxiety<br>[1.46]    | Neonatal<br>[0.65]   | Asthma<br>[0.78]     | Skin Viral<br>[0.96] | Conduct<br>[0.94]    | URI<br>[1.26]        | Congenital<br>[1.01] | Falls<br>[0.93]      | Epilepsy<br>[1.17]  |
| Germany              | Neonatal<br>[0.93]   | Dermatitis<br>[0.91] | Anxiety<br>[1.45]    | Skin Viral<br>[0.98] | Conduct<br>[0.95]    | URI<br>[1.25]        | Congenital<br>[1.02] | Epilepsy<br>[2.05]   | Asthma<br>[0.57]     | Falls<br>[0.91]     |
| Greece               | Neonatal<br>[0.84]   | Anxiety<br>[1.39]    | Dermatitis<br>[0.64] | Skin Viral<br>[0.94] | Asthma<br>[0.69]     | Conduct<br>[0.92]    | URI<br>[1.31]        | Congenital<br>[0.97] | Headaches<br>[1.16]  | Falls<br>[1.03]     |
| Iceland              | Dermatitis<br>[1.38] | Neonatal<br>[0.87]   | Asthma<br>[1.4]      | Anxiety<br>[1.21]    | Skin Viral<br>[1.09] | Conduct<br>[0.97]    | URI<br>[1.23]        | Congenital<br>[0.98] | Falls<br>[0.82]      | Headaches<br>[1.03] |
| Ireland              | Dermatitis<br>[1.12] | Anxiety<br>[1.33]    | Asthma<br>[1.18]     | Neonatal<br>[0.72]   | Skin Viral<br>[0.97] | Congenital<br>[1.14] | Conduct<br>[0.95]    | URI<br>[1.24]        | Falls<br>[0.92]      | Headaches<br>[1.01] |
| Israel               | Dermatitis<br>[1.0]  | Neonatal<br>[0.92]   | Blindness<br>[2.66]  | Asthma<br>[0.73]     | Skin Viral<br>[0.91] | Conduct<br>[0.92]    | Congenital<br>[1.0]  | URI<br>[1.29]        | Anxiety<br>[0.81]    | Falls<br>[1.07]     |
| Italy                | Dermatitis<br>[0.91] | Anxiety<br>[1.32]    | Neonatal<br>[0.64]   | Skin Viral<br>[0.95] | Conduct<br>[0.94]    | URI<br>[1.27]        | Congenital<br>[0.98] | Headaches<br>[1.21]  | Asthma<br>[0.42]     | Falls<br>[0.79]     |
| Luxembourg           | Dermatitis<br>[1.48] | Neonatal<br>[1.13]   | Anxiety<br>[1.2]     | Asthma<br>[1.11]     | Skin Viral<br>[1.0]  | Conduct<br>[0.98]    | URI<br>[1.23]        | Congenital<br>[1.05] | Falls<br>[0.79]      | Headaches<br>[1.16] |
| Malta                | Dermatitis<br>[0.79] | Neonatal<br>[0.71]   | Anxiety<br>[1.27]    | Asthma<br>[0.83]     | Congenital<br>[1.19] | Skin Viral<br>[0.94] | Conduct<br>[0.93]    | URI<br>[1.27]        | Falls<br>[1.21]      | Iron<br>[1.96]      |
| Netherlands          | Dermatitis<br>[1.18] | Neonatal<br>[0.87]   | Anxiety<br>[1.43]    | Asthma<br>[0.92]     | Conduct<br>[1.09]    | Skin Viral<br>[0.92] | URI<br>[1.23]        | Congenital<br>[1.08] | Headaches<br>[1.14]  | Falls<br>[0.7]      |
| Norway               | Dermatitis<br>[1.33] | Neonatal<br>[1.04]   | Anxiety<br>[1.6]     | Asthma<br>[1.36]     | Congenital<br>[1.48] | Skin Viral<br>[1.07] | Conduct<br>[0.98]    | URI<br>[1.24]        | Falls<br>[1.05]      | Headaches<br>[1.04] |
| Portugal             | Dermatitis<br>[0.86] | Asthma<br>[1.15]     | Anxiety<br>[1.34]    | Neonatal<br>[0.59]   | Conduct<br>[0.92]    | Skin Viral<br>[0.84] | Vit A<br>[1.25]      | URI<br>[1.32]        | Congenital<br>[0.81] | Iron<br>[0.96]      |
| Spain                | Neonatal<br>[0.68]   | Dermatitis<br>[0.67] | Anxiety<br>[1.21]    | Skin Viral<br>[0.92] | Conduct<br>[0.93]    | Asthma<br>[0.68]     | URI<br>[1.29]        | Congenital<br>[0.93] | Iron<br>[1.91]       | Headaches<br>[1.18] |
| Sweden               | Dermatitis<br>[1.69] | Asthma<br>[1.26]     | Neonatal<br>[0.76]   | Anxiety<br>[1.19]    | Skin Viral<br>[1.07] | Congenital<br>[1.2]  | Conduct<br>[0.98]    | URI<br>[1.25]        | Falls<br>[1.09]      | ASD<br>[1.1]        |
| Stockholm            | Dermatitis<br>[1.35] | Neonatal<br>[0.75]   | Asthma<br>[1.18]     | Anxiety<br>[1.17]    | Skin Viral<br>[1.1]  | Congenital<br>[1.25] | Conduct<br>[0.99]    | URI<br>[1.23]        | Falls<br>[1.01]      | ASD<br>[1.38]       |
| Sweden w/o Stockholm | Dermatitis<br>[1.79] | Asthma<br>[1.28]     | Neonatal<br>[0.77]   | Anxiety<br>[1.2]     | Skin Viral<br>[1.06] | Congenital<br>[1.18] | Conduct<br>[0.97]    | URI<br>[1.26]        | Falls<br>[1.12]      | Headaches<br>[0.96] |
| Switzerland          | Dermatitis<br>[1.47] | Neonatal<br>[0.83]   | Anxiety<br>[1.22]    | Asthma<br>[0.9]      | Skin Viral<br>[0.98] | Conduct<br>[0.96]    | URI<br>[1.24]        | Congenital<br>[1.04] | Falls<br>[0.66]      | ASD<br>[1.02]       |
| UK                   | Dermatitis<br>[1.43] | Neonatal<br>[0.97]   | Asthma<br>[1.38]     | Iron<br>[4.12]       | Anxiety<br>[1.08]    | Congenital<br>[1.15] | Conduct<br>[0.98]    | Skin Viral<br>[0.89] | URI<br>[1.28]        | Falls<br>[0.99]     |
| England              | Dermatitis<br>[1.46] | Neonatal<br>[0.99]   | Asthma<br>[1.41]     | Iron<br>[4.26]       | Anxiety<br>[1.05]    | Congenital<br>[1.15] | Conduct<br>[0.98]    | Skin Viral<br>[0.88] | URI<br>[1.27]        | Falls<br>[0.97]     |
| E Midlands           | Dermatitis<br>[1.44] | Neonatal<br>[0.94]   | Asthma<br>[1.3]      | Iron<br>[3.51]       | Anxiety<br>[1.07]    | Congenital<br>[1.19] | Conduct<br>[0.97]    | Skin Viral<br>[0.87] | URI<br>[1.29]        | Falls<br>[1.04]     |
| Derby                | Dermatitis<br>[1.43] | Neonatal<br>[0.95]   | Asthma<br>[1.33]     | Iron<br>[3.85]       | Anxiety<br>[1.05]    | Congenital<br>[1.2]  | Conduct<br>[0.98]    | Skin Viral<br>[0.88] | URI<br>[1.27]        | Falls<br>[0.99]     |
| Derbyshire           | Dermatitis<br>[1.44] | Neonatal<br>[0.86]   | Asthma<br>[1.27]     | Iron<br>[3.92]       | Anxiety<br>[1.08]    | Congenital<br>[1.17] | Conduct<br>[0.97]    | Skin Viral<br>[0.87] | URI<br>[1.31]        | Falls<br>[1.09]     |
| Leicester            | Dermatitis<br>[1.44] | Asthma<br>[1.34]     | Neonatal<br>[0.81]   | Anxiety<br>[1.06]    | Congenital<br>[1.2]  | Conduct<br>[0.98]    | Iron<br>[2.84]       | Skin Viral<br>[0.88] | URI<br>[1.27]        | Falls<br>[1.01]     |
| Leicestershire       | Dermatitis<br>[1.44] | Asthma<br>[1.32]     | Neonatal<br>[0.79]   | Iron<br>[4.19]       | Anxiety<br>[1.05]    | Congenital<br>[1.21] | Conduct<br>[0.98]    | Skin Viral<br>[0.88] | URI<br>[1.28]        | Falls<br>[0.99]     |
| Lincolnshire         | Dermatitis<br>[1.44] | Neonatal<br>[0.92]   | Asthma<br>[1.27]     | Iron<br>[2.98]       | Anxiety<br>[1.09]    | Congenital<br>[1.16] | Conduct<br>[0.96]    | Skin Viral<br>[0.87] | URI<br>[1.31]        | Falls<br>[1.1]      |

**eFigure 9d. Leading ten causes of YLDs with the ratio of observed YLDs to YLDs expected on the basis of Socio-Demographic Index alone in 2017, 5-9 years, both sexes combined.**  
The top ten causes contributing to YLDs are listed globally, by socio-demographic quintile, and then by GBD superregion, region, country, and subnationally where modeled. For each cell, the ratio of observed YLDs to YLDs expected on the basis of socio-demographic index (SDI) alone are listed. Abbreviations: YLD=year of life lived with disability, GBD=Global Burden of Disease.

Values shown in brackets represent the ratio of observed YLDs to predicted YLDs on the basis of Socio-Demographic Index (SDI), rounded to two (2) digits. Color ranges (shown below) were calculated to place a roughly equal number of cells into each bin.

| COLOR KEY:           |                      | [0.0-0.8]          | [0.8-0.89]         | [0.89-0.97]        | [0.97-1.02]       | [1.02-1.1]           | [1.1-1.24]           | [1.24-1.42]          | [1.42-1.91]     | 1.91+           |
|----------------------|----------------------|--------------------|--------------------|--------------------|-------------------|----------------------|----------------------|----------------------|-----------------|-----------------|
|                      | 1                    | 2                  | 3                  | 4                  | 5                 | 6                    | 7                    | 8                    | 9               | 10              |
| Northamptonshire     | Dermatitis<br>[1.44] | Neonatal<br>[1.03] | Asthma<br>[1.3]    | Iron<br>[3.52]     | Anxiety<br>[1.07] | Congenital<br>[1.19] | Conduct<br>[0.97]    | Skin Viral<br>[0.87] | URI<br>[1.29]   | Falls<br>[1.03] |
| Nottingham           | Dermatitis<br>[1.44] | Neonatal<br>[1.15] | Asthma<br>[1.4]    | Anxiety<br>[1.03]  | Iron<br>[3.96]    | Congenital<br>[1.22] | Conduct<br>[1.0]     | Skin Viral<br>[0.89] | URI<br>[1.26]   | Falls<br>[0.93] |
| Nottinghamshire      | Dermatitis<br>[1.44] | Neonatal<br>[1.03] | Asthma<br>[1.28]   | Anxiety<br>[1.08]  | Iron<br>[2.48]    | Congenital<br>[1.18] | Conduct<br>[0.97]    | Skin Viral<br>[0.87] | URI<br>[1.31]   | Falls<br>[1.09] |
| Rutland              | Dermatitis<br>[1.44] | Asthma<br>[1.3]    | Iron<br>[3.92]     | Neonatal<br>[0.66] | Anxiety<br>[1.07] | Congenital<br>[1.18] | Conduct<br>[0.97]    | Skin Viral<br>[0.88] | URI<br>[1.3]    | Falls<br>[1.03] |
| E England            | Dermatitis<br>[1.44] | Neonatal<br>[0.9]  | Asthma<br>[1.32]   | Anxiety<br>[1.06]  | Iron<br>[2.97]    | Conduct<br>[0.98]    | Congenital<br>[1.08] | Skin Viral<br>[0.88] | URI<br>[1.29]   | Falls<br>[1.01] |
| Bedford              | Dermatitis<br>[1.44] | Neonatal<br>[1.1]  | Asthma<br>[1.32]   | Iron<br>[3.44]     | Anxiety<br>[1.06] | Conduct<br>[0.98]    | Congenital<br>[1.08] | Skin Viral<br>[0.88] | URI<br>[1.27]   | Falls<br>[0.99] |
| Cambridgeshire       | Dermatitis<br>[1.43] | Neonatal<br>[0.92] | Asthma<br>[1.39]   | Anxiety<br>[1.03]  | Conduct<br>[1.0]  | Congenital<br>[1.12] | Skin Viral<br>[0.89] | URI<br>[1.27]        | ASD<br>[1.65]   | Iron<br>[2.92]  |
| Cen Bedfordshire     | Dermatitis<br>[1.44] | Neonatal<br>[0.98] | Asthma<br>[1.3]    | Anxiety<br>[1.07]  | Conduct<br>[0.97] | Congenital<br>[1.05] | Skin Viral<br>[0.88] | Iron<br>[2.51]       | URI<br>[1.29]   | Falls<br>[1.02] |
| Essex                | Dermatitis<br>[1.44] | Neonatal<br>[0.89] | Asthma<br>[1.3]    | Anxiety<br>[1.08]  | Conduct<br>[0.97] | Congenital<br>[1.08] | Skin Viral<br>[0.88] | URI<br>[1.3]         | Iron<br>[2.3]   | Falls<br>[1.04] |
| Hertfordshire        | Dermatitis<br>[1.43] | Neonatal<br>[0.89] | Asthma<br>[1.39]   | Anxiety<br>[1.03]  | Conduct<br>[1.0]  | Iron<br>[3.54]       | Congenital<br>[1.09] | Skin Viral<br>[0.89] | URI<br>[1.28]   | Falls<br>[0.92] |
| Luton                | Dermatitis<br>[1.43] | Neonatal<br>[1.02] | Asthma<br>[1.33]   | Anxiety<br>[1.06]  | Conduct<br>[0.99] | Congenital<br>[1.09] | Skin Viral<br>[0.87] | URI<br>[1.28]        | Iron<br>[2.29]  | Falls<br>[1.03] |
| Norfolk              | Dermatitis<br>[1.44] | Asthma<br>[1.29]   | Neonatal<br>[0.76] | Iron<br>[2.99]     | Anxiety<br>[1.07] | Conduct<br>[0.98]    | Congenital<br>[1.07] | Skin Viral<br>[0.87] | URI<br>[1.3]    | Falls<br>[1.05] |
| Peterborough         | Dermatitis<br>[1.44] | Asthma<br>[1.32]   | Neonatal<br>[0.71] | Iron<br>[2.94]     | Anxiety<br>[1.07] | Conduct<br>[0.98]    | Congenital<br>[1.06] | Skin Viral<br>[0.87] | URI<br>[1.29]   | Falls<br>[1.07] |
| Southend-on-Sea      | Dermatitis<br>[1.44] | Neonatal<br>[1.06] | Asthma<br>[1.28]   | Iron<br>[2.78]     | Anxiety<br>[1.09] | Conduct<br>[0.97]    | Congenital<br>[1.06] | Skin Viral<br>[0.87] | URI<br>[1.31]   | Falls<br>[1.1]  |
| Suffolk              | Dermatitis<br>[1.44] | Neonatal<br>[0.94] | Asthma<br>[1.29]   | Iron<br>[3.15]     | Anxiety<br>[1.07] | Conduct<br>[0.97]    | Congenital<br>[1.06] | Skin Viral<br>[0.87] | URI<br>[1.31]   | Falls<br>[1.07] |
| Thurrock             | Dermatitis<br>[1.45] | Neonatal<br>[0.99] | Asthma<br>[1.29]   | Iron<br>[2.41]     | Anxiety<br>[1.1]  | Conduct<br>[0.96]    | Congenital<br>[1.05] | Skin Viral<br>[0.87] | URI<br>[1.32]   | Falls<br>[1.12] |
| Greater London       | Dermatitis<br>[1.46] | Asthma<br>[1.72]   | Neonatal<br>[1.05] | Iron<br>[6.32]     | Anxiety<br>[1.02] | Conduct<br>[1.01]    | Congenital<br>[1.15] | Skin Viral<br>[0.91] | URI<br>[1.24]   | Falls<br>[0.85] |
| Barking & Dagenham   | Dermatitis<br>[1.87] | Iron<br>[4.98]     | Neonatal<br>[0.98] | Asthma<br>[1.49]   | Anxiety<br>[1.09] | Conduct<br>[0.97]    | Congenital<br>[1.05] | Skin Viral<br>[0.86] | URI<br>[1.31]   | Falls<br>[1.14] |
| Barnet               | Dermatitis<br>[1.43] | Asthma<br>[1.63]   | Neonatal<br>[0.97] | Iron<br>[5.0]      | Anxiety<br>[1.04] | Conduct<br>[0.99]    | Congenital<br>[1.08] | Skin Viral<br>[0.89] | URI<br>[1.27]   | Falls<br>[0.92] |
| Bexley               | Dermatitis<br>[1.43] | Asthma<br>[1.54]   | Neonatal<br>[0.92] | Iron<br>[4.25]     | Anxiety<br>[1.07] | Conduct<br>[0.97]    | Congenital<br>[1.06] | Skin Viral<br>[0.87] | URI<br>[1.3]    | Falls<br>[1.05] |
| Brent                | Dermatitis<br>[1.43] | Neonatal<br>[1.03] | Asthma<br>[1.6]    | Iron<br>[5.4]      | Anxiety<br>[1.04] | Conduct<br>[0.99]    | Congenital<br>[1.06] | Skin Viral<br>[0.88] | URI<br>[1.26]   | Falls<br>[0.95] |
| Bromley              | Dermatitis<br>[1.44] | Neonatal<br>[1.1]  | Asthma<br>[1.59]   | Anxiety<br>[1.05]  | Conduct<br>[0.98] | Congenital<br>[1.1]  | Skin Viral<br>[0.89] | URI<br>[1.29]        | Falls<br>[0.97] | Iron<br>[2.14]  |
| Camden               | Dermatitis<br>[1.46] | Asthma<br>[1.85]   | Neonatal<br>[0.92] | Anxiety<br>[1.0]   | Iron<br>[6.63]    | Conduct<br>[1.04]    | Congenital<br>[1.19] | Skin Viral<br>[0.94] | URI<br>[1.23]   | Falls<br>[0.78] |
| Croydon              | Dermatitis<br>[1.44] | Asthma<br>[1.56]   | Neonatal<br>[0.98] | Iron<br>[4.66]     | Anxiety<br>[1.06] | Conduct<br>[0.97]    | Congenital<br>[1.08] | Skin Viral<br>[0.88] | URI<br>[1.29]   | Falls<br>[1.01] |
| Ealing               | Dermatitis<br>[1.43] | Neonatal<br>[1.11] | Asthma<br>[1.64]   | Iron<br>[6.63]     | Anxiety<br>[1.04] | Conduct<br>[0.99]    | Congenital<br>[1.08] | Skin Viral<br>[0.89] | URI<br>[1.26]   | Falls<br>[0.92] |
| Enfield              | Dermatitis<br>[1.44] | Neonatal<br>[1.03] | Asthma<br>[1.57]   | Iron<br>[4.61]     | Anxiety<br>[1.06] | Conduct<br>[0.98]    | Congenital<br>[1.08] | Skin Viral<br>[0.88] | URI<br>[1.28]   | Falls<br>[1.0]  |
| Greenwich            | Dermatitis<br>[1.43] | Asthma<br>[1.55]   | Neonatal<br>[0.95] | Iron<br>[3.76]     | Anxiety<br>[1.06] | Conduct<br>[0.98]    | Congenital<br>[1.09] | Skin Viral<br>[0.87] | URI<br>[1.28]   | Falls<br>[1.0]  |
| Hackney              | Dermatitis<br>[1.45] | Asthma<br>[1.76]   | Neonatal<br>[1.02] | Anxiety<br>[1.03]  | Iron<br>[4.28]    | Conduct<br>[0.99]    | Congenital<br>[1.14] | Skin Viral<br>[0.91] | URI<br>[1.24]   | Falls<br>[0.87] |
| Hammersmith & Fulham | Dermatitis<br>[1.46] | Asthma<br>[1.83]   | Neonatal<br>[1.03] | Anxiety<br>[1.01]  | Conduct<br>[1.03] | Congenital<br>[1.18] | Skin Viral<br>[0.94] | URI<br>[1.23]        | Falls<br>[0.78] | Iron<br>[3.1]   |
| Haringey             | Dermatitis<br>[1.44] | Neonatal<br>[1.08] | Asthma<br>[1.6]    | Iron<br>[4.5]      | Anxiety<br>[1.05] | Conduct<br>[0.98]    | Congenital<br>[1.11] | Skin Viral<br>[0.89] | URI<br>[1.25]   | Falls<br>[0.93] |
| Harrow               | Dermatitis<br>[1.44] | Neonatal<br>[1.12] | Asthma<br>[1.58]   | Iron<br>[5.13]     | Anxiety<br>[1.05] | Conduct<br>[0.98]    | Congenital<br>[1.1]  | Skin Viral<br>[0.89] | URI<br>[1.28]   | Falls<br>[0.96] |

**eFigure 9d. Leading ten causes of YLDs with the ratio of observed YLDs to YLDs expected on the basis of Socio-Demographic Index alone in 2017, 5-9 years, both sexes combined.**  
The top ten causes contributing to YLDs are listed globally, by socio-demographic quintile, and then by GBD superregion, region, country, and subnationally where modeled. For each cell, the ratio of observed YLDs to YLDs expected on the basis of socio-demographic index (SDI) alone are listed. Abbreviations: YLD=year of life lived with disability, GBD=Global Burden of Disease.

Values shown in brackets represent the ratio of observed YLDs to predicted YLDs on the basis of Socio-Demographic Index (SDI), rounded to two (2) digits. Color ranges (shown below) were calculated to place a roughly equal number of cells into each bin.

| COLOR KEY:           |                      | [0.0-0.8]          | [0.8-0.89]         | [0.89-0.97]        | [0.97-1.02]          | [1.02-1.1]           | [1.1-1.24]           | [1.24-1.42]          | [1.42-1.91]    | 1.91+           |
|----------------------|----------------------|--------------------|--------------------|--------------------|----------------------|----------------------|----------------------|----------------------|----------------|-----------------|
|                      | 1                    | 2                  | 3                  | 4                  | 5                    | 6                    | 7                    | 8                    | 9              | 10              |
| Havering             | Dermatitis<br>[1.44] | Asthma<br>[1.54]   | Neonatal<br>[0.97] | Iron<br>[3.14]     | Anxiety<br>[1.07]    | Conduct<br>[0.97]    | Congenital<br>[1.07] | Skin Viral<br>[0.87] | URI<br>[1.3]   | Falls<br>[1.06] |
| Hillingdon           | Dermatitis<br>[1.44] | Neonatal<br>[1.15] | Asthma<br>[1.71]   | Iron<br>[5.48]     | Anxiety<br>[1.03]    | Conduct<br>[1.0]     | Congenital<br>[1.12] | Skin Viral<br>[0.9]  | URI<br>[1.24]  | Falls<br>[0.88] |
| Hounslow             | Dermatitis<br>[1.44] | Neonatal<br>[1.09] | Asthma<br>[1.68]   | Iron<br>[5.0]      | Anxiety<br>[1.03]    | Conduct<br>[1.0]     | Congenital<br>[1.11] | Skin Viral<br>[0.9]  | URI<br>[1.24]  | Falls<br>[0.89] |
| Islington            | Dermatitis<br>[1.45] | Asthma<br>[1.83]   | Neonatal<br>[0.89] | Anxiety<br>[1.01]  | Conduct<br>[1.03]    | Congenital<br>[1.19] | Skin Viral<br>[0.94] | URI<br>[1.22]        | Iron<br>[4.37] | Falls<br>[0.8]  |
| Kensington & Chelsea | Dermatitis<br>[1.45] | Asthma<br>[1.85]   | Neonatal<br>[0.89] | Iron<br>[8.37]     | Anxiety<br>[0.99]    | Conduct<br>[1.05]    | Congenital<br>[1.18] | Skin Viral<br>[0.94] | URI<br>[1.23]  | Falls<br>[0.78] |
| Kingston upon Thames | Dermatitis<br>[1.44] | Neonatal<br>[1.09] | Asthma<br>[1.71]   | Anxiety<br>[1.02]  | Conduct<br>[1.0]     | Congenital<br>[1.16] | Iron<br>[4.1]        | Skin Viral<br>[0.91] | URI<br>[1.26]  | Falls<br>[0.86] |
| Lambeth              | Dermatitis<br>[1.44] | Asthma<br>[1.73]   | Iron<br>[7.47]     | Neonatal<br>[0.75] | Anxiety<br>[1.02]    | Conduct<br>[1.01]    | Congenital<br>[1.17] | Skin Viral<br>[0.92] | URI<br>[1.23]  | Falls<br>[0.83] |
| Lewisham             | Dermatitis<br>[1.43] | Neonatal<br>[1.18] | Asthma<br>[1.58]   | Iron<br>[3.96]     | Anxiety<br>[1.06]    | Conduct<br>[0.98]    | Congenital<br>[1.1]  | Skin Viral<br>[0.88] | URI<br>[1.28]  | Falls<br>[0.97] |
| Merton               | Dermatitis<br>[1.43] | Neonatal<br>[1.04] | Asthma<br>[1.67]   | Iron<br>[5.71]     | Anxiety<br>[1.03]    | Conduct<br>[0.99]    | Congenital<br>[1.12] | Skin Viral<br>[0.9]  | URI<br>[1.26]  | Falls<br>[0.89] |
| Newham               | Dermatitis<br>[1.44] | Neonatal<br>[1.06] | Asthma<br>[1.58]   | Anxiety<br>[1.06]  | Iron<br>[3.29]       | Conduct<br>[0.98]    | Congenital<br>[1.08] | Skin Viral<br>[0.88] | URI<br>[1.27]  | Falls<br>[0.98] |
| Redbridge            | Dermatitis<br>[1.44] | Asthma<br>[1.55]   | Neonatal<br>[0.98] | Iron<br>[4.4]      | Anxiety<br>[1.06]    | Congenital<br>[1.15] | Conduct<br>[0.98]    | Skin Viral<br>[0.87] | URI<br>[1.29]  | Falls<br>[1.03] |
| Richmond upon Thames | Dermatitis<br>[1.44] | Neonatal<br>[1.15] | Asthma<br>[1.73]   | Iron<br>[6.01]     | Anxiety<br>[1.02]    | Conduct<br>[1.01]    | Congenital<br>[1.17] | Skin Viral<br>[0.91] | URI<br>[1.25]  | Falls<br>[0.84] |
| Southwark            | Dermatitis<br>[1.45] | Asthma<br>[1.79]   | Neonatal<br>[0.77] | Anxiety<br>[1.01]  | Iron<br>[5.39]       | Conduct<br>[1.02]    | Congenital<br>[1.19] | Skin Viral<br>[0.92] | URI<br>[1.23]  | Falls<br>[0.83] |
| Sutton               | Dermatitis<br>[1.43] | Neonatal<br>[1.25] | Asthma<br>[1.59]   | Iron<br>[4.31]     | Anxiety<br>[1.05]    | Conduct<br>[0.98]    | Congenital<br>[1.09] | Skin Viral<br>[0.88] | URI<br>[1.28]  | Falls<br>[0.99] |
| Tower Hamlets        | Dermatitis<br>[1.45] | Neonatal<br>[1.13] | Asthma<br>[1.79]   | Anxiety<br>[1.01]  | Iron<br>[5.16]       | Conduct<br>[1.01]    | Congenital<br>[1.17] | Skin Viral<br>[0.92] | URI<br>[1.23]  | Falls<br>[0.83] |
| Waltham Forest       | Dermatitis<br>[1.44] | Neonatal<br>[0.99] | Asthma<br>[1.51]   | Iron<br>[4.15]     | Anxiety<br>[1.07]    | Conduct<br>[0.97]    | Congenital<br>[1.08] | Skin Viral<br>[0.87] | URI<br>[1.28]  | Falls<br>[1.05] |
| Wandsworth           | Dermatitis<br>[1.45] | Asthma<br>[1.75]   | Neonatal<br>[0.92] | Anxiety<br>[1.01]  | Iron<br>[5.41]       | Conduct<br>[1.02]    | Congenital<br>[1.19] | Skin Viral<br>[0.93] | URI<br>[1.24]  | Falls<br>[0.81] |
| Westminster          | Dermatitis<br>[1.46] | Asthma<br>[1.87]   | Neonatal<br>[0.83] | Iron<br>[6.92]     | Anxiety<br>[1.0]     | Conduct<br>[1.04]    | Congenital<br>[1.18] | Skin Viral<br>[0.94] | URI<br>[1.22]  | Falls<br>[0.79] |
| NE England           | Dermatitis<br>[1.55] | Iron<br>[4.59]     | Neonatal<br>[0.88] | Asthma<br>[1.3]    | Congenital<br>[1.35] | Anxiety<br>[1.07]    | Conduct<br>[0.97]    | Skin Viral<br>[0.87] | URI<br>[1.3]   | Falls<br>[1.06] |
| County Durham        | Dermatitis<br>[1.72] | Iron<br>[4.73]     | Neonatal<br>[0.95] | Asthma<br>[1.3]    | Congenital<br>[1.34] | Anxiety<br>[1.09]    | Conduct<br>[0.96]    | Skin Viral<br>[0.87] | URI<br>[1.31]  | Falls<br>[1.1]  |
| Darlington           | Dermatitis<br>[1.43] | Iron<br>[5.15]     | Neonatal<br>[0.86] | Asthma<br>[1.33]   | Congenital<br>[1.36] | Anxiety<br>[1.06]    | Conduct<br>[0.98]    | Skin Viral<br>[0.87] | URI<br>[1.3]   | Falls<br>[1.04] |
| Gateshead            | Dermatitis<br>[1.69] | Iron<br>[5.85]     | Neonatal<br>[0.98] | Asthma<br>[1.32]   | Congenital<br>[1.36] | Anxiety<br>[1.07]    | Conduct<br>[0.96]    | Skin Viral<br>[0.87] | URI<br>[1.29]  | Falls<br>[1.05] |
| Hartlepool           | Dermatitis<br>[1.45] | Neonatal<br>[1.0]  | Asthma<br>[1.29]   | Iron<br>[2.77]     | Congenital<br>[1.33] | Anxiety<br>[1.1]     | Conduct<br>[0.97]    | Skin Viral<br>[0.86] | URI<br>[1.32]  | Falls<br>[1.14] |
| Middlesbrough        | Dermatitis<br>[1.44] | Asthma<br>[1.31]   | Neonatal<br>[0.77] | Iron<br>[3.06]     | Congenital<br>[1.35] | Anxiety<br>[1.09]    | Conduct<br>[0.97]    | Skin Viral<br>[0.87] | URI<br>[1.3]   | Falls<br>[1.09] |
| Newcastle upon Tyne  | Dermatitis<br>[1.43] | Asthma<br>[1.43]   | Neonatal<br>[0.84] | Iron<br>[5.02]     | Congenital<br>[1.42] | Anxiety<br>[1.03]    | Conduct<br>[1.0]     | Skin Viral<br>[0.89] | URI<br>[1.26]  | Falls<br>[0.91] |
| N Tyneside           | Dermatitis<br>[1.43] | Iron<br>[4.64]     | Asthma<br>[1.32]   | Neonatal<br>[0.82] | Congenital<br>[1.36] | Anxiety<br>[1.07]    | Conduct<br>[0.98]    | Skin Viral<br>[0.87] | URI<br>[1.29]  | Falls<br>[1.06] |
| Northumberland       | Dermatitis<br>[1.44] | Neonatal<br>[0.85] | Asthma<br>[1.3]    | Iron<br>[3.64]     | Congenital<br>[1.36] | Anxiety<br>[1.08]    | Conduct<br>[0.98]    | Skin Viral<br>[0.86] | URI<br>[1.31]  | Falls<br>[1.11] |
| Redcar & Cleveland   | Dermatitis<br>[1.45] | Iron<br>[3.71]     | Asthma<br>[1.28]   | Neonatal<br>[0.8]  | Congenital<br>[1.33] | Anxiety<br>[1.1]     | Conduct<br>[0.98]    | Skin Viral<br>[0.86] | URI<br>[1.33]  | Falls<br>[1.18] |
| S Tyneside           | Dermatitis<br>[1.73] | Iron<br>[3.29]     | Neonatal<br>[0.84] | Asthma<br>[1.27]   | Congenital<br>[1.33] | Anxiety<br>[1.1]     | Conduct<br>[0.96]    | Skin Viral<br>[0.87] | URI<br>[1.33]  | Falls<br>[1.16] |
| Stockton-on-Tees     | Dermatitis<br>[1.44] | Neonatal<br>[1.07] | Iron<br>[4.7]      | Asthma<br>[1.34]   | Congenital<br>[1.35] | Anxiety<br>[1.08]    | Conduct<br>[0.97]    | Skin Viral<br>[0.87] | URI<br>[1.29]  | Falls<br>[1.05] |
| Sunderland           | Dermatitis<br>[1.71] | Iron<br>[4.99]     | Neonatal<br>[0.75] | Asthma<br>[1.15]   | Congenital<br>[1.35] | Anxiety<br>[1.08]    | Conduct<br>[0.97]    | Skin Viral<br>[0.87] | URI<br>[1.3]   | Falls<br>[1.08] |

**eFigure 9d. Leading ten causes of YLDs with the ratio of observed YLDs to YLDs expected on the basis of Socio-Demographic Index alone in 2017, 5-9 years, both sexes combined.**  
The top ten causes contributing to YLDs are listed globally, by socio-demographic quintile, and then by GBD superregion, region, country, and subnationally where modeled. For each cell, the ratio of observed YLDs to YLDs expected on the basis of socio-demographic index (SDI) alone are listed. Abbreviations: YLD=year of life lived with disability, GBD=Global Burden of Disease.

Values shown in brackets represent the ratio of observed YLDs to predicted YLDs on the basis of Socio-Demographic Index (SDI), rounded to two (2) digits. Color ranges (shown below) were calculated to place a roughly equal number of cells into each bin.

| COLOR KEY:            |                      | [0.0-0.8]          | [0.8-0.89]         | [0.89-0.97]          | [0.97-1.02]          | [1.02-1.1]           | [1.1-1.24]           | [1.24-1.42]          | [1.42-1.91]     | 1.91+              |
|-----------------------|----------------------|--------------------|--------------------|----------------------|----------------------|----------------------|----------------------|----------------------|-----------------|--------------------|
|                       | 1                    | 2                  | 3                  | 4                    | 5                    | 6                    | 7                    | 8                    | 9               | 10                 |
| NW England            | Dermatitis<br>[1.44] | Neonatal<br>[1.09] | Asthma<br>[1.34]   | Iron<br>[3.3]        | Anxiety<br>[1.06]    | Congenital<br>[1.29] | Conduct<br>[0.98]    | Skin Viral<br>[0.88] | URI<br>[1.28]   | Falls<br>[1.02]    |
| Blackburn with Darwen | Dermatitis<br>[1.45] | Neonatal<br>[1.07] | Asthma<br>[1.29]   | Iron<br>[2.41]       | Anxiety<br>[1.1]     | Congenital<br>[1.21] | Conduct<br>[0.97]    | Skin Viral<br>[0.87] | URI<br>[1.3]    | Falls<br>[1.13]    |
| Blackpool             | Dermatitis<br>[1.46] | Neonatal<br>[1.03] | Asthma<br>[1.28]   | Iron<br>[2.14]       | Anxiety<br>[1.12]    | Congenital<br>[1.21] | Conduct<br>[0.97]    | Skin Viral<br>[0.87] | URI<br>[1.33]   | Falls<br>[1.24]    |
| Bolton                | Dermatitis<br>[1.44] | Neonatal<br>[1.02] | Asthma<br>[1.28]   | Iron<br>[2.58]       | Anxiety<br>[1.09]    | Congenital<br>[1.22] | Conduct<br>[0.97]    | Skin Viral<br>[0.87] | URI<br>[1.3]    | Falls<br>[1.11]    |
| Bury                  | Dermatitis<br>[1.44] | Neonatal<br>[0.98] | Asthma<br>[1.29]   | Iron<br>[3.34]       | Anxiety<br>[1.07]    | Congenital<br>[1.24] | Conduct<br>[0.98]    | Skin Viral<br>[0.87] | URI<br>[1.29]   | Falls<br>[1.08]    |
| Cheshire E            | Dermatitis<br>[1.43] | Neonatal<br>[1.35] | Asthma<br>[1.41]   | Congenital<br>[1.42] | Anxiety<br>[1.03]    | Conduct<br>[1.0]     | Skin Viral<br>[0.89] | URI<br>[1.27]        | Iron<br>[3.15]  | Falls<br>[0.93]    |
| Cheshire W & Chester  | Dermatitis<br>[1.44] | Neonatal<br>[1.11] | Asthma<br>[1.37]   | Congenital<br>[1.41] | Anxiety<br>[1.05]    | Iron<br>[3.29]       | Conduct<br>[0.99]    | Skin Viral<br>[0.89] | URI<br>[1.27]   | Falls<br>[0.96]    |
| Cumbria               | Dermatitis<br>[1.43] | Neonatal<br>[1.08] | Asthma<br>[1.32]   | Iron<br>[3.23]       | Anxiety<br>[1.07]    | Congenital<br>[1.24] | Conduct<br>[0.97]    | Skin Viral<br>[0.87] | URI<br>[1.3]    | Falls<br>[1.04]    |
| Halton                | Dermatitis<br>[1.44] | Neonatal<br>[1.11] | Asthma<br>[1.33]   | Iron<br>[3.56]       | Anxiety<br>[1.08]    | Congenital<br>[1.23] | Conduct<br>[0.97]    | Skin Viral<br>[0.87] | URI<br>[1.28]   | Falls<br>[1.04]    |
| Knowsley              | Dermatitis<br>[1.44] | Neonatal<br>[1.05] | Asthma<br>[1.31]   | Iron<br>[3.6]        | Congenital<br>[1.35] | Anxiety<br>[1.08]    | Conduct<br>[0.97]    | Skin Viral<br>[0.87] | URI<br>[1.29]   | Falls<br>[1.08]    |
| Lancashire            | Dermatitis<br>[1.43] | Neonatal<br>[1.05] | Asthma<br>[1.32]   | Iron<br>[3.21]       | Anxiety<br>[1.07]    | Congenital<br>[1.24] | Conduct<br>[0.98]    | Skin Viral<br>[0.87] | URI<br>[1.29]   | Falls<br>[1.04]    |
| Liverpool             | Dermatitis<br>[1.44] | Neonatal<br>[1.19] | Asthma<br>[1.36]   | Congenital<br>[1.42] | Anxiety<br>[0.97]    | Conduct<br>[0.98]    | Skin Viral<br>[0.88] | URI<br>[1.27]        | Iron<br>[2.39]  | Falls<br>[0.98]    |
| Manchester            | Dermatitis<br>[1.44] | Neonatal<br>[1.2]  | Asthma<br>[1.47]   | Anxiety<br>[1.02]    | Congenital<br>[1.32] | Conduct<br>[1.0]     | Skin Viral<br>[0.91] | URI<br>[1.24]        | Iron<br>[3.07]  | Falls<br>[0.88]    |
| Oldham                | Dermatitis<br>[1.45] | Asthma<br>[1.31]   | Neonatal<br>[0.8]  | Iron<br>[2.06]       | Anxiety<br>[1.12]    | Congenital<br>[1.22] | Conduct<br>[0.96]    | Skin Viral<br>[0.87] | URI<br>[1.32]   | Falls<br>[1.18]    |
| Rochdale              | Dermatitis<br>[1.44] | Iron<br>[3.26]     | Asthma<br>[1.29]   | Neonatal<br>[0.83]   | Anxiety<br>[1.1]     | Congenital<br>[1.21] | Conduct<br>[0.97]    | Skin Viral<br>[0.86] | URI<br>[1.32]   | Falls<br>[1.15]    |
| Salford               | Dermatitis<br>[1.44] | Neonatal<br>[1.22] | Asthma<br>[1.36]   | Anxiety<br>[1.06]    | Congenital<br>[1.26] | Conduct<br>[0.98]    | Skin Viral<br>[0.88] | URI<br>[1.27]        | Iron<br>[2.18]  | Falls<br>[1.0]     |
| Sefton                | Dermatitis<br>[1.44] | Neonatal<br>[1.08] | Asthma<br>[1.29]   | Iron<br>[3.1]        | Congenital<br>[1.36] | Anxiety<br>[1.08]    | Conduct<br>[0.97]    | Skin Viral<br>[0.86] | URI<br>[1.31]   | Falls<br>[1.12]    |
| St Helens             | Dermatitis<br>[1.44] | Neonatal<br>[1.09] | Asthma<br>[1.28]   | Iron<br>[2.86]       | Congenital<br>[1.34] | Anxiety<br>[1.09]    | Conduct<br>[0.96]    | Skin Viral<br>[0.87] | URI<br>[1.31]   | Falls<br>[1.12]    |
| Stockport             | Dermatitis<br>[1.43] | Neonatal<br>[0.92] | Asthma<br>[1.34]   | Iron<br>[3.93]       | Anxiety<br>[1.05]    | Congenital<br>[1.28] | Conduct<br>[0.99]    | Skin Viral<br>[0.88] | URI<br>[1.29]   | Falls<br>[1.0]     |
| Tameside              | Dermatitis<br>[1.44] | Neonatal<br>[0.89] | Asthma<br>[1.28]   | Iron<br>[2.32]       | Anxiety<br>[1.1]     | Congenital<br>[1.21] | Conduct<br>[0.97]    | Skin Viral<br>[0.87] | URI<br>[1.32]   | Falls<br>[1.15]    |
| Trafford              | Dermatitis<br>[1.44] | Neonatal<br>[1.21] | Asthma<br>[1.42]   | Iron<br>[4.83]       | Anxiety<br>[1.03]    | Congenital<br>[1.29] | Conduct<br>[1.0]     | Skin Viral<br>[0.9]  | URI<br>[1.25]   | Falls<br>[0.9]     |
| Warrington            | Dermatitis<br>[1.43] | Neonatal<br>[1.28] | Asthma<br>[1.39]   | Iron<br>[5.78]       | Anxiety<br>[1.04]    | Congenital<br>[1.28] | Conduct<br>[0.99]    | Skin Viral<br>[0.89] | URI<br>[1.26]   | Falls<br>[0.94]    |
| Wigan                 | Dermatitis<br>[1.44] | Neonatal<br>[1.08] | Asthma<br>[1.28]   | Iron<br>[2.34]       | Anxiety<br>[1.09]    | Congenital<br>[1.22] | Conduct<br>[0.97]    | Skin Viral<br>[0.86] | URI<br>[1.33]   | Falls<br>[1.14]    |
| Wirral                | Dermatitis<br>[1.44] | Neonatal<br>[1.21] | Asthma<br>[1.28]   | Congenital<br>[1.36] | Anxiety<br>[1.09]    | Iron<br>[1.98]       | Conduct<br>[0.97]    | Skin Viral<br>[0.87] | URI<br>[1.31]   | Falls<br>[1.11]    |
| SE England            | Dermatitis<br>[1.57] | Neonatal<br>[1.02] | Asthma<br>[1.47]   | Anxiety<br>[1.05]    | Iron<br>[3.57]       | Congenital<br>[1.16] | Conduct<br>[0.99]    | Skin Viral<br>[0.89] | URI<br>[1.28]   | Falls<br>[0.96]    |
| Bracknell Forest      | Dermatitis<br>[1.43] | Asthma<br>[1.37]   | Neonatal<br>[0.8]  | Anxiety<br>[1.04]    | Congenital<br>[1.17] | Conduct<br>[1.0]     | Skin Viral<br>[0.9]  | URI<br>[1.27]        | Falls<br>[0.92] | Iron<br>[2.17]     |
| Brighton & Hove       | Dermatitis<br>[1.7]  | Neonatal<br>[1.12] | Asthma<br>[1.41]   | Iron<br>[5.15]       | Anxiety<br>[1.03]    | Congenital<br>[1.21] | Conduct<br>[1.0]     | Skin Viral<br>[0.91] | URI<br>[1.24]   | Falls<br>[0.88]    |
| Buckinghamshire       | Dermatitis<br>[1.43] | Neonatal<br>[1.15] | Asthma<br>[1.34]   | Anxiety<br>[1.04]    | Iron<br>[3.68]       | Congenital<br>[1.17] | Conduct<br>[0.99]    | Skin Viral<br>[0.89] | URI<br>[1.27]   | Epilepsy<br>[1.74] |
| E Sussex              | Dermatitis<br>[1.67] | Neonatal<br>[1.06] | Asthma<br>[1.22]   | Iron<br>[2.83]       | Anxiety<br>[1.08]    | Congenital<br>[1.13] | Conduct<br>[0.98]    | Skin Viral<br>[0.86] | URI<br>[1.31]   | Falls<br>[1.08]    |
| Hampshire             | Dermatitis<br>[1.43] | Asthma<br>[2.08]   | Neonatal<br>[0.99] | Iron<br>[3.84]       | Anxiety<br>[1.05]    | Congenital<br>[1.15] | Conduct<br>[0.98]    | Skin Viral<br>[0.88] | URI<br>[1.29]   | Falls<br>[0.98]    |
| Isle of Wight         | Dermatitis<br>[1.41] | Asthma<br>[1.98]   | Neonatal<br>[0.92] | Iron<br>[3.33]       | Anxiety<br>[1.08]    | Congenital<br>[1.1]  | Conduct<br>[0.97]    | Skin Viral<br>[0.87] | URI<br>[1.3]    | Falls<br>[1.08]    |

**eFigure 9d. Leading ten causes of YLDs with the ratio of observed YLDs to YLDs expected on the basis of Socio-Demographic Index alone in 2017, 5-9 years, both sexes combined.**  
The top ten causes contributing to YLDs are listed globally, by socio-demographic quintile, and then by GBD superregion, region, country, and subnationally where modeled. For each cell, the ratio of observed YLDs to YLDs expected on the basis of socio-demographic index (SDI) alone are listed. Abbreviations: YLD=year of life lived with disability, GBD=Global Burden of Disease.

Values shown in brackets represent the ratio of observed YLDs to predicted YLDs on the basis of Socio-Demographic Index (SDI), rounded to two (2) digits. Color ranges (shown below) were calculated to place a roughly equal number of cells into each bin.

| COLOR KEY:           |                      | [0.0-0.8]          | [0.8-0.89]         | [0.89-0.97]        | [0.97-1.02]          | [1.02-1.1]           | [1.1-1.24]           | [1.24-1.42]          | [1.42-1.91]     | 1.91+           |
|----------------------|----------------------|--------------------|--------------------|--------------------|----------------------|----------------------|----------------------|----------------------|-----------------|-----------------|
|                      | 1                    | 2                  | 3                  | 4                  | 5                    | 6                    | 7                    | 8                    | 9               | 10              |
| Kent                 | Dermatitis<br>[1.67] | Neonatal<br>[0.98] | Asthma<br>[1.26]   | Anxiety<br>[1.07]  | Iron<br>[2.67]       | Congenital<br>[1.13] | Conduct<br>[0.98]    | Skin Viral<br>[0.87] | URI<br>[1.3]    | ASD<br>[1.55]   |
| Medway               | Dermatitis<br>[1.44] | Neonatal<br>[1.03] | Asthma<br>[1.25]   | Iron<br>[2.98]     | Anxiety<br>[1.09]    | Congenital<br>[1.1]  | Conduct<br>[0.96]    | Skin Viral<br>[0.87] | URI<br>[1.31]   | Falls<br>[1.1]  |
| Milton Keynes        | Dermatitis<br>[1.43] | Neonatal<br>[0.88] | Asthma<br>[1.37]   | Anxiety<br>[1.04]  | Congenital<br>[1.16] | Conduct<br>[0.99]    | Skin Viral<br>[0.89] | URI<br>[1.26]        | Iron<br>[2.87]  | Falls<br>[0.96] |
| Oxfordshire          | Dermatitis<br>[1.87] | Neonatal<br>[0.94] | Asthma<br>[1.39]   | Iron<br>[5.55]     | Anxiety<br>[1.03]    | Congenital<br>[1.18] | Conduct<br>[0.99]    | Skin Viral<br>[0.9]  | URI<br>[1.26]   | Falls<br>[0.89] |
| Portsmouth           | Dermatitis<br>[1.44] | Neonatal<br>[0.97] | Asthma<br>[1.34]   | Iron<br>[4.95]     | Anxiety<br>[1.05]    | Conduct<br>[0.99]    | Congenital<br>[1.13] | Skin Viral<br>[0.89] | URI<br>[1.26]   | Falls<br>[0.95] |
| Reading              | Dermatitis<br>[1.87] | Neonatal<br>[1.22] | Asthma<br>[1.46]   | Anxiety<br>[1.02]  | Congenital<br>[1.21] | Conduct<br>[1.01]    | Skin Viral<br>[0.91] | URI<br>[1.23]        | Iron<br>[3.78]  | Falls<br>[0.85] |
| Slough               | Dermatitis<br>[1.43] | Neonatal<br>[1.06] | Asthma<br>[1.4]    | Anxiety<br>[1.05]  | Congenital<br>[1.15] | Conduct<br>[0.99]    | Skin Viral<br>[0.89] | URI<br>[1.26]        | Iron<br>[2.41]  | Falls<br>[0.94] |
| Southampton          | Dermatitis<br>[1.43] | Neonatal<br>[0.96] | Asthma<br>[1.34]   | Iron<br>[4.07]     | Anxiety<br>[1.04]    | Congenital<br>[1.15] | Conduct<br>[0.99]    | Skin Viral<br>[0.89] | URI<br>[1.27]   | Falls<br>[0.94] |
| Surrey               | Dermatitis<br>[1.66] | Neonatal<br>[1.11] | Asthma<br>[1.4]    | Anxiety<br>[1.02]  | Congenital<br>[1.2]  | Conduct<br>[1.0]     | Skin Viral<br>[0.91] | URI<br>[1.26]        | Falls<br>[0.88] | Iron<br>[2.81]  |
| West Berkshire       | Dermatitis<br>[1.43] | Neonatal<br>[0.93] | Asthma<br>[1.38]   | Anxiety<br>[1.04]  | Congenital<br>[1.17] | Iron<br>[3.72]       | Conduct<br>[1.0]     | Skin Viral<br>[0.89] | URI<br>[1.26]   | Falls<br>[0.93] |
| W Sussex             | Dermatitis<br>[1.48] | Neonatal<br>[1.02] | Asthma<br>[1.52]   | Iron<br>[4.18]     | Anxiety<br>[1.05]    | Congenital<br>[1.15] | Conduct<br>[0.99]    | Skin Viral<br>[0.88] | URI<br>[1.29]   | Falls<br>[0.99] |
| Windsor & Maidenhead | Dermatitis<br>[1.44] | Neonatal<br>[0.97] | Asthma<br>[1.43]   | Anxiety<br>[1.02]  | Congenital<br>[1.21] | Conduct<br>[1.02]    | Skin Viral<br>[0.9]  | URI<br>[1.25]        | Iron<br>[3.45]  | Falls<br>[0.87] |
| Wokingham            | Dermatitis<br>[1.44] | Neonatal<br>[1.0]  | Asthma<br>[1.4]    | Anxiety<br>[1.02]  | Iron<br>[4.25]       | Congenital<br>[1.21] | Conduct<br>[1.01]    | Skin Viral<br>[0.91] | URI<br>[1.27]   | Falls<br>[0.89] |
| SW England           | Dermatitis<br>[1.43] | Neonatal<br>[1.05] | Iron<br>[5.7]      | Asthma<br>[1.3]    | Anxiety<br>[1.06]    | Conduct<br>[0.98]    | Skin Viral<br>[0.88] | Congenital<br>[1.03] | URI<br>[1.29]   | Falls<br>[1.0]  |
| Bath & NE Somerset   | Dermatitis<br>[1.43] | Neonatal<br>[1.41] | Iron<br>[8.02]     | Asthma<br>[1.37]   | Anxiety<br>[1.03]    | Conduct<br>[1.0]     | Skin Viral<br>[0.89] | Congenital<br>[1.06] | URI<br>[1.26]   | Falls<br>[0.9]  |
| Bournemouth          | Dermatitis<br>[1.44] | Iron<br>[7.82]     | Neonatal<br>[1.04] | Asthma<br>[1.34]   | Anxiety<br>[1.05]    | Conduct<br>[0.98]    | Skin Viral<br>[0.89] | Congenital<br>[1.05] | URI<br>[1.27]   | Falls<br>[0.94] |
| Bristol              | Dermatitis<br>[1.44] | Neonatal<br>[1.22] | Iron<br>[8.25]     | Asthma<br>[1.42]   | Anxiety<br>[1.03]    | Conduct<br>[1.0]     | Skin Viral<br>[0.9]  | Congenital<br>[1.08] | URI<br>[1.25]   | Falls<br>[0.87] |
| Cornwall             | Dermatitis<br>[1.44] | Iron<br>[6.67]     | Neonatal<br>[1.03] | Asthma<br>[1.26]   | Anxiety<br>[1.08]    | Conduct<br>[0.97]    | Congenital<br>[1.02] | Skin Viral<br>[0.87] | URI<br>[1.3]    | Falls<br>[1.09] |
| Devon                | Dermatitis<br>[1.43] | Neonatal<br>[0.95] | Asthma<br>[1.28]   | Iron<br>[4.2]      | Anxiety<br>[1.06]    | Conduct<br>[0.98]    | Skin Viral<br>[0.87] | Congenital<br>[1.03] | URI<br>[1.29]   | Falls<br>[1.03] |
| Dorset               | Dermatitis<br>[1.44] | Iron<br>[5.78]     | Neonatal<br>[1.01] | Asthma<br>[1.28]   | Anxiety<br>[1.07]    | Conduct<br>[0.97]    | Skin Viral<br>[0.87] | Congenital<br>[1.02] | URI<br>[1.29]   | Falls<br>[1.05] |
| Gloucestershire      | Dermatitis<br>[1.43] | Neonatal<br>[0.97] | Asthma<br>[1.33]   | Iron<br>[3.94]     | Anxiety<br>[1.06]    | Conduct<br>[0.98]    | Skin Viral<br>[0.88] | Congenital<br>[1.04] | URI<br>[1.28]   | Falls<br>[0.97] |
| N Somerset           | Dermatitis<br>[1.43] | Neonatal<br>[1.13] | Iron<br>[6.29]     | Asthma<br>[1.29]   | Anxiety<br>[1.06]    | Conduct<br>[0.98]    | Congenital<br>[1.03] | Skin Viral<br>[0.87] | URI<br>[1.29]   | Falls<br>[1.02] |
| Plymouth             | Dermatitis<br>[1.44] | Neonatal<br>[1.04] | Asthma<br>[1.29]   | Iron<br>[4.17]     | Anxiety<br>[1.06]    | Conduct<br>[0.97]    | Skin Viral<br>[0.88] | Congenital<br>[1.02] | URI<br>[1.28]   | Falls<br>[1.01] |
| Poole                | Dermatitis<br>[1.43] | Neonatal<br>[1.03] | Iron<br>[5.41]     | Asthma<br>[1.31]   | Anxiety<br>[1.05]    | Conduct<br>[0.99]    | Skin Viral<br>[0.87] | Congenital<br>[1.03] | URI<br>[1.29]   | Falls<br>[1.0]  |
| Somerset             | Dermatitis<br>[1.44] | Neonatal<br>[1.09] | Asthma<br>[1.26]   | Anxiety<br>[1.09]  | Iron<br>[2.52]       | Conduct<br>[0.97]    | Skin Viral<br>[0.87] | Congenital<br>[1.02] | URI<br>[1.31]   | Falls<br>[1.09] |
| S Gloucestershire    | Dermatitis<br>[1.44] | Neonatal<br>[1.1]  | Asthma<br>[1.36]   | Iron<br>[5.57]     | Anxiety<br>[1.04]    | Conduct<br>[0.99]    | Skin Viral<br>[0.89] | Congenital<br>[1.05] | URI<br>[1.27]   | Falls<br>[0.92] |
| Swindon              | Dermatitis<br>[1.43] | Iron<br>[8.33]     | Asthma<br>[1.34]   | Neonatal<br>[0.75] | Anxiety<br>[1.05]    | Conduct<br>[0.98]    | Skin Viral<br>[0.88] | Congenital<br>[1.02] | URI<br>[1.27]   | Falls<br>[0.98] |
| Torbay               | Dermatitis<br>[1.45] | Neonatal<br>[0.85] | Iron<br>[2.96]     | Asthma<br>[1.24]   | Anxiety<br>[1.11]    | Conduct<br>[0.97]    | Skin Viral<br>[0.87] | Congenital<br>[1.0]  | URI<br>[1.34]   | Falls<br>[1.19] |
| Wiltshire            | Dermatitis<br>[1.43] | Iron<br>[7.49]     | Neonatal<br>[1.2]  | Asthma<br>[1.28]   | Anxiety<br>[1.07]    | Conduct<br>[0.97]    | Skin Viral<br>[0.87] | Congenital<br>[1.02] | URI<br>[1.29]   | Falls<br>[1.03] |
| W Midlands           | Dermatitis<br>[1.44] | Neonatal<br>[0.98] | Asthma<br>[1.3]    | Iron<br>[3.62]     | Anxiety<br>[1.07]    | Conduct<br>[0.98]    | Congenital<br>[1.1]  | Skin Viral<br>[0.87] | URI<br>[1.29]   | Falls<br>[1.06] |
| Birmingham           | Dermatitis<br>[1.44] | Neonatal<br>[0.96] | Asthma<br>[1.32]   | Iron<br>[3.55]     | Anxiety<br>[1.06]    | Conduct<br>[0.98]    | Congenital<br>[1.12] | Skin Viral<br>[0.88] | URI<br>[1.28]   | Falls<br>[1.04] |

**eFigure 9d. Leading ten causes of YLDs with the ratio of observed YLDs to YLDs expected on the basis of Socio-Demographic Index alone in 2017, 5-9 years, both sexes combined.**  
The top ten causes contributing to YLDs are listed globally, by socio-demographic quintile, and then by GBD superregion, region, country, and subnationally where modeled. For each cell, the ratio of observed YLDs to YLDs expected on the basis of socio-demographic index (SDI) alone are listed. Abbreviations: YLD=year of life lived with disability, GBD=Global Burden of Disease.

Values shown in brackets represent the ratio of observed YLDs to predicted YLDs on the basis of Socio-Demographic Index (SDI), rounded to two (2) digits. Color ranges (shown below) were calculated to place a roughly equal number of cells into each bin.

| COLOR KEY:            |                      | [0.0-0.8]          | [0.8-0.89]         | [0.89-0.97]        | [0.97-1.02]          | [1.02-1.1]           | [1.1-1.24]           | [1.24-1.42]          | [1.42-1.91]     | 1.91+               |
|-----------------------|----------------------|--------------------|--------------------|--------------------|----------------------|----------------------|----------------------|----------------------|-----------------|---------------------|
|                       | 1                    | 2                  | 3                  | 4                  | 5                    | 6                    | 7                    | 8                    | 9               | 10                  |
| Coventry              | Dermatitis<br>[1.44] | Neonatal<br>[0.93] | Asthma<br>[1.35]   | Anxiety<br>[1.05]  | Iron<br>[3.23]       | Conduct<br>[0.98]    | Congenital<br>[1.12] | Skin Viral<br>[0.88] | URI<br>[1.26]   | Falls<br>[0.97]     |
| Dudley                | Dermatitis<br>[1.45] | Neonatal<br>[1.07] | Asthma<br>[1.27]   | Iron<br>[2.44]     | Anxiety<br>[1.1]     | Congenital<br>[1.08] | Conduct<br>[0.96]    | Skin Viral<br>[0.87] | URI<br>[1.31]   | Falls<br>[1.15]     |
| Herefordshire         | Dermatitis<br>[1.43] | Neonatal<br>[1.01] | Asthma<br>[1.3]    | Iron<br>[3.93]     | Anxiety<br>[1.07]    | Conduct<br>[0.98]    | Congenital<br>[1.1]  | Skin Viral<br>[0.87] | URI<br>[1.29]   | Falls<br>[1.03]     |
| Sandwell              | Dermatitis<br>[1.45] | Neonatal<br>[1.06] | Asthma<br>[1.28]   | Iron<br>[2.69]     | Anxiety<br>[1.1]     | Conduct<br>[0.97]    | Congenital<br>[1.07] | Skin Viral<br>[0.86] | URI<br>[1.31]   | Falls<br>[1.18]     |
| Shropshire            | Dermatitis<br>[1.44] | Neonatal<br>[0.98] | Asthma<br>[1.29]   | Anxiety<br>[1.07]  | Iron<br>[2.82]       | Conduct<br>[0.97]    | Congenital<br>[1.1]  | Skin Viral<br>[0.87] | URI<br>[1.29]   | Falls<br>[1.03]     |
| Solihull              | Dermatitis<br>[1.43] | Asthma<br>[1.35]   | Neonatal<br>[0.72] | Iron<br>[3.96]     | Anxiety<br>[1.05]    | Conduct<br>[0.99]    | Congenital<br>[1.12] | Skin Viral<br>[0.89] | URI<br>[1.27]   | Falls<br>[0.98]     |
| Staffordshire         | Dermatitis<br>[1.44] | Neonatal<br>[0.95] | Iron<br>[4.87]     | Asthma<br>[1.28]   | Anxiety<br>[1.07]    | Conduct<br>[0.98]    | Congenital<br>[1.1]  | Skin Viral<br>[0.87] | URI<br>[1.3]    | Falls<br>[1.09]     |
| Stoke-on-Trent        | Dermatitis<br>[1.45] | Neonatal<br>[1.17] | Asthma<br>[1.26]   | Iron<br>[2.63]     | Anxiety<br>[1.09]    | Conduct<br>[0.96]    | Congenital<br>[1.08] | Skin Viral<br>[0.87] | URI<br>[1.3]    | Falls<br>[1.18]     |
| Telford & Wrekin      | Dermatitis<br>[1.44] | Neonatal<br>[0.99] | Asthma<br>[1.29]   | Anxiety<br>[1.08]  | Iron<br>[2.59]       | Conduct<br>[0.96]    | Congenital<br>[1.08] | Skin Viral<br>[0.87] | URI<br>[1.29]   | Falls<br>[1.07]     |
| Walsall               | Dermatitis<br>[1.45] | Neonatal<br>[0.98] | Asthma<br>[1.27]   | Iron<br>[2.26]     | Anxiety<br>[1.1]     | Conduct<br>[0.97]    | Congenital<br>[1.07] | Skin Viral<br>[0.86] | URI<br>[1.32]   | Falls<br>[1.2]      |
| Warwickshire          | Dermatitis<br>[1.44] | Neonatal<br>[1.0]  | Asthma<br>[1.35]   | Iron<br>[4.97]     | Anxiety<br>[1.05]    | Conduct<br>[0.99]    | Congenital<br>[1.13] | Skin Viral<br>[0.89] | URI<br>[1.28]   | Falls<br>[0.97]     |
| Wolverhampton         | Dermatitis<br>[1.44] | Asthma<br>[1.27]   | Neonatal<br>[0.72] | Iron<br>[2.44]     | Anxiety<br>[1.09]    | Conduct<br>[0.97]    | Congenital<br>[1.08] | Skin Viral<br>[0.87] | URI<br>[1.3]    | Falls<br>[1.11]     |
| Worcestershire        | Dermatitis<br>[1.44] | Neonatal<br>[1.1]  | Asthma<br>[1.3]    | Iron<br>[3.6]      | Anxiety<br>[1.07]    | Conduct<br>[0.98]    | Congenital<br>[1.11] | Skin Viral<br>[0.88] | URI<br>[1.29]   | Falls<br>[1.04]     |
| Yorkshire & Humber    | Dermatitis<br>[1.44] | Neonatal<br>[0.92] | Asthma<br>[1.33]   | Iron<br>[3.62]     | Anxiety<br>[1.07]    | Conduct<br>[0.97]    | Congenital<br>[1.1]  | Skin Viral<br>[0.87] | URI<br>[1.29]   | Falls<br>[1.03]     |
| Barnsley              | Dermatitis<br>[1.45] | Neonatal<br>[0.97] | Asthma<br>[1.28]   | Iron<br>[2.31]     | Anxiety<br>[1.12]    | Conduct<br>[0.97]    | Congenital<br>[1.06] | Skin Viral<br>[0.87] | URI<br>[1.34]   | Falls<br>[1.19]     |
| Bradford              | Dermatitis<br>[1.44] | Neonatal<br>[1.02] | Asthma<br>[1.29]   | Iron<br>[2.89]     | Anxiety<br>[1.1]     | Conduct<br>[0.97]    | Congenital<br>[1.09] | Skin Viral<br>[0.87] | URI<br>[1.3]    | Falls<br>[1.11]     |
| Calderdale            | Dermatitis<br>[1.44] | Neonatal<br>[0.89] | Asthma<br>[1.32]   | Anxiety<br>[1.08]  | Conduct<br>[0.96]    | Congenital<br>[1.09] | Skin Viral<br>[0.88] | URI<br>[1.29]        | Iron<br>[2.18]  | Falls<br>[1.04]     |
| Doncaster             | Dermatitis<br>[1.45] | Neonatal<br>[1.19] | Asthma<br>[1.29]   | Anxiety<br>[1.11]  | Iron<br>[1.8]        | Congenital<br>[1.08] | Conduct<br>[0.96]    | Skin Viral<br>[0.87] | URI<br>[1.33]   | Falls<br>[1.18]     |
| E Riding of Yorkshire | Dermatitis<br>[1.44] | Neonatal<br>[0.91] | Asthma<br>[1.3]    | Iron<br>[3.21]     | Anxiety<br>[1.08]    | Conduct<br>[0.98]    | Congenital<br>[1.1]  | Skin Viral<br>[0.87] | URI<br>[1.3]    | Falls<br>[1.07]     |
| Kingston upon Hull    | Dermatitis<br>[1.44] | Asthma<br>[1.33]   | Neonatal<br>[0.84] | Anxiety<br>[1.08]  | Conduct<br>[0.97]    | Congenital<br>[1.09] | Iron<br>[2.16]       | Skin Viral<br>[0.87] | URI<br>[1.3]    | Falls<br>[1.08]     |
| Kirklees              | Dermatitis<br>[1.44] | Neonatal<br>[0.86] | Asthma<br>[1.3]    | Iron<br>[3.18]     | Anxiety<br>[1.08]    | Congenital<br>[1.1]  | Conduct<br>[0.97]    | Skin Viral<br>[0.87] | URI<br>[1.29]   | Falls<br>[1.08]     |
| Leeds                 | Dermatitis<br>[1.43] | Asthma<br>[1.41]   | Neonatal<br>[0.84] | Iron<br>[5.7]      | Anxiety<br>[1.03]    | Congenital<br>[1.15] | Conduct<br>[0.99]    | Skin Viral<br>[0.9]  | URI<br>[1.26]   | Falls<br>[0.91]     |
| NE Lincolnshire       | Dermatitis<br>[1.44] | Neonatal<br>[0.88] | Asthma<br>[1.31]   | Iron<br>[3.3]      | Anxiety<br>[1.1]     | Conduct<br>[0.97]    | Congenital<br>[1.08] | Skin Viral<br>[0.87] | URI<br>[1.31]   | Falls<br>[1.11]     |
| N Lincolnshire        | Dermatitis<br>[1.44] | Asthma<br>[1.31]   | Neonatal<br>[0.82] | Iron<br>[3.44]     | Anxiety<br>[1.09]    | Conduct<br>[0.97]    | Congenital<br>[1.08] | Skin Viral<br>[0.87] | URI<br>[1.3]    | Falls<br>[1.09]     |
| N Yorkshire           | Dermatitis<br>[1.43] | Neonatal<br>[1.05] | Asthma<br>[1.32]   | Iron<br>[3.75]     | Anxiety<br>[1.06]    | Conduct<br>[0.98]    | Congenital<br>[1.11] | Skin Viral<br>[0.88] | URI<br>[1.28]   | Falls<br>[1.0]      |
| Rotherham             | Dermatitis<br>[1.44] | Asthma<br>[1.29]   | Neonatal<br>[0.83] | Iron<br>[2.29]     | Anxiety<br>[1.1]     | Conduct<br>[0.97]    | Congenital<br>[1.08] | Skin Viral<br>[0.86] | URI<br>[1.32]   | Falls<br>[1.15]     |
| Sheffield             | Dermatitis<br>[1.44] | Neonatal<br>[0.97] | Asthma<br>[1.36]   | Iron<br>[4.14]     | Anxiety<br>[1.05]    | Conduct<br>[0.98]    | Congenital<br>[1.13] | Skin Viral<br>[0.89] | URI<br>[1.28]   | Falls<br>[0.95]     |
| Wakefield             | Dermatitis<br>[1.44] | Asthma<br>[1.31]   | Iron<br>[3.62]     | Neonatal<br>[0.73] | Anxiety<br>[1.09]    | Conduct<br>[0.97]    | Congenital<br>[1.08] | Skin Viral<br>[0.86] | URI<br>[1.31]   | Falls<br>[1.12]     |
| York                  | Dermatitis<br>[1.44] | Asthma<br>[1.43]   | Neonatal<br>[0.86] | Anxiety<br>[1.03]  | Conduct<br>[0.99]    | Congenital<br>[1.16] | Iron<br>[3.89]       | Skin Viral<br>[0.9]  | URI<br>[1.26]   | Falls<br>[0.89]     |
| N Ireland             | Dermatitis<br>[1.19] | Anxiety<br>[1.71]  | Neonatal<br>[0.84] | Asthma<br>[1.13]   | Skin Viral<br>[0.94] | Congenital<br>[1.02] | Conduct<br>[0.88]    | URI<br>[1.27]        | Falls<br>[0.98] | Headaches<br>[0.97] |
| Scotland              | Dermatitis<br>[1.29] | Iron<br>[3.4]      | Asthma<br>[1.22]   | Neonatal<br>[0.79] | Anxiety<br>[1.17]    | Congenital<br>[1.19] | Skin Viral<br>[0.93] | Conduct<br>[0.95]    | Vit A<br>[1.78] | URI<br>[1.3]        |

**eFigure 9d. Leading ten causes of YLDs with the ratio of observed YLDs to YLDs expected on the basis of Socio-Demographic Index alone in 2017, 5-9 years, both sexes combined.**  
The top ten causes contributing to YLDs are listed globally, by socio-demographic quintile, and then by GBD superregion, region, country, and subnationally where modeled. For each cell, the ratio of observed YLDs to YLDs expected on the basis of socio-demographic index (SDI) alone are listed. Abbreviations: YLD=year of life lived with disability, GBD=Global Burden of Disease.

Values shown in brackets represent the ratio of observed YLDs to predicted YLDs on the basis of Socio-Demographic Index (SDI), rounded to two (2) digits. Color ranges (shown below) were calculated to place a roughly equal number of cells into each bin.

| COLOR KEY:                  |                     | [0.0-0.8]            | [0.8-0.89]           | [0.89-0.97]          | [0.97-1.02]          | [1.02-1.1]           | [1.1-1.24]           | [1.24-1.42]          | [1.42-1.91]          | 1.91+                |
|-----------------------------|---------------------|----------------------|----------------------|----------------------|----------------------|----------------------|----------------------|----------------------|----------------------|----------------------|
|                             | 1                   | 2                    | 3                    | 4                    | 5                    | 6                    | 7                    | 8                    | 9                    | 10                   |
| Wales                       | Dermatitis<br>[1.2] | Neonatal<br>[0.81]   | Iron<br>[3.27]       | Asthma<br>[1.16]     | Anxiety<br>[1.19]    | Skin Viral<br>[1.01] | Conduct<br>[0.95]    | Congenital<br>[1.03] | URI<br>[1.31]        | Falls<br>[1.22]      |
| Latin America and Caribbean | Neonatal<br>[1.15]  | Asthma<br>[1.34]     | Dermatitis<br>[0.9]  | Vit A<br>[0.94]      | Iron<br>[0.72]       | Diarrhea<br>[1.37]   | Epilepsy<br>[1.23]   | Skin Viral<br>[0.82] | Headaches<br>[1.36]  | Conduct<br>[0.79]    |
| Andean Latin America        | Asthma<br>[1.71]    | Dermatitis<br>[1.48] | Iron<br>[1.31]       | Neonatal<br>[1.09]   | Vit A<br>[0.77]      | Headaches<br>[1.46]  | Diarrhea<br>[1.18]   | Skin Viral<br>[0.83] | Conduct<br>[0.78]    | Epilepsy<br>[1.08]   |
| Bolivia                     | Iron<br>[1.64]      | Asthma<br>[1.94]     | Dermatitis<br>[1.58] | Neonatal<br>[1.07]   | Vit A<br>[0.63]      | Diarrhea<br>[1.38]   | Headaches<br>[1.53]  | Skin Viral<br>[0.86] | Conduct<br>[0.8]     | Anxiety<br>[0.94]    |
| Ecuador                     | Asthma<br>[1.57]    | Neonatal<br>[1.12]   | Dermatitis<br>[1.3]  | Headaches<br>[1.73]  | Diarrhea<br>[1.46]   | Epilepsy<br>[1.3]    | Skin Viral<br>[0.83] | Conduct<br>[0.78]    | Anxiety<br>[0.88]    | Congenital<br>[0.71] |
| Peru                        | Iron<br>[1.63]      | Dermatitis<br>[1.54] | Asthma<br>[1.7]      | Neonatal<br>[1.1]    | Vit A<br>[1.0]       | Skin Viral<br>[0.82] | Headaches<br>[1.31]  | Conduct<br>[0.78]    | Anxiety<br>[0.87]    | Epilepsy<br>[1.03]   |
| Caribbean                   | Iron<br>[1.84]      | Asthma<br>[1.79]     | Dermatitis<br>[1.15] | Neonatal<br>[0.93]   | Vit A<br>[1.02]      | Skin Viral<br>[0.82] | Diarrhea<br>[1.19]   | Anxiety<br>[0.96]    | Headaches<br>[1.3]   | Conduct<br>[0.7]     |
| Antigua                     | Iron<br>[4.36]      | Asthma<br>[2.02]     | Dermatitis<br>[1.08] | Neonatal<br>[0.96]   | Vit A<br>[0.97]      | Skin Viral<br>[0.8]  | Anxiety<br>[0.88]    | Headaches<br>[1.3]   | Diarrhea<br>[1.27]   | Conduct<br>[0.68]    |
| Bahamas                     | Asthma<br>[2.15]    | Dermatitis<br>[1.07] | Neonatal<br>[0.96]   | Iron<br>[1.35]       | Skin Viral<br>[0.8]  | Anxiety<br>[0.85]    | Headaches<br>[1.32]  | Diarrhea<br>[1.48]   | Conduct<br>[0.68]    | Epilepsy<br>[1.21]   |
| Barbados                    | Asthma<br>[1.88]    | Neonatal<br>[1.04]   | Dermatitis<br>[1.05] | Iron<br>[1.04]       | Skin Viral<br>[0.8]  | Anxiety<br>[0.86]    | Headaches<br>[1.31]  | Vit A<br>[0.7]       | Conduct<br>[0.69]    | Diarrhea<br>[1.28]   |
| Belize                      | Iron<br>[1.58]      | Asthma<br>[1.96]     | Neonatal<br>[1.02]   | Dermatitis<br>[1.21] | Vit A<br>[0.48]      | Skin Viral<br>[0.85] | Anxiety<br>[1.03]    | Headaches<br>[1.33]  | Conduct<br>[0.71]    | Diarrhea<br>[0.89]   |
| Bermuda                     | Asthma<br>[2.58]    | Dermatitis<br>[1.03] | Neonatal<br>[0.98]   | Skin Viral<br>[0.79] | Anxiety<br>[0.79]    | Iron<br>[1.57]       | Headaches<br>[1.33]  | Diarrhea<br>[1.76]   | Conduct<br>[0.68]    | Vit A<br>[1.26]      |
| Cuba                        | Asthma<br>[2.06]    | Dermatitis<br>[1.11] | Neonatal<br>[0.92]   | Iron<br>[1.31]       | Skin Viral<br>[0.81] | Anxiety<br>[0.91]    | Headaches<br>[1.3]   | Conduct<br>[0.69]    | Congenital<br>[0.67] | Urticaria<br>[1.01]  |
| Dominica                    | Iron<br>[2.17]      | Asthma<br>[1.89]     | Neonatal<br>[1.1]    | Dermatitis<br>[1.11] | Vit A<br>[0.78]      | Skin Viral<br>[0.8]  | Anxiety<br>[0.92]    | Epilepsy<br>[1.26]   | Headaches<br>[1.3]   | Diarrhea<br>[1.14]   |
| Dominican Rep               | Iron<br>[1.37]      | Asthma<br>[1.4]      | Neonatal<br>[1.03]   | Dermatitis<br>[1.21] | Vit A<br>[0.61]      | Diarrhea<br>[1.35]   | Skin Viral<br>[0.85] | Anxiety<br>[1.03]    | Headaches<br>[1.33]  | Conduct<br>[0.72]    |
| Grenada                     | Asthma<br>[1.65]    | Neonatal<br>[1.06]   | Dermatitis<br>[1.15] | Iron<br>[0.96]       | Vit A<br>[0.96]      | Diarrhea<br>[1.54]   | Skin Viral<br>[0.82] | Anxiety<br>[0.97]    | Headaches<br>[1.31]  | Conduct<br>[0.7]     |
| Guyana                      | Iron<br>[1.41]      | Asthma<br>[1.81]     | Neonatal<br>[1.1]    | Dermatitis<br>[1.22] | Vit A<br>[0.69]      | Skin Viral<br>[0.86] | Anxiety<br>[1.05]    | Headaches<br>[1.35]  | Epilepsy<br>[0.93]   | Conduct<br>[0.72]    |
| Haiti                       | Iron<br>[1.22]      | Vit A<br>[0.74]      | Asthma<br>[1.78]     | Dermatitis<br>[1.2]  | Neonatal<br>[1.08]   | Disaster<br>[963.73] | Diarrhea<br>[1.05]   | Skin Viral<br>[0.87] | Anxiety<br>[1.09]    | Headaches<br>[1.52]  |
| Jamaica                     | Asthma<br>[1.97]    | Neonatal<br>[1.02]   | Dermatitis<br>[1.12] | Iron<br>[0.99]       | Vit A<br>[0.89]      | Skin Viral<br>[0.81] | Anxiety<br>[0.93]    | Headaches<br>[1.3]   | Epilepsy<br>[1.17]   | Conduct<br>[0.69]    |
| Puerto Rico                 | Asthma<br>[3.13]    | Neonatal<br>[1.04]   | Dermatitis<br>[1.03] | Iron<br>[2.02]       | Vit A<br>[1.84]      | Skin Viral<br>[0.79] | Anxiety<br>[0.78]    | Headaches<br>[1.32]  | Diarrhea<br>[1.76]   | Conduct<br>[0.69]    |
| St Lucia                    | Asthma<br>[1.91]    | Neonatal<br>[1.08]   | Dermatitis<br>[1.14] | Iron<br>[0.88]       | Diarrhea<br>[1.39]   | Vit A<br>[0.61]      | Skin Viral<br>[0.81] | Anxiety<br>[0.95]    | Headaches<br>[1.31]  | Conduct<br>[0.69]    |
| St Vincent                  | Iron<br>[1.79]      | Asthma<br>[1.85]     | Neonatal<br>[1.03]   | Dermatitis<br>[1.19] | Vit A<br>[0.67]      | Skin Viral<br>[0.84] | Anxiety<br>[1.02]    | Headaches<br>[1.32]  | Diarrhea<br>[0.94]   | Epilepsy<br>[0.95]   |
| Suriname                    | Asthma<br>[2.0]     | Iron<br>[1.55]       | Neonatal<br>[1.02]   | Dermatitis<br>[1.15] | Vit A<br>[0.84]      | Skin Viral<br>[0.82] | Anxiety<br>[0.97]    | Headaches<br>[1.3]   | Epilepsy<br>[1.03]   | Conduct<br>[0.7]     |
| Trinidad Tobago             | Asthma<br>[2.13]    | Neonatal<br>[1.04]   | Dermatitis<br>[1.1]  | Skin Viral<br>[0.8]  | Anxiety<br>[0.9]     | Headaches<br>[1.3]   | Vit A<br>[0.62]      | Iron<br>[0.55]       | Conduct<br>[0.69]    | Epilepsy<br>[1.06]   |
| Virgin Isl US               | Asthma<br>[2.29]    | Neonatal<br>[1.0]    | Dermatitis<br>[1.03] | Iron<br>[2.2]        | Diarrhea<br>[2.15]   | Skin Viral<br>[0.79] | Anxiety<br>[0.79]    | Headaches<br>[1.33]  | Conduct<br>[0.69]    | Epilepsy<br>[1.31]   |
| Central Latin America       | Neonatal<br>[1.37]  | Asthma<br>[0.93]     | Dermatitis<br>[0.81] | Vit A<br>[0.69]      | Diarrhea<br>[1.53]   | Epilepsy<br>[1.54]   | Conduct<br>[0.85]    | Skin Viral<br>[0.83] | Iron<br>[0.38]       | Congenital<br>[0.73] |
| Colombia                    | Neonatal<br>[1.37]  | Dermatitis<br>[0.89] | Asthma<br>[0.95]     | Diarrhea<br>[1.81]   | Epilepsy<br>[1.57]   | Skin Viral<br>[0.83] | Conduct<br>[0.81]    | Headaches<br>[1.22]  | URI<br>[1.26]        | Vit A<br>[0.41]      |
| Costa Rica                  | Neonatal<br>[1.27]  | Asthma<br>[1.36]     | Dermatitis<br>[0.83] | Diarrhea<br>[2.07]   | Epilepsy<br>[1.45]   | Skin Viral<br>[0.82] | Conduct<br>[0.81]    | Vit A<br>[0.48]      | Headaches<br>[1.15]  | Congenital<br>[0.67] |
| El Salvador                 | Neonatal<br>[1.39]  | Iron<br>[1.16]       | Vit A<br>[1.07]      | Asthma<br>[1.21]     | Dermatitis<br>[1.6]  | Diarrhea<br>[1.31]   | Epilepsy<br>[1.31]   | Skin Viral<br>[0.85] | Conduct<br>[0.84]    | Headaches<br>[1.17]  |
| Guatemala                   | Neonatal<br>[1.46]  | Iron<br>[0.71]       | Dermatitis<br>[1.07] | Diarrhea<br>[1.79]   | Asthma<br>[0.8]      | Vit A<br>[0.39]      | Skin Viral<br>[0.87] | Conduct<br>[0.86]    | Epilepsy<br>[0.97]   | Headaches<br>[1.25]  |
| Honduras                    | Iron<br>[0.88]      | Neonatal<br>[1.58]   | Asthma<br>[1.18]     | Dermatitis<br>[1.06] | Vit A<br>[0.6]       | Diarrhea<br>[1.81]   | Epilepsy<br>[1.42]   | Skin Viral<br>[0.87] | Conduct<br>[0.86]    | Headaches<br>[1.26]  |

**eFigure 9d. Leading ten causes of YLDs with the ratio of observed YLDs to YLDs expected on the basis of Socio-Demographic Index alone in 2017, 5-9 years, both sexes combined.**  
The top ten causes contributing to YLDs are listed globally, by socio-demographic quintile, and then by GBD superregion, region, country, and subnationally where modeled. For each cell, the ratio of observed YLDs to YLDs expected on the basis of socio-demographic index (SDI) alone are listed. Abbreviations: YLD=year of life lived with disability, GBD=Global Burden of Disease.

Values shown in brackets represent the ratio of observed YLDs to predicted YLDs on the basis of Socio-Demographic Index (SDI), rounded to two (2) digits. Color ranges (shown below) were calculated to place a roughly equal number of cells into each bin.

| COLOR KEY:      |                    | [0.0-0.8]            | [0.8-0.89]           | [0.89-0.97]          | [0.97-1.02]          | [1.02-1.1]          | [1.1-1.24]           | [1.24-1.42]          | [1.42-1.91]          | 1.91+                |
|-----------------|--------------------|----------------------|----------------------|----------------------|----------------------|---------------------|----------------------|----------------------|----------------------|----------------------|
|                 | 1                  | 2                    | 3                    | 4                    | 5                    | 6                   | 7                    | 8                    | 9                    | 10                   |
| Mexico          | Neonatal<br>[1.38] | Vit A<br>[0.83]      | Asthma<br>[0.87]     | Dermatitis<br>[0.66] | Epilepsy<br>[1.67]   | Conduct<br>[0.87]   | Skin Viral<br>[0.82] | Congenital<br>[0.77] | Headaches<br>[1.07]  | Urticaria<br>[1.02]  |
| Aguascalientes  | Neonatal<br>[1.36] | Asthma<br>[0.96]     | Dermatitis<br>[0.65] | Epilepsy<br>[1.78]   | Vit A<br>[0.68]      | Conduct<br>[0.87]   | Skin Viral<br>[0.81] | Congenital<br>[0.83] | Iron<br>[0.4]        | Headaches<br>[1.07]  |
| Baja CA         | Neonatal<br>[1.34] | Vit A<br>[1.1]       | Asthma<br>[0.84]     | Dermatitis<br>[0.65] | Epilepsy<br>[1.73]   | Conduct<br>[0.87]   | Skin Viral<br>[0.81] | Congenital<br>[0.77] | Headaches<br>[1.07]  | Urticaria<br>[1.05]  |
| Baja CA Sur     | Neonatal<br>[1.42] | Vit A<br>[1.09]      | Asthma<br>[0.93]     | Dermatitis<br>[0.65] | Epilepsy<br>[1.76]   | Conduct<br>[0.87]   | Skin Viral<br>[0.81] | Congenital<br>[0.8]  | Headaches<br>[1.07]  | Urticaria<br>[1.05]  |
| Campeche        | Neonatal<br>[1.51] | Vit A<br>[0.97]      | Asthma<br>[0.86]     | Dermatitis<br>[0.68] | Epilepsy<br>[1.56]   | Iron<br>[0.51]      | Conduct<br>[0.88]    | Skin Viral<br>[0.83] | Congenital<br>[0.76] | Diarrhea<br>[0.89]   |
| Chiapas         | Neonatal<br>[1.45] | Vit A<br>[0.62]      | Asthma<br>[0.85]     | Dermatitis<br>[0.7]  | Epilepsy<br>[1.49]   | Conduct<br>[0.91]   | Skin Viral<br>[0.87] | Diarrhea<br>[0.97]   | Congenital<br>[0.7]  | Headaches<br>[1.15]  |
| Chihuahua       | Neonatal<br>[1.27] | Asthma<br>[0.98]     | Epilepsy<br>[1.71]   | Dermatitis<br>[0.56] | Vit A<br>[0.61]      | Conduct<br>[0.87]   | Skin Viral<br>[0.82] | Congenital<br>[0.85] | Diarrhea<br>[1.01]   | Headaches<br>[1.07]  |
| Coahuila        | Neonatal<br>[1.16] | Asthma<br>[0.97]     | Dermatitis<br>[0.66] | Epilepsy<br>[1.71]   | Vit A<br>[0.72]      | Iron<br>[0.5]       | Conduct<br>[0.87]    | Diarrhea<br>[1.23]   | Skin Viral<br>[0.82] | Congenital<br>[0.75] |
| Colima          | Neonatal<br>[1.45] | Vit A<br>[0.98]      | Asthma<br>[0.9]      | Dermatitis<br>[0.65] | Epilepsy<br>[1.76]   | Conduct<br>[0.87]   | Skin Viral<br>[0.81] | Congenital<br>[0.72] | Headaches<br>[1.07]  | Urticaria<br>[1.04]  |
| Mexico City     | Neonatal<br>[1.45] | Dermatitis<br>[0.81] | Asthma<br>[0.85]     | Epilepsy<br>[2.12]   | Vit A<br>[0.77]      | Skin Viral<br>[0.8] | Conduct<br>[0.81]    | Congenital<br>[0.83] | Headaches<br>[1.07]  | Urticaria<br>[1.16]  |
| Durango         | Neonatal<br>[1.22] | Dermatitis<br>[0.88] | Asthma<br>[0.96]     | Vit A<br>[0.79]      | Epilepsy<br>[1.65]   | Conduct<br>[0.87]   | Skin Viral<br>[0.83] | Congenital<br>[0.77] | Diarrhea<br>[0.92]   | Headaches<br>[1.08]  |
| Guanajuato      | Neonatal<br>[1.25] | Vit A<br>[1.01]      | Asthma<br>[0.93]     | Dermatitis<br>[0.68] | Epilepsy<br>[1.68]   | Conduct<br>[0.88]   | Skin Viral<br>[0.83] | Congenital<br>[0.77] | ASD<br>[1.63]        | Headaches<br>[1.08]  |
| Guerrero        | Neonatal<br>[1.49] | Vit A<br>[0.67]      | Asthma<br>[0.86]     | Dermatitis<br>[0.71] | Epilepsy<br>[1.52]   | Iron<br>[0.31]      | Skin Viral<br>[0.92] | Conduct<br>[0.91]    | Congenital<br>[0.73] | Headaches<br>[1.13]  |
| Hidalgo         | Neonatal<br>[1.72] | Asthma<br>[0.91]     | Vit A<br>[0.6]       | Dermatitis<br>[0.7]  | Epilepsy<br>[1.57]   | Conduct<br>[0.9]    | Skin Viral<br>[0.86] | Congenital<br>[0.75] | Headaches<br>[1.11]  | Urticaria<br>[0.99]  |
| Jalisco         | Neonatal<br>[1.31] | Epilepsy<br>[2.02]   | Asthma<br>[0.8]      | Vit A<br>[0.8]       | Dermatitis<br>[0.66] | Conduct<br>[0.87]   | Skin Viral<br>[0.81] | Congenital<br>[0.83] | Headaches<br>[1.07]  | Urticaria<br>[1.04]  |
| Mexico          | Neonatal<br>[1.63] | Vit A<br>[0.79]      | Asthma<br>[0.8]      | Epilepsy<br>[1.67]   | Dermatitis<br>[0.57] | Conduct<br>[0.87]   | Skin Viral<br>[0.82] | Congenital<br>[0.7]  | Iron<br>[0.33]       | Urticaria<br>[1.02]  |
| Michoacan       | Neonatal<br>[1.2]  | Vit A<br>[0.74]      | Asthma<br>[0.9]      | Dermatitis<br>[0.7]  | Epilepsy<br>[1.51]   | Conduct<br>[0.9]    | Skin Viral<br>[0.86] | Congenital<br>[0.75] | Headaches<br>[1.11]  | Urticaria<br>[0.99]  |
| Morelos         | Neonatal<br>[1.34] | Vit A<br>[0.85]      | Asthma<br>[0.83]     | Epilepsy<br>[1.72]   | Dermatitis<br>[0.57] | Conduct<br>[0.87]   | Skin Viral<br>[0.82] | Congenital<br>[0.83] | Headaches<br>[1.07]  | Urticaria<br>[1.02]  |
| Nayarit         | Neonatal<br>[1.47] | Vit A<br>[0.95]      | Asthma<br>[0.89]     | Dermatitis<br>[0.67] | Epilepsy<br>[1.59]   | Conduct<br>[0.88]   | Skin Viral<br>[0.83] | Iron<br>[0.38]       | Congenital<br>[0.79] | Headaches<br>[1.08]  |
| Nuevo Leon      | Neonatal<br>[1.1]  | Vit A<br>[1.34]      | Asthma<br>[0.83]     | Epilepsy<br>[1.84]   | Dermatitis<br>[0.55] | Conduct<br>[0.86]   | Skin Viral<br>[0.8]  | Congenital<br>[0.78] | Diarrhea<br>[1.01]   | Headaches<br>[1.07]  |
| Oaxaca          | Neonatal<br>[1.42] | Asthma<br>[0.87]     | Dermatitis<br>[0.71] | Vit A<br>[0.51]      | Epilepsy<br>[1.58]   | Conduct<br>[0.91]   | Skin Viral<br>[0.87] | Congenital<br>[0.81] | Headaches<br>[1.13]  | Urticaria<br>[0.99]  |
| Puebla          | Neonatal<br>[1.32] | Asthma<br>[0.9]      | Vit A<br>[0.61]      | Dermatitis<br>[0.7]  | Epilepsy<br>[1.17]   | Conduct<br>[0.9]    | Skin Viral<br>[0.85] | Congenital<br>[0.76] | Headaches<br>[1.11]  | Urticaria<br>[0.99]  |
| Queretaro       | Neonatal<br>[1.44] | Asthma<br>[0.93]     | Dermatitis<br>[0.66] | Epilepsy<br>[1.7]    | Vit A<br>[0.62]      | Conduct<br>[0.87]   | Skin Viral<br>[0.82] | Congenital<br>[0.76] | Headaches<br>[1.07]  | Urticaria<br>[1.03]  |
| Quintana Roo    | Neonatal<br>[1.73] | Vit A<br>[1.11]      | Iron<br>[0.67]       | Asthma<br>[0.86]     | Dermatitis<br>[0.67] | Epilepsy<br>[1.69]  | Diarrhea<br>[1.22]   | Conduct<br>[0.87]    | Skin Viral<br>[0.82] | Congenital<br>[0.81] |
| San Luis Potosi | Neonatal<br>[1.19] | Asthma<br>[0.92]     | Vit A<br>[0.83]      | Dermatitis<br>[0.68] | Epilepsy<br>[1.64]   | Conduct<br>[0.88]   | Skin Viral<br>[0.83] | Congenital<br>[0.84] | Headaches<br>[1.08]  | Urticaria<br>[1.0]   |
| Sinaloa         | Neonatal<br>[1.24] | Vit A<br>[1.05]      | Asthma<br>[0.9]      | Dermatitis<br>[0.66] | Epilepsy<br>[1.69]   | Iron<br>[0.48]      | Conduct<br>[0.87]    | Skin Viral<br>[0.81] | Congenital<br>[0.74] | Headaches<br>[1.07]  |
| Sonora          | Neonatal<br>[1.21] | Vit A<br>[0.97]      | Asthma<br>[0.94]     | Dermatitis<br>[0.66] | Epilepsy<br>[1.76]   | Iron<br>[0.51]      | Conduct<br>[0.87]    | Skin Viral<br>[0.81] | Congenital<br>[0.83] | Headaches<br>[1.07]  |
| Tabasco         | Neonatal<br>[1.49] | Vit A<br>[1.04]      | Iron<br>[0.77]       | Asthma<br>[0.8]      | Dermatitis<br>[0.67] | Epilepsy<br>[1.6]   | Conduct<br>[0.88]    | Skin Viral<br>[0.83] | Congenital<br>[0.86] | Diarrhea<br>[0.97]   |
| Tamaulipas      | Neonatal<br>[1.52] | Asthma<br>[0.9]      | Vit A<br>[0.88]      | Epilepsy<br>[1.68]   | Dermatitis<br>[0.55] | Conduct<br>[0.87]   | Skin Viral<br>[0.82] | Diarrhea<br>[1.16]   | Congenital<br>[0.79] | Headaches<br>[1.07]  |
| Tlaxcala        | Neonatal<br>[1.48] | Asthma<br>[0.93]     | Vit A<br>[0.77]      | Dermatitis<br>[0.69] | Epilepsy<br>[1.65]   | Conduct<br>[0.88]   | Skin Viral<br>[0.84] | Congenital<br>[0.84] | Headaches<br>[1.09]  | Urticaria<br>[0.99]  |
| Veracruz        | Neonatal<br>[1.48] | Vit A<br>[0.74]      | Asthma<br>[0.85]     | Dermatitis<br>[0.7]  | Epilepsy<br>[1.62]   | Conduct<br>[0.89]   | Skin Viral<br>[0.85] | Congenital<br>[0.81] | Headaches<br>[1.1]   | Urticaria<br>[0.99]  |

**eFigure 9d. Leading ten causes of YLDs with the ratio of observed YLDs to YLDs expected on the basis of Socio-Demographic Index alone in 2017, 5-9 years, both sexes combined.**  
The top ten causes contributing to YLDs are listed globally, by socio-demographic quintile, and then by GBD superregion, region, country, and subnationally where modeled. For each cell, the ratio of observed YLDs to YLDs expected on the basis of socio-demographic index (SDI) alone are listed. Abbreviations: YLD=year of life lived with disability, GBD=Global Burden of Disease.

Values shown in brackets represent the ratio of observed YLDs to predicted YLDs on the basis of Socio-Demographic Index (SDI), rounded to two (2) digits. Color ranges (shown below) were calculated to place a roughly equal number of cells into each bin.

| COLOR KEY:                    |                    | [0.0-0.8]            | [0.8-0.89]           | [0.89-0.97]          | [0.97-1.02]          | [1.02-1.1]           | [1.1-1.24]           | [1.24-1.42]          | [1.42-1.91]          | 1.91+                |
|-------------------------------|--------------------|----------------------|----------------------|----------------------|----------------------|----------------------|----------------------|----------------------|----------------------|----------------------|
|                               | 1                  | 2                    | 3                    | 4                    | 5                    | 6                    | 7                    | 8                    | 9                    | 10                   |
| Yucatan                       | Neonatal<br>[1.27] | Asthma<br>[0.83]     | Vit A<br>[0.77]      | Epilepsy<br>[1.68]   | Dermatitis<br>[0.63] | Iron<br>[0.51]       | Conduct<br>[0.87]    | Skin Viral<br>[0.82] | Congenital<br>[0.81] | Headaches<br>[1.08]  |
| Zacatecas                     | Neonatal<br>[0.95] | Asthma<br>[0.94]     | Vit A<br>[0.71]      | Dermatitis<br>[0.68] | Epilepsy<br>[1.66]   | Conduct<br>[0.88]    | Skin Viral<br>[0.84] | Iron<br>[0.33]       | Congenital<br>[0.71] | Headaches<br>[1.08]  |
| Nicaragua                     | Neonatal<br>[1.47] | Dermatitis<br>[1.07] | Diarrhea<br>[2.11]   | Asthma<br>[0.94]     | Epilepsy<br>[1.19]   | Iron<br>[0.26]       | Skin Viral<br>[0.87] | Conduct<br>[0.86]    | Vit A<br>[0.29]      | Congenital<br>[0.77] |
| Panama                        | Neonatal<br>[1.25] | Dermatitis<br>[1.1]  | Asthma<br>[1.28]     | Iron<br>[1.17]       | Diarrhea<br>[2.78]   | Vit A<br>[0.71]      | Skin Viral<br>[0.81] | Epilepsy<br>[1.27]   | Conduct<br>[0.81]    | Headaches<br>[1.15]  |
| Venezuela                     | Neonatal<br>[1.36] | Diarrhea<br>[3.49]   | Dermatitis<br>[0.95] | Asthma<br>[1.01]     | Epilepsy<br>[1.5]    | Vit A<br>[0.62]      | Skin Viral<br>[0.82] | Conduct<br>[0.82]    | Headaches<br>[1.14]  | Congenital<br>[0.7]  |
| <b>Tropical Latin America</b> | Asthma<br>[1.69]   | Vit A<br>[1.38]      | Neonatal<br>[0.91]   | Dermatitis<br>[0.77] | Iron<br>[0.74]       | Headaches<br>[1.67]  | Anxiety<br>[1.06]    | Congenital<br>[0.92] | Skin Viral<br>[0.92] | Back Pain<br>[2.48]  |
| Brazil                        | Asthma<br>[1.69]   | Vit A<br>[1.42]      | Neonatal<br>[0.92]   | Dermatitis<br>[0.75] | Iron<br>[0.75]       | Headaches<br>[1.66]  | Anxiety<br>[1.05]    | Congenital<br>[0.92] | Skin Viral<br>[0.8]  | Back Pain<br>[2.5]   |
| Acre                          | Iron<br>[1.07]     | Asthma<br>[1.47]     | Neonatal<br>[0.99]   | Vit A<br>[1.07]      | Dermatitis<br>[0.8]  | Diarrhea<br>[1.43]   | Headaches<br>[1.7]   | Congenital<br>[1.04] | Anxiety<br>[1.15]    | Skin Viral<br>[0.84] |
| Alagoas                       | Vit A<br>[1.22]    | Asthma<br>[1.38]     | Neonatal<br>[0.85]   | Dermatitis<br>[0.68] | Iron<br>[0.36]       | Headaches<br>[1.77]  | Anxiety<br>[1.2]     | Diarrhea<br>[1.1]    | Congenital<br>[0.93] | Skin Viral<br>[0.86] |
| Amapa                         | Asthma<br>[1.6]    | Neonatal<br>[0.96]   | Iron<br>[1.0]        | Vit A<br>[1.04]      | Dermatitis<br>[0.76] | Headaches<br>[1.67]  | Anxiety<br>[1.06]    | Congenital<br>[0.9]  | Skin Viral<br>[0.81] | Back Pain<br>[2.41]  |
| Amazonas                      | Asthma<br>[1.57]   | Vit A<br>[1.33]      | Iron<br>[1.1]        | Neonatal<br>[0.82]   | Dermatitis<br>[0.78] | Headaches<br>[1.68]  | Anxiety<br>[1.1]     | Congenital<br>[0.91] | Skin Viral<br>[0.82] | Back Pain<br>[2.57]  |
| Bahia                         | Vit A<br>[1.46]    | Asthma<br>[1.43]     | Iron<br>[0.82]       | Neonatal<br>[0.91]   | Dermatitis<br>[1.09] | Diarrhea<br>[1.36]   | Headaches<br>[1.71]  | Anxiety<br>[1.16]    | Congenital<br>[0.92] | Skin Viral<br>[0.84] |
| Ceara                         | Vit A<br>[1.51]    | Asthma<br>[1.51]     | Neonatal<br>[0.86]   | Dermatitis<br>[0.81] | Headaches<br>[1.7]   | Diarrhea<br>[1.26]   | Anxiety<br>[1.15]    | Scabies<br>[2.67]    | Congenital<br>[0.93] | Skin Viral<br>[0.84] |
| Distrito Federal              | Asthma<br>[1.97]   | Neonatal<br>[1.01]   | Dermatitis<br>[0.69] | Vit A<br>[1.85]      | Headaches<br>[1.68]  | Anxiety<br>[0.9]     | Congenital<br>[0.98] | Skin Viral<br>[0.79] | Back Pain<br>[2.34]  | Conduct<br>[0.74]    |
| Espirito Santo                | Asthma<br>[1.94]   | Vit A<br>[2.01]      | Neonatal<br>[0.9]    | Iron<br>[1.0]        | Dermatitis<br>[0.75] | Headaches<br>[1.66]  | Anxiety<br>[1.04]    | Congenital<br>[0.9]  | Skin Viral<br>[0.8]  | Back Pain<br>[2.42]  |
| Goiás                         | Asthma<br>[1.72]   | Neonatal<br>[0.83]   | Vit A<br>[1.16]      | Dermatitis<br>[0.77] | Iron<br>[0.66]       | Headaches<br>[1.68]  | Anxiety<br>[1.07]    | Congenital<br>[0.9]  | Skin Viral<br>[0.81] | Back Pain<br>[2.53]  |
| Maranhao                      | Vit A<br>[1.09]    | Asthma<br>[1.37]     | Iron<br>[0.55]       | Neonatal<br>[0.95]   | Dermatitis<br>[0.81] | Headaches<br>[1.82]  | Anxiety<br>[1.21]    | Diarrhea<br>[1.02]   | Skin Viral<br>[0.86] | Congenital<br>[0.87] |
| Mato Grosso                   | Asthma<br>[1.81]   | Vit A<br>[1.35]      | Neonatal<br>[0.87]   | Dermatitis<br>[0.76] | Headaches<br>[1.67]  | Anxiety<br>[1.06]    | Congenital<br>[0.9]  | Skin Viral<br>[0.81] | Diarrhea<br>[1.25]   | Back Pain<br>[2.53]  |
| Mato Grosso do Sul            | Asthma<br>[1.66]   | Neonatal<br>[1.0]    | Vit A<br>[0.98]      | Dermatitis<br>[0.77] | Headaches<br>[1.68]  | Congenital<br>[1.01] | Anxiety<br>[1.07]    | Diarrhea<br>[1.26]   | Skin Viral<br>[0.81] | Back Pain<br>[2.56]  |
| Minas Gerais                  | Asthma<br>[1.78]   | Neonatal<br>[0.96]   | Vit A<br>[1.31]      | Dermatitis<br>[0.65] | Headaches<br>[1.66]  | Iron<br>[0.55]       | Anxiety<br>[1.06]    | Diarrhea<br>[1.3]    | Congenital<br>[0.91] | Skin Viral<br>[0.81] |
| Para                          | Asthma<br>[1.54]   | Vit A<br>[0.99]      | Iron<br>[0.79]       | Neonatal<br>[0.88]   | Dermatitis<br>[0.83] | Diarrhea<br>[1.67]   | Headaches<br>[1.73]  | Anxiety<br>[1.18]    | Congenital<br>[0.91] | Skin Viral<br>[0.85] |
| Paraiba                       | Vit A<br>[1.52]    | Asthma<br>[1.44]     | Neonatal<br>[0.82]   | Dermatitis<br>[0.82] | Diarrhea<br>[1.48]   | Headaches<br>[1.74]  | Iron<br>[0.35]       | Anxiety<br>[1.18]    | Congenital<br>[0.93] | Skin Viral<br>[0.86] |
| Parana                        | Asthma<br>[1.91]   | Neonatal<br>[0.94]   | Vit A<br>[1.18]      | Dermatitis<br>[0.67] | Headaches<br>[1.67]  | Anxiety<br>[1.03]    | Congenital<br>[0.97] | Skin Viral<br>[0.8]  | Back Pain<br>[2.5]   | Diarrhea<br>[1.23]   |
| Pernambuco                    | Vit A<br>[1.4]     | Iron<br>[1.05]       | Asthma<br>[1.55]     | Neonatal<br>[0.86]   | Dermatitis<br>[0.79] | Headaches<br>[1.69]  | Anxiety<br>[1.16]    | Congenital<br>[0.97] | Skin Viral<br>[0.84] | Back Pain<br>[2.61]  |
| Piaui                         | Asthma<br>[1.48]   | Vit A<br>[0.83]      | Neonatal<br>[0.98]   | Dermatitis<br>[0.83] | Headaches<br>[1.78]  | Diarrhea<br>[1.2]    | Anxiety<br>[1.21]    | Congenital<br>[0.95] | Skin Viral<br>[0.87] | Back Pain<br>[2.81]  |
| Rio de Janeiro                | Asthma<br>[1.74]   | Neonatal<br>[1.14]   | Dermatitis<br>[0.73] | Headaches<br>[1.67]  | Vit A<br>[0.84]      | Anxiety<br>[0.99]    | Congenital<br>[0.9]  | Skin Viral<br>[0.79] | Conduct<br>[0.75]    | Epilepsy<br>[1.2]    |
| Rio Grande do Norte           | Asthma<br>[1.51]   | Vit A<br>[1.12]      | Neonatal<br>[0.79]   | Iron<br>[0.69]       | Dermatitis<br>[0.8]  | Diarrhea<br>[1.47]   | Headaches<br>[1.69]  | Anxiety<br>[1.14]    | Skin Viral<br>[0.84] | Congenital<br>[0.89] |
| Rio Grande do Sul             | Asthma<br>[1.95]   | Neonatal<br>[0.96]   | Dermatitis<br>[0.98] | Congenital<br>[1.57] | Epilepsy<br>[2.11]   | Vit A<br>[1.01]      | Back Pain<br>[3.24]  | Headaches<br>[1.71]  | Anxiety<br>[1.01]    | Iron<br>[0.66]       |
| Rondonia                      | Asthma<br>[1.55]   | Neonatal<br>[1.01]   | Vit A<br>[1.09]      | Iron<br>[0.71]       | Congenital<br>[1.6]  | Dermatitis<br>[0.79] | Headaches<br>[1.68]  | Anxiety<br>[1.11]    | Skin Viral<br>[0.82] | Hearing<br>[2.16]    |
| Roraima                       | Asthma<br>[1.58]   | Neonatal<br>[1.01]   | Vit A<br>[1.38]      | Iron<br>[0.83]       | Dermatitis<br>[0.77] | Headaches<br>[1.67]  | Anxiety<br>[1.07]    | Congenital<br>[0.91] | Skin Viral<br>[0.81] | Back Pain<br>[2.55]  |
| Santa Catarina                | Asthma<br>[2.07]   | Vit A<br>[1.63]      | Neonatal<br>[0.86]   | Iron<br>[1.1]        | Dermatitis<br>[0.74] | Headaches<br>[2.07]  | Anxiety<br>[1.01]    | Congenital<br>[0.95] | Skin Viral<br>[0.79] | Back Pain<br>[2.4]   |

**eFigure 9d. Leading ten causes of YLDs with the ratio of observed YLDs to YLDs expected on the basis of Socio-Demographic Index alone in 2017, 5-9 years, both sexes combined.**  
The top ten causes contributing to YLDs are listed globally, by socio-demographic quintile, and then by GBD superregion, region, country, and subnationally where modeled. For each cell, the ratio of observed YLDs to YLDs expected on the basis of socio-demographic index (SDI) alone are listed. Abbreviations: YLD=year of life lived with disability, GBD=Global Burden of Disease.

Values shown in brackets represent the ratio of observed YLDs to predicted YLDs on the basis of Socio-Demographic Index (SDI), rounded to two (2) digits. Color ranges (shown below) were calculated to place a roughly equal number of cells into each bin.

| COLOR KEY:                   |                      | [0.0-0.8]                       | [0.8-0.89]           | [0.89-0.97]          | [0.97-1.02]          | [1.02-1.1]           | [1.1-1.24]           | [1.24-1.42]          | [1.42-1.91]                     | 1.91+                           |
|------------------------------|----------------------|---------------------------------|----------------------|----------------------|----------------------|----------------------|----------------------|----------------------|---------------------------------|---------------------------------|
|                              | 1                    | 2                               | 3                    | 4                    | 5                    | 6                    | 7                    | 8                    | 9                               | 10                              |
| Sao Paulo                    | Asthma<br>[1.91]     | Neonatal<br>[0.98]              | Vit A<br>[1.26]      | Dermatitis<br>[0.63] | Headaches<br>[1.6]   | Anxiety<br>[0.97]    | Iron<br>[0.74]       | Skin Viral<br>[0.79] | Back Pain<br>[2.44]             | Conduct<br>[0.75]               |
| Sergipe                      | Vit A<br>[1.59]      | Asthma<br>[1.63]                | Neonatal<br>[1.0]    | Iron<br>[0.59]       | Dermatitis<br>[0.66] | Headaches<br>[1.69]  | Anxiety<br>[1.13]    | Congenital<br>[0.9]  | Skin Viral<br>[0.83]            | Back Pain<br>[2.56]             |
| Tocantins                    | Asthma<br>[1.52]     | Neonatal<br>[0.98]              | Vit A<br>[1.09]      | Dermatitis<br>[0.8]  | Iron<br>[0.5]        | Headaches<br>[1.69]  | Anxiety<br>[1.13]    | Skin Viral<br>[0.83] | Congenital<br>[0.89]            | Back Pain<br>[2.62]             |
| Paraguay                     | Asthma<br>[1.77]     | Dermatitis<br>[1.05]            | Iron<br>[0.82]       | Neonatal<br>[0.78]   | Vit A<br>[0.89]      | Diarrhea<br>[2.06]   | Headaches<br>[1.72]  | Anxiety<br>[1.14]    | Congenital<br>[0.97]            | Skin Viral<br>[0.83]            |
| North Africa and Middle East | Iron<br>[1.81]       | Neonatal<br>[0.96]              | Vit A<br>[1.04]      | Asthma<br>[0.98]     | Dermatitis<br>[0.7]  | Diarrhea<br>[1.67]   | Conduct<br>[1.08]    | Anxiety<br>[1.02]    | Skin Viral<br>[0.8]             | Congenital<br>[0.84]            |
| Afghanistan                  | Vit A<br>[0.47]      | Iron<br>[0.38]                  | Diarrhea<br>[1.65]   | Dermatitis<br>[0.99] | Neonatal<br>[1.35]   | Asthma<br>[1.12]     | ID<br>[3.72]         | Conduct<br>[1.16]    | Leish<br>[1508.77]              | Conflict<br>Terror<br>[62.7]    |
| Algeria                      | Neonatal<br>[1.07]   | Asthma<br>[1.12]                | Iron<br>[1.1]        | Dermatitis<br>[0.68] | Vit A<br>[0.98]      | Conduct<br>[1.07]    | Anxiety<br>[0.97]    | Skin Viral<br>[0.78] | Congenital<br>[0.83]            | Epilepsy<br>[1.18]              |
| Bahrain                      | Neonatal<br>[1.03]   | Dermatitis<br>[0.9]             | Asthma<br>[1.04]     | Conduct<br>[1.06]    | Diarrhea<br>[1.85]   | Vit A<br>[0.8]       | Anxiety<br>[0.95]    | Skin Viral<br>[0.78] | Epilepsy<br>[1.19]              | Congenital<br>[0.77]            |
| Egypt                        | Iron<br>[1.38]       | Neonatal<br>[1.04]              | Asthma<br>[1.17]     | Conduct<br>[1.1]     | Dermatitis<br>[0.57] | Diarrhea<br>[1.18]   | Vit A<br>[0.46]      | Epilepsy<br>[1.19]   | Skin Viral<br>[0.82]            | Anxiety<br>[0.98]               |
| Iran                         | Neonatal<br>[1.24]   | Iron<br>[1.1]                   | Asthma<br>[0.85]     | Diarrhea<br>[2.01]   | Anxiety<br>[1.26]    | Conduct<br>[1.12]    | Dermatitis<br>[0.54] | Congenital<br>[0.94] | Epilepsy<br>[1.37]              | Skin Viral<br>[0.77]            |
| Iraq                         | Iron<br>[1.59]       | Neonatal<br>[1.12]              | Vit A<br>[0.97]      | Asthma<br>[1.03]     | Dermatitis<br>[0.66] | Conduct<br>[1.12]    | Diarrhea<br>[1.22]   | Anxiety<br>[1.05]    | Conflict<br>Terror<br>[1304.79] | Skin Viral<br>[0.83]            |
| Jordan                       | Neonatal<br>[1.39]   | Asthma<br>[1.32]                | Iron<br>[1.23]       | Vit A<br>[1.07]      | Dermatitis<br>[0.68] | Conduct<br>[1.06]    | Anxiety<br>[0.97]    | Diarrhea<br>[1.44]   | Skin Viral<br>[0.78]            | Congenital<br>[0.82]            |
| Kuwait                       | Neonatal<br>[1.16]   | Asthma<br>[1.3]                 | Diarrhea<br>[2.31]   | Dermatitis<br>[0.67] | Conduct<br>[1.06]    | Diarrhea<br>[2.33]   | Anxiety<br>[0.87]    | Skin Viral<br>[0.77] | Congenital<br>[0.85]            | Epilepsy<br>[1.29]              |
| Lebanon                      | Neonatal<br>[1.03]   | Asthma<br>[1.45]                | Dermatitis<br>[0.8]  | Iron<br>[1.26]       | Anxiety<br>[1.11]    | Conduct<br>[1.02]    | Diarrhea<br>[1.88]   | Congenital<br>[0.89] | Skin Viral<br>[0.78]            | Epilepsy<br>[1.11]              |
| Libya                        | Iron<br>[2.54]       | Neonatal<br>[1.03]              | Dermatitis<br>[0.87] | Asthma<br>[1.07]     | Diarrhea<br>[3.09]   | Conduct<br>[1.06]    | Anxiety<br>[0.89]    | Skin Viral<br>[0.78] | Congenital<br>[0.86]            | Conflict<br>Terror<br>[7017.37] |
| Morocco                      | Iron<br>[1.11]       | Vit A<br>[1.24]                 | Neonatal<br>[1.06]   | Dermatitis<br>[0.82] | Asthma<br>[0.76]     | Conduct<br>[1.11]    | Diarrhea<br>[1.35]   | Anxiety<br>[1.13]    | Skin Viral<br>[0.84]            | Congenital<br>[0.86]            |
| Palestine                    | Neonatal<br>[1.14]   | Iron<br>[0.58]                  | Asthma<br>[1.08]     | Dermatitis<br>[0.79] | Vit A<br>[0.47]      | Conduct<br>[1.13]    | Anxiety<br>[1.15]    | Diarrhea<br>[1.07]   | Skin Viral<br>[0.85]            | Congenital<br>[0.82]            |
| Oman                         | Iron<br>[2.35]       | Neonatal<br>[1.07]              | Asthma<br>[0.95]     | Diarrhea<br>[2.36]   | Dermatitis<br>[0.6]  | Conduct<br>[1.06]    | Anxiety<br>[0.91]    | Skin Viral<br>[0.78] | Congenital<br>[0.86]            | Vit A<br>[0.79]                 |
| Qatar                        | Neonatal<br>[0.97]   | Dermatitis<br>[0.87]            | Asthma<br>[0.95]     | Iron<br>[1.36]       | Conduct<br>[1.06]    | Anxiety<br>[0.89]    | Skin Viral<br>[0.78] | Congenital<br>[0.85] | Epilepsy<br>[1.28]              | Blindness<br>[1.39]             |
| Saudi Arabia                 | Dermatitis<br>[0.85] | Neonatal<br>[0.73]              | Asthma<br>[0.84]     | Conduct<br>[1.07]    | Diarrhea<br>[2.27]   | Anxiety<br>[0.88]    | Congenital<br>[0.92] | Skin Viral<br>[0.78] | Epilepsy<br>[1.38]              | Iron<br>[0.92]                  |
| Sudan                        | Iron<br>[1.09]       | Vit A<br>[0.7]                  | Diarrhea<br>[1.93]   | Asthma<br>[1.02]     | Neonatal<br>[0.86]   | Dermatitis<br>[0.72] | Conduct<br>[1.12]    | ID<br>[4.23]         | Hemog<br>[2.14]                 | Anxiety<br>[1.16]               |
| Syria                        | Iron<br>[1.53]       | Conflict<br>Terror<br>[6366.83] | Neonatal<br>[0.93]   | Asthma<br>[0.91]     | Vit A<br>[0.7]       | Conduct<br>[1.08]    | Dermatitis<br>[0.54] | Anxiety<br>[1.08]    | Diarrhea<br>[1.18]              | Skin Viral<br>[0.82]            |
| Tunisia                      | Neonatal<br>[1.03]   | Dermatitis<br>[0.79]            | Asthma<br>[0.87]     | Conduct<br>[1.07]    | Anxiety<br>[1.0]     | Diarrhea<br>[1.3]    | Skin Viral<br>[0.79] | Congenital<br>[0.77] | Urticaria<br>[1.04]             | Epilepsy<br>[0.91]              |
| Turkey                       | Neonatal<br>[0.75]   | Iron<br>[1.24]                  | Asthma<br>[0.92]     | Vit A<br>[1.24]      | Dermatitis<br>[0.61] | Conduct<br>[1.04]    | Diarrhea<br>[1.7]    | Skin Viral<br>[0.78] | Epilepsy<br>[1.31]              | Congenital<br>[0.78]            |
| UAE                          | Neonatal<br>[1.02]   | Asthma<br>[1.45]                | Iron<br>[3.32]       | Dermatitis<br>[0.85] | Diarrhea<br>[2.39]   | Conduct<br>[1.02]    | Anxiety<br>[0.82]    | Skin Viral<br>[0.77] | Congenital<br>[0.9]             | Epilepsy<br>[1.53]              |
| Yemen                        | Iron<br>[3.47]       | Vit A<br>[1.37]                 | Neonatal<br>[1.29]   | Diarrhea<br>[2.06]   | Dermatitis<br>[0.97] | Oth NTD<br>[1.98]    | Hemog<br>[2.56]      | Asthma<br>[0.82]     | Conduct<br>[1.1]                | Oth Un Inf<br>[3.63]            |
| South Asia                   | Iron<br>[1.96]       | Vit A<br>[1.56]                 | Neonatal<br>[1.5]    | Dermatitis<br>[0.6]  | ID<br>[4.93]         | Congenital<br>[1.03] | Skin Viral<br>[0.85] | Conduct<br>[0.84]    | Hemog<br>[2.19]                 | Diarrhea<br>[0.82]              |
| Bangladesh                   | Iron<br>[0.99]       | Neonatal<br>[1.56]              | Vit A<br>[0.48]      | Dermatitis<br>[0.89] | Congenital<br>[0.99] | Nematode<br>[3.53]   | Skin Viral<br>[0.84] | Anxiety<br>[1.06]    | Conduct<br>[0.81]               | Headaches<br>[1.17]             |
| Bhutan                       | Iron<br>[3.55]       | Vit A<br>[1.46]                 | Neonatal<br>[1.33]   | Dermatitis<br>[0.9]  | Diarrhea<br>[1.31]   | Oth NTD<br>[3.29]    | Skin Viral<br>[0.83] | Conduct<br>[0.79]    | Epilepsy<br>[0.99]              | Congenital<br>[0.82]            |

**eFigure 9d. Leading ten causes of YLDs with the ratio of observed YLDs to YLDs expected on the basis of Socio-Demographic Index alone in 2017, 5-9 years, both sexes combined.**  
The top ten causes contributing to YLDs are listed globally, by socio-demographic quintile, and then by GBD superregion, region, country, and subnationally where modeled. For each cell, the ratio of observed YLDs to YLDs expected on the basis of socio-demographic index (SDI) alone are listed. Abbreviations: YLD=year of life lived with disability, GBD=Global Burden of Disease.

Values shown in brackets represent the ratio of observed YLDs to predicted YLDs on the basis of Socio-Demographic Index (SDI), rounded to two (2) digits. Color ranges (shown below) were calculated to place a roughly equal number of cells into each bin.

| COLOR KEY:        |                    | [0.0-0.8]          | [0.8-0.89]           | [0.89-0.97]          | [0.97-1.02]          | [1.02-1.1]           | [1.1-1.24]           | [1.24-1.42]          | [1.42-1.91]          | 1.91+                |
|-------------------|--------------------|--------------------|----------------------|----------------------|----------------------|----------------------|----------------------|----------------------|----------------------|----------------------|
|                   | 1                  | 2                  | 3                    | 4                    | 5                    | 6                    | 7                    | 8                    | 9                    | 10                   |
| India             | Iron<br>[2.09]     | Vit A<br>[1.89]    | Neonatal<br>[1.52]   | ID<br>[6.37]         | Congenital<br>[1.1]  | Dermatitis<br>[0.51] | Hemog<br>[2.47]      | Skin Viral<br>[0.86] | Conduct<br>[0.85]    | Diarrhea<br>[0.79]   |
| Andhra Pradesh    | Iron<br>[1.62]     | Vit A<br>[1.51]    | Neonatal<br>[1.69]   | ID<br>[5.32]         | Congenital<br>[1.06] | Dermatitis<br>[0.52] | Skin Viral<br>[0.85] | Conduct<br>[0.85]    | Hemog<br>[1.93]      | Urticaria<br>[0.98]  |
| Arunachal Pradesh | Iron<br>[1.78]     | Vit A<br>[1.71]    | Neonatal<br>[1.59]   | ID<br>[5.2]          | Congenital<br>[1.08] | Dermatitis<br>[0.53] | Skin Viral<br>[0.85] | Conduct<br>[0.84]    | Hemog<br>[2.18]      | Urticaria<br>[0.99]  |
| Assam             | Iron<br>[1.47]     | Vit A<br>[1.47]    | Neonatal<br>[1.47]   | ID<br>[6.72]         | Congenital<br>[1.12] | Dermatitis<br>[0.52] | Skin Viral<br>[0.85] | Conduct<br>[0.85]    | Hemog<br>[1.92]      | Skin Fung<br>[2.28]  |
| Bihar             | Iron<br>[1.46]     | Vit A<br>[1.35]    | Neonatal<br>[1.79]   | ID<br>[6.89]         | Congenital<br>[1.07] | Dermatitis<br>[0.51] | Hemog<br>[1.81]      | Skin Viral<br>[0.86] | Conduct<br>[0.85]    | Diarrhea<br>[0.85]   |
| Chhattisgarh      | Iron<br>[1.33]     | Vit A<br>[1.12]    | Neonatal<br>[1.59]   | ID<br>[5.82]         | Congenital<br>[1.08] | Dermatitis<br>[0.52] | Skin Viral<br>[0.85] | Conduct<br>[0.85]    | Urticaria<br>[0.98]  | Blindness<br>[1.3]   |
| Delhi             | Iron<br>[6.17]     | Vit A<br>[3.26]    | Neonatal<br>[1.46]   | Congenital<br>[0.96] | Dermatitis<br>[0.41] | Skin Viral<br>[0.78] | Conduct<br>[0.8]     | Hemog<br>[5.26]      | Blindness<br>[1.62]  | Oth NTD<br>[1899.88] |
| Goa               | Neonatal<br>[1.8]  | Vit A<br>[3.35]    | Congenital<br>[1.01] | Dermatitis<br>[0.46] | Skin Viral<br>[0.79] | Conduct<br>[0.81]    | Iron<br>[0.77]       | Urticaria<br>[1.23]  | Diarrhea<br>[1.21]   | Epilepsy<br>[1.05]   |
| Gujarat           | Iron<br>[3.69]     | Vit A<br>[2.16]    | Neonatal<br>[1.53]   | Congenital<br>[1.07] | ID<br>[5.12]         | Hemog<br>[3.12]      | Dermatitis<br>[0.52] | Skin Viral<br>[0.84] | Conduct<br>[0.84]    | Diarrhea<br>[0.81]   |
| Haryana           | Iron<br>[4.72]     | Vit A<br>[2.53]    | Neonatal<br>[1.51]   | Oth NTD<br>[6.72]    | Hemog<br>[3.72]      | Congenital<br>[1.04] | Dermatitis<br>[0.51] | Skin Viral<br>[0.82] | ID<br>[4.52]         | Conduct<br>[0.83]    |
| Himachal Pradesh  | Iron<br>[5.53]     | Vit A<br>[2.49]    | Neonatal<br>[1.63]   | Congenital<br>[1.01] | Hemog<br>[3.97]      | Dermatitis<br>[0.49] | ID<br>[5.11]         | Skin Viral<br>[0.8]  | Conduct<br>[0.81]    | Oth Un Inf<br>[5.37] |
| Jammu & Kashmir   | Iron<br>[1.95]     | Vit A<br>[2.1]     | Neonatal<br>[1.51]   | ID<br>[6.22]         | Congenital<br>[1.09] | Dermatitis<br>[0.52] | Skin Viral<br>[0.84] | Conduct<br>[0.84]    | Hemog<br>[2.46]      | Diarrhea<br>[0.83]   |
| Jharkhand         | Iron<br>[1.8]      | Vit A<br>[1.55]    | Neonatal<br>[1.7]    | ID<br>[5.83]         | Congenital<br>[1.07] | Conduct<br>[0.98]    | Dermatitis<br>[0.51] | Hemog<br>[2.07]      | Skin Viral<br>[0.85] | Diarrhea<br>[0.81]   |
| Karnataka         | Iron<br>[1.84]     | Vit A<br>[1.92]    | Neonatal<br>[1.77]   | ID<br>[5.35]         | Congenital<br>[1.05] | Dermatitis<br>[0.52] | Skin Viral<br>[0.85] | Epilepsy<br>[0.98]   | Hemog<br>[2.36]      | Conduct<br>[0.7]     |
| Kerala            | Neonatal<br>[2.01] | Vit A<br>[2.41]    | Iron<br>[1.54]       | Congenital<br>[1.03] | Dermatitis<br>[0.48] | Skin Viral<br>[0.8]  | Conduct<br>[0.78]    | ID<br>[4.9]          | Anxiety<br>[0.78]    | Urticaria<br>[1.06]  |
| Madhya Pradesh    | Iron<br>[2.13]     | Vit A<br>[1.67]    | Neonatal<br>[1.51]   | ID<br>[6.39]         | Congenital<br>[1.07] | Hemog<br>[2.31]      | Dermatitis<br>[0.51] | Skin Viral<br>[0.85] | Conduct<br>[0.85]    | Oth NTD<br>[1.39]    |
| Maharashtra       | Iron<br>[3.24]     | Vit A<br>[2.29]    | Neonatal<br>[1.62]   | Congenital<br>[1.04] | ID<br>[5.18]         | Conduct<br>[0.86]    | Skin Viral<br>[0.81] | Dermatitis<br>[0.42] | Hemog<br>[2.79]      | Urticaria<br>[1.0]   |
| Manipur           | Neonatal<br>[1.69] | Vit A<br>[1.36]    | Iron<br>[0.7]        | ID<br>[6.81]         | Congenital<br>[1.1]  | Dermatitis<br>[0.52] | Skin Viral<br>[0.84] | Conduct<br>[0.84]    | Anxiety<br>[0.88]    | Diarrhea<br>[0.85]   |
| Meghalaya         | Iron<br>[2.3]      | Vit A<br>[2.07]    | Neonatal<br>[1.63]   | ID<br>[6.25]         | Congenital<br>[1.1]  | Dermatitis<br>[0.52] | Hemog<br>[2.61]      | Skin Viral<br>[0.85] | Conduct<br>[0.84]    | Oth NTD<br>[2.07]    |
| Mizoram           | Neonatal<br>[1.66] | Vit A<br>[1.85]    | Iron<br>[0.63]       | ID<br>[6.14]         | Congenital<br>[1.07] | Dermatitis<br>[0.51] | Skin Viral<br>[0.82] | Conduct<br>[0.82]    | Diarrhea<br>[1.05]   | Urticaria<br>[1.0]   |
| Nagaland          | Iron<br>[2.14]     | Neonatal<br>[1.72] | Vit A<br>[1.81]      | Congenital<br>[1.05] | Dermatitis<br>[0.49] | ID<br>[5.36]         | Skin Viral<br>[0.81] | Conduct<br>[0.81]    | Iodine<br>[37.31]    | Urticaria<br>[1.02]  |
| Odisha            | Vit A<br>[1.7]     | Neonatal<br>[1.48] | Iron<br>[0.73]       | ID<br>[6.39]         | Congenital<br>[1.09] | Dermatitis<br>[0.52] | Skin Viral<br>[0.85] | Conduct<br>[0.85]    | Diarrhea<br>[0.89]   | Hemog<br>[1.94]      |
| Punjab            | Iron<br>[3.8]      | Vit A<br>[2.38]    | Neonatal<br>[1.54]   | Congenital<br>[1.04] | Dermatitis<br>[0.48] | ID<br>[5.05]         | Hemog<br>[3.3]       | Conduct<br>[0.83]    | Skin Viral<br>[0.81] | Oth NTD<br>[10.2]    |
| Rajasthan         | Iron<br>[1.8]      | Vit A<br>[1.58]    | Neonatal<br>[1.48]   | ID<br>[6.0]          | Congenital<br>[1.07] | Dermatitis<br>[0.52] | Hemog<br>[2.03]      | Skin Viral<br>[0.85] | Conduct<br>[0.85]    | Oth NTD<br>[1.19]    |
| Sikkim            | Iron<br>[3.65]     | Vit A<br>[2.31]    | Neonatal<br>[1.67]   | Congenital<br>[1.02] | Dermatitis<br>[0.49] | Skin Viral<br>[0.81] | Conduct<br>[0.81]    | ID<br>[4.49]         | Hemog<br>[3.11]      | Oth NTD<br>[14.76]   |
| Tamil Nadu        | Iron<br>[3.36]     | Vit A<br>[2.4]     | Neonatal<br>[1.57]   | ID<br>[5.27]         | Dermatitis<br>[0.5]  | Hemog<br>[3.18]      | Skin Viral<br>[0.82] | Conduct<br>[0.82]    | Congenital<br>[0.86] | Urticaria<br>[0.99]  |
| Telangana         | Iron<br>[2.67]     | Vit A<br>[1.93]    | Neonatal<br>[1.65]   | ID<br>[5.31]         | Congenital<br>[1.07] | Dermatitis<br>[0.52] | Skin Viral<br>[0.84] | Hemog<br>[2.58]      | Conduct<br>[0.84]    | Oth NTD<br>[2.6]     |
| Tripura           | Iron<br>[1.76]     | Vit A<br>[2.04]    | Neonatal<br>[1.62]   | ID<br>[6.25]         | Congenital<br>[1.08] | Dermatitis<br>[0.52] | Hemog<br>[2.43]      | Skin Viral<br>[0.85] | Conduct<br>[0.85]    | Asthma<br>[0.42]     |
| Uttar Pradesh     | Iron<br>[1.66]     | Vit A<br>[1.67]    | Neonatal<br>[1.46]   | ID<br>[6.51]         | Congenital<br>[1.17] | Hemog<br>[2.18]      | Dermatitis<br>[0.5]  | Skin Viral<br>[0.85] | Conduct<br>[0.85]    | Diarrhea<br>[0.78]   |
| Uttarakhand       | Iron<br>[2.99]     | Vit A<br>[1.94]    | Neonatal<br>[1.64]   | Congenital<br>[1.06] | Dermatitis<br>[0.51] | ID<br>[4.99]         | Skin Viral<br>[0.82] | Conduct<br>[0.83]    | Hemog<br>[2.67]      | Diarrhea<br>[0.91]   |
| W Bengal          | Iron<br>[1.61]     | Vit A<br>[1.84]    | Neonatal<br>[1.5]    | ID<br>[6.74]         | Congenital<br>[1.09] | Skin Viral<br>[0.96] | Dermatitis<br>[0.52] | Conduct<br>[0.85]    | Hemog<br>[2.22]      | Anxiety<br>[0.84]    |

**eFigure 9d. Leading ten causes of YLDs with the ratio of observed YLDs to YLDs expected on the basis of Socio-Demographic Index alone in 2017, 5-9 years, both sexes combined.**  
The top ten causes contributing to YLDs are listed globally, by socio-demographic quintile, and then by GBD superregion, region, country, and subnationally where modeled. For each cell, the ratio of observed YLDs to YLDs expected on the basis of socio-demographic index (SDI) alone are listed. Abbreviations: YLD=year of life lived with disability, GBD=Global Burden of Disease.

Values shown in brackets represent the ratio of observed YLDs to predicted YLDs on the basis of Socio-Demographic Index (SDI), rounded to two (2) digits. Color ranges (shown below) were calculated to place a roughly equal number of cells into each bin.

| COLOR KEY:                             |                      | [0.0-0.8]            | [0.8-0.89]           | [0.89-0.97]          | [0.97-1.02]          | [1.02-1.1]           | [1.1-1.24]           | [1.24-1.42]          | [1.42-1.91]          | 1.91+                |
|----------------------------------------|----------------------|----------------------|----------------------|----------------------|----------------------|----------------------|----------------------|----------------------|----------------------|----------------------|
|                                        | 1                    | 2                    | 3                    | 4                    | 5                    | 6                    | 7                    | 8                    | 9                    | 10                   |
| UTs other than Delhi                   | Iron<br>[4.77]       | Vit A<br>[2.89]      | Neonatal<br>[1.75]   | Congenital<br>[1.02] | Dermatitis<br>[0.48] | Hemog<br>[3.99]      | Skin Viral<br>[0.79] | Conduct<br>[0.81]    | ID<br>[4.45]         | Urticaria<br>[1.04]  |
| Nepal                                  | Iron<br>[0.81]       | Neonatal<br>[1.9]    | Vit A<br>[0.65]      | Dermatitis<br>[0.89] | Epilepsy<br>[1.03]   | Congenital<br>[0.82] | Skin Viral<br>[0.84] | Conduct<br>[0.82]    | Headaches<br>[1.46]  | Anxiety<br>[0.96]    |
| Pakistan                               | Iron<br>[1.95]       | Neonatal<br>[1.42]   | Vit A<br>[0.8]       | Dermatitis<br>[0.86] | Diarrhea<br>[1.12]   | Epilepsy<br>[0.98]   | Skin Viral<br>[0.84] | Hemog<br>[1.88]      | Conduct<br>[0.81]    | Asthma<br>[0.47]     |
| Southeast Asia, East Asia, and Oceania | Neonatal<br>[1.06]   | Asthma<br>[0.96]     | Dermatitis<br>[0.64] | Skin Viral<br>[1.05] | Vit A<br>[0.78]      | Congenital<br>[0.89] | Conduct<br>[0.75]    | Anxiety<br>[0.74]    | Scabies<br>[3.21]    | Iron<br>[0.4]        |
| East Asia                              | Neonatal<br>[1.35]   | Asthma<br>[0.84]     | Skin Viral<br>[1.11] | Dermatitis<br>[0.52] | Hernia<br>[4.49]     | Vit A<br>[0.61]      | Anxiety<br>[0.76]    | Conduct<br>[0.67]    | Congenital<br>[0.72] | Scabies<br>[3.43]    |
| China                                  | Neonatal<br>[1.37]   | Asthma<br>[0.83]     | Skin Viral<br>[1.11] | Dermatitis<br>[0.51] | Hernia<br>[4.49]     | Vit A<br>[0.59]      | Anxiety<br>[0.76]    | Conduct<br>[0.66]    | Congenital<br>[0.71] | Scabies<br>[3.31]    |
| N Korea                                | Vit A<br>[0.58]      | Neonatal<br>[0.72]   | Asthma<br>[0.79]     | Diarrhea<br>[1.49]   | Dermatitis<br>[0.65] | Skin Viral<br>[1.16] | Anxiety<br>[1.0]     | Conduct<br>[0.77]    | Hernia<br>[4.4]      | Congenital<br>[0.75] |
| Taiwan                                 | Asthma<br>[1.92]     | Dermatitis<br>[0.6]  | Neonatal<br>[0.57]   | Skin Viral<br>[1.04] | Conduct<br>[0.81]    | Anxiety<br>[0.72]    | Diarrhea<br>[2.07]   | Congenital<br>[0.84] | Urticaria<br>[1.35]  | Scabies<br>[10.23]   |
| Oceania                                | Iron<br>[1.23]       | Asthma<br>[1.92]     | Dermatitis<br>[1.02] | Vit A<br>[0.48]      | Neonatal<br>[0.79]   | Diarrhea<br>[1.4]    | Skin Viral<br>[1.07] | Congenital<br>[0.92] | Conduct<br>[0.85]    | Blindness<br>[1.52]  |
| Am Samoa                               | Asthma<br>[2.26]     | Iron<br>[2.17]       | Dermatitis<br>[0.93] | Diarrhea<br>[2.68]   | Vit A<br>[1.25]      | Neonatal<br>[0.69]   | Skin Viral<br>[0.99] | Conduct<br>[0.8]     | Congenital<br>[0.84] | Anxiety<br>[0.77]    |
| Micronesia                             | Iron<br>[1.64]       | Vit A<br>[1.67]      | Asthma<br>[1.87]     | Dermatitis<br>[1.03] | Neonatal<br>[0.71]   | Diarrhea<br>[1.89]   | Skin Viral<br>[1.06] | Congenital<br>[0.92] | Conduct<br>[0.83]    | Anxiety<br>[0.91]    |
| Fiji                                   | Iron<br>[1.86]       | Asthma<br>[1.82]     | Dermatitis<br>[0.97] | Neonatal<br>[0.65]   | Vit A<br>[0.86]      | Diarrhea<br>[1.93]   | Skin Viral<br>[1.01] | Conduct<br>[0.8]     | Congenital<br>[0.83] | Anxiety<br>[0.84]    |
| Guam                                   | Asthma<br>[2.27]     | Diarrhea<br>[6.1]    | Iron<br>[3.91]       | Dermatitis<br>[0.87] | Neonatal<br>[0.74]   | Skin Viral<br>[0.97] | Conduct<br>[0.79]    | Congenital<br>[0.81] | Anxiety<br>[0.69]    | Vit A<br>[1.07]      |
| Kiribati                               | Iron<br>[1.28]       | Vit A<br>[0.95]      | Asthma<br>[1.91]     | Dermatitis<br>[1.02] | Neonatal<br>[0.82]   | Diarrhea<br>[1.42]   | Skin Viral<br>[1.08] | Congenital<br>[0.9]  | Conduct<br>[0.85]    | Nematode<br>[2.2]    |
| Marshall                               | Vit A<br>[1.17]      | Asthma<br>[1.74]     | Dermatitis<br>[1.04] | Iron<br>[0.57]       | Neonatal<br>[0.74]   | Diarrhea<br>[1.77]   | Skin Viral<br>[1.07] | Congenital<br>[0.93] | Conduct<br>[0.84]    | Anxiety<br>[0.94]    |
| N Mariana                              | Asthma<br>[2.35]     | Neonatal<br>[0.84]   | Dermatitis<br>[0.9]  | Diarrhea<br>[3.45]   | Vit A<br>[1.94]      | Iron<br>[1.24]       | Skin Viral<br>[0.98] | Conduct<br>[0.79]    | Congenital<br>[0.84] | Anxiety<br>[0.73]    |
| PNG                                    | Iron<br>[1.09]       | Asthma<br>[1.99]     | Dermatitis<br>[1.02] | Neonatal<br>[0.89]   | Vit A<br>[0.34]      | Diarrhea<br>[1.29]   | Skin Viral<br>[1.08] | Congenital<br>[0.91] | Conduct<br>[0.86]    | Blindness<br>[1.69]  |
| Samoa                                  | Iron<br>[1.55]       | Vit A<br>[1.34]      | Asthma<br>[1.81]     | Dermatitis<br>[1.04] | Diarrhea<br>[1.97]   | Neonatal<br>[0.73]   | Skin Viral<br>[1.06] | Congenital<br>[0.9]  | Conduct<br>[0.83]    | Anxiety<br>[0.92]    |
| Solomon                                | Iron<br>[1.62]       | Vit A<br>[0.77]      | Asthma<br>[1.84]     | Dermatitis<br>[1.02] | Neonatal<br>[0.94]   | Diarrhea<br>[1.45]   | Skin Viral<br>[1.08] | Congenital<br>[0.91] | Conduct<br>[0.85]    | Oth NTD<br>[0.91]    |
| Tonga                                  | Asthma<br>[2.42]     | Dermatitis<br>[1.0]  | Iron<br>[0.79]       | Diarrhea<br>[2.17]   | Vit A<br>[0.88]      | Neonatal<br>[0.69]   | Skin Viral<br>[1.02] | Congenital<br>[0.89] | Conduct<br>[0.81]    | Anxiety<br>[0.87]    |
| Vanuatu                                | Iron<br>[1.09]       | Vit A<br>[0.98]      | Asthma<br>[2.03]     | Dermatitis<br>[1.02] | Neonatal<br>[0.83]   | Diarrhea<br>[1.3]    | Skin Viral<br>[1.07] | Congenital<br>[0.9]  | Conduct<br>[0.85]    | Anxiety<br>[0.94]    |
| Southeast Asia                         | Asthma<br>[1.08]     | Neonatal<br>[0.72]   | Dermatitis<br>[0.82] | Vit A<br>[0.89]      | Congenital<br>[1.14] | Skin Viral<br>[0.99] | Iron<br>[0.48]       | Conduct<br>[0.87]    | Scabies<br>[2.77]    | Epilepsy<br>[0.96]   |
| Cambodia                               | Iron<br>[1.59]       | Vit A<br>[0.71]      | Dermatitis<br>[1.02] | Asthma<br>[0.95]     | Neonatal<br>[0.79]   | Congenital<br>[1.16] | Skin Viral<br>[1.06] | Conduct<br>[0.88]    | Epilepsy<br>[0.97]   | Diarrhea<br>[0.85]   |
| Indonesia                              | Asthma<br>[1.12]     | Vit A<br>[1.07]      | Neonatal<br>[0.73]   | Dermatitis<br>[0.61] | Skin Viral<br>[0.97] | Congenital<br>[1.01] | Conduct<br>[0.9]     | Scabies<br>[3.0]     | Diarrhea<br>[0.99]   | Epilepsy<br>[0.97]   |
| Laos                                   | Vit A<br>[0.99]      | Iron<br>[0.53]       | Dermatitis<br>[1.03] | Asthma<br>[1.0]      | Neonatal<br>[0.58]   | Congenital<br>[1.19] | Skin Viral<br>[1.06] | Conduct<br>[0.89]    | Anxiety<br>[1.02]    | Scabies<br>[1.85]    |
| Malaysia                               | Dermatitis<br>[0.95] | Neonatal<br>[0.81]   | Asthma<br>[0.99]     | Diarrhea<br>[2.31]   | Congenital<br>[1.12] | Skin Viral<br>[0.98] | Conduct<br>[0.84]    | Anxiety<br>[0.79]    | Iron<br>[0.81]       | Epilepsy<br>[1.17]   |
| Maldives                               | Dermatitis<br>[0.96] | Asthma<br>[1.01]     | Neonatal<br>[0.66]   | Iron<br>[0.69]       | Congenital<br>[1.1]  | Skin Viral<br>[1.0]  | Conduct<br>[0.85]    | Scabies<br>[3.21]    | Vit A<br>[0.42]      | Hearing<br>[1.81]    |
| Mauritius                              | Iron<br>[2.61]       | Asthma<br>[1.27]     | Dermatitis<br>[0.91] | Neonatal<br>[0.82]   | Diarrhea<br>[1.99]   | Skin Viral<br>[0.98] | Congenital<br>[1.09] | Conduct<br>[0.83]    | Vit A<br>[0.7]       | Epilepsy<br>[1.2]    |
| Myanmar                                | Iron<br>[0.83]       | Vit A<br>[0.82]      | Dermatitis<br>[1.04] | Congenital<br>[1.71] | Neonatal<br>[0.74]   | Asthma<br>[0.89]     | Skin Viral<br>[1.06] | Conduct<br>[0.88]    | Scabies<br>[2.05]    | Blindness<br>[1.56]  |
| Philippines                            | Asthma<br>[1.4]      | Dermatitis<br>[1.05] | Neonatal<br>[0.77]   | Vit A<br>[0.8]       | Congenital<br>[1.19] | Skin Viral<br>[1.02] | Conduct<br>[0.86]    | Scabies<br>[2.42]    | Epilepsy<br>[0.98]   | Iron<br>[0.32]       |
| Sri Lanka                              | Dermatitis<br>[0.9]  | Neonatal<br>[0.74]   | Asthma<br>[1.01]     | Vit A<br>[1.15]      | Iron<br>[1.02]       | Congenital<br>[1.31] | Skin Viral<br>[1.02] | Epilepsy<br>[1.32]   | Conduct<br>[0.83]    | Hearing<br>[1.96]    |

**eFigure 9d. Leading ten causes of YLDs with the ratio of observed YLDs to YLDs expected on the basis of Socio-Demographic Index alone in 2017, 5-9 years, both sexes combined.**  
The top ten causes contributing to YLDs are listed globally, by socio-demographic quintile, and then by GBD superregion, region, country, and subnationally where modeled. For each cell, the ratio of observed YLDs to YLDs expected on the basis of socio-demographic index (SDI) alone are listed. Abbreviations: YLD=year of life lived with disability, GBD=Global Burden of Disease.

Values shown in brackets represent the ratio of observed YLDs to predicted YLDs on the basis of Socio-Demographic Index (SDI), rounded to two (2) digits. Color ranges (shown below) were calculated to place a roughly equal number of cells into each bin.

| COLOR KEY:                        |                      | [0.0-0.8]            | [0.8-0.89]           | [0.89-0.97]          | [0.97-1.02]          | [1.02-1.1]           | [1.1-1.24]           | [1.24-1.42]          | [1.42-1.91]          | 1.91+                |
|-----------------------------------|----------------------|----------------------|----------------------|----------------------|----------------------|----------------------|----------------------|----------------------|----------------------|----------------------|
|                                   | 1                    | 2                    | 3                    | 4                    | 5                    | 6                    | 7                    | 8                    | 9                    | 10                   |
| Seychelles                        | Dermatitis<br>[0.94] | Neonatal<br>[0.81]   | Asthma<br>[1.04]     | Vit A<br>[0.8]       | Skin Viral<br>[0.99] | Congenital<br>[1.1]  | Conduct<br>[0.84]    | Iron<br>[0.52]       | Diarrhea<br>[1.2]    | Epilepsy<br>[1.11]   |
| Thailand                          | Dermatitis<br>[0.98] | Asthma<br>[0.98]     | Neonatal<br>[0.67]   | Congenital<br>[1.15] | Skin Viral<br>[0.99] | Conduct<br>[0.84]    | Scabies<br>[3.92]    | Anxiety<br>[0.7]     | Hearing<br>[1.91]    | Vit A<br>[0.47]      |
| Timor-Leste                       | Iron<br>[1.05]       | Vit A<br>[0.66]      | Dermatitis<br>[1.02] | Asthma<br>[0.94]     | Neonatal<br>[0.67]   | Congenital<br>[1.18] | Skin Viral<br>[1.06] | Conduct<br>[0.89]    | Diarrhea<br>[0.95]   | Blindness<br>[1.55]  |
| Vietnam                           | Dermatitis<br>[0.84] | Neonatal<br>[0.61]   | Asthma<br>[0.8]      | Skin Viral<br>[1.04] | Congenital<br>[1.06] | Vit A<br>[0.5]       | Conduct<br>[0.87]    | Iron<br>[0.31]       | Diarrhea<br>[0.89]   | Scabies<br>[2.09]    |
| <b>Sub-Saharan Africa</b>         | Iron<br>[1.43]       | Vit A<br>[1.22]      | Dermatitis<br>[1.0]  | Neonatal<br>[0.99]   | Asthma<br>[0.82]     | Congenital<br>[1.17] | Epilepsy<br>[1.19]   | Malaria<br>[9.81]    | Skin Viral<br>[0.96] | Conduct<br>[0.94]    |
| <b>Central Sub-Saharan Africa</b> | Iron<br>[1.51]       | Vit A<br>[1.34]      | Dermatitis<br>[1.16] | Neonatal<br>[1.04]   | Asthma<br>[0.99]     | Malaria<br>[17.57]   | Oncho<br>[203.01]    | Epilepsy<br>[1.59]   | Hemog<br>[2.15]      | Congenital<br>[1.02] |
| Angola                            | Iron<br>[1.97]       | Vit A<br>[1.16]      | Neonatal<br>[1.21]   | Dermatitis<br>[1.16] | Asthma<br>[1.17]     | Epilepsy<br>[1.71]   | Diarrhea<br>[1.18]   | Congenital<br>[1.08] | Hemog<br>[2.09]      | Conduct<br>[0.93]    |
| C African Rep                     | Iron<br>[1.66]       | Vit A<br>[1.06]      | Malaria<br>[3.33]    | Dermatitis<br>[1.16] | Asthma<br>[1.11]     | Epilepsy<br>[1.46]   | Neonatal<br>[1.05]   | Diarrhea<br>[1.13]   | Oncho<br>[61.24]     | Hemog<br>[1.68]      |
| Congo                             | Iron<br>[2.16]       | Vit A<br>[2.43]      | Neonatal<br>[1.13]   | Asthma<br>[1.28]     | Dermatitis<br>[1.17] | Epilepsy<br>[1.99]   | Malaria<br>[118.46]  | Diarrhea<br>[1.19]   | Congenital<br>[0.98] | Conduct<br>[0.92]    |
| Congo DR                          | Iron<br>[1.07]       | Vit A<br>[1.03]      | Oncho<br>[144.34]    | Dermatitis<br>[1.16] | Neonatal<br>[1.21]   | Malaria<br>[4.25]    | Asthma<br>[0.95]     | Epilepsy<br>[1.43]   | Hemog<br>[1.76]      | Congenital<br>[0.98] |
| Eq Guinea                         | Iron<br>[1.59]       | Vit A<br>[1.3]       | Dermatitis<br>[1.12] | Asthma<br>[1.14]     | Neonatal<br>[0.73]   | Epilepsy<br>[2.15]   | Malaria<br>[258.23]  | Diarrhea<br>[1.35]   | Conduct<br>[0.93]    | Skin Viral<br>[0.85] |
| Gabon                             | Iron<br>[5.13]       | Vit A<br>[2.23]      | Neonatal<br>[1.22]   | Dermatitis<br>[1.1]  | Asthma<br>[1.22]     | Epilepsy<br>[2.25]   | Malaria<br>[469.95]  | Oth NTD<br>[49.58]   | Conduct<br>[0.87]    | Diarrhea<br>[1.27]   |
| <b>Eastern Sub-Saharan Africa</b> | Vit A<br>[0.89]      | Iron<br>[0.79]       | Neonatal<br>[1.46]   | Dermatitis<br>[1.06] | Asthma<br>[1.01]     | Congenital<br>[1.19] | Epilepsy<br>[1.13]   | Skin Viral<br>[1.07] | Conduct<br>[0.96]    | Diarrhea<br>[0.88]   |
| Burundi                           | Iron<br>[0.61]       | Vit A<br>[0.43]      | Dermatitis<br>[1.18] | Neonatal<br>[1.17]   | Asthma<br>[1.0]      | Epilepsy<br>[1.18]   | Congenital<br>[1.09] | Skin Viral<br>[1.03] | Diarrhea<br>[0.89]   | Conduct<br>[0.94]    |
| Comoros                           | Iron<br>[1.39]       | Vit A<br>[0.87]      | Neonatal<br>[1.61]   | Dermatitis<br>[1.16] | Asthma<br>[1.09]     | Epilepsy<br>[1.17]   | Congenital<br>[1.05] | Skin Viral<br>[0.99] | Conduct<br>[0.92]    | Diarrhea<br>[0.89]   |
| Djibouti                          | Iron<br>[0.69]       | Neonatal<br>[1.35]   | Dermatitis<br>[1.16] | Asthma<br>[0.92]     | Epilepsy<br>[1.29]   | Congenital<br>[0.32] | Congenital<br>[1.06] | Skin Viral<br>[0.99] | Conduct<br>[0.95]    | Anxiety<br>[0.96]    |
| Eritrea                           | Iron<br>[1.37]       | Vit A<br>[0.74]      | Neonatal<br>[1.64]   | Dermatitis<br>[1.16] | Asthma<br>[0.88]     | Epilepsy<br>[1.19]   | Congenital<br>[1.06] | Skin Viral<br>[1.0]  | Diarrhea<br>[0.97]   | Conduct<br>[0.93]    |
| Ethiopia                          | Vit A<br>[0.97]      | Iron<br>[0.6]        | Neonatal<br>[1.77]   | Dermatitis<br>[1.05] | Asthma<br>[0.94]     | Skin Viral<br>[1.28] | Congenital<br>[1.07] | Conduct<br>[1.0]     | Diarrhea<br>[0.88]   | Epilepsy<br>[0.83]   |
| Kenya                             | Neonatal<br>[1.73]   | Vit A<br>[1.02]      | Dermatitis<br>[1.15] | Congenital<br>[1.61] | Asthma<br>[0.76]     | Iron<br>[0.3]        | Skin Viral<br>[0.98] | Conduct<br>[0.98]    | Epilepsy<br>[1.1]    | Diarrhea<br>[1.0]    |
| Baringo                           | Vit A<br>[0.95]      | Neonatal<br>[1.88]   | Dermatitis<br>[1.12] | Congenital<br>[1.58] | Asthma<br>[0.77]     | Diarrhea<br>[1.05]   | Skin Viral<br>[0.99] | Conduct<br>[0.99]    | Epilepsy<br>[0.95]   | Iron<br>[0.17]       |
| Bomet                             | Neonatal<br>[2.03]   | Vit A<br>[0.68]      | Dermatitis<br>[1.12] | Congenital<br>[1.58] | Asthma<br>[0.79]     | Skin Viral<br>[0.98] | Conduct<br>[0.98]    | Diarrhea<br>[0.97]   | Epilepsy<br>[0.99]   | HIV<br>[103.16]      |
| Bungoma                           | Vit A<br>[1.31]      | Neonatal<br>[1.89]   | Iron<br>[0.52]       | Dermatitis<br>[1.12] | Congenital<br>[1.58] | Asthma<br>[0.77]     | Skin Viral<br>[0.98] | Conduct<br>[0.97]    | Epilepsy<br>[0.97]   | Diarrhea<br>[0.88]   |
| Busia                             | Vit A<br>[1.16]      | Neonatal<br>[1.89]   | Dermatitis<br>[1.12] | Iron<br>[0.39]       | Congenital<br>[1.57] | Asthma<br>[0.75]     | Malaria<br>[9.7]     | Skin Viral<br>[0.99] | Conduct<br>[0.97]    | Diarrhea<br>[0.96]   |
| Elgeyo-Marakwet                   | Neonatal<br>[2.01]   | Dermatitis<br>[1.13] | Vit A<br>[0.62]      | Congenital<br>[1.59] | Asthma<br>[0.76]     | Skin Viral<br>[0.98] | Conduct<br>[0.98]    | Epilepsy<br>[1.1]    | Diarrhea<br>[0.99]   | Anxiety<br>[0.95]    |
| Embu                              | Vit A<br>[1.51]      | Neonatal<br>[1.87]   | Iron<br>[0.62]       | Dermatitis<br>[1.13] | Congenital<br>[1.59] | Asthma<br>[0.76]     | Skin Viral<br>[0.98] | Conduct<br>[0.97]    | Epilepsy<br>[1.16]   | Diarrhea<br>[1.04]   |
| Garissa                           | Neonatal<br>[2.59]   | Vit A<br>[0.58]      | Dermatitis<br>[1.13] | Congenital<br>[1.59] | Asthma<br>[0.84]     | Skin Viral<br>[1.02] | Conduct<br>[1.02]    | Epilepsy<br>[0.94]   | Diarrhea<br>[0.71]   | Anxiety<br>[0.99]    |
| HomaBay                           | Vit A<br>[1.34]      | Iron<br>[0.65]       | Dermatitis<br>[1.11] | Neonatal<br>[1.14]   | Congenital<br>[1.59] | HIV<br>[115.51]      | Asthma<br>[0.79]     | Diarrhea<br>[1.12]   | Epilepsy<br>[1.08]   | Skin Viral<br>[0.99] |
| Isiolo                            | Vit A<br>[0.73]      | Neonatal<br>[1.76]   | Dermatitis<br>[1.12] | Congenital<br>[1.58] | Asthma<br>[0.78]     | Skin Viral<br>[1.0]  | Conduct<br>[1.0]     | Diarrhea<br>[0.93]   | Epilepsy<br>[0.95]   | Anxiety<br>[0.98]    |
| Kajiado                           | Neonatal<br>[2.03]   | Vit A<br>[0.89]      | Dermatitis<br>[1.13] | Congenital<br>[1.62] | Asthma<br>[0.77]     | Epilepsy<br>[1.23]   | Skin Viral<br>[0.98] | Conduct<br>[0.98]    | Anxiety<br>[0.95]    | Diarrhea<br>[0.87]   |
| Kakamega                          | Vit A<br>[1.28]      | Neonatal<br>[1.61]   | Dermatitis<br>[1.12] | Iron<br>[0.41]       | Congenital<br>[1.58] | Asthma<br>[0.78]     | Diarrhea<br>[1.06]   | Skin Viral<br>[0.99] | Conduct<br>[0.98]    | Epilepsy<br>[1.01]   |
| Kericho                           | Neonatal<br>[2.14]   | Vit A<br>[0.91]      | Dermatitis<br>[1.12] | Congenital<br>[1.61] | Asthma<br>[0.78]     | Skin Viral<br>[0.98] | Conduct<br>[0.98]    | Diarrhea<br>[1.03]   | Epilepsy<br>[1.04]   | Anxiety<br>[0.95]    |

**eFigure 9d. Leading ten causes of YLDs with the ratio of observed YLDs to YLDs expected on the basis of Socio-Demographic Index alone in 2017, 5-9 years, both sexes combined.**  
The top ten causes contributing to YLDs are listed globally, by socio-demographic quintile, and then by GBD superregion, region, country, and subnationally where modeled. For each cell, the ratio of observed YLDs to YLDs expected on the basis of socio-demographic index (SDI) alone are listed. Abbreviations: YLD=year of life lived with disability, GBD=Global Burden of Disease.

Values shown in brackets represent the ratio of observed YLDs to predicted YLDs on the basis of Socio-Demographic Index (SDI), rounded to two (2) digits. Color ranges (shown below) were calculated to place a roughly equal number of cells into each bin.

| COLOR KEY:   |                    | [0.0-0.8]            | [0.8-0.89]           | [0.89-0.97]          | [0.97-1.02]          | [1.02-1.1]           | [1.1-1.24]           | [1.24-1.42]          | [1.42-1.91]          | 1.91+                          |
|--------------|--------------------|----------------------|----------------------|----------------------|----------------------|----------------------|----------------------|----------------------|----------------------|--------------------------------|
|              | 1                  | 2                    | 3                    | 4                    | 5                    | 6                    | 7                    | 8                    | 9                    | 10                             |
| Kiambu       | Neonatal<br>[1.93] | Dermatitis<br>[1.14] | Vit A<br>[0.68]      | Congenital<br>[1.62] | Asthma<br>[0.77]     | Epilepsy<br>[1.29]   | Skin Viral<br>[0.98] | Conduct<br>[0.97]    | Diarrhea<br>[0.94]   | Anxiety<br>[0.92]              |
| Kilifi       | Vit A<br>[0.99]    | Neonatal<br>[1.79]   | Iron<br>[0.61]       | Dermatitis<br>[1.12] | Congenital<br>[1.57] | Asthma<br>[0.72]     | Skin Viral<br>[0.98] | Conduct<br>[0.98]    | Epilepsy<br>[0.97]   | Diarrhea<br>[0.92]             |
| Kirinyaga    | Neonatal<br>[1.94] | Dermatitis<br>[1.14] | Congenital<br>[1.62] | Asthma<br>[0.77]     | Vit A<br>[0.47]      | Diarrhea<br>[1.15]   | Skin Viral<br>[0.98] | Epilepsy<br>[1.18]   | Conduct<br>[0.98]    | Anxiety<br>[0.94]              |
| Kisii        | Neonatal<br>[1.56] | Dermatitis<br>[1.13] | Vit A<br>[0.7]       | Congenital<br>[1.61] | Asthma<br>[0.75]     | Skin Viral<br>[0.98] | Conduct<br>[0.98]    | Diarrhea<br>[1.06]   | Epilepsy<br>[1.1]    | Anxiety<br>[0.95]              |
| Kisumu       | Vit A<br>[1.21]    | Neonatal<br>[1.1]    | Iron<br>[0.5]        | Dermatitis<br>[0.94] | Congenital<br>[1.61] | Asthma<br>[0.76]     | Epilepsy<br>[1.19]   | Skin Viral<br>[0.98] | Conduct<br>[0.97]    | Diarrhea<br>[0.99]             |
| Kitui        | Neonatal<br>[2.15] | Dermatitis<br>[1.12] | Congenital<br>[1.58] | Vit A<br>[0.39]      | Asthma<br>[0.75]     | Skin Viral<br>[0.99] | Conduct<br>[0.99]    | Diarrhea<br>[1.03]   | Epilepsy<br>[1.02]   | Anxiety<br>[0.97]              |
| Kwale        | Vit A<br>[0.95]    | Neonatal<br>[1.84]   | Dermatitis<br>[1.12] | Iron<br>[0.36]       | Congenital<br>[1.57] | Asthma<br>[0.75]     | Skin Viral<br>[0.98] | Conduct<br>[0.98]    | Epilepsy<br>[1.05]   | Diarrhea<br>[0.89]             |
| Laikipia     | Neonatal<br>[2.01] | Vit A<br>[0.94]      | Dermatitis<br>[1.14] | Congenital<br>[1.61] | Asthma<br>[0.82]     | Skin Viral<br>[0.98] | Conduct<br>[0.98]    | Iron<br>[0.29]       | Epilepsy<br>[1.16]   | Diarrhea<br>[1.02]             |
| Lamu         | Neonatal<br>[1.6]  | Vit A<br>[0.72]      | Dermatitis<br>[1.12] | Congenital<br>[1.57] | Asthma<br>[0.76]     | Epilepsy<br>[1.11]   | Skin Viral<br>[0.99] | Conduct<br>[0.99]    | Diarrhea<br>[0.95]   | Conflict<br>Terror<br>[336.32] |
| Machakos     | Neonatal<br>[1.95] | Dermatitis<br>[1.13] | Vit A<br>[0.66]      | Congenital<br>[1.59] | Asthma<br>[0.76]     | Skin Viral<br>[0.98] | Conduct<br>[0.98]    | Epilepsy<br>[1.13]   | Diarrhea<br>[1.01]   | Anxiety<br>[0.94]              |
| Makueni      | Neonatal<br>[2.0]  | Dermatitis<br>[1.12] | Vit A<br>[0.57]      | Congenital<br>[1.58] | Asthma<br>[0.77]     | HIV<br>[115.12]      | Skin Viral<br>[0.98] | Conduct<br>[0.98]    | Epilepsy<br>[1.02]   | Diarrhea<br>[0.87]             |
| Mandera      | Vit A<br>[0.87]    | Iron<br>[0.55]       | Neonatal<br>[2.19]   | Dermatitis<br>[1.12] | Congenital<br>[1.57] | Asthma<br>[0.79]     | Skin Viral<br>[1.02] | Conduct<br>[1.01]    | Epilepsy<br>[0.85]   | Diarrhea<br>[0.74]             |
| Marsabit     | Neonatal<br>[2.69] | Vit A<br>[0.59]      | Dermatitis<br>[1.13] | Congenital<br>[1.58] | Asthma<br>[0.77]     | Skin Viral<br>[1.02] | Conduct<br>[1.01]    | Diarrhea<br>[0.85]   | Epilepsy<br>[0.89]   | Anxiety<br>[0.99]              |
| Meru         | Neonatal<br>[1.94] | Vit A<br>[0.85]      | Dermatitis<br>[1.13] | Congenital<br>[1.61] | Asthma<br>[0.77]     | Diarrhea<br>[1.13]   | Skin Viral<br>[0.98] | Conduct<br>[0.98]    | Epilepsy<br>[1.11]   | Anxiety<br>[0.95]              |
| Migori       | Vit A<br>[0.98]    | Dermatitis<br>[1.12] | Neonatal<br>[1.06]   | Iron<br>[0.33]       | Congenital<br>[1.58] | Asthma<br>[0.79]     | HIV<br>[83.32]       | Diarrhea<br>[1.06]   | Skin Viral<br>[0.99] | Epilepsy<br>[1.04]             |
| Mombasa      | Neonatal<br>[1.57] | Dermatitis<br>[1.14] | Vit A<br>[0.86]      | Congenital<br>[1.62] | Asthma<br>[0.74]     | Epilepsy<br>[1.29]   | Skin Viral<br>[0.98] | Conduct<br>[0.97]    | Diarrhea<br>[1.05]   | Iron<br>[0.28]                 |
| Murang'a     | Neonatal<br>[1.95] | Dermatitis<br>[1.13] | Congenital<br>[1.62] | Vit A<br>[0.52]      | Asthma<br>[0.77]     | Skin Viral<br>[0.98] | Conduct<br>[0.98]    | Diarrhea<br>[1.09]   | Epilepsy<br>[1.11]   | Anxiety<br>[0.94]              |
| Nairobi      | Neonatal<br>[1.73] | Dermatitis<br>[1.37] | Vit A<br>[1.24]      | Congenital<br>[1.51] | Asthma<br>[0.81]     | Epilepsy<br>[1.61]   | Skin Viral<br>[0.91] | Conduct<br>[0.92]    | Iron<br>[0.5]        | Anxiety<br>[0.81]              |
| Nakuru       | Neonatal<br>[1.82] | Dermatitis<br>[1.14] | Vit A<br>[0.7]       | Congenital<br>[1.64] | Epilepsy<br>[1.71]   | Asthma<br>[0.81]     | Skin Viral<br>[0.98] | Diarrhea<br>[1.14]   | Conduct<br>[0.98]    | Anxiety<br>[0.95]              |
| Nandi        | Neonatal<br>[2.05] | Vit A<br>[0.88]      | Dermatitis<br>[1.12] | Congenital<br>[1.6]  | Asthma<br>[0.78]     | Iron<br>[0.26]       | Skin Viral<br>[0.98] | Conduct<br>[0.98]    | Epilepsy<br>[1.07]   | Diarrhea<br>[0.94]             |
| Narok        | Vit A<br>[0.9]     | Neonatal<br>[2.59]   | Dermatitis<br>[1.12] | Congenital<br>[1.58] | Asthma<br>[0.83]     | Skin Viral<br>[1.0]  | Conduct<br>[1.0]     | Diarrhea<br>[0.95]   | Epilepsy<br>[0.99]   | Iron<br>[0.18]                 |
| Nyamira      | Neonatal<br>[1.77] | Dermatitis<br>[1.14] | Congenital<br>[1.63] | Vit A<br>[0.53]      | Asthma<br>[0.77]     | Epilepsy<br>[1.31]   | Diarrhea<br>[1.23]   | Skin Viral<br>[0.98] | Conduct<br>[0.99]    | Anxiety<br>[0.94]              |
| Nyandarua    | Neonatal<br>[2.06] | Vit A<br>[0.82]      | Dermatitis<br>[1.14] | Congenital<br>[1.63] | Asthma<br>[0.78]     | Iron<br>[0.33]       | Epilepsy<br>[1.31]   | Skin Viral<br>[0.98] | Conduct<br>[0.98]    | Diarrhea<br>[1.01]             |
| Nyeri        | Neonatal<br>[1.92] | Dermatitis<br>[1.14] | Congenital<br>[1.64] | Asthma<br>[0.77]     | Vit A<br>[0.48]      | Epilepsy<br>[1.3]    | Skin Viral<br>[0.98] | Conduct<br>[0.98]    | Diarrhea<br>[0.97]   | Anxiety<br>[0.94]              |
| Samburu      | Neonatal<br>[3.02] | Vit A<br>[0.35]      | Dermatitis<br>[1.13] | Congenital<br>[1.59] | Asthma<br>[0.84]     | Diarrhea<br>[0.95]   | Skin Viral<br>[1.03] | Conduct<br>[1.01]    | Epilepsy<br>[0.82]   | Anxiety<br>[1.0]               |
| Siaya        | Vit A<br>[0.87]    | Neonatal<br>[1.22]   | Dermatitis<br>[1.12] | Congenital<br>[1.59] | Asthma<br>[0.82]     | Skin Viral<br>[0.99] | Conduct<br>[0.98]    | Diarrhea<br>[1.01]   | Epilepsy<br>[0.97]   | Malaria<br>[10.19]             |
| TaitaTaveta  | Neonatal<br>[1.79] | Dermatitis<br>[1.14] | Congenital<br>[1.61] | Asthma<br>[0.75]     | Epilepsy<br>[1.29]   | Skin Viral<br>[0.98] | Conduct<br>[0.98]    | Vit A<br>[0.34]      | Diarrhea<br>[1.0]    | Anxiety<br>[0.94]              |
| TanaRiver    | Vit A<br>[1.31]    | Iron<br>[1.08]       | Neonatal<br>[2.16]   | Dermatitis<br>[1.11] | Congenital<br>[1.58] | Asthma<br>[0.75]     | Skin Viral<br>[1.0]  | Epilepsy<br>[1.0]    | Conduct<br>[0.98]    | Hemog<br>[1.58]                |
| TharakaNithi | Neonatal<br>[1.52] | Dermatitis<br>[1.13] | Vit A<br>[0.64]      | Congenital<br>[1.59] | Asthma<br>[0.76]     | Epilepsy<br>[1.22]   | Skin Viral<br>[0.98] | Conduct<br>[0.98]    | Diarrhea<br>[1.0]    | Anxiety<br>[0.95]              |
| TransNzoia   | Neonatal<br>[1.95] | Vit A<br>[1.0]       | Dermatitis<br>[1.12] | Congenital<br>[1.58] | Asthma<br>[0.77]     | Diarrhea<br>[1.16]   | Skin Viral<br>[0.98] | Conduct<br>[0.98]    | Epilepsy<br>[1.01]   | Anxiety<br>[0.94]              |
| Turkana      | Vit A<br>[0.7]     | Neonatal<br>[2.63]   | Dermatitis<br>[1.12] | Congenital<br>[1.6]  | Iron<br>[0.25]       | Asthma<br>[0.79]     | Diarrhea<br>[0.98]   | Skin Viral<br>[1.02] | Conduct<br>[1.01]    | HIV<br>[28.79]                 |

**eFigure 9d. Leading ten causes of YLDs with the ratio of observed YLDs to YLDs expected on the basis of Socio-Demographic Index alone in 2017, 5-9 years, both sexes combined.**  
The top ten causes contributing to YLDs are listed globally, by socio-demographic quintile, and then by GBD superregion, region, country, and subnationally where modeled. For each cell, the ratio of observed YLDs to YLDs expected on the basis of socio-demographic index (SDI) alone are listed. Abbreviations: YLD=year of life lived with disability, GBD=Global Burden of Disease.

Values shown in brackets represent the ratio of observed YLDs to predicted YLDs on the basis of Socio-Demographic Index (SDI), rounded to two (2) digits. Color ranges (shown below) were calculated to place a roughly equal number of cells into each bin.

| COLOR KEY:                         |                    | [0.0-0.8]            | [0.8-0.89]           | [0.89-0.97]          | [0.97-1.02]          | [1.02-1.1]           | [1.1-1.24]           | [1.24-1.42]          | [1.42-1.91]          | 1.91+                |
|------------------------------------|--------------------|----------------------|----------------------|----------------------|----------------------|----------------------|----------------------|----------------------|----------------------|----------------------|
|                                    | 1                  | 2                    | 3                    | 4                    | 5                    | 6                    | 7                    | 8                    | 9                    | 10                   |
| UasinGishu                         | Neonatal<br>[1.83] | Dermatitis<br>[1.66] | Vit A<br>[0.96]      | Congenital<br>[1.6]  | Asthma<br>[0.78]     | Skin Viral<br>[0.98] | Conduct<br>[0.98]    | Diarrhea<br>[1.09]   | Epilepsy<br>[1.13]   | Anxiety<br>[0.94]    |
| Vihiga                             | Vit A<br>[1.05]    | Neonatal<br>[1.84]   | Dermatitis<br>[1.12] | Congenital<br>[1.59] | Iron<br>[0.36]       | Asthma<br>[0.77]     | Diarrhea<br>[1.09]   | Skin Viral<br>[0.98] | Epilepsy<br>[1.09]   | Conduct<br>[0.98]    |
| Wajir                              | Neonatal<br>[2.97] | Vit A<br>[0.41]      | Dermatitis<br>[1.12] | Congenital<br>[1.6]  | Asthma<br>[0.81]     | Skin Viral<br>[1.03] | Conduct<br>[1.02]    | Diarrhea<br>[0.76]   | Epilepsy<br>[0.76]   | Anxiety<br>[0.99]    |
| WestPokot                          | Neonatal<br>[2.49] | Vit A<br>[0.62]      | Dermatitis<br>[1.12] | Congenital<br>[1.58] | Asthma<br>[0.8]      | Diarrhea<br>[0.99]   | Skin Viral<br>[1.01] | Conduct<br>[1.0]     | Epilepsy<br>[0.87]   | Anxiety<br>[0.99]    |
| Madagascar                         | Iron<br>[0.96]     | Vit A<br>[0.71]      | Congenital<br>[2.69] | Dermatitis<br>[1.17] | Neonatal<br>[1.52]   | Asthma<br>[1.11]     | Epilepsy<br>[1.23]   | Diarrhea<br>[1.0]    | Hearing<br>[1.89]    | Skin Viral<br>[1.02] |
| Malawi                             | Iron<br>[1.16]     | Vit A<br>[0.86]      | Dermatitis<br>[1.17] | Neonatal<br>[1.33]   | HIV<br>[77.0]        | Asthma<br>[1.0]      | Congenital<br>[1.09] | Epilepsy<br>[1.1]    | Malaria<br>[1.86]    | Diarrhea<br>[0.96]   |
| Mozambique                         | Iron<br>[1.06]     | Vit A<br>[0.87]      | HIV<br>[84.89]       | Neonatal<br>[1.27]   | Dermatitis<br>[0.93] | Asthma<br>[1.02]     | Malaria<br>[2.3]     | Epilepsy<br>[1.41]   | Congenital<br>[1.06] | Skin Viral<br>[1.02] |
| Rwanda                             | Iron<br>[0.78]     | Vit A<br>[0.75]      | Neonatal<br>[1.34]   | Asthma<br>[1.36]     | Dermatitis<br>[0.75] | Epilepsy<br>[1.22]   | Congenital<br>[1.07] | Skin Viral<br>[1.01] | Conduct<br>[0.93]    | Anxiety<br>[1.0]     |
| Somalia                            | Vit A<br>[0.81]    | Iron<br>[0.72]       | Dermatitis<br>[1.16] | Neonatal<br>[1.76]   | Asthma<br>[0.95]     | Congenital<br>[1.06] | Epilepsy<br>[1.0]    | Skin Viral<br>[1.04] | Conduct<br>[0.95]    | Diarrhea<br>[0.75]   |
| S Sudan                            | Iron<br>[0.89]     | Vit A<br>[0.62]      | Oncho<br>[91.03]     | Dermatitis<br>[1.16] | Neonatal<br>[1.51]   | Asthma<br>[1.12]     | Diarrhea<br>[1.15]   | Congenital<br>[1.03] | Epilepsy<br>[1.02]   | Skin Viral<br>[1.03] |
| Tanzania                           | Iron<br>[1.17]     | Vit A<br>[0.75]      | Neonatal<br>[1.28]   | Asthma<br>[1.31]     | Dermatitis<br>[0.93] | Epilepsy<br>[1.15]   | Skin Viral<br>[0.94] | Conduct<br>[0.93]    | Congenital<br>[0.87] | Anxiety<br>[0.99]    |
| Uganda                             | Vit A<br>[0.73]    | Iron<br>[0.67]       | Neonatal<br>[1.31]   | Dermatitis<br>[1.07] | Asthma<br>[1.12]     | Malaria<br>[5.22]    | Epilepsy<br>[1.43]   | Skin Viral<br>[1.01] | HIV<br>[58.19]       | Conduct<br>[0.94]    |
| Zambia                             | Vit A<br>[1.5]     | Iron<br>[0.77]       | Dermatitis<br>[1.16] | Neonatal<br>[1.04]   | Asthma<br>[0.81]     | Epilepsy<br>[1.47]   | Congenital<br>[1.06] | Malaria<br>[15.52]   | Skin Viral<br>[0.99] | HIV<br>[98.74]       |
| <b>Southern Sub-Saharan Africa</b> | Vit A<br>[1.77]    | Dermatitis<br>[1.31] | Neonatal<br>[1.02]   | Iron<br>[1.16]       | Congenital<br>[1.22] | Conduct<br>[0.93]    | HIV<br>[334.16]      | Skin Viral<br>[0.85] | Anxiety<br>[0.9]     | Epilepsy<br>[0.99]   |
| Botswana                           | Vit A<br>[2.36]    | Iron<br>[2.06]       | Neonatal<br>[1.26]   | Dermatitis<br>[1.3]  | Asthma<br>[0.63]     | Conduct<br>[0.89]    | Skin Viral<br>[0.85] | Congenital<br>[0.83] | Diarrhea<br>[1.15]   | Anxiety<br>[0.85]    |
| Lesotho                            | Vit A<br>[1.5]     | Iron<br>[1.06]       | Dermatitis<br>[1.39] | Neonatal<br>[0.93]   | HIV<br>[194.7]       | Conduct<br>[0.94]    | Skin Viral<br>[0.9]  | Congenital<br>[0.9]  | Diarrhea<br>[0.94]   | Epilepsy<br>[0.91]   |
| Namibia                            | Iron<br>[1.71]     | Dermatitis<br>[1.36] | Neonatal<br>[1.07]   | Vit A<br>[1.09]      | Conduct<br>[0.9]     | HIV<br>[276.29]      | Diarrhea<br>[1.18]   | Skin Viral<br>[0.87] | Asthma<br>[0.53]     | Congenital<br>[0.85] |
| S Africa                           | Vit A<br>[1.89]    | Dermatitis<br>[1.27] | Neonatal<br>[1.05]   | Iron<br>[0.96]       | Congenital<br>[1.45] | Conduct<br>[0.94]    | HIV<br>[448.8]       | Skin Viral<br>[0.84] | Anxiety<br>[0.91]    | Epilepsy<br>[1.06]   |
| Swaziland                          | Iron<br>[1.65]     | Vit A<br>[1.75]      | Dermatitis<br>[1.4]  | Neonatal<br>[0.84]   | HIV<br>[439.91]      | Asthma<br>[0.65]     | Conduct<br>[0.93]    | Diarrhea<br>[1.14]   | Skin Viral<br>[0.9]  | Congenital<br>[0.88] |
| Zimbabwe                           | Iron<br>[0.82]     | Vit A<br>[0.96]      | Dermatitis<br>[1.39] | Neonatal<br>[1.15]   | Conduct<br>[0.94]    | Skin Viral<br>[0.91] | Diarrhea<br>[0.96]   | HIV<br>[83.37]       | Asthma<br>[0.46]     | Congenital<br>[0.75] |
| <b>Western Sub-Saharan Africa</b>  | Iron<br>[1.97]     | Vit A<br>[1.35]      | Dermatitis<br>[0.85] | Malaria<br>[12.13]   | Hemog<br>[2.51]      | Neonatal<br>[0.69]   | Congenital<br>[1.17] | Asthma<br>[0.68]     | Epilepsy<br>[1.14]   | Diarrhea<br>[0.96]   |
| Benin                              | Vit A<br>[1.13]    | Iron<br>[1.03]       | Malaria<br>[5.49]    | Neonatal<br>[1.18]   | Dermatitis<br>[0.95] | Epilepsy<br>[1.24]   | Asthma<br>[0.75]     | Hemog<br>[1.66]      | Congenital<br>[0.97] | Conduct<br>[0.95]    |
| Burkina Faso                       | Iron<br>[1.6]      | Vit A<br>[0.97]      | Malaria<br>[1.76]    | Dermatitis<br>[0.95] | Asthma<br>[0.94]     | Hemog<br>[1.75]      | Diarrhea<br>[1.05]   | Neonatal<br>[0.96]   | Epilepsy<br>[1.02]   | Congenital<br>[0.96] |
| Cameroon                           | Iron<br>[1.55]     | Vit A<br>[1.57]      | Dermatitis<br>[0.91] | Malaria<br>[28.93]   | Neonatal<br>[0.65]   | Epilepsy<br>[1.38]   | Diarrhea<br>[1.3]    | Asthma<br>[0.68]     | Oncho<br>[182.69]    | Congenital<br>[1.01] |
| Cape Verde                         | Iron<br>[1.64]     | Neonatal<br>[1.41]   | Dermatitis<br>[0.97] | Asthma<br>[0.73]     | Diarrhea<br>[1.29]   | Epilepsy<br>[1.34]   | Conduct<br>[0.94]    | Congenital<br>[0.97] | Skin Viral<br>[0.91] | Anxiety<br>[0.91]    |
| Chad                               | Iron<br>[1.92]     | Vit A<br>[0.88]      | Dermatitis<br>[0.94] | Diarrhea<br>[1.16]   | Oth NTD<br>[0.79]    | Epilepsy<br>[0.98]   | Asthma<br>[0.72]     | Congenital<br>[0.93] | Malaria<br>[0.66]    | Neonatal<br>[0.81]   |
| Cote d'Ivoire                      | Iron<br>[1.58]     | Vit A<br>[1.34]      | Dermatitis<br>[0.94] | Neonatal<br>[0.86]   | Hemog<br>[2.32]      | Asthma<br>[0.81]     | Epilepsy<br>[1.27]   | Diarrhea<br>[1.16]   | Congenital<br>[1.0]  | Malaria<br>[5.08]    |
| Gambia                             | Iron<br>[1.52]     | Vit A<br>[1.4]       | Neonatal<br>[1.64]   | Dermatitis<br>[0.95] | Diarrhea<br>[1.17]   | Asthma<br>[0.71]     | Hemog<br>[1.72]      | Congenital<br>[0.95] | Conduct<br>[0.94]    | Skin Viral<br>[0.91] |
| Ghana                              | Iron<br>[2.18]     | Vit A<br>[2.23]      | Neonatal<br>[0.99]   | Epilepsy<br>[1.44]   | Malaria<br>[67.67]   | Diarrhea<br>[1.19]   | Dermatitis<br>[0.54] | Congenital<br>[1.01] | Asthma<br>[0.55]     | Hemog<br>[2.44]      |
| Guinea                             | Iron<br>[1.16]     | Vit A<br>[0.93]      | Malaria<br>[2.44]    | Dermatitis<br>[0.95] | Asthma<br>[0.94]     | Hemog<br>[1.87]      | Neonatal<br>[0.97]   | Epilepsy<br>[1.06]   | Diarrhea<br>[0.95]   | Congenital<br>[0.97] |
| Guinea-Bissau                      | Iron<br>[1.33]     | Vit A<br>[1.13]      | Dermatitis<br>[0.95] | Neonatal<br>[1.21]   | Epilepsy<br>[1.2]    | Asthma<br>[0.73]     | Congenital<br>[1.03] | LF<br>[11.78]        | Conduct<br>[0.95]    | Skin Viral<br>[0.93] |

**eFigure 9d. Leading ten causes of YLDs with the ratio of observed YLDs to YLDs expected on the basis of Socio-Demographic Index alone in 2017, 5-9 years, both sexes combined.**  
 The top ten causes contributing to YLDs are listed globally, by socio-demographic quintile, and then by GBD superregion, region, country, and subnationally where modeled. For each cell, the ratio of observed YLDs to YLDs expected on the basis of socio-demographic index (SDI) alone are listed. Abbreviations: YLD=year of life lived with disability, GBD=Global Burden of Disease.

Values shown in brackets represent the ratio of observed YLDs to predicted YLDs on the basis of Socio-Demographic Index (SDI), rounded to two (2) digits. Color ranges (shown below) were calculated to place a roughly equal number of cells into each bin.

| COLOR KEY:        |                 | [0.0-0.8]       | (0.8-0.89]         | (0.89-0.97]          | (0.97-1.02]          | (1.02-1.1]         | (1.1-1.24]           | (1.24-1.42]          | (1.42-1.91]         | 1.91+                |
|-------------------|-----------------|-----------------|--------------------|----------------------|----------------------|--------------------|----------------------|----------------------|---------------------|----------------------|
|                   | 1               | 2               | 3                  | 4                    | 5                    | 6                  | 7                    | 8                    | 9                   | 10                   |
| Liberia           | Iron<br>[1.47]  | Vit A<br>[0.84] | Oncho<br>[211.61]  | Dermatitis<br>[0.95] | Neonatal<br>[1.22]   | Hemog<br>[2.19]    | Diarrhea<br>[1.4]    | Epilepsy<br>[1.4]    | Malaria<br>[1.77]   | Asthma<br>[0.78]     |
| Mali              | Iron<br>[1.82]  | Vit A<br>[1.11] | Malaria<br>[1.3]   | Dermatitis<br>[0.79] | Oth NTD<br>[0.76]    | Neonatal<br>[0.93] | Diarrhea<br>[0.91]   | Congenital<br>[0.94] | Skin Fung<br>[1.44] | Hemog<br>[1.19]      |
| Mauritania        | Iron<br>[1.41]  | Vit A<br>[1.25] | Neonatal<br>[1.24] | Dermatitis<br>[0.95] | Asthma<br>[0.97]     | Diarrhea<br>[1.28] | Epilepsy<br>[1.29]   | Congenital<br>[0.97] | Conduct<br>[0.94]   | Skin Viral<br>[0.9]  |
| Niger             | Iron<br>[1.3]   | Vit A<br>[0.7]  | Malaria<br>[1.04]  | Dermatitis<br>[0.94] | Asthma<br>[0.82]     | Hemog<br>[1.13]    | Congenital<br>[0.9]  | Diarrhea<br>[0.81]   | Neonatal<br>[0.98]  | Epilepsy<br>[0.83]   |
| Nigeria           | Iron<br>[2.58]  | Vit A<br>[1.56] | Hemog<br>[3.49]    | Dermatitis<br>[0.83] | Congenital<br>[1.41] | Malaria<br>[34.81] | Asthma<br>[0.62]     | Epilepsy<br>[1.14]   | Neonatal<br>[0.49]  | Oth NTD<br>[1.71]    |
| Sao Tome Principe | Vit A<br>[1.53] | Iron<br>[1.23]  | Neonatal<br>[1.24] | Dermatitis<br>[0.95] | Diarrhea<br>[1.31]   | Asthma<br>[0.7]    | Epilepsy<br>[1.3]    | Congenital<br>[0.99] | Conduct<br>[0.93]   | Skin Viral<br>[0.9]  |
| Senegal           | Iron<br>[1.45]  | Vit A<br>[0.99] | Neonatal<br>[1.54] | Dermatitis<br>[0.95] | Diarrhea<br>[1.26]   | Epilepsy<br>[1.15] | Congenital<br>[0.98] | Asthma<br>[0.63]     | Conduct<br>[0.96]   | Skin Viral<br>[0.92] |
| Sierra Leone      | Iron<br>[1.68]  | Vit A<br>[1.09] | Malaria<br>[5.31]  | Hemog<br>[2.75]      | Dermatitis<br>[0.95] | Epilepsy<br>[1.21] | Asthma<br>[0.76]     | Diarrhea<br>[1.06]   | Neonatal<br>[0.76]  | Oncho<br>[60.2]      |
| Togo              | Vit A<br>[1.15] | Iron<br>[1.02]  | Malaria<br>[15.05] | Neonatal<br>[1.12]   | Dermatitis<br>[0.95] | Asthma<br>[0.84]   | Epilepsy<br>[1.27]   | Diarrhea<br>[1.17]   | Hemog<br>[1.93]     | Congenital<br>[0.99] |

**eFigure 9e. Leading ten causes of YLDs with the ratio of observed YLDs to YLDs expected on the basis of Socio-Demographic Index alone in 2017, 10-19 years, both sexes combined.** The top ten causes contributing to YLDs are listed globally, by socio-demographic quintile, and then by GBD superregion, region, country, and subnationally where modeled. For each cell, the ratio of observed YLDs to YLDs expected on the basis of socio-demographic index (SDI) alone are listed. Abbreviations: YLD=year of life lived with disability, GBD=Global Burden of Disease.

Values shown in brackets represent the ratio of observed YLDs to predicted YLDs on the basis of Socio-Demographic Index (SDI), rounded to two (2) digits. Color ranges (shown below) were calculated to place a roughly equal number of cells into each bin.

| COLOR KEY:                                       |                     | [0.0-0.77]          | [0.77-0.91]          | [0.91-0.97]          | [0.97-1.02]          | [1.02-1.1]           | [1.1-1.25]           | [1.25-1.48]            | [1.48-1.87]            | 1.87+                  |
|--------------------------------------------------|---------------------|---------------------|----------------------|----------------------|----------------------|----------------------|----------------------|------------------------|------------------------|------------------------|
|                                                  | 1                   | 2                   | 3                    | 4                    | 5                    | 6                    | 7                    | 8                      | 9                      | 10                     |
| Global                                           | Headaches<br>[0.85] | Iron<br>[1.82]      | Neonatal<br>[1.09]   | Conduct<br>[0.9]     | Anxiety<br>[0.88]    | Depression<br>[0.9]  | Back Pain<br>[0.82]  | Dermatitis<br>[0.82]   | Congenital<br>[0.99]   | Vit A<br>[2.88]        |
| Low SDI                                          | Iron<br>[1.17]      | Headaches<br>[0.92] | Conduct<br>[0.9]     | Neonatal<br>[1.43]   | Anxiety<br>[0.94]    | Depression<br>[0.92] | Back Pain<br>[0.77]  | Vit A<br>[1.33]        | Dermatitis<br>[0.9]    | Congenital<br>[1.04]   |
| Low-middle SDI                                   | Iron<br>[1.53]      | Headaches<br>[0.95] | Neonatal<br>[1.15]   | Conduct<br>[0.89]    | Anxiety<br>[0.92]    | Back Pain<br>[0.91]  | Depression<br>[0.9]  | Dermatitis<br>[0.85]   | Congenital<br>[1.05]   | Vit A<br>[1.92]        |
| Middle SDI                                       | Headaches<br>[0.81] | Neonatal<br>[1.21]  | Conduct<br>[0.88]    | Anxiety<br>[0.78]    | Back Pain<br>[0.75]  | Iron<br>[1.1]        | Depression<br>[0.73] | Congenital<br>[0.93]   | Dermatitis<br>[0.7]    | Asthma<br>[0.71]       |
| High-middle SDI                                  | Headaches<br>[0.79] | Neonatal<br>[1.25]  | Back Pain<br>[0.82]  | Anxiety<br>[0.76]    | Conduct<br>[0.95]    | Depression<br>[0.87] | Iron<br>[2.32]       | Dermatitis<br>[0.63]   | Congenital<br>[0.91]   | Asthma<br>[0.65]       |
| High SDI                                         | Headaches<br>[0.93] | Anxiety<br>[1.16]   | Depression<br>[1.33] | Back Pain<br>[1.05]  | Conduct<br>[0.98]    | Drugs<br>[3.14]      | Neonatal<br>[0.89]   | Acne<br>[1.63]         | Dermatitis<br>[1.12]   | Asthma<br>[0.97]       |
| Central Europe, Eastern Europe, and Central Asia | Headaches<br>[0.9]  | Neonatal<br>[1.38]  | Conduct<br>[1.03]    | Back Pain<br>[0.8]   | Falls<br>[1.9]       | Anxiety<br>[0.62]    | Depression<br>[0.71] | Iron<br>[2.19]         | Upper Digest<br>[3.35] | Congenital<br>[1.11]   |
| Central Asia                                     | Headaches<br>[0.88] | Iron<br>[2.39]      | Conduct<br>[0.98]    | Neonatal<br>[0.93]   | Back Pain<br>[0.74]  | Depression<br>[0.79] | Anxiety<br>[0.59]    | Falls<br>[1.64]        | Epilepsy<br>[1.45]     | Congenital<br>[1.1]    |
| Armenia                                          | Headaches<br>[0.86] | Conduct<br>[1.0]    | Neonatal<br>[0.98]   | Iron<br>[1.82]       | Back Pain<br>[0.74]  | Depression<br>[0.71] | Anxiety<br>[0.57]    | Falls<br>[1.47]        | Congenital<br>[1.11]   | Epilepsy<br>[1.32]     |
| Azerbaijan                                       | Headaches<br>[0.87] | Conduct<br>[1.0]    | Neonatal<br>[0.89]   | Iron<br>[1.74]       | Back Pain<br>[0.72]  | Depression<br>[0.66] | Anxiety<br>[0.57]    | Falls<br>[1.48]        | Congenital<br>[1.07]   | Epilepsy<br>[1.43]     |
| Georgia                                          | Headaches<br>[0.87] | Conduct<br>[1.0]    | Neonatal<br>[0.97]   | Depression<br>[0.72] | Back Pain<br>[0.64]  | Anxiety<br>[0.58]    | Iron<br>[1.27]       | Congenital<br>[1.13]   | Epilepsy<br>[1.36]     | Falls<br>[1.23]        |
| Kazakhstan                                       | Headaches<br>[0.86] | Conduct<br>[1.01]   | Neonatal<br>[1.01]   | Depression<br>[0.91] | Back Pain<br>[0.75]  | Iron<br>[2.14]       | Anxiety<br>[0.56]    | Falls<br>[1.3]         | Congenital<br>[1.12]   | Epilepsy<br>[1.54]     |
| Kyrgyzstan                                       | Headaches<br>[0.9]  | Iron<br>[1.86]      | Conduct<br>[0.97]    | Neonatal<br>[1.03]   | Depression<br>[0.84] | Back Pain<br>[0.78]  | Anxiety<br>[0.64]    | Falls<br>[2.16]        | Congenital<br>[1.12]   | Epilepsy<br>[1.15]     |
| Mongolia                                         | Headaches<br>[0.88] | Conduct<br>[0.98]   | Neonatal<br>[0.98]   | Depression<br>[0.96] | Iron<br>[1.27]       | Back Pain<br>[0.74]  | Anxiety<br>[0.61]    | Falls<br>[2.08]        | Vit A<br>[4.49]        | Congenital<br>[1.12]   |
| Tajikistan                                       | Headaches<br>[0.93] | Conduct<br>[0.97]   | Iron<br>[0.94]       | Neonatal<br>[1.04]   | Back Pain<br>[0.8]   | Depression<br>[0.71] | Anxiety<br>[0.67]    | Falls<br>[2.82]        | Epilepsy<br>[1.26]     | Congenital<br>[1.12]   |
| Turkmenistan                                     | Headaches<br>[0.87] | Conduct<br>[0.99]   | Iron<br>[1.83]       | Neonatal<br>[0.83]   | Back Pain<br>[0.71]  | Depression<br>[0.76] | Anxiety<br>[0.58]    | Falls<br>[1.56]        | Congenital<br>[1.1]    | Epilepsy<br>[1.45]     |
| Uzbekistan                                       | Iron<br>[2.73]      | Headaches<br>[0.89] | Conduct<br>[0.97]    | Neonatal<br>[0.91]   | Back Pain<br>[0.76]  | Depression<br>[0.81] | Anxiety<br>[0.63]    | Falls<br>[1.92]        | Epilepsy<br>[1.41]     | Congenital<br>[1.08]   |
| Central Europe                                   | Headaches<br>[0.87] | Neonatal<br>[1.43]  | Falls<br>[2.28]      | Back Pain<br>[0.91]  | Conduct<br>[1.03]    | Anxiety<br>[0.69]    | Depression<br>[0.59] | Congenital<br>[1.28]   | Upper Digest<br>[3.4]  | Dermatitis<br>[0.7]    |
| Albania                                          | Headaches<br>[0.9]  | Back Pain<br>[1.13] | Neonatal<br>[1.19]   | Falls<br>[3.35]      | Conduct<br>[0.97]    | Anxiety<br>[0.79]    | Depression<br>[0.65] | Congenital<br>[1.23]   | Iron<br>[0.8]          | Upper Digest<br>[2.93] |
| Bosnia                                           | Headaches<br>[0.89] | Neonatal<br>[1.42]  | Falls<br>[3.19]      | Conduct<br>[0.98]    | Back Pain<br>[0.92]  | Anxiety<br>[0.77]    | Depression<br>[0.66] | Congenital<br>[1.24]   | Upper Digest<br>[2.57] | Iron<br>[0.84]         |
| Bulgaria                                         | Headaches<br>[0.87] | Neonatal<br>[1.26]  | Conduct<br>[1.02]    | Falls<br>[2.35]      | Back Pain<br>[0.86]  | Anxiety<br>[0.74]    | Depression<br>[0.61] | Congenital<br>[1.33]   | Upper Digest<br>[2.65] | Dermatitis<br>[0.56]   |
| Croatia                                          | Headaches<br>[0.88] | Neonatal<br>[1.55]  | Conduct<br>[1.03]    | Back Pain<br>[0.89]  | Anxiety<br>[0.69]    | Depression<br>[0.71] | Falls<br>[1.39]      | Congenital<br>[1.27]   | Acne<br>[0.69]         | Dermatitis<br>[0.6]    |
| Czech                                            | Headaches<br>[0.87] | Falls<br>[2.55]     | Back Pain<br>[1.01]  | Conduct<br>[1.06]    | Neonatal<br>[0.93]   | Anxiety<br>[0.67]    | Depression<br>[0.65] | Congenital<br>[1.16]   | Dermatitis<br>[0.71]   | Drugs<br>[1.21]        |
| Hungary                                          | Headaches<br>[0.88] | Neonatal<br>[1.37]  | Back Pain<br>[1.01]  | Falls<br>[2.33]      | Conduct<br>[1.03]    | Anxiety<br>[0.69]    | Depression<br>[0.62] | Congenital<br>[1.28]   | Dermatitis<br>[0.83]   | Diarrhea<br>[3.64]     |
| Macedonia                                        | Headaches<br>[0.88] | Neonatal<br>[1.38]  | Falls<br>[2.66]      | Conduct<br>[1.0]     | Anxiety<br>[0.73]    | Back Pain<br>[0.69]  | Depression<br>[0.61] | Iron<br>[1.74]         | Congenital<br>[1.22]   | Upper Digest<br>[2.57] |
| Montenegro                                       | Headaches<br>[0.88] | Neonatal<br>[1.35]  | Back Pain<br>[0.96]  | Falls<br>[2.44]      | Conduct<br>[1.02]    | Anxiety<br>[0.71]    | Depression<br>[0.64] | Congenital<br>[1.24]   | Upper Digest<br>[2.71] | Dermatitis<br>[0.61]   |
| Poland                                           | Headaches<br>[0.88] | Neonatal<br>[1.59]  | Falls<br>[2.11]      | Conduct<br>[1.04]    | Back Pain<br>[0.74]  | Anxiety<br>[0.68]    | Depression<br>[0.52] | Upper Digest<br>[3.99] | Congenital<br>[1.28]   | Dermatitis<br>[0.8]    |
| Romania                                          | Headaches<br>[0.87] | Neonatal<br>[1.47]  | Back Pain<br>[1.06]  | Conduct<br>[1.01]    | Falls<br>[2.37]      | Iron<br>[3.64]       | Anxiety<br>[0.67]    | Upper Digest<br>[4.92] | Depression<br>[0.61]   | Congenital<br>[1.26]   |
| Serbia                                           | Neonatal<br>[1.82]  | Headaches<br>[0.87] | Back Pain<br>[1.0]   | Falls<br>[2.76]      | Conduct<br>[1.01]    | Anxiety<br>[0.73]    | Depression<br>[0.6]  | Congenital<br>[1.34]   | Dermatitis<br>[0.61]   | Bipolar<br>[0.78]      |
| Slovakia                                         | Headaches<br>[0.88] | Back Pain<br>[1.01] | Falls<br>[2.13]      | Conduct<br>[1.04]    | Neonatal<br>[1.03]   | Anxiety<br>[0.68]    | Depression<br>[0.58] | Congenital<br>[1.35]   | Upper Digest<br>[3.42] | Dermatitis<br>[0.7]    |
| Slovenia                                         | Headaches<br>[0.88] | Falls<br>[2.44]     | Back Pain<br>[1.08]  | Conduct<br>[1.06]    | Neonatal<br>[1.09]   | Anxiety<br>[0.67]    | Depression<br>[0.68] | Congenital<br>[1.32]   | Upper Digest<br>[3.41] | Acne<br>[0.65]         |

**eFigure 9e. Leading ten causes of YLDs with the ratio of observed YLDs to YLDs expected on the basis of Socio-Demographic Index alone in 2017, 10-19 years, both sexes combined.** The top ten causes contributing to YLDs are listed globally, by socio-demographic quintile, and then by GBD superregion, region, country, and subnationally where modeled. For each cell, the ratio of observed YLDs to YLDs expected on the basis of socio-demographic index (SDI) alone are listed. Abbreviations: YLD=year of life lived with disability, GBD=Global Burden of Disease.

Values shown in brackets represent the ratio of observed YLDs to predicted YLDs on the basis of Socio-Demographic Index (SDI), rounded to two (2) digits. Color ranges (shown below) were calculated to place a roughly equal number of cells into each bin.

| COLOR KEY:                      |                      | [0.0-0.77]          | [0.77-0.91]          | [0.91-0.97]           | [0.97-1.02]            | [1.02-1.1]           | [1.1-1.25]             | [1.25-1.48]            | [1.48-1.87]          | 1.87+                |
|---------------------------------|----------------------|---------------------|----------------------|-----------------------|------------------------|----------------------|------------------------|------------------------|----------------------|----------------------|
|                                 | 1                    | 2                   | 3                    | 4                     | 5                      | 6                    | 7                      | 8                      | 9                    | 10                   |
| <b>Eastern Europe</b>           | Headaches<br>[0.95]  | Neonatal<br>[1.65]  | Conduct<br>[1.08]    | Back Pain<br>[0.79]   | Falls<br>[1.82]        | Depression<br>[0.74] | Anxiety<br>[0.6]       | Upper Digest<br>[5.16] | Congenital<br>[1.04] | Dermatitis<br>[0.68] |
| Belarus                         | Headaches<br>[0.96]  | Neonatal<br>[1.66]  | Conduct<br>[1.01]    | Back Pain<br>[0.82]   | Depression<br>[0.82]   | Falls<br>[1.85]      | Anxiety<br>[0.62]      | Upper Digest<br>[4.97] | Dermatitis<br>[0.77] | Congenital<br>[1.03] |
| Estonia                         | Headaches<br>[0.97]  | Neonatal<br>[1.72]  | Conduct<br>[1.07]    | Back Pain<br>[0.73]   | Depression<br>[0.83]   | Falls<br>[1.47]      | Anxiety<br>[0.57]      | Upper Digest<br>[5.65] | Dermatitis<br>[1.03] | Congenital<br>[1.06] |
| Latvia                          | Headaches<br>[0.96]  | Neonatal<br>[1.57]  | Conduct<br>[1.04]    | Back Pain<br>[0.81]   | Upper Digest<br>[6.95] | Falls<br>[1.6]       | Anxiety<br>[0.59]      | Depression<br>[0.68]   | Dermatitis<br>[0.72] | Congenital<br>[0.98] |
| Lithuania                       | Headaches<br>[1.05]  | Neonatal<br>[1.79]  | Conduct<br>[1.03]    | Back Pain<br>[0.78]   | Depression<br>[0.88]   | Falls<br>[1.57]      | Anxiety<br>[0.59]      | Upper Digest<br>[5.59] | Congenital<br>[1.17] | Acne<br>[0.65]       |
| Moldova                         | Headaches<br>[0.98]  | Neonatal<br>[1.79]  | Conduct<br>[0.98]    | Upper Digest<br>[6.7] | Back Pain<br>[0.89]    | Falls<br>[2.65]      | Depression<br>[0.76]   | Anxiety<br>[0.69]      | Iron<br>[1.21]       | Dermatitis<br>[0.81] |
| Russian Federation              | Headaches<br>[0.94]  | Neonatal<br>[1.65]  | Conduct<br>[1.09]    | Back Pain<br>[0.73]   | Falls<br>[1.81]        | Anxiety<br>[0.6]     | Depression<br>[0.7]    | Upper Digest<br>[5.06] | Congenital<br>[1.03] | Iron<br>[1.7]        |
| Ukraine                         | Headaches<br>[0.97]  | Neonatal<br>[1.65]  | Conduct<br>[1.06]    | Back Pain<br>[0.98]   | Depression<br>[0.85]   | Falls<br>[2.06]      | Upper Digest<br>[5.21] | Anxiety<br>[0.63]      | Congenital<br>[1.09] | Dermatitis<br>[0.69] |
| <b>High-income</b>              | Headaches<br>[0.94]  | Anxiety<br>[1.1]    | Depression<br>[1.38] | Back Pain<br>[1.03]   | Conduct<br>[1.03]      | Drugs<br>[2.89]      | Neonatal<br>[0.89]     | Acne<br>[1.26]         | Dermatitis<br>[1.14] | Asthma<br>[0.98]     |
| <b>Australasia</b>              | Depression<br>[1.62] | Anxiety<br>[1.26]   | Headaches<br>[0.88]  | Back Pain<br>[1.22]   | Falls<br>[1.94]        | Conduct<br>[1.02]    | Asthma<br>[1.87]       | Neonatal<br>[0.89]     | Acne<br>[1.09]       | Bipolar<br>[1.48]    |
| Australia                       | Depression<br>[1.65] | Anxiety<br>[1.21]   | Headaches<br>[0.88]  | Back Pain<br>[1.17]   | Falls<br>[1.87]        | Asthma<br>[1.95]     | Conduct<br>[1.0]       | Neonatal<br>[0.87]     | Drugs<br>[2.07]      | Acne<br>[1.08]       |
| New Zealand                     | Anxiety<br>[1.55]    | Back Pain<br>[1.51] | Headaches<br>[0.89]  | Depression<br>[1.49]  | Falls<br>[2.34]        | Conduct<br>[1.09]    | Neonatal<br>[1.02]     | Asthma<br>[1.5]        | Dermatitis<br>[1.25] | Bipolar<br>[1.48]    |
| <b>High-income Asia Pacific</b> | Back Pain<br>[1.19]  | Headaches<br>[0.75] | Neonatal<br>[1.12]   | Anxiety<br>[0.78]     | Conduct<br>[0.99]      | Depression<br>[0.94] | Acne<br>[1.26]         | Falls<br>[1.18]        | Dermatitis<br>[1.15] | Iron<br>[2.79]       |
| Brunei                          | Headaches<br>[0.74]  | Back Pain<br>[0.96] | Neonatal<br>[1.13]   | Anxiety<br>[0.8]      | Conduct<br>[0.93]      | Depression<br>[0.86] | Dermatitis<br>[1.07]   | Acne<br>[1.08]         | Falls<br>[1.07]      | Iron<br>[2.8]        |
| Japan                           | Back Pain<br>[1.27]  | Headaches<br>[0.7]  | Neonatal<br>[1.11]   | Conduct<br>[1.03]     | Anxiety<br>[0.77]      | Depression<br>[0.92] | Falls<br>[1.31]        | Acne<br>[1.27]         | Dermatitis<br>[1.21] | Iron<br>[3.33]       |
| Aichi                           | Back Pain<br>[1.26]  | Neonatal<br>[1.13]  | Conduct<br>[1.04]    | Anxiety<br>[0.76]     | Headaches<br>[0.56]    | Depression<br>[0.92] | Falls<br>[1.27]        | Acne<br>[1.24]         | Dermatitis<br>[1.22] | Iron<br>[3.11]       |
| Akita                           | Back Pain<br>[1.29]  | Headaches<br>[0.71] | Neonatal<br>[1.22]   | Conduct<br>[1.01]     | Depression<br>[0.98]   | Anxiety<br>[0.79]    | Falls<br>[1.42]        | Dermatitis<br>[1.22]   | Acne<br>[1.36]       | Iron<br>[2.56]       |
| Aomori                          | Back Pain<br>[1.29]  | Headaches<br>[0.71] | Neonatal<br>[1.14]   | Conduct<br>[1.0]      | Anxiety<br>[0.79]      | Depression<br>[0.95] | Falls<br>[1.44]        | Dermatitis<br>[1.22]   | Acne<br>[1.35]       | Iron<br>[3.03]       |
| Chiba                           | Back Pain<br>[1.26]  | Headaches<br>[0.71] | Conduct<br>[1.03]    | Neonatal<br>[1.1]     | Anxiety<br>[0.77]      | Depression<br>[0.92] | Falls<br>[1.32]        | Acne<br>[1.28]         | Dermatitis<br>[1.22] | Iron<br>[3.33]       |
| Ehime                           | Back Pain<br>[1.25]  | Headaches<br>[0.71] | Conduct<br>[1.02]    | Anxiety<br>[0.78]     | Depression<br>[0.91]   | Neonatal<br>[0.93]   | Falls<br>[1.37]        | Dermatitis<br>[1.22]   | Acne<br>[1.31]       | Iron<br>[3.01]       |
| Fukui                           | Back Pain<br>[1.26]  | Headaches<br>[0.71] | Conduct<br>[1.02]    | Neonatal<br>[1.1]     | Anxiety<br>[0.77]      | Depression<br>[0.89] | Falls<br>[1.34]        | Acne<br>[1.31]         | Dermatitis<br>[1.22] | Iron<br>[3.31]       |
| Fukuoka                         | Back Pain<br>[1.26]  | Headaches<br>[0.71] | Conduct<br>[1.03]    | Neonatal<br>[1.09]    | Anxiety<br>[0.77]      | Depression<br>[0.91] | Falls<br>[1.34]        | Acne<br>[1.3]          | Dermatitis<br>[1.21] | Iron<br>[3.75]       |
| Fukushima                       | Back Pain<br>[1.28]  | Headaches<br>[0.7]  | Conduct<br>[1.01]    | Neonatal<br>[1.05]    | Anxiety<br>[0.79]      | Depression<br>[0.92] | Falls<br>[1.42]        | Dermatitis<br>[1.22]   | Acne<br>[1.34]       | Iron<br>[2.82]       |
| Gifu                            | Back Pain<br>[1.29]  | Headaches<br>[0.71] | Neonatal<br>[1.14]   | Conduct<br>[1.02]     | Anxiety<br>[0.78]      | Depression<br>[0.78] | Falls<br>[1.35]        | Dermatitis<br>[1.22]   | Acne<br>[1.3]        | Iron<br>[3.48]       |
| Gunma                           | Back Pain<br>[1.28]  | Headaches<br>[0.71] | Conduct<br>[1.02]    | Neonatal<br>[1.08]    | Anxiety<br>[0.78]      | Depression<br>[0.95] | Falls<br>[1.36]        | Acne<br>[1.3]          | Dermatitis<br>[1.21] | Iron<br>[3.95]       |
| Hiroshima                       | Back Pain<br>[1.24]  | Headaches<br>[0.71] | Neonatal<br>[1.15]   | Conduct<br>[1.04]     | Anxiety<br>[0.76]      | Depression<br>[0.88] | Falls<br>[1.29]        | Acne<br>[1.26]         | Dermatitis<br>[1.22] | Iron<br>[3.68]       |
| Hokkaido                        | Back Pain<br>[1.28]  | Headaches<br>[0.71] | Conduct<br>[1.01]    | Neonatal<br>[1.08]    | Anxiety<br>[0.78]      | Depression<br>[0.93] | Falls<br>[1.39]        | Dermatitis<br>[1.21]   | Acne<br>[1.33]       | Iron<br>[3.66]       |
| Hyogo                           | Back Pain<br>[1.26]  | Headaches<br>[0.72] | Neonatal<br>[1.12]   | Conduct<br>[1.03]     | Anxiety<br>[0.77]      | Depression<br>[0.94] | Falls<br>[1.31]        | Acne<br>[1.29]         | Dermatitis<br>[1.22] | Iron<br>[3.08]       |
| Ibaraki                         | Back Pain<br>[1.27]  | Headaches<br>[0.62] | Neonatal<br>[1.16]   | Conduct<br>[1.03]     | Anxiety<br>[0.77]      | Depression<br>[0.93] | Falls<br>[1.34]        | Acne<br>[1.31]         | Dermatitis<br>[1.21] | Iron<br>[2.52]       |
| Ishikawa                        | Back Pain<br>[1.26]  | Headaches<br>[0.72] | Conduct<br>[1.02]    | Neonatal<br>[1.08]    | Anxiety<br>[0.77]      | Depression<br>[0.9]  | Falls<br>[1.34]        | Acne<br>[1.31]         | Dermatitis<br>[1.21] | Iron<br>[3.22]       |
| Iwate                           | Back Pain<br>[1.29]  | Headaches<br>[0.71] | Neonatal<br>[1.17]   | Conduct<br>[1.01]     | Anxiety<br>[0.79]      | Depression<br>[0.96] | Falls<br>[1.43]        | Dermatitis<br>[1.22]   | Acne<br>[1.35]       | Iron<br>[2.93]       |

**eFigure 9e. Leading ten causes of YLDs with the ratio of observed YLDs to YLDs expected on the basis of Socio-Demographic Index alone in 2017, 10-19 years, both sexes combined.** The top ten causes contributing to YLDs are listed globally, by socio-demographic quintile, and then by GBD superregion, region, country, and subnationally where modeled. For each cell, the ratio of observed YLDs to YLDs expected on the basis of socio-demographic index (SDI) alone are listed. Abbreviations: YLD=year of life lived with disability, GBD=Global Burden of Disease.

Values shown in brackets represent the ratio of observed YLDs to predicted YLDs on the basis of Socio-Demographic Index (SDI), rounded to two (2) digits. Color ranges (shown below) were calculated to place a roughly equal number of cells into each bin.

| COLOR KEY: |                     | [0.0-0.77]          | [0.77-0.91]        | [0.91-0.97]        | [0.97-1.02]        | [1.02-1.1]           | [1.1-1.25]          | [1.25-1.48]          | [1.48-1.87]          | 1.87+                |
|------------|---------------------|---------------------|--------------------|--------------------|--------------------|----------------------|---------------------|----------------------|----------------------|----------------------|
|            | 1                   | 2                   | 3                  | 4                  | 5                  | 6                    | 7                   | 8                    | 9                    | 10                   |
| Kagawa     | Back Pain<br>[1.24] | Headaches<br>[0.71] | Conduct<br>[1.02]  | Neonatal<br>[1.06] | Anxiety<br>[0.78]  | Depression<br>[0.88] | Falls<br>[1.33]     | Dermatitis<br>[1.22] | Acne<br>[1.3]        | Iron<br>[3.37]       |
| Kagoshima  | Back Pain<br>[1.25] | Headaches<br>[0.7]  | Conduct<br>[1.02]  | Anxiety<br>[0.79]  | Neonatal<br>[0.97] | Depression<br>[0.78] | Falls<br>[1.41]     | Dermatitis<br>[1.23] | Acne<br>[1.31]       | Iron<br>[2.56]       |
| Kanagawa   | Back Pain<br>[1.26] | Headaches<br>[0.72] | Neonatal<br>[1.15] | Conduct<br>[1.04]  | Anxiety<br>[0.76]  | Depression<br>[0.95] | Falls<br>[1.3]      | Acne<br>[1.26]       | Dermatitis<br>[1.21] | Iron<br>[3.01]       |
| Kochi      | Back Pain<br>[1.27] | Headaches<br>[0.71] | Conduct<br>[1.01]  | Neonatal<br>[1.04] | Anxiety<br>[0.79]  | Depression<br>[0.9]  | Iron<br>[3.9]       | Dermatitis<br>[1.22] | Falls<br>[1.41]      | Acne<br>[1.35]       |
| Kumamoto   | Back Pain<br>[1.25] | Headaches<br>[0.7]  | Conduct<br>[1.02]  | Anxiety<br>[0.79]  | Neonatal<br>[1.02] | Depression<br>[0.89] | Falls<br>[1.42]     | Dermatitis<br>[1.22] | Acne<br>[1.34]       | Iron<br>[3.14]       |
| Kyoto      | Back Pain<br>[1.29] | Headaches<br>[0.73] | Neonatal<br>[1.15] | Conduct<br>[1.03]  | Anxiety<br>[0.76]  | Depression<br>[0.94] | Falls<br>[1.29]     | Acne<br>[1.27]       | Dermatitis<br>[0.91] | Iron<br>[3.35]       |
| Mie        | Back Pain<br>[1.25] | Headaches<br>[0.71] | Neonatal<br>[1.14] | Conduct<br>[1.03]  | Anxiety<br>[0.77]  | Depression<br>[0.89] | Falls<br>[1.32]     | Acne<br>[1.29]       | Dermatitis<br>[1.22] | Iron<br>[4.11]       |
| Miyagi     | Back Pain<br>[1.29] | Headaches<br>[0.72] | Conduct<br>[1.02]  | Neonatal<br>[1.06] | Anxiety<br>[0.78]  | Depression<br>[0.97] | Falls<br>[1.37]     | Acne<br>[1.34]       | Dermatitis<br>[1.21] | Iron<br>[3.2]        |
| Miyazaki   | Back Pain<br>[1.26] | Headaches<br>[0.7]  | Conduct<br>[1.01]  | Anxiety<br>[0.79]  | Neonatal<br>[1.02] | Depression<br>[0.91] | Iron<br>[4.08]      | Falls<br>[1.43]      | Dermatitis<br>[1.22] | Acne<br>[1.34]       |
| Nagano     | Back Pain<br>[1.26] | Headaches<br>[0.71] | Neonatal<br>[1.17] | Conduct<br>[1.03]  | Anxiety<br>[0.77]  | Depression<br>[0.9]  | Falls<br>[1.35]     | Acne<br>[1.31]       | Dermatitis<br>[1.22] | Iron<br>[3.8]        |
| Nagasaki   | Back Pain<br>[1.25] | Headaches<br>[0.71] | Conduct<br>[1.01]  | Anxiety<br>[0.79]  | Neonatal<br>[1.02] | Depression<br>[0.89] | Falls<br>[1.44]     | Dermatitis<br>[1.22] | Acne<br>[1.35]       | Iron<br>[3.42]       |
| Nara       | Back Pain<br>[1.31] | Headaches<br>[0.72] | Conduct<br>[1.02]  | Anxiety<br>[0.78]  | Neonatal<br>[1.0]  | Depression<br>[0.91] | Falls<br>[1.37]     | Acne<br>[1.31]       | Dermatitis<br>[1.21] | Iron<br>[3.1]        |
| Niigata    | Back Pain<br>[1.43] | Headaches<br>[0.71] | Neonatal<br>[1.13] | Conduct<br>[1.02]  | Anxiety<br>[0.78]  | Depression<br>[0.97] | Falls<br>[1.37]     | Acne<br>[1.33]       | Dermatitis<br>[1.22] | Iron<br>[2.89]       |
| Oita       | Back Pain<br>[1.25] | Headaches<br>[0.71] | Neonatal<br>[1.17] | Conduct<br>[1.02]  | Anxiety<br>[0.78]  | Depression<br>[0.91] | Falls<br>[1.36]     | Dermatitis<br>[1.22] | Acne<br>[1.32]       | Iron<br>[3.49]       |
| Okayama    | Back Pain<br>[1.27] | Headaches<br>[0.72] | Neonatal<br>[1.18] | Conduct<br>[1.03]  | Anxiety<br>[0.77]  | Depression<br>[0.9]  | Falls<br>[1.33]     | Acne<br>[1.3]        | Dermatitis<br>[1.21] | Asthma<br>[0.68]     |
| Okinawa    | Back Pain<br>[1.25] | Headaches<br>[0.7]  | Conduct<br>[1.01]  | Neonatal<br>[1.08] | Anxiety<br>[0.79]  | Depression<br>[0.88] | Falls<br>[1.47]     | Dermatitis<br>[1.22] | Acne<br>[1.34]       | Iron<br>[3.46]       |
| Osaka      | Back Pain<br>[1.28] | Headaches<br>[0.72] | Conduct<br>[1.03]  | Anxiety<br>[0.76]  | Neonatal<br>[1.05] | Depression<br>[0.96] | Falls<br>[1.31]     | Acne<br>[1.26]       | Dermatitis<br>[1.21] | Congenital<br>[1.07] |
| Saga       | Back Pain<br>[1.26] | Headaches<br>[0.71] | Conduct<br>[1.01]  | Neonatal<br>[1.06] | Anxiety<br>[0.79]  | Depression<br>[0.88] | Falls<br>[1.39]     | Dermatitis<br>[1.22] | Acne<br>[1.33]       | Iron<br>[3.3]        |
| Saitama    | Back Pain<br>[1.31] | Headaches<br>[0.71] | Conduct<br>[1.02]  | Neonatal<br>[1.09] | Anxiety<br>[0.78]  | Depression<br>[0.95] | Falls<br>[1.38]     | Acne<br>[1.31]       | Dermatitis<br>[1.21] | Iron<br>[3.41]       |
| Shiga      | Back Pain<br>[1.26] | Headaches<br>[0.71] | Conduct<br>[1.04]  | Anxiety<br>[0.76]  | Neonatal<br>[1.04] | Depression<br>[0.89] | Dermatitis<br>[1.5] | Falls<br>[1.29]      | Acne<br>[1.26]       | Iron<br>[3.47]       |
| Shimane    | Back Pain<br>[1.18] | Headaches<br>[0.7]  | Conduct<br>[1.02]  | Neonatal<br>[1.05] | Anxiety<br>[0.79]  | Depression<br>[0.92] | Falls<br>[1.41]     | Dermatitis<br>[1.21] | Acne<br>[1.33]       | Iron<br>[3.08]       |
| Shizuoka   | Back Pain<br>[1.24] | Headaches<br>[0.71] | Neonatal<br>[1.22] | Conduct<br>[1.04]  | Anxiety<br>[0.77]  | Depression<br>[0.9]  | Falls<br>[1.3]      | Acne<br>[1.28]       | Dermatitis<br>[1.22] | Iron<br>[3.65]       |
| Tochigi    | Back Pain<br>[1.27] | Headaches<br>[0.71] | Neonatal<br>[1.17] | Conduct<br>[1.03]  | Anxiety<br>[0.77]  | Depression<br>[0.9]  | Falls<br>[1.32]     | Dermatitis<br>[1.22] | Acne<br>[1.29]       | Congenital<br>[1.36] |
| Tokushima  | Back Pain<br>[1.26] | Headaches<br>[0.72] | Neonatal<br>[1.11] | Conduct<br>[1.01]  | Anxiety<br>[0.78]  | Depression<br>[0.91] | Falls<br>[1.35]     | Dermatitis<br>[1.22] | Acne<br>[1.3]        | Iron<br>[2.88]       |
| Tokyo      | Back Pain<br>[1.24] | Headaches<br>[0.73] | Neonatal<br>[1.15] | Conduct<br>[1.08]  | Anxiety<br>[0.73]  | Depression<br>[0.88] | Acne<br>[1.16]      | Falls<br>[1.15]      | Dermatitis<br>[1.23] | Congenital<br>[1.19] |
| Tottori    | Back Pain<br>[1.26] | Headaches<br>[0.66] | Neonatal<br>[1.13] | Conduct<br>[1.01]  | Anxiety<br>[0.79]  | Depression<br>[0.91] | Falls<br>[1.39]     | Dermatitis<br>[1.22] | Acne<br>[1.33]       | Iron<br>[2.68]       |
| Toyama     | Back Pain<br>[1.25] | Headaches<br>[0.71] | Conduct<br>[1.04]  | Neonatal<br>[1.07] | Anxiety<br>[0.77]  | Depression<br>[0.91] | Falls<br>[1.3]      | Acne<br>[1.28]       | Dermatitis<br>[1.22] | Iron<br>[4.23]       |
| Wakayama   | Back Pain<br>[1.44] | Headaches<br>[0.71] | Neonatal<br>[1.17] | Conduct<br>[1.02]  | Anxiety<br>[0.78]  | Depression<br>[0.92] | Falls<br>[1.38]     | Dermatitis<br>[1.22] | Acne<br>[1.31]       | Iron<br>[3.13]       |
| Yamagata   | Back Pain<br>[1.28] | Headaches<br>[0.71] | Conduct<br>[1.01]  | Anxiety<br>[0.79]  | Neonatal<br>[0.96] | Depression<br>[0.88] | Falls<br>[1.44]     | Dermatitis<br>[1.22] | Acne<br>[1.35]       | Iron<br>[3.56]       |
| Yamaguchi  | Back Pain<br>[1.25] | Headaches<br>[0.71] | Conduct<br>[1.02]  | Anxiety<br>[0.78]  | Neonatal<br>[0.98] | Depression<br>[0.91] | Falls<br>[1.33]     | Acne<br>[1.31]       | Dermatitis<br>[1.22] | Iron<br>[3.22]       |
| Yamanashi  | Back Pain<br>[1.28] | Headaches<br>[0.71] | Neonatal<br>[1.23] | Conduct<br>[1.03]  | Anxiety<br>[0.77]  | Depression<br>[0.91] | Falls<br>[1.33]     | Acne<br>[1.29]       | Dermatitis<br>[1.2]  | Iron<br>[3.84]       |

**eFigure 9e. Leading ten causes of YLDs with the ratio of observed YLDs to YLDs expected on the basis of Socio-Demographic Index alone in 2017, 10-19 years, both sexes combined.** The top ten causes contributing to YLDs are listed globally, by socio-demographic quintile, and then by GBD superregion, region, country, and subnationally where modeled. For each cell, the ratio of observed YLDs to YLDs expected on the basis of socio-demographic index (SDI) alone are listed. Abbreviations: YLD=year of life lived with disability, GBD=Global Burden of Disease.

Values shown in brackets represent the ratio of observed YLDs to predicted YLDs on the basis of Socio-Demographic Index (SDI), rounded to two (2) digits. Color ranges (shown below) were calculated to place a roughly equal number of cells into each bin.

| COLOR KEY:                |                      | [0.0-0.77]           | [0.77-0.91]          | [0.91-0.97]         | [0.97-1.02]          | [1.02-1.1]           | [1.1-1.25]           | [1.25-1.48]          | [1.48-1.87]          | 1.87+                |
|---------------------------|----------------------|----------------------|----------------------|---------------------|----------------------|----------------------|----------------------|----------------------|----------------------|----------------------|
|                           | 1                    | 2                    | 3                    | 4                   | 5                    | 6                    | 7                    | 8                    | 9                    | 10                   |
| S Korea                   | Headaches<br>[0.86]  | Back Pain<br>[1.06]  | Neonatal<br>[1.14]   | Anxiety<br>[0.83]   | Depression<br>[0.97] | Conduct<br>[0.89]    | Acne<br>[1.29]       | Dermatitis<br>[1.03] | Falls<br>[0.97]      | Drugs<br>[1.22]      |
| Singapore                 | Headaches<br>[0.72]  | Depression<br>[1.24] | Back Pain<br>[0.91]  | Neonatal<br>[1.14]  | Anxiety<br>[0.82]    | Conduct<br>[0.89]    | Acne<br>[1.23]       | Falls<br>[1.03]      | Dermatitis<br>[0.95] | Drugs<br>[1.25]      |
| High-income North America | Depression<br>[1.83] | Headaches<br>[1.02]  | Drugs<br>[5.6]       | Anxiety<br>[1.02]   | Conduct<br>[1.2]     | Back Pain<br>[0.83]  | Neonatal<br>[0.86]   | Acne<br>[1.21]       | Dermatitis<br>[1.18] | Oth MSK<br>[5.79]    |
| Canada                    | Headaches<br>[1.04]  | Drugs<br>[5.09]      | Depression<br>[1.36] | Back Pain<br>[0.93] | Anxiety<br>[0.83]    | Conduct<br>[1.02]    | Acne<br>[1.25]       | Dermatitis<br>[1.22] | Neonatal<br>[0.6]    | Asthma<br>[0.99]     |
| Greenland                 | Depression<br>[2.51] | Headaches<br>[1.01]  | Drugs<br>[4.51]      | Anxiety<br>[1.04]   | Conduct<br>[0.98]    | Back Pain<br>[0.79]  | Dermatitis<br>[1.17] | Neonatal<br>[0.59]   | Asthma<br>[1.1]      | Acne<br>[1.28]       |
| USA                       | Depression<br>[1.87] | Drugs<br>[5.66]      | Headaches<br>[1.01]  | Anxiety<br>[1.05]   | Conduct<br>[1.21]    | Back Pain<br>[0.82]  | Neonatal<br>[0.88]   | Oth MSK<br>[5.98]    | Acne<br>[1.21]       | Dermatitis<br>[1.17] |
| Alabama                   | Drugs<br>[6.86]      | Depression<br>[1.84] | Headaches<br>[1.02]  | Anxiety<br>[1.08]   | Back Pain<br>[1.05]  | Conduct<br>[1.17]    | Neonatal<br>[0.87]   | Oth MSK<br>[6.4]     | Dermatitis<br>[1.02] | Acne<br>[1.08]       |
| Alaska                    | Depression<br>[1.87] | Drugs<br>[5.81]      | Headaches<br>[1.01]  | Anxiety<br>[1.05]   | Conduct<br>[1.21]    | Back Pain<br>[0.93]  | Neonatal<br>[0.84]   | Oth MSK<br>[6.43]    | Dermatitis<br>[1.0]  | Acne<br>[0.85]       |
| Arizona                   | Drugs<br>[7.34]      | Depression<br>[2.13] | Headaches<br>[1.01]  | Anxiety<br>[1.07]   | Conduct<br>[1.18]    | Back Pain<br>[0.9]   | Neonatal<br>[0.88]   | Dermatitis<br>[1.19] | Oth MSK<br>[6.22]    | Acne<br>[1.23]       |
| Arkansas                  | Depression<br>[2.15] | Drugs<br>[6.93]      | Headaches<br>[1.02]  | Anxiety<br>[1.09]   | Conduct<br>[1.17]    | Back Pain<br>[0.82]  | Neonatal<br>[0.77]   | Dermatitis<br>[0.94] | Oth MSK<br>[4.93]    | Acne<br>[0.98]       |
| California                | Depression<br>[1.83] | Headaches<br>[1.02]  | Drugs<br>[4.25]      | Anxiety<br>[1.02]   | Conduct<br>[1.21]    | Back Pain<br>[0.7]   | Dermatitis<br>[1.31] | Acne<br>[1.3]        | Neonatal<br>[0.73]   | Oth MSK<br>[5.39]    |
| Colorado                  | Depression<br>[2.07] | Headaches<br>[1.02]  | Drugs<br>[4.84]      | Anxiety<br>[1.04]   | Conduct<br>[1.22]    | Back Pain<br>[0.83]  | Neonatal<br>[0.89]   | Oth MSK<br>[6.29]    | Acne<br>[1.13]       | Dermatitis<br>[1.03] |
| Connecticut               | Drugs<br>[7.08]      | Headaches<br>[1.04]  | Depression<br>[1.67] | Anxiety<br>[1.02]   | Conduct<br>[1.23]    | Neonatal<br>[1.03]   | Back Pain<br>[0.7]   | Dermatitis<br>[1.37] | Acne<br>[1.27]       | Oth MSK<br>[6.07]    |
| Delaware                  | Drugs<br>[7.67]      | Depression<br>[1.97] | Headaches<br>[1.03]  | Anxiety<br>[1.05]   | Conduct<br>[1.2]     | Back Pain<br>[0.72]  | Neonatal<br>[0.85]   | Oth MSK<br>[5.99]    | Dermatitis<br>[1.06] | Acne<br>[1.04]       |
| DC                        | Drugs<br>[5.92]      | Headaches<br>[1.06]  | Depression<br>[1.63] | Anxiety<br>[1.06]   | Conduct<br>[1.2]     | Dermatitis<br>[1.53] | Acne<br>[1.45]       | Neonatal<br>[0.89]   | Back Pain<br>[0.52]  | Oth MSK<br>[4.76]    |
| Florida                   | Drugs<br>[5.83]      | Depression<br>[1.83] | Headaches<br>[1.03]  | Anxiety<br>[1.06]   | Conduct<br>[1.2]     | Neonatal<br>[0.98]   | Back Pain<br>[0.73]  | Acne<br>[1.24]       | Dermatitis<br>[1.14] | Oth MSK<br>[4.74]    |
| Georgia                   | Headaches<br>[1.02]  | Depression<br>[1.77] | Drugs<br>[5.37]      | Anxiety<br>[1.07]   | Conduct<br>[1.19]    | Back Pain<br>[0.8]   | Neonatal<br>[0.81]   | Dermatitis<br>[1.26] | Acne<br>[1.28]       | Oth MSK<br>[5.7]     |
| Hawaii                    | Depression<br>[1.85] | Headaches<br>[1.02]  | Anxiety<br>[1.04]    | Conduct<br>[1.21]   | Drugs<br>[2.92]      | Dermatitis<br>[1.41] | Neonatal<br>[0.81]   | Acne<br>[1.32]       | Back Pain<br>[0.58]  | Oth MSK<br>[4.42]    |
| Idaho                     | Depression<br>[2.07] | Headaches<br>[1.01]  | Drugs<br>[5.5]       | Anxiety<br>[1.07]   | Conduct<br>[1.19]    | Back Pain<br>[0.84]  | Oth MSK<br>[6.93]    | Neonatal<br>[0.73]   | Acne<br>[1.14]       | Dermatitis<br>[0.95] |
| Illinois                  | Headaches<br>[1.03]  | Depression<br>[1.7]  | Drugs<br>[4.84]      | Anxiety<br>[1.04]   | Conduct<br>[1.21]    | Back Pain<br>[0.9]   | Neonatal<br>[1.03]   | Oth MSK<br>[6.49]    | Acne<br>[1.2]        | Dermatitis<br>[1.03] |
| Indiana                   | Drugs<br>[6.67]      | Depression<br>[1.98] | Headaches<br>[1.02]  | Anxiety<br>[1.07]   | Conduct<br>[1.18]    | Back Pain<br>[0.96]  | Neonatal<br>[0.84]   | Oth MSK<br>[6.68]    | Dermatitis<br>[1.04] | Acne<br>[1.11]       |
| Iowa                      | Headaches<br>[1.02]  | Depression<br>[1.78] | Back Pain<br>[1.43]  | Anxiety<br>[1.05]   | Conduct<br>[1.2]     | Oth MSK<br>[7.81]    | Drugs<br>[2.84]      | Neonatal<br>[0.85]   | Acne<br>[1.09]       | Dermatitis<br>[0.95] |
| Kansas                    | Depression<br>[1.89] | Headaches<br>[1.02]  | Back Pain<br>[1.13]  | Anxiety<br>[1.05]   | Conduct<br>[1.2]     | Drugs<br>[3.56]      | Neonatal<br>[0.9]    | Oth MSK<br>[6.45]    | Acne<br>[1.06]       | Dermatitis<br>[0.99] |
| Kentucky                  | Drugs<br>[10.19]     | Depression<br>[1.99] | Headaches<br>[1.01]  | Anxiety<br>[1.08]   | Back Pain<br>[1.09]  | Conduct<br>[1.17]    | Neonatal<br>[0.86]   | Oth MSK<br>[7.19]    | Acne<br>[1.33]       | Dermatitis<br>[1.05] |
| Louisiana                 | Drugs<br>[7.58]      | Headaches<br>[1.02]  | Depression<br>[1.78] | Anxiety<br>[1.08]   | Conduct<br>[1.18]    | Back Pain<br>[0.87]  | Neonatal<br>[0.79]   | Acne<br>[1.39]       | Dermatitis<br>[1.11] | Oth MSK<br>[5.93]    |
| Maine                     | Drugs<br>[7.37]      | Depression<br>[1.95] | Headaches<br>[1.02]  | Anxiety<br>[1.05]   | Conduct<br>[1.2]     | Back Pain<br>[0.89]  | Oth MSK<br>[8.35]    | Neonatal<br>[0.88]   | Asthma<br>[1.03]     | Acne<br>[0.91]       |
| Maryland                  | Depression<br>[1.78] | Headaches<br>[1.03]  | Drugs<br>[4.57]      | Anxiety<br>[1.03]   | Conduct<br>[1.23]    | Neonatal<br>[1.02]   | Back Pain<br>[0.66]  | Dermatitis<br>[1.33] | Acne<br>[1.16]       | Oth MSK<br>[5.14]    |
| Massachusetts             | Drugs<br>[7.04]      | Depression<br>[1.81] | Headaches<br>[1.05]  | Anxiety<br>[1.02]   | Conduct<br>[1.24]    | Neonatal<br>[0.98]   | Back Pain<br>[0.68]  | Oth MSK<br>[5.94]    | Acne<br>[1.15]       | Dermatitis<br>[1.23] |
| Michigan                  | Drugs<br>[6.32]      | Depression<br>[1.93] | Headaches<br>[0.83]  | Anxiety<br>[1.05]   | Conduct<br>[1.2]     | Back Pain<br>[0.79]  | Neonatal<br>[0.87]   | Oth MSK<br>[6.61]    | Acne<br>[1.23]       | Dermatitis<br>[1.08] |
| Minnesota                 | Depression<br>[1.83] | Headaches<br>[1.03]  | Anxiety<br>[1.03]    | Conduct<br>[1.23]   | Drugs<br>[2.85]      | Back Pain<br>[0.72]  | Neonatal<br>[0.92]   | Oth MSK<br>[6.05]    | Acne<br>[1.07]       | Dermatitis<br>[0.92] |
| Mississippi               | Drugs<br>[6.4]       | Headaches<br>[1.02]  | Depression<br>[1.8]  | Anxiety<br>[1.1]    | Conduct<br>[1.17]    | Back Pain<br>[0.74]  | Neonatal<br>[0.84]   | Dermatitis<br>[0.93] | Oth MSK<br>[4.75]    | Acne<br>[0.93]       |

**eFigure 9e. Leading ten causes of YLDs with the ratio of observed YLDs to YLDs expected on the basis of Socio-Demographic Index alone in 2017, 10-19 years, both sexes combined.** The top ten causes contributing to YLDs are listed globally, by socio-demographic quintile, and then by GBD superregion, region, country, and subnationally where modeled. For each cell, the ratio of observed YLDs to YLDs expected on the basis of socio-demographic index (SDI) alone are listed. Abbreviations: YLD=year of life lived with disability, GBD=Global Burden of Disease.

Values shown in brackets represent the ratio of observed YLDs to predicted YLDs on the basis of Socio-Demographic Index (SDI), rounded to two (2) digits. Color ranges (shown below) were calculated to place a roughly equal number of cells into each bin.

| COLOR KEY:                    |                      | [0.0-0.77]           | [0.77-0.91]          | [0.91-0.97]          | [0.97-1.02]         | [1.02-1.1]          | [1.1-1.25]           | [1.25-1.48]          | [1.48-1.87]          | 1.87+                |
|-------------------------------|----------------------|----------------------|----------------------|----------------------|---------------------|---------------------|----------------------|----------------------|----------------------|----------------------|
|                               | 1                    | 2                    | 3                    | 4                    | 5                   | 6                   | 7                    | 8                    | 9                    | 10                   |
| Missouri                      | Depression<br>[2.01] | Drugs<br>[5.75]      | Headaches<br>[1.02]  | Anxiety<br>[1.06]    | Conduct<br>[1.19]   | Back Pain<br>[0.9]  | Neonatal<br>[0.9]    | Oth MSK<br>[6.69]    | Acne<br>[1.14]       | Dermatitis<br>[0.98] |
| Montana                       | Depression<br>[1.97] | Headaches<br>[1.01]  | Drugs<br>[5.31]      | Anxiety<br>[1.05]    | Conduct<br>[1.21]   | Back Pain<br>[0.94] | Oth MSK<br>[7.42]    | Neonatal<br>[0.85]   | Acne<br>[1.0]        | Dermatitis<br>[0.9]  |
| Nebraska                      | Headaches<br>[1.02]  | Depression<br>[1.76] | Back Pain<br>[1.22]  | Anxiety<br>[1.04]    | Conduct<br>[1.22]   | Drugs<br>[3.0]      | Neonatal<br>[0.85]   | Oth MSK<br>[6.02]    | Acne<br>[1.08]       | Dermatitis<br>[0.94] |
| Nevada                        | Drugs<br>[7.34]      | Depression<br>[1.96] | Headaches<br>[1.01]  | Anxiety<br>[1.07]    | Conduct<br>[1.19]   | Back Pain<br>[0.71] | Neonatal<br>[0.83]   | Dermatitis<br>[1.11] | Oth MSK<br>[5.5]     | Acne<br>[1.03]       |
| New Hampshire                 | Drugs<br>[7.97]      | Depression<br>[2.03] | Headaches<br>[1.04]  | Anxiety<br>[1.02]    | Conduct<br>[1.23]   | Back Pain<br>[0.83] | Oth MSK<br>[6.5]     | Neonatal<br>[0.83]   | Dermatitis<br>[0.97] | Acne<br>[0.91]       |
| New Jersey                    | Drugs<br>[5.52]      | Headaches<br>[1.03]  | Depression<br>[1.57] | Anxiety<br>[1.02]    | Conduct<br>[1.23]   | Back Pain<br>[0.77] | Neonatal<br>[0.93]   | Dermatitis<br>[1.43] | Acne<br>[1.3]        | Oth MSK<br>[5.66]    |
| New Mexico                    | Depression<br>[2.14] | Drugs<br>[6.46]      | Headaches<br>[1.01]  | Anxiety<br>[1.08]    | Conduct<br>[1.18]   | Back Pain<br>[0.96] | Neonatal<br>[0.93]   | Oth MSK<br>[6.61]    | Acne<br>[1.14]       | Dermatitis<br>[1.01] |
| New York                      | Depression<br>[1.94] | Headaches<br>[1.03]  | Drugs<br>[5.1]       | Anxiety<br>[1.03]    | Conduct<br>[1.22]   | Neonatal<br>[0.97]  | Acne<br>[1.48]       | Dermatitis<br>[1.5]  | Back Pain<br>[0.69]  | Oth MSK<br>[6.16]    |
| N Carolina                    | Depression<br>[1.83] | Headaches<br>[1.02]  | Drugs<br>[5.72]      | Anxiety<br>[1.0]     | Conduct<br>[1.11]   | Back Pain<br>[0.72] | Neonatal<br>[0.89]   | Acne<br>[1.22]       | Dermatitis<br>[1.09] | Oth MSK<br>[5.4]     |
| N Dakota                      | Headaches<br>[1.02]  | Depression<br>[1.7]  | Anxiety<br>[1.04]    | Back Pain<br>[1.02]  | Conduct<br>[1.22]   | Oth MSK<br>[9.65]   | Drugs<br>[2.79]      | Neonatal<br>[0.92]   | Acne<br>[1.01]       | Dermatitis<br>[0.86] |
| Ohio                          | Drugs<br>[8.17]      | Depression<br>[1.9]  | Headaches<br>[1.02]  | Anxiety<br>[1.06]    | Conduct<br>[1.19]   | Back Pain<br>[0.87] | Neonatal<br>[0.83]   | Oth MSK<br>[6.53]    | Dermatitis<br>[1.13] | Acne<br>[1.14]       |
| Oklahoma                      | Drugs<br>[7.79]      | Depression<br>[1.96] | Headaches<br>[1.01]  | Anxiety<br>[1.07]    | Conduct<br>[1.18]   | Back Pain<br>[0.98] | Oth MSK<br>[7.18]    | Neonatal<br>[0.79]   | Dermatitis<br>[1.17] | Acne<br>[1.09]       |
| Oregon                        | Drugs<br>[7.22]      | Depression<br>[2.05] | Headaches<br>[1.02]  | Anxiety<br>[0.97]    | Conduct<br>[1.1]    | Back Pain<br>[0.76] | Oth MSK<br>[6.67]    | Dermatitis<br>[1.22] | Neonatal<br>[0.76]   | Acne<br>[1.08]       |
| Pennsylvania                  | Drugs<br>[7.93]      | Depression<br>[1.84] | Headaches<br>[0.93]  | Anxiety<br>[1.04]    | Back Pain<br>[1.04] | Conduct<br>[1.21]   | Oth MSK<br>[7.09]    | Neonatal<br>[0.87]   | Acne<br>[1.2]        | Dermatitis<br>[1.19] |
| Rhode Island                  | Drugs<br>[8.95]      | Depression<br>[2.02] | Headaches<br>[1.04]  | Anxiety<br>[1.04]    | Conduct<br>[1.21]   | Back Pain<br>[0.68] | Neonatal<br>[0.84]   | Oth MSK<br>[5.74]    | Acne<br>[1.13]       | Dermatitis<br>[1.08] |
| S Carolina                    | Drugs<br>[6.93]      | Depression<br>[1.91] | Headaches<br>[1.02]  | Anxiety<br>[1.07]    | Conduct<br>[1.18]   | Back Pain<br>[0.86] | Neonatal<br>[0.83]   | Dermatitis<br>[1.26] | Oth MSK<br>[5.96]    | Acne<br>[1.21]       |
| S Dakota                      | Headaches<br>[1.01]  | Depression<br>[1.65] | Back Pain<br>[1.23]  | Anxiety<br>[1.05]    | Conduct<br>[1.21]   | Oth MSK<br>[8.25]   | Drugs<br>[2.82]      | Neonatal<br>[0.75]   | Acne<br>[1.12]       | Dermatitis<br>[0.88] |
| Tennessee                     | Drugs<br>[8.23]      | Depression<br>[1.95] | Headaches<br>[1.02]  | Anxiety<br>[1.08]    | Conduct<br>[1.17]   | Back Pain<br>[0.85] | Neonatal<br>[0.83]   | Oth MSK<br>[6.0]     | Dermatitis<br>[1.07] | Acne<br>[1.12]       |
| Texas                         | Depression<br>[1.81] | Headaches<br>[1.01]  | Anxiety<br>[1.07]    | Conduct<br>[1.33]    | Drugs<br>[3.63]     | Back Pain<br>[0.8]  | Neonatal<br>[0.96]   | Dermatitis<br>[1.19] | Acne<br>[1.27]       | Oth MSK<br>[5.46]    |
| Utah                          | Depression<br>[2.24] | Drugs<br>[6.51]      | Headaches<br>[1.01]  | Anxiety<br>[1.06]    | Conduct<br>[1.19]   | Back Pain<br>[0.83] | Neonatal<br>[0.81]   | Acne<br>[1.18]       | Oth MSK<br>[5.72]    | Dermatitis<br>[0.95] |
| Vermont                       | Drugs<br>[5.98]      | Depression<br>[1.89] | Headaches<br>[1.04]  | Anxiety<br>[1.04]    | Conduct<br>[1.23]   | Back Pain<br>[0.77] | Neonatal<br>[0.93]   | Oth MSK<br>[5.92]    | Dermatitis<br>[0.92] | Acne<br>[0.83]       |
| Virginia                      | Depression<br>[1.98] | Headaches<br>[1.03]  | Drugs<br>[4.7]       | Anxiety<br>[1.04]    | Conduct<br>[1.22]   | Back Pain<br>[0.75] | Neonatal<br>[0.95]   | Dermatitis<br>[1.33] | Acne<br>[1.11]       | Oth MSK<br>[5.4]     |
| Washington                    | Depression<br>[2.03] | Drugs<br>[5.64]      | Headaches<br>[1.02]  | Anxiety<br>[1.03]    | Conduct<br>[1.22]   | Back Pain<br>[0.83] | Oth MSK<br>[7.33]    | Neonatal<br>[0.81]   | Dermatitis<br>[1.18] | Acne<br>[1.12]       |
| W Virginia                    | Drugs<br>[12.25]     | Depression<br>[2.0]  | Headaches<br>[1.01]  | Anxiety<br>[1.09]    | Conduct<br>[1.16]   | Back Pain<br>[0.92] | Neonatal<br>[0.83]   | Oth MSK<br>[6.1]     | Dermatitis<br>[1.05] | Acne<br>[1.18]       |
| Wisconsin                     | Depression<br>[1.97] | Drugs<br>[5.96]      | Headaches<br>[1.02]  | Anxiety<br>[1.04]    | Conduct<br>[1.21]   | Back Pain<br>[0.94] | Neonatal<br>[0.93]   | Oth MSK<br>[6.17]    | Acne<br>[1.06]       | Dermatitis<br>[0.92] |
| Wyoming                       | Depression<br>[2.08] | Headaches<br>[1.01]  | Back Pain<br>[1.15]  | Anxiety<br>[1.04]    | Conduct<br>[1.22]   | Drugs<br>[3.5]      | Oth MSK<br>[6.89]    | Neonatal<br>[0.71]   | Dermatitis<br>[0.92] | Acne<br>[0.75]       |
| <b>Southern Latin America</b> | Anxiety<br>[1.36]    | Back Pain<br>[1.36]  | Depression<br>[1.38] | Headaches<br>[0.66]  | Conduct<br>[0.93]   | Neonatal<br>[0.99]  | Dermatitis<br>[1.02] | Drugs<br>[1.82]      | Acne<br>[1.31]       | Asthma<br>[0.9]      |
| Argentina                     | Anxiety<br>[1.38]    | Back Pain<br>[1.23]  | Depression<br>[1.35] | Headaches<br>[0.63]  | Conduct<br>[0.93]   | Neonatal<br>[0.97]  | Dermatitis<br>[0.95] | Drugs<br>[1.87]      | Acne<br>[1.3]        | Asthma<br>[0.89]     |
| Chile                         | Back Pain<br>[1.8]   | Anxiety<br>[1.32]    | Depression<br>[1.51] | Headaches<br>[0.71]  | Conduct<br>[0.92]   | Neonatal<br>[1.01]  | Dermatitis<br>[1.22] | Acne<br>[1.33]       | Drugs<br>[1.73]      | Asthma<br>[0.89]     |
| Uruguay                       | Anxiety<br>[1.39]    | Headaches<br>[0.67]  | Back Pain<br>[1.08]  | Depression<br>[1.12] | Conduct<br>[0.93]   | Neonatal<br>[1.03]  | Dermatitis<br>[0.93] | Asthma<br>[1.05]     | Iron<br>[1.1]        | Acne<br>[1.37]       |
| <b>Western Europe</b>         | Headaches<br>[1.0]   | Anxiety<br>[1.24]    | Back Pain<br>[1.1]   | Depression<br>[1.09] | Conduct<br>[0.91]   | Neonatal<br>[0.81]  | Acne<br>[1.34]       | Dermatitis<br>[1.13] | Asthma<br>[1.11]     | Falls<br>[0.94]      |

**eFigure 9e. Leading ten causes of YLDs with the ratio of observed YLDs to YLDs expected on the basis of Socio-Demographic Index alone in 2017, 10-19 years, both sexes combined.** The top ten causes contributing to YLDs are listed globally, by socio-demographic quintile, and then by GBD superregion, region, country, and subnationally where modeled. For each cell, the ratio of observed YLDs to YLDs expected on the basis of socio-demographic index (SDI) alone are listed. Abbreviations: YLD=year of life lived with disability, GBD=Global Burden of Disease.

Values shown in brackets represent the ratio of observed YLDs to predicted YLDs on the basis of Socio-Demographic Index (SDI), rounded to two (2) digits. Color ranges (shown below) were calculated to place a roughly equal number of cells into each bin.

| COLOR KEY:           |                     | [0.0-0.77]          | [0.77-0.91]          | [0.91-0.97]          | [0.97-1.02]          | [1.02-1.1]           | [1.1-1.25]           | [1.25-1.48]          | [1.48-1.87]          | 1.87+                |
|----------------------|---------------------|---------------------|----------------------|----------------------|----------------------|----------------------|----------------------|----------------------|----------------------|----------------------|
|                      | 1                   | 2                   | 3                    | 4                    | 5                    | 6                    | 7                    | 8                    | 9                    | 10                   |
| Andorra              | Headaches<br>[1.02] | Anxiety<br>[1.14]   | Back Pain<br>[1.06]  | Depression<br>[1.05] | Conduct<br>[0.92]    | Dermatitis<br>[1.4]  | Acne<br>[1.27]       | Neonatal<br>[0.84]   | Asthma<br>[1.19]     | Falls<br>[0.86]      |
| Austria              | Headaches<br>[1.04] | Anxiety<br>[1.17]   | Neonatal<br>[1.36]   | Back Pain<br>[0.86]  | Conduct<br>[0.89]    | Depression<br>[0.77] | Acne<br>[1.35]       | Falls<br>[0.95]      | Asthma<br>[0.96]     | Bipolar<br>[1.11]    |
| Belgium              | Headaches<br>[1.25] | Anxiety<br>[1.13]   | Back Pain<br>[0.94]  | Depression<br>[1.05] | Conduct<br>[0.91]    | Acne<br>[1.14]       | Falls<br>[1.02]      | Dermatitis<br>[0.95] | Neonatal<br>[0.55]   | Bipolar<br>[1.09]    |
| Cyprus               | Headaches<br>[1.02] | Anxiety<br>[1.18]   | Back Pain<br>[1.13]  | Neonatal<br>[1.09]   | Depression<br>[1.0]  | Conduct<br>[0.89]    | Acne<br>[1.29]       | Falls<br>[0.92]      | Asthma<br>[0.98]     | Bipolar<br>[1.12]    |
| Denmark              | Back Pain<br>[1.38] | Anxiety<br>[1.13]   | Headaches<br>[0.85]  | Conduct<br>[0.91]    | Dermatitis<br>[1.45] | Depression<br>[0.79] | Acne<br>[1.2]        | Neonatal<br>[0.66]   | Asthma<br>[1.05]     | Falls<br>[0.82]      |
| Finland              | Headaches<br>[1.01] | Neonatal<br>[1.7]   | Depression<br>[1.37] | Anxiety<br>[0.83]    | Conduct<br>[0.9]     | Dermatitis<br>[1.48] | Back Pain<br>[0.62]  | Acne<br>[1.27]       | Falls<br>[1.09]      | Asthma<br>[1.1]      |
| France               | Anxiety<br>[1.41]   | Headaches<br>[0.83] | Back Pain<br>[1.08]  | Depression<br>[1.12] | Conduct<br>[0.9]     | Acne<br>[1.48]       | Dermatitis<br>[1.31] | Neonatal<br>[0.64]   | Asthma<br>[1.09]     | Falls<br>[0.94]      |
| Germany              | Anxiety<br>[1.4]    | Back Pain<br>[1.38] | Headaches<br>[0.87]  | Depression<br>[1.04] | Conduct<br>[0.9]     | Neonatal<br>[0.92]   | Acne<br>[1.16]       | Dermatitis<br>[0.91] | Falls<br>[0.93]      | Asthma<br>[0.8]      |
| Greece               | Headaches<br>[1.19] | Anxiety<br>[1.33]   | Depression<br>[1.35] | Back Pain<br>[0.95]  | Conduct<br>[0.87]    | Neonatal<br>[0.86]   | Acne<br>[1.49]       | Falls<br>[1.03]      | Asthma<br>[0.95]     | Bipolar<br>[1.11]    |
| Iceland              | Headaches<br>[1.02] | Anxiety<br>[1.14]   | Back Pain<br>[1.01]  | Dermatitis<br>[1.55] | Conduct<br>[0.92]    | Depression<br>[0.88] | Asthma<br>[1.65]     | Acne<br>[1.3]        | Neonatal<br>[0.85]   | Falls<br>[0.84]      |
| Ireland              | Headaches<br>[1.01] | Anxiety<br>[1.27]   | Depression<br>[1.21] | Back Pain<br>[0.81]  | Conduct<br>[0.9]     | Asthma<br>[1.45]     | Acne<br>[1.27]       | Dermatitis<br>[1.22] | Neonatal<br>[0.72]   | Falls<br>[0.91]      |
| Israel               | Headaches<br>[0.99] | Back Pain<br>[1.17] | Depression<br>[1.14] | Anxiety<br>[0.74]    | Neonatal<br>[0.95]   | Conduct<br>[0.87]    | Acne<br>[1.29]       | Blindness<br>[3.01]  | Dermatitis<br>[1.03] | Falls<br>[1.07]      |
| Italy                | Headaches<br>[1.24] | Anxiety<br>[1.26]   | Back Pain<br>[1.01]  | Depression<br>[1.08] | Conduct<br>[0.89]    | Acne<br>[1.39]       | Neonatal<br>[0.64]   | Dermatitis<br>[0.94] | Bipolar<br>[1.1]     | Falls<br>[0.82]      |
| Luxembourg           | Headaches<br>[1.17] | Anxiety<br>[1.13]   | Back Pain<br>[0.99]  | Neonatal<br>[1.1]    | Depression<br>[0.96] | Conduct<br>[0.93]    | Dermatitis<br>[1.41] | Acne<br>[1.27]       | Asthma<br>[1.29]     | Falls<br>[0.81]      |
| Malta                | Headaches<br>[1.02] | Anxiety<br>[1.21]   | Back Pain<br>[1.12]  | Depression<br>[1.02] | Conduct<br>[0.87]    | Acne<br>[1.37]       | Neonatal<br>[0.71]   | Falls<br>[1.18]      | Asthma<br>[1.11]     | Congenital<br>[1.21] |
| Netherlands          | Anxiety<br>[1.39]   | Headaches<br>[1.06] | Depression<br>[1.08] | Back Pain<br>[0.8]   | Conduct<br>[1.01]    | Acne<br>[1.27]       | Neonatal<br>[0.85]   | Dermatitis<br>[1.25] | Asthma<br>[1.19]     | Bipolar<br>[1.06]    |
| Norway               | Anxiety<br>[1.58]   | Headaches<br>[1.07] | Back Pain<br>[0.95]  | Depression<br>[1.02] | Conduct<br>[1.0]     | Neonatal<br>[1.0]    | Dermatitis<br>[1.44] | Acne<br>[1.29]       | Asthma<br>[1.49]     | Falls<br>[1.1]       |
| Portugal             | Headaches<br>[1.0]  | Anxiety<br>[1.27]   | Depression<br>[1.28] | Back Pain<br>[1.11]  | Conduct<br>[0.85]    | Asthma<br>[1.65]     | Acne<br>[1.49]       | Neonatal<br>[0.6]    | Dermatitis<br>[0.86] | Bipolar<br>[1.14]    |
| Spain                | Headaches<br>[1.18] | Anxiety<br>[1.15]   | Back Pain<br>[1.19]  | Depression<br>[1.03] | Conduct<br>[0.88]    | Acne<br>[1.36]       | Neonatal<br>[0.7]    | Drugs<br>[1.57]      | Falls<br>[0.96]      | Asthma<br>[0.92]     |
| Sweden               | Headaches<br>[1.06] | Anxiety<br>[1.14]   | Depression<br>[1.22] | Back Pain<br>[0.92]  | Dermatitis<br>[1.85] | Conduct<br>[1.01]    | Acne<br>[1.51]       | Asthma<br>[1.65]     | Neonatal<br>[0.75]   | Falls<br>[1.15]      |
| Stockholm            | Headaches<br>[1.06] | Anxiety<br>[1.12]   | Conduct<br>[1.04]    | Depression<br>[0.99] | Acne<br>[1.43]       | Dermatitis<br>[1.46] | Back Pain<br>[0.61]  | Asthma<br>[1.42]     | Falls<br>[1.07]      | Neonatal<br>[0.73]   |
| Sweden w/o Stockholm | Headaches<br>[1.06] | Anxiety<br>[1.15]   | Depression<br>[1.28] | Back Pain<br>[1.01]  | Dermatitis<br>[1.96] | Conduct<br>[1.0]     | Asthma<br>[1.72]     | Acne<br>[1.53]       | Neonatal<br>[0.76]   | Falls<br>[1.18]      |
| Switzerland          | Back Pain<br>[2.12] | Anxiety<br>[1.15]   | Headaches<br>[0.86]  | Depression<br>[0.95] | Conduct<br>[0.91]    | Dermatitis<br>[1.4]  | Neonatal<br>[0.83]   | Acne<br>[1.28]       | Asthma<br>[1.1]      | Bipolar<br>[1.11]    |
| UK                   | Headaches<br>[0.93] | Anxiety<br>[1.04]   | Depression<br>[1.11] | Back Pain<br>[0.92]  | Conduct<br>[0.98]    | Neonatal<br>[0.98]   | Dermatitis<br>[1.56] | Asthma<br>[1.73]     | Acne<br>[1.33]       | Drugs<br>[2.14]      |
| England              | Headaches<br>[0.92] | Anxiety<br>[1.0]    | Back Pain<br>[0.92]  | Depression<br>[1.1]  | Conduct<br>[1.0]     | Neonatal<br>[1.01]   | Dermatitis<br>[1.59] | Asthma<br>[1.75]     | Acne<br>[1.32]       | Drugs<br>[2.22]      |
| E Midlands           | Headaches<br>[0.93] | Anxiety<br>[1.02]   | Depression<br>[1.1]  | Back Pain<br>[0.93]  | Conduct<br>[0.99]    | Neonatal<br>[0.96]   | Dermatitis<br>[1.55] | Asthma<br>[1.68]     | Acne<br>[1.37]       | Drugs<br>[2.26]      |
| Derby                | Headaches<br>[0.92] | Anxiety<br>[1.01]   | Back Pain<br>[0.94]  | Depression<br>[1.09] | Conduct<br>[1.0]     | Neonatal<br>[0.96]   | Dermatitis<br>[1.55] | Asthma<br>[1.68]     | Acne<br>[1.3]        | Drugs<br>[2.24]      |
| Derbyshire           | Headaches<br>[0.92] | Anxiety<br>[1.04]   | Depression<br>[1.1]  | Conduct<br>[0.98]    | Back Pain<br>[0.83]  | Dermatitis<br>[1.56] | Asthma<br>[1.68]     | Neonatal<br>[0.89]   | Acne<br>[1.41]       | Drugs<br>[2.31]      |
| Leicester            | Headaches<br>[0.93] | Anxiety<br>[1.01]   | Back Pain<br>[0.95]  | Depression<br>[1.11] | Conduct<br>[0.99]    | Dermatitis<br>[1.55] | Asthma<br>[1.69]     | Neonatal<br>[0.82]   | Drugs<br>[2.28]      | Acne<br>[1.32]       |
| Leicestershire       | Headaches<br>[0.93] | Anxiety<br>[1.01]   | Back Pain<br>[0.95]  | Depression<br>[1.1]  | Conduct<br>[1.0]     | Dermatitis<br>[1.55] | Asthma<br>[1.66]     | Neonatal<br>[0.8]    | Acne<br>[1.39]       | Drugs<br>[2.26]      |
| Lincolnshire         | Headaches<br>[0.93] | Anxiety<br>[1.05]   | Back Pain<br>[0.96]  | Depression<br>[1.11] | Conduct<br>[0.97]    | Neonatal<br>[0.96]   | Dermatitis<br>[1.55] | Asthma<br>[1.68]     | Acne<br>[1.44]       | Drugs<br>[2.31]      |

**eFigure 9e. Leading ten causes of YLDs with the ratio of observed YLDs to YLDs expected on the basis of Socio-Demographic Index alone in 2017, 10-19 years, both sexes combined.** The top ten causes contributing to YLDs are listed globally, by socio-demographic quintile, and then by GBD superregion, region, country, and subnationally where modeled. For each cell, the ratio of observed YLDs to YLDs expected on the basis of socio-demographic index (SDI) alone are listed. Abbreviations: YLD=year of life lived with disability, GBD=Global Burden of Disease.

Values shown in brackets represent the ratio of observed YLDs to predicted YLDs on the basis of Socio-Demographic Index (SDI), rounded to two (2) digits. Color ranges (shown below) were calculated to place a roughly equal number of cells into each bin.

| COLOR KEY:           |                     | [0.0-0.77]        | [0.77-0.91]          | [0.91-0.97]          | [0.97-1.02]          | [1.02-1.1]           | [1.1-1.25]           | [1.25-1.48]          | [1.48-1.87]     | 1.87+              |
|----------------------|---------------------|-------------------|----------------------|----------------------|----------------------|----------------------|----------------------|----------------------|-----------------|--------------------|
|                      | 1                   | 2                 | 3                    | 4                    | 5                    | 6                    | 7                    | 8                    | 9               | 10                 |
| Northamptonshire     | Headaches<br>[0.91] | Anxiety<br>[1.02] | Back Pain<br>[0.94]  | Depression<br>[1.08] | Conduct<br>[0.99]    | Neonatal<br>[1.06]   | Dermatitis<br>[1.57] | Asthma<br>[1.68]     | Acne<br>[1.35]  | Drugs<br>[2.16]    |
| Nottingham           | Headaches<br>[0.96] | Anxiety<br>[1.0]  | Back Pain<br>[0.97]  | Depression<br>[1.13] | Neonatal<br>[1.16]   | Conduct<br>[1.0]     | Dermatitis<br>[1.54] | Asthma<br>[1.71]     | Drugs<br>[2.36] | Acne<br>[1.3]      |
| Nottinghamshire      | Headaches<br>[0.91] | Anxiety<br>[1.03] | Back Pain<br>[0.95]  | Depression<br>[1.09] | Conduct<br>[0.98]    | Neonatal<br>[1.07]   | Dermatitis<br>[1.55] | Asthma<br>[1.68]     | Acne<br>[1.39]  | Drugs<br>[2.23]    |
| Rutland              | Headaches<br>[0.93] | Anxiety<br>[1.01] | Back Pain<br>[0.96]  | Depression<br>[1.12] | Conduct<br>[0.99]    | Dermatitis<br>[1.53] | Asthma<br>[1.67]     | Acne<br>[1.42]       | Drugs<br>[2.39] | Neonatal<br>[0.67] |
| E England            | Headaches<br>[0.92] | Anxiety<br>[1.01] | Depression<br>[1.09] | Back Pain<br>[0.92]  | Conduct<br>[1.0]     | Dermatitis<br>[1.55] | Asthma<br>[1.67]     | Neonatal<br>[0.92]   | Acne<br>[1.37]  | Drugs<br>[2.21]    |
| Bedford              | Headaches<br>[0.92] | Anxiety<br>[1.01] | Back Pain<br>[0.94]  | Depression<br>[1.09] | Neonatal<br>[0.99]   | Conduct<br>[1.13]    | Dermatitis<br>[1.55] | Asthma<br>[1.66]     | Acne<br>[1.35]  | Drugs<br>[2.26]    |
| Cambridgeshire       | Headaches<br>[0.93] | Anxiety<br>[0.99] | Depression<br>[1.1]  | Back Pain<br>[0.86]  | Conduct<br>[1.02]    | Dermatitis<br>[1.55] | Asthma<br>[1.67]     | Neonatal<br>[0.92]   | Acne<br>[1.35]  | Drugs<br>[2.21]    |
| Cen Bedfordshire     | Headaches<br>[0.91] | Anxiety<br>[1.01] | Back Pain<br>[0.92]  | Depression<br>[1.08] | Conduct<br>[1.0]     | Neonatal<br>[1.0]    | Dermatitis<br>[1.56] | Asthma<br>[1.66]     | Acne<br>[1.37]  | Drugs<br>[2.16]    |
| Essex                | Headaches<br>[0.92] | Anxiety<br>[1.02] | Back Pain<br>[0.93]  | Depression<br>[1.09] | Conduct<br>[0.99]    | Dermatitis<br>[1.55] | Neonatal<br>[0.91]   | Asthma<br>[1.67]     | Acne<br>[1.4]   | Drugs<br>[2.25]    |
| Hertfordshire        | Headaches<br>[0.92] | Anxiety<br>[0.99] | Back Pain<br>[0.91]  | Depression<br>[1.08] | Conduct<br>[1.02]    | Dermatitis<br>[1.56] | Asthma<br>[1.66]     | Neonatal<br>[0.9]    | Acne<br>[1.3]   | Drugs<br>[2.09]    |
| Luton                | Headaches<br>[0.91] | Anxiety<br>[1.01] | Back Pain<br>[0.92]  | Depression<br>[1.07] | Conduct<br>[1.0]     | Neonatal<br>[1.04]   | Dermatitis<br>[1.57] | Asthma<br>[1.7]      | Acne<br>[1.28]  | Drugs<br>[2.07]    |
| Norfolk              | Headaches<br>[0.93] | Anxiety<br>[1.03] | Back Pain<br>[0.95]  | Depression<br>[1.1]  | Conduct<br>[0.98]    | Dermatitis<br>[1.55] | Asthma<br>[1.68]     | Neonatal<br>[0.78]   | Acne<br>[1.43]  | Drugs<br>[2.36]    |
| Peterborough         | Headaches<br>[0.91] | Anxiety<br>[1.03] | Back Pain<br>[0.93]  | Depression<br>[1.07] | Conduct<br>[0.99]    | Dermatitis<br>[1.56] | Asthma<br>[1.73]     | Neonatal<br>[0.73]   | Acne<br>[1.35]  | Drugs<br>[2.21]    |
| Southend-on-Sea      | Headaches<br>[0.91] | Anxiety<br>[1.04] | Depression<br>[1.09] | Back Pain<br>[0.92]  | Neonatal<br>[1.11]   | Conduct<br>[0.98]    | Dermatitis<br>[1.56] | Asthma<br>[1.68]     | Drugs<br>[2.35] | Acne<br>[1.4]      |
| Suffolk              | Headaches<br>[0.91] | Anxiety<br>[1.03] | Depression<br>[1.09] | Back Pain<br>[0.93]  | Conduct<br>[0.98]    | Neonatal<br>[0.97]   | Dermatitis<br>[1.55] | Asthma<br>[1.67]     | Acne<br>[1.42]  | Drugs<br>[2.24]    |
| Thurrock             | Headaches<br>[0.91] | Anxiety<br>[1.04] | Depression<br>[1.08] | Back Pain<br>[0.91]  | Conduct<br>[0.98]    | Neonatal<br>[1.03]   | Dermatitis<br>[1.57] | Asthma<br>[1.71]     | Acne<br>[1.39]  | Drugs<br>[2.15]    |
| Greater London       | Headaches<br>[0.93] | Anxiety<br>[0.97] | Back Pain<br>[0.91]  | Depression<br>[1.08] | Asthma<br>[1.96]     | Conduct<br>[1.04]    | Neonatal<br>[1.04]   | Dermatitis<br>[1.58] | Acne<br>[1.2]   | Drugs<br>[2.07]    |
| Barking & Dagenham   | Headaches<br>[0.9]  | Anxiety<br>[1.04] | Dermatitis<br>[2.06] | Back Pain<br>[0.94]  | Depression<br>[1.07] | Conduct<br>[0.98]    | Asthma<br>[1.97]     | Neonatal<br>[1.02]   | Drugs<br>[2.14] | Acne<br>[1.34]     |
| Barnet               | Headaches<br>[0.91] | Anxiety<br>[0.99] | Back Pain<br>[0.91]  | Depression<br>[1.07] | Conduct<br>[1.02]    | Asthma<br>[1.95]     | Neonatal<br>[0.98]   | Dermatitis<br>[1.56] | Acne<br>[1.3]   | Drugs<br>[2.08]    |
| Bexley               | Headaches<br>[0.92] | Anxiety<br>[1.03] | Back Pain<br>[0.95]  | Depression<br>[1.1]  | Asthma<br>[1.98]     | Conduct<br>[0.98]    | Dermatitis<br>[1.56] | Neonatal<br>[0.95]   | Acne<br>[1.41]  | Drugs<br>[2.22]    |
| Brent                | Headaches<br>[0.91] | Anxiety<br>[1.0]  | Back Pain<br>[0.92]  | Depression<br>[1.07] | Conduct<br>[1.01]    | Asthma<br>[1.97]     | Neonatal<br>[1.05]   | Dermatitis<br>[1.56] | Acne<br>[1.32]  | Drugs<br>[2.11]    |
| Bromley              | Headaches<br>[0.92] | Anxiety<br>[1.0]  | Back Pain<br>[0.93]  | Depression<br>[1.08] | Neonatal<br>[1.12]   | Conduct<br>[1.0]     | Asthma<br>[1.95]     | Dermatitis<br>[1.56] | Acne<br>[1.35]  | Drugs<br>[2.14]    |
| Camden               | Headaches<br>[0.97] | Anxiety<br>[0.96] | Back Pain<br>[0.94]  | Depression<br>[1.13] | Asthma<br>[1.99]     | Conduct<br>[1.05]    | Dermatitis<br>[1.57] | Neonatal<br>[0.88]   | Acne<br>[1.24]  | Drugs<br>[2.25]    |
| Croydon              | Headaches<br>[0.92] | Anxiety<br>[1.02] | Back Pain<br>[0.93]  | Depression<br>[1.08] | Asthma<br>[1.96]     | Conduct<br>[0.99]    | Neonatal<br>[1.01]   | Dermatitis<br>[1.57] | Acne<br>[1.34]  | Drugs<br>[2.1]     |
| Ealing               | Headaches<br>[0.91] | Anxiety<br>[0.99] | Back Pain<br>[0.91]  | Depression<br>[1.07] | Neonatal<br>[1.13]   | Conduct<br>[1.02]    | Asthma<br>[1.96]     | Dermatitis<br>[1.57] | Acne<br>[1.27]  | Drugs<br>[2.05]    |
| Enfield              | Headaches<br>[0.91] | Anxiety<br>[1.01] | Back Pain<br>[0.93]  | Depression<br>[1.07] | Conduct<br>[1.0]     | Asthma<br>[1.96]     | Neonatal<br>[1.05]   | Dermatitis<br>[1.56] | Acne<br>[1.34]  | Drugs<br>[2.11]    |
| Greenwich            | Headaches<br>[0.92] | Anxiety<br>[1.02] | Back Pain<br>[0.94]  | Depression<br>[1.09] | Conduct<br>[0.99]    | Asthma<br>[1.95]     | Neonatal<br>[0.97]   | Dermatitis<br>[1.56] | Acne<br>[1.34]  | Drugs<br>[2.16]    |
| Hackney              | Headaches<br>[0.93] | Anxiety<br>[0.98] | Back Pain<br>[0.92]  | Depression<br>[1.08] | Asthma<br>[2.07]     | Conduct<br>[1.03]    | Neonatal<br>[1.01]   | Dermatitis<br>[1.57] | Acne<br>[1.21]  | Drugs<br>[2.11]    |
| Hammersmith & Fulham | Headaches<br>[0.95] | Anxiety<br>[0.95] | Back Pain<br>[0.91]  | Depression<br>[1.1]  | Asthma<br>[1.99]     | Conduct<br>[1.06]    | Neonatal<br>[0.99]   | Dermatitis<br>[1.58] | Acne<br>[1.19]  | Drugs<br>[2.11]    |
| Haringey             | Headaches<br>[0.91] | Anxiety<br>[1.0]  | Back Pain<br>[0.92]  | Depression<br>[1.07] | Neonatal<br>[1.1]    | Conduct<br>[1.01]    | Asthma<br>[1.96]     | Dermatitis<br>[1.56] | Acne<br>[1.29]  | Drugs<br>[2.1]     |
| Harrow               | Headaches<br>[0.91] | Anxiety<br>[1.0]  | Back Pain<br>[0.92]  | Depression<br>[1.08] | Neonatal<br>[1.15]   | Conduct<br>[1.01]    | Asthma<br>[1.95]     | Dermatitis<br>[1.56] | Acne<br>[1.34]  | Drugs<br>[2.14]    |

**eFigure 9e. Leading ten causes of YLDs with the ratio of observed YLDs to YLDs expected on the basis of Socio-Demographic Index alone in 2017, 10-19 years, both sexes combined.** The top ten causes contributing to YLDs are listed globally, by socio-demographic quintile, and then by GBD superregion, region, country, and subnationally where modeled. For each cell, the ratio of observed YLDs to YLDs expected on the basis of socio-demographic index (SDI) alone are listed. Abbreviations: YLD=year of life lived with disability, GBD=Global Burden of Disease.

Values shown in brackets represent the ratio of observed YLDs to predicted YLDs on the basis of Socio-Demographic Index (SDI), rounded to two (2) digits. Color ranges (shown below) were calculated to place a roughly equal number of cells into each bin.

| COLOR KEY:           |                     | [0.0-0.77]        | [0.77-0.91]          | [0.91-0.97]          | [0.97-1.02]          | [1.02-1.1]           | [1.1-1.25]           | [1.25-1.48]          | [1.48-1.87]        | 1.87+             |
|----------------------|---------------------|-------------------|----------------------|----------------------|----------------------|----------------------|----------------------|----------------------|--------------------|-------------------|
|                      | 1                   | 2                 | 3                    | 4                    | 5                    | 6                    | 7                    | 8                    | 9                  | 10                |
| Havering             | Headaches<br>[0.93] | Anxiety<br>[1.03] | Back Pain<br>[0.96]  | Depression<br>[1.1]  | Asthma<br>[1.98]     | Conduct<br>[0.98]    | Neonatal<br>[1.0]    | Dermatitis<br>[1.55] | Acne<br>[1.4]      | Drugs<br>[2.23]   |
| Hillingdon           | Headaches<br>[0.93] | Anxiety<br>[0.98] | Back Pain<br>[0.93]  | Depression<br>[1.1]  | Neonatal<br>[1.15]   | Asthma<br>[1.99]     | Conduct<br>[1.02]    | Dermatitis<br>[1.56] | Acne<br>[1.29]     | Drugs<br>[2.16]   |
| Hounslow             | Headaches<br>[0.92] | Anxiety<br>[0.98] | Back Pain<br>[0.91]  | Depression<br>[1.08] | Asthma<br>[1.97]     | Conduct<br>[1.03]    | Neonatal<br>[1.09]   | Dermatitis<br>[1.57] | Acne<br>[1.24]     | Drugs<br>[2.03]   |
| Islington            | Headaches<br>[0.96] | Anxiety<br>[0.96] | Back Pain<br>[1.11]  | Depression<br>[1.11] | Asthma<br>[2.01]     | Conduct<br>[1.04]    | Dermatitis<br>[1.58] | Neonatal<br>[0.86]   | Acne<br>[1.2]      | Drugs<br>[2.19]   |
| Kensington & Chelsea | Headaches<br>[0.96] | Anxiety<br>[0.95] | Back Pain<br>[0.92]  | Depression<br>[1.12] | Asthma<br>[1.97]     | Conduct<br>[1.05]    | Dermatitis<br>[1.58] | Acne<br>[1.25]       | Neonatal<br>[0.85] | Drugs<br>[2.24]   |
| Kingston upon Thames | Headaches<br>[0.95] | Anxiety<br>[0.98] | Back Pain<br>[0.93]  | Depression<br>[1.11] | Asthma<br>[1.96]     | Neonatal<br>[1.08]   | Conduct<br>[1.02]    | Dermatitis<br>[1.57] | Acne<br>[1.29]     | Drugs<br>[2.12]   |
| Lambeth              | Headaches<br>[0.94] | Anxiety<br>[0.97] | Back Pain<br>[0.91]  | Depression<br>[1.08] | Asthma<br>[1.96]     | Conduct<br>[1.04]    | Dermatitis<br>[1.58] | Acne<br>[1.19]       | Neonatal<br>[0.73] | Drugs<br>[2.06]   |
| Lewisham             | Headaches<br>[0.92] | Anxiety<br>[1.01] | Neonatal<br>[1.21]   | Back Pain<br>[0.93]  | Depression<br>[1.08] | Conduct<br>[1.0]     | Asthma<br>[1.96]     | Dermatitis<br>[1.56] | Acne<br>[1.29]     | Drugs<br>[2.11]   |
| Merton               | Headaches<br>[0.91] | Anxiety<br>[0.98] | Back Pain<br>[0.9]   | Depression<br>[1.07] | Conduct<br>[1.03]    | Asthma<br>[1.95]     | Neonatal<br>[1.04]   | Dermatitis<br>[1.56] | Acne<br>[1.26]     | Drugs<br>[2.04]   |
| Newham               | Headaches<br>[0.93] | Anxiety<br>[1.02] | Back Pain<br>[0.95]  | Depression<br>[1.1]  | Neonatal<br>[1.08]   | Asthma<br>[1.96]     | Conduct<br>[0.99]    | Dermatitis<br>[1.56] | Acne<br>[1.32]     | Drugs<br>[2.17]   |
| Redbridge            | Headaches<br>[0.9]  | Anxiety<br>[1.02] | Back Pain<br>[0.93]  | Depression<br>[1.07] | Conduct<br>[1.0]     | Asthma<br>[1.96]     | Neonatal<br>[1.01]   | Dermatitis<br>[1.56] | Acne<br>[1.34]     | Drugs<br>[2.1]    |
| Richmond upon Thames | Headaches<br>[0.93] | Anxiety<br>[0.97] | Back Pain<br>[0.9]   | Depression<br>[1.07] | Neonatal<br>[1.14]   | Conduct<br>[1.04]    | Asthma<br>[1.94]     | Dermatitis<br>[1.58] | Acne<br>[1.23]     | Drugs<br>[1.98]   |
| Southwark            | Headaches<br>[0.94] | Anxiety<br>[0.96] | Back Pain<br>[0.91]  | Depression<br>[1.1]  | Asthma<br>[1.98]     | Conduct<br>[1.05]    | Dermatitis<br>[1.58] | Acne<br>[1.19]       | Neonatal<br>[0.75] | Drugs<br>[2.07]   |
| Sutton               | Headaches<br>[0.92] | Anxiety<br>[1.01] | Neonatal<br>[1.29]   | Back Pain<br>[0.93]  | Depression<br>[1.09] | Asthma<br>[1.96]     | Conduct<br>[1.0]     | Dermatitis<br>[1.56] | Acne<br>[1.35]     | Drugs<br>[2.14]   |
| Tower Hamlets        | Headaches<br>[0.94] | Anxiety<br>[0.96] | Back Pain<br>[0.92]  | Depression<br>[1.09] | Asthma<br>[2.02]     | Neonatal<br>[1.11]   | Conduct<br>[1.04]    | Dermatitis<br>[1.57] | Acne<br>[1.19]     | Drugs<br>[2.09]   |
| Waltham Forest       | Headaches<br>[0.91] | Anxiety<br>[1.03] | Back Pain<br>[0.93]  | Depression<br>[1.08] | Conduct<br>[0.99]    | Asthma<br>[1.95]     | Neonatal<br>[1.02]   | Dermatitis<br>[1.57] | Acne<br>[1.35]     | Drugs<br>[2.15]   |
| Wandsworth           | Headaches<br>[0.94] | Anxiety<br>[0.96] | Back Pain<br>[0.9]   | Depression<br>[1.09] | Asthma<br>[1.95]     | Conduct<br>[1.04]    | Dermatitis<br>[1.59] | Neonatal<br>[0.9]    | Acne<br>[1.19]     | Drugs<br>[1.99]   |
| Westminster          | Headaches<br>[0.95] | Anxiety<br>[0.95] | Back Pain<br>[0.93]  | Depression<br>[1.11] | Asthma<br>[2.04]     | Conduct<br>[1.06]    | Dermatitis<br>[1.56] | Acne<br>[1.23]       | Drugs<br>[2.31]    | Neonatal<br>[0.8] |
| NE England           | Headaches<br>[0.92] | Anxiety<br>[1.03] | Depression<br>[1.1]  | Back Pain<br>[0.94]  | Conduct<br>[0.98]    | Dermatitis<br>[1.68] | Asthma<br>[1.7]      | Neonatal<br>[0.91]   | Drugs<br>[2.38]    | Acne<br>[1.38]    |
| County Durham        | Headaches<br>[0.93] | Anxiety<br>[1.04] | Depression<br>[1.11] | Dermatitis<br>[1.87] | Back Pain<br>[0.89]  | Conduct<br>[0.97]    | Neonatal<br>[0.98]   | Asthma<br>[1.73]     | Drugs<br>[2.41]    | Acne<br>[1.41]    |
| Darlington           | Headaches<br>[0.92] | Anxiety<br>[1.03] | Back Pain<br>[0.95]  | Depression<br>[1.09] | Conduct<br>[0.99]    | Dermatitis<br>[1.56] | Asthma<br>[1.73]     | Neonatal<br>[0.88]   | Acne<br>[1.34]     | Drugs<br>[2.21]   |
| Gateshead            | Headaches<br>[0.92] | Anxiety<br>[1.03] | Back Pain<br>[0.96]  | Depression<br>[1.1]  | Dermatitis<br>[1.85] | Conduct<br>[0.98]    | Neonatal<br>[1.01]   | Asthma<br>[1.73]     | Drugs<br>[2.4]     | Acne<br>[1.35]    |
| Hartlepool           | Headaches<br>[0.92] | Anxiety<br>[1.05] | Back Pain<br>[0.96]  | Depression<br>[1.11] | Conduct<br>[0.96]    | Neonatal<br>[1.05]   | Dermatitis<br>[1.55] | Asthma<br>[1.75]     | Drugs<br>[2.55]    | Acne<br>[1.41]    |
| Middlesbrough        | Headaches<br>[0.92] | Anxiety<br>[1.04] | Back Pain<br>[0.95]  | Depression<br>[1.1]  | Conduct<br>[0.97]    | Dermatitis<br>[1.55] | Asthma<br>[1.75]     | Neonatal<br>[0.8]    | Drugs<br>[2.42]    | Acne<br>[1.37]    |
| Newcastle upon Tyne  | Headaches<br>[0.96] | Anxiety<br>[0.99] | Back Pain<br>[0.97]  | Depression<br>[1.14] | Conduct<br>[1.0]     | Asthma<br>[1.72]     | Dermatitis<br>[1.53] | Drugs<br>[2.48]      | Neonatal<br>[0.84] | Acne<br>[1.35]    |
| N Tyneside           | Headaches<br>[0.91] | Anxiety<br>[1.02] | Back Pain<br>[0.93]  | Depression<br>[1.08] | Conduct<br>[0.99]    | Dermatitis<br>[1.56] | Asthma<br>[1.7]      | Neonatal<br>[0.84]   | Drugs<br>[2.24]    | Acne<br>[1.34]    |
| Northumberland       | Headaches<br>[0.91] | Anxiety<br>[1.03] | Back Pain<br>[0.94]  | Depression<br>[1.09] | Conduct<br>[0.98]    | Dermatitis<br>[1.55] | Asthma<br>[1.71]     | Neonatal<br>[0.88]   | Drugs<br>[2.38]    | Acne<br>[1.41]    |
| Redcar & Cleveland   | Headaches<br>[0.92] | Anxiety<br>[1.05] | Depression<br>[1.1]  | Back Pain<br>[0.95]  | Conduct<br>[0.97]    | Dermatitis<br>[1.55] | Asthma<br>[1.72]     | Neonatal<br>[0.83]   | Drugs<br>[2.38]    | Acne<br>[1.45]    |
| S Tyneside           | Headaches<br>[0.93] | Anxiety<br>[1.06] | Back Pain<br>[1.11]  | Depression<br>[1.11] | Dermatitis<br>[1.87] | Conduct<br>[0.96]    | Asthma<br>[1.72]     | Neonatal<br>[0.88]   | Drugs<br>[2.39]    | Acne<br>[1.45]    |
| Stockton-on-Tees     | Headaches<br>[0.91] | Anxiety<br>[1.02] | Back Pain<br>[0.94]  | Depression<br>[1.09] | Neonatal<br>[1.12]   | Conduct<br>[0.99]    | Dermatitis<br>[1.55] | Asthma<br>[1.72]     | Drugs<br>[2.34]    | Acne<br>[1.36]    |
| Sunderland           | Headaches<br>[0.92] | Anxiety<br>[1.03] | Back Pain<br>[0.95]  | Depression<br>[1.1]  | Dermatitis<br>[1.87] | Conduct<br>[0.98]    | Asthma<br>[1.51]     | Neonatal<br>[0.77]   | Drugs<br>[2.38]    | Acne<br>[1.39]    |

**eFigure 9e. Leading ten causes of YLDs with the ratio of observed YLDs to YLDs expected on the basis of Socio-Demographic Index alone in 2017, 10-19 years, both sexes combined.** The top ten causes contributing to YLDs are listed globally, by socio-demographic quintile, and then by GBD superregion, region, country, and subnationally where modeled. For each cell, the ratio of observed YLDs to YLDs expected on the basis of socio-demographic index (SDI) alone are listed. Abbreviations: YLD=year of life lived with disability, GBD=Global Burden of Disease.

Values shown in brackets represent the ratio of observed YLDs to predicted YLDs on the basis of Socio-Demographic Index (SDI), rounded to two (2) digits. Color ranges (shown below) were calculated to place a roughly equal number of cells into each bin.

| COLOR KEY:            |           | [0.0-0.77] | [0.77-0.91] | [0.91-0.97] | [0.97-1.02] | [1.02-1.1] | [1.1-1.25] | [1.25-1.48] | [1.48-1.87] | 1.87+  |    |
|-----------------------|-----------|------------|-------------|-------------|-------------|------------|------------|-------------|-------------|--------|----|
|                       |           | 1          | 2           | 3           | 4           | 5          | 6          | 7           | 8           | 9      | 10 |
| NW England            | Headaches | Anxiety    | Depression  | Back Pain   | Neonatal    | Conduct    | Dermatitis | Asthma      | Drugs       | Acne   |    |
|                       | [0.92]    | [1.01]     | [1.11]      | [0.93]      | [1.12]      | [0.99]     | [1.55]     | [1.71]      | [2.3]       | [1.33] |    |
| Blackburn with Darwen | Headaches | Anxiety    | Back Pain   | Depression  | Neonatal    | Conduct    | Dermatitis | Asthma      | Drugs       | Acne   |    |
|                       | [0.91]    | [1.05]     | [0.95]      | [1.08]      | [1.11]      | [0.98]     | [1.56]     | [1.73]      | [2.3]       | [1.35] |    |
| Blackpool             | Headaches | Anxiety    | Back Pain   | Depression  | Neonatal    | Conduct    | Asthma     | Dermatitis  | Drugs       | Acne   |    |
|                       | [0.92]    | [1.07]     | [0.97]      | [1.1]       | [1.08]      | [0.96]     | [1.79]     | [1.57]      | [2.62]      | [1.39] |    |
| Bolton                | Headaches | Anxiety    | Back Pain   | Depression  | Conduct     | Neonatal   | Dermatitis | Asthma      | Drugs       | Acne   |    |
|                       | [0.91]    | [1.04]     | [0.96]      | [1.09]      | [0.98]      | [1.06]     | [1.55]     | [1.7]       | [2.41]      | [1.37] |    |
| Bury                  | Headaches | Anxiety    | Back Pain   | Depression  | Conduct     | Neonatal   | Dermatitis | Asthma      | Drugs       | Acne   |    |
|                       | [0.9]     | [1.02]     | [0.95]      | [1.08]      | [0.99]      | [1.01]     | [1.55]     | [1.69]      | [2.24]      | [1.34] |    |
| Cheshire E            | Headaches | Neonatal   | Anxiety     | Back Pain   | Depression  | Conduct    | Dermatitis | Asthma      | Acne        | Drugs  |    |
|                       | [0.93]    | [1.38]     | [0.99]      | [0.94]      | [1.09]      | [1.01]     | [1.56]     | [1.7]       | [1.3]       | [2.18] |    |
| Cheshire W & Chester  | Headaches | Anxiety    | Back Pain   | Depression  | Neonatal    | Conduct    | Dermatitis | Asthma      | Acne        | Drugs  |    |
|                       | [0.93]    | [1.0]      | [0.94]      | [1.1]       | [1.12]      | [1.0]      | [1.55]     | [1.69]      | [1.33]      | [2.27] |    |
| Cumbria               | Headaches | Anxiety    | Back Pain   | Depression  | Neonatal    | Conduct    | Dermatitis | Asthma      | Drugs       | Acne   |    |
|                       | [0.92]    | [1.02]     | [0.94]      | [1.1]       | [1.11]      | [0.99]     | [1.55]     | [1.71]      | [2.34]      | [1.39] |    |
| Halton                | Headaches | Anxiety    | Back Pain   | Depression  | Neonatal    | Conduct    | Dermatitis | Asthma      | Drugs       | Acne   |    |
|                       | [0.92]    | [1.03]     | [0.93]      | [1.09]      | [1.14]      | [0.98]     | [1.56]     | [1.72]      | [2.24]      | [1.34] |    |
| Knowsley              | Headaches | Anxiety    | Back Pain   | Depression  | Neonatal    | Conduct    | Asthma     | Dermatitis  | Drugs       | Acne   |    |
|                       | [0.92]    | [1.03]     | [0.95]      | [1.1]       | [1.09]      | [0.98]     | [1.76]     | [1.55]      | [2.36]      | [1.37] |    |
| Lancashire            | Headaches | Anxiety    | Depression  | Back Pain   | Neonatal    | Conduct    | Dermatitis | Asthma      | Drugs       | Acne   |    |
|                       | [0.93]    | [1.02]     | [1.1]       | [0.88]      | [1.08]      | [0.99]     | [1.55]     | [1.71]      | [2.34]      | [1.37] |    |
| Liverpool             | Headaches | Depression | Anxiety     | Back Pain   | Neonatal    | Conduct    | Dermatitis | Asthma      | Drugs       | Acne   |    |
|                       | [0.96]    | [1.31]     | [0.93]      | [0.96]      | [1.21]      | [0.98]     | [1.54]     | [1.7]       | [2.48]      | [1.35] |    |
| Manchester            | Headaches | Anxiety    | Back Pain   | Neonatal    | Depression  | Conduct    | Asthma     | Dermatitis  | Acne        | Drugs  |    |
|                       | [0.95]    | [0.98]     | [0.98]      | [1.2]       | [1.11]      | [1.02]     | [1.73]     | [1.55]      | [1.22]      | [2.22] |    |
| Oldham                | Headaches | Anxiety    | Back Pain   | Depression  | Conduct     | Dermatitis | Asthma     | Neonatal    | Drugs       | Acne   |    |
|                       | [0.91]    | [1.05]     | [0.96]      | [1.09]      | [0.97]      | [1.56]     | [1.77]     | [0.83]      | [2.32]      | [1.37] |    |
| Rochdale              | Headaches | Anxiety    | Back Pain   | Depression  | Conduct     | Dermatitis | Asthma     | Neonatal    | Drugs       | Acne   |    |
|                       | [0.91]    | [1.05]     | [0.96]      | [1.09]      | [0.97]      | [1.56]     | [1.74]     | [0.86]      | [2.37]      | [1.39] |    |
| Salford               | Headaches | Anxiety    | Neonatal    | Back Pain   | Depression  | Conduct    | Dermatitis | Asthma      | Drugs       | Acne   |    |
|                       | [0.92]    | [1.02]     | [1.25]      | [0.95]      | [1.09]      | [0.99]     | [1.56]     | [1.72]      | [2.23]      | [1.29] |    |
| Sefton                | Headaches | Anxiety    | Back Pain   | Depression  | Neonatal    | Conduct    | Dermatitis | Asthma      | Drugs       | Acne   |    |
|                       | [0.92]    | [1.04]     | [0.94]      | [1.09]      | [1.12]      | [0.98]     | [1.55]     | [1.71]      | [2.42]      | [1.39] |    |
| St Helens             | Headaches | Anxiety    | Back Pain   | Depression  | Neonatal    | Conduct    | Dermatitis | Asthma      | Drugs       | Acne   |    |
|                       | [0.91]    | [1.04]     | [0.95]      | [1.09]      | [1.13]      | [0.98]     | [1.55]     | [1.71]      | [2.39]      | [1.37] |    |
| Stockport             | Headaches | Anxiety    | Back Pain   | Depression  | Conduct     | Dermatitis | Neonatal   | Asthma      | Acne        | Drugs  |    |
|                       | [0.92]    | [1.01]     | [0.93]      | [1.09]      | [1.0]       | [1.56]     | [0.94]     | [1.68]      | [1.31]      | [2.24] |    |
| Tameside              | Headaches | Anxiety    | Depression  | Conduct     | Dermatitis  | Back Pain  | Asthma     | Neonatal    | Drugs       | Acne   |    |
|                       | [0.91]    | [1.05]     | [1.09]      | [0.97]      | [1.56]      | [0.77]     | [1.74]     | [0.92]      | [2.31]      | [1.39] |    |
| Trafford              | Headaches | Anxiety    | Neonatal    | Back Pain   | Depression  | Conduct    | Dermatitis | Asthma      | Acne        | Drugs  |    |
|                       | [0.91]    | [0.98]     | [1.22]      | [0.91]      | [1.07]      | [1.03]     | [1.57]     | [1.7]       | [1.25]      | [2.04] |    |
| Warrington            | Headaches | Anxiety    | Neonatal    | Back Pain   | Depression  | Conduct    | Dermatitis | Asthma      | Acne        | Drugs  |    |
|                       | [0.92]    | [0.99]     | [1.3]       | [0.93]      | [1.09]      | [1.01]     | [1.55]     | [1.72]      | [1.29]      | [2.25] |    |
| Wigan                 | Headaches | Anxiety    | Back Pain   | Depression  | Neonatal    | Conduct    | Dermatitis | Asthma      | Drugs       | Acne   |    |
|                       | [0.91]    | [1.04]     | [0.95]      | [1.08]      | [1.13]      | [0.98]     | [1.55]     | [1.71]      | [2.34]      | [1.38] |    |
| Wirral                | Headaches | Anxiety    | Neonatal    | Back Pain   | Depression  | Conduct    | Dermatitis | Asthma      | Drugs       | Acne   |    |
|                       | [0.91]    | [1.04]     | [1.27]      | [0.94]      | [1.09]      | [0.98]     | [1.55]     | [1.7]       | [2.36]      | [1.38] |    |
| SE England            | Headaches | Anxiety    | Depression  | Back Pain   | Conduct     | Dermatitis | Neonatal   | Asthma      | Acne        | Drugs  |    |
|                       | [0.92]    | [1.0]      | [1.09]      | [0.91]      | [1.0]       | [1.71]     | [1.03]     | [1.81]      | [1.34]      | [2.19] |    |
| Bracknell Forest      | Headaches | Anxiety    | Back Pain   | Depression  | Conduct     | Dermatitis | Asthma     | Acne        | Neonatal    | Drugs  |    |
|                       | [0.92]    | [0.99]     | [0.91]      | [1.08]      | [1.02]      | [1.56]     | [1.65]     | [1.32]      | [0.8]       | [2.13] |    |
| Brighton & Hove       | Headaches | Anxiety    | Depression  | Back Pain   | Dermatitis  | Neonatal   | Conduct    | Asthma      | Acne        | Drugs  |    |
|                       | [0.96]    | [0.98]     | [1.13]      | [0.93]      | [1.85]      | [1.12]     | [1.01]     | [1.65]      | [1.32]      | [2.39] |    |
| Buckinghamshire       | Headaches | Anxiety    | Back Pain   | Depression  | Neonatal    | Conduct    | Dermatitis | Asthma      | Acne        | Drugs  |    |
|                       | [0.92]    | [0.99]     | [0.92]      | [1.09]      | [1.15]      | [1.01]     | [1.56]     | [1.63]      | [1.31]      | [2.12] |    |
| E Sussex              | Headaches | Anxiety    | Depression  | Back Pain   | Dermatitis  | Neonatal   | Conduct    | Asthma      | Drugs       | Acne   |    |
|                       | [0.92]    | [1.04]     | [1.1]       | [0.94]      | [1.83]      | [1.1]      | [0.97]     | [1.59]      | [2.33]      | [1.42] |    |
| Hampshire             | Headaches | Asthma     | Anxiety     | Back Pain   | Depression  | Conduct    | Neonatal   | Dermatitis  | Acne        | Drugs  |    |
|                       | [0.92]    | [2.51]     | [1.0]       | [0.92]      | [1.09]      | [1.0]      | [1.01]     | [1.56]      | [1.38]      | [2.18] |    |
| Isle of Wight         | Headaches | Asthma     | Anxiety     | Depression  | Back Pain   | Conduct    | Neonatal   | Dermatitis  | Acne        | Drugs  |    |
|                       | [0.92]    | [2.54]     | [1.03]      | [1.1]       | [0.94]      | [0.98]     | [0.95]     | [1.5]       | [1.46]      | [2.37] |    |

**Figure 9e. Leading ten causes of YLDs with the ratio of observed YLDs to YLDs expected on the basis of Socio-Demographic Index alone in 2017, 10-19 years, both sexes combined.** The top ten causes contributing to YLDs are listed globally, by socio-demographic quintile, and then by GBD superregion, region, country, and subnationally where modeled. For each cell, the ratio of observed YLDs to YLDs expected on the basis of socio-demographic index (SDI) alone are listed. Abbreviations: YLD=year of life lived with disability, GBD=Global Burden of Disease.

Values shown in brackets represent the ratio of observed YLDs to predicted YLDs on the basis of Socio-Demographic Index (SDI), rounded to two (2) digits. Color ranges (shown below) were calculated to place a roughly equal number of cells into each bin.

| COLOR KEY:           |                     | [0.0-0.77]         | [0.77-0.91]          | [0.91-0.97]          | [0.97-1.02]          | [1.02-1.1]           | [1.1-1.25]           | [1.25-1.48]          | [1.48-1.87]     | 1.87+           |
|----------------------|---------------------|--------------------|----------------------|----------------------|----------------------|----------------------|----------------------|----------------------|-----------------|-----------------|
[truncated: 1,385,699 more chars]
